# Supplementary material for: Cobalt-catalyzed enantioselective C–H/N–H annulation of aryl sulfonamides with allenes or alkynes: facile access to C–N axially chiral sultams
Source: Royal Society of Chemistry journal article supplement (doi:10.1039/d3sc01787g), 2023-01-01

## *Supplementary Information*

### **Cobalt-catalyzed enantioselective C-H/N-H annulation of aryl sulfonamides with allenes or alkynes: facile access to C-N axially chiral sultams**

Xiao-Ju Si,<sup>‡</sup> Xiaofang Zhao,<sup>‡</sup> Jianli Wang,<sup>‡</sup> Xinhai Wang, Yuanshuo Zhang, Dandan Yang,<sup>\*</sup> Mao-Ping Song and Jun-Long Niu<sup>\*</sup>

College of Chemistry, Zhengzhou University, Zhengzhou 450001 (P. R. China).

<sup>‡</sup>These authors contributed equally: Xiao-Ju Si, Xiaofang Zhao, Jianli Wang

<sup>\*</sup>Corresponding author. Email: yangdandan@zzu.edu.cn, niujunlong@zzu.edu.cn

## Table of contents

|                                                                                                |     |
|------------------------------------------------------------------------------------------------|-----|
| General information .....                                                                      | 1   |
| I. Supplemental experimental procedures .....                                                  | 2   |
| 1. Optimization of reaction conditions.....                                                    | 2   |
| 1.1 Optimization of reaction conditions for <b>4aa</b> .....                                   | 2   |
| 1.2 Optimization of <b>5aa</b> reaction conditions.....                                        | 7   |
| 1.3 Optimization of <b>6a</b> reaction conditions.....                                         | 13  |
| 2. General procedure for the synthesis of <b>1, 2</b> .....                                    | 15  |
| 3. General procedure for synthesis of racemic samples <b>4, 5</b> and <b>6</b> .....           | 15  |
| 3.1 General procedure for synthesis of racemic product <b>4</b> .....                          | 15  |
| 3.2 General procedure for synthesis of racemic product <b>5</b> or <b>6</b> .....              | 16  |
| 4. General procedure for synthesis of enantioenriched compounds <b>4, 5</b> and <b>6</b> ..... | 16  |
| 4.1 General procedure for synthesis of enantioenriched compounds <b>4</b> .....                | 16  |
| 4.2 General procedure for synthesis of enantioenriched compounds <b>5</b> .....                | 17  |
| 4.3 General procedure for synthesis of enantioenriched compounds <b>6</b> .....                | 17  |
| 5. Mechanistic studies .....                                                                   | 17  |
| 5.1 H/D exchange experiments .....                                                             | 17  |
| 5.2 Parallel KIE experiments .....                                                             | 19  |
| 5.3 Deuteryl labeling experiment.....                                                          | 22  |
| 5.4 Nonlinear effect study of <b>4aa</b> with <b>L7</b> .....                                  | 23  |
| 6. Synthetic application.....                                                                  | 24  |
| 7. Gram scale .....                                                                            | 25  |
| 7.1 Gram scale experiment of <b>4aa</b> .....                                                  | 25  |
| 7.2 Gram scale experiment of <b>5aa</b> .....                                                  | 25  |
| 7.3 Gram scale experiment of <b>6a</b> .....                                                   | 26  |
| 8. Study on product stability .....                                                            | 27  |
| 9. X-ray crystal structure of <b>4aa, 5aa</b> .....                                            | 38  |
| II. Supplemental references .....                                                              | 42  |
| III. Characterization (NMR, HRMS, and HPLC) data .....                                         | 43  |
| IV. NMR spectra for new compounds .....                                                        | 142 |



## General information

$^1\text{H}$  NMR,  $^{13}\text{C}$  NMR and  $^{19}\text{F}$  NMR spectra were recorded at 600 MHz, 151 MHz, and 565 MHz respectively on a Bruker DPX instrument using  $\text{Me}_4\text{Si}$  as an internal standard. High resolution mass spectra (HRMS) for new compounds were measured on a Waters ACQUITY UPLC I-Class PLUS liquid chromatogram coupled with a Waters Xevo G2-XS QToF mass spectrometer. The column was ACQUITY UPLC BEH C18 LC Column (2.1-100 mm, Waters). Melting points were measured on a WC-1 instrument and uncorrected. Chemical shift multiplicities are reported as follows: (s = singlet, d = doublet, t = triplet, q = quartet, m = multiplet, br = broad, dd = doublet of doublet, dt = doublet of triplet, td = triplet of doublet). Unless otherwise mentioned, all materials were commercially obtained and used without further purification, and all the reactions were performed under the air unless otherwise noted. Chiral HPLC analysis was performed on Agilent 1260 Infinity LC instrument using Daicel Chiracel columns at 25 °C and a mixture of HPLC-grade hexanes and isopropanol as eluent. Chiralpak AD-H, AS-H, OD-H, IB-H, IC-H columns were purchased from Daicel Chemical Industries LTD. The specific rotations for were measured on WZZ-3A polarimeter. The absolute configuration of **4aa**, **5aa** were assigned by the X-ray analysis.

## I. Supplemental experimental procedures

### 1. Optimization of reaction conditions

#### 1.1 Optimization of reaction conditions for 4aa

Table S1. Optimization of ligands<sup>a</sup>

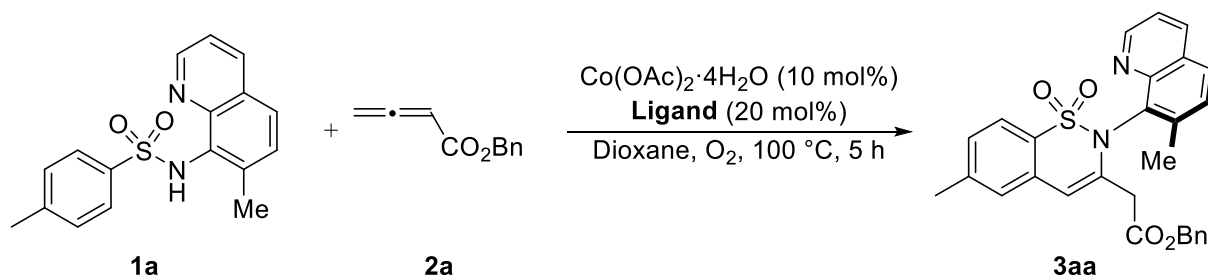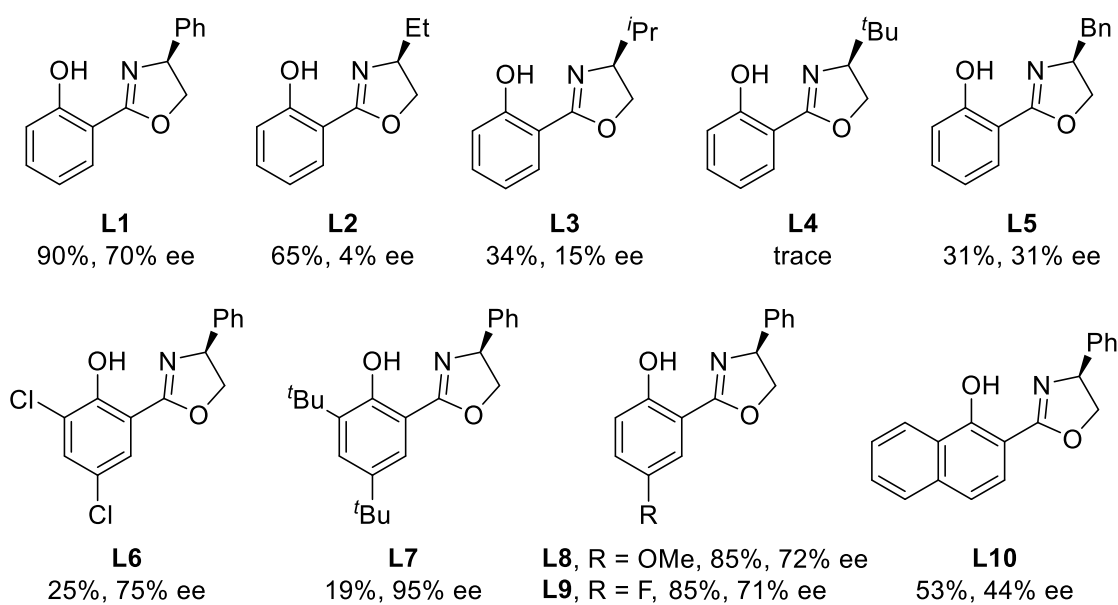

| Entry | Ligand | Yield (%) | ee (%) <sup>b</sup> |
|-------|--------|-----------|---------------------|
| 1     | L1     | 90        | 70                  |
| 2     | L2     | 65        | 4                   |
| 3     | L3     | 34        | 15                  |
| 4     | L4     | Trace     |                     |
| 5     | L5     | 31        | 31                  |
| 6     | L6     | 25        | 75                  |
| 7     | L7     | 19        | 95                  |
| 8     | L8     | 85        | 72                  |

|    |            |    |    |
|----|------------|----|----|
| 9  | <b>L9</b>  | 85 | 71 |
| 10 | <b>L10</b> | 53 | 44 |

<sup>a</sup>Reaction conditions: **1a** (0.1 mmol), **2a** (0.3 mmol), catalyst (10 mol%), Ligand (20 mol%), dioxane (1.0 mL), 100 °C, O<sub>2</sub>, 5 h, isolated yields. <sup>b</sup>Determined by chiral HPLC analysis.

**Table S2.** Optimization of solvents<sup>a</sup>

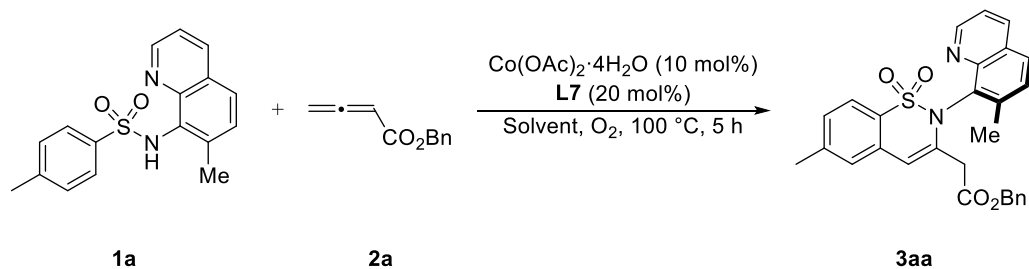

| Entry | Solvent                               | Yield (%) | ee (%) <sup>b</sup> |
|-------|---------------------------------------|-----------|---------------------|
| 1     | Dioxane                               | 19        | 95                  |
| 2     | DCM                                   | 81        | 92                  |
| 3     | <b>(CHCl<sub>2</sub>)<sub>2</sub></b> | <b>61</b> | <b>95</b>           |
| 4     | DCE                                   | 59        | 92                  |
| 5     | CHCl <sub>3</sub>                     | 44        | 87                  |
| 6     | 1,2,3-Trichloropropane                | 35        | 92                  |
| 7     | CCl <sub>4</sub>                      | 7         | 93                  |
| 8     | 1,2-Dichlorobenzene                   | 45        | 91                  |
| 9     | PhCF <sub>3</sub>                     | 56        | 93                  |
| 10    | PhOMe                                 | 51        | 93                  |
| 11    | Acetone                               | 8         | 89                  |
| 12    | PhCN                                  | 44        | 89                  |
| 13    | TFE                                   | 55        | 90                  |

<sup>a</sup>Reaction conditions: **1a** (0.1 mmol), **2a** (0.3 mmol), Co(OAc)<sub>2</sub>·4H<sub>2</sub>O (10 mol%), **L7** (20 mol%), solvent (1.0 mL), 100 °C, O<sub>2</sub>, 5 h, isolated yields. <sup>b</sup>Determined by chiral HPLC analysis.

**Table S3.** Optimization of additives<sup>a</sup>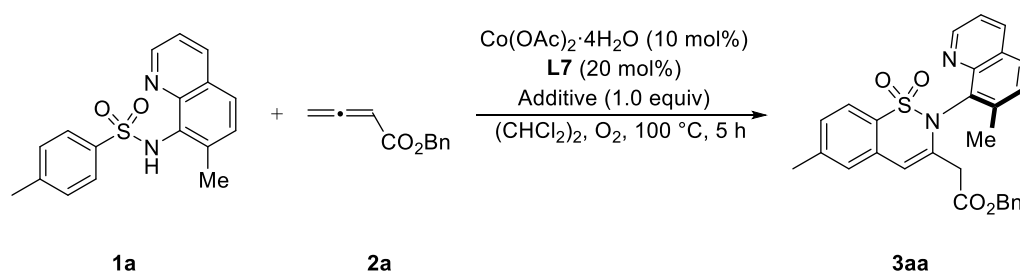

| Entry | Additive     | Yield (%) | ee (%) <sup>b</sup> |
|-------|--------------|-----------|---------------------|
| 1     | --           | 61        | 95                  |
| 2     | <b>PivOH</b> | <b>90</b> | <b>95</b>           |
| 3     | PhCOOH       | 89        | 94                  |
| 4     | 1-AdCOOH     | 90        | 94                  |
| 5     | AcOH         | 85        | 94                  |

<sup>a</sup>Reaction conditions: **1a** (0.1 mmol), **2a** (0.3 mmol),  $\text{Co(OAc)}_2 \cdot 4\text{H}_2\text{O}$  (10 mol%), **L7** (20 mol%), additive (1.0 equiv), 1,1,2,2-Tetrachloroethane (1.0 mL), 100 °C,  $\text{O}_2$ , 5 h, isolated yields. <sup>b</sup>Determined by chiral HPLC analysis.

**Table S4.** Optimization of the amounts of catalyst and ligand<sup>a</sup>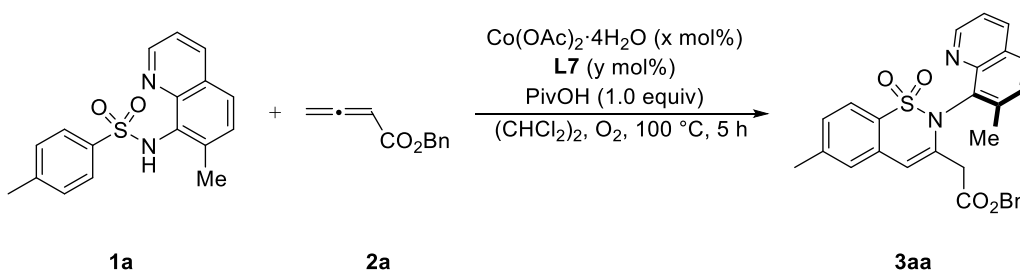

| Entry | x        | y        | Yield (%) <sup>b</sup> | ee (%)    |
|-------|----------|----------|------------------------|-----------|
| 1     | 10       | 20       | 90                     | 95        |
| 2     | 5        | 10       | 86                     | 94        |
| 3     | <b>5</b> | <b>5</b> | <b>83</b>              | <b>94</b> |
| 4     | 2.5      | 5        | 55                     | 92        |

<sup>a</sup>Reaction conditions: **1a** (0.1 mmol), **2a** (0.3 mmol),  $\text{Co(OAc)}_2 \cdot 4\text{H}_2\text{O}$  (x mol%), **L7** (y mol%), PivOH (1.0 equiv), 1,1,2,2-Tetrachloroethane (1.0 mL), 100 °C,  $\text{O}_2$ , 5 h, isolated yields. <sup>b</sup>Determined by chiral HPLC analysis.

**Table S5.** Optimization of temperature<sup>a</sup>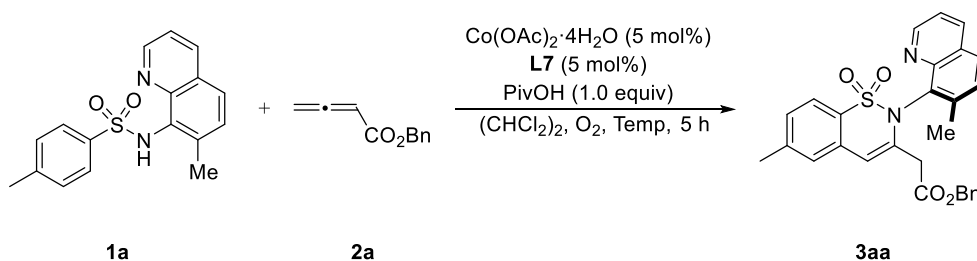

| Entry    | Temp (°C)  | Yield (%) | ee (%) <sup>b</sup> |
|----------|------------|-----------|---------------------|
| <b>1</b> | <b>100</b> | <b>83</b> | <b>94</b>           |
| 2        | 80         | 76        | 94                  |
| 3        | 60         | 48        | 94                  |

<sup>a</sup>Reaction conditions: **1a** (0.1 mmol), **2a** (0.3 mmol),  $\text{Co}(\text{OAc})_2 \cdot 4\text{H}_2\text{O}$  (10 mol%), **L7** (20 mol%), PivOH (1.0 equiv), 1,1,2,2-Tetrachloroethane (1.0 mL),  $\text{O}_2$ , 5 h, isolated yields. <sup>b</sup>Determined by chiral HPLC analysis.

**Table S6.** Optimization of the amount of **2a**<sup>a</sup>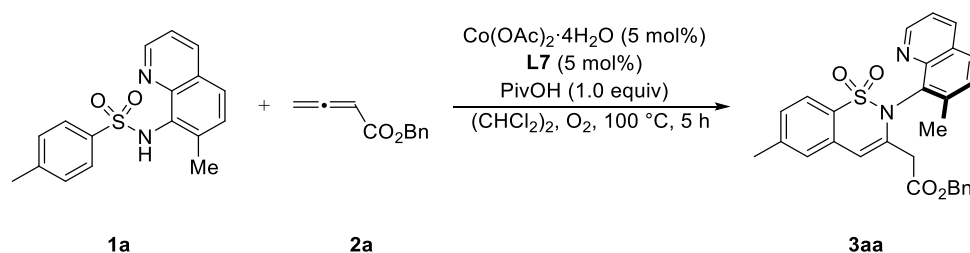

| Entry    | <b>2a</b> (x equiv) | Yield (%) <sup>b</sup> | ee (%)    |
|----------|---------------------|------------------------|-----------|
| 1        | 3                   | 83                     | 94        |
| 2        | 2                   | 83                     | 94        |
| <b>3</b> | <b>1.5</b>          | <b>87</b>              | <b>94</b> |

<sup>a</sup>Reaction conditions: **1a** (0.1 mmol), **2a** (x mmol),  $\text{Co}(\text{OAc})_2 \cdot 4\text{H}_2\text{O}$  (5 mol%), **L7** (5 mol%), PivOH (1.0 equiv), 1,1,2,2-Tetrachloroethane (1.0 mL),  $\text{O}_2$ , 100 °C, 5 h, isolated yields. <sup>b</sup>Determined by chiral HPLC analysis.

**Table S7.** Optimization of time<sup>a</sup>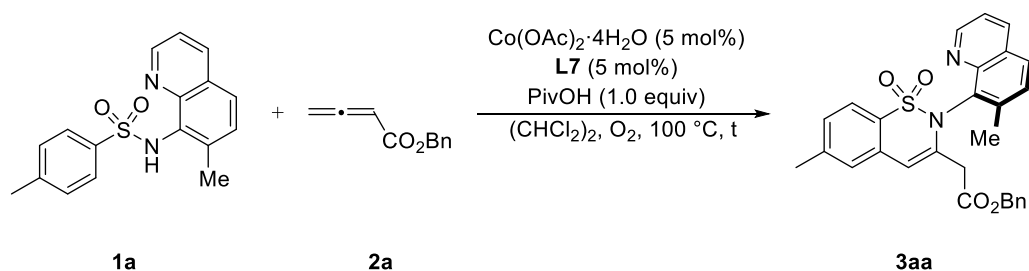

| Entry | Time (h) | Yield (%) | ee (%) <sup>b</sup> |
|-------|----------|-----------|---------------------|
| 1     | 6        | 90        | 94                  |
| 2     | 5        | 90        | 94                  |
| 3     | 4        | 86        | 94                  |
| 4     | 3        | 86        | 94                  |
| 5     | 2        | 77        | 94                  |

<sup>a</sup>Reaction conditions: **1a** (0.2 mmol), **2a** (0.3 mmol),  $\text{Co}(\text{OAc})_2 \cdot 4\text{H}_2\text{O}$  (5 mol%), **L7** (5 mol%), PivOH (1.0 equiv), 1,1,2,2-Tetrachloroethane (1.0 mL),  $\text{O}_2$ , 100 °C 5 h, isolated yields. <sup>b</sup>Determined by chiral HPLC analysis.

**Table S8.** Optimization of atmosphere<sup>a</sup>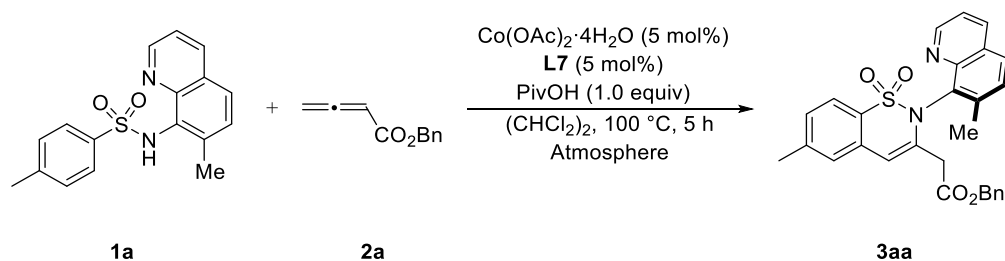

| Entry | atmosphere   | Yield (%) | ee (%) <sup>b</sup> |
|-------|--------------|-----------|---------------------|
| 1     | air          | 49        | 92                  |
| 2     | $\text{O}_2$ | 90        | 94                  |
| 3     | Ar           | N.R.      |                     |

<sup>a</sup>Reaction conditions: **1a** (0.2 mmol), **2a** (0.3 mmol),  $\text{Co}(\text{OAc})_2 \cdot 4\text{H}_2\text{O}$  (5 mol%), **L7** (5 mol%), PivOH (1.0 equiv), 1,1,2,2-Tetrachloroethane (1.0 mL), atmosphere, 100 °C 5 h, isolated yields. <sup>b</sup>Determined by chiral HPLC analysis.

## 1.2 Optimization of 5aa reaction conditions

**Table S9. Optimization of solvents<sup>a</sup>**

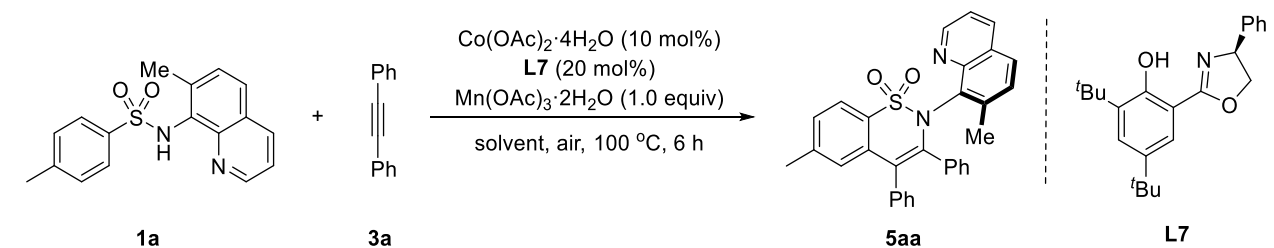

| Entry | Solvent            | <b>5aa</b> (%) | ee (%) <sup>b</sup> |
|-------|--------------------|----------------|---------------------|
| 1     | MeOH               | 41             | 99                  |
| 2     | <i>i</i> PrOH      | 31             | 99                  |
| 3     | 1-Butanol          | 31             | 99                  |
| 4     | 2-methyl-2-butanol | 32             | 98                  |
| 5     | PhCl               | trace          | --                  |
| 6     | DCM                | trace          | --                  |
| 7     | CH <sub>3</sub> CN | trace          | --                  |
| 8     | DMF                | trace          | --                  |
| 9     | Dioxane            | 35             | 99                  |
| 10    | THF                | 32             | 98                  |
| 11    | MTBE               | 27             | 98                  |

<sup>a</sup>Unless otherwise mentioned, all reactions were carried out using **1a** (0.1 mmol), **3a** (0.2 mmol),  $\text{Co}(\text{OAc})_2 \cdot 4\text{H}_2\text{O}$  (10 mol%), Ligand (20 mol%),  $\text{Mn}(\text{OAc})_3 \cdot 2\text{H}_2\text{O}$  (0.1 mmol) in solvent (1 mL) under air at 100 °C for 6 h. <sup>b</sup>Isolated yield.

**Table S10. Optimization of ligands<sup>a</sup>**

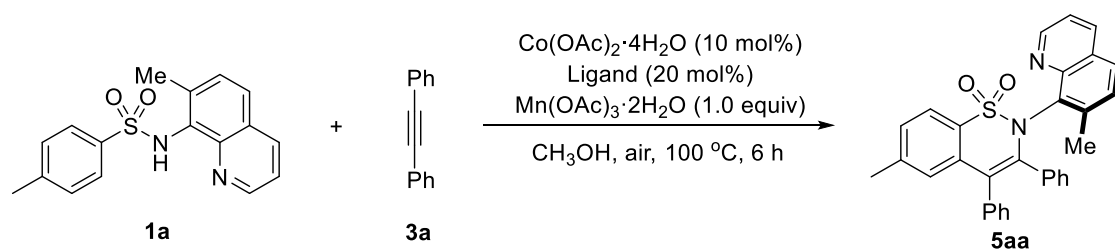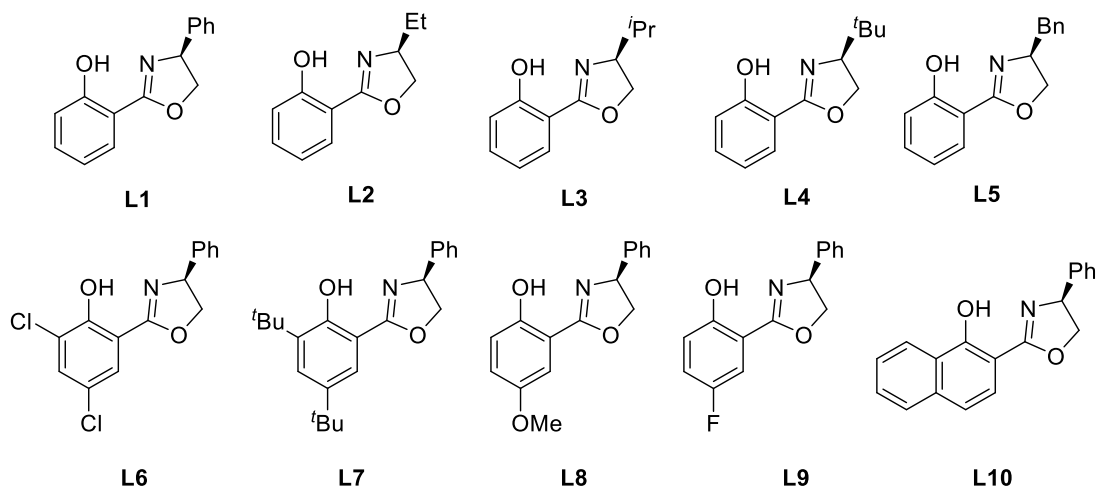

| Entry | Ligand     | <b>5aa</b> (%) | ee (%) <sup>b</sup> |
|-------|------------|----------------|---------------------|
| 1     | <b>L1</b>  | 26             | 96                  |
| 2     | <b>L2</b>  | 8              | 75                  |
| 3     | <b>L3</b>  | 8              | 66                  |
| 4     | <b>L4</b>  | trace          |                     |
| 5     | <b>L5</b>  | 15             | 81                  |
| 6     | <b>L6</b>  | 34             | 95                  |
| 7     | <b>L7</b>  | <b>41</b>      | <b>99</b>           |
| 8     | <b>L8</b>  | 25             | 95                  |
| 9     | <b>L9</b>  | 23             | 95                  |
| 10    | <b>L10</b> | 39             | 97                  |

<sup>a</sup>Unless otherwise mentioned, all reactions were carried out using **1a** (0.1 mmol), **3a** (0.2 mmol),  $\text{Co}(\text{OAc})_2 \cdot 4\text{H}_2\text{O}$  (10 mol%), Ligand (20 mol%),  $\text{Mn}(\text{OAc})_3 \cdot 2\text{H}_2\text{O}$  (0.1 mmol) in MeOH (1 mL) under air at 100 °C for 6 h.



**Table S11. Optimization of Mn salts<sup>a</sup>**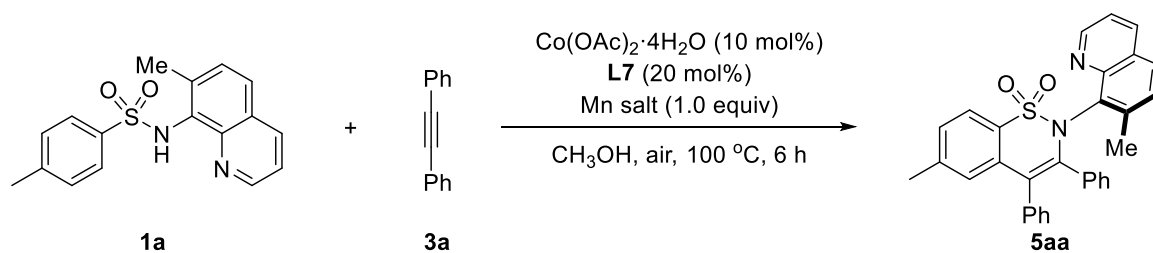

| Entry | Mn salt                                              | 5aa (%)           | ee (%) <sup>b</sup> |
|-------|------------------------------------------------------|-------------------|---------------------|
| 1     | <b>Mn(OAc)<sub>3</sub>·2H<sub>2</sub>O</b>           | <b>41</b>         | <b>99</b>           |
| 2     | Mn(OAc) <sub>2</sub>                                 | 8                 | 98                  |
| 3     | Mn(OAc) <sub>2</sub> ·4H <sub>2</sub> O              | 11                | 97                  |
| 4     | Mn(acac) <sub>2</sub>                                | trace             | --                  |
| 5     | Mn(acac) <sub>3</sub>                                | N.R. <sup>c</sup> | --                  |
| 6     | MnO <sub>2</sub>                                     | trace             | --                  |
| 7     | Mn(NO <sub>3</sub> ) <sub>2</sub> ·4H <sub>2</sub> O | N.R.              | --                  |
| 8     | MnC <sub>2</sub> O <sub>4</sub> ·2H <sub>2</sub> O   | N.R.              | --                  |
| 9     | MnCl <sub>2</sub> ·4H <sub>2</sub> O                 | N.R.              | --                  |
| 10    | MnBr <sub>2</sub> ·H <sub>2</sub> O                  | N.R.              | --                  |

<sup>a</sup>Unless otherwise mentioned, all reactions were carried out using **1a** (0.1 mmol), **3a** (0.2 mmol),  $\text{Co(OAc)}_2 \cdot 4\text{H}_2\text{O}$  (10 mol%), Ligand (20 mol%), Mn salt (0.1 mmol) in MeOH (1 mL) under air at 100 °C for 6 h. <sup>c</sup>No reaction.

**Table S12. Optimization of Co salts<sup>a</sup>**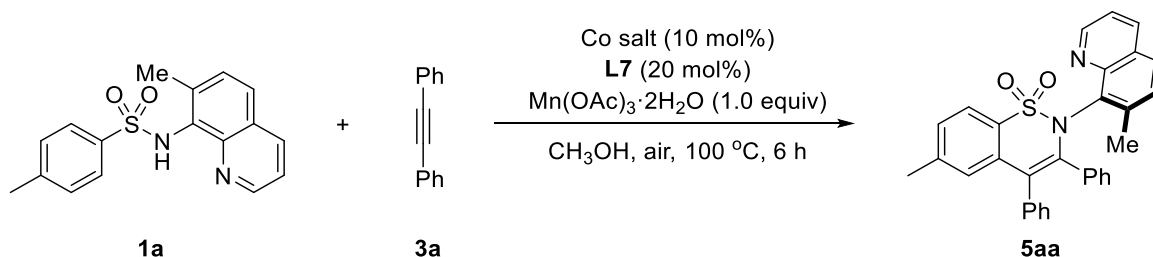

| Entry | Co salt                                    | 5aa (%)   | ee (%) <sup>b</sup> |
|-------|--------------------------------------------|-----------|---------------------|
| 1     | <b>Co(OAc)<sub>2</sub>·4H<sub>2</sub>O</b> | <b>41</b> | <b>99</b>           |
| 2     | Co(OAc) <sub>2</sub>                       | 41        | 99                  |

|   |                                                                    |    |    |
|---|--------------------------------------------------------------------|----|----|
| 3 | Co(C <sub>2</sub> O <sub>4</sub> ) <sub>2</sub> ·4H <sub>2</sub> O | 38 | 99 |
| 4 | Co(OOCC <sub>6</sub> H <sub>5</sub> ) <sub>2</sub>                 | 32 | 99 |
| 5 | CoCl <sub>2</sub> ·6H <sub>2</sub> O                               | 35 | 99 |
| 6 | Co(ClO <sub>4</sub> ) <sub>2</sub> ·6H <sub>2</sub> O              | 31 | 99 |

<sup>a</sup>Unless otherwise mentioned, all reactions were carried out using **1a** (0.1 mmol), **3a** (0.2 mmol), Co salt (10 mol%), Ligand (20 mol%), Mn(OAc)<sub>3</sub>·2H<sub>2</sub>O (0.1 mmol) in MeOH (1 mL) under air at 100 °C for 6 h. <sup>b</sup>Isolated yield.

**Table S13. Optimization of additives<sup>a</sup>**

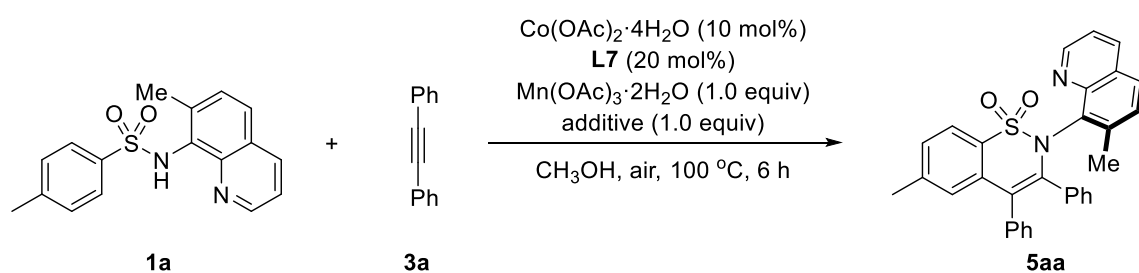

| Entry | additive                                             | <b>5aa</b> (%) | ee (%) <sup>b</sup> |
|-------|------------------------------------------------------|----------------|---------------------|
| 1     | PivOH                                                | 23             | 99                  |
| 2     | AcOH                                                 | 29             | 99                  |
| 3     | 1-AdCOOH                                             | 32             | 99                  |
| 4     | Triphenylacetic acid                                 | 31             | 99                  |
| 5     | <b>NaOPiv</b>                                        | <b>48</b>      | <b>99</b>           |
| 6     | CsOPiv                                               | 39             | 99                  |
| 7     | NaOAc                                                | 40             | 98                  |
| 8     | Na <sub>2</sub> C <sub>2</sub> O <sub>4</sub>        | 37             | 99                  |
| 9     | Na <sub>2</sub> CO <sub>3</sub>                      | 42             | 99                  |
| 10    | Na <sub>2</sub> HPO <sub>4</sub> ·12H <sub>2</sub> O | 41             | 99                  |
| 11    | DBU                                                  | 35             | 99                  |

<sup>a</sup>Unless otherwise mentioned, all reactions were carried out using **1a** (0.1 mmol), **3a** (0.2 mmol), Co(OAc)<sub>2</sub>·4H<sub>2</sub>O (10 mol%), Ligand (20 mol%), Mn(OAc)<sub>3</sub>·2H<sub>2</sub>O (0.1 mmol), additive (0.1 mmol) in MeOH (1 mL) under air at 100 °C for 6 h. <sup>b</sup>Isolated yield.

**Table S14. Optimization of the amount of NaOPiv<sup>a</sup>**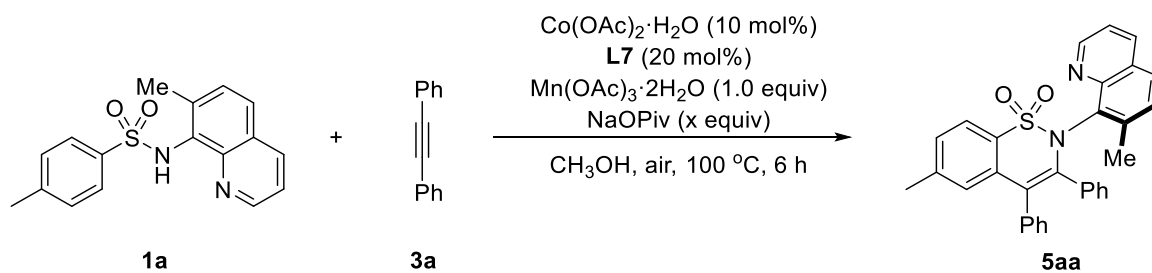

| Entry | x          | <b>5aa</b> (%) | ee (%) <sup>b</sup> |
|-------|------------|----------------|---------------------|
| 1     | 0.5        | 43             | 99                  |
| 2     | <b>1.0</b> | <b>48</b>      | <b>99</b>           |
| 3     | 2.0        | 48             | 99                  |

<sup>a</sup>Unless otherwise mentioned, all reactions were carried out using **1a** (0.1 mmol), **3a** (0.2 mmol),  $\text{Co}(\text{OAc})_2 \cdot 4\text{H}_2\text{O}$  (10 mol%), Ligand (20 mol%),  $\text{Mn}(\text{OAc})_3 \cdot 2\text{H}_2\text{O}$  (0.1 mmol), NaOPiv (x equiv) in MeOH (1 mL) under air at 100 °C for 6 h. <sup>b</sup>Isolated yield.

**Table S15. Optimization of temperature<sup>a</sup>**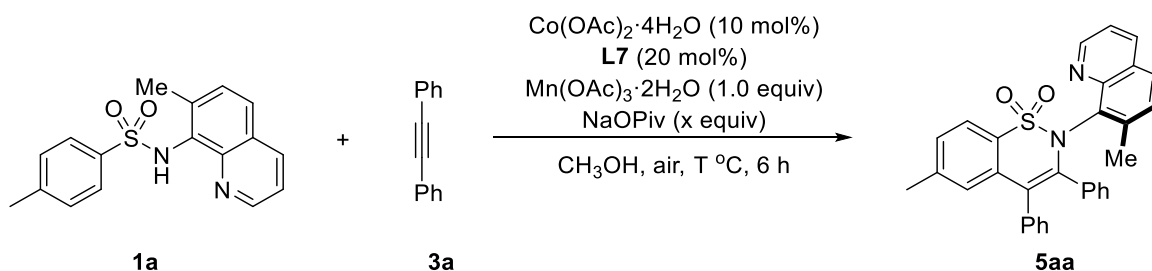

| Entry | T          | <b>5aa</b> (%) | ee (%) <sup>b</sup> |
|-------|------------|----------------|---------------------|
| 1     | 60         | 15             | 99                  |
| 2     | 80         | 34             | 99                  |
| 3     | <b>100</b> | <b>48</b>      | <b>99</b>           |

<sup>a</sup>Unless otherwise mentioned, all reactions were carried out using **1a** (0.1 mmol), **3a** (0.2 mmol),  $\text{Co}(\text{OAc})_2 \cdot 4\text{H}_2\text{O}$  (10 mol%), Ligand (20 mol%),  $\text{Mn}(\text{OAc})_3 \cdot 2\text{H}_2\text{O}$  (0.1 mmol), NaOPiv (0.1 mmol) in MeOH (1 mL) under air for 6 h. <sup>b</sup>Isolated yield.

**Table S16. Optimization of time<sup>a</sup>**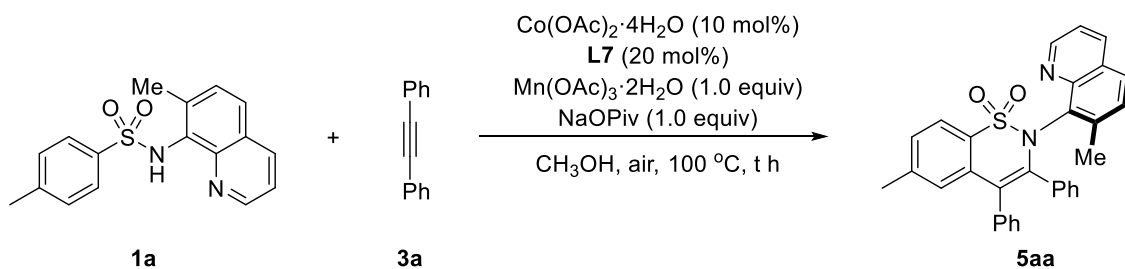

| Entry | t         | <b>5aa</b> (%) | ee (%) <sup>b</sup> |
|-------|-----------|----------------|---------------------|
| 1     | 6         | 48             | 99                  |
| 2     | 12        | 61             | 99                  |
| 3     | 24        | 80             | 99                  |
| 4     | <b>36</b> | <b>93</b>      | <b>98</b>           |

<sup>a</sup>Unless otherwise mentioned, all reactions were carried out using **1a** (0.1 mmol), **3a** (0.2 mmol),  $\text{Co}(\text{OAc})_2 \cdot 4\text{H}_2\text{O}$  (10 mol%), Ligand (20 mol%),  $\text{Mn}(\text{OAc})_3 \cdot 2\text{H}_2\text{O}$  (0.1 mmol),  $\text{NaOPiv}$  (0.1 mmol) in  $\text{MeOH}$  (1 mL) under air at  $100\text{ }^\circ\text{C}$  for 36 h. <sup>b</sup>Isolated yield.

**Table S17. Optimization of the amounts of cobalt salt and ligand<sup>a</sup>**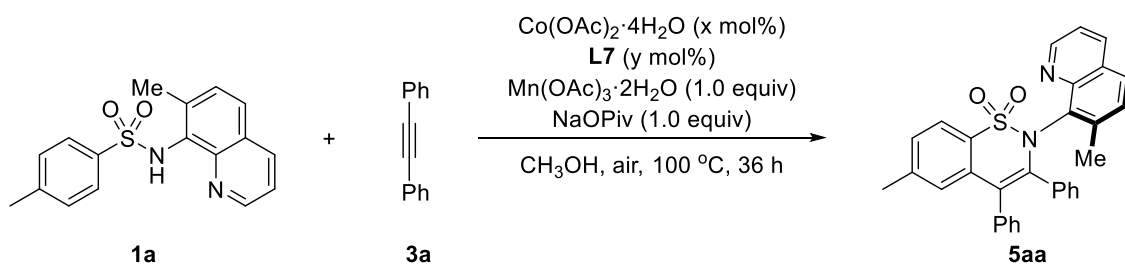

| Entry | x         | y         | <b>5aa</b> (%) | ee (%) <sup>b</sup> |
|-------|-----------|-----------|----------------|---------------------|
| 1     | 5         | 5         | 36             | 97                  |
| 2     | 5         | 10        | 54             | 98                  |
| 3     | 10        | 10        | 85             | 98                  |
| 4     | <b>10</b> | <b>20</b> | <b>93</b>      | <b>98</b>           |

<sup>a</sup>Unless otherwise mentioned, all reactions were carried out using **1a** (0.1 mmol), **3a** (0.2 mmol),  $\text{Co}(\text{OAc})_2 \cdot 4\text{H}_2\text{O}$  (x mol%), Ligand (y mol%),  $\text{Mn}(\text{OAc})_3 \cdot 2\text{H}_2\text{O}$  (0.1 mmol),  $\text{NaOPiv}$  (0.1 mmol) in  $\text{MeOH}$  (1 mL) under air at  $100\text{ }^\circ\text{C}$  for 36 h. <sup>b</sup>Isolated yield.

### 1.3 Optimization of 6a reaction conditions

**Table S18.** Screening of ligands<sup>a</sup>

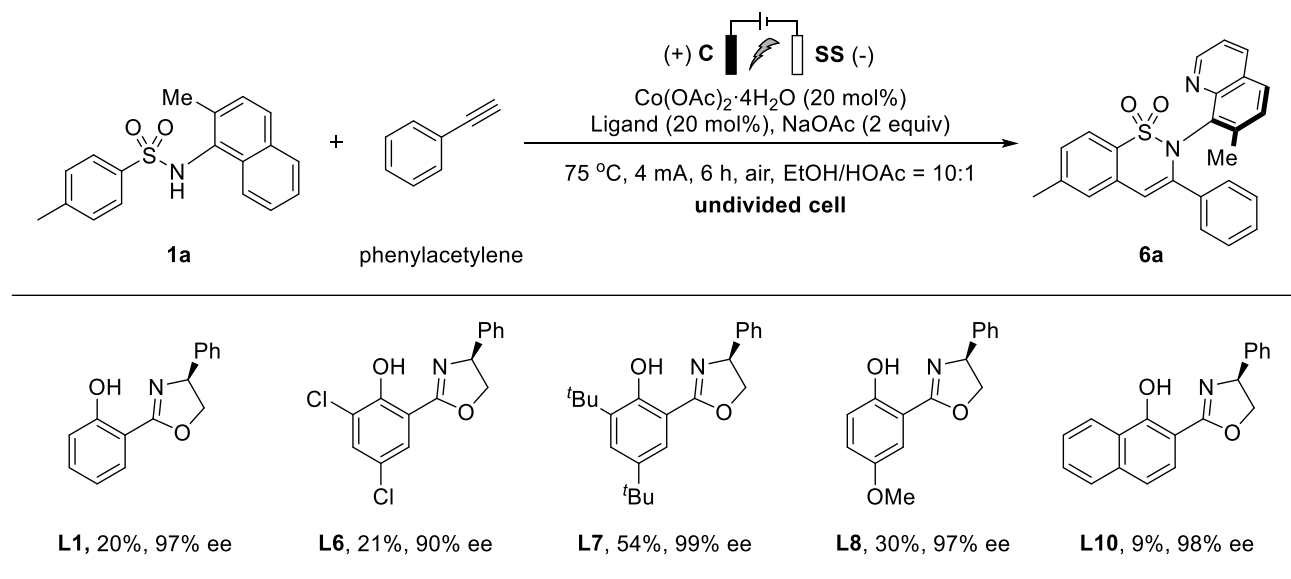

<sup>a</sup>Reaction conditions: Carbon cloth (15 mm × 20 mm × 0.33 mm) anode, stainless steel plate (15 mm × 20 mm × 1.0 mm) cathode, constant current = 4 mA, **1a** (0.25 mmol), phenylacetylene (0.5 mmol), Co(OAc)<sub>2</sub>·4H<sub>2</sub>O (20 mol%), ligand (20 mol%), EtOH (10.0 mL), HOAc (1.0 mL), NaOAc (2.0 equiv), 75 °C, 6 h, air, NMR yields. Enantiomeric excess was determined by chiral HPLC.

**Table S19.** Optimization of the reaction conditions for electronic synthesis<sup>a</sup>

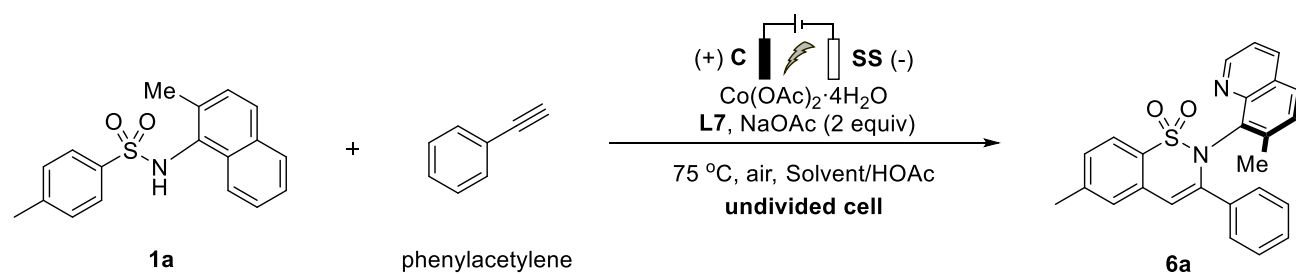

| Entry | solvent           | Constant current | Time | 6a (%) <sup>b</sup> | ee (%) |
|-------|-------------------|------------------|------|---------------------|--------|
| 1     | MeOH              | 4 mA             | 6 h  | 36                  | 96     |
| 2     | EtOH              | 4 mA             | 6 h  | 54                  | 99     |
| 3     | <sup>t</sup> BuOH | 4 mA             | 6 h  | trace               | --     |
| 4     | TFE               | 4 mA             | 6 h  | 10                  | 98     |
| 5     | HFIP              | 4 mA             | 6 h  | --                  | --     |
| 6     | EtOH              | 3 mA             | 6 h  | 59                  | 99     |
| 7     | EtOH              | 2 mA             | 6 h  | 65                  | 99     |

|                    |      |      |      |         |    |
|--------------------|------|------|------|---------|----|
| 8                  | EtOH | 1 mA | 6 h  | 72      | 99 |
| 9 <sup>c</sup>     | EtOH | 1 mA | 6 h  | 89      | 99 |
| 10 <sup>c</sup>    | EtOH | 1 mA | 2 h  | 30      | 99 |
| 11 <sup>c</sup>    | EtOH | 1 mA | 4 h  | 47      | 99 |
| 12 <sup>c</sup>    | EtOH | 1 mA | 8 h  | 97(91)  | 99 |
| 13 <sup>c</sup>    | EtOH | 1 mA | 10 h | >99(95) | 99 |
| 14 <sup>c, d</sup> | EtOH | 1 mA | 10 h | 77      | 99 |
| 15 <sup>c, e</sup> | EtOH | 1 mA | 10 h | 68      | 99 |
| 16 <sup>c</sup>    | EtOH | --   | 10 h | --      | -- |
| 17 <sup>c, f</sup> | EtOH | 1 mA | 10 h | --      | -- |

<sup>a</sup>Reaction conditions: Carbon cloth (15 mm × 20 mm × 0.33 mm) anode, stainless steel plate (15 mm × 20 mm × 1.0 mm) cathode, constant current, **1a** (0.25 mmol), phenylacetylene (0.5 mmol), Co(OAc)<sub>2</sub>·4H<sub>2</sub>O (20 mol%), **L7** (20 mol%), Solvent (10.0 mL), HOAc (1.0 mL), NaOAc (2.0 equiv), 75 °C, air, NMR yields. Enantiomeric excess was determined by chiral HPLC. <sup>b</sup>isolated yields. <sup>c</sup>EtOH (10.0 mL), HOAc (0.5 mL). <sup>d</sup>Co(OAc)<sub>2</sub>·4H<sub>2</sub>O (10 mol%), **L7** (20 mol%). <sup>e</sup>Co(OAc)<sub>2</sub>·4H<sub>2</sub>O (10 mol%), **L7** (10 mol%). <sup>f</sup>Without Co(OAc)<sub>2</sub>·4H<sub>2</sub>O and **L7** (20 mol%).

### Scheme S1. Control experiments.

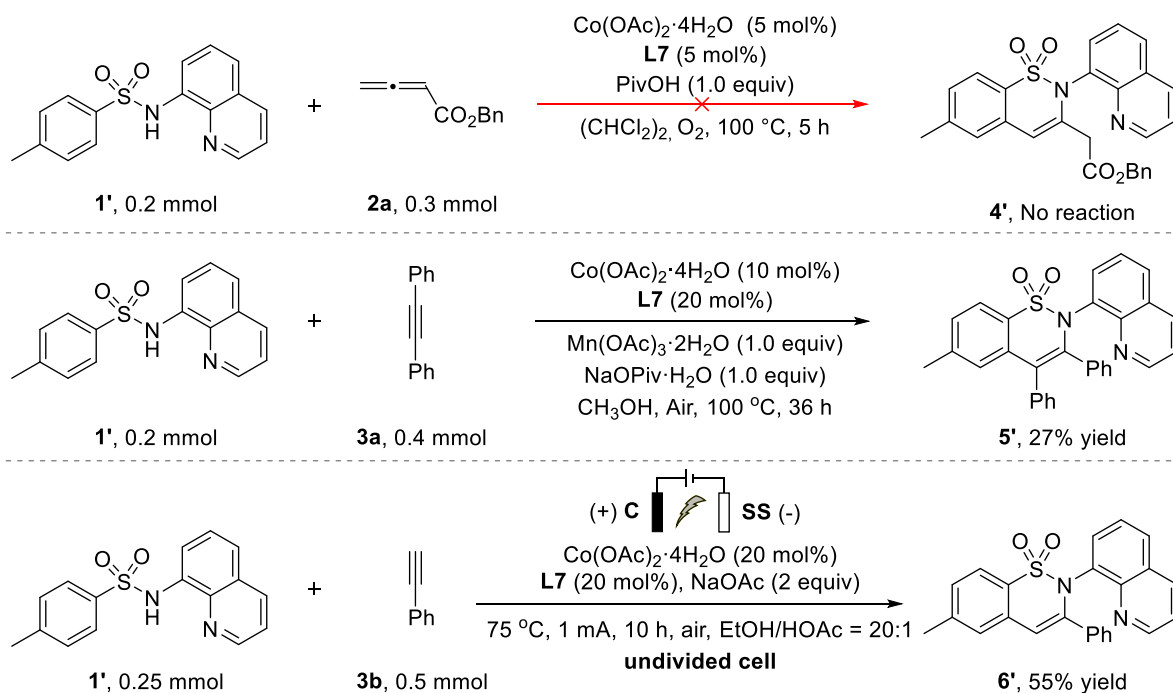

We choose the 8-aminoquinoline sulfonamide as the substrate in which the quinoline is not substituted ortho-position, and the annulations of sulfonamide with allenes or alkynes were conducted

under standard conditions. As a result, the annulation of sulfonamide with allene gave no product. The annulations of sulfonamide with alkyne deliver products **5'** and **6'** with low or moderate yields, and more importantly the products **5'** and **6'** has no axial chirality.

## 2. General procedure for the synthesis of **1**, **2**

7-substituted 8-aminoquinolines were synthesized according to literature procedures.<sup>1</sup> All sulfonamides were prepared according to the reported literature.<sup>2</sup>

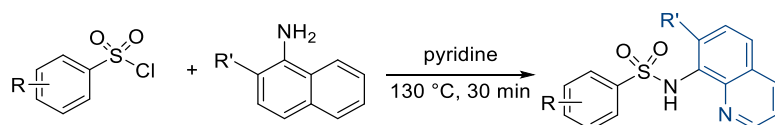

Allene substrates **2a-2f**, **2n** were synthesized according to reported literature methods.<sup>3</sup>

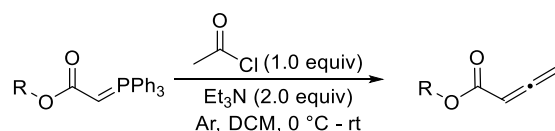

Allene substrates **2g-2k** were synthesized according to literature methods reported by Buono.<sup>4</sup>

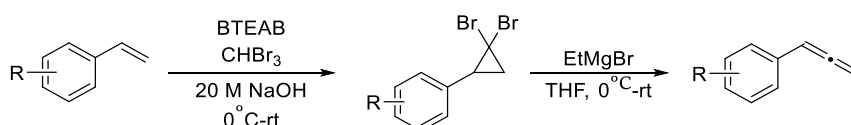

Allene substrate **2m** was synthesized according to literature methods.<sup>5</sup>

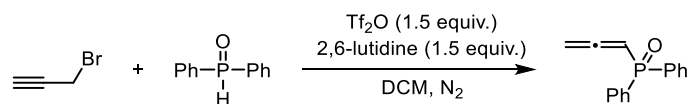

## 3. General procedure for synthesis of racemic samples **4**, **5** and **6**

### 3.1 General procedure for synthesis of racemic product **4**

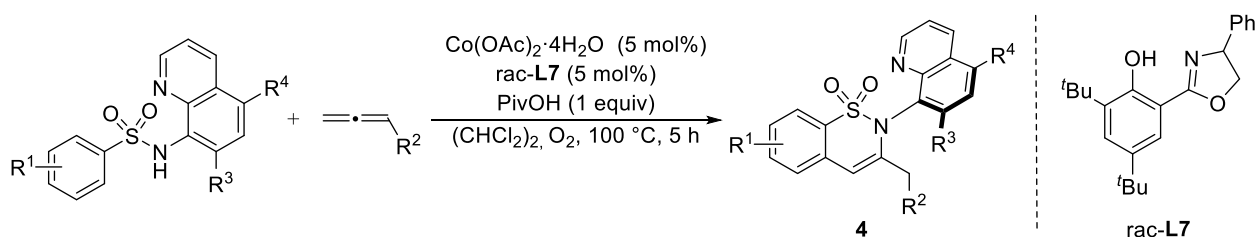

A dry 15 mL high-pressure tube with a stopcock was charged with a suitable magnet, benzenesulfonamide (0.05 mmol),  $\text{Co}(\text{OAc})_2 \cdot 4\text{H}_2\text{O}$  (5 mol%), racemic ligand (5 mol%), pivalic acid (0.05 mmol). 0.5 mL of 1,1,2,2-Tetrachloroethane solution and allene (0.075 mmol) was added under oxygen atmosphere. The closed high-pressure tube containing reaction mixture was placed in preheated metal bath at 100 °C for 5 hours. The reaction mixture was cooled to room temperature. The

mixture was quenched with saturated NaHCO<sub>3</sub> solution and extracted with CH<sub>2</sub>Cl<sub>2</sub> for three times. The combined organic phase was dried over MgSO<sub>4</sub>, and filtered. Then the solvent was evaporated. Product was purified using column chromatography on silica gel using appropriate eluent.

### 3.2 General procedure for synthesis of racemic product 5 or 6

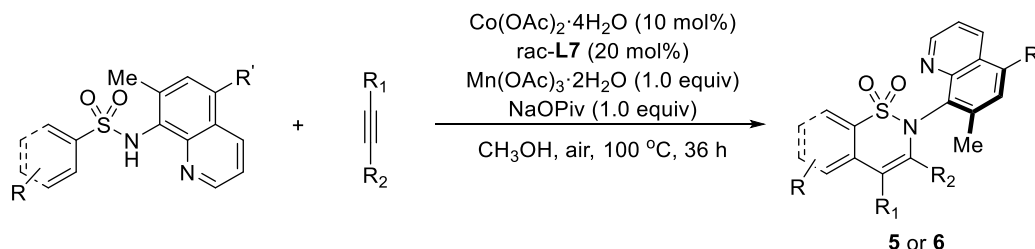

Sulfonamides **1a** (0.1 mmol), alkynes **3a** (0.2 mmol), Co(OAc)<sub>2</sub>·4H<sub>2</sub>O (0.01 mmol), rac-L7 (10 mol%), Mn(OAc)<sub>3</sub>·2H<sub>2</sub>O (0.1 mmol), NaOPiv (0.1 mmol), anhydrous solvent methanol (1.0 mL) was added successively to a dry 15 mL high-pressure tube containing a magnetic stir bar under air. The closed high-pressure tube containing reaction mixture was placed in preheated metal bath at 100 °C for 36 hours. After the reaction was completed, the reaction mixture was cooled to room temperature, quenched by saturated aqueous Na<sub>2</sub>CO<sub>3</sub>, and extracted with CH<sub>2</sub>Cl<sub>2</sub>. The organic layer was dried over anhydrous Na<sub>2</sub>SO<sub>4</sub> and concentrated in vacuo. The products were purified by preparative TLC.

## 4. General procedure for synthesis of enantioenriched compounds 4, 5 and 6

### 4.1 General procedure for synthesis of enantioenriched compounds 4

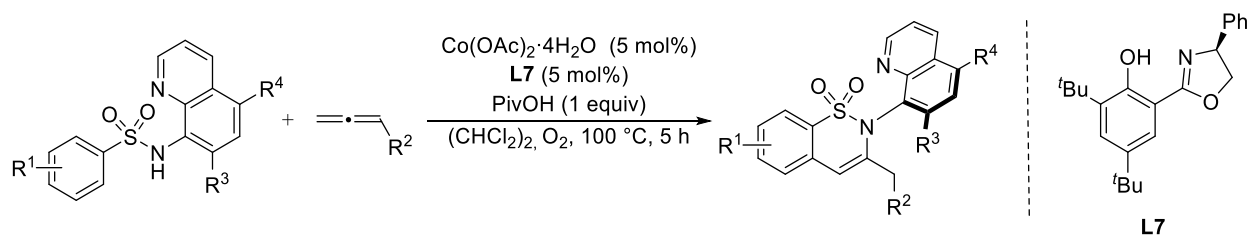

A dry 15 mL high-pressure tube with a stopcock was charged with a suitable magnet, benzenesulfonamide (0.2 mmol), Co(OAc)<sub>2</sub>·4H<sub>2</sub>O (5 mol%), chiral ligand (5 mol%), pivalic acid (0.2 mmol). 2 mL of 1,1,2,2-Tetrachloroethane solution and allene (0.3 mmol) was added under oxygen atmosphere. The closed high-pressure tube containing reaction mixture was placed in preheated metal bath at 100 °C for 5 hours. The reaction mixture was cooled to room temperature. The mixture was quenched with saturated NaHCO<sub>3</sub> solution and extracted with CH<sub>2</sub>Cl<sub>2</sub> for three times. The combined organic phase was dried over MgSO<sub>4</sub>, and filtered. The reaction solution was concentrated in vacuum and purified by flash column chromatography to give the product.



## 4.2 General procedure for synthesis of enantioenriched compounds 5

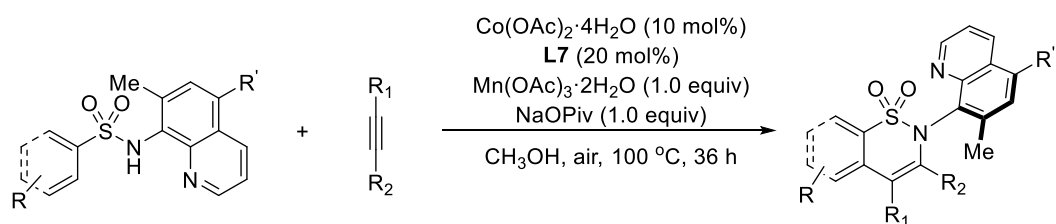

Sulfonamides **1a** (0.2 mmol), alkynes **3a** (0.40 mmol),  $Co(OAc)_2 \cdot 4H_2O$  (0.02 mmol), **L7** (20 mol%),  $Mn(OAc)_3 \cdot 2H_2O$  (0.2 mmol), NaOPiv (0.2 mmol), anhydrous solvent methanol (2.0 mL) was added successively to a dry 15 mL high-pressure tube containing a magnetic stir bar under air. The closed high-pressure tube containing reaction mixture were placed in preheated metal bath at  $100\text{ }^\circ C$  for 36 hours. After the reaction was completed, the reaction mixture was cooled to room temperature, quenched by saturated aqueous  $Na_2CO_3$ , and extracted with  $CH_2Cl_2$ . The organic layer was dried over anhydrous  $Na_2SO_4$  and concentrated in vacuo. The products were purified by preparative TLC.

## 4.3 General procedure for synthesis of enantioenriched compounds 6

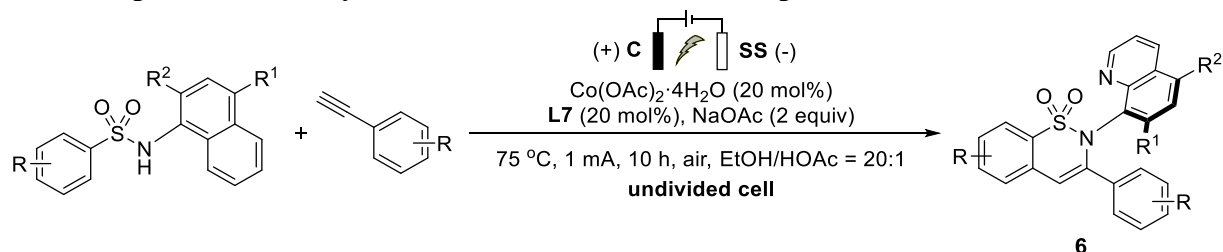

A 30 mL sample bottle was equipped with a magnetic stir bar and charged with sulfonamide **1** (0.25 mmol),  $Co(OAc)_2 \cdot 4H_2O$  (20 mol%), **L7** (20 mol%), alkyne (0.5 mmol), anhydrous ethanol (10.0 mL) and HOAc (0.5 mL). The bottle was equipped with carbon cloths ( $15\text{ mm} \times 20\text{ mm} \times 0.33\text{ mm}$ ) as the anodes and stainless steel plates ( $15\text{ mm} \times 20\text{ mm} \times 1\text{ mm}$ ) as the cathodes, under air conditions (open to air by two thick syringe needles). The reaction mixture was stirred and electrolyzed at a constant current of 1 mA at  $75\text{ }^\circ C$  for 10 h. After the completion of the reaction, the solvent is removed under reduced pressure, and saturated  $NaHCO_3$  is added and extracted with DCM. The organic phase is combined, dried, filtered, and concentrated in *vacuum*. The crude mixture was purified by preparative TLC using (DCM/PE = 5/1) as eluent, affording the final product **6**.

## 5. Mechanistic studies

### 5.1 H/D exchange experiments

### 5.1.1 H/D exchange experiments of 4aa

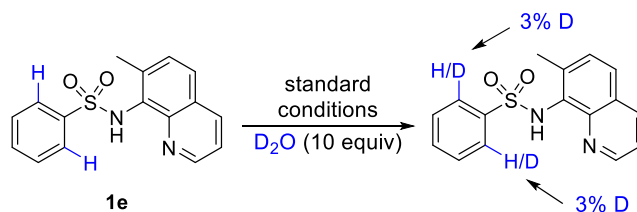

A dry 15 mL high-pressure tube with a stopcock was charged with a suitable magnet, **1e** (0.1 mmol),  $Co(OAc)_2 \cdot 4H_2O$  (5 mol%), **L7** (5 mol%), pivalic acid (0.1 mmol). 1,1,2,2-Tetrachloroethane solution and  $D_2O$  (10 equiv) was added under oxygen atmosphere. The closed high-pressure tube containing reaction mixture was placed in preheated metal bath at 100 °C for 5 hours. The reaction mixture was cooled to room temperature. The mixture was quenched with saturated  $NaHCO_3$  solution and extracted with  $CH_2Cl_2$  for three times. The combined organic phase was dried over  $MgSO_4$ , and filtered. The reaction solution was concentrated in vacuum and purified by flash column chromatography to give the product. The product was purified by flash column chromatography using PE/EA (6:1) as eluent.  $^1H$  NMR analysis showed that the D contents in the recovered amide was 6%.

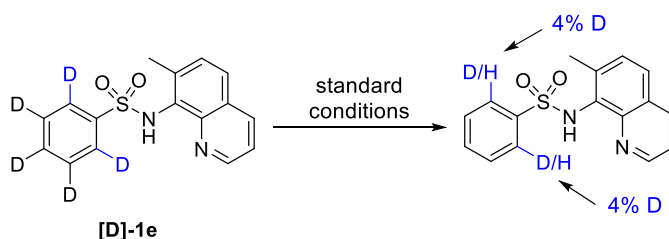

A dry 15 mL high-pressure tube with a stopcock was charged with a suitable magnet, **[D]-1e** (0.1 mmol),  $Co(OAc)_2 \cdot 4H_2O$  (5 mol%), **L7** (5 mol%), pivalic acid (0.1 mmol). 1,1,2,2-Tetrachloroethane solution was added under oxygen atmosphere. The closed high-pressure tube containing reaction mixture was placed in preheated metal bath at 100 °C for 5 hours. The reaction mixture was cooled to room temperature. The mixture was quenched with saturated  $NaHCO_3$  solution and extracted with  $CH_2Cl_2$  for three times. The combined organic phase was dried over  $MgSO_4$ , and filtered. The reaction solution was concentrated in vacuum and purified by flash column chromatography to give the product. The product was purified by flash column chromatography using PE/EA (6:1) as eluent.  $^1H$  NMR analysis showed that the D contents in the recovered amide was 8%.

### 5.1.2 H/D exchange experiments of 5aa

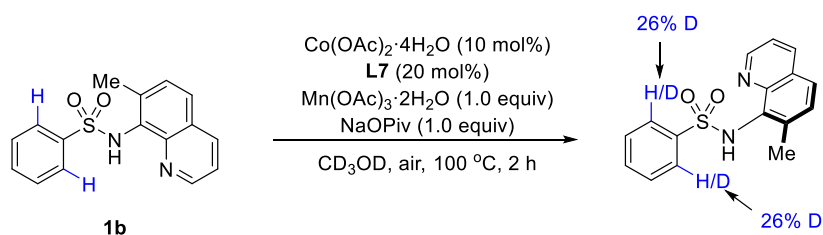

A 10 mL dry high-pressure tube was equipped with a magnetic stir bar and charged with sulfonamide **1e** (0.1 mmol),  $\text{Co}(\text{OAc})_2 \cdot 4\text{H}_2\text{O}$  (0.01 mmol), **L7** (20 mol%),  $\text{Mn}(\text{OAc})_3 \cdot 2\text{H}_2\text{O}$  (1.0 equiv), NaOPiv (1.0 equiv), and anhydrous solvent  $\text{CD}_3\text{OD}$  (1.0 mL) under air. Then the reaction system was closed with a stopper. The container was stirred at 100 °C for 2 h. After the reaction was completed, the reaction mixture was diluted with 25 mL of  $\text{CH}_2\text{Cl}_2$  and filtered through a pad of celite. The reaction solution was detected by TLC, and then concentrated in vacuum. The product was purified by flash column chromatography using PE/EA (1:1) as eluent.  $^1\text{H}$  NMR analysis showed that the D contents in the recovered amide was 26%.

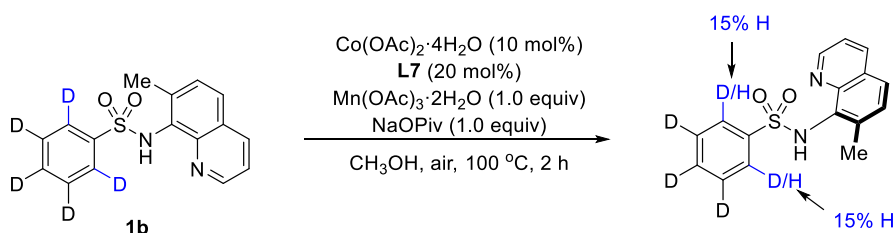

A 10 mL dry high-pressure tube was equipped with a magnetic stir bar and charged with sulfonamide **[D]-1e** (0.1 mmol),  $\text{Co}(\text{OAc})_2 \cdot 4\text{H}_2\text{O}$  (0.01 mmol), **L7** (20 mol%),  $\text{Mn}(\text{OAc})_3 \cdot 2\text{H}_2\text{O}$  (1.0 equiv), NaOPiv (1.0 equiv), and anhydrous solvent  $\text{CH}_3\text{OH}$  (1.0 mL) under air. Then the reaction system was closed with a stopper. The container was stirred at 100 °C for 2 h. After the reaction was completed, the reaction mixture was diluted with 25 mL of  $\text{CH}_2\text{Cl}_2$  and filtered through a pad of celite. The reaction solution was detected by TLC, and then concentrated in vacuum. The product was purified by flash column chromatography using PE/EA (1:1) as eluent.  $^1\text{H}$  NMR analysis showed that the H contents in the recovered amide was 15%.

### 5.2 Parallel KIE experiments

### 5.2.1 Parallel KIE experiments of 4ea

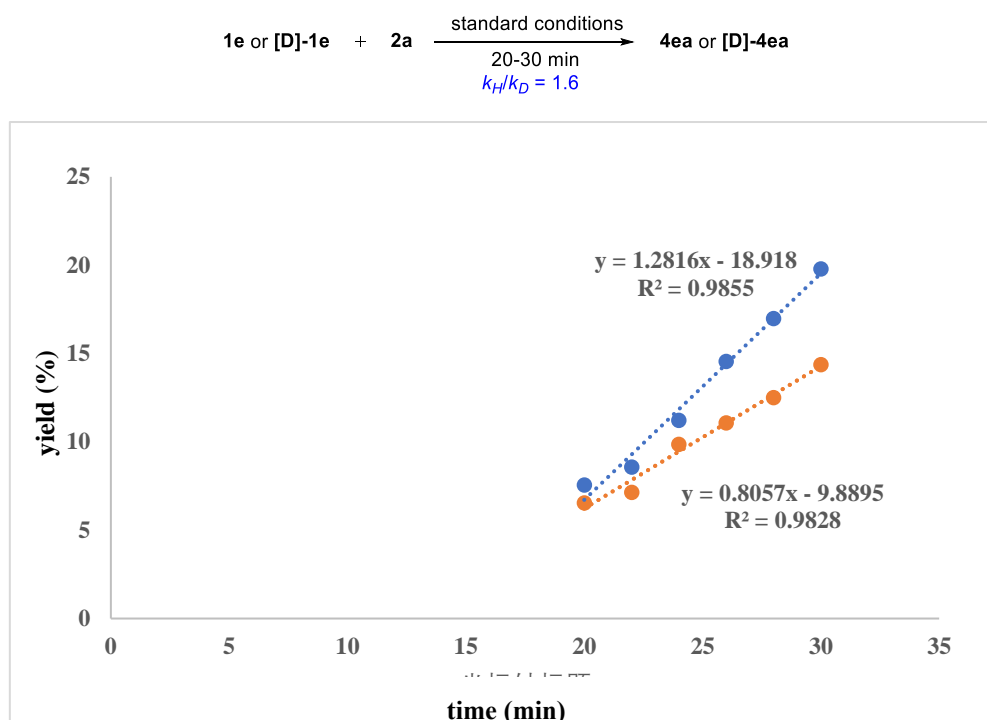

**Figure S1.** Parallel KIE experiments

A dry 25 mL high-pressure tube with a stopcock was charged with a suitable magnet, **[D]-1e** or **1e** (0.1 mmol),  $\text{Co}(\text{OAc})_2 \cdot 4\text{H}_2\text{O}$  (5 mol%), **L7** (5 mol%), pivalic acid (0.1 mmol). 1,1,2,2-Tetrachloroethane solution and allene (0.15 mmol) was added under oxygen atmosphere. Then, the reaction system was stirred at 100 °C for 20 min, 22 min, 24 min, 26 min, 28 min, 30 min. After the reaction was completed, and immediately quenched with ethyl acetate. and filtered through a pad of celite. The reaction solution was removed under reduced pressure and  $^1\text{H}$  NMR was taken using anisole (0.1 mmol, 10.8 mg) as the internal standard. The KIE was determined as  $k_H/k_D = 1.2806/0.8057 = 1.6$ .

### 5.2.2 Competitive KIE experiments of 4ea

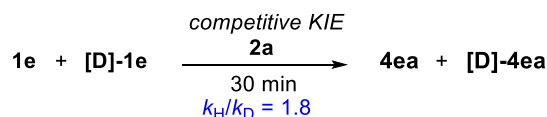

A dry 25 mL high-pressure tube with a stopcock was charged with a suitable magnet, **[D]-1e** and **1e** (0.1 mmol),  $\text{Co}(\text{OAc})_2 \cdot 4\text{H}_2\text{O}$  (5 mol%), **L7** (5 mol%), pivalic acid (0.1 mmol). 1,1,2,2-Tetrachloroethane solution and allene (0.15 mmol) was added under oxygen atmosphere. Then, the reaction system was stirred at 100 °C for 30 min. After the reaction was completed, and immediately quenched with ethyl acetate. and filtered through a pad of celite. The reaction solution was removed

under reduced pressure and  $^1\text{H}$  NMR was taken using anisole (0.1 mmol, 10.8 mg) as the internal standard. The KIE was determined as  $k_H/k_D = 0.6441/0.3559 = 1.8$ .

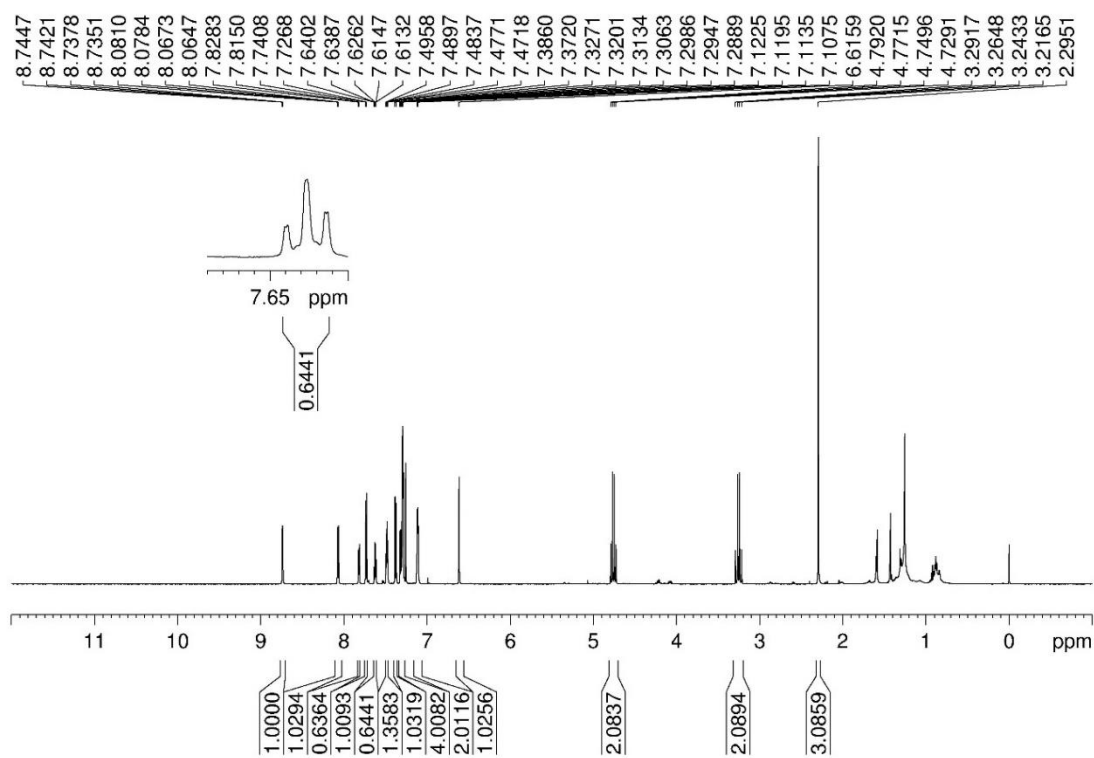

### 5.2.3 Parallel KIE experiments of 5ea

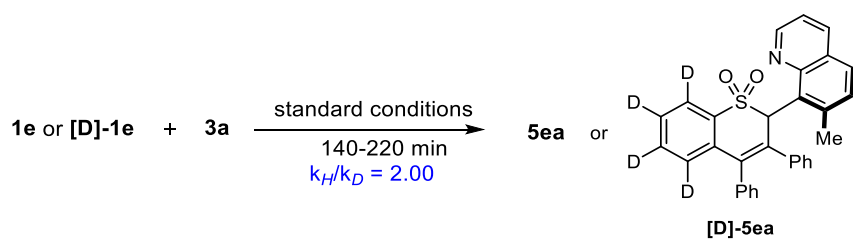

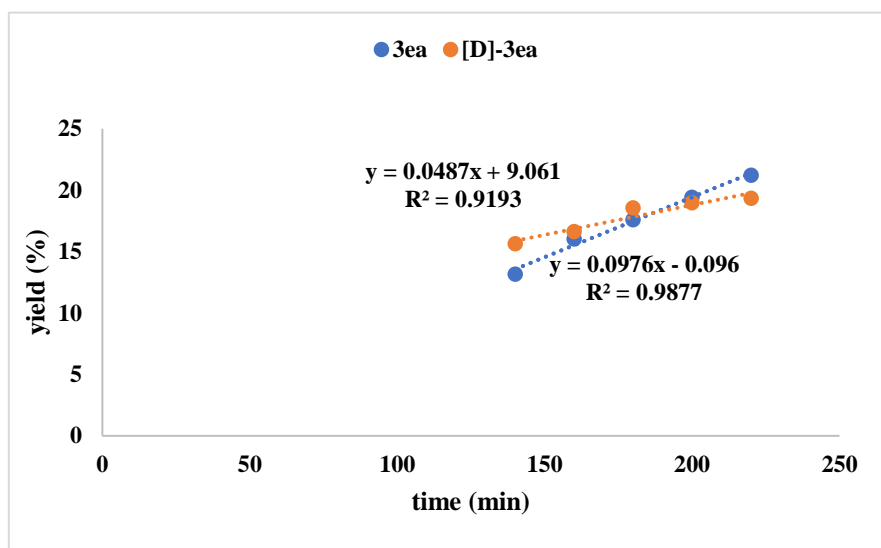

**Figure S2.** Parallel KIE experiments

A 10 mL dry high-pressure tube was equipped with a magnetic stir bar and charged with sulfonamide **1e** (0.1 mmol) or [D]-**1e** (0.1 mmol),  $\text{Co}(\text{OAc})_2 \cdot 4\text{H}_2\text{O}$  (0.01 mmol),  $\text{Mn}(\text{OAc})_3 \cdot 2\text{H}_2\text{O}$  (1.0 equiv), NaOPiv (1.0 equiv), and anhydrous solvent  $\text{CH}_3\text{OH}$  (1.0 mL) under air. Then, the reaction system was closed with a stopper. The vessel was heated at 100 °C for 140 min, 160 min, 180 min, 200 min, 220 min and immediately quenched with  $\text{CH}_2\text{Cl}_2$ . The reaction mixture was filtered through a pad of celite. The solvent was then removed under reduced pressure and  $^1\text{H}$  NMR was taken using anisole (0.1 mmol, 10.8 mg) as the internal standard. The KIE was determined as  $k_H/k_D = 0.0976/0.0487 = 2.00$ .

### 5.3 Deuteryl labeling experiment

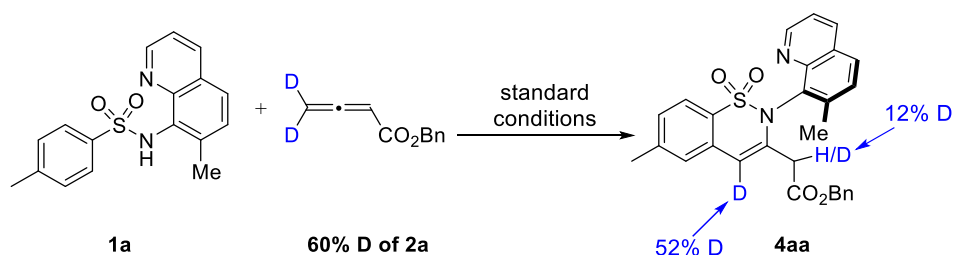

The prepared deuterodiene was involved in the reaction under standard conditions. After the reaction, the products were separated by column chromatography and detected by  $^1\text{H}$ NMR. The results showed that 23% of the methylene associated with the olefin was deuterated, suggesting that some of the olefin products in the ring may have been obtained through 1,3- hydrogen migration.

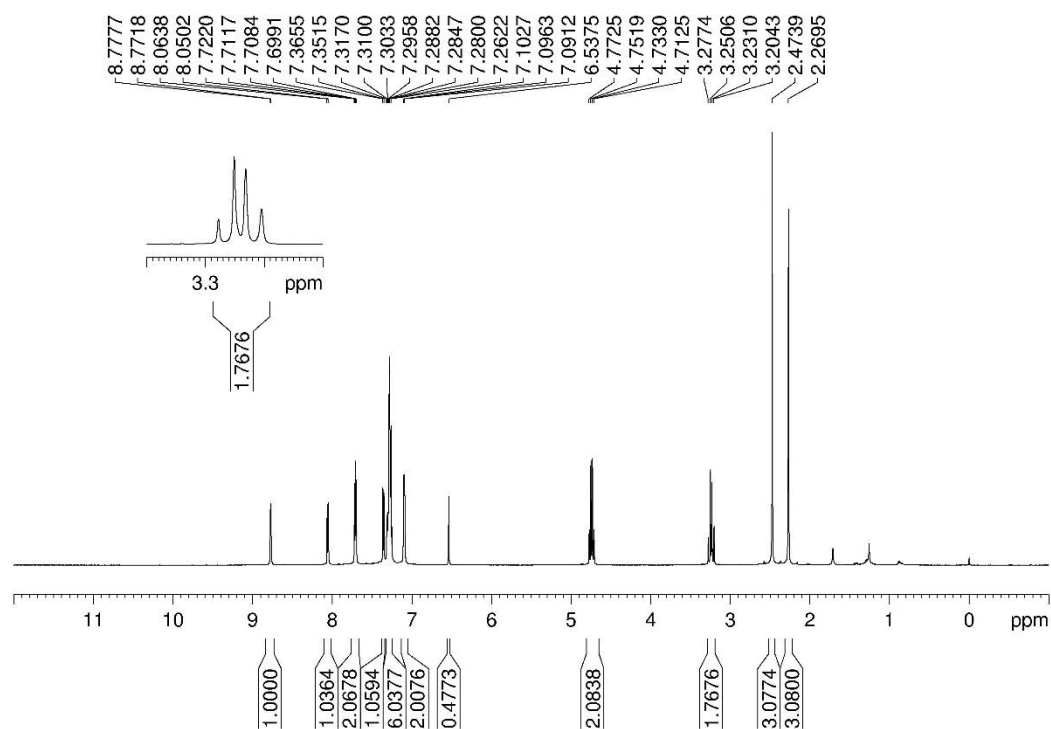

#### 5.4 Nonlinear effect study of 4aa with L7

The factors influencing the selectivity of enantiomers were studied. The catalysts with different ee values were prepared by mixing the chiral ligand L7 with the racemic ligand in appropriate proportions. The product was separated by column chromatography and the ee value of the product was determined by HPLC. The results showed that the ee value of the product had a linear relationship with that of the corresponding catalyst.

|                |   |    |    |    |    |    |
|----------------|---|----|----|----|----|----|
| Ligand ee (%)  | 0 | 21 | 40 | 63 | 80 | 99 |
| Product ee (%) | 0 | 19 | 36 | 70 | 72 | 93 |

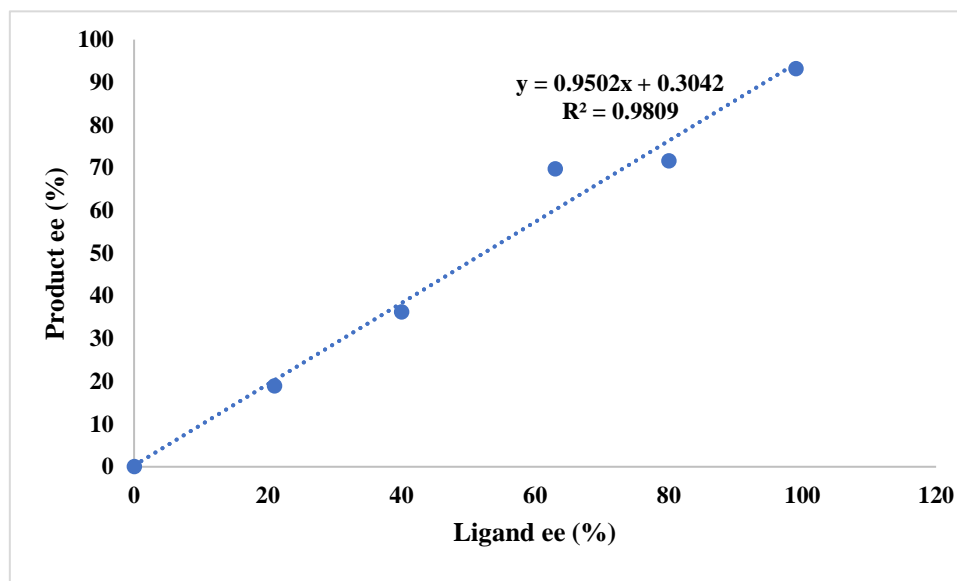

**Figure S3.** Corresponding ee relationship between ligand and product.

## 6. Synthetic application

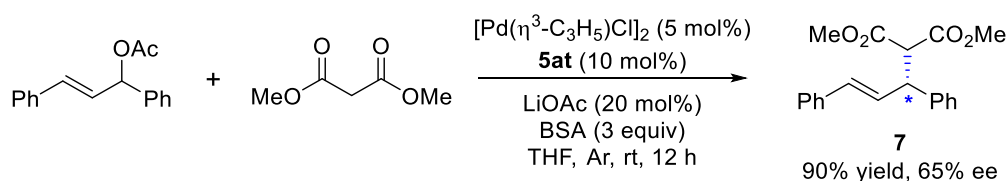

$[\text{Pd}(\eta^3\text{-C}_3\text{H}_5)\text{Cl}]_2$  (0.005 mmol, 5 mol%), LiOAc (0.02 mmol, 20 mol%) was added dropwise to a solution of **5at** (0.01 mmol, 10 mol%) in THF (0.4 mL) and the mixture was stirred under argon at room temperature for 30 min. Then 1,3-diphenyl-2-propenyl acetate (0.1 mmol, 1.0 equiv), dimethyl malonate (0.3 mmol, 3.0 equiv), *N,O*-bis(trimethylsilyl)-acetamide (BSA) (0.3 mmol, 3.0 equiv) were added subsequently, and the reaction mixture was stirred at room temperature for 12 h until the reaction was completed. The reaction mixture was quenched with  $\text{NH}_4\text{Cl}$  aqueous solution and extracted with  $\text{CH}_2\text{Cl}_2$ . The combined organic layer extracts were washed with brine, dried over  $\text{Na}_2\text{SO}_4$ , and concentrated under reduced pressure, and purified on silica gel chromatography (hexanes/ethyl acetate = 20:1) to afford the corresponding product.

### Dimethyl (*R,E*)-2-(1,3-diphenylallyl)malonate (**7**).

Yield: 29.2 mg (90%). Colorless oil. The product was analyzed by HPLC to determine the enantiomeric excess: 65% ee (CHIRALPAK AD-H, hexane/*i*-



PrOH =90/10, detector: 254 nm, T = 25 °C, flow rate: 1 mL/min), t<sub>1</sub> (major) = 11.20 min, t<sub>2</sub> (minor) = 15.82.34 min.

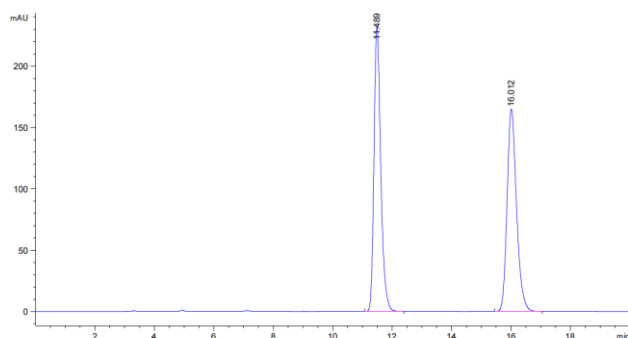

| Peak | RetTime | Area       | Height    | Area    |
|------|---------|------------|-----------|---------|
| 1    | 11.489  | 3651.54028 | 231.72360 | 50.0657 |
| 2    | 16.012  | 3641.95410 | 164.89719 | 49.9343 |

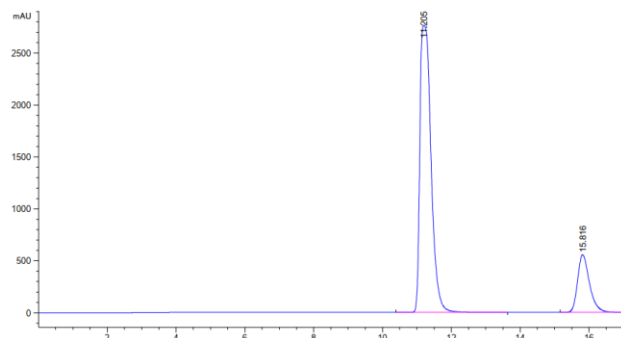

| Peak | RetTime | Area      | Height     | Area    |
|------|---------|-----------|------------|---------|
| 1    | 11.205  | 6.20244e4 | 2764.18799 | 82.3059 |
| 2    | 15.816  | 1.33340e4 | 555.65076  | 17.6941 |

## 7. Gram scale

### 7.1 Gram scale experiment of 4aa

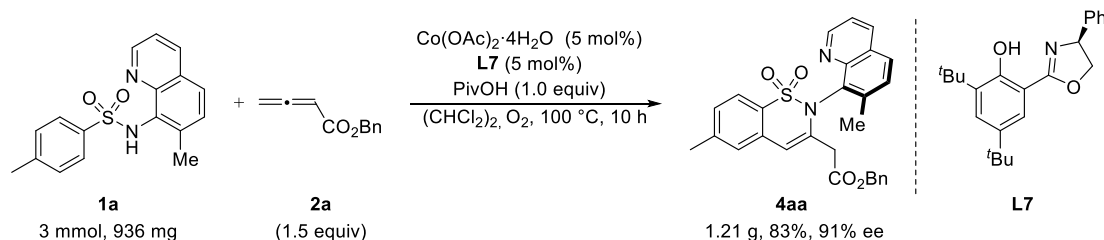

A 100 mL oven-dried Schlenk bottle was equipped with a magnetic stir bar and charged with benzenesulfonamide **1a** (936 mg, 3 mmol), allene **2a** (783 mg, 4.5 mmol),  $\text{Co}(\text{OAc})_2 \cdot 4\text{H}_2\text{O}$  (52.5 mg, 0.15 mmol), **L7** (39 mg, 0.15 mmol), anhydrous solvent 1,1,2,2-Tetrachloroethane (30.0 mL) under the oxygen atmosphere. Then, the reaction system was closed with a Rubber plug. The container was stirred at 100 °C for 10 h. The reaction mixture was cooled to room temperature. The mixture was quenched with saturated  $\text{NaHCO}_3$  solution and extracted with  $\text{CH}_2\text{Cl}_2$  for three times. The combined organic phase was dried over  $\text{MgSO}_4$ , and filtered. The reaction solution was detected by TLC, and then concentrated in vacuum. The product was purified by flash column chromatography using (PE/EA = 3/1) as eluent, affording the final product **4aa** (white powdery solid, 1.21 g, 83% yield, 94% ee).

### 7.2 Gram scale experiment of 5aa

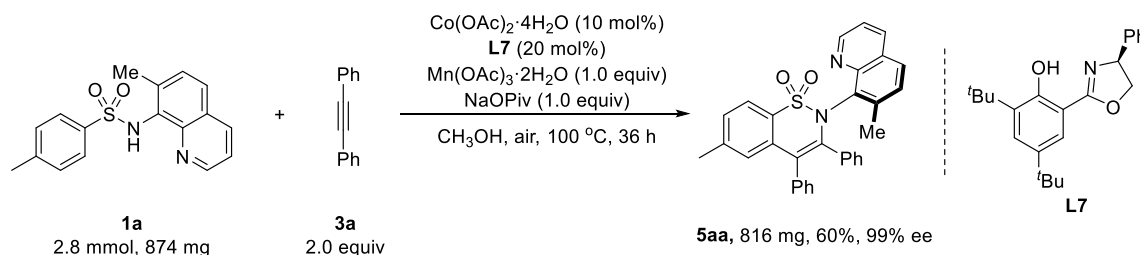

A 250 mL dry high-pressure tube charged with magnetic stirrer added sulfonamide (2.8 mmol), alkyne (5.6 mmol),  $\text{Co(OAc)}_2 \cdot 4\text{H}_2\text{O}$  (10 mol%), **L7** (20 mol%),  $\text{Mn(OAc)}_3 \cdot 2\text{H}_2\text{O}$  (1.0 equiv),  $\text{NaOPiv} \cdot \text{H}_2\text{O}$  (1.0 equiv), and  $\text{CH}_3\text{OH}$  (28 mL). The reaction mixture was heated at 100 °C for 36 h. After the reaction was completed, the reaction mixture was cooled to room temperature, quenched by saturated aqueous  $\text{Na}_2\text{CO}_3$ , and extracted with  $\text{CH}_2\text{Cl}_2$ . The organic layer was dried over anhydrous  $\text{Na}_2\text{SO}_4$  and concentrated in vacuo. Then the mixture was subjected to column chromatography on silica gel (PE/EtOAc = 10:1) to give the desired product **5aa** (816 mg) in 60% yield as a white solid with 99% ee.

### 7.3 Gram scale experiment of 6a

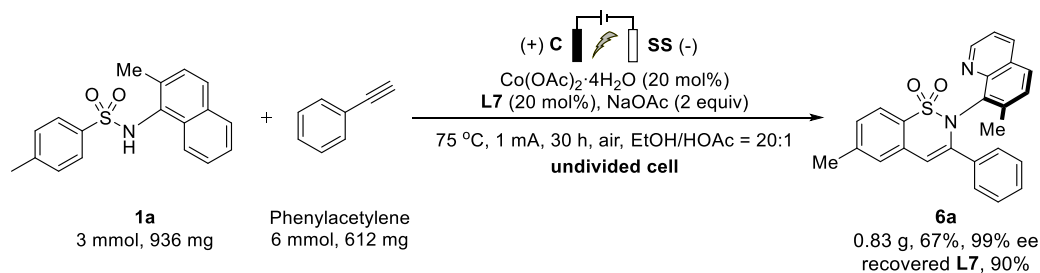

A 250 mL oven-dried three-necked bottle was equipped with a magnetic stir bar and charged with sulfonamide **1a** (936 mg, 3 mmol),  $\text{Co(OAc)}_2 \cdot 4\text{H}_2\text{O}$  (149.4 mg, 0.6 mmol), **L7** (210.7 mg, 0.6 mmol), phenylacetylene (612 mg, 6 mmol), anhydrous ethanol (100.0 mL) and HOAc (5 mL). The bottle was equipped with two carbon cloths (20 mm × 30 mm × 0.33 mm) as the anodes and two stainless steel plates (20 mm × 30 mm × 1 mm) as the cathodes, under air conditions (open to air by two thick syringe needles). The reaction mixture was strong stirred and electrolyzed at a constant current of 1 mA at 75 °C for 30 h. After the completion of the reaction, the solvent is removed under reduced pressure, saturated  $\text{NaHCO}_3$  is added and extracted with DCM, the organic phase is combined, dried, filtered, and concentrated in *vacuum*. The crude mixture was purified by flash column chromatography using (DCM/PE = 5/1) as eluent, affording the final product **6a** (white solid, 0.83 g, 67% yield, 99% ee). We also recovered 191.0 mg of chiral ligand **L7** (90% yield).

## 8. Study on product stability

The enantiomerization barrier, corresponding to the barrier to rotation for the following atropisomers, was obtained by kinetic of racemization of an enantiomer. The slope of the first order kinetic line gives the racemization constant ( $k_{\text{racemization}} = 2 \times k_{\text{enantiomerization}}$ ). According to the Eyring equation, the enantiomerization barrier ( $\Delta G^{\ddagger}_{\text{enantiomerization}}$ ) can be obtained from enantiomerization constant ( $k_{\text{enantiomerization}}$ ),  $R = 8.31451 \text{ J}\cdot\text{K}^{-1}\cdot\text{mol}^{-1}$ ,  $h = 6.62608 \times 10^{-34} \text{ J}\cdot\text{s}$  and  $k_B = 1.38066 \times 10^{-23} \text{ J}\cdot\text{K}^{-1}$ .

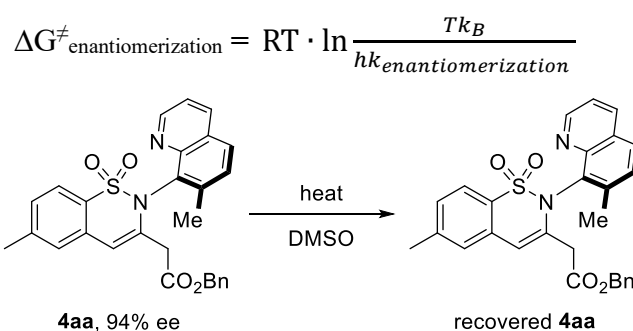

A solution of (*R*)-**4aa** (10.0 mg, 94% ee) in DMSO (1 mL) was heated at the specific temperatures.

The ee value was determined by chiral HPLC analysis at different intervals.

**Table S20.** Thermal racemization of product **4aa**

| Temp.(°C) | Time (h) |        |        |        |        |        |        |
|-----------|----------|--------|--------|--------|--------|--------|--------|
|           | 1        | 2      | 4      | 6      | 8      | 10     | 12     |
| 100       | 93.246   | 93.0   | 92.970 | 93.06  | 92.322 | 92.110 | 91.014 |
| 120       | 93.678   | 92.728 | 92.346 | 91.5   | 91.278 | 90.942 | 89.000 |
| 130       | 93.118   | 91.88  | 89.974 | 88.292 | 87.266 | 85.778 | 83.118 |

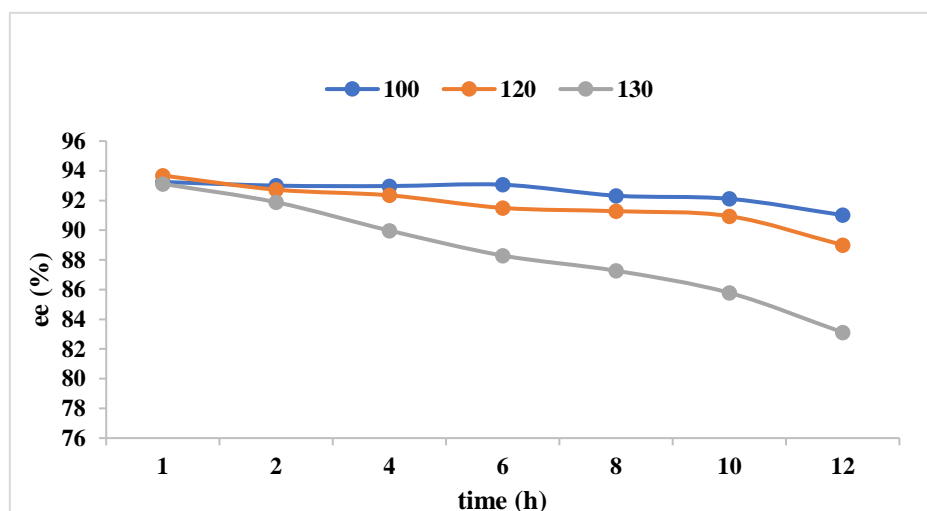

**Figure S4.** The ee value of **4aa** vs time at different temperature in DMSO

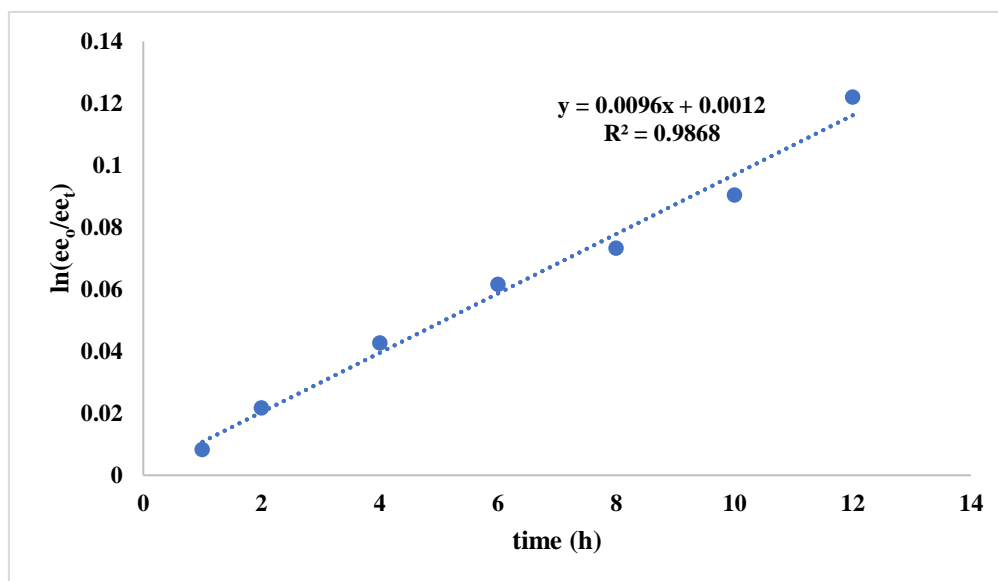

**Figure S5.** The plot of  $\ln(ee_0/ee_t)$  vs time of **4aa** at 130 °C

$$k_{\text{racemization}} (130\text{ }^\circ\text{C}) = 0.00936\text{ h}^{-1} = 2.6 \times 10^{-6}\text{ s}^{-1}$$

$$k_{\text{enantiomerization}} (130\text{ }^\circ\text{C}) = 1.3 \times 10^{-6}\text{ s}^{-1}$$

$$\Delta G^\ddagger_{\text{enantiomerization}} = 145.10\text{ kJ/mol} = 34.68\text{ kcal/mol}$$

$$t_{1/2} (25\text{ }^\circ\text{C}) = 4.7 \times 10^4\text{ years}$$

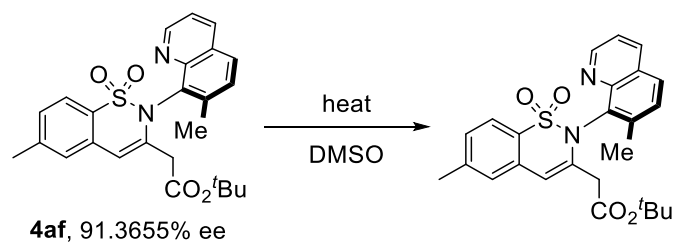

A solution of (*R*)-**4af** (10.0 mg, 94% ee) in DMSO (1 mL) was heated at the specific temperatures.

The ee value was determined by chiral HPLC analysis at different intervals.

**Table S21.** Thermal racemization of product **4af**

| Temp.(°C) | Time (h) |        |        |        |        |        |        |
|-----------|----------|--------|--------|--------|--------|--------|--------|
|           | 1        | 2      | 4      | 6      | 8      | 10     | 12     |
| 130       | 89.542   | 88.156 | 86.814 | 85.044 | 83.422 | 81.408 | 80.568 |

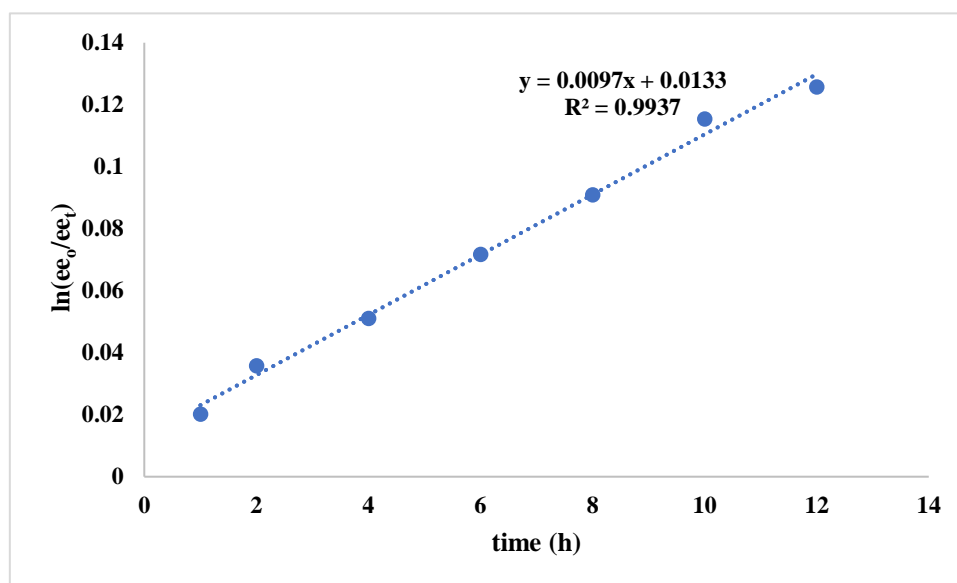

**Figure S6.** The plot of  $\ln(ee_0/ee_t)$  vs time of **4af** at 130 °C

$$k_{\text{racemization}} (130\text{ }^\circ\text{C}) = 0.01008\text{ h}^{-1} = 2.8 \times 10^{-6}\text{ s}^{-1}$$

$$k_{\text{enantiomerization}} (130\text{ }^\circ\text{C}) = 1.4 \times 10^{-6}\text{ s}^{-1}$$

$$\Delta G^\ddagger_{\text{enantiomerization}} = 145.00\text{ kJ/mol} = 34.68\text{ kcal/mol}$$

$$t_{1/2} (25\text{ }^\circ\text{C}) = 4.7 \times 10^4\text{ years}$$

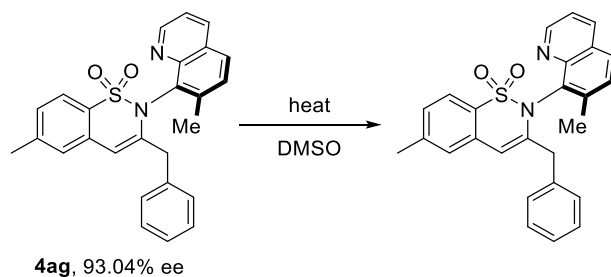

A solution of (*R*)-**4ag** (10.0 mg, 94% ee) in DMSO (1 mL) was heated at the specific temperatures. The ee value was determined by chiral HPLC analysis at different intervals.

**Table S22.** Thermal racemization of product **4ag**

| Temp.(°C) \ Time (h) | Time (h) |        |        |        |        |        |        |
|----------------------|----------|--------|--------|--------|--------|--------|--------|
|                      | 1        | 2      | 4      | 6      | 8      | 10     | 12     |
| 130                  | 93.002   | 92.044 | 90.362 | 88.472 | 88.492 | 87.588 | 85.106 |

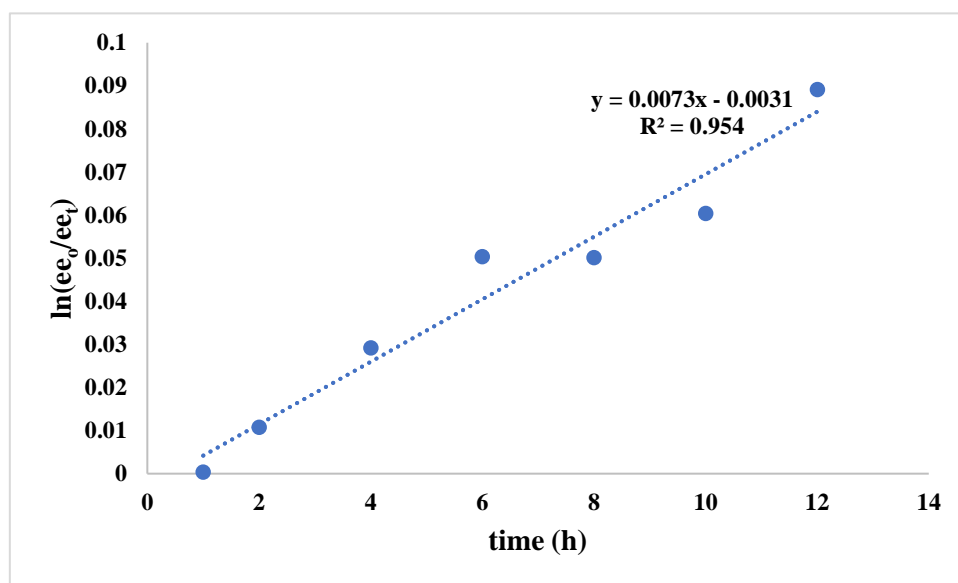

**Figure S7.** The plot of  $\ln(ee_0/ee_t)$  vs time of **4ag** at 130 °C

$$k_{\text{racemization}} (130 \text{ } ^\circ\text{C}) = 0.0072 \text{ h}^{-1} = 2.0 \times 10^{-6} \text{ s}^{-1}$$

$$k_{\text{enantiomerization}} (130 \text{ } ^\circ\text{C}) = 1.0 \times 10^{-6} \text{ s}^{-1}$$

$$\Delta G^\ddagger_{\text{enantiomerization}} = 146.02 \text{ kJ/mol} = 34.90 \text{ kcal/mol}$$

$$t_{1/2} (25 \text{ } ^\circ\text{C}) = 6.3 \times 10^4 \text{ years}$$

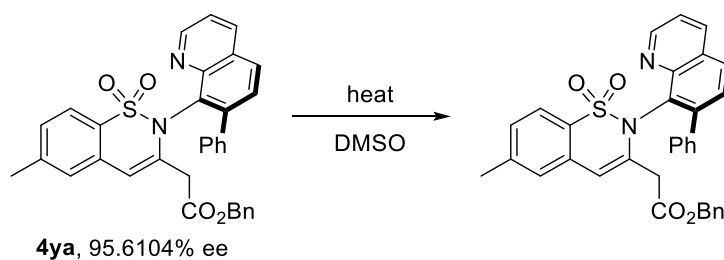

A solution of (*R*)-**4ya** (10.0 mg, 94% ee) in DMSO (1 mL) was heated at the specific temperatures.

The ee value was determined by chiral HPLC analysis at different intervals.

**Table S23.** Thermal racemization of product **4ya**

| Temp.(°C) | Time (h) |        |        |        |        |        |        |
|-----------|----------|--------|--------|--------|--------|--------|--------|
|           | 1        | 2      | 4      | 6      | 8      | 10     | 12     |
| 130       | 92.152   | 91.364 | 88.384 | 86.200 | 83.640 | 81.540 | 79.202 |

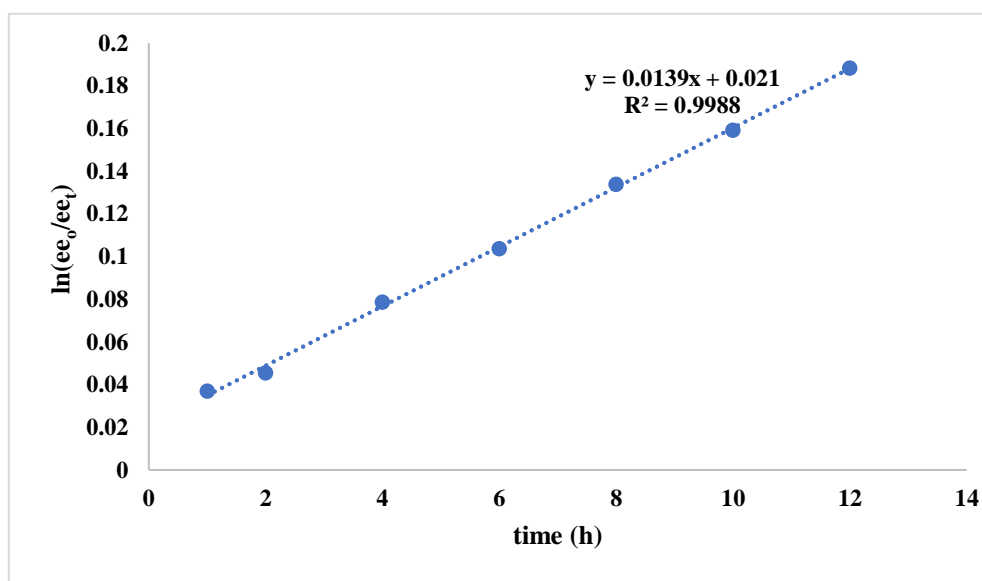

**Figure S8.** The plot of  $\ln(ee_0/ee_t)$  vs time of **4ya** at 130 °C

$$k_{\text{racemization}} (130 \text{ } ^\circ\text{C}) = 0.01368 \text{ h}^{-1} = 3.8 \times 10^{-6} \text{ s}^{-1}$$

$$k_{\text{enantiomerization}} (130 \text{ } ^\circ\text{C}) = 1.9 \times 10^{-6} \text{ s}^{-1}$$

$$\Delta G^\ddagger_{\text{enantiomerization}} = 143.86 \text{ kJ/mol} = 34.38 \text{ kcal/mol}$$

$$t_{1/2} (25 \text{ } ^\circ\text{C}) = 2.8 \times 10^4 \text{ years}$$

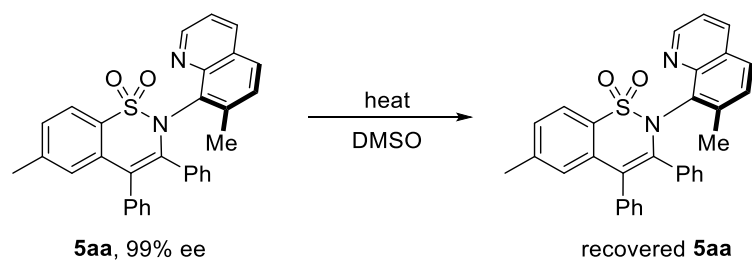

A solution of (*R*)-**5aa** (10.0 mg, 99% ee) in DMSO (1.0 mL) was heated at the specific temperatures (Table ). The ee value was determined by chiral HPLC analysis at different intervals.

**Table S24.** Thermal racemization of product **5aa**

| Temp.(°C) \ Time (h) | Time (h) |        |        |        |        |        |        |
|----------------------|----------|--------|--------|--------|--------|--------|--------|
|                      | 1        | 2      | 4      | 6      | 8      | 10     | 12     |
| 100                  | 98.846   | 98.760 | 98.578 | 98.510 | 98.272 | 98.156 | 97.680 |
| 120                  | 97.990   | 96.932 | 94.406 | 93.222 | 92.274 | 90.694 | 88.504 |
| 130                  | 96.492   | 93.918 | 89.966 | 87.772 | 84.498 | 79.818 | 75.750 |

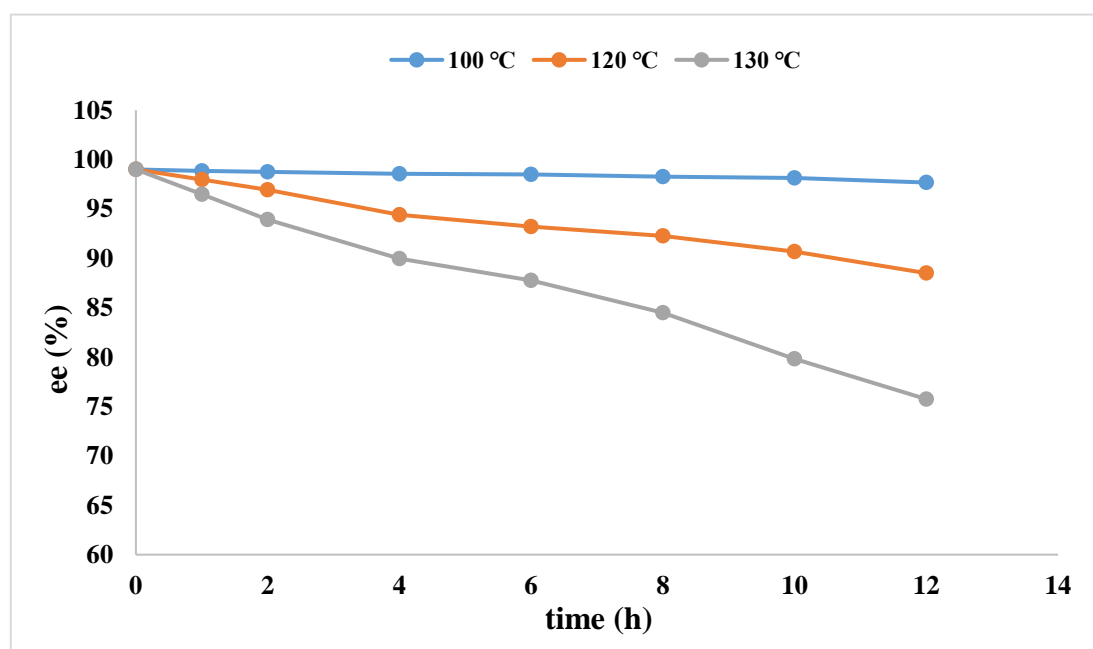

**Figure S9.** The ee value of **5aa** vs time at different temperature in DMSO



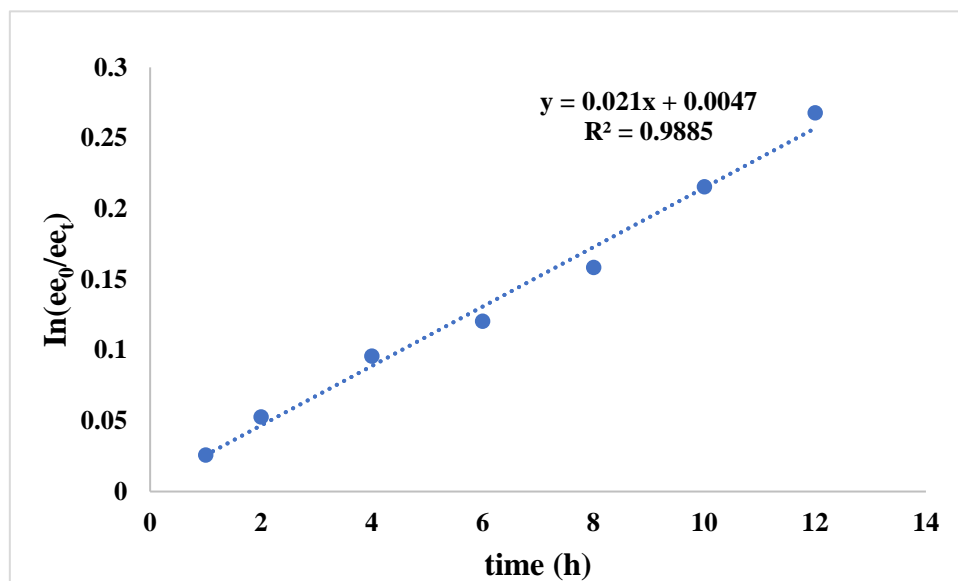

**Figure S10.** The plot of  $\ln(ee_0/ee_t)$  vs time of **5aa** at 130 °C

$$k_{\text{racemization}} (130 \text{ } ^\circ\text{C}) = 5.8 \times 10^{-6} \text{ s}^{-1}$$

$$k_{\text{enantiomerization}} (130 \text{ } ^\circ\text{C}) = 2.9 \times 10^{-6} \text{ s}^{-1}$$

$$\Delta G^\ddagger_{\text{enantiomerization}} = 142.49 \text{ kJ/mol} = 34.06 \text{ kcal/mol}$$

$$t_{1/2} (25 \text{ } ^\circ\text{C}) = 1.6 \times 10^4 \text{ years}$$

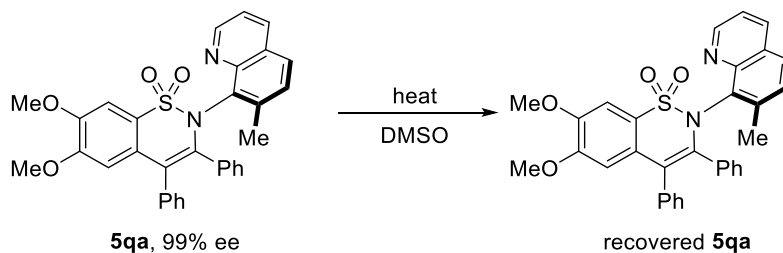

A solution of (*R*)-**5qa** (10.0 mg, 99% ee) in DMSO (1.0 mL) was heated at 130 °C (Table). The ee value was determined by chiral HPLC analysis at different intervals.

**Table S25.** Thermal racemization of product **5qa**.

| Temp.(°C) | Time (h) |        |        |        |        |        |        |
|-----------|----------|--------|--------|--------|--------|--------|--------|
|           | 1        | 2      | 4      | 6      | 8      | 10     | 12     |
| 130       | 96.256   | 95.526 | 92.712 | 88.890 | 85.380 | 82.114 | 78.866 |

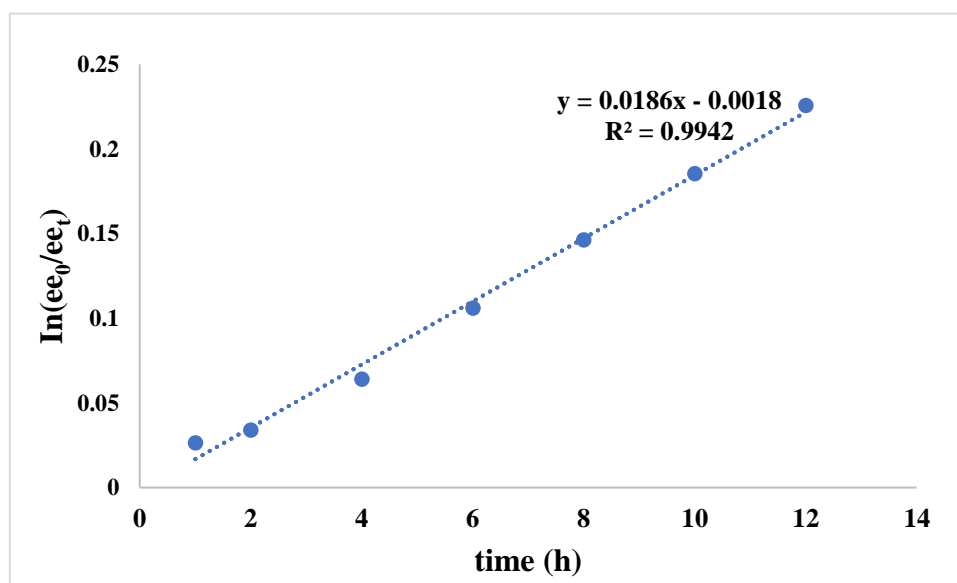

**Figure S11.** The plot of  $\ln(ee_0/ee_t)$  vs time of **5qa** at 130 °C

$$k_{\text{racemization}} (130 \text{ } ^\circ\text{C}) = 5.2 \times 10^{-6} \text{ s}^{-1}$$

$$k_{\text{enantiomerization}} (130 \text{ } ^\circ\text{C}) = 2.6 \times 10^{-6} \text{ s}^{-1}$$

$$\Delta G^\ddagger_{\text{enantiomerization}} = 142.86 \text{ kJ/mol} = 34.14 \text{ kcal/mol}$$

$$t_{1/2} (25 \text{ } ^\circ\text{C}) = 1.9 \times 10^4 \text{ years}$$

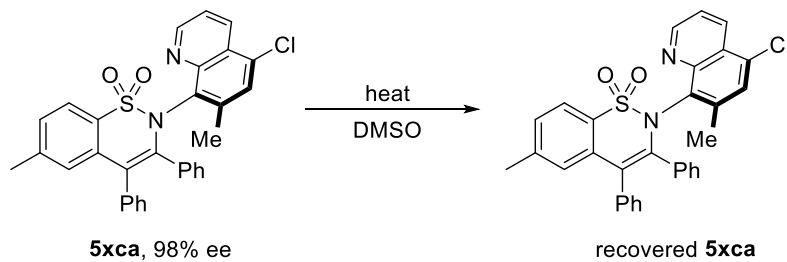

**Table S26.** Thermal racemization of product **5xca**.

| Temp.(°C) | Time (h) |        |        |        |        |        |        |
|-----------|----------|--------|--------|--------|--------|--------|--------|
|           | 1        | 2      | 4      | 6      | 8      | 10     | 12     |
| 130       | 97.048   | 96.114 | 92.166 | 86.860 | 83.880 | 79.564 | 74.638 |

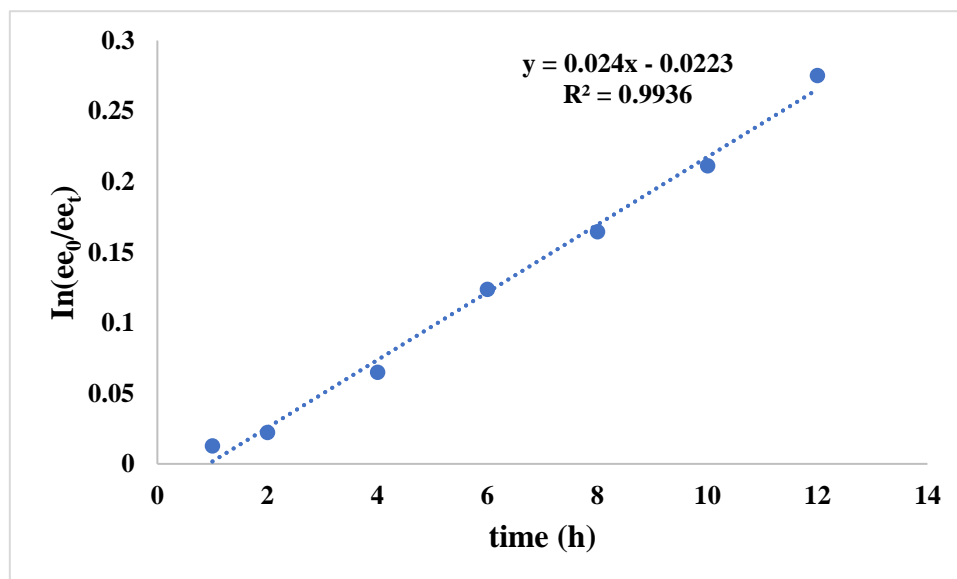

**Figure S12.** The plot of  $\ln(ee_0/ee_t)$  vs time of **5xca** at 130 °C

$$k_{\text{racemization}} (130\text{ }^\circ\text{C}) = 6.6 \times 10^{-6} \text{ s}^{-1}$$

$$k_{\text{enantiomerization}} (130\text{ }^\circ\text{C}) = 3.3 \times 10^{-6} \text{ s}^{-1}$$

$$\Delta G^\ddagger_{\text{enantiomerization}} = 142.06 \text{ kJ/mol} = 33.95 \text{ kcal/mol}$$

$$t_{1/2} (25\text{ }^\circ\text{C}) = 1.4 \times 10^4 \text{ years}$$

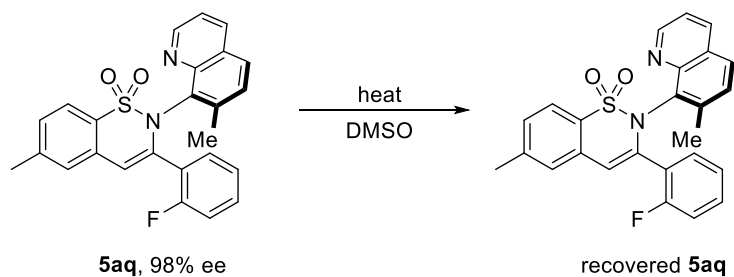

**Table S27.** Thermal racemization of product **5aq**

| Temp.(°C) | Time (h) |        |        |        |        |        |        |
|-----------|----------|--------|--------|--------|--------|--------|--------|
|           | 1        | 2      | 4      | 6      | 8      | 10     | 12     |
| 130       | 89.192   | 72.934 | 66.610 | 56.098 | 61.884 | 52.284 | 42.590 |

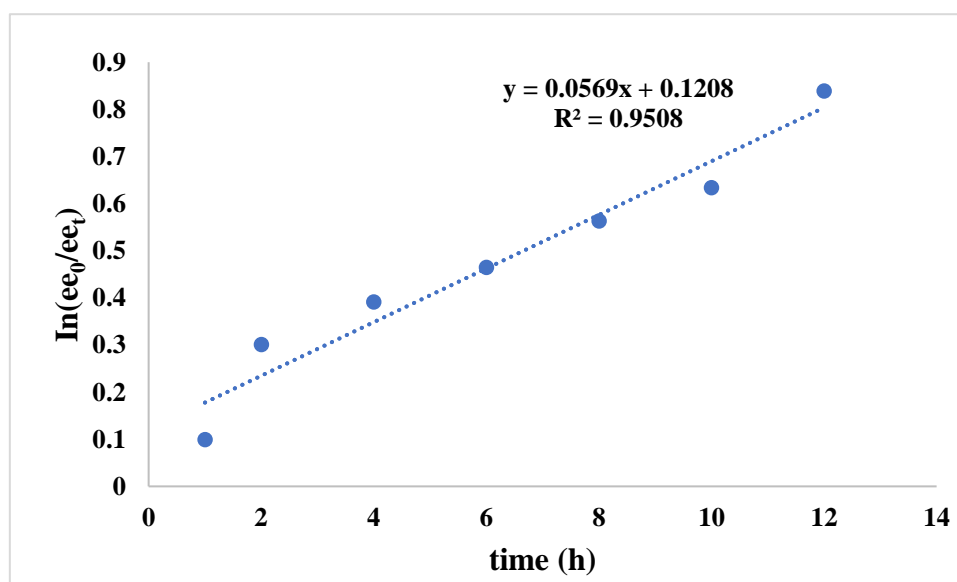

**Figure S13.** The plot of  $\ln(ee_0/ee_t)$  vs time of **5aq** at 130 °C

$$k_{\text{racemization}} (130\text{ }^\circ\text{C}) = 1.58 \times 10^{-5} \text{ s}^{-1}$$

$$k_{\text{enantiomerization}} (130\text{ }^\circ\text{C}) = 7.9 \times 10^{-6} \text{ s}^{-1}$$

$$\Delta G^\ddagger_{\text{enantiomerization}} = 139.14 \text{ kJ/mol} = 33.26 \text{ kcal/mol}$$

$$t_{1/2} (25\text{ }^\circ\text{C}) = 4.2 \times 10^3 \text{ years}$$

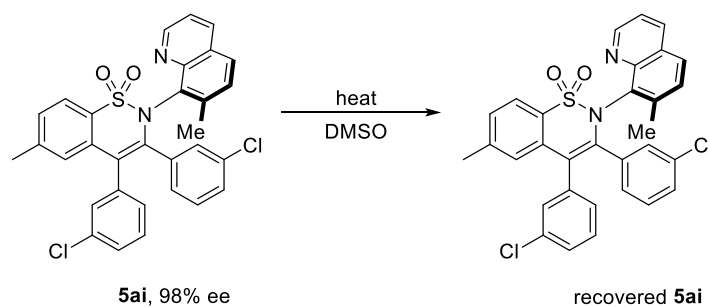

**Table S28. Thermal racemization of product 5ai**

| Temp.(°C) | Time (h) |        |        |        |        |        |        |
|-----------|----------|--------|--------|--------|--------|--------|--------|
|           | 1        | 2      | 4      | 6      | 8      | 10     | 12     |
| 130       | 93.170   | 89.720 | 82.568 | 78.004 | 72.844 | 69.582 | 62.810 |

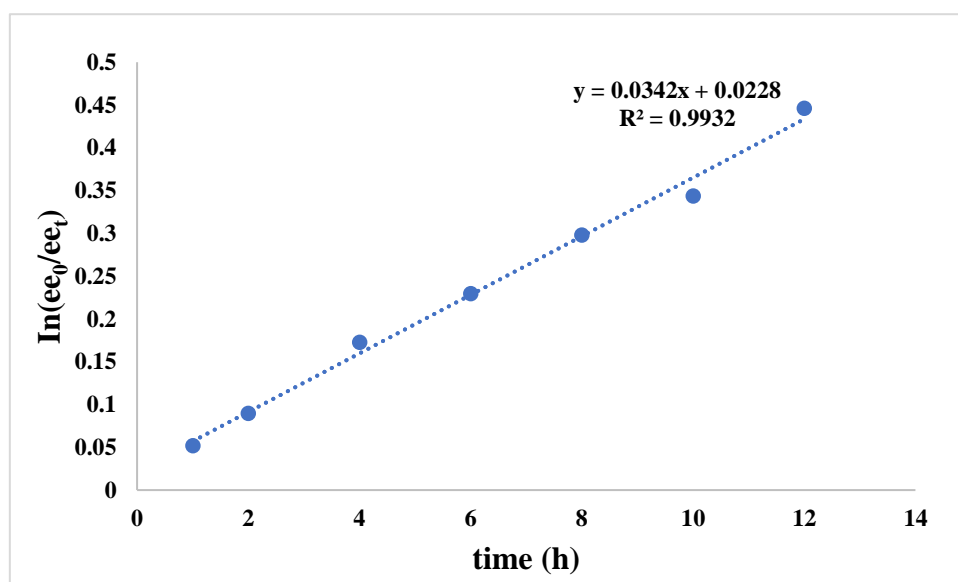

**Figure S14. The plot of  $\ln(ee_0/ee_t)$  vs time of 5ai at 130 °C**

$$k_{\text{racemization}} (130 \text{ } ^\circ\text{C}) = 9.50 \times 10^{-6} \text{ s}^{-1}$$

$$k_{\text{enantiomerization}} (130 \text{ } ^\circ\text{C}) = 4.75 \times 10^{-6} \text{ s}^{-1}$$

$$\Delta G^\ddagger_{\text{enantiomerization}} = 140.85 \text{ kJ/mol} = 33.66 \text{ kcal/mol}$$

$$t_{1/2} (25 \text{ } ^\circ\text{C}) = 8.4 \times 10^3 \text{ years}$$

## 9. X-ray crystal structure of 4aa, 5aa

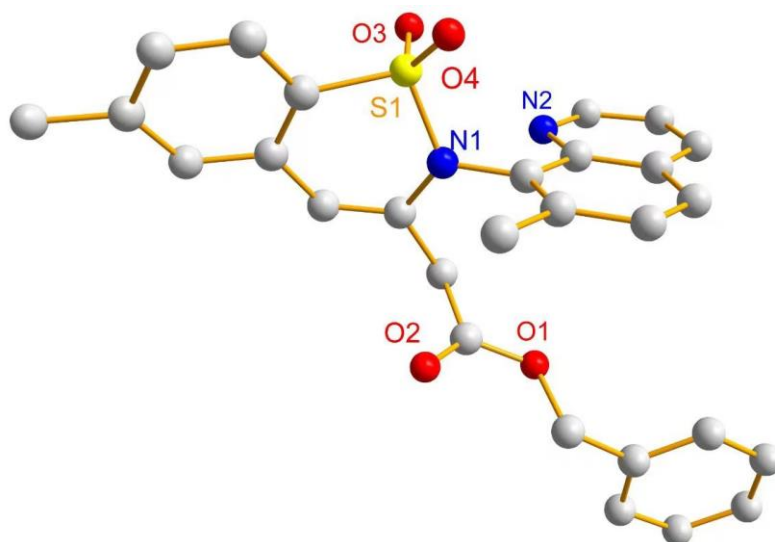

**Figure S15.** X-ray molecular structure of **4aa** (CCDC 2241825).

### Crystal data and structure refinement for **4aa**.

|                                    |                                                                 |
|------------------------------------|-----------------------------------------------------------------|
| Identification code                | <b>4aa</b>                                                      |
| Empirical formula                  | C <sub>28</sub> H <sub>24</sub> N <sub>2</sub> O <sub>4</sub> S |
| Formula weight                     | 484.55                                                          |
| Temperature/K                      | 199.99(10)                                                      |
| Crystal system                     | orthorhombic                                                    |
| Space group                        | P2 <sub>1</sub> 2 <sub>1</sub> 2 <sub>1</sub>                   |
| a/Å                                | 8.7020(3)                                                       |
| b/Å                                | 10.7451(4)                                                      |
| c/Å                                | 25.9020(9)                                                      |
| α/                                 | 90                                                              |
| β/                                 | 90                                                              |
| γ/                                 | 90                                                              |
| Volume/Å <sup>3</sup>              | 2421.94(15)                                                     |
| Z                                  | 4                                                               |
| ρ <sub>calc</sub> /cm <sup>3</sup> | 1.329                                                           |
| μ/mm <sup>-1</sup>                 | 1.497                                                           |
| F(000)                             | 1016.0                                                          |
| Crystal size/mm <sup>3</sup>       | 0.03 × 0.01 × 0.01                                              |
| Radiation                          | CuKα (λ = 1.54184)                                              |
| 2θ range for data collection/      | 6.826 to 129.98                                                 |
| Index ranges                       | -10 ≤ h ≤ 10, -12 ≤ k ≤ 9, -29 ≤ l ≤ 30                         |
| Reflections collected              | 7568                                                            |
| Independent reflections            | 3888 [R <sub>int</sub> = 0.0895, R <sub>sigma</sub> = 0.0984]   |

|                                                |                                  |
|------------------------------------------------|----------------------------------|
| Data/restraints/parameters                     | 3888/0/318                       |
| Goodness-of-fit on $F^2$                       | 1.159                            |
| Final R indexes [ $I \geq 2\sigma(I)$ ]        | $R_1 = 0.0589$ , $wR_2 = 0.1715$ |
| Final R indexes [all data]                     | $R_1 = 0.0840$ , $wR_2 = 0.1748$ |
| Largest diff. peak/hole / $e \text{ \AA}^{-3}$ | 0.37/-0.47                       |
| Flack parameter                                | 0.02(3)                          |

### Method for crystal growth:

The pure compound **4aa** was dissolved in DCM in a little sample bottle. And hexane was added dropwise in the bottle. Then, the bottle is sealed with plastic film, and two holes are made in the plastic film. The bottle was placed in a quiet environment.

### Crystal measurement:

A dichloromethane and hexane mixture of **4aa** were slowly evaporated at ambient temperature over a period of one day, to afford single crystals suitable for an X-ray crystallographic study. Single-crystal X-ray diffraction data were collected on a Rigaku XtaLAB Pro diffractometer with Mo-K $\alpha$  radiation ( $\lambda = 1.54184 \text{ \AA}$ ) for compound **4aa**. The structure was solved by Direct Method of SHELXS-97 and refined by full-matrix least-squares techniques using the SHELXL-97 program. Non-hydrogen atoms were refined with anisotropic temperature parameters, and hydrogen atoms of the ligands were refined as rigid groups.

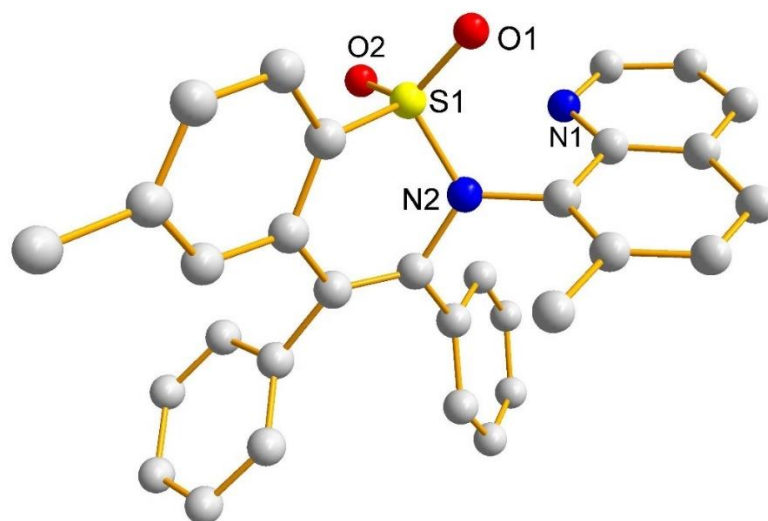

**Figure S16.** X-ray molecular structure of **5aa** (CCDC 2248260).

**Crystal data and structure refinement for 5aa.**

|                                    |                                                                 |
|------------------------------------|-----------------------------------------------------------------|
| Identification code                | <b>5aa</b>                                                      |
| Empirical formula                  | C <sub>31</sub> H <sub>24</sub> N <sub>2</sub> O <sub>2</sub> S |
| Formula weight                     | 488.58                                                          |
| Temperature/K                      | 297.15                                                          |
| Crystal system                     | triclinic                                                       |
| Space group                        | P-1                                                             |
| a/Å                                | 8.3410(15)                                                      |
| b/Å                                | 9.1638(18)                                                      |
| c/Å                                | 16.563(3)                                                       |
| α/                                 | 97.862(7)                                                       |
| β/                                 | 92.549(7)                                                       |
| γ/                                 | 90.235(7)                                                       |
| Volume/Å <sup>3</sup>              | 1252.8(4)                                                       |
| Z                                  | 2                                                               |
| ρ <sub>calc</sub> /cm <sup>3</sup> | 1.295                                                           |
| μ/mm <sup>-1</sup>                 | 0.161                                                           |
| F(000)                             | 512.0                                                           |
| Crystal size/mm <sup>3</sup>       | 0.2 × 0.1 × 0.05                                                |
| Radiation                          | MoKα (λ = 0.71073)                                              |
| 2θ range for data collection/      | 4.488 to 50                                                     |
| Index ranges                       | -9 ≤ h ≤ 9, -10 ≤ k ≤ 10, -19 ≤ l ≤ 19                          |



|                                                |                                                                  |
|------------------------------------------------|------------------------------------------------------------------|
| Reflections collected                          | 46254                                                            |
| Independent reflections                        | 4404 [ $R_{\text{int}} = 0.1560$ , $R_{\text{sigma}} = 0.0803$ ] |
| Data/restraints/parameters                     | 4404/50/373                                                      |
| Goodness-of-fit on $F^2$                       | 1.115                                                            |
| Final R indexes [ $I \geq 2\sigma(I)$ ]        | $R_1 = 0.1551$ , $wR_2 = 0.3901$                                 |
| Final R indexes [all data]                     | $R_1 = 0.1698$ , $wR_2 = 0.3961$                                 |
| Largest diff. peak/hole / $e \text{ \AA}^{-3}$ | 0.60/-0.65                                                       |

### Method for crystal growth:

The pure compound **5aa** was dissolved in DCM and toluene (1:1) in a little sample bottle. And hexane was added dropwise in the bottle. Then, the bottle is sealed with plastic film, and two holes are made in the plastic film. The bottle was placed in a quiet environment.

### Crystal measurement:

A dichloromethane and hexane mixture of **5aa** were slowly evaporated at ambient temperature over a period of one day, to afford single crystals suitable for an X-ray crystallographic study. Single-crystal X-ray diffraction data were collected on a Rigaku XtaLAB Pro diffractometer with Mo-K $\alpha$  radiation ( $\lambda = 1.54184 \text{ \AA}$ ) for compound **5aa**. The structure was solved by Direct Method of SHELXS-97 and refined by full-matrix least-squares techniques using the SHELXL-97 program. Non-hydrogen atoms were refined with anisotropic temperature parameters, and hydrogen atoms of the ligands were refined as rigid groups.

## II. Supplemental references

1. X.-J. Si, D. Yang, M.-C. Sun, D. Wei, M.-P. Song and J.-L. Niu, *Nat. Synth*, 2022, **1**, 709-718.
2. O. Planas, C. J. Whiteoak, A. Company and X. Ribas, *Adv. Synth. Catal.*, 2015, **357**, 4003-4012.
3. a) T. Li, J. Li, Z. Zhu, Y. Chen, X. Li, Q. Yang, J. Xia, W. Zhang, C. Zhang, W. Pan and S. Wu, *Org. Chem. Front.*, 2021, **8**, 928-935. b) S. Haubenreisser, T. H. Wöste, C. Martínez, K. Ishihara and K. Muñiz, *Angew. Chem. Int. Ed.*, 2016, **55**, 1-1.
4. H. Clavier, K. L. Jeune, I. D. Riggi, A. Tenaglia and G. Buono, *Org. Lett.*, 2011, **13**, 308-311.
5. C.-H. Yang, H. Fan, H. Li, S. Hou, X. Sun, D. Luo, Y. Zhang, Z. Yang and J. Chang, *Org. Lett.*, 2019, **21**, 9438-9441.
6. V. S. Raut, M. Jean, N. Vanthuyne, C. Roussel, T. Constantieux, C. Bressy, X. Bugaut, D. Bonne and J. Rodriguez, *J. Am. Chem. Soc.*, 2017, **139**, 2140-2143.
7. Z.-S. Liu, Y. Hua, Q. Gao, Y. Ma, H. Tang, Y. Shang, H.-G. Cheng, Q. Zhou, *Nat. Catal.*, 2020, **3**, 727-733.
8. Z.-S. Liu, P.-P. Xie, X. Hong and Q. Zhou, *Chem*, 2021, **7**, 1917-1932.

### III. Characterization (NMR, HRMS, and HPLC) data

#### (*R*)-benzyl 2-(6-methyl-2-(7-methylquinolin-8-yl)-1,1-dioxido-2*H*-benzo[1,2]thiazin-3-yl)acetate (4aa).

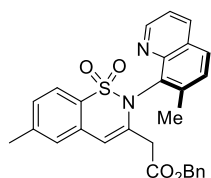

Yield: 87.0 mg (90%). White solid, mp: 169-170 °C.  $^1\text{H NMR}$  (600 MHz,  $\text{CDCl}_3$ )  $\delta$  8.76 (dd,  $J = 4.2, 1.7$  Hz, 1H), 8.04 (dd,  $J = 8.2, 1.8$  Hz, 1H), 7.70 (dd,  $J = 8.2, 2.1$  Hz, 2H), 7.35 (d,  $J = 8.4$  Hz, 1H), 7.31 – 7.23 (m, 6H), 7.15 – 7.06 (m, 2H), 6.53 (s, 1H), 5.46 – 4.27 (m, 2H), 4.10 – 2.90 (m, 2H), 2.46 (s, 3H), 2.27 (s, 3H).  $^{13}\text{C NMR}$  (151 MHz,  $\text{CDCl}_3$ )  $\delta$  168.6, 151.5, 147.0, 142.6, 142.2, 136.7, 135.7, 135.3, 133.1, 131.3, 129.9, 129.4, 129.3, 128.5, 128.4, 128.3, 128.2, 127.4, 127.3, 121.1, 111.8, 66.6, 39.6, 21.7, 18.9. **HRMS** (ESI):  $m/z$   $[\text{M}+\text{H}]^+$  calcd for  $[\text{C}_{28}\text{H}_{25}\text{N}_2\text{O}_4\text{S}]^+$  requires 485.1530, found 485.1516.  $[\alpha]_D^{25} = -116$  ( $c = 0.1, \text{CH}_2\text{Cl}_2$ ). The product was analyzed by HPLC to determine the enantiomeric excess: 94% ee (CHIRALPAK AD-H, hexane/*i*-PrOH = 60/40, detector: 254 nm,  $T = 25$  °C, flow rate: 1 mL/min),  $t_1$  (minor) = 26.5 min,  $t_2$  (major) = 37.4 min.

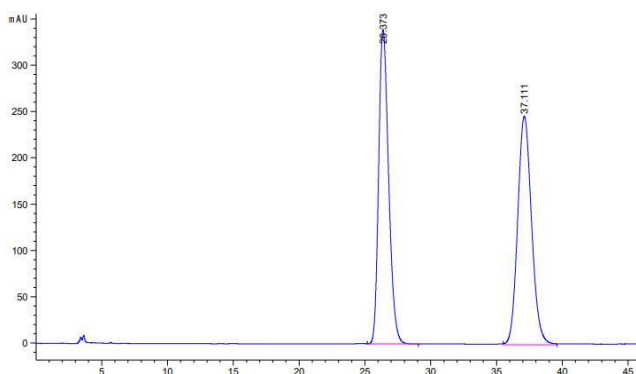

| Peak | RetTime | Area       | Height    | Area    |
|------|---------|------------|-----------|---------|
| 1    | 26.373  | 1.77983e4  | 339.47275 | 49.5361 |
| 2    | 37.111  | 1.813164e4 | 246.91083 | 50.4639 |

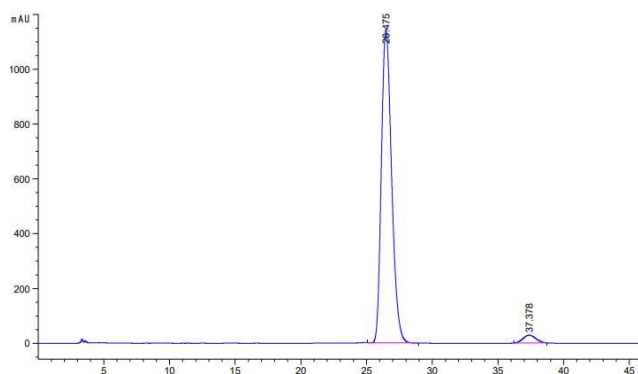

| Peak | RetTime | Area       | Height     | Area    |
|------|---------|------------|------------|---------|
| 1    | 26.475  | 6.20321e4  | 1143.70483 | 96.9503 |
| 2    | 37.378  | 1951.27124 | 28.73534   | 3.0497  |

#### (*R*)-benzyl 2-(6-fluoro-2-(7-methylquinolin-8-yl)-1,1-dioxido-2*H*-benzo[1,2]thiazin-3-yl)acetate (4ba).

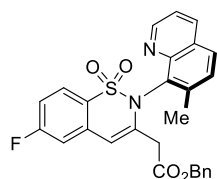

Yield: 92.7 mg (95%). White solid, mp: 172-173 °C.  $^1\text{H NMR}$  (600 MHz,  $\text{CDCl}_3$ )  $\delta$  8.70 (dd,  $J = 4.2, 1.7$  Hz, 1H), 8.07 (dd,  $J = 8.2, 1.7$  Hz, 1H), 7.84 – 7.77 (m, 1H), 7.74 (d,  $J = 8.4$  Hz, 1H), 7.39 (d,  $J = 8.4$  Hz, 1H), 7.36 – 7.22 (m, 4H), 7.23 – 6.97

(m, 4H), 6.56 (s, 1H), 5.14 – 4.52 (m, 2H), 3.67 – 2.97 (m, 2H), 2.36 (s, 3H).  $^{13}\text{C}$  NMR (151 MHz,  $\text{CDCl}_3$ )  $\delta$  168.3, 164.4 (d,  $^1J_{\text{C-F}} = 253.6$  Hz), 151.4, 146.7, 142.6, 138.4, 135.9 (d,  $^3J_{\text{C-F}} = 10.0$  Hz), 135.7, 135.2, 131.1, 129.5, 129.4, 128.5, 128.4, 128.3, 127.4, 124.1 (d,  $^3J_{\text{C-F}} = 9.9$  Hz), 121.2, 115.2 (d,  $^2J_{\text{C-F}} = 24.2$  Hz), 113.1 (d,  $^2J_{\text{C-F}} = 23.2$  Hz), 111.2, 111.1, 66.8, 39.6, 19.0.  $^{19}\text{F}$  NMR (565 MHz,  $\text{CDCl}_3$ )  $\delta$  -106.9. HRMS (ESI):  $m/z$   $[\text{M}+\text{H}]^+$  calcd for  $[\text{C}_{27}\text{H}_{22}\text{FN}_2\text{O}_4\text{S}]^+$  requires 489.1279, found 489.1280.  $[\alpha]_{\text{D}}^{25} = -202$  ( $c = 0.1$ ,  $\text{CH}_2\text{Cl}_2$ ). The product was analyzed by HPLC to determine the enantiomeric excess: 93% ee (CHIRALPAK AD-H, hexane/*i*-PrOH = 65/35, detector: 254 nm, T = 25 °C, flow rate: 1 mL/min),  $t_1$  (minor) = 26.7 min,  $t_2$  (major) = 39.3 min.

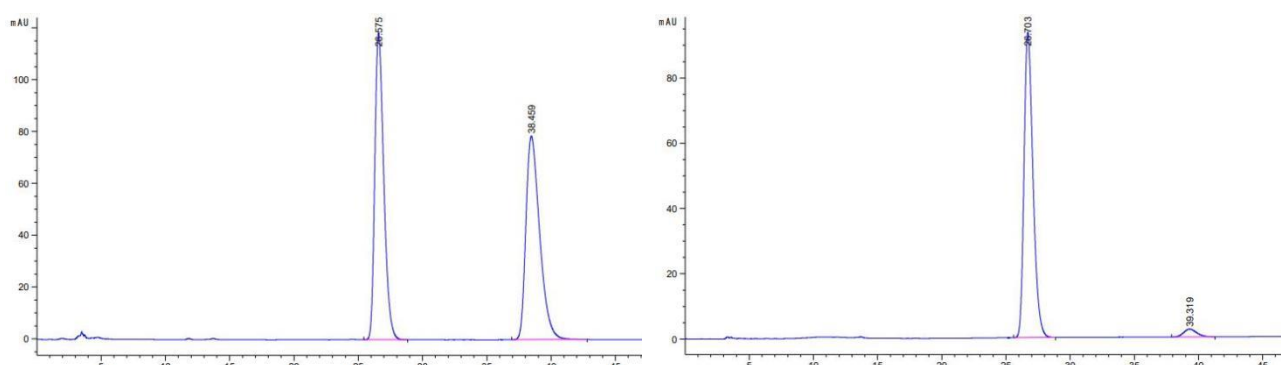

| Peak | RetTime | Area       | Height    | Area    |
|------|---------|------------|-----------|---------|
| 1    | 26.575  | 5751.13232 | 118.44732 | 49.5741 |
| 2    | 38.459  | 5849.94775 | 78.52453  | 50.4259 |

| Peak | RetTime | Area       | Height   | Area    |
|------|---------|------------|----------|---------|
| 1    | 26.703  | 4542.29541 | 93.58768 | 96.3783 |
| 2    | 39.319  | 170.69214  | 2.41446  | 3.6217  |

**(R)-benzyl 2-(6-chloro-2-(7-methylquinolin-8-yl)-1,1-dioxido-2H-benzo[1,2]thiazin-3-yl)acetate**

**(4ca).**

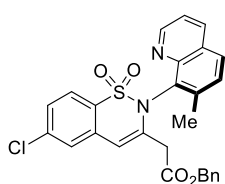

Yield: 92.7 mg (92%). White solid, mp: 162-163 °C.  $^1\text{H}$  NMR (600 MHz,  $\text{CDCl}_3$ )  $\delta$  8.69 (dd,  $J = 4.2, 1.7$  Hz, 1H), 8.06 (dd,  $J = 8.2, 1.7$  Hz, 1H), 7.74 (dd,  $J = 8.4, 2.6$  Hz, 2H), 7.46 (d,  $J = 2.0$  Hz, 1H), 7.43 (dd,  $J = 8.3, 2.0$  Hz, 1H), 7.39 (d,  $J = 8.4$  Hz, 1H), 7.33 – 7.24 (m, 4H), 7.17 – 7.11 (m, 2H), 6.54 (s, 1H), 4.82 – 4.74 (m, 2H), 3.28 – 3.16 (m, 2H), 2.37 (s, 3H).  $^{13}\text{C}$  NMR (151 MHz,  $\text{CDCl}_3$ )  $\delta$  168.2, 151.4, 146.7, 142.5, 138.5, 137.8, 135.8, 135.2, 134.8, 131.0, 130.3, 129.5, 129.4, 128.5, 128.4, 128.3, 127.7, 127.4, 126.6, 122.9, 121.3, 111.0, 66.8, 39.6, 19.0. HRMS (ESI):  $m/z$   $[\text{M}+\text{H}]^+$  calcd for  $[\text{C}_{27}\text{H}_{22}\text{ClN}_2\text{O}_4\text{S}]^+$  requires 505.0983, found 505.0986.  $[\alpha]_{\text{D}}^{25} = -201$  ( $c = 0.1$ ,  $\text{CH}_2\text{Cl}_2$ ). The product was analyzed by HPLC to determine the enantiomeric excess: 89% ee (CHIRALPAK AD-H, hexane/*i*-PrOH = 65/35, detector: 254 nm, T = 25 °C, flow rate: 1 mL/min),  $t_1$  (minor) = 32.0 min,  $t_2$  (major) = 48.4 min.

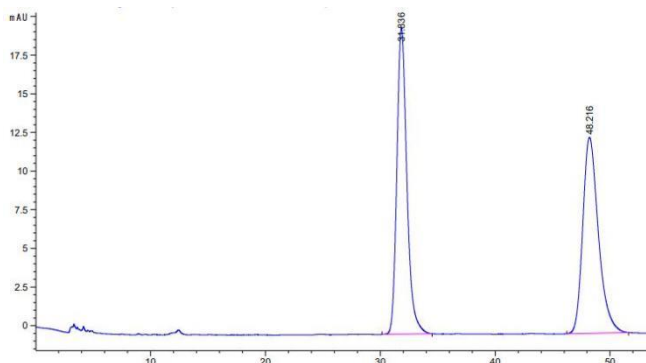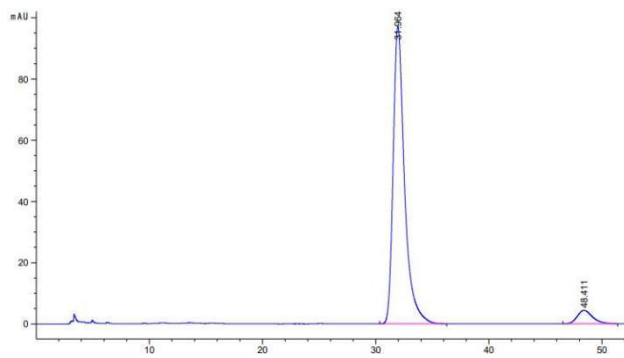

| Peak | RetTime | Area       | Height   | Area    |
|------|---------|------------|----------|---------|
| 1    | 31.836  | 1200.64758 | 19.81678 | 50.0993 |
| 2    | 48.216  | 1195.88940 | 12.67706 | 49.9007 |

| Peak | RetTime | Area       | Height   | Area    |
|------|---------|------------|----------|---------|
| 1    | 31.964  | 6766.04102 | 97.16827 | 94.2645 |
| 2    | 48.411  | 411.67804  | 4.38783  | 5.7355  |

**(R)-benzyl 2-(6-bromo-2-(7-methylquinolin-8-yl)-1,1-dioxido-2H-benzo[1,2]thiazin-3-yl)acetate (4da).**

Yield: 101.0 mg (92%). White solid, mp: 162-163 °C. <sup>1</sup>H NMR (600 MHz, CDCl<sub>3</sub>) δ 8.67 (dd, *J* = 4.2, 1.7 Hz, 1H), 8.03 (dd, *J* = 8.2, 1.7 Hz, 1H), 7.71 (d, *J* = 8.4 Hz, 1H), 7.65 (d, *J* = 8.3 Hz, 1H), 7.60 (d, *J* = 1.9 Hz, 1H), 7.56 (dd, *J* = 8.3, 1.8 Hz, 1H), 7.37 (d, *J* = 8.4 Hz, 1H), 7.31 – 7.24 (m, 4H), 7.14 – 7.09 (m, 2H), 6.51 (s, 1H), 4.80 – 4.72 (m, 2H), 3.90 – 2.72 (m, 2H), 2.34 (s, 3H). <sup>13</sup>C NMR (151 MHz, CDCl<sub>3</sub>) δ 168.2, 151.4, 146.6, 142.5, 138.5, 135.8, 135.2, 135.0, 131.1, 131.0, 130.5, 129.6, 129.5, 129.4, 128.5, 128.4, 128.3, 127.4, 126.1, 123.0, 121.2, 110.8, 66.8, 39.6, 19.0. HRMS (ESI): *m/z* [M+H]<sup>+</sup> calcd for [C<sub>27</sub>H<sub>22</sub>BrN<sub>2</sub>O<sub>4</sub>S]<sup>+</sup> requires 549.0478, found 549.0477. [α]<sub>D</sub><sup>25</sup> = -143 (c = 0.1, CH<sub>2</sub>Cl<sub>2</sub>). The product was analyzed by HPLC to determine the enantiomeric excess: 92% ee (CHIRALPAK AD-H, hexane/*i*-PrOH = 65/35, detector: 254 nm, T = 25 °C, flow rate: 1 mL/min), *t*<sub>1</sub> (minor) = 35.2 min, *t*<sub>2</sub> (major) = 52.0 min.

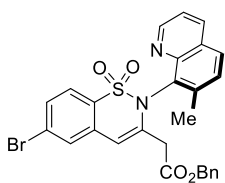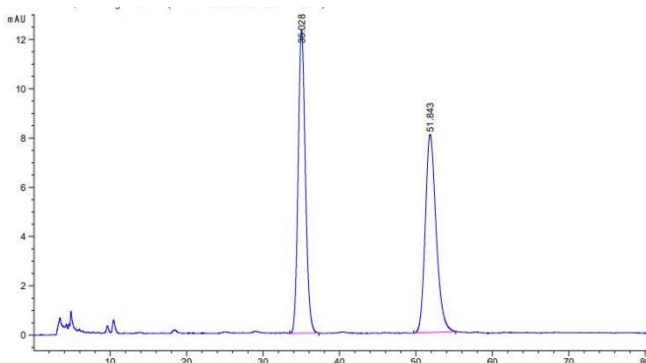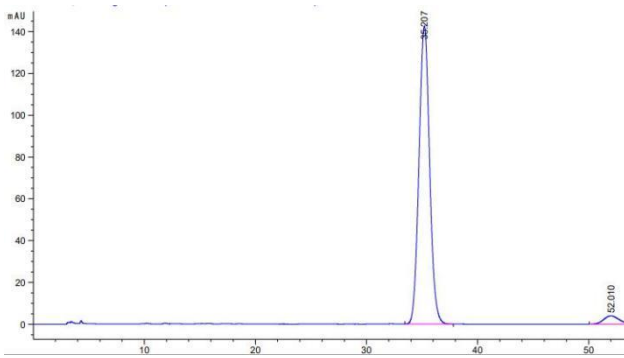

| Peak | RetTime | Area      | Height   | Area    |
|------|---------|-----------|----------|---------|
| 1    | 35.028  | 806.68536 | 12.32828 | 50.4862 |
| 2    | 51.843  | 791.14868 | 8.04253  | 49.5138 |

| Peak | RetTime | Area       | Height    | Area    |
|------|---------|------------|-----------|---------|
| 1    | 35.207  | 9473.80469 | 142.63760 | 96.0426 |
| 2    | 52.010  | 390.36368  | 3.97142   | 3.9574  |

**(R)-benzyl 2-(2-(7-methylquinolin-8-yl)-1,1-dioxido-2H-benzo[1,2]thiazin-3-yl)acetate (4ea).**

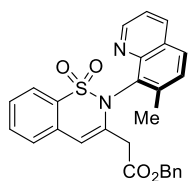

Yield: 78.9 mg (84%). White solid, mp: 151-152 °C.  $^1\text{H NMR}$  (600 MHz,  $\text{CDCl}_3$ )  $\delta$  8.73 (dd,  $J = 4.2, 1.7$  Hz, 1H), 8.06 (dd,  $J = 8.2, 1.7$  Hz, 1H), 7.91 – 7.77 (d,  $J = 8.4$  Hz, 1H), 7.73 (d,  $J = 8.4$  Hz, 1H), 7.64 – 7.59 (m, 1H), 7.48 (t,  $J = 7.2$  Hz, 2H), 7.37 (d,  $J = 8.4$  Hz, 1H), 7.32 – 7.26 (m, 4H), 7.15 – 7.09 (m, 2H), 6.62 (s, 1H), 4.83 – 4.73 (m, 2H), 3.32 – 3.19 (m, 2H), 2.31 (s, 3H).  $^{13}\text{C NMR}$  (151 MHz,  $\text{CDCl}_3$ )  $\delta$  168.6, 151.4, 146.9, 142.5, 136.8, 135.7, 135.2, 133.1, 132.2, 131.7, 131.3, 129.4, 128.5, 128.3, 128.2, 127.6, 127.4, 127.0, 121.2, 121.1, 112.0, 66.7, 39.6, 18.9. **HRMS** (ESI):  $m/z$   $[\text{M}+\text{H}]^+$  calcd for  $[\text{C}_{27}\text{H}_{23}\text{N}_2\text{O}_4\text{S}]^+$  requires 471.1373, found 471.1366.  $[\alpha]_{\text{D}}^{25} = -164$  ( $c = 0.1$ ,  $\text{CH}_2\text{Cl}_2$ ). The product was analyzed by HPLC to determine the enantiomeric excess: 94% ee (CHIRALPAK AD-H, hexane/*i*-PrOH = 65/35, detector: 254 nm,  $T = 25$  °C, flow rate: 1 mL/min),  $t_1$  (minor) = 24.8 min,  $t_2$  (major) = 30.3 min.

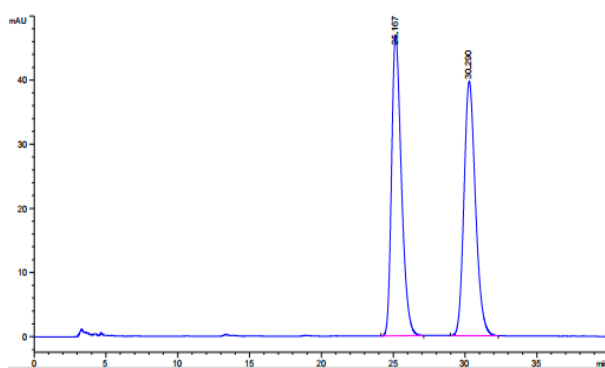

| Peak | RetTime | Area       | Height   | Area    |
|------|---------|------------|----------|---------|
| 1    | 25.167  | 2220.31592 | 46.84093 | 50.2075 |
| 2    | 30.290  | 2201.96729 | 39.67232 | 49.7925 |

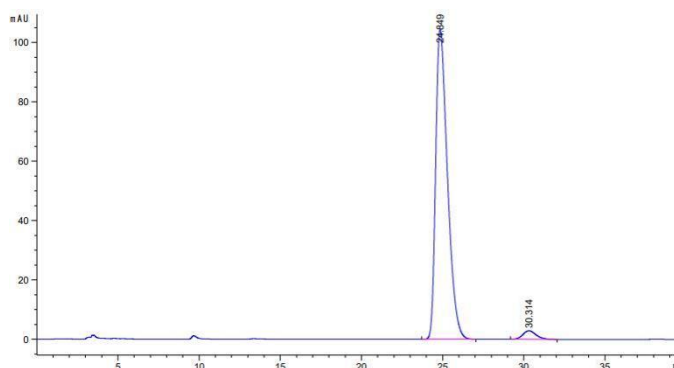

| Peak | RetTime | Area       | Height    | Area    |
|------|---------|------------|-----------|---------|
| 1    | 24.849  | 5264.17285 | 104.34878 | 97.0011 |
| 2    | 30.314  | 162.74728  | 2.89316   | 2.9989  |

**(R)-benzyl 2-(6-(tert-butyl)-2-(7-methylquinolin-8-yl)-1,1-dioxido-2H-benzo[1,2]thiazin-3-yl)acetate (4fa).**

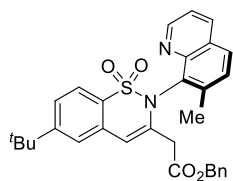

Yield: 97.7 mg (93%). White solid, mp: 170-171 °C.  $^1\text{H NMR}$  (600 MHz,  $\text{CDCl}_3$ )  $\delta$  8.78 (dd,  $J = 4.2, 1.7$  Hz, 1H), 8.06 (dd,  $J = 8.3, 1.7$  Hz, 1H), 7.76 (d,  $J = 8.3$  Hz, 1H), 7.72 (d,  $J = 8.4$  Hz, 1H), 7.52 (dd,  $J = 8.3, 1.9$  Hz, 1H), 7.46 (d,  $J = 1.9$  Hz, 1H), 7.37 (d,  $J = 8.4$  Hz, 1H), 7.32 – 7.26 (m, 4H), 7.15 – 7.09 (m, 2H), 6.60 (s, 1H), 4.81 – 4.73 (m, 2H), 3.32 – 3.22 (m, 2H), 2.30 (s, 3H), 1.41 (s, 9H).  $^{13}\text{C NMR}$  (151 MHz,  $\text{CDCl}_3$ )  $\delta$  168.7, 155.2, 151.5, 147.0, 142.6, 136.5, 135.8, 135.3, 132.8, 131.3, 129.8, 129.4, 129.3, 128.5, 128.3, 128.2, 127.4, 125.2, 123.8, 121.1, 121.0, 112.2, 66.7, 39.6, 35.2, 31.2, 19.0. **HRMS** (ESI):  $m/z$   $[\text{M}+\text{H}]^+$  calcd for

$[C_{31}H_{31}N_2O_4S]^+$  requires 527.1999, found 527.1992.  $[\alpha]_D^{25} = -123$  ( $c = 0.1$ ,  $CH_2Cl_2$ ). The product was analyzed by HPLC to determine the enantiomeric excess: 94% ee (CHIRALPAK AD-H, hexane/*i*-PrOH = 65/35, detector: 254 nm,  $T = 25$  °C, flow rate: 1 mL/min),  $t_1$  (minor) = 18.6 min,  $t_2$  (major) = 32.5 min.

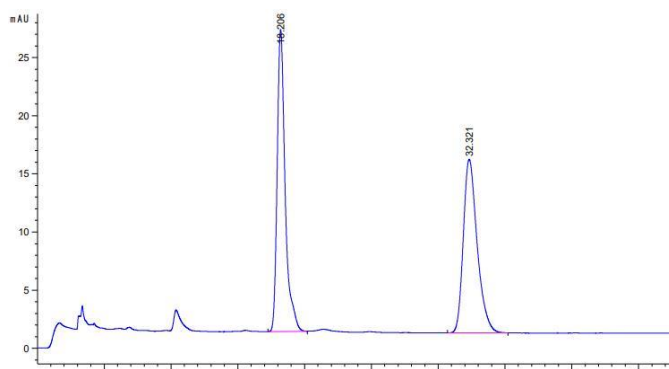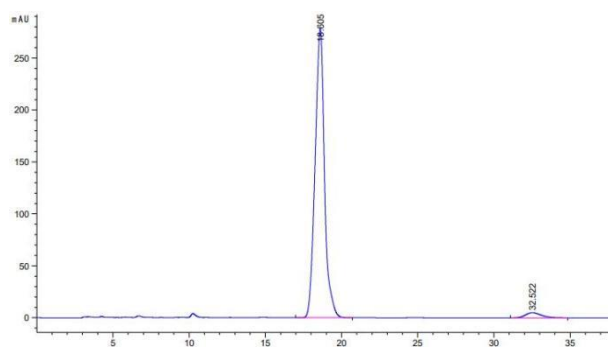

| Peak | RetTime | Area       | Height   | Area    |
|------|---------|------------|----------|---------|
| 1    | 18.206  | 1072.83020 | 25.95861 | 49.9110 |
| 2    | 32.321  | 1076.65454 | 14.93683 | 50.0890 |

| Peak | RetTime | Area      | Height    | Area    |
|------|---------|-----------|-----------|---------|
| 1    | 18.605  | 1.19338e4 | 278.09650 | 97.1207 |
| 2    | 32.522  | 353.79953 | 4.97046   | 2.8793  |

**(R)-benzyl 2-(2-(7-methylquinolin-8-yl)-1,1-dioxido-6-phenyl-2H-benzo[1,2]thiazin-3-yl)acetate (4ga).**

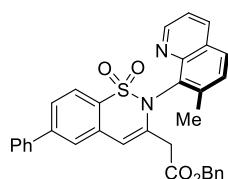

Yield: 97.7 mg (89%). White solid, mp: 210-211 °C.  $^1H$  NMR (600 MHz,  $CDCl_3$ )

$\delta$  8.77 (dd,  $J = 4.2, 1.7$  Hz, 1H), 8.07 (dd,  $J = 8.2, 1.7$  Hz, 1H), 7.90 (d,  $J = 8.1$  Hz, 1H), 7.74 (d,  $J = 8.4$  Hz, 1H), 7.71 – 7.65 (m, 4H), 7.54 – 7.49 (t,  $J = 8.4$  Hz, 2H),

7.47 – 7.42 (t,  $J = 8.4$  Hz, 1H), 7.39 (d,  $J = 8.4$  Hz, 1H), 7.34 – 7.27 (m, 4H), 7.17 – 7.11 (m, 2H), 6.68

(s, 1H), 4.83 – 4.75 (m, 2H), 3.35 – 3.24 (m, 2H), 2.36 (s, 3H).  $^{13}C$  NMR (151 MHz,  $CDCl_3$ )  $\delta$  168.6,

151.5, 150.0, 144.7, 142.6, 139.8, 137.2, 135.8, 135.3, 133.5, 131.3, 131.0, 129.4, 129.3, 129.1, 128.5,

128.3, 128.2, 128.1, 127.4, 126.4, 125.6, 121.8, 121.2, 112.0, 66.7, 39.7, 19.0. HRMS (ESI):  $m/z$

$[M+H]^+$  calcd for  $[C_{33}H_{27}N_2O_4S]^+$  requires 547.1686, found 547.1683.  $[\alpha]_D^{25} = -136$  ( $c = 0.1$ ,  $CH_2Cl_2$ ).

The product was analyzed by HPLC to determine the enantiomeric excess: 95% ee (CHIRALPAK AD-H, hexane/*i*-PrOH = 65/35, detector: 254 nm,  $T = 25$  °C, flow rate: 1 mL/min),  $t_1$  (minor) = 42.6 min,  $t_2$  (major) = 59.4 min.

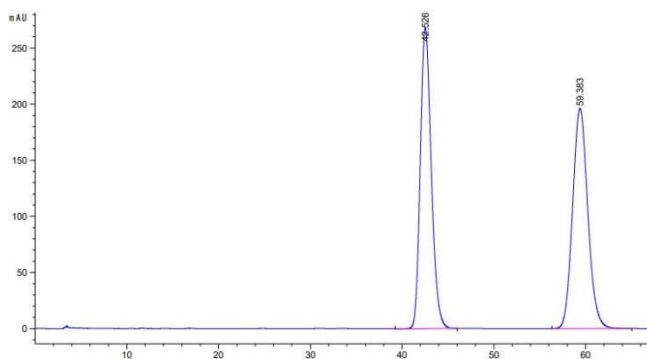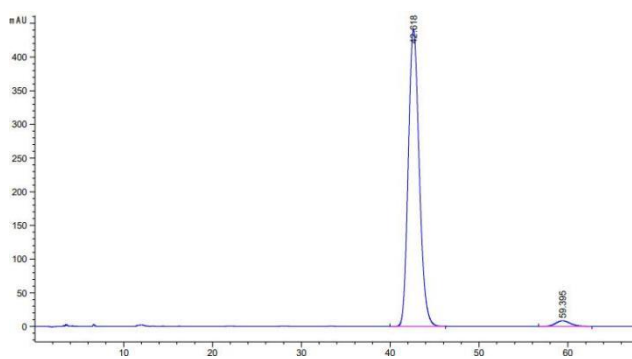

| Peak | RetTime | Area      | Height    | Area    |
|------|---------|-----------|-----------|---------|
| 1    | 42.526  | 2.23288e4 | 268.32419 | 49.6931 |
| 2    | 59.383  | 2.26046e4 | 196.31415 | 50.3069 |

| Peak | RetTime | Area      | Height    | Area    |
|------|---------|-----------|-----------|---------|
| 1    | 42.618  | 3.76942e4 | 439.91489 | 97.4353 |
| 2    | 59.395  | 992.19702 | 8.47763   | 2.5647  |

**(R)-benzyl 2-(6-methoxy-2-(7-methylquinolin-8-yl)-1,1-dioxido-2H-benzo[1,2]thiazin-3-yl)acetate (4ha).**

Yield: 89.9 mg (90%). White solid, mp: 140-141 °C. <sup>1</sup>H NMR (600 MHz, CDCl<sub>3</sub>) δ 8.78 (dd, *J* = 4.2,

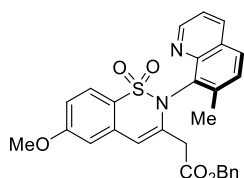

1.7 Hz, 1H), 8.06 (dd, *J* = 8.2, 1.7 Hz, 1H), 7.73 (dd, *J* = 12.6, 8.5 Hz, 2H), 7.37 (d, *J* = 8.4 Hz, 1H), 7.33 – 7.26 (m, 4H), 7.16 – 7.09 (m, 2H), 6.99 (dd, *J* = 8.7, 2.5 Hz, 1H), 6.90 (d, *J* = 2.5 Hz, 1H), 6.53 (s, 1H), 4.81 – 4.73 (m, 2H), 3.89 (s,

3H), 3.52 – 3.07 (m, 2H), 2.31 (s, 3H). <sup>13</sup>C NMR (151 MHz, CDCl<sub>3</sub>) δ 168.6, 162.1, 151.5, 146.9,

142.6, 137.3, 135.8, 135.2, 135.1, 131.2, 129.4, 129.3, 128.5, 128.3, 128.2, 127.4, 125.3, 123.2, 121.1,

114.5, 11.6, 110.4, 66.7, 55.6, 39.6, 18.9. HRMS (ESI): *m/z* [M+H]<sup>+</sup> calcd for [C<sub>28</sub>H<sub>25</sub>N<sub>2</sub>O<sub>5</sub>S]<sup>+</sup> requires

501.1479, found 501.1474. [α]<sub>D</sub><sup>25</sup> = -45 (c = 0.1, CH<sub>2</sub>Cl<sub>2</sub>). The product was analyzed by HPLC to

determine the enantiomeric excess: 95% ee (CHIRALPAK AD-H, hexane/*i*-PrOH = 65/35, detector:

254 nm, T = 25 °C, flow rate: 1 mL/min), *t*<sub>1</sub> (minor) = 37.0 min, *t*<sub>2</sub> (major) = 46.4 min.

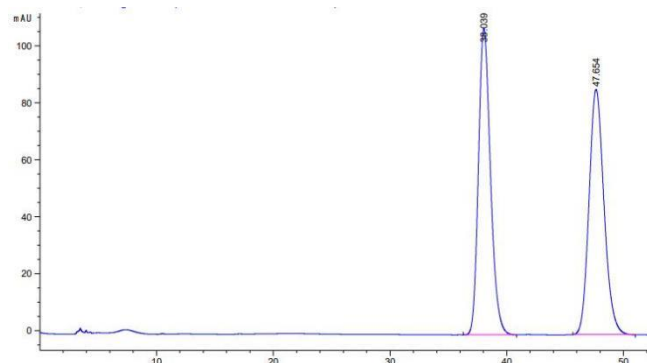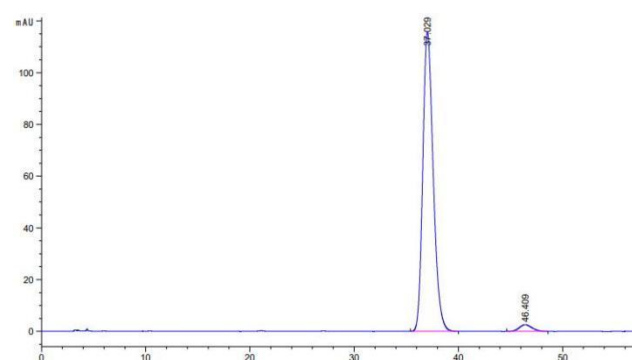

| Peak | RetTime | Area       | Height    | Area    |
|------|---------|------------|-----------|---------|
| 1    | 38.039  | 7701.94287 | 107.62102 | 50.1010 |
| 2    | 47.654  | 7670.90283 | 86.17239  | 49.8990 |

| Peak | RetTime | Area       | Height    | Area    |
|------|---------|------------|-----------|---------|
| 1    | 37.029  | 8044.61572 | 115.58904 | 97.3667 |
| 2    | 46.409  | 217.57132  | 2.59629   | 2.6333  |



**(R)-benzyl 2-(6-acetamido-2-(7-methylquinolin-8-yl)-1,1-dioxido-2H-benzo[1,2]thiazin-3-yl)acetate (4ia).**

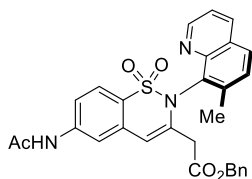

Yield: 56.5 mg (54%). White solid, mp: 148-149 °C.  $^1\text{H NMR}$  (600 MHz,  $\text{CDCl}_3$ )  $\delta$  8.69 (dd,  $J = 4.2, 1.7$  Hz, 1H), 8.27 (s, 1H), 8.01 (dd,  $J = 8.3, 1.8$  Hz, 1H), 7.68 (d,  $J = 8.4$  Hz, 1H), 7.63 – 7.56 (d,  $J = 8.4$  Hz, 2H), 7.43 (dd,  $J = 8.5, 2.0$  Hz, 1H), 7.32 (d,  $J = 8.5$  Hz, 1H), 7.25 – 7.21 (m, 4H), 7.10 – 7.02 (m, 2H), 6.43 (s, 1H), 4.75 – 4.66 (m, 2H), 3.50 – 2.97 (m, 2H), 2.27 (s, 3H), 2.04 (s, 3H).  $^{13}\text{C NMR}$  (151 MHz,  $\text{CDCl}_3$ )  $\delta$  169.3, 168.5, 151.5, 146.7, 142.7, 141.7, 137.0, 136.0, 135.1, 133.9, 130.9, 129.6, 129.4, 128.5, 128.3, 128.2, 127.5, 126.8, 121.9, 121.3, 118.6, 116.8, 111.9, 66.8, 39.6, 24.5, 19.0. **HRMS** (ESI):  $m/z$   $[\text{M}+\text{H}]^+$  calcd for  $[\text{C}_{29}\text{H}_{26}\text{N}_3\text{O}_5\text{S}]^+$  requires 528.1588, found 528.1594.  $[\alpha]_{\text{D}}^{25} = -136$  ( $c = 0.1, \text{CH}_2\text{Cl}_2$ ). The product was analyzed by HPLC to determine the enantiomeric excess: 94% ee (CHIRALPAK AD-H, hexane/*i*-PrOH = 65/35, detector: 254 nm,  $T = 25$  °C, flow rate: 1 mL/min),  $t_1$  (minor) = 11.9 min,  $t_2$  (major) = 19.6 min.

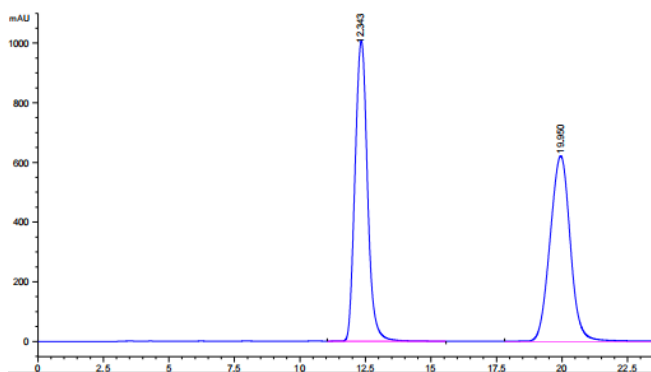

| Peak | RetTime | Area      | Height     | Area    |
|------|---------|-----------|------------|---------|
| 1    | 12.343  | 3.32375e4 | 1007.66034 | 50.0014 |
| 2    | 19.950  | 3.32357e4 | 621.06702  | 49.9986 |

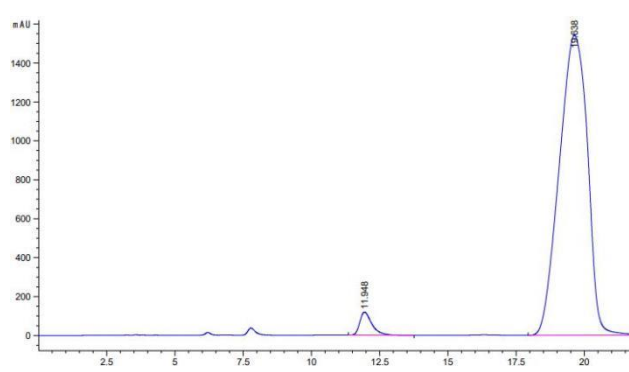

| Peak | RetTime | Area       | Height     | Area    |
|------|---------|------------|------------|---------|
| 1    | 11.948  | 3682.46533 | 118.54623  | 3.2098  |
| 2    | 19.638  | 1.11043e5  | 1541.12708 | 96.7902 |

**(R)-benzyl 2-(2-(7-methylquinolin-8-yl)-1,1-dioxido-6-(trifluoromethyl)-2H-benzo[1,2]thiazin-3-yl)acetate (4ja).**

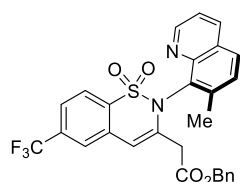

Yield: 77.3 mg (72%). White solid, mp: 174-175 °C.  $^1\text{H NMR}$  (600 MHz,  $\text{CDCl}_3$ )  $\delta$  8.63 (dd,  $J = 4.2, 1.7$  Hz, 1H), 8.07 (dd,  $J = 8.2, 1.8$  Hz, 1H), 7.92 (d,  $J = 8.1$  Hz, 1H), 7.78 – 7.74 (m, 2H), 7.72 (d,  $J = 8.2$  Hz, 1H), 7.41 (d,  $J = 8.4$  Hz, 1H), 7.38 – 7.27 (m, 4H), 7.15 (t,  $J = 6.5$  Hz, 2H), 6.66 (s, 1H), 4.83 – 4.75 (m, 2H), 3.50 – 3.09 (m, 2H), 2.39 (s, 3H).  $^{13}\text{C NMR}$  (151 MHz,  $\text{CDCl}_3$ )  $\delta$  168.1, 151.4, 146.5, 142.5, 138.8, 135.8, 135.1, 134.3,

133.8, 133.6 (q,  $^2J_{C-F} = 32.2$  Hz), 131.0, 129.6, 129.3, 128.5, 128.4, 128.3, 127.4, 124.1 (q,  $^3J_{C-F} = 4.4$  Hz), 123.5 (q,  $^1J_{C-F} = 272.9$  Hz) 122.2, 121.3, 111.4, 66.8, 39.6, 19.0.  **$^{19}\text{F}$  NMR** (565 MHz,  $\text{CDCl}_3$ )  $\delta$  -62.8. **HRMS** (ESI):  $m/z$   $[\text{M}+\text{H}]^+$  calcd for  $[\text{C}_{28}\text{H}_{22}\text{F}_3\text{N}_2\text{O}_4\text{S}]^+$  requires 539.1247, found 539.1247.  $[\alpha]_{\text{D}}^{25} = -106$  ( $c = 0.1$ ,  $\text{CH}_2\text{Cl}_2$ ). The product was analyzed by HPLC to determine the enantiomeric excess: 91% ee (CHIRALPAK AD-H, hexane/*i*-PrOH =65/35, detector: 254 nm,  $T = 25$  °C, flow rate: 1 mL/min),  $t_1$  (minor) = 20.6 min,  $t_2$  (major) = 31.6 min.

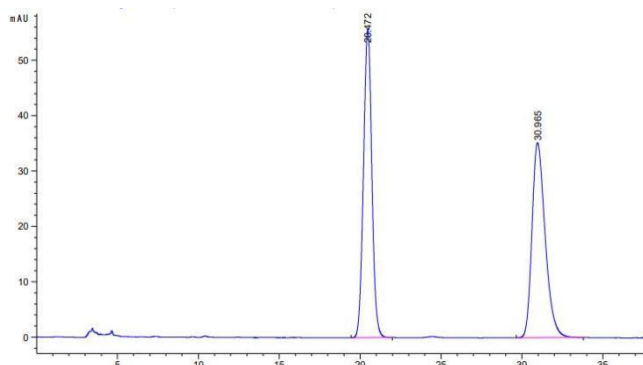

| Peak | RetTime | Area       | Height   | Area    |
|------|---------|------------|----------|---------|
| 1    | 20.472  | 2005.39380 | 55.75622 | 50.1080 |
| 2    | 30.965  | 1996.74768 | 35.21692 | 49.8920 |

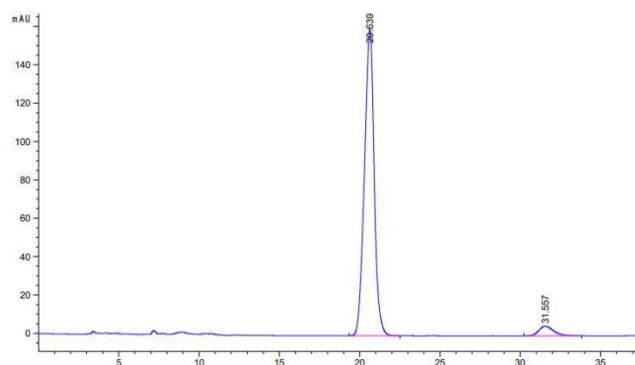

| Peak | RetTime | Area       | Height    | Area    |
|------|---------|------------|-----------|---------|
| 1    | 20.639  | 6730.12842 | 159.91719 | 95.3808 |
| 2    | 31.557  | 325.93695  | 5.08864   | 4.6192  |

**(R)-benzyl 2-(8-fluoro-2-(7-methylquinolin-8-yl)-1,1-dioxido-2H-benzo[1,2]thiazin-3-yl)acetate (4ka).**

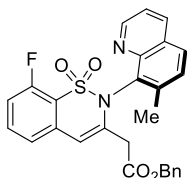

Yield: 89.2 mg (91%). White solid, mp: 155-156 °C.  **$^1\text{H}$  NMR** (600 MHz,  $\text{CDCl}_3$ )  $\delta$  8.64 (dd,  $J = 4.2, 1.7$  Hz, 1H), 8.03 (dd,  $J = 8.2, 1.8$  Hz, 1H), 7.71 (d,  $J = 8.4$  Hz, 1H), 7.54 – 7.48 (m, 1H), 7.37 (d,  $J = 8.4$  Hz, 1H), 7.32 – 7.23 (m, 4H), 7.20 (d,  $J = 7.8$  Hz, 1H), 7.16 – 7.07 (m, 3H), 6.59 (d,  $J = 1.9$  Hz, 1H), 4.81 – 4.73 (m, 2H), 3.24 – 3.12 (m, 2H), 2.39 (s, 3H).  **$^{13}\text{C}$  NMR** (151 MHz,  $\text{CDCl}_3$ )  $\delta$  168.3, 156.6 (d,  $^1J_{C-F} = 256.8$  Hz), 151.3, 146.7, 142.6, 137.6, 136.0, 135.7, 135.2, 132.7 (d,  $^3J_{C-F} = 8.8$  Hz), 131.2, 129.4, 129.3, 128.5, 128.3, 128.2, 127.4, 122.9, 121.1, 121.0 (d,  $^3J_{C-F} = 14.4$  Hz), 114.9 (d,  $^2J_{C-F} = 20.9$  Hz), 112.1, 112.0, 66.8, 39.6, 19.0.  **$^{19}\text{F}$  NMR** (565 MHz,  $\text{CDCl}_3$ )  $\delta$  -113.9. **HRMS** (ESI):  $m/z$   $[\text{M}+\text{H}]^+$  calcd for  $[\text{C}_{27}\text{H}_{22}\text{FN}_2\text{O}_4\text{S}]^+$  requires 489.1279, found 489.1263.  $[\alpha]_{\text{D}}^{25} = -192$  ( $c = 0.1$ ,  $\text{CH}_2\text{Cl}_2$ ). The product was analyzed by HPLC to determine the enantiomeric excess: 97% ee (CHIRALPAK AD-H, hexane/*i*-PrOH =65/35, detector: 254 nm,  $T = 25$  °C, flow rate: 1 mL/min),  $t_1$  (minor) = 20.6 min,  $t_2$  (major) = 26.2 min.

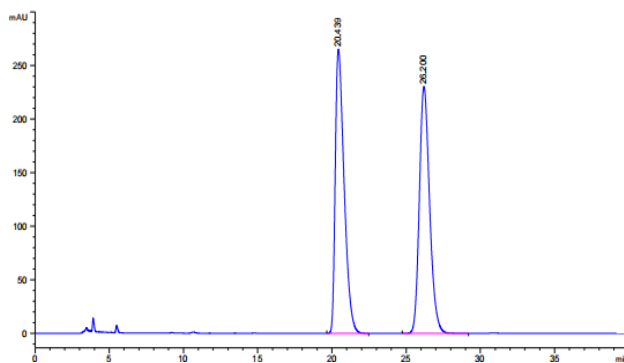

| Peak | RetTime | Area      | Height    | Area    |
|------|---------|-----------|-----------|---------|
| 1    | 20.439  | 1.09782e4 | 265.16409 | 49.8655 |
| 2    | 26.200  | 1.10375e4 | 230.36188 | 50.1345 |

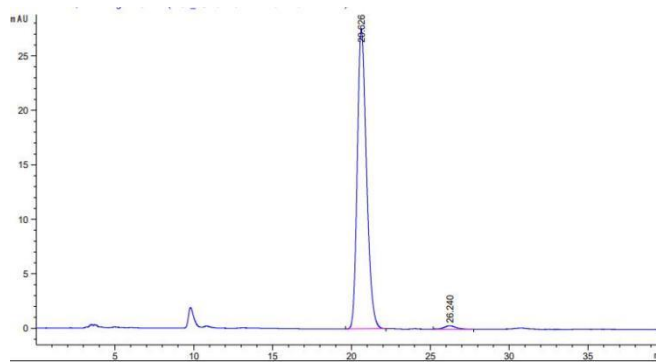

| Peak | RetTime | Area       | Height     | Area    |
|------|---------|------------|------------|---------|
| 1    | 20.626  | 1118.61487 | 27.47996   | 98.5930 |
| 2    | 26.240  | 15.96370   | 3.09292e-1 | 1.4070  |

**(R)-benzyl 2-(8-chloro-2-(7-methylquinolin-8-yl)-1,1-dioxido-2H-benzo[1,2]thiazin-3-yl)acetate (41a).**

Yield: 93.9 mg (93%). White solid, mp: 159-160 °C. <sup>1</sup>H NMR (600 MHz, CDCl<sub>3</sub>) δ 8.66 (dd, *J* = 4.2,

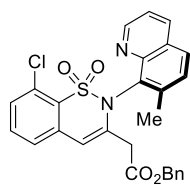

1.7 Hz, 1H), 8.04 (dd, *J* = 8.2, 1.7 Hz, 1H), 7.72 (d, *J* = 8.4 Hz, 1H), 7.46 (t, *J* = 7.9 Hz, 1H), 7.40 (dd, *J* = 8.0, 1.3 Hz, 1H), 7.38 (d, *J* = 8.4 Hz, 1H), 7.35 – 7.28 (m, 4H), 7.31 – 7.24 (m, 1H), 7.18 – 7.11 (m, 2H), 6.57 (s, 1H), 4.83 – 4.75 (m, 2H), 3.26 –

3.14 (m, 2H), 2.40 (s, 3H). <sup>13</sup>C NMR (151 MHz, CDCl<sub>3</sub>) δ 168.3, 151.3, 146.7, 142.5, 137.2, 136.0, 135.8, 135.2, 131.8, 131.4, 130.6, 130.0, 129.5, 129.3, 128.6, 128.5, 128.4, 128.3, 127.4, 126.3, 121.2, 112.4, 66.8, 39.5, 19.0. HRMS (ESI): *m/z* [M+H]<sup>+</sup> calcd for [C<sub>27</sub>H<sub>22</sub>ClN<sub>2</sub>O<sub>4</sub>S]<sup>+</sup> requires 505.0983, found 505.0979. [α]<sub>D</sub><sup>25</sup> = -158 (c = 0.1, CH<sub>2</sub>Cl<sub>2</sub>). The product was analyzed by HPLC to determine the enantiomeric excess: 98% ee (CHIRALPAK AD-H, hexane/*i*-PrOH = 65/35, detector: 254 nm, T = 25 °C, flow rate: 1 mL/min), *t*<sub>1</sub> (minor) = 24.0 min, *t*<sub>2</sub> (major) = 28.4 min.

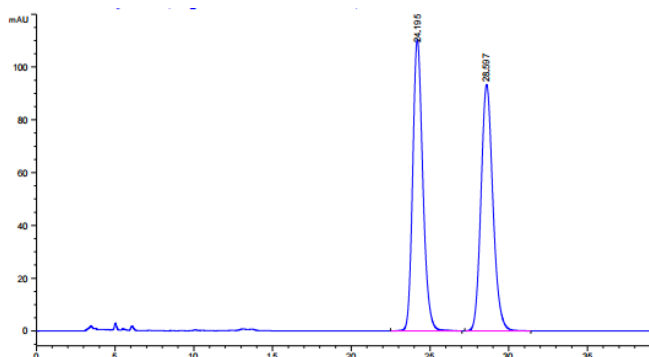

| Peak | RetTime | Area       | Height    | Area    |
|------|---------|------------|-----------|---------|
| 1    | 24.195  | 4913.71631 | 110.40228 | 50.0408 |
| 2    | 28.597  | 4905.71631 | 93.24252  | 49.9592 |

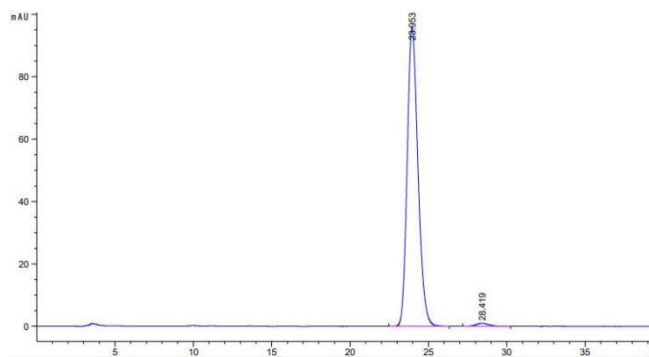

| Peak | RetTime | Area       | Height     | Area    |
|------|---------|------------|------------|---------|
| 1    | 23.953  | 4570.55908 | 95.82829   | 98.8157 |
| 2    | 28.419  | 54.77780   | 9.50165e-1 | 1.1843  |

**(R)-benzyl 2-(8-bromo-2-(7-methylquinolin-8-yl)-1,1-dioxido-2H-benzo[1,2]thiazin-3-yl)acetate (4ma).**

Yield: 75.0 mg (68%). White solid, mp: 145-146 °C. <sup>1</sup>H NMR (600 MHz, CDCl<sub>3</sub>) δ 8.67 – 8.45 (d, *J*

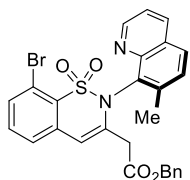

= 4.2 Hz 1H), 7.94 (d, *J* = 8.2 Hz, 1H), 7.62 (d, *J* = 8.4 Hz, 1H), 7.53 (t, *J* = 4.2 Hz, 1H), 7.30 – 7.26 (t, *J* = 4.2 Hz, 3H), 7.22 – 7.15 (m, 4H), 7.04 (s, 2H), 6.47 (s, 1H), 4.73 – 4.63 (m, 2H), 3.16 – 3.05 (m, 2H), 2.29 (s, 3H). <sup>13</sup>C NMR (151 MHz, CDCl<sub>3</sub>)

δ 167.2, 150.3, 145.6, 141.4, 136.0, 135.0, 134.7, 134.1, 132.4, 131.1, 130.8, 130.5, 128.4, 128.3, 127.4, 127.3, 127.2, 126.4, 126.0, 120.1, 114.4, 111.5, 65.7, 38.4, 17.9. HRMS (ESI): *m/z* [M+H]<sup>+</sup>calcd for [C<sub>27</sub>H<sub>22</sub>BrN<sub>2</sub>O<sub>4</sub>S]<sup>+</sup> requires 549.0478, found 549.0482. [α]<sub>D</sub><sup>25</sup> = -214 (c = 0.1, CH<sub>2</sub>Cl<sub>2</sub>). The product was analyzed by HPLC to determine the enantiomeric excess: 96% ee (CHIRALPAK AD-H, hexane/*i*-PrOH =65/35, detector: 254 nm, T = 25 °C, flow rate: 1 mL/min), *t*<sub>1</sub> (minor) = 40.0 min, *t*<sub>2</sub> (major) = 43.7 min.

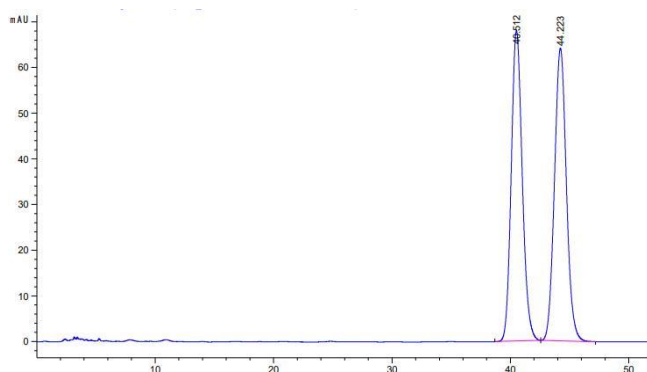

| Peak | RetTime | Area       | Height   | Area    |
|------|---------|------------|----------|---------|
| 1    | 40.512  | 4393.70313 | 67.9409  | 49.5236 |
| 2    | 44.223  | 4478.24023 | 64.06456 | 50.4764 |

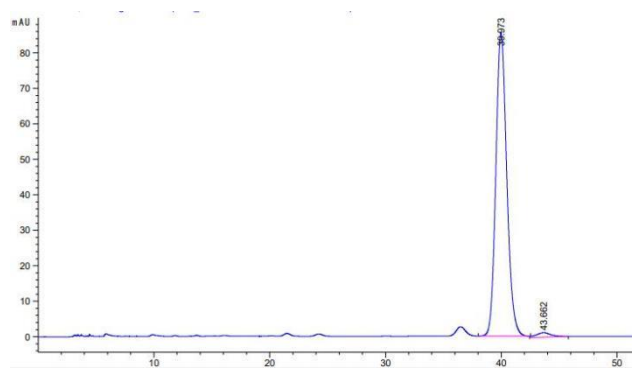

| Peak | RetTime | Area       | Height   | Area    |
|------|---------|------------|----------|---------|
| 1    | 39.973  | 5598.92578 | 85.49664 | 98.0551 |
| 2    | 43.662  | 111.05477  | 1.26821  | 1.9449  |

**(R)-benzyl 2-(7-chloro-2-(7-methylquinolin-8-yl)-1,1-dioxido-2H-benzo[1,2]thiazin-3-yl)acetate (4na).**

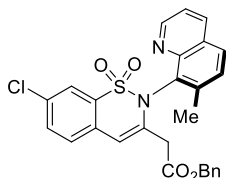

Yield: 71.5 mg (71%). White solid, mp: 133-134 °C. <sup>1</sup>H NMR (600 MHz, CDCl<sub>3</sub>)

δ 8.69 (dd, *J* = 4.2, 1.7 Hz, 1H), 8.07 (dd, *J* = 8.2, 1.7 Hz, 1H), 7.80 (d, *J* = 2.1 Hz, 1H), 7.74 (d, *J* = 8.4 Hz, 1H), 7.57 (dd, *J* = 8.4, 2.1 Hz, 1H), 7.43 – 7.37 (m, 2H),

7.33 – 7.28 (m, 4H), 7.16 – 7.10 (m, 2H), 6.59 (s, 1H), 4.82 – 4.73 (m, 2H), 3.28 – 3.17 (m, 2H), 2.35 (s, 3H). <sup>13</sup>C NMR (151 MHz, CDCl<sub>3</sub>) δ 168.4, 151.4, 146.7, 142.5, 137.2, 135.7, 135.2, 133.1, 133.0, 132.0, 131.6, 131.1, 129.5, 129.3, 128.5, 128.3, 128.2, 127.4, 121.3, 121.2, 111.5, 66.8, 39.6, 19.0.

**HRMS** (ESI):  $m/z$   $[M+H]^+$  calcd for  $[C_{27}H_{22}ClN_2O_4S]^+$  requires 505.0983, found 505.0969.  $[\alpha]_D^{25} = -213$  ( $c = 0.1$ ,  $CH_2Cl_2$ ). The product was analyzed by HPLC to determine the enantiomeric excess: 92% ee (CHIRALPAK AD-H, hexane/*i*-PrOH = 65/35, detector: 254 nm,  $T = 25$  °C, flow rate: 1 mL/min),  $t_1$  (minor) = 24.4 min,  $t_2$  (major) = 30.9 min.

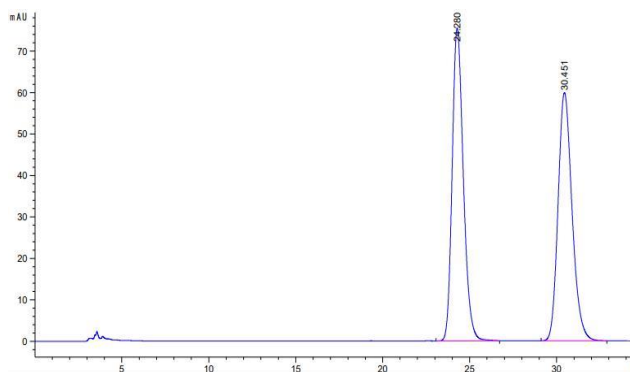

| Peak | RetTime | Area       | Height   | Area    |
|------|---------|------------|----------|---------|
| 1    | 24.280  | 3366.85620 | 75.46064 | 50.1625 |
| 2    | 30.451  | 3345.04150 | 59.87935 | 49.8375 |

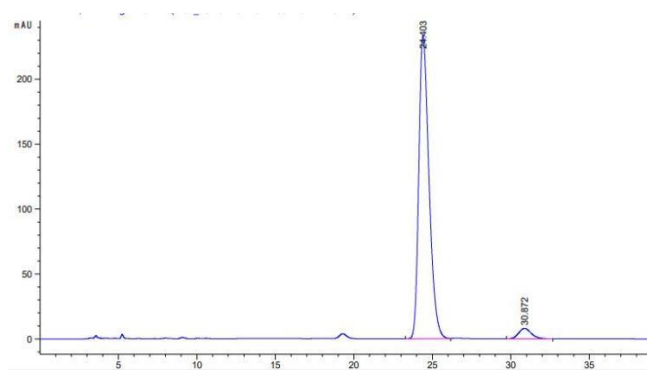

| Peak | RetTime | Area      | Height    | Area    |
|------|---------|-----------|-----------|---------|
| 1    | 24.403  | 1.05257e4 | 233.39333 | 95.9940 |
| 2    | 30.872  | 439.25076 | 7.95748   | 4.0060  |

**(R)-benzyl 2-(7-bromo-2-(7-methylquinolin-8-yl)-1,1-dioxido-2H-benzo[1,2]thiazin-3-yl)acetate (40a).**

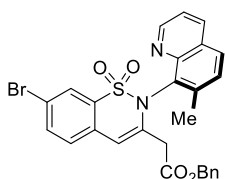

Yield: 77.3 mg (71%). White solid, mp: 126-127 °C.  $^1H$  NMR (600 MHz,  $CDCl_3$ )

$\delta$  8.69 (dd,  $J = 4.2, 1.7$  Hz, 1H), 8.07 (dd,  $J = 8.2, 1.8$  Hz, 1H), 7.94 (d,  $J = 2.0$  Hz, 1H), 7.76 – 7.70 (m, 2H), 7.39 (d,  $J = 8.4$  Hz, 1H), 7.35 (d,  $J = 8.4$  Hz, 1H), 7.33

– 7.28 (m, 4H), 7.18 – 7.10 (m, 2H), 6.58 (s, 1H), 4.82 – 4.73 (m, 2H), 3.27 – 3.16 (m, 2H), 2.35 (s, 3H).

$^{13}C$  NMR (151 MHz,  $CDCl_3$ )  $\delta$  168.3, 151.4, 146.7, 142.5, 137.4, 135.7, 135.2, 134.8, 133.2,

132.0, 131.1, 129.5, 129.3, 128.6, 128.5, 128.3, 128.2, 127.4, 124.1, 121.2, 120.5, 111.6, 66.8, 39.6,

19.0. **HRMS** (ESI):  $m/z$   $[M+H]^+$  calcd for  $[C_{27}H_{22}BrN_2O_4S]^+$  requires 549.0478, found 549.0471.

$[\alpha]_D^{25} = -429$  ( $c = 0.1$ ,  $CH_2Cl_2$ ). The product was analyzed by HPLC to determine the enantiomeric

excess: 92% ee (CHIRALPAK AD-H, hexane/*i*-PrOH = 65/35, detector: 254 nm,  $T = 25$  °C, flow rate:

1 mL/min),  $t_1$  (minor) = 25.6 min,  $t_2$  (major) = 34.2 min.

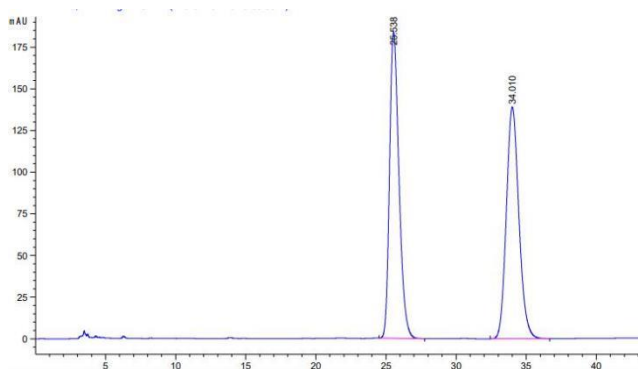

| Peak | RetTime | Area       | Height    | Area    |
|------|---------|------------|-----------|---------|
| 1    | 25.538  | 8581.04688 | 183.76747 | 49.8397 |
| 2    | 34.010  | 8636.23242 | 138.96762 | 50.1603 |

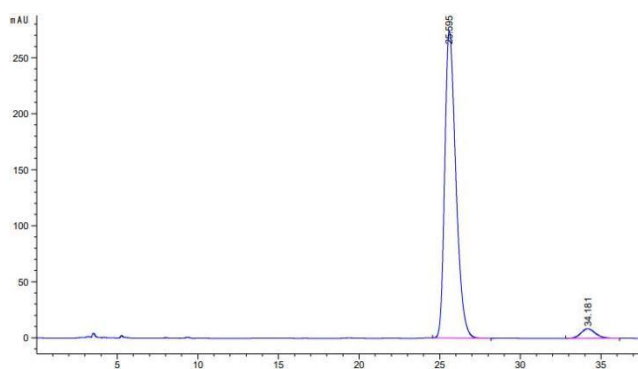

| Peak | RetTime | Area      | Height    | Area    |
|------|---------|-----------|-----------|---------|
| 1    | 25.595  | 1.03588e4 | 274.34100 | 96.1388 |
| 2    | 34.181  | 524.47229 | 8.50869   | 3.8612  |

**(R)-benzyl 2-(6,8-difluoro-2-(7-methylquinolin-8-yl)-1,1-dioxido-2H-benzo[1,2]thiazin-3-yl)acetate (4pa).**

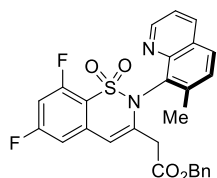

Yield: 41.4 mg (41%). White solid, mp: 153-154 °C. <sup>1</sup>H NMR (600 MHz, CDCl<sub>3</sub>)

δ 8.65 (d, *J* = 4.2 Hz, 1H), 8.07 (d, *J* = 8.2 Hz, 1H), 7.75 (d, *J* = 8.4 Hz, 1H), 7.41

(d, *J* = 8.4 Hz, 1H), 7.33 – 7.29 (m, 4H), 7.15 (dd, *J* = 6.4, 3.0 Hz, 2H), 6.97 – 6.92

(d, 1H), 6.92 – 6.86 (m, 1H), 6.55 (s, 1H), 4.86 – 4.70 (m, 2H), 3.24 – 3.11 (m, 2H), 2.45 (s, 3H). <sup>13</sup>C

NMR (151 MHz, CDCl<sub>3</sub>) δ 168.0, 164.0 (d, <sup>1</sup>*J*<sub>C-F</sub> = 241.4 Hz), 157.6 (d, <sup>1</sup>*J*<sub>C-F</sub> = 241.6 Hz), 151.3,

146.6, 142.7, 139.1, 137.5, 137.4, 135.7, 135.1, 130.9, 129.5, 129.4, 128.5, 128.4, 128.3, 127.4, 121.3,

117.5 (d, <sup>2</sup>*J*<sub>C-F</sub> = 11.1 Hz), 111.4, 109.3 (d, <sup>2</sup>*J*<sub>C-F</sub> = 18.8 Hz), 103.6 (d, <sup>3</sup>*J*<sub>C-F</sub> = 2.3 Hz), 66.9, 39.6, 19.0.

<sup>19</sup>F NMR (565 MHz, CDCl<sub>3</sub>) δ -103.4, -109.0. HRMS (ESI): *m/z* [M+H]<sup>+</sup> calcd for [C<sub>27</sub>H<sub>21</sub>F<sub>2</sub>N<sub>2</sub>O<sub>4</sub>S]<sup>+</sup>

requires 507.1185, found 507.1189. [α]<sub>D</sub><sup>25</sup> = -193 (c = 0.1, CH<sub>2</sub>Cl<sub>2</sub>). The product was analyzed by

HPLC to determine the enantiomeric excess: 96% ee (CHIRALPAK AD-H, hexane/*i*-PrOH = 65/35,

detector: 254 nm, T = 25 °C, flow rate: 1 mL/min), *t*<sub>1</sub> (minor) = 22.0 min, *t*<sub>2</sub> (major) = 39.0 min.

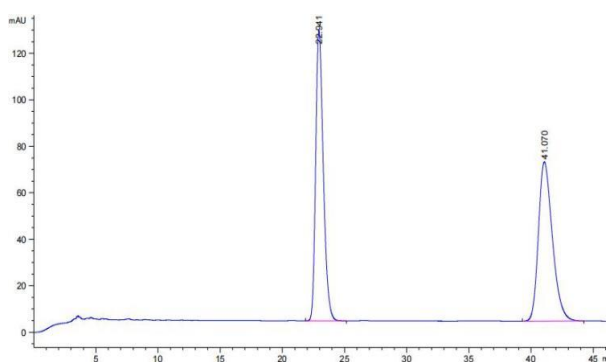

| Peak | RetTime | Area       | Height    | Area    |
|------|---------|------------|-----------|---------|
| 1    | 22.941  | 5330.17334 | 124.94360 | 50.0103 |

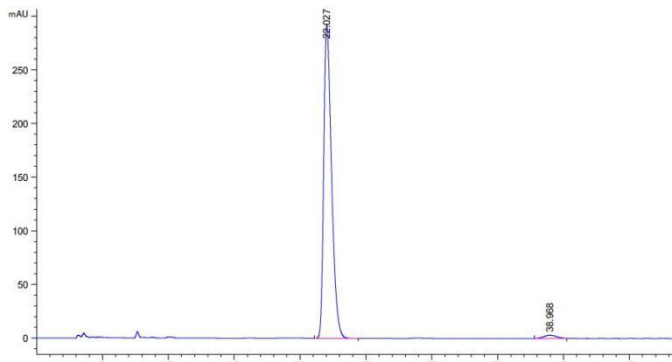

| Peak | RetTime | Area      | Height    | Area    |
|------|---------|-----------|-----------|---------|
| 1    | 22.027  | 1.20335e4 | 292.30167 | 98.3063 |

|   |        |            |          |         |
|---|--------|------------|----------|---------|
| 2 | 41.070 | 5327.98633 | 68.48190 | 49.9897 |
|---|--------|------------|----------|---------|

|   |        |           |         |        |
|---|--------|-----------|---------|--------|
| 2 | 38.968 | 207.31775 | 3.03960 | 1.6937 |
|---|--------|-----------|---------|--------|

**(R)-benzyl 2-(6,7-dimethoxy-2-(7-methylquinolin-8-yl)-1,1-dioxido-2H-benzo[1,2]thiazin-3-yl)acetate (4qa).**

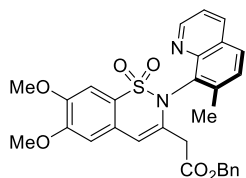

Yield: 46.7 mg (44%). White solid, mp: 168-169 °C. <sup>1</sup>H NMR (600 MHz, CDCl<sub>3</sub>)

δ 8.81 (dd, *J* = 4.2, 1.7 Hz, 1H), 8.07 (dd, *J* = 8.2, 1.7 Hz, 1H), 7.73 (d, *J* = 8.4 Hz, 1H), 7.37 (d, *J* = 8.4 Hz, 1H), 7.35 – 7.32 (m, 1H), 7.31 – 7.24 (m, 4H), 7.13

– 7.07 (m, 2H), 6.90 (s, 1H), 6.50 (s, 1H), 4.80 – 4.70 (m, 2H), 3.99 (s, 3H), 3.92 (s, 3H), 3.28 – 3.19 (m, 2H), 2.29 (s, 3H). <sup>13</sup>C NMR (151 MHz, CDCl<sub>3</sub>) δ 168.8, 151.9, 151.5, 148.9, 147.0, 142.6, 135.7, 135.3, 135.1, 131.3, 129.4, 129.3, 128.4, 128.3, 128.2, 127.4, 127.2, 124.9, 121.1, 111.5, 108.8, 103.3, 66.6, 56.3, 56.2, 39.4, 18.9. HRMS (ESI): *m/z* [M+H]<sup>+</sup> calcd for [C<sub>29</sub>H<sub>27</sub>N<sub>2</sub>O<sub>6</sub>S]<sup>+</sup> requires 531.1584, found 531.1577. [α]<sub>D</sub><sup>25</sup> = -158 (c = 0.1, CH<sub>2</sub>Cl<sub>2</sub>). The product was analyzed by HPLC to determine the enantiomeric excess: 85% ee (CHIRALPAK AD-H, hexane/*i*-PrOH = 65/35, detector: 254 nm, T = 25 °C, flow rate: 1 mL/min), *t*<sub>1</sub> (minor) = 167.7 min, *t*<sub>2</sub> (major) = 202.2 min.

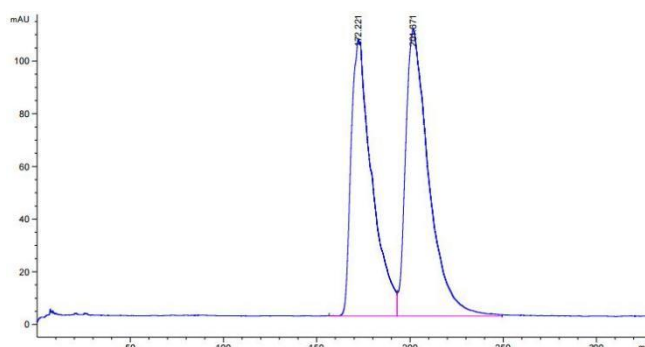

| Peak | RetTime | Area      | Height    | Area    |
|------|---------|-----------|-----------|---------|
| 1    | 172.221 | 8.11300e4 | 105.11188 | 46.3640 |
| 2    | 201.671 | 9.38550e4 | 109.02621 | 53.6360 |

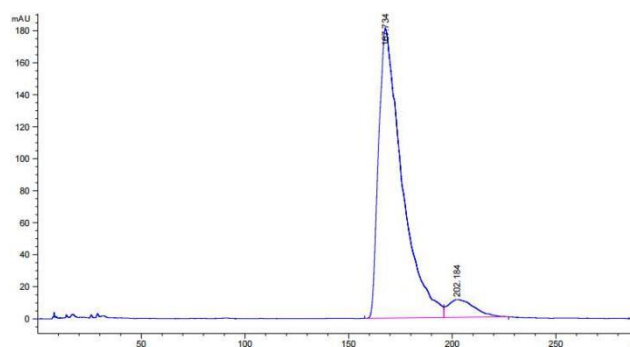

| Peak | RetTime | Area       | Height    | Area    |
|------|---------|------------|-----------|---------|
| 1    | 167.734 | 1.41512e5  | 181.24104 | 93.4785 |
| 2    | 202.184 | 9872.52734 | 11.16241  | 6.5215  |

**(R)-benzyl 2-(2-(7-methylquinolin-8-yl)-1,1-dioxido-2H-thieno[1,2]thiazin-3-yl)acetate (4ra).**

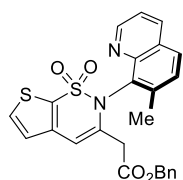

Yield: 48.8 mg (51%). White solid, mp: 165-166 °C. <sup>1</sup>H NMR (600 MHz, CDCl<sub>3</sub>) δ

8.84 (dd, *J* = 4.2, 1.7 Hz, 1H), 8.07 (dd, *J* = 8.2, 1.7 Hz, 1H), 7.73 (d, *J* = 8.4 Hz, 1H), 7.53 (d, *J* = 5.1 Hz, 1H), 7.37 (d, *J* = 8.4 Hz, 1H), 7.35 – 7.31 (m, 1H), 7.30 – 7.26 (m,

3H), 7.13 – 7.07 (m, 3H), 6.64 (s, 1H), 4.82 – 4.70 (m, 2H), 3.31 – 3.19 (m, 2H), 2.26 (s, 3H). <sup>13</sup>C NMR (151 MHz, CDCl<sub>3</sub>) δ 168.6, 151.6, 147.0, 142.8, 141.3, 136.7, 135.8, 135.2, 130.8, 129.6, 129.4, 128.7, 128.5, 128.3, 128.2, 127.7, 127.5, 125.4, 121.2, 108.2, 66.7, 39.3, 18.7. HRMS (ESI): *m/z* [M+H]<sup>+</sup> calcd for [C<sub>25</sub>H<sub>21</sub>N<sub>2</sub>O<sub>4</sub>S<sub>2</sub>]<sup>+</sup> requires 477.0937, found 477.0933. [α]<sub>D</sub><sup>25</sup> = -89 (c = 0.1, CH<sub>2</sub>Cl<sub>2</sub>).

The product was analyzed by HPLC to determine the enantiomeric excess: 85% ee (CHIRALPAK AD-H, hexane/*i*-PrOH =65/35, detector: 254 nm, T = 25 °C, flow rate: 1 mL/min),  $t_1$  (minor) = 19.4 min,  $t_2$  (major) = 21.8 min.

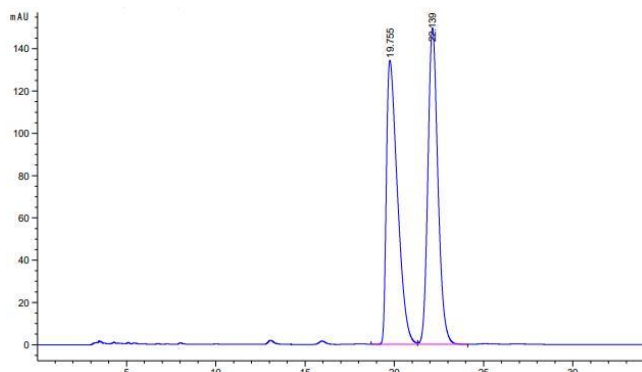

| Peak | RetTime | Area       | Height    | Area    |
|------|---------|------------|-----------|---------|
| 1    | 19.755  | 5796.33057 | 134.36237 | 49.8560 |
| 2    | 22.139  | 5829.80664 | 149.63606 | 50.1440 |

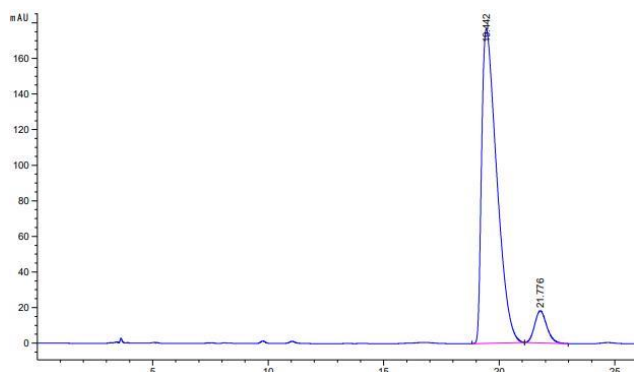

| Peak | RetTime | Area       | Height    | Area    |
|------|---------|------------|-----------|---------|
| 1    | 19.442  | 8009.98291 | 176.70677 | 92.4505 |
| 2    | 21.776  | 654.09894  | 18.02732  | 7.5495  |

**(*R*)-benzyl 2-(2-(7-methylquinolin-8-yl)-1,1-dioxido-2*H*-naphtho[1,2]thiazin-3-yl)acetate (4sa).**

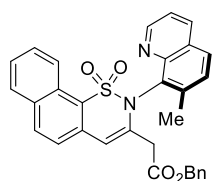

Yield: 58.7 mg (56%). Red solid, mp: 124-125 °C.  $^1\text{H NMR}$  (600 MHz,  $\text{CDCl}_3$ )  $\delta$  8.93 (d,  $J = 8.4$  Hz, 1H), 8.76 (d,  $J = 4.4, 1.8$  Hz, 1H), 8.07 (dd,  $J = 8.3, 1.7$  Hz, 1H), 8.01 (d,  $J = 8.5$  Hz, 1H), 7.89 (d,  $J = 7.6, 1.8$  Hz, 1H), 7.75 (d,  $J = 8.4$  Hz, 1H), 7.58

– 7.47 (m, 2H), 7.46 (d,  $J = 8.4$  Hz, 1H), 7.38 (d,  $J = 8.4$  Hz, 1H), 7.33 – 7.27 (m, 4H), 7.17 – 7.11 (m, 2H), 6.69 (s, 1H), 4.85 – 4.73 (m, 2H), 3.55 – 3.06 (m, 2H), 2.29 (s, 3H).  $^{13}\text{C NMR}$  (151 MHz,  $\text{CDCl}_3$ )  $\delta$  168.5, 151.6, 146.9, 142.6, 137.3, 135.7, 135.2, 133.2, 132.9, 132.2, 131.5, 129.4, 129.4, 128.5, 128.4, 128.3, 128.2, 128.1, 127.4, 127.2, 126.4, 126.4, 125.2, 123.9, 121.2, 112.2, 66.7, 39.5, 18.9.

**HRMS** (ESI):  $m/z$   $[\text{M}+\text{H}]^+$  calcd for  $[\text{C}_{31}\text{H}_{25}\text{N}_2\text{O}_4\text{S}]^+$  requires 521.1530, found 521.1508.  $[\alpha]_{\text{D}}^{25} = -86$  ( $c = 0.1, \text{CH}_2\text{Cl}_2$ ). The product was analyzed by HPLC to determine the enantiomeric excess: 95% ee (CHIRALPAK AD-H, hexane/*i*-PrOH =65/35, detector: 254 nm, T = 25 °C, flow rate: 1 mL/min),  $t_1$  (minor) = 29.8 min,  $t_2$  (major) = 48.7 min.

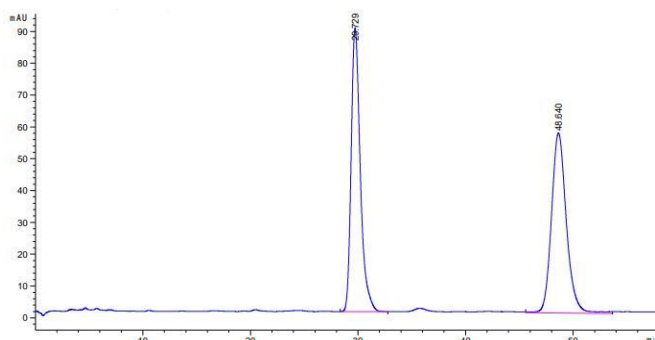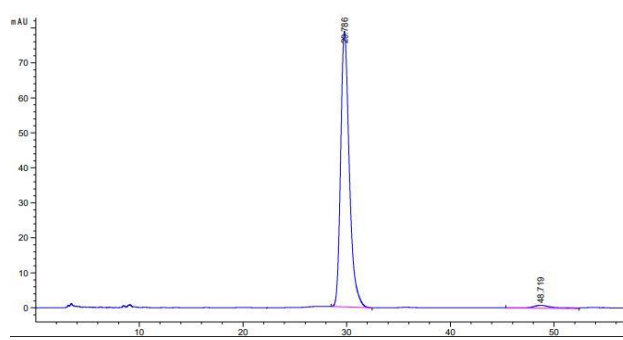



| Peak | RetTime | Area       | Height   | Area    |
|------|---------|------------|----------|---------|
| 1    | 29.729  | 5249.31836 | 89.10143 | 49.0093 |
| 2    | 48.640  | 5461.54150 | 56.54790 | 50.9907 |

| Peak | RetTime | Area       | Height     | Area    |
|------|---------|------------|------------|---------|
| 1    | 29.786  | 4555.93506 | 78.72048   | 97.6171 |
| 2    | 48.719  | 111.21181  | 8.18547e-1 | 2.3829  |

**(R)-benzyl 2-(2-(7-methylquinolin-8-yl)-1,1-dioxido-8-oxo-2H,8H-chromeno[1,2]thiazin-3-yl)acetate (4ta).**

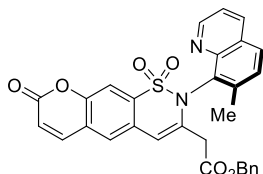

Yield: 83.3 mg (77%). White solid, mp: 123-124 °C. <sup>1</sup>H NMR (600 MHz,

CDCl<sub>3</sub>) δ 8.63 (dd, *J* = 4.2, 1.7 Hz, 1H), 8.07 (dd, *J* = 8.2, 1.7 Hz, 1H), 7.94 (s,

1H), 7.76 (d, *J* = 8.4 Hz, 1H), 7.70 (d, *J* = 9.5 Hz, 1H), 7.41 (d, *J* = 8.4 Hz, 1H),

7.35 (s, 1H), 7.34 – 7.27 (m, 4H), 7.14 (dd, *J* = 6.6, 2.8 Hz, 2H), 6.64 (s, 1H), 6.43 (d, *J* = 9.5 Hz, 1H),

4.85 – 4.71 (m, 2H), 3.30 – 3.14 (m, 2H), 2.41 (s, 3H). <sup>13</sup>C NMR (151 MHz, CDCl<sub>3</sub>) δ 168.0, 159.8,

155.6, 151.4, 146.5, 142.6, 142.5, 139.9, 136.4, 135.8, 135.1, 130.8, 129.6, 129.4, 128.8, 128.5, 128.4,

128.3, 127.4, 121.9, 121.3, 118.2, 116.9, 114.1, 111.3, 66.9, 39.8, 19.1. HRMS (ESI): *m/z*

[*M*+H]<sup>+</sup> calcd for [C<sub>30</sub>H<sub>23</sub>N<sub>2</sub>O<sub>6</sub>S]<sup>+</sup> requires 539.1271, found 539.1277. [α]<sub>D</sub><sup>25</sup> = -132 (*c* = 0.1, CH<sub>2</sub>Cl<sub>2</sub>).

The product was analyzed by HPLC to determine the enantiomeric excess: 85% ee (CHIRALPAK IB-

H, hexane/*i*-PrOH = 80/20, detector: 254 nm, T = 25 °C, flow rate: 1 mL/min), *t*<sub>1</sub> (minor) = 55.1 min,

*t*<sub>2</sub> (major) = 67.5 min.

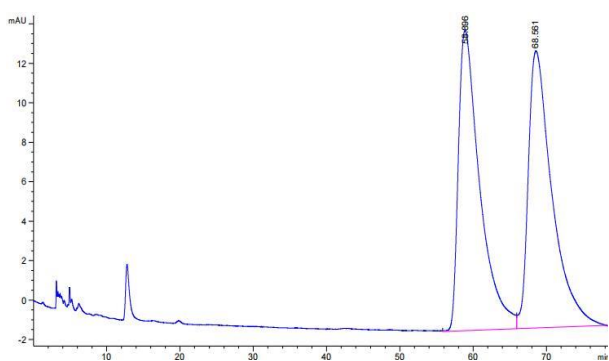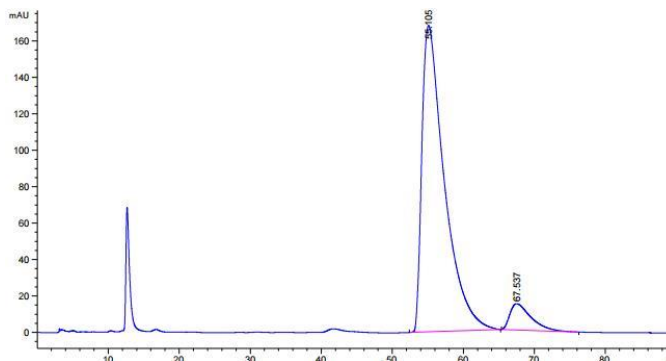

| Peak | RetTime | Area       | Height   | Area    |
|------|---------|------------|----------|---------|
| 1    | 58.896  | 3091.67700 | 15.22076 | 49.3900 |
| 2    | 68.561  | 3168.04443 | 14.04732 | 50.6100 |

| Peak | RetTime | Area       | Height    | Area    |
|------|---------|------------|-----------|---------|
| 1    | 55.105  | 3.70132e4  | 168.10942 | 92.5816 |
| 2    | 67.537  | 2965.80298 | 14.39145  | 7.4184  |

**(R)-benzyl 2-(2-(7-ethylquinolin-8-yl)-6-methyl-1,1-dioxido-2H-benzo[1,2]thiazin-3-yl)acetate**

**(4ua).**

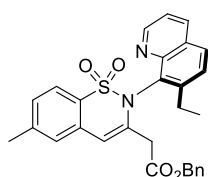

Yield: 79.5 mg (80%). White solid, mp: 135-136 °C. <sup>1</sup>H NMR (600 MHz, CDCl<sub>3</sub>)

δ 8.71 (dd, *J* = 4.2, 1.7 Hz, 1H), 8.03 (dd, *J* = 8.2, 1.7 Hz, 1H), 7.75 (d, *J* = 8.5 Hz,

1H), 7.68 (d, *J* = 7.9 Hz, 1H), 7.43 (d, *J* = 8.5 Hz, 1H), 7.31 – 7.22 (m, 6H), 7.15 –

7.01 (m, 2H), 6.53 (s, 1H), 4.81 – 4.66 (m, 2H), 3.45 – 3.06 (m, 2H), 2.67 – 2.54 (m, 2H), 2.46 (s, 3H), 1.15 (t,  $J = 7.6$  Hz, 3H).  $^{13}\text{C}$  NMR (151 MHz,  $\text{CDCl}_3$ )  $\delta$  168.6, 151.4, 147.8, 147.0, 142.1, 137.0, 135.6, 135.3, 133.1, 130.6, 129.7, 128.5, 128.4, 128.2, 128.1, 127.5, 127.3, 127.2, 121.2, 111.7, 66.6, 39.5, 24.9, 21.7, 14.3. **HRMS** (ESI):  $m/z$   $[\text{M}+\text{H}]^+$  calcd for  $[\text{C}_{29}\text{H}_{27}\text{N}_2\text{O}_4\text{S}]^+$  requires 499.1686, found 499.1687.  $[\alpha]_{\text{D}}^{25} = -147$  ( $c = 0.1$ ,  $\text{CH}_2\text{Cl}_2$ ). The product was analyzed by HPLC to determine the enantiomeric excess: 94% ee (CHIRALPAK AD-H, hexane/*i*-PrOH = 65/35, detector: 254 nm,  $T = 25$  °C, flow rate: 1 mL/min),  $t_1$  (minor) = 24.3 min,  $t_2$  (major) = 36.9 min.

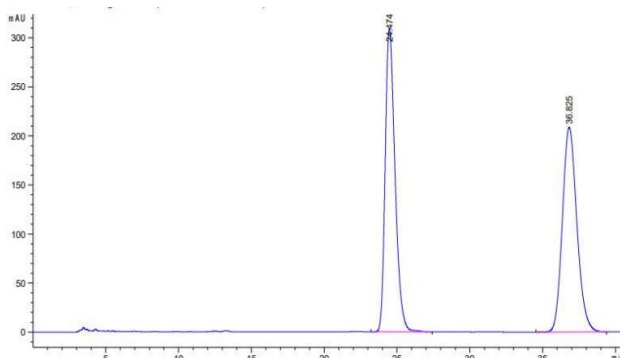

| Peak | RetTime | Area      | Height    | Area    |
|------|---------|-----------|-----------|---------|
| 1    | 24.474  | 1.44834e4 | 308.95447 | 50.0705 |
| 2    | 36.825  | 1.44427e4 | 208.74979 | 49.9295 |

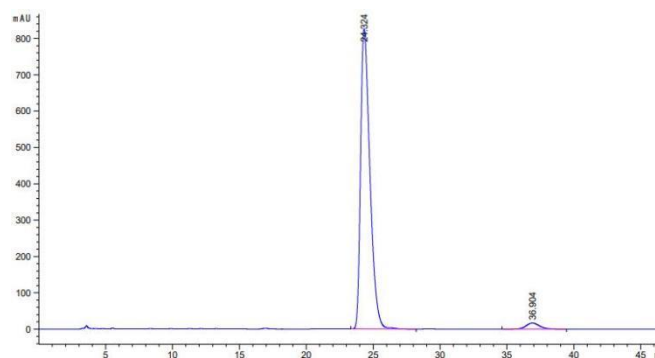

| Peak | RetTime | Area       | Height    | Area    |
|------|---------|------------|-----------|---------|
| 1    | 24.324  | 4.00546e4  | 826.33582 | 97.1815 |
| 2    | 36.904  | 1161.66870 | 16.71033  | 2.8185  |

**(R)-benzyl 2-(2-(7-butylquinolin-8-yl)-6-methyl-1,1-dioxido-2H-benzo[1,2]thiazin-3-yl)acetate**

**(4va).**

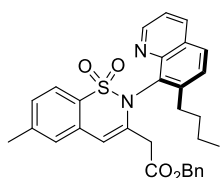

Yield: 95.5 mg (91%). White solid, mp: 117-118 °C.  $^1\text{H}$  NMR (600 MHz,  $\text{CDCl}_3$ )  $\delta$  8.81 (dd,  $J = 4.2, 1.7$  Hz, 1H), 8.04 (dd,  $J = 8.3, 1.7$  Hz, 1H), 7.73 (d,  $J = 8.5$  Hz, 1H), 7.69 (d,  $J = 7.9$  Hz, 1H), 7.37 (d,  $J = 8.5$  Hz, 1H), 7.32 – 7.23 (m, 6H), 7.13 – 7.07 (m, 2H), 6.55 (s, 1H), 4.82 – 4.70 (m, 2H), 3.40 – 3.04 (m, 2H), 2.46 (s, 3H), 2.44 – 2.36 (t,  $J = 7.6$  Hz, 2H), 1.56 – 1.39 (m, 2H), 1.09 (dt,  $J = 13.3, 9.1, 7.4, 5.9$  Hz, 1H), 0.93 (dt,  $J = 13.5, 9.2, 7.6, 6.1$  Hz, 1H), 0.70 (t,  $J = 7.4$  Hz, 3H).  $^{13}\text{C}$  NMR (151 MHz,  $\text{CDCl}_3$ )  $\delta$  168.6, 151.5, 147.2, 146.7, 142.1, 137.0, 135.7, 135.3, 133.0, 130.1, 130.0, 129.5, 128.5, 128.4, 128.2, 128.1, 128.0, 127.4, 127.3, 121.2, 121.1, 112.0, 66.6, 39.4, 32.6, 31.8, 23.0, 21.7, 13.7. **HRMS** (ESI):  $m/z$   $[\text{M}+\text{H}]^+$  calcd for  $[\text{C}_{31}\text{H}_{31}\text{N}_2\text{O}_4\text{S}]^+$  requires 527.1999, found 527.1993.  $[\alpha]_{\text{D}}^{25} = -99$  ( $c = 0.1$ ,  $\text{CH}_2\text{Cl}_2$ ). The product was analyzed by HPLC to determine the enantiomeric excess: 95% ee (CHIRALPAK AD-H, hexane/*i*-

PrOH =65/35, detector: 254 nm, T = 25 °C, flow rate: 1 mL/min, t<sub>1</sub> (minor) = 21.7 min, t<sub>2</sub> (major) = 36.8 min.

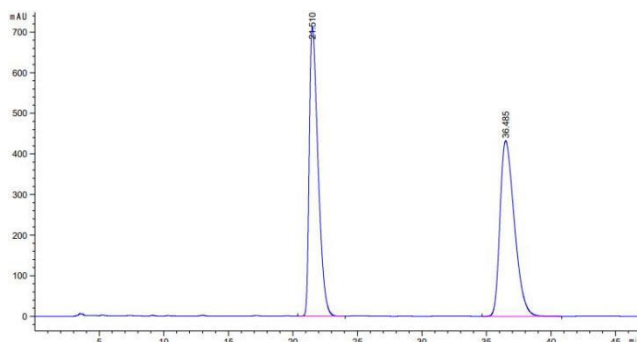

| Peak | RetTime | Area      | Height    | Area    |
|------|---------|-----------|-----------|---------|
| 1    | 21.510  | 3.36894e4 | 712.76801 | 50.1588 |
| 2    | 36.485  | 3.34762e4 | 432.26932 | 49.8412 |

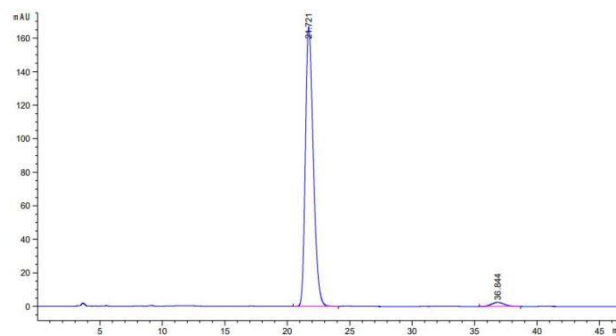

| Peak | RetTime | Area       | Height    | Area    |
|------|---------|------------|-----------|---------|
| 1    | 21.721  | 7336.59326 | 166.78816 | 97.6991 |
| 2    | 36.844  | 172.78694  | 2.43073   | 2.3009  |

**(R)-benzyl 2-(2-(7-chloroquinolin-8-yl)-6-methyl-1,1-dioxido-2H-benzo[1,2]thiazin-3-yl)acetate (4wa).**

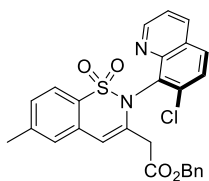

Yield: 80.3 mg (80%). White solid, mp: 150-151 °C. <sup>1</sup>H NMR (600 MHz, CDCl<sub>3</sub>)

δ 8.69 (dd, *J* = 4.2, 1.7 Hz, 1H), 7.96 (dd, *J* = 8.3, 1.7 Hz, 1H), 7.63 (d, *J* = 8.8 Hz, 1H), 7.59 (d, *J* = 7.9 Hz, 1H), 7.38 (d, *J* = 8.8 Hz, 1H), 7.26 – 7.21 (m, 1H), 7.20 –

7.15 (m, 4H), 7.14 (s, 1H), 7.11 – 7.04 (m, 2H), 6.50 (s, 1H), 4.75 – 4.64 (m, 2H), 3.45 – 2.95 (m, 2H), 2.36 (s, 3H). <sup>13</sup>C NMR (151 MHz, CDCl<sub>3</sub>) δ 167.2, 151.3, 146.5, 141.1, 137.2, 134.9, 134.8, 134.2, 131.9, 130.0, 129.5, 127.6, 127.4, 127.2, 126.8, 126.5, 126.4, 120.9, 120.0, 111.9, 65.7, 38.4, 20.6.

**HRMS** (ESI): *m/z* [M+H]<sup>+</sup> calcd for [C<sub>27</sub>H<sub>22</sub>ClN<sub>2</sub>O<sub>4</sub>S]<sup>+</sup> requires 505.0983, found 505.0991. [α]<sub>D</sub><sup>25</sup> = -134 (c = 0.1, CH<sub>2</sub>Cl<sub>2</sub>). The product was analyzed by HPLC to determine the enantiomeric excess: 97% ee (CHIRALPAK AD-H, hexane/*i*-PrOH =70/30, detector: 254 nm, T = 25 °C, flow rate: 1 mL/min), t<sub>1</sub> (minor) = 58.7 min, t<sub>2</sub> (major) = 62.8 min.

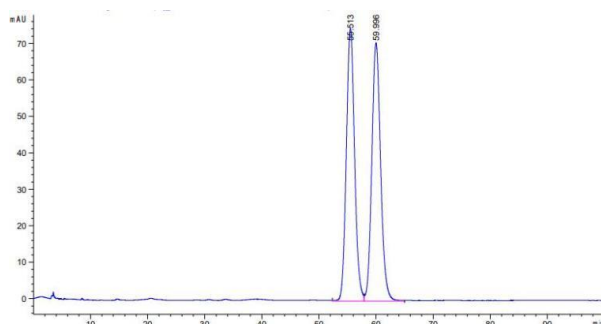

| Peak | RetTime | Area       | Height   | Area    |
|------|---------|------------|----------|---------|
| 1    | 55.513  | 7515.62012 | 74.80699 | 49.7565 |

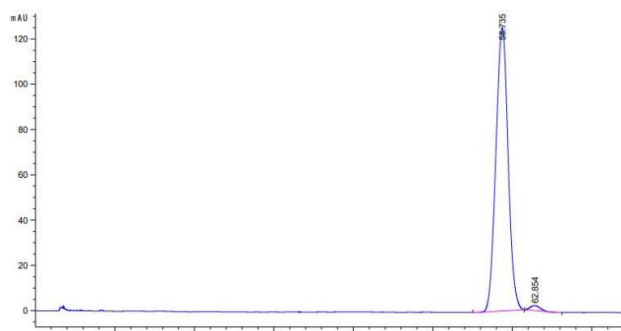

| Peak | RetTime | Area      | Height    | Area    |
|------|---------|-----------|-----------|---------|
| 1    | 58.735  | 1.33908e4 | 125.15952 | 98.5071 |

|   |        |            |          |         |
|---|--------|------------|----------|---------|
| 2 | 59.996 | 7589.18701 | 70.83524 | 50.2435 |
|---|--------|------------|----------|---------|

|   |        |           |         |        |
|---|--------|-----------|---------|--------|
| 2 | 62.819 | 202.94650 | 2.25859 | 1.4929 |
|---|--------|-----------|---------|--------|

**(R)-benzyl 2-(2-(7-bromoquinolin-8-yl)-6-methyl-1,1-dioxido-2H-benzo[1,2]thiazin-3-yl)acetate (4xa).**

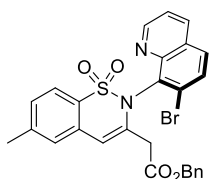

Yield: 73.4 mg (67%). White solid, mp: 151-152 °C. <sup>1</sup>H NMR (600 MHz, CDCl<sub>3</sub>)

δ 8.82 (dd, *J* = 6.1, 3.1 Hz, 1H), 8.10 (dd, *J* = 8.3, 1.7 Hz, 1H), 7.72 – 7.65 (m, 3H),

7.42 – 7.36 (m, 1H), 7.33 – 7.24 (m, 5H), 7.20 – 7.12 (m, 2H), 6.62 (s, 1H), 4.84 –

4.73 (m, 2H), 3.50 – 3.11 (m, 2H), 2.48 (s, 3H). <sup>13</sup>C NMR (151 MHz, CDCl<sub>3</sub>) δ 168.3, 152.3, 147.8,

142.1, 135.9, 135.6, 135.3, 133.2, 133.0, 130.8, 130.7, 130.5, 129.1, 128.6, 128.4, 128.2, 128.1, 128.0,

127.4, 122.1, 121.0, 113.1, 66.7, 39.4, 21.7. HRMS (ESI): *m/z* [M+H]<sup>+</sup> calcd for [C<sub>27</sub>H<sub>22</sub>BrN<sub>2</sub>O<sub>4</sub>S]<sup>+</sup>

requires 549.0478, found 549.0489. [α]<sub>D</sub><sup>25</sup> = -132 (c = 0.1, CH<sub>2</sub>Cl<sub>2</sub>). The product was analyzed by

HPLC to determine the enantiomeric excess: 93% ee (CHIRALPAK AD-H, hexane/*i*-PrOH = 65/35,

detector: 254 nm, T = 25 °C, flow rate: 1 mL/min), *t*<sub>1</sub> (minor) = 48.9 min, *t*<sub>2</sub> (major) = 54.2 min.

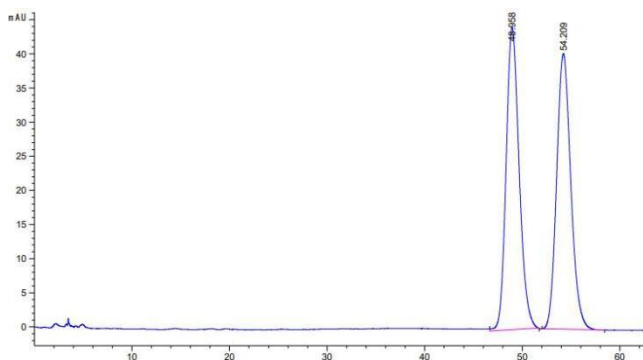

| Peak | RetTime | Area       | Height   | Area    |
|------|---------|------------|----------|---------|
| 1    | 48.958  | 4100.62939 | 44.25488 | 50.1867 |
| 2    | 54.209  | 4070.12183 | 40.37758 | 49.8133 |

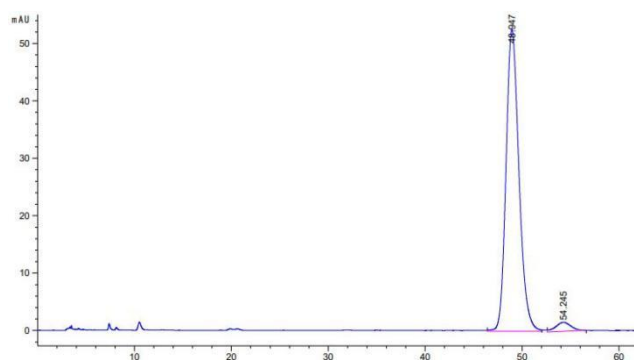

| Peak | RetTime | Area       | Height   | Area    |
|------|---------|------------|----------|---------|
| 1    | 48.947  | 4871.27979 | 52.54170 | 96.5882 |
| 2    | 54.245  | 172.06651  | 1.56927  | 3.4118  |

**(R)-benzyl 2-(6-methyl-1,1-dioxido-2-(7-phenylquinolin-8-yl)-2H-benzo[1,2]thiazin-3-yl)acetate (4ya).**

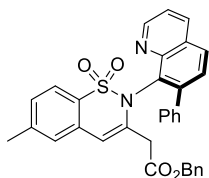

Yield: 65.3 mg (58%). Yellow solid, mp: 124-125 °C. <sup>1</sup>H NMR (600 MHz, CDCl<sub>3</sub>)

δ 9.00 – 8.97 (d, 1H), 8.19 (d, *J* = 8.3 Hz, 1H), 7.90 (d, *J* = 8.4, 2.1 Hz, 1H), 7.64

(d, *J* = 8.0, 2.0 Hz, 1H), 7.50 (d, *J* = 8.4 Hz, 1H), 7.46 – 7.41 (m, 1H), 7.32 (dd, *J*

= 5.0, 2.5 Hz, 3H), 7.27 (d, *J* = 8.1 Hz, 1H), 7.21 (d, *J* = 7.0 Hz, 4H), 7.06 (t, *J* = 7.4 Hz, 1H), 6.94 (d,

*J* = 8.0 Hz, 3H), 6.20 (s, 1H), 4.88 – 4.79 (m, 2H), 3.43 – 2.99 (m, 2H), 2.45 (s, 3H). <sup>13</sup>C NMR (151

MHz, CDCl<sub>3</sub>) δ 168.4, 151.8, 147.1, 144.3, 141.5, 137.7, 136.2, 135.8, 135.4, 132.8, 131.3, 130.0,

129.4, 129.0, 128.5, 128.4, 128.3, 128.2, 128.1, 128.0, 127.5, 127.3, 127.1, 121.9, 121.4, 112.2, 66.7, 39.3, 21.6. **HRMS** (ESI):  $m/z$   $[M+H]^+$  calcd for  $[C_{33}H_{27}N_2O_4S]^+$  requires 547.1686, found 547.1688.  $[\alpha]_D^{25} = +79$  ( $c = 0.1$ ,  $CH_2Cl_2$ ). The product was analyzed by HPLC to determine the enantiomeric excess: 96% ee (CHIRALPAK AD-H, hexane/*i*-PrOH =65/35, detector: 254 nm,  $T = 25$  °C, flow rate: 1 mL/min),  $t_1$  (minor) = 35.4 min,  $t_2$  (major) = 42.8 min.

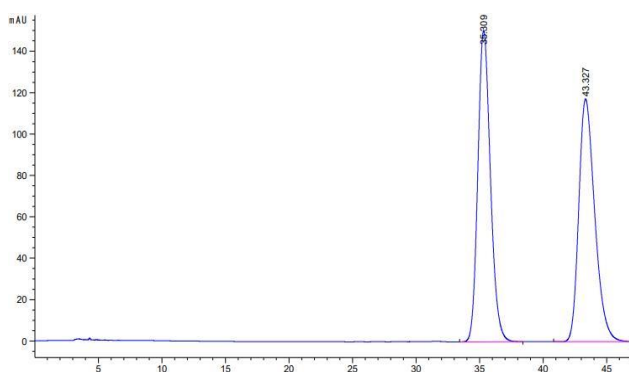

| Peak | RetTime | Area      | Height    | Area    |
|------|---------|-----------|-----------|---------|
| 1    | 35.309  | 1.03376e4 | 150.39685 | 50.2444 |
| 2    | 43.327  | 1.02370e4 | 117.28445 | 49.7556 |

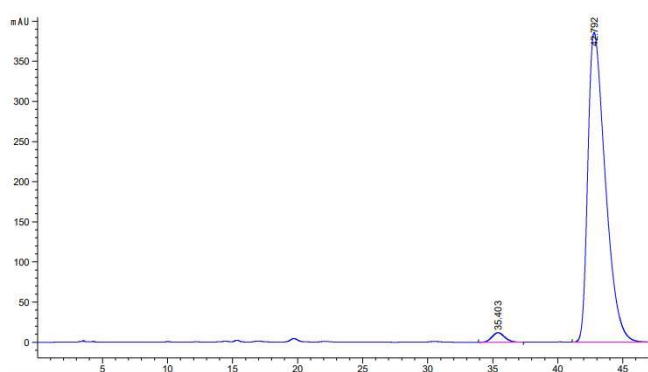

| Peak | RetTime | Area      | Height    | Area    |
|------|---------|-----------|-----------|---------|
| 1    | 35.403  | 806.93188 | 11.88482  | 2.1948  |
| 2    | 42.792  | 3.59584e4 | 385.85895 | 97.8052 |

**(R)-benzyl 2-(2-(7-(4-methoxyphenyl)quinolin-8-yl)-6-methyl-1,1-dioxido-2H-benzo[1,2]thiazin-3-yl)acetate (4za).**

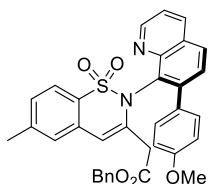

Yield: 101.0 mg (88%). White solid, mp: 127-128 °C.  $^1H$  NMR (600 MHz,  $CDCl_3$ )  $\delta$  8.95 (dd,  $J = 4.2, 1.7$  Hz, 1H), 8.16 (dd,  $J = 8.3, 1.7$  Hz, 1H), 7.86 (d,  $J = 8.4$  Hz, 1H), 7.59 (d,  $J = 8.0$  Hz, 1H), 7.47 (d,  $J = 8.4$  Hz, 1H), 7.43 – 7.38 (m, 1H), 7.32 – 7.25 (m, 3H), 7.24 (d,  $J = 7.6$  Hz, 1H), 7.21 – 7.14 (m, 2H), 7.13 – 7.08 (d,  $J = 8.4$  Hz, 2H), 6.95 (s, 1H), 6.52 – 6.33 (d,  $J = 8.0$  Hz, 2H), 6.21 (s, 1H), 4.85 – 4.73 (m, 2H), 3.65 (s, 3H), 3.39 – 3.00 (m, 2H), 2.44 (s, 3H).  $^{13}C$  NMR (151 MHz,  $CDCl_3$ )  $\delta$  168.4, 159.0, 151.8, 147.1, 144.3, 141.4, 136.5, 135.8, 135.4, 132.9, 131.4, 130.1, 130.0, 129.7, 129.3, 129.2, 128.4, 128.3, 128.2, 128.1, 128.0, 127.0, 121.7, 121.4, 112.7, 112.2, 66.6, 55.0, 39.3, 21.6. **HRMS** (ESI):  $m/z$   $[M+H]^+$  calcd for  $[C_{34}H_{29}N_2O_5S]^+$  requires 577.1792, found 577.1790.  $[\alpha]_D^{25} = +94$  ( $c = 0.1$ ,  $CH_2Cl_2$ ). The product was analyzed by HPLC to determine the enantiomeric excess: 96% ee (CHIRALPAK AD-H, hexane/*i*-PrOH =65/35, detector: 254 nm,  $T = 25$  °C, flow rate: 1 mL/min),  $t_1$  (minor) = 47.0 min,  $t_2$  (major) = 52.2 min.

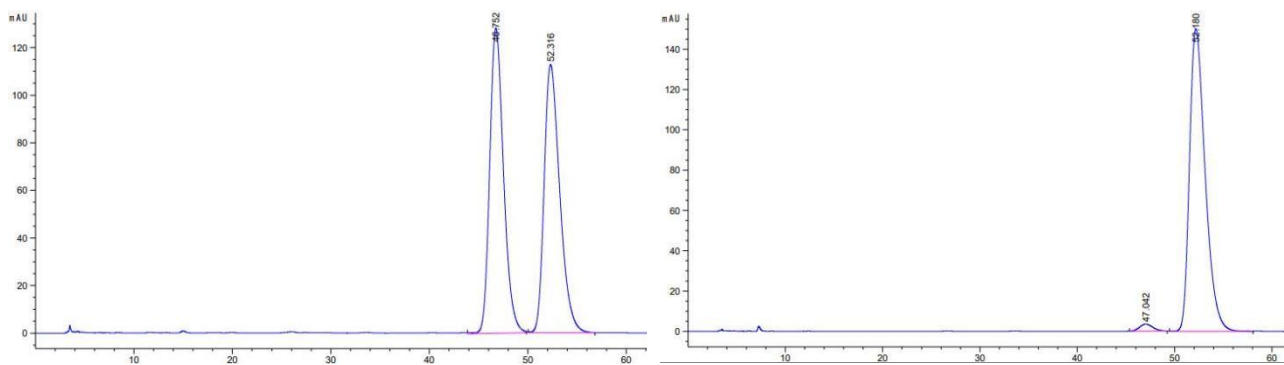

| Peak | RetTime | Area      | Height    | Area    |
|------|---------|-----------|-----------|---------|
| 1    | 46.752  | 1.24812e4 | 128.29118 | 50.1418 |
| 2    | 52.316  | 1.24106e4 | 112.71845 | 49.8582 |

| Peak | RetTime | Area      | Height    | Area    |
|------|---------|-----------|-----------|---------|
| 1    | 47.042  | 341.75574 | 3.53945   | 1.9961  |
| 2    | 52.180  | 1.67795e4 | 150.21198 | 98.0039 |

**(R)-benzyl (E)-2-(6-methyl-1,1-dioxido-2-(7-styrylquinolin-8-yl)-2H-benzo[1,2]thiazin-3-yl)acetate (4zaa).**

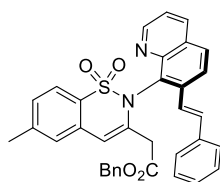

Yield: 78.3 mg (70%). White solid, mp: 190-191 °C. <sup>1</sup>H NMR (600 MHz, CDCl<sub>3</sub>)

δ 8.87 (dd, *J* = 4.2, 1.7 Hz, 1H), 8.10 (dd, *J* = 8.2, 1.8 Hz, 1H), 7.88 (d, *J* = 8.7 Hz, 1H), 7.82 (d, *J* = 8.7 Hz, 1H), 7.76 (d, *J* = 7.9 Hz, 1H), 7.39 – 7.33 (m, 3H), 7.28 (d, *J* = 5.8 Hz, 1H), 7.26 – 7.18 (m, 5H), 7.16 (d, *J* = 16.3 Hz, 1H), 7.10 – 7.06 (m,

2H), 7.06 – 7.03 (m, 2H), 7.01 (d, *J* = 16.3 Hz, 1H), 6.64 (s, 1H), 4.85 – 4.52 (m, 2H), 3.44 – 2.99 (m, 2H), 2.57 (s, 3H). <sup>13</sup>C NMR (151 MHz, CDCl<sub>3</sub>) δ 168.4, 151.9, 147.4, 142.3, 140.1, 137.5, 136.6, 135.7, 135.3, 133.4, 133.0, 130.6, 129.7, 129.6, 128.8, 128.5, 128.4, 128.3, 128.1, 127.4, 127.0, 123.3, 123.2, 121.7, 121.6, 112.1, 66.6, 39.6, 21.8. HRMS (ESI): *m/z* [M+H]<sup>+</sup> calcd for [C<sub>35</sub>H<sub>29</sub>N<sub>2</sub>O<sub>4</sub>S]<sup>+</sup> requires 573.1843, found 573.1851. [α]<sub>D</sub><sup>25</sup> = +112 (*c* = 0.1, CH<sub>2</sub>Cl<sub>2</sub>). The product was analyzed by HPLC to determine the enantiomeric excess: 83% ee (CHIRALPAK IB-H, hexane/*i*-PrOH = 80/20, detector: 254 nm, T = 25 °C, flow rate: 1 mL/min), *t*<sub>1</sub> (minor) = 47.5 min, *t*<sub>2</sub> (major) = 60.4 min.

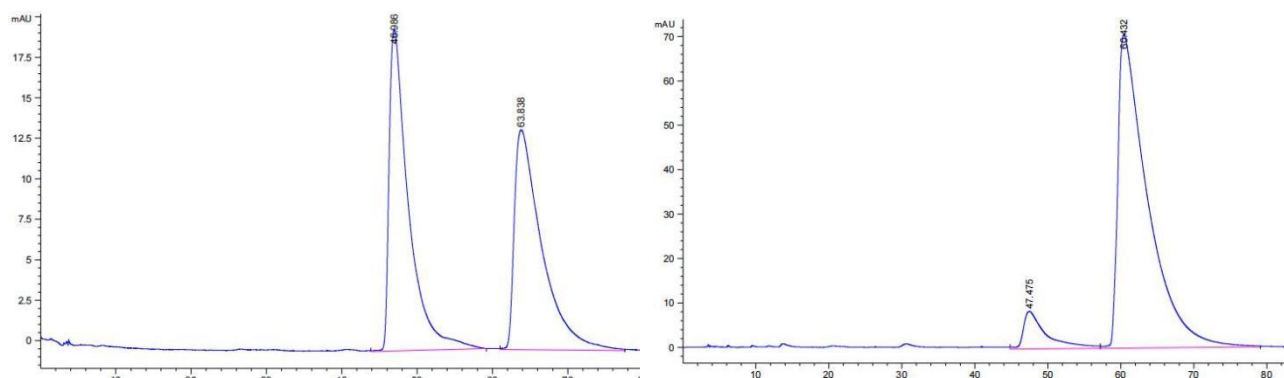

| Peak | RetTime | Area       | Height   | Area    |
|------|---------|------------|----------|---------|
| 1    | 46.986  | 3555.08887 | 19.84567 | 50.9436 |

| Peak | RetTime | Area       | Height  | Area   |
|------|---------|------------|---------|--------|
| 1    | 47.475  | 1848.60315 | 8.45595 | 8.4624 |

|   |        |            |          |         |   |        |           |          |         |
|---|--------|------------|----------|---------|---|--------|-----------|----------|---------|
| 2 | 63.838 | 3423.38428 | 13.57840 | 49.0564 | 2 | 60.432 | 1.99962e4 | 70.53047 | 91.5376 |
|---|--------|------------|----------|---------|---|--------|-----------|----------|---------|

**(R)-benzyl 2-(6-methyl-1,1-dioxido-2-(7-(thiophen-3-yl)quinolin-8-yl)-2H-benzo[1,2]thiazin-3-yl)acetate (4zba).**

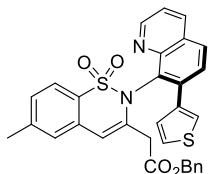

Yield: 90.0 mg (82%). White solid, mp: 161-162 °C. <sup>1</sup>H NMR (600 MHz, CDCl<sub>3</sub>) δ 8.82 (dd, *J* = 4.2, 1.7 Hz, 1H), 8.10 (dd, *J* = 8.3, 1.8 Hz, 1H), 7.82 (d, *J* = 8.5 Hz, 1H), 7.56 (dd, *J* = 20.8, 8.2 Hz, 2H), 7.39 – 7.32 (m, 2H), 7.29 (dd, *J* = 4.9, 1.9 Hz, 3H), 7.24 (d, *J* = 8.1 Hz, 1H), 7.15 – 7.08 (m, 4H), 7.02 (dd, *J* = 4.9, 3.0 Hz, 1H), 6.35 (s, 1H), 4.75 – 4.65 (m, 2H), 3.51 – 3.04 (m, 2H), 2.46 (s, 3H). <sup>13</sup>C NMR (151 MHz, CDCl<sub>3</sub>) δ 168.6, 151.7, 147.1, 141.7, 140.1, 137.7, 136.9, 135.8, 135.3, 132.9, 131.1, 130.2, 129.6, 128.8, 128.5, 128.4, 128.2, 128.1, 127.1, 124.9, 124.9, 121.8, 121.1, 112.3, 66.6, 39.4, 21.7. HRMS (ESI): *m/z* [M+H]<sup>+</sup> calcd for [C<sub>31</sub>H<sub>25</sub>N<sub>2</sub>O<sub>4</sub>S<sub>2</sub>]<sup>+</sup> requires 553.1250, found 553.1243. [α]<sub>D</sub><sup>25</sup> = -274 (c = 0.1, CH<sub>2</sub>Cl<sub>2</sub>). The product was analyzed by HPLC to determine the enantiomeric excess: 94% ee (CHIRALPAK AD-H, hexane/*i*-PrOH = 65/35, detector: 254 nm, T = 25 °C, flow rate: 1 mL/min), t<sub>1</sub> (minor) = 41.4 min, t<sub>2</sub> (major) = 45.6 min.

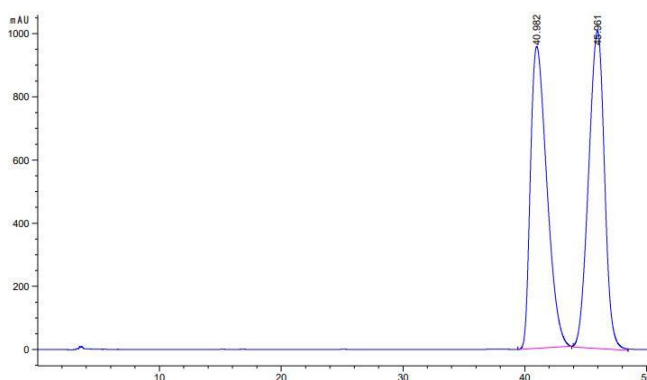

| Peak | RetTime | Area      | Height     | Area    |
|------|---------|-----------|------------|---------|
| 1    | 40.982  | 8.93878e4 | 955.98535  | 49.5634 |
| 2    | 45.961  | 9.09626e4 | 1006.13806 | 50.4366 |

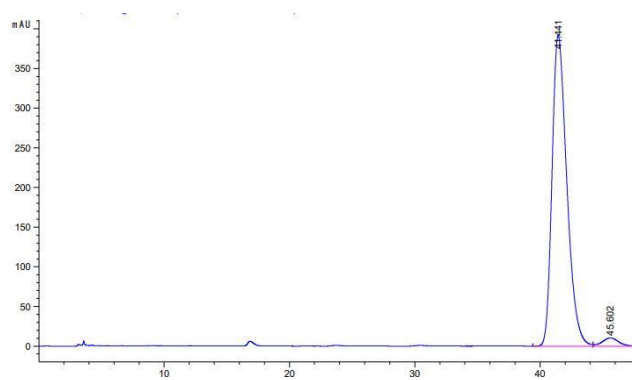

| Peak | RetTime | Area      | Height    | Area    |
|------|---------|-----------|-----------|---------|
| 1    | 41.441  | 3.18461e4 | 391.08441 | 97.1153 |
| 2    | 45.602  | 721.71613 | 9.18075   | 2.8847  |

**(R)-benzyl 2-(2-(5-chloro-7-methylquinolin-8-yl)-6-methyl-1,1-dioxido-2H-benzo[1,2]thiazin-3-yl)acetate (4zca).**

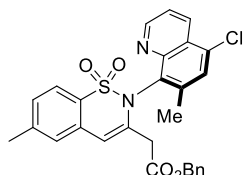

Yield: 92.3 mg (89%). White solid, mp: 128-129 °C. <sup>1</sup>H NMR (600 MHz, CDCl<sub>3</sub>) δ 8.78 (dd, *J* = 4.2, 1.7 Hz, 1H), 8.46 (dd, *J* = 8.5, 1.7 Hz, 1H), 7.70 (d, *J* = 7.9 Hz, 1H), 7.48 (s, 1H), 7.42 – 7.38 (m, 1H), 7.33 – 7.27 (m, 5H), 7.15 – 7.09 (m, 2H), 6.56 (s, 1H), 4.81 – 4.73 (m, 2H), 3.42 – 3.10 (m, 2H), 2.48 (s, 3H), 2.28 (s,

3H).  $^{13}\text{C}$  NMR (151 MHz,  $\text{CDCl}_3$ )  $\delta$  168.6, 152.0, 147.3, 142.9, 142.3, 136.5, 135.1, 133.0, 132.8, 132.7, 130.6, 129.8, 129.2, 128.6, 128.5, 128.3, 128.2, 127.3, 125.4, 121.8, 121.1, 112.2, 66.8, 39.6, 21.7, 18.8. **HRMS** (ESI):  $m/z$   $[\text{M}+\text{H}]^+$  calcd for  $[\text{C}_{28}\text{H}_{24}\text{ClN}_2\text{O}_4\text{S}]^+$  requires 519.1140, found 519.1135.  $[\alpha]_{\text{D}}^{25} = -102$  ( $c = 0.1$ ,  $\text{CH}_2\text{Cl}_2$ ). The product was analyzed by HPLC to determine the enantiomeric excess: 94% ee (CHIRALPAK AD-H, hexane/*i*-PrOH =65/35, detector: 254 nm,  $T = 25$  °C, flow rate: 1 mL/min),  $t_1$  (minor) = 24.9 min,  $t_2$  (major) = 58.9 min.

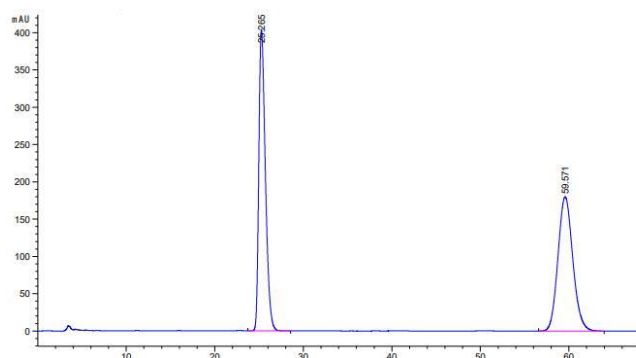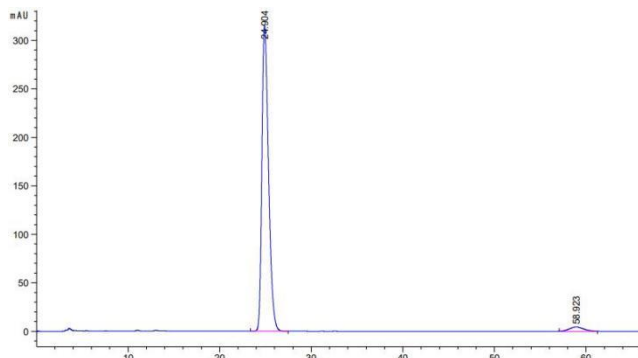

| Peak | RetTime | Area      | Height    | Area    |
|------|---------|-----------|-----------|---------|
| 1    | 25.265  | 2.07593e4 | 403.93463 | 49.8118 |
| 2    | 59.571  | 2.09162e4 | 179.97485 | 50.1882 |

| Peak | RetTime | Area      | Height    | Area    |
|------|---------|-----------|-----------|---------|
| 1    | 24.904  | 1.58497e4 | 315.10645 | 96.8663 |
| 2    | 58.923  | 512.74768 | 4.55417   | 3.1337  |

**(R)-benzyl 2-(2-(5-bromo-7-methylquinolin-8-yl)-6-methyl-1,1-dioxido-2H-benzo[1,2]thiazin-3-yl)acetate (4zda).**

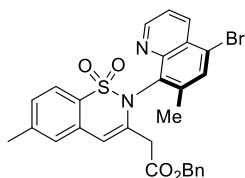

Yield: 99.3 mg (94%). Yellow solid, mp: 123-124 °C.  $^1\text{H}$  NMR (600 MHz,  $\text{CDCl}_3$ )  $\delta$  8.75 (d,  $J = 4.1$ , 1.6 Hz, 1H), 8.42 (d,  $J = 8.5$ , 1.6 Hz, 1H), 7.70 (t,  $J = 4.0$  Hz, 2H), 7.41 – 7.37 (m,  $J = 8.5$ , 4.2 Hz, 1H), 7.36 – 7.26 (m, 5H), 7.16 – 7.10 (m,  $J = 6.7$ , 2.9 Hz, 2H), 6.56 (s, 1H), 4.79 (t,  $J = 1.7$  Hz, 2H), 3.53 – 3.03 (dd, 2H), 2.48 (s, 3H), 2.29 (s, 3H).

$^{13}\text{C}$  NMR (151 MHz,  $\text{CDCl}_3$ )  $\delta$  168.6, 152.0, 147.4, 143.2, 142.3, 136.4, 135.4, 135.1, 133.0, 132.9, 131.3, 129.8, 128.7, 128.5, 128.4, 128.3, 127.3, 126.8, 123.5, 122.2, 121.1, 112., 66.8, 39.6, 21.7, 18.7. **HRMS** (ESI):  $m/z$   $[\text{M}+\text{H}]^+$  calcd for  $[\text{C}_{28}\text{H}_{24}\text{BrN}_2\text{O}_4\text{S}]^+$  requires 563.0635, found 563.0631.  $[\alpha]_{\text{D}}^{25} = -199$  ( $c = 0.1$ ,  $\text{CH}_2\text{Cl}_2$ ). The product was analyzed by HPLC to determine the enantiomeric excess: 94% ee (CHIRALPAK AD-H, hexane/*i*-PrOH =65/35, detector: 254 nm,  $T = 25$  °C, flow rate: 1 mL/min),  $t_1$  (minor) = 26.8 min,  $t_2$  (major) = 73.0 min.



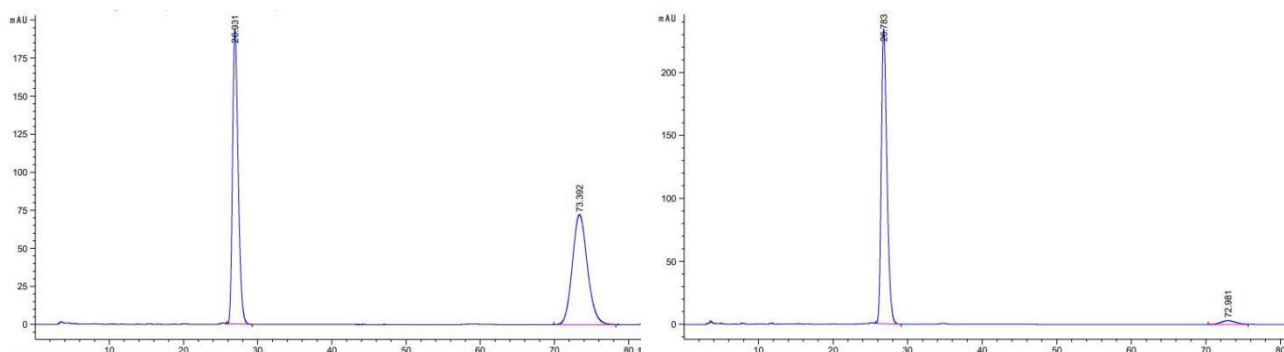

| Peak | RetTime | Area      | Height    | Area    |
|------|---------|-----------|-----------|---------|
| 1    | 26.931  | 1.02011e4 | 193.24823 | 50.0811 |
| 2    | 73.392  | 1.01680e4 | 72.28491  | 49.9189 |

| Peak | RetTime | Area      | Height    | Area    |
|------|---------|-----------|-----------|---------|
| 1    | 26.783  | 1.23018e4 | 234.07170 | 96.8100 |
| 2    | 72.981  | 405.36096 | 2.95859   | 3.1900  |

**(R)-benzyl 2-(2-(5,7-dichloroquinolin-8-yl)-6-methyl-1,1-dioxido-2H-benzo[1,2]thiazin-3-yl)acetate (4zea).**

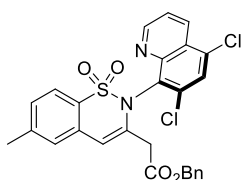

Yield: 54.6 mg (51%). White solid, mp: 172-173 °C. <sup>1</sup>H NMR (600 MHz, CDCl<sub>3</sub>) δ 8.81 (dd, *J* = 4.1, 1.6 Hz, 1H), 8.46 (dd, *J* = 8.5, 1.6 Hz, 1H), 7.66 (d, *J* = 7.9 Hz, 1H), 7.61 (s, 1H), 7.49 – 7.40 (m, 1H), 7.30 – 7.25 (m, 4H), 7.24 (s, 1H), 7.17 – 7.12 (m, 2H), 6.59 (s, 1H), 4.84 – 4.76 (m, 2H), 3.44 – 3.01 (m, 2H), 2.46 (s, 3H). <sup>13</sup>C NMR (151 MHz, CDCl<sub>3</sub>) δ 168.3, 152.9, 147.7, 142.3, 137.9, 135.6, 135.2, 133.8, 133.1, 132.8, 130.5, 130.4, 128.7, 128.5, 128.3, 128.2, 127.7, 127.5, 125.8, 122.6, 121.1, 113.3, 66.9, 39.5, 21.7. HRMS (ESI): *m/z* [M+H]<sup>+</sup> calcd for [C<sub>27</sub>H<sub>21</sub>Cl<sub>2</sub>N<sub>2</sub>O<sub>4</sub>S]<sup>+</sup> requires 539.0594, found 539.0595. [α]<sub>D</sub><sup>25</sup> = -117 (c = 0.1, CH<sub>2</sub>Cl<sub>2</sub>). The product was analyzed by HPLC to determine the enantiomeric excess: 94% ee (CHIRALPAK AD-H, hexane/*i*-PrOH = 65/35, detector: 254 nm, T = 25 °C, flow rate: 1 mL/min), *t*<sub>1</sub> (minor) = 36.0 min, *t*<sub>2</sub> (major) = 59.4 min.

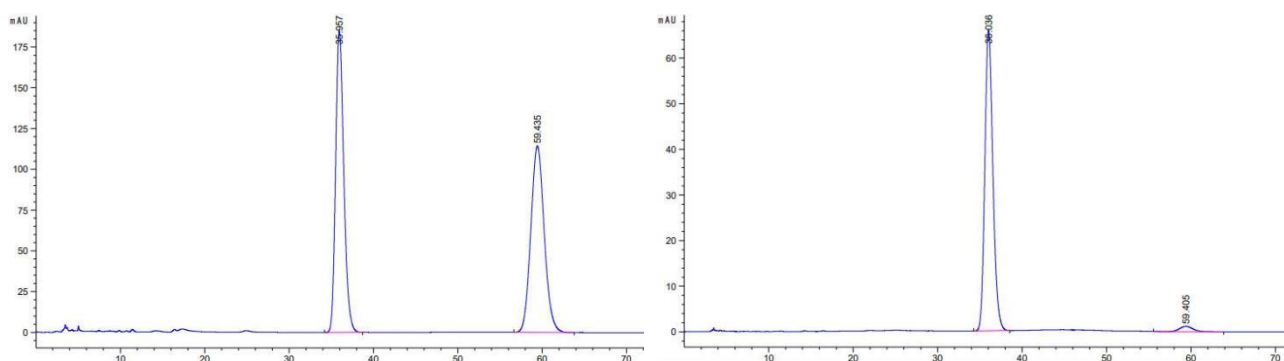

| Peak | RetTime | Area      | Height    | Area    |
|------|---------|-----------|-----------|---------|
| 1    | 35.957  | 1.24563e4 | 184.99911 | 49.5977 |
| 2    | 59.435  | 1.26584e4 | 114.40467 | 50.4023 |

| Peak | RetTime | Area       | Height   | Area    |
|------|---------|------------|----------|---------|
| 1    | 36.036  | 4376.31641 | 65.94884 | 96.9278 |
| 2    | 59.405  | 138.71182  | 1.19413  | 3.0722  |

**(R)-benzyl 2-(2-(5,7-dibromoquinolin-8-yl)-6-methyl-1,1-dioxido-2H-benzo[1,2]thiazin-3-yl)acetate (4zfa).**

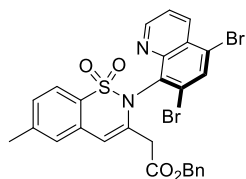

Yield: 39.8 mg (32%). White solid, mp: 184-185 °C.  $^1\text{H NMR}$  (600 MHz,  $\text{CDCl}_3$ )

$\delta$  8.79 (d,  $J = 4.3$ , 1H), 8.45 (dd,  $J = 8.5$ , 1.6 Hz, 1H), 8.01 (s, 1H), 7.68 (d,  $J = 7.9$  Hz, 1H), 7.52 – 7.45 (m, 1H), 7.34 – 7.27 (m, 4H), 7.26 (s, 1H), 7.17 (t,  $J =$

5.9 Hz, 2H), 6.62 (s, 1H), 4.82 (m, 2H), 3.43 – 3.07 (m, 2H), 2.49 (s, 3H).  $^{13}\text{C NMR}$  (151 MHz,  $\text{CDCl}_3$ )

$\delta$  168.2, 152.8, 147.9, 142.3, 135.8, 135.3, 135.1, 133.7, 133.2, 132.9, 130.7, 128.7, 128.6, 128.5,

128.3, 128.2, 127.5, 127.4, 124.4, 123.1, 121.0, 113.4, 66.9, 39.4, 21.7. **HRMS** (ESI):  $m/z$

$[\text{M}+\text{H}]^+$  calcd for  $[\text{C}_{27}\text{H}_{21}\text{Br}_2\text{N}_2\text{O}_4\text{S}]^+$  requires 626.9583, found 626.9597.  $[\alpha]_D^{25} = -54$  ( $c = 0.1$ ,

$\text{CH}_2\text{Cl}_2$ ). The product was analyzed by HPLC to determine the enantiomeric excess: 93% ee

(CHIRALPAK AD-H, hexane/*i*-PrOH = 65/35, detector: 254 nm,  $T = 25$  °C, flow rate: 1 mL/min),  $t_1$

(minor) = 33.8 min,  $t_2$  (major) = 65.9 min.

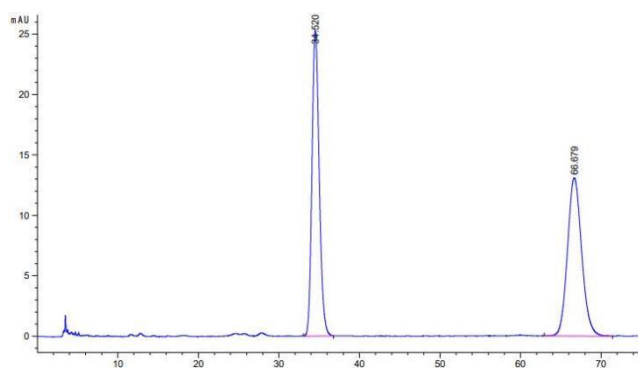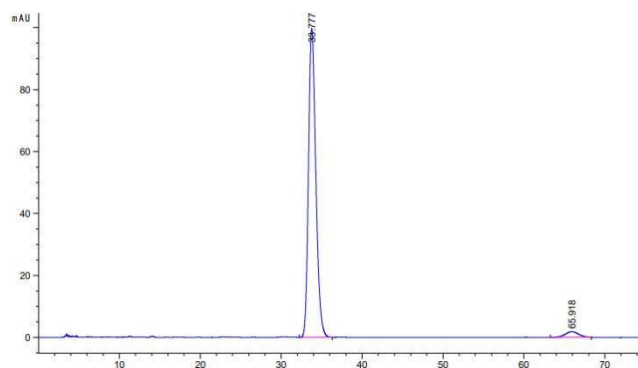

| Peak | RetTime | Area       | Height   | Area    |
|------|---------|------------|----------|---------|
| 1    | 34.520  | 1580.34045 | 25.33051 | 49.6439 |
| 2    | 66.679  | 1603.01001 | 13.09837 | 50.3561 |

| Peak | RetTime | Area       | Height   | Area    |
|------|---------|------------|----------|---------|
| 1    | 33.777  | 6254.67480 | 99.66270 | 96.7056 |
| 2    | 65.918  | 213.07454  | 1.82302  | 3.2944  |

**(R)-methyl 2-(6-methyl-2-(7-methylquinolin-8-yl)-1,1-dioxido-2H-benzo[1,2]thiazin-3-yl)acetate (4ab).**

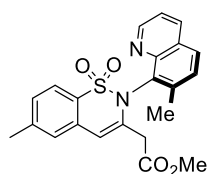

Yield: 70.4 mg (86%). White solid, mp: 219-218 °C.  $^1\text{H NMR}$  (600 MHz,  $\text{CDCl}_3$ )

$\delta$  8.79 (dd,  $J = 4.2$ , 1.7 Hz, 1H), 8.10 (dd,  $J = 8.2$ , 1.7 Hz, 1H), 7.78 (d,  $J = 8.4$  Hz,

1H), 7.71 (d,  $J = 7.9$  Hz, 1H), 7.43 (d,  $J = 8.4$  Hz, 1H), 7.35 – 7.30 (m, 1H), 7.31 –

7.27 (m, 2H), 6.54 (s, 1H), 3.31 (s, 3H), 3.28 – 3.00 (m, 2H), 2.47 (s, 3H), 2.35 (s, 3H).  $^{13}\text{C NMR}$  (151

MHz,  $\text{CDCl}_3$ )  $\delta$  169.2, 151.4, 147.0, 142.5, 142.2, 136.8, 135.7, 133.1, 131.3, 129.9, 129.3, 128.5,

127.4, 127.3, 121.1, 111.8, 51.8, 39.6, 21.7, 18.9. **HRMS** (ESI):  $m/z$   $[\text{M}+\text{H}]^+$  calcd for  $[\text{C}_{22}\text{H}_{21}\text{N}_2\text{O}_4\text{S}]^+$

requires 409.1217, found 409.1210.  $[\alpha]_D^{25} = -213$  ( $c = 0.1$ ,  $\text{CH}_2\text{Cl}_2$ ). The product was analyzed by HPLC to determine the enantiomeric excess: 97% ee (CHIRALPAK AD-H, hexane/*i*-PrOH =65/35, detector: 254 nm,  $T = 25$  °C, flow rate: 1 mL/min),  $t_1$  (major) = 23.0 min,  $t_2$  (minor) = 29.8 min.

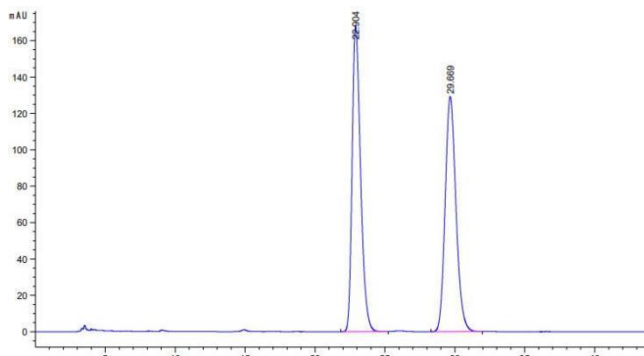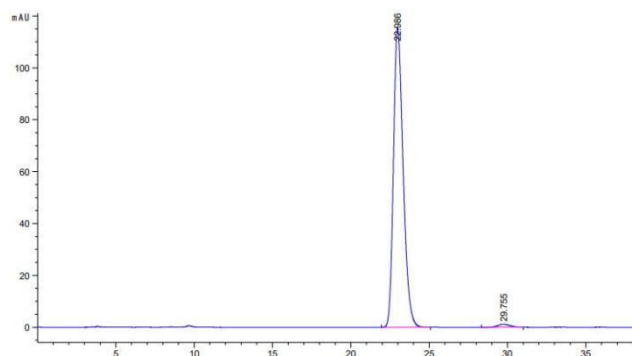

| Peak | RetTime | Area       | Height    | Area    |
|------|---------|------------|-----------|---------|
| 1    | 22.904  | 7063.92676 | 167.86493 | 50.4103 |
| 2    | 29.669  | 6948.93799 | 129.18198 | 49.5897 |

| Peak | RetTime | Area       | Height    | Area    |
|------|---------|------------|-----------|---------|
| 1    | 22.986  | 4959.31836 | 115.37970 | 98.6576 |
| 2    | 29.755  | 67.48198   | 1.18395   | 1.3424  |

**(*R*)-ethyl 2-(6-methyl-2-(7-methylquinolin-8-yl)-1,1-dioxido-2*H*-benzo[1,2]thiazin-3-yl)acetate (4ac).**

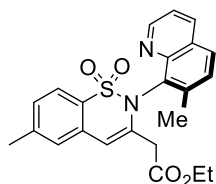

Yield: 72.2 mg (86%). White solid, mp: 143-144 °C.  $^1\text{H NMR}$  (600 MHz,  $\text{CDCl}_3$ )

$\delta$  8.79 (dd,  $J = 4.2, 1.7$  Hz, 1H), 8.08 (dd,  $J = 8.2, 1.7$  Hz, 1H), 7.76 (d,  $J = 8.4$  Hz, 1H), 7.70 (d,  $J = 7.9$  Hz, 1H), 7.41 (d,  $J = 8.4$  Hz, 1H), 7.33 – 7.30 (m, 1H), 7.29 – 7.26 (m, 2H), 6.55 (s, 1H), 3.79 – 3.71 (m, 2H), 3.23 – 3.14 (m, 2H), 2.46 (s, 3H), 2.33 (s, 3H), 0.97 (t,  $J = 7.1$  Hz, 3H).  $^{13}\text{C NMR}$  (151 MHz,  $\text{CDCl}_3$ )  $\delta$  168.8, 151.4, 147.0, 142.6, 142.2, 137.0, 135.7, 133.1, 131.4, 129.9, 129.4, 129.3, 129.2, 128.5, 127.4, 127.3, 121.1, 121.0, 111.8, 60.9, 39.8, 21.7, 18.9, 13.9. **HRMS** (ESI):  $m/z$   $[\text{M}+\text{H}]^+$  calcd for  $[\text{C}_{23}\text{H}_{23}\text{N}_2\text{O}_4\text{S}]^+$  requires 423.1373, found 423.1367.

$[\alpha]_D^{25} = -210$  ( $c = 0.1$ ,  $\text{CH}_2\text{Cl}_2$ ). The product was analyzed by HPLC to determine the enantiomeric excess: 92% ee (CHIRALPAK AD-H, hexane/*i*-PrOH =65/35, detector: 254 nm,  $T = 25$  °C, flow rate: 1 mL/min),  $t_1$  (major) = 23.1 min,  $t_2$  (minor) = 39.8 min.

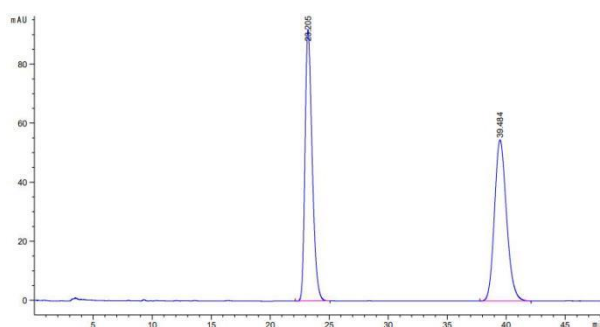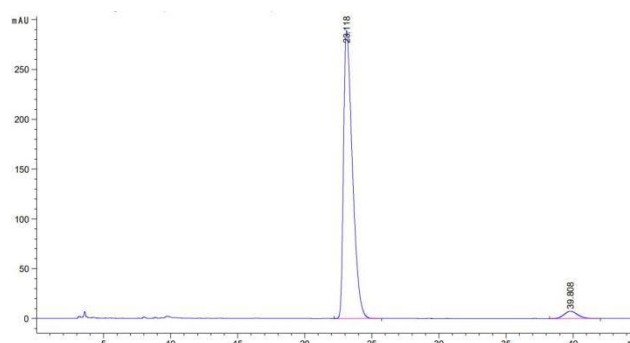

| Peak | RetTime | Area       | Height   | Area    |
|------|---------|------------|----------|---------|
| 1    | 23.205  | 3875.62231 | 91.91750 | 49.9937 |
| 2    | 39.484  | 3876.59839 | 54.52258 | 50.0063 |

| Peak | RetTime | Area      | Height    | Area    |
|------|---------|-----------|-----------|---------|
| 1    | 23.118  | 1.33123e4 | 289.16638 | 96.2196 |
| 2    | 39.808  | 523.02814 | 7.36591   | 3.78047 |

**(R)-isopropyl 2-(6-methyl-2-(7-methylquinolin-8-yl)-1,1-dioxido-2H-benzo[1,2]thiazin-3-yl)acetate (4ad).**

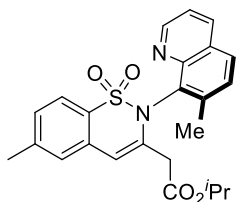

Yield: 81.5 mg (93%). White solid, mp: 158-159 °C. <sup>1</sup>H NMR (600 MHz, CDCl<sub>3</sub>) δ 8.79 (dd, *J* = 4.2, 1.7 Hz, 1H), 8.08 (dd, *J* = 8.2, 1.7 Hz, 1H), 7.76 (d, *J* = 8.4 Hz, 1H), 7.70 (d, *J* = 7.9 Hz, 1H), 7.42 (d, *J* = 8.4 Hz, 1H), 7.34 – 7.30 (m, 1H), 7.29 – 7.24 (m, 2H), 6.55 (s, 1H), 4.70 – 4.62 (m, 1H), 3.28 – 3.03 (m, 2H), 2.46

(s, 3H), 2.34 (s, 3H), 1.03 (d, *J* = 6.3 Hz, 3H), 0.93 (d, *J* = 6.3 Hz, 3H). <sup>13</sup>C NMR (151 MHz, CDCl<sub>3</sub>) δ 168.4, 151.4, 146.9, 142.6, 142.1, 137.0, 135.7, 133.1, 131.4, 129.9, 129.4, 129.2, 128.4, 127.4, 127.2, 121.1, 121.0, 111.7, 68.6, 39.8, 21.7, 21.5, 19.0. HRMS (ESI): *m/z* [M+H]<sup>+</sup> calcd for [C<sub>24</sub>H<sub>25</sub>N<sub>2</sub>O<sub>4</sub>S]<sup>+</sup> requires 437.1530, found 437.1529. [α]<sub>D</sub><sup>25</sup> = -165 (c = 0.1, CH<sub>2</sub>Cl<sub>2</sub>). The product was analyzed by HPLC to determine the enantiomeric excess: 90% ee (CHIRALPAK AD-H, hexane/*i*-PrOH = 60/40, detector: 254 nm, T = 25 °C, flow rate: 1 mL/min), t<sub>1</sub> (minor) = 17.7 min, t<sub>2</sub> (major) = 41.4 min.

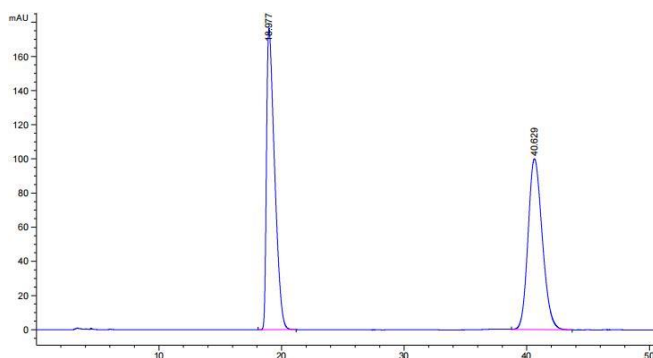

| Peak | RetTime | Area       | Height    | Area    |
|------|---------|------------|-----------|---------|
| 1    | 18.977  | 8092.21191 | 176.70255 | 50.1604 |
| 2    | 40.629  | 8040.44238 | 100.00619 | 49.8396 |

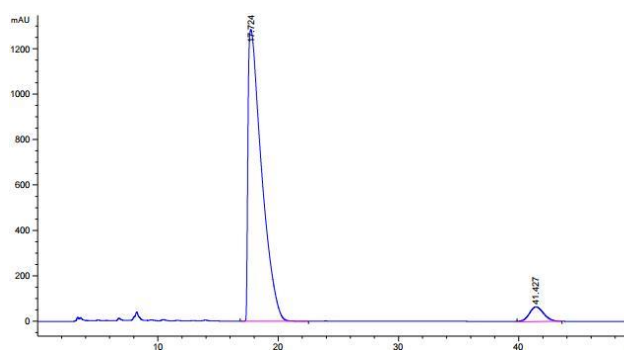

| Peak | RetTime | Area       | Height     | Area    |
|------|---------|------------|------------|---------|
| 1    | 17.724  | 1.00676e5  | 1283.96960 | 94.9448 |
| 2    | 41.427  | 5360.38672 | 64.45087   | 5.0552  |

**(R)-butyl 2-(6-methyl-2-(7-methylquinolin-8-yl)-1,1-dioxido-2H-benzo[1,2]thiazin-3-yl)acetate (4ae).**

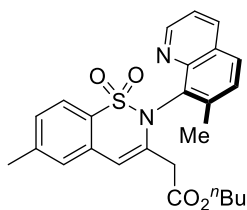

Yield: 77.4 mg (86%). White solid, mp: 130-131 °C.  $^1\text{H NMR}$  (600 MHz,  $\text{CDCl}_3$ )

$\delta$  8.80 (dd,  $J = 4.2, 1.7$  Hz, 1H), 8.09 (dd,  $J = 8.2, 1.7$  Hz, 1H), 7.76 (d,  $J = 8.4$  Hz, 1H), 7.71 (d,  $J = 7.9$  Hz, 1H), 7.42 (d,  $J = 8.4$  Hz, 1H), 7.35 – 7.30 (m, 1H), 7.27 (dd,  $J = 7.8, 1.6$  Hz, 2H), 6.55 (s, 1H), 3.76 – 3.65 (m, 2H), 3.25 – 3.13 (m,

2H), 2.46 (s, 3H), 2.33 (s, 3H), 1.37 – 1.24 (m, 2H), 1.16 – 1.08 (m, 2H), 0.82 (t,  $J = 7.4$  Hz, 3H).  $^{13}\text{C NMR}$  (151 MHz,  $\text{CDCl}_3$ )  $\delta$  168.9, 151.5, 147.0, 142.6, 142.1, 136.9, 135.7, 133.1, 131.4, 129.7, 129.4, 129.3, 128.5, 127.4, 127.2, 121.1, 121.0, 111.7, 64.9, 39.7, 30.3, 21.7, 18.9, 13.6. **HRMS** (ESI):  $m/z$   $[\text{M}+\text{H}]^+$  calcd for  $[\text{C}_{25}\text{H}_{27}\text{N}_2\text{O}_4\text{S}]^+$  requires 451.1686, found 451.1677.  $[\alpha]_{\text{D}}^{25} = -158$  ( $c = 0.1, \text{CH}_2\text{Cl}_2$ ).

The product was analyzed by HPLC to determine the enantiomeric excess: 90% ee (CHIRALPAK AD-H, hexane/*i*-PrOH = 60/40, detector: 254 nm,  $T = 25$  °C, flow rate: 1 mL/min),  $t_1$  (minor) = 17.0 min,  $t_2$  (major) = 29.1 min.

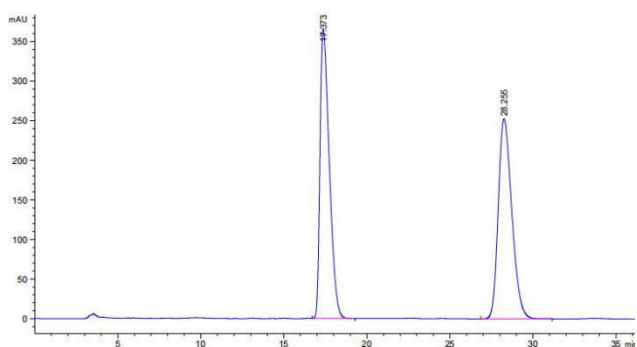

| Peak | RetTime | Area      | Height    | Area    |
|------|---------|-----------|-----------|---------|
| 1    | 17.373  | 1.41956e4 | 365.62860 | 49.7462 |
| 2    | 28.255  | 1.43405e4 | 252.82619 | 50.2538 |

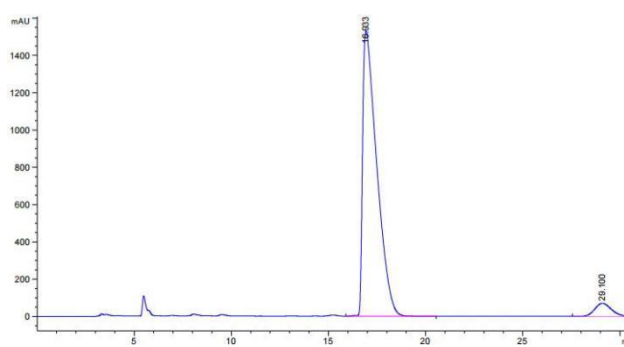

| Peak | RetTime | Area       | Height     | Area    |
|------|---------|------------|------------|---------|
| 1    | 16.933  | 7.73608e4  | 1531.05798 | 94.9123 |
| 2    | 29.100  | 4146.86621 | 70.08300   | 5.0877  |

**(R)-tert-butyl 2-(6-methyl-2-(7-methylquinolin-8-yl)-1,1-dioxido-2H-benzo[1,2]thiazin-3-yl)acetate (4af).**

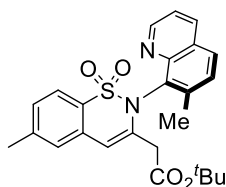

Yield: 47.3 mg (52%). White solid, mp: 154-155 °C.  $^1\text{H NMR}$  (600 MHz,  $\text{CDCl}_3$ )

$\delta$  8.71 (dd,  $J = 4.2, 1.7$  Hz, 1H), 8.02 (dd,  $J = 8.2, 1.7$  Hz, 1H), 7.70 (d,  $J = 8.4$  Hz, 1H), 7.62 (d,  $J = 7.9$  Hz, 1H), 7.36 (d,  $J = 8.4$  Hz, 1H), 7.26 – 7.23 (m, 1H), 7.23 – 7.17 (m, 2H), 6.47 (s, 1H), 3.25 – 2.87 (m, 2H), 2.40 (s, 3H), 2.28 (s, 3H), 1.12

(s, 9H).  $^{13}\text{C NMR}$  (151 MHz,  $\text{CDCl}_3$ )  $\delta$  168.1, 151.4, 147.0, 142.5, 142.1, 137.4, 135.6, 133.2, 131.6, 129.9, 129.5, 129.1, 128.3, 127.5, 127.2, 121.1, 111.6, 81.3, 40.7, 27.7, 21.7, 19.0. **HRMS** (ESI):  $m/z$   $[\text{M}+\text{H}]^+$  calcd for  $[\text{C}_{25}\text{H}_{27}\text{N}_2\text{O}_4\text{S}]^+$  requires 451.1686, found 451.1688.  $[\alpha]_{\text{D}}^{25} = -218$  ( $c = 0.1, \text{CH}_2\text{Cl}_2$ ).

The product was analyzed by HPLC to determine the enantiomeric excess: 91% ee (CHIRALPAK

AD-H, hexane/*i*-PrOH =60/40, detector: 254 nm, T = 25 °C, flow rate: 1 mL/min,  $t_1$  (minor) = 18.7 min,  $t_2$  (major) = 32.7 min.

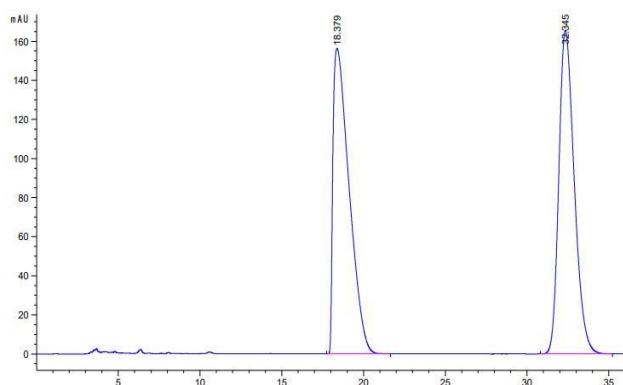

| Peak | RetTime | Area      | Height    | Area    |
|------|---------|-----------|-----------|---------|
| 1    | 18.379  | 1.07485e4 | 156.28583 | 49.7681 |
| 2    | 32.345  | 1.08487e4 | 165.51979 | 50.2319 |

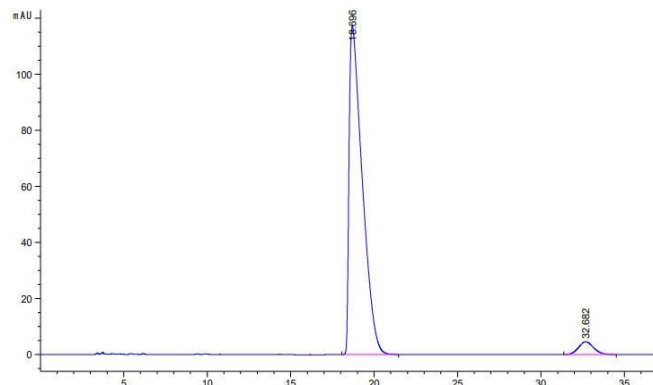

| Peak | RetTime | Area       | Height    | Area    |
|------|---------|------------|-----------|---------|
| 1    | 18.696  | 6400.15625 | 117.02428 | 95.6829 |
| 2    | 32.682  | 288.76904  | 4.56879   | 4.3171  |

**(*R*)-3-benzyl-6-methyl-2-(7-methylquinolin-8-yl)-2*H*-benzo[1,2]thiazine 1,1-dioxide (4ag).**

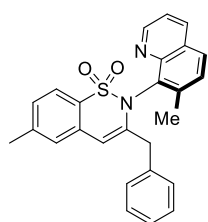

Yield: 51.1 mg (60%). White solid, mp: 206-207 °C. <sup>1</sup>H NMR (600 MHz, CDCl<sub>3</sub>)

δ 8.72 (dd,  $J = 4.2, 1.7$  Hz, 1H), 8.08 (dd,  $J = 8.2, 1.7$  Hz, 1H), 7.73 (d,  $J = 8.4$  Hz, 1H), 7.68 (d,  $J = 7.9$  Hz, 1H), 7.34 (d,  $J = 8.4$  Hz, 1H), 7.32 – 7.28 (m, 1H), 7.23 (d,  $J = 8.0$  Hz, 2H), 7.19 – 7.12 (m, 3H), 6.91 – 6.86 (m, 2H), 6.26 (s, 1H), 3.68 – 3.06

(m, 2H), 2.46 (s, 3H), 2.13 (s, 3H). <sup>13</sup>C NMR (151 MHz, CDCl<sub>3</sub>) δ 151.1, 146.8, 143.7, 142.2, 142.0, 136.6, 135.6, 133.6, 131.7, 129.3, 129.1, 128.8, 128.3, 127.9, 127.3, 126.9, 126.6, 121.1, 121.0, 109.9, 40.3, 21.7, 18.8. HRMS (ESI):  $m/z$  [M+H]<sup>+</sup> calcd for [C<sub>26</sub>H<sub>23</sub>N<sub>2</sub>O<sub>2</sub>S]<sup>+</sup> requires 427.1475, found 427.1482. [α]<sub>D</sub><sup>25</sup> = -185 (c = 0.1, CH<sub>2</sub>Cl<sub>2</sub>). The product was analyzed by HPLC to determine the enantiomeric excess: 93% ee (CHIRALPAK AS-H, hexane/*i*-PrOH =65/35, detector: 254 nm, T = 25 °C, flow rate: 1 mL/min),  $t_1$  (minor) = 11.3 min,  $t_2$  (major) = 14.4 min.

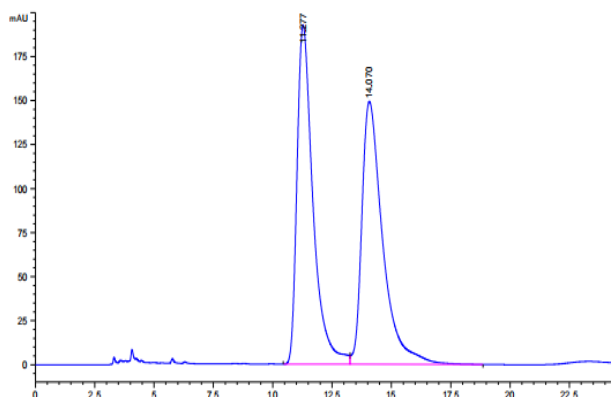

| Peak | RetTime | Area | Height | Area |
|------|---------|------|--------|------|
|------|---------|------|--------|------|

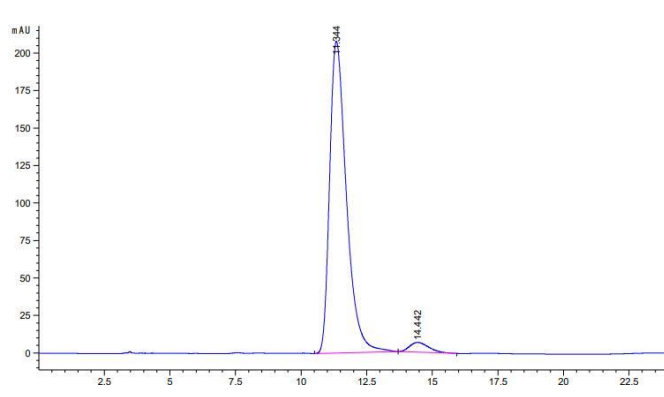

| Peak | RetTime | Area | Height | Area |
|------|---------|------|--------|------|
|------|---------|------|--------|------|

|   |        |            |           |         |
|---|--------|------------|-----------|---------|
| 1 | 11.277 | 9026.43262 | 192.32336 | 49.7502 |
| 2 | 14.070 | 9117.08594 | 149.26382 | 50.2498 |

|   |        |            |           |         |
|---|--------|------------|-----------|---------|
| 1 | 11.344 | 9219.26465 | 207.90971 | 96.5200 |
| 2 | 14.442 | 332.40063  | 6.51449   | 3.4800  |

**(R)-3-(4-fluorobenzyl)-6-methyl-2-(7-methylquinolin-8-yl)-2H-benzo[1,2]thiazine 1,1-dioxide**

**(4ah).**

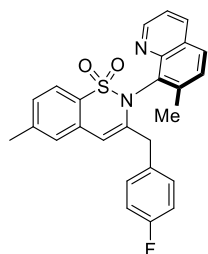

Yield: 49.1mg (55%). White solid, mp: 180-181 °C. <sup>1</sup>H NMR (600 MHz, CDCl<sub>3</sub>) δ 8.69 (dd, *J* = 4.2, 1.7 Hz, 1H), 8.07 (dd, *J* = 8.2, 1.7 Hz, 1H), 7.73 (d, *J* = 8.4 Hz, 1H), 7.66 (d, *J* = 8.4 Hz, 1H), 7.35 (d, *J* = 8.4 Hz, 1H), 7.32 – 7.28 (m, 1H), 7.24 (d, *J* = 1.6 Hz, 2H), 6.87 – 6.81 (m, 4H), 6.27 (s, 1H), 3.48 (d, *J* = 16.3 Hz, 1H), 3.23 (d, *J* = 16.4 Hz, 1H), 2.46 (s, 3H), 2.15 (s, 3H). <sup>13</sup>C NMR (151 MHz, CDCl<sub>3</sub>) δ 161.7

(d, <sup>1</sup>*J*<sub>C-F</sub> = 245.1 Hz), 151.1, 146.7, 143.4, 142.0, 135.6, 133.5, 132.4 (d, <sup>3</sup>*J*<sub>C-F</sub> = 3.6 Hz), 131.7, 130.5, 130.4, 129.3, 129.2, 128.8, 128.0, 127.3, 126.9, 121.2, 121.0, 115.1, 115.0, 110.1, 39.5, 21.7, 18.8. <sup>19</sup>F NMR (565 MHz, CDCl<sub>3</sub>) δ -116.3. HRMS (ESI): *m/z* [M+H]<sup>+</sup> calcd for [C<sub>26</sub>H<sub>22</sub>FN<sub>2</sub>O<sub>2</sub>S]<sup>+</sup> requires 445.1381, found 4445.1391. [α]<sub>D</sub><sup>25</sup> = -94 (c = 0.1, CH<sub>2</sub>Cl<sub>2</sub>). The product was analyzed by HPLC to determine the enantiomeric excess: 92% ee (CHIRALPAK AS-H, hexane/*i*-PrOH = 65/35, detector: 254 nm, T = 25 °C, flow rate: 1 mL/min), *t*<sub>1</sub> (minor) = 16.0 min, *t*<sub>2</sub> (major) = 30.1 min.

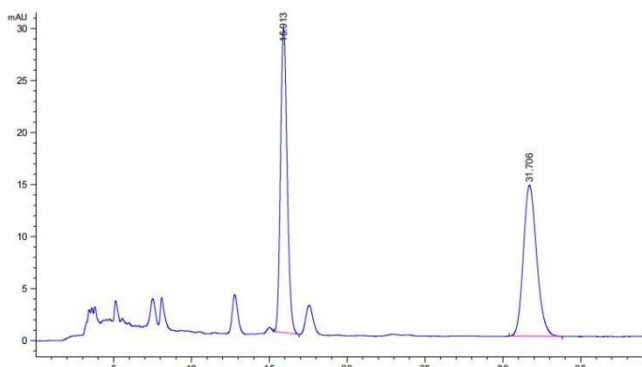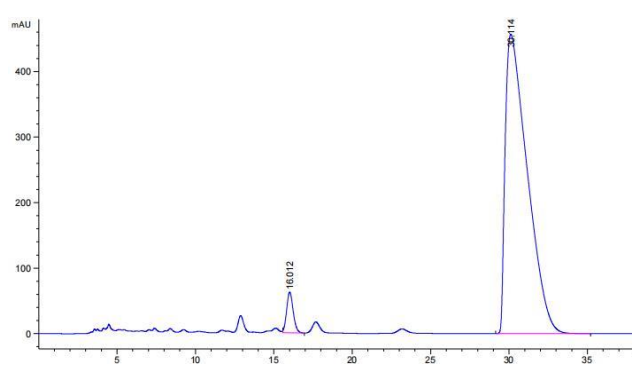

| Peak | RetTime | Area      | Height   | Area    |
|------|---------|-----------|----------|---------|
| 1    | 15.913  | 869.82690 | 29.31031 | 50.1865 |
| 2    | 31.706  | 863.36353 | 14.52713 | 49.8135 |

| Peak | RetTime | Area       | Height    | Area    |
|------|---------|------------|-----------|---------|
| 1    | 16.012  | 1812.79358 | 62.30758  | 3.9055  |
| 2    | 30.114  | 4.46034e4  | 456.90622 | 96.0945 |

**(R)-3-(4-chlorobenzyl)-6-methyl-2-(7-methylquinolin-8-yl)-2H-benzo[1,2]thiazine 1,1-dioxide**

**(4ai).**

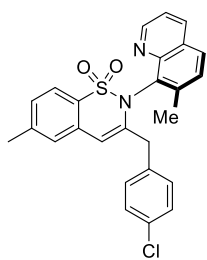

Yield: 66.3mg (72%). White solid, mp: 142-143 °C.  $^1\text{H NMR}$  (600 MHz,  $\text{CDCl}_3$ )  $\delta$  8.66 (dd,  $J = 4.3, 1.8$  Hz, 1H), 8.05 (dd,  $J = 8.2, 1.7$  Hz, 1H), 7.72 (d,  $J = 8.4$  Hz, 1H), 7.67 (d,  $J = 8.2$  Hz, 1H), 7.34 (d,  $J = 8.4$  Hz, 1H), 7.30 – 7.26 (m, 1H), 7.24 (d,  $J = 6.0$  Hz, 2H), 7.14 – 7.07 (m, 2H), 6.80 (d,  $J = 8.0$  Hz, 2H), 6.28 (s, 1H), 3.47 (d,  $J = 16.3$  Hz, 1H), 3.24 (d,  $J = 16.3$  Hz, 1H), 2.46 (s, 3H), 2.17 (s, 3H).  $^{13}\text{C NMR}$  (151 MHz,  $\text{CDCl}_3$ )  $\delta$  151.1, 146.7, 143.1, 142.1, 142.0, 135.6, 135.2, 133.5, 132.4, 131.7, 130.4, 129.4, 129.2, 128.9, 128.3, 128.1, 127.3, 127.0, 121.1, 121.0, 110.2, 39.7, 21.7, 18.8. **HRMS** (ESI):  $m/z$   $[\text{M}+\text{H}]^+$  calcd for  $[\text{C}_{26}\text{H}_{22}\text{ClN}_2\text{O}_2\text{S}]^+$  requires 461.1085, found 461.1092.  $[\alpha]_{\text{D}}^{25} = -36$  ( $c = 0.1, \text{CH}_2\text{Cl}_2$ ). The product was analyzed by HPLC to determine the enantiomeric excess: 91% ee (CHIRALPAK AD-H, hexane/*i*-PrOH = 60/40, detector: 254 nm,  $T = 25$  °C, flow rate: 1 mL/min),  $t_1$  (minor) = 16.0 min,  $t_2$  (major) = 41.4 min.

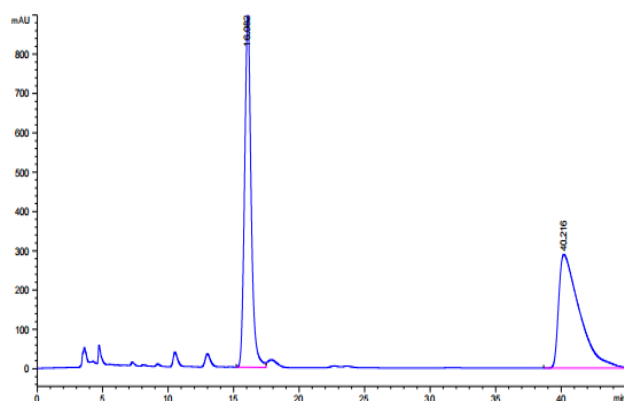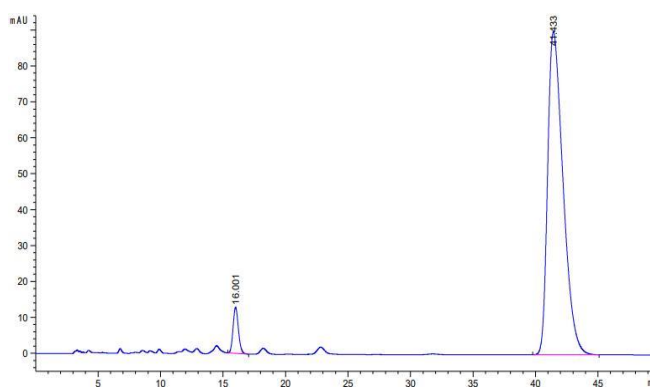

| Peak | RetTime | Area      | Height    | Area    |
|------|---------|-----------|-----------|---------|
| 1    | 16.082  | 3.20888e4 | 899.24500 | 50.1895 |
| 2    | 40.216  | 3.18465e4 | 289.37302 | 49.8105 |

| Peak | RetTime | Area       | Height   | Area    |
|------|---------|------------|----------|---------|
| 1    | 16.001  | 377.30667  | 12.79375 | 4.6833  |
| 2    | 41.433  | 7679.11133 | 89.94887 | 95.3167 |

**(R)-6-methyl-2-(7-methylquinolin-8-yl)-3-(4-(trifluoromethyl)benzyl)-2H-benzo[1,2]thiazine 1,1-dioxide (4aj).**

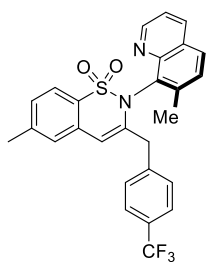

Yield: 61.0mg (62%). White solid, mp: 168-169 °C.  $^1\text{H NMR}$  (600 MHz,  $\text{CDCl}_3$ )  $\delta$  8.61 (dd,  $J = 4.2, 1.7$  Hz, 1H), 8.02 (dd,  $J = 8.2, 1.7$  Hz, 1H), 7.68 (dd,  $J = 11.5, 8.1$  Hz, 2H), 7.33 (dd,  $J = 15.6, 8.2$  Hz, 3H), 7.28 – 7.22 (m, 3H), 6.95 (d,  $J = 8.0$  Hz, 2H), 6.33 (s, 1H), 3.54 (d,  $J = 16.2$  Hz, 1H), 3.37 (d,  $J = 16.2$  Hz, 1H), 2.46 (s, 3H), 2.16 (s, 3H).  $^{13}\text{C NMR}$  (151 MHz,  $\text{CDCl}_3$ )  $\delta$  151.1, 146.6, 142.4, 142.1, 142.0, 140.8, 135.5, 133.4, 131.6, 129.1, 129.0 (q,  $^2J_{\text{C-F}} = 35.6$  Hz), 128.5, 128.2, 127.3, 127.0, 125.0 (q,  $^3J_{\text{C-F}} = 4.4$  Hz), 124.2 (q,  $^1J_{\text{C-F}} = 271.9$  Hz), 121.2, 121.0, 110.7, 40.3, 21.7, 18.8.  $^{19}\text{F NMR}$  (565 MHz,



CDCl<sub>3</sub>)  $\delta$  -62.4. **HRMS** (ESI):  $m/z$  [M+H]<sup>+</sup>calcd for [C<sub>27</sub>H<sub>22</sub>F<sub>3</sub>N<sub>2</sub>O<sub>2</sub>S]<sup>+</sup> requires 495.1349, found 495.1353.  $[\alpha]_D^{25} = -104$  (c = 0.1, CH<sub>2</sub>Cl<sub>2</sub>). The product was analyzed by HPLC to determine the enantiomeric excess: 92% ee (CHIRALPAK AD-H, hexane/*i*-PrOH =60/40, detector: 254 nm, T = 25 °C, flow rate: 1 mL/min),  $t_1$  (minor) = 11.6 min,  $t_2$  (major) = 36.1 min.

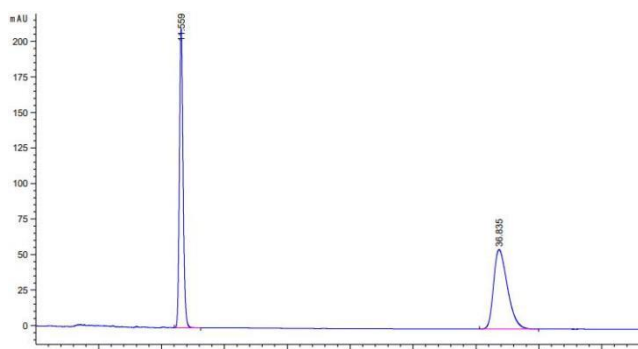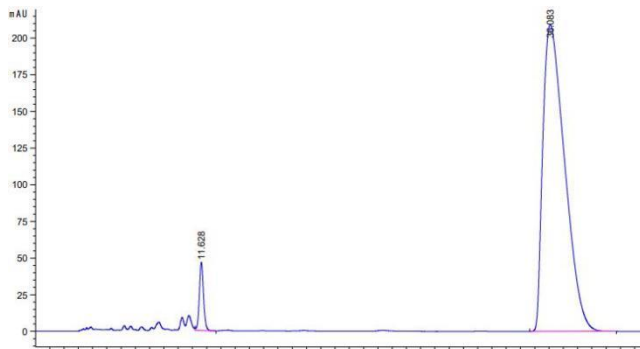

| Peak | RetTime | Area       | Height    | Area    |
|------|---------|------------|-----------|---------|
| 1    | 11.559  | 4244.96436 | 210.65674 | 49.8010 |
| 2    | 36.835  | 4278.89453 | 56.02214  | 50.1990 |

| Peak | RetTime | Area      | Height    | Area    |
|------|---------|-----------|-----------|---------|
| 1    | 11.628  | 944.88794 | 46.61975  | 4.0753  |
| 2    | 36.083  | 2.22408e4 | 209.39919 | 95.9247 |

**(R)-3-(4-methoxybenzyl)-6-methyl-2-(7-methylquinolin-8-yl)-2H-benzo[1,2]thiazine 1,1-dioxide (4ak).**

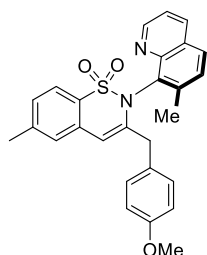

Yield: 56.6mg (62%). White solid, mp: 134-135 °C. **<sup>1</sup>H NMR** (600 MHz, CDCl<sub>3</sub>)  $\delta$  8.71 (dd,  $J = 4.2, 1.7$  Hz, 1H), 8.07 (dd,  $J = 8.2, 1.7$  Hz, 1H), 7.73 (d,  $J = 8.4$  Hz, 1H), 7.68 (d,  $J = 7.8$  Hz, 1H), 7.36 (d,  $J = 8.4$  Hz, 1H), 7.31 – 7.27 (m, 1H), 7.22 (d,  $J = 7.7$  Hz, 2H), 6.84 – 6.79 (m, 2H), 6.75 – 6.69 (m, 2H), 6.24 (s, 1H), 3.76 (s, 3H), 3.47 (d,  $J = 16.5$  Hz, 1H), 3.18 (d,  $J = 16.5$  Hz, 1H), 2.44 (s, 3H), 2.17 (s, 3H). **<sup>13</sup>C NMR** (151 MHz, CDCl<sub>3</sub>)  $\delta$  158.4, 151.1, 146.8, 144.1, 142.1, 142.0, 135.6, 133.7, 131.8, 130.2, 129.3, 128.8, 128.6, 127.8, 127.3, 126.9, 121.1, 121.0, 113.7, 109.6, 55.3, 39.4, 21.7, 18.8. **HRMS** (ESI):  $m/z$  [M+H]<sup>+</sup>calcd for [C<sub>27</sub>H<sub>25</sub>N<sub>2</sub>O<sub>3</sub>S]<sup>+</sup> requires 457.1580, found 457.1587.  $[\alpha]_D^{25} = -190$  (c = 0.1, CH<sub>2</sub>Cl<sub>2</sub>). The product was analyzed by HPLC to determine the enantiomeric excess: 90% ee (CHIRALPAK AS-H, hexane/*i*-PrOH =65/35, detector: 254 nm, T = 25 °C, flow rate: 1 mL/min),  $t_1$  (minor) = 14.4 min,  $t_2$  (major) = 18.4 min.

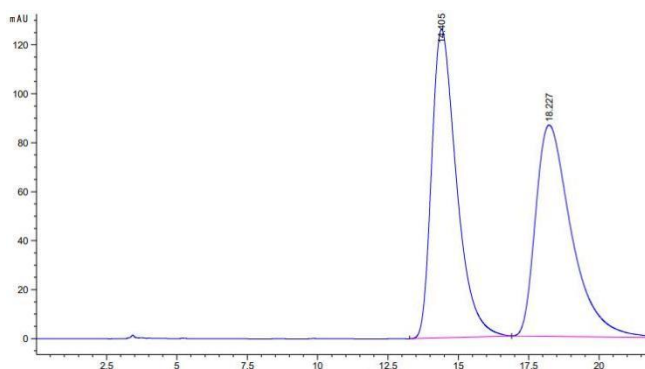

| Peak | RetTime | Area       | Height    | Area    |
|------|---------|------------|-----------|---------|
| 1    | 14.405  | 7722.64941 | 126.11690 | 50.3249 |
| 2    | 18.227  | 7622.93652 | 86.34531  | 49.6751 |

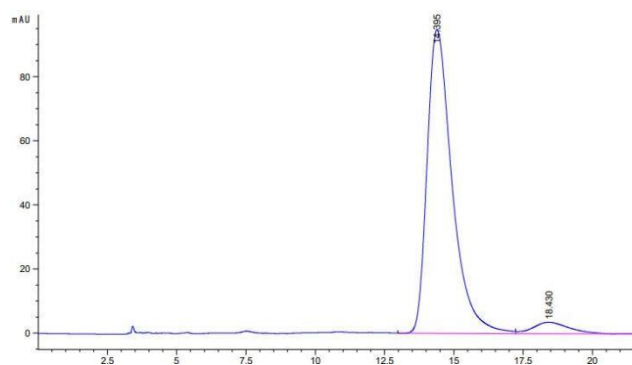

| Peak | RetTime | Area       | Height   | Area    |
|------|---------|------------|----------|---------|
| 1    | 14.395  | 5940.56592 | 94.72958 | 94.8790 |
| 2    | 18.430  | 320.63315  | 3.55101  | 5.1210  |

**(R)-6-methyl-2-(7-methylquinolin-8-yl)-3-phenethyl-2H-benzo[1,2]thiazine 1,1-dioxide (4a).**

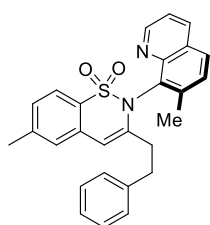

Yield: 56.5mg (64%). Yellow solid, mp: 180-181 °C. <sup>1</sup>H NMR (600 MHz, CDCl<sub>3</sub>)

δ 8.82 (dd, *J* = 4.2, 1.7 Hz, 1H), 8.11 (dd, *J* = 8.3, 1.7 Hz, 1H), 7.77 (d, *J* = 8.4 Hz, 1H), 7.70 (d, *J* = 8.3 Hz, 1H), 7.44 (d, *J* = 8.4 Hz, 1H), 7.35 – 7.30 (m, 1H), 7.25 – 7.22 (m, 2H), 7.16 (dd, *J* = 8.2, 6.6 Hz, 2H), 7.13 – 7.08 (m, 1H), 6.92 – 6.88 (m, 2H), 6.39 (s, 1H), 2.89 – 2.78 (m, 2H), 2.47 (s, 3H), 2.36 – 2.31 (m, 5H). <sup>13</sup>C NMR (151 MHz, CDCl<sub>3</sub>)

δ 151.3, 147.0, 143.8, 142.0, 141.1, 140.8, 135.6, 133.5, 132.2, 129.7, 129.4, 128.8, 127.9, 127.5, 126.9, 126.0, 121.1, 108.9, 35.8, 34.1, 21.7, 18.9. HRMS (ESI): *m/z* [M+H]<sup>+</sup> calcd for [C<sub>27</sub>H<sub>25</sub>N<sub>2</sub>O<sub>2</sub>S]<sup>+</sup> requires 441.1631, found 441.1632. [α]<sub>D</sub><sup>25</sup> = -405 (c = 0.1, CH<sub>2</sub>Cl<sub>2</sub>). The product was analyzed by HPLC to determine the enantiomeric excess: 84% ee (CHIRALPAK AS-H, hexane/*i*-PrOH = 65/35, detector: 254 nm, T = 25 °C, flow rate: 1 mL/min), *t*<sub>1</sub> (minor) = 12.5 min, *t*<sub>2</sub> (major) = 22.9 min.

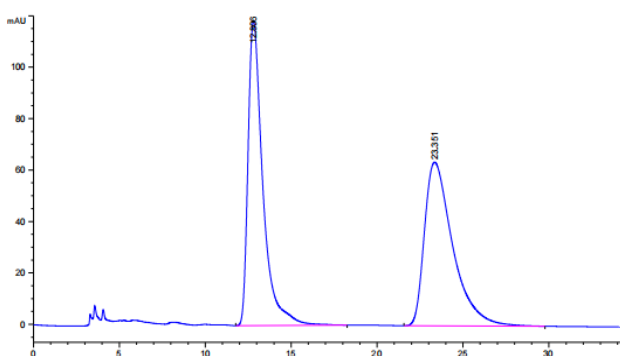

| Peak | RetTime | Area       | Height    | Area    |
|------|---------|------------|-----------|---------|
| 1    | 12.806  | 7108.19141 | 118.51214 | 49.3749 |
| 2    | 23.351  | 7288.18164 | 63.65857  | 50.6251 |

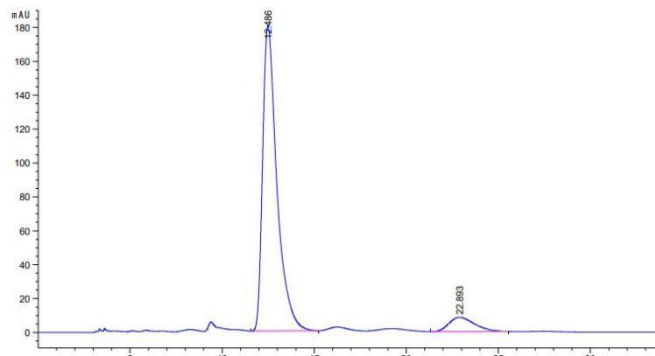

| Peak | RetTime | Area       | Height    | Area    |
|------|---------|------------|-----------|---------|
| 1    | 12.486  | 9692.85840 | 180.34088 | 92.2104 |
| 2    | 22.893  | 818.81738  | 8.43655   | 7.7896  |

**(R)-3-((diphenylphosphoryl)methyl)-6-methyl-2-(7-methylquinolin-8-yl)-2H-benzo[1,2]thiazine 1,1-dioxide (4am).**

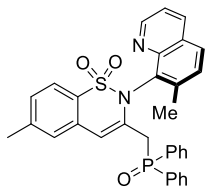

Yield: 55.0 mg (50%). Yellow solid, mp: 208-209 °C. <sup>1</sup>H NMR (600 MHz, CDCl<sub>3</sub>)

δ 8.80 (dd, *J* = 4.1, 1.7 Hz, 1H), 8.06 (dd, *J* = 8.3, 1.8 Hz, 1H), 7.86 (dd, *J* = 11.7, 7.2 Hz, 2H), 7.71 (d, *J* = 8.4 Hz, 1H), 7.63 (d, *J* = 7.9 Hz, 1H), 7.51 – 7.42 (m, 6H), 7.37 – 7.28 (m, 4H), 7.20 (d, *J* = 9.0 Hz, 2H), 7.07 (d, *J* = 2.5 Hz, 1H), 3.24 (dd, *J* =

16.5, 13.1 Hz, 1H), 2.99 (t, *J* = 15.9 Hz, 1H), 2.40 (s, 3H), 2.09 (s, 3H). <sup>13</sup>C NMR (151 MHz, CDCl<sub>3</sub>) δ 151.4, 147.1, 142.2(d, <sup>3</sup>*J*<sub>C-F</sub> = 4.3 Hz), 135.8, 134.7(d, <sup>3</sup>*J*<sub>C-F</sub> = 4.3 Hz), 133.0, 132.8(d, <sup>1</sup>*J*<sub>C-F</sub> = 101.5 Hz), 132.1(d, <sup>3</sup>*J*<sub>C-F</sub> = 2.3 Hz), 131.8(d, <sup>3</sup>*J*<sub>C-F</sub> = 2.3 Hz), 131.6(d, <sup>1</sup>*J*<sub>C-F</sub> = 102.6 Hz), 131.5, 131.4, 131.3, 130.7(d, <sup>2</sup>*J*<sub>C-F</sub> = 9.9 Hz), 130.1, 129.6, 129.2, 128.8(d, <sup>2</sup>*J*<sub>C-F</sub> = 12.1 Hz), 128.5(d, <sup>2</sup>*J*<sub>C-F</sub> = 12.1 Hz), 128.4, 127.6, 127.4, 121.2, 120.8, 113.2(d, <sup>3</sup>*J*<sub>C-F</sub> = 5.5 Hz), 33.6(d, <sup>1</sup>*J*<sub>C-F</sub> = 66.1 Hz), 21.7, 18.6. <sup>31</sup>P NMR (565 MHz, CDCl<sub>3</sub>) δ 29.9. HRMS (ESI): *m/z* [M+H]<sup>+</sup> calcd for [C<sub>32</sub>H<sub>28</sub>N<sub>2</sub>O<sub>3</sub>PS]<sup>+</sup> requires 551.1553, found 551.1560. [α]<sub>D</sub><sup>25</sup> = -157 (c = 0.1, CH<sub>2</sub>Cl<sub>2</sub>). The product was analyzed by HPLC to determine the enantiomeric excess: 77% ee (CHIRALPAK AS-H, hexane/*i*-PrOH = 65/35, detector: 254 nm, T = 25 °C, flow rate: 1 mL/min), *t*<sub>1</sub> (minor) = 30.7 min, *t*<sub>2</sub> (major) = 36.4 min.

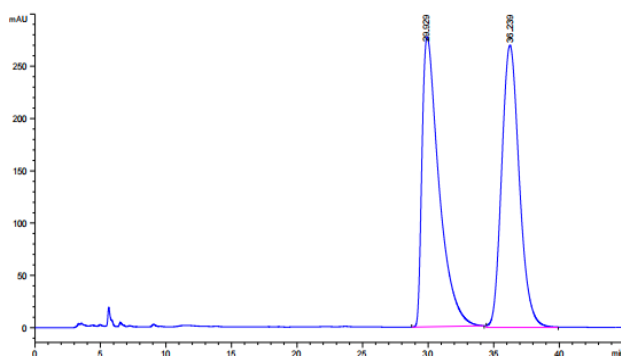

| Peak | RetTime | Area      | Height    | Area    |
|------|---------|-----------|-----------|---------|
| 1    | 29.929  | 2.49163e4 | 277.48050 | 49.7168 |
| 2    | 36.239  | 2.52002e4 | 269.91238 | 50.2832 |

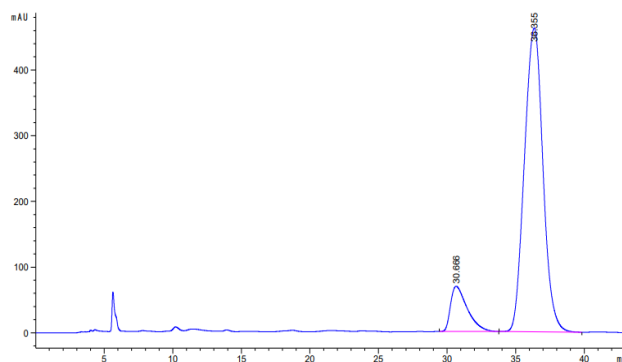

| Peak | RetTime | Area       | Height    | Area    |
|------|---------|------------|-----------|---------|
| 1    | 30.666  | 5812.68701 | 68.89148  | 11.8011 |
| 2    | 36.355  | 4.34428e4  | 462.57236 | 88.1989 |

**(R)-benzyl 2-(4,6-dimethyl-2-(7-methylquinolin-8-yl)-1,1-dioxido-2H-benzo [1,2]thiazin-3-yl)acetate (4an).**

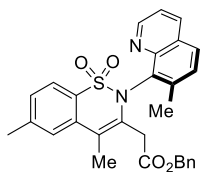

Yield: 34.9mg (35%). White solid, mp: 179-180 °C. <sup>1</sup>H NMR (600 MHz, CDCl<sub>3</sub>) δ

8.83 (dd, *J* = 4.2, 1.7 Hz, 1H), 8.06 (dd, *J* = 8.2, 1.7 Hz, 1H), 7.71 (dd, *J* = 8.4 Hz, 1.9 Hz, 2H), 7.48 (s, 1H), 7.34 – 7.23 (m, 6H), 7.05 (dd, *J* = 7.2, 2.4 Hz, 2H), 4.75 – 4.68

(m, 2H), 3.56 (d,  $J = 16.9$  Hz, 1H), 3.26 (d,  $J = 16.9$  Hz, 1H), 2.51 (s, 3H), 2.30 (s, 3H), 2.06 (s, 3H).  $^{13}\text{C}$  NMR (151 MHz,  $\text{CDCl}_3$ )  $\delta$  168.7, 151.6, 147.2, 142.5, 141.9, 135.7, 135.3, 135.0, 131.9, 131.6, 129.5, 129.1, 128.4, 128.3, 128.2, 128.1, 127.4, 125.4, 121.1, 121.0, 118.2, 66.5, 37.0, 22.0, 18.6, 15.3. HRMS (ESI):  $m/z$   $[\text{M}+\text{H}]^+$  calcd for  $[\text{C}_{29}\text{H}_{27}\text{N}_2\text{O}_4\text{S}]^+$  requires 499.1686, found 499.1693.  $[\alpha]_D^{25} = -158$  ( $c = 0.1$ ,  $\text{CH}_2\text{Cl}_2$ ). The product was analyzed by HPLC to determine the enantiomeric excess: 91% ee (CHIRALPAK AD-H, hexane/*i*-PrOH = 65/35, detector: 254 nm,  $T = 25$  °C, flow rate: 1 mL/min),  $t_1$  (minor) = 13.1 min,  $t_2$  (major) = 28.8 min.

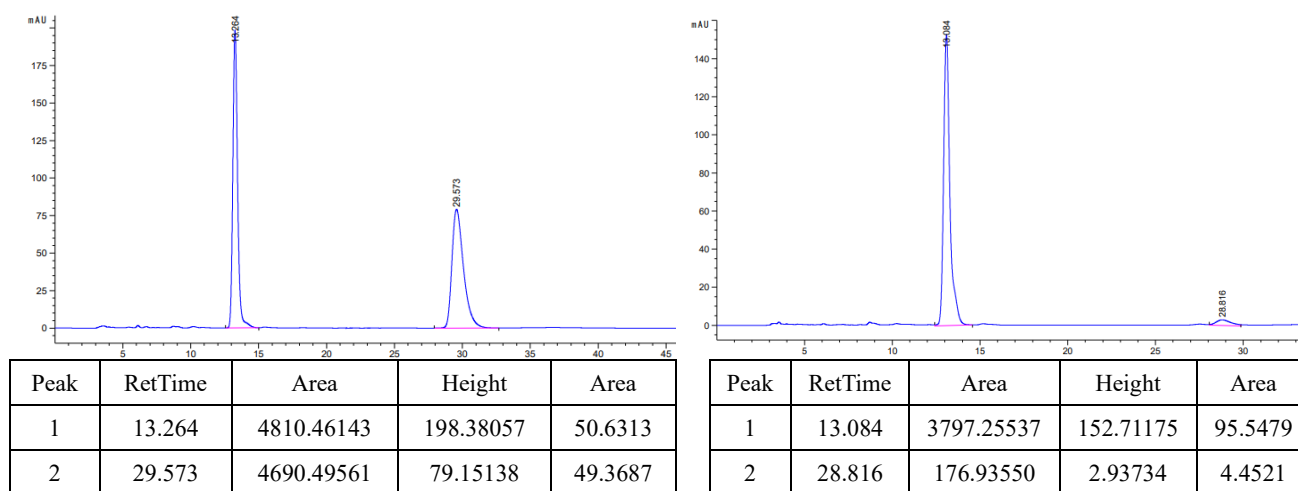

**(*R*)-6-methyl-2-(7-methylquinolin-8-yl)-3,4-diphenyl-2*H*-benzo[1,2]thiazine-1,1-dioxide (5aa).**

Yield: 88.9 mg (91%). White solid, mp: 200-201 °C.  $^1\text{H}$  NMR (600 MHz,  $\text{CDCl}_3$ )  $\delta$  8.80 (dd,  $J = 4.2, 1.7$  Hz, 1H), 7.96 (dd,  $J = 8.2, 1.7$  Hz, 1H), 7.79 (d,  $J = 7.9$  Hz, 1H), 7.53 (d,  $J = 8.4$  Hz, 1H), 7.33 - 7.26 (m, 4H), 7.23 (t,  $J = 7.3$  Hz, 2H), 7.21 - 7.15 (m, 3H), 7.06 (d,  $J = 7.0$  Hz, 2H), 6.81 (t,  $J = 7.4$  Hz, 1H), 6.74 (t,  $J = 7.5$  Hz, 2H), 2.40 (s, 3H), 2.39 (s, 3H).  $^{13}\text{C}$  NMR (151 MHz,  $\text{CDCl}_3$ )  $\delta$  150.5, 146.6, 141.7, 141.0, 140.5, 136.7, 135.3, 134.9, 133.1, 131.8, 130.5, 129.2, 128.4, 128.2, 127.8, 127.7, 127.2, 127.0, 126.9, 126.7, 124.1, 121.3, 120.7, 22.0, 19.2. HRMS (ESI):  $m/z$   $[\text{M}+\text{H}]^+$  calcd for  $[\text{C}_{31}\text{H}_{24}\text{N}_2\text{O}_2\text{S}]^+$  requires 489.1631, found 489.1635.  $[\alpha]_D^{25} = -135$  ( $c = 0.1$ ,  $\text{CH}_2\text{Cl}_2$ ). The product was analyzed by HPLC to determine the enantiomeric excess: 98% ee (CHIRALPAK AS-H, hexane/*i*-PrOH = 95/5, detector: 254 nm,  $T = 25$  °C, flow rate: 1 mL/min),  $t_1$  (minor) = 18.68 min,  $t_2$  (major) = 25.98 min.

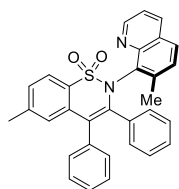

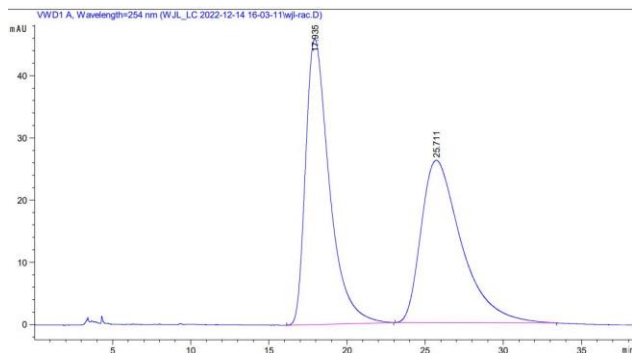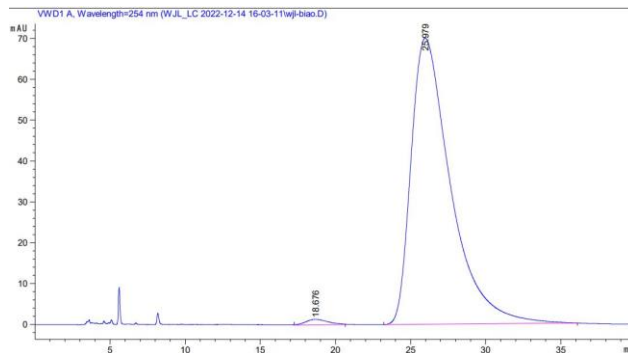

| Peak | RetTime | Area       | Height   | Area    |
|------|---------|------------|----------|---------|
| 1    | 17.935  | 4862.44775 | 45.93650 | 50.9440 |
| 2    | 25.711  | 4682.23682 | 26.10755 | 49.0560 |

| Peak | RetTime | Area                  | Height   | Area    |
|------|---------|-----------------------|----------|---------|
| 1    | 18.676  | 141.52917             | 1.36001  | 1.0919  |
| 2    | 25.979  | 1.28200e <sup>4</sup> | 70.06489 | 98.9081 |

**(R)-6-fluoro-2-(7-methylquinolin-8-yl)-3,4-diphenyl-2H-benzo[1,2]thiazine-1,1-dioxide (5ba).**

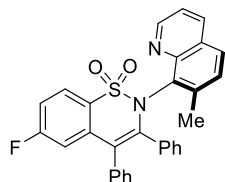

Yield: 76.8 mg (78%). White solid, mp: 186-187 °C. <sup>1</sup>H NMR (600 MHz, CDCl<sub>3</sub>)

δ 8.73 (dd, *J* = 4.2, 1.7 Hz, 1H), 7.97 (dd, *J* = 8.2, 1.7 Hz, 1H), 7.88 (dd, *J* = 8.6,

5.4 Hz, 1H), 7.54 (d, *J* = 8.4 Hz, 1H), 7.32 – 7.15 (m, 8H), 7.07 (dd, *J* = 10.6, 2.5

Hz, 1H), 7.01 (d, *J* = 7.0 Hz, 2H), 6.84 (t, *J* = 7.4 Hz, 1H), 6.76 (t, *J* = 7.6 Hz, 2H), 2.45 (s, 3H). <sup>13</sup>C

NMR (151 MHz, CDCl<sub>3</sub>) δ 164.3 (d, <sup>1</sup>*J*<sub>C-F</sub> = 250.8 Hz), 150.5, 146.5, 142.5, 140.8, 138.0 (d, <sup>3</sup>*J*<sub>C-F</sub> =

9.0 Hz), 136.0, 135.4, 134.7, 132.8, 131.6, 129.6, 129.2, 129.0, 128.4, 128.1, 128.0, 127.3, 127.0,

126.8, 124.1 (d, <sup>3</sup>*J*<sub>C-F</sub> = 8.6 Hz), 123.6 (d, <sup>4</sup>*J*<sub>C-F</sub> = 2.6 Hz), 114.9 (d, <sup>2</sup>*J*<sub>C-F</sub> = 24.2 Hz), 113.5 (d, <sup>2</sup>*J*<sub>C-F</sub> =

24.2 Hz), 19.3. <sup>19</sup>F NMR (565 MHz, CDCl<sub>3</sub>) δ -106.7. HRMS (ESI): *m/z* [M+H]<sup>+</sup> calcd for

[C<sub>30</sub>H<sub>21</sub>FN<sub>2</sub>O<sub>2</sub>S]<sup>+</sup> requires 493.1381, found 493.1384. [α]<sub>D</sub><sup>25</sup> = +16 (c = 0.1, CH<sub>2</sub>Cl<sub>2</sub>). The product

was analyzed by HPLC to determine the enantiomeric excess: 99% ee (CHIRALPAK OD-H, hexane/*i*-

PrOH = 90/10, detector: 254 nm, T = 25 °C, flow rate: 1 mL/min), *t*<sub>1</sub> (minor) = 10.20 min, *t*<sub>2</sub> (major)

= 14.08 min.

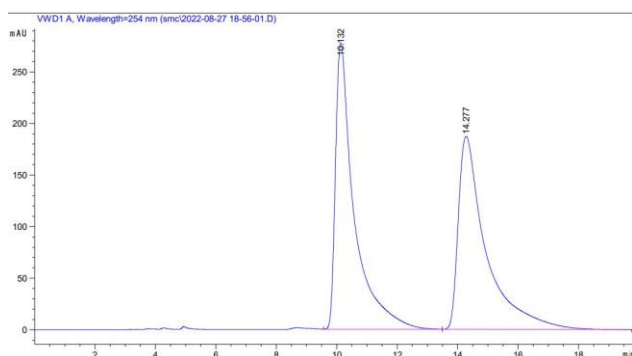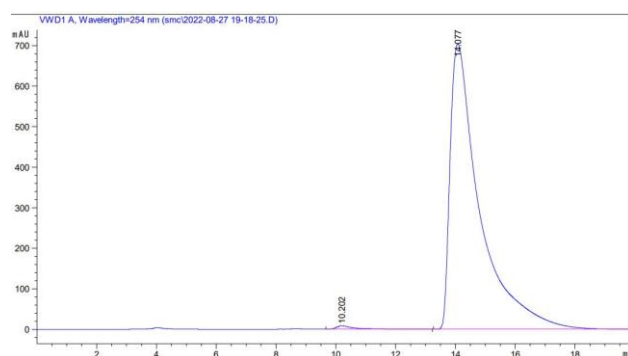

| Peak | RetTime | Area                  | Height    | Area    |
|------|---------|-----------------------|-----------|---------|
| 1    | 10.132  | 1.19288e <sup>4</sup> | 277.64850 | 50.0778 |

| Peak | RetTime | Area      | Height  | Area   |
|------|---------|-----------|---------|--------|
| 1    | 10.202  | 355.11111 | 8.27984 | 0.7295 |

|   |        |                       |           |         |   |        |                       |           |         |
|---|--------|-----------------------|-----------|---------|---|--------|-----------------------|-----------|---------|
| 2 | 14.277 | 1.18918e <sup>4</sup> | 187.14862 | 49.9222 | 2 | 14.077 | 4.83243e <sup>4</sup> | 704.15118 | 99.2705 |
|---|--------|-----------------------|-----------|---------|---|--------|-----------------------|-----------|---------|

**(R)-6-chloro-2-(7-methylquinolin-8-yl)-3,4-diphenyl-2H-benzo[1,2]thiazine-1,1-dioxide (5ca).**

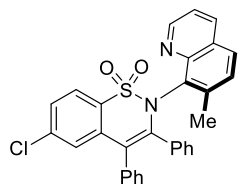

Yield: 58.3 mg (57%). White solid, mp: 182-183 °C. <sup>1</sup>H NMR (600 MHz, CDCl<sub>3</sub>)

δ 8.71 (d, *J* = 4.2 Hz, 1H), 7.95 (d, *J* = 8.6 Hz, 1H), 7.80 (d, *J* = 8.3 Hz, 1H), 7.52 (d, *J* = 8.4 Hz, 1H), 7.42 (d, *J* = 8.4 Hz, 1H), 7.35 (s, 1H), 7.30 – 7.24 (m, 3H),

7.22 (t, *J* = 7.5 Hz, 2H), 7.20 – 7.14 (m, 2H), 6.99 (d, *J* = 7.6 Hz, 2H), 6.82 (t, *J* = 7.4 Hz, 1H), 6.75

(t, *J* = 7.5 Hz, 2H), 2.44 (s, 3H). <sup>13</sup>C NMR (151 MHz, CDCl<sub>3</sub>) δ 150.5, 146.4, 142.6, 140.7, 137.7,

136.9, 135.8, 135.4, 134.6, 132.7, 131.6, 131.0, 129.6, 129.1, 128.4, 128.1, 128.0, 127.6, 127.4, 127.0,

126.8, 126.7, 123.5, 123.0, 120.9, 19.3. HRMS (ESI): *m/z* [M+H]<sup>+</sup> calcd for [C<sub>30</sub>H<sub>21</sub>ClN<sub>2</sub>O<sub>2</sub>S]<sup>+</sup>

requires 509.1085, found 509.1093. [α]<sub>D</sub><sup>25</sup> = -203 (c = 0.1, CH<sub>2</sub>Cl<sub>2</sub>). The product was analyzed by

HPLC to determine the enantiomeric excess: 98% ee (CHIRALPAK AS-H, hexane/*i*-PrOH = 95/5,

detector: 254 nm, T = 25 °C, flow rate: 1 mL/min), *t*<sub>1</sub> (minor) = 13.32 min, *t*<sub>2</sub> (major) = 16.40 min.

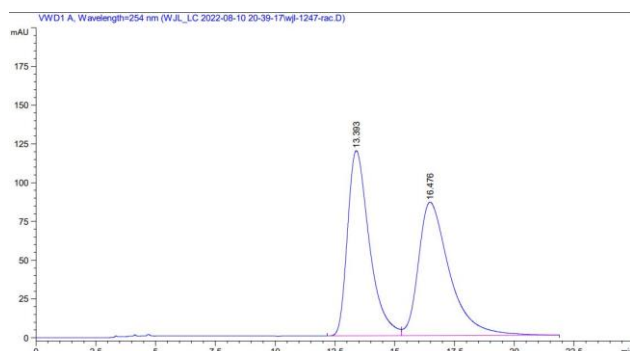

| Peak | RetTime | Area       | Height    | Area    |
|------|---------|------------|-----------|---------|
| 1    | 13.393  | 7576.88525 | 119.41000 | 49.4183 |
| 2    | 16.476  | 7755.27148 | 86.05502  | 50.5817 |

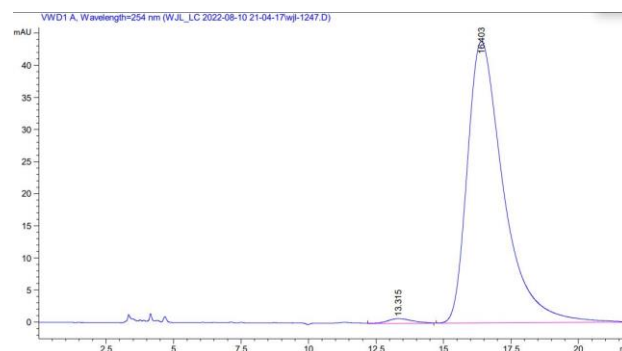

| Peak | RetTime | Area       | Height                 | Area    |
|------|---------|------------|------------------------|---------|
| 1    | 13.315  | 49.72678   | 7.59538e <sup>-1</sup> | 1.2070  |
| 2    | 16.403  | 4070.18604 | 43.83670               | 98.7930 |

**(R)-6-bromo-2-(7-methylquinolin-8-yl)-3,4-diphenyl-2H-benzo[1,2]thiazine-1,1-dioxide (5da).**

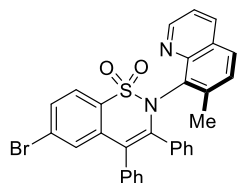

Yield: 55.6 mg (50%). White solid, mp: 215-216 °C. <sup>1</sup>H NMR (600 MHz, CDCl<sub>3</sub>)

δ 8.76 (d, *J* = 3.1 Hz, 1H), 7.99 (d, *J* = 8.2, Hz, 1H), 7.77 (d, *J* = 8.3 Hz, 1H), 7.63 (dd, *J* = 8.3, 1.8 Hz, 1H), 7.59 – 7.53 (m, 2H), 7.33 – 7.28 (m, 3H), 7.26 (t, *J* =

7.5 Hz, 2H), 7.22 (t, *J* = 7.3 Hz, 2H), 7.02 (d, *J* = 7.6 Hz, 2H), 6.86 (t, *J* = 7.4 Hz, 1H), 6.79 (t, *J* = 7.5

Hz, 2H), 2.48 (s, 3H). <sup>13</sup>C NMR (151 MHz, CDCl<sub>3</sub>) δ 150.6, 146.4, 142.6, 140.7, 137.0, 135.8, 135.4,

134.6, 132.7, 131.6, 131.4, 130.5, 129.7, 129.6, 129.1, 128.4, 128.1, 128.0, 127.4, 127.0, 126.8, 126.1,

123.4, 123.0, 120.9, 19.3. HRMS (ESI): *m/z* [M+H]<sup>+</sup> calcd for [C<sub>30</sub>H<sub>21</sub>BrN<sub>2</sub>O<sub>2</sub>S]<sup>+</sup> requires 553.0580,

found 553.0598. [α]<sub>D</sub><sup>25</sup> = -206 (c = 0.1, CH<sub>2</sub>Cl<sub>2</sub>). The product was analyzed by HPLC to determine

the enantiomeric excess: 99% ee (CHIRALPAK OD-H, hexane/*i*-PrOH = 90/10, detector: 254 nm, T = 25 °C, flow rate: 1 mL/min),  $t_1$  (minor) = 10.36 min,  $t_2$  (major) = 13.97 min.

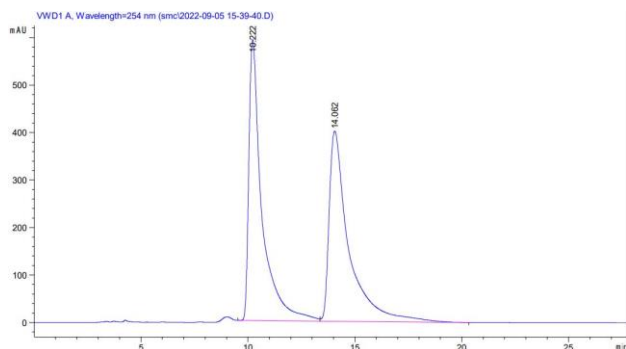

| Peak | RetTime | Area                  | Height    | Area    |
|------|---------|-----------------------|-----------|---------|
| 1    | 10.222  | 2.52181e <sup>4</sup> | 591.59351 | 49.6253 |
| 2    | 14.062  | 2.55990e <sup>4</sup> | 400.68750 | 50.3747 |

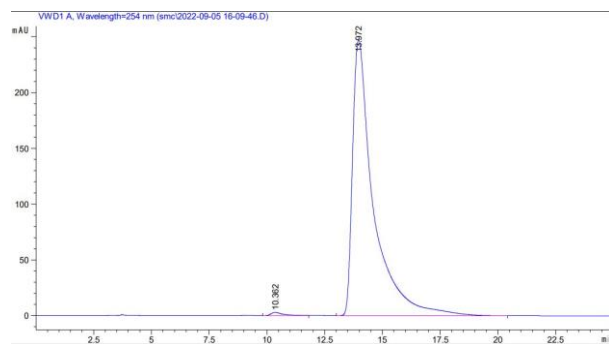

| Peak | RetTime | Area                  | Height    | Area    |
|------|---------|-----------------------|-----------|---------|
| 1    | 10.362  | 109.05839             | 2.93999   | 0.6956  |
| 2    | 13.972  | 1.55702e <sup>4</sup> | 247.23865 | 99.3044 |

**(*R*)-2-(7-methylquinolin-8-yl)-3,4-diphenyl-2*H*-benzo[1,2]thiazine-1,1-dioxide (5ea).**

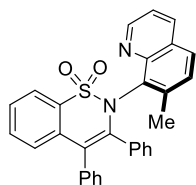

Yield: 90.1 mg (95%). White solid, mp: 232-233 °C. <sup>1</sup>H NMR (600 MHz, CDCl<sub>3</sub>) δ 8.73 (dd, *J* = 4.2, 1.7 Hz, 1H), 7.94 (dd, *J* = 8.2, 1.7 Hz, 1H), 7.88 (d, *J* = 7.7 Hz, 1H), 7.55 – 7.50 (m, 2H), 7.46 (t, *J* = 7.6 Hz, 1H), 7.38 (d, *J* = 8.2 Hz, 1H), 7.28 (d, *J* = 6.7 Hz, 2H), 7.26 – 7.19 (m, 3H), 7.19 – 7.12 (m, 2H), 7.04 (d, *J* = 7.0 Hz, 2H), 6.81 (t, *J* = 7.4 Hz, 1H), 6.74 (t, *J* = 7.5 Hz, 2H), 2.40 (s, 3H). <sup>13</sup>C NMR (151 MHz, CDCl<sub>3</sub>) δ 150.5, 146.6, 141.1, 140.6, 136.5, 135.4, 135.0, 134.9, 133.0, 132.9, 131.7, 131.3, 129.8, 129.2, 128.3, 127.9, 127.8, 127.5, 127.1, 127.0, 126.9, 126.7, 124.3, 121.3, 120.8, 19.2. HRMS (ESI): *m/z* [M+H]<sup>+</sup> calcd for [C<sub>30</sub>H<sub>22</sub>N<sub>2</sub>O<sub>2</sub>S]<sup>+</sup> requires 475.1475, found 475.1479. [α]<sub>D</sub><sup>25</sup> = -158 (*c* = 0.1, CH<sub>2</sub>Cl<sub>2</sub>). The product was analyzed by HPLC to determine the enantiomeric excess: 98% ee (CHIRALPAK OD-H, hexane/*i*-PrOH = 80/20, detector: 254 nm, T = 25 °C, flow rate: 1 mL/min),  $t_1$  (minor) = 7.66 min,  $t_2$  (major) = 9.39 min.

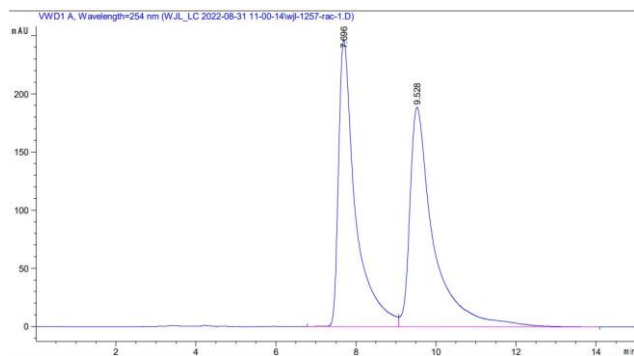

| Peak | RetTime | Area       | Height    | Area    |
|------|---------|------------|-----------|---------|
| 1    | 7.696   | 7231.02100 | 245.96959 | 48.3254 |
| 2    | 9.528   | 7732.16211 | 188.68849 | 51.6746 |

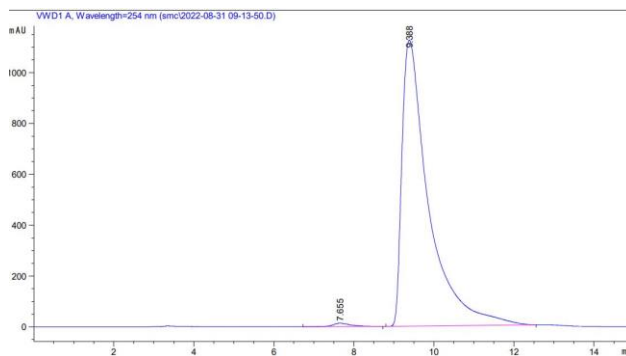

| Peak | RetTime | Area                  | Height     | Area    |
|------|---------|-----------------------|------------|---------|
| 1    | 7.655   | 454.29727             | 13.77904   | 0.8659  |
| 2    | 9.388   | 5.20081e <sup>4</sup> | 1125.47559 | 99.1341 |

**(R)-6-(tert-butyl)-2-(7-methylquinolin-8-yl)-3,4-diphenyl-2H-benzo[1,2]thiazine-1,1-dioxide**

**(5fa).**

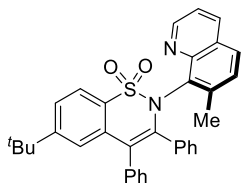

Yield: 100.6 mg (95%). White solid, mp: 219-220 °C. <sup>1</sup>H NMR (600 MHz,

CDCl<sub>3</sub>) δ 8.70 (dd, *J* = 4.2, 1.7 Hz, 1H), 7.87 (dd, *J* = 8.3, 1.7 Hz, 1H), 7.74 (d,

*J* = 8.2 Hz, 1H), 7.51 – 7.37 (m, 2H), 7.34 (d, *J* = 1.8 Hz, 1H), 7.24 – 7.17 (m,

3H), 7.14 (t, *J* = 7.5 Hz, 2H), 7.11 – 7.06 (m, 2H), 6.99 (d, *J* = 6.9 Hz, 2H), 6.75 – 6.70 (m, 1H), 6.66

(t, *J* = 7.5 Hz, 2H), 2.31 (s, 3H), 1.19 (s, 9H). <sup>13</sup>C NMR (151 MHz, CDCl<sub>3</sub>) δ 154.7, 150.5, 146.6,

140.8, 140.4, 136.7, 135.3, 135.0, 134.6, 133.2, 131.7, 130.4, 129.8, 129.2, 128.2, 127.8, 127.7, 127.0,

126.9, 126.7, 124.9, 124.5, 123.8, 121.0, 120.7, 35.3, 31.2, 19.2. HRMS (ESI): *m/z* [M+H]<sup>+</sup> calcd for

[C<sub>34</sub>H<sub>30</sub>N<sub>2</sub>O<sub>2</sub>S]<sup>+</sup> requires 531.2101, found 531.2100. [α]<sub>D</sub><sup>25</sup> = -133 (c = 0.1, CH<sub>2</sub>Cl<sub>2</sub>). The product was

analyzed by HPLC to determine the enantiomeric excess: 98% ee (CHIRALPAK AD-H, hexane/*i*-

PrOH = 90/10, detector: 254 nm, T = 25 °C, flow rate: 1 mL/min), *t*<sub>1</sub> (minor) = 21.64 min, *t*<sub>2</sub> (major)

= 24.04 min.

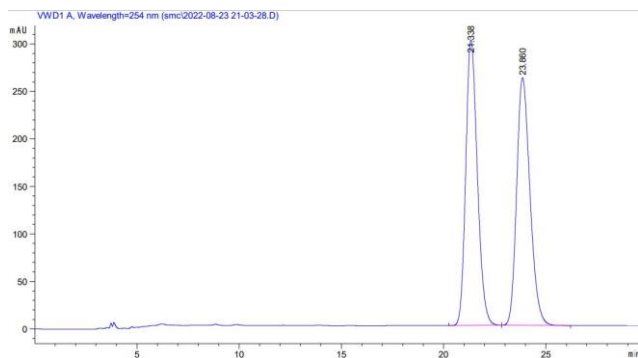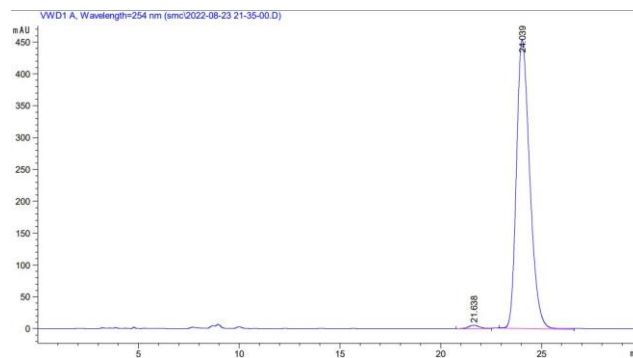

| Peak | RetTime | Area                  | Height    | Area    |
|------|---------|-----------------------|-----------|---------|
| 1    | 21.338  | 1.18531e <sup>4</sup> | 300.55734 | 50.0774 |
| 2    | 23.860  | 1.18165e <sup>4</sup> | 260.68475 | 49.9226 |

| Peak | RetTime | Area                  | Height    | Area    |
|------|---------|-----------------------|-----------|---------|
| 1    | 21.638  | 196.48929             | 5.15724   | 0.9334  |
| 2    | 24.039  | 2.08537e <sup>4</sup> | 453.26038 | 99.0666 |

**(R)- 2-(7-methylquinolin-8-yl)-3,4,6-triphenyl-2H-benzo[1,2]thiazine-1,1-dioxide (5ga).**

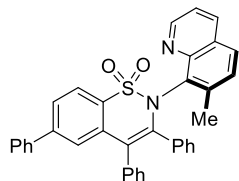

Yield: 103.6 mg (94%). White solid, mp: 239-240 °C. <sup>1</sup>H NMR (600 MHz,

CDCl<sub>3</sub>) δ 8.75 (dd, *J* = 4.2, 1.7 Hz, 1H), 8.05 – 7.83 (m, 2H), 7.67 (dd, *J* = 8.1,

1.7 Hz, 1H), 7.61 (s, 1H), 7.50 (d, *J* = 7.1 Hz, 3H), 7.41 (t, *J* = 7.7 Hz, 2H), 7.38

– 7.30 (m, 3H), 7.27 – 7.19 (m, 3H), 7.19 – 7.13 (m, 2H), 7.06 (d, *J* = 7.0 Hz, 2H), 6.80 (t, *J* = 7.4 Hz,

1H), 6.74 (t, *J* = 7.6 Hz, 2H), 2.44 (s, 3H). <sup>13</sup>C NMR (151 MHz, CDCl<sub>3</sub>) δ 150.6, 146.6, 144.3, 141.6,

140.6, 140.2, 136.5, 135.5, 135.4, 134.9, 133.0, 131.8, 131.7, 129.8, 129.2, 129.0, 128.3, 128.1, 128.0,



127.9, 127.5, 127.2, 127.0, 126.8, 126.3, 125.7, 124.4, 121.9, 120.8, 19.3. **HRMS** (ESI):  $m/z$   $[M+H]^+$  calcd for  $[C_{36}H_{26}N_2O_2S]^+$  requires 551.1788, found 551.1795.  $[\alpha]_D^{25} = -127$  ( $c = 0.1$ ,  $CH_2Cl_2$ ). The product was analyzed by HPLC to determine the enantiomeric excess: 99% ee (CHIRALPAK OD-H, hexane/*i*-PrOH = 80/20, detector: 254 nm,  $T = 25$  °C, flow rate: 1 mL/min),  $t_1$  (minor) = 9.44 min,  $t_2$  (major) = 12.81 min.

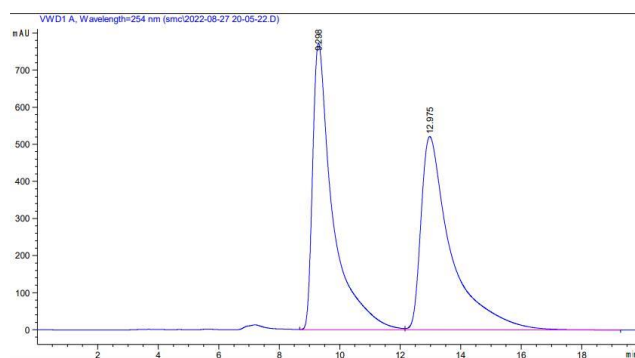

| Peak | RetTime | Area      | Height    | Area    |
|------|---------|-----------|-----------|---------|
| 1    | 9.298   | 3.58337e4 | 772.54193 | 49.9688 |
| 2    | 12.975  | 3.58785e4 | 521.12201 | 50.0312 |

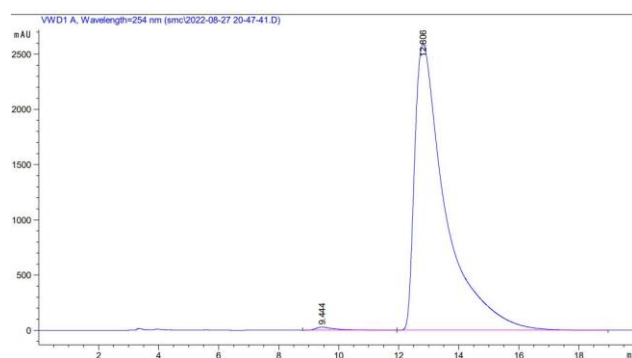

| Peak | RetTime | Area       | Height     | Area    |
|------|---------|------------|------------|---------|
| 1    | 9.444   | 1377.78796 | 28.17617   | 0.7409  |
| 2    | 12.806  | 1.84586e5  | 2590.00586 | 99.2591 |

**(R)-6-methoxy-2-(7-methylquinolin-8-yl)-3,4-diphenyl-2H-benzo[1,2]thiazine-1,1-dioxide (5ha).**

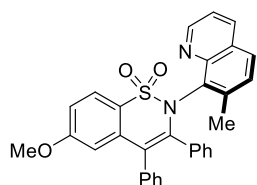

Yield: 94.8 mg (94%). White solid, mp: 203-204 °C.  $^1H$  NMR (600 MHz,  $CDCl_3$ )  $\delta$  8.79 (dd,  $J = 4.2, 1.7$  Hz, 1H), 7.93 (dd,  $J = 8.2, 1.8$  Hz, 1H), 7.82 (d,  $J = 8.6$  Hz, 1H), 7.50 (d,  $J = 8.4$  Hz, 1H), 7.32 – 7.26 (m, 2H), 7.25 (d,  $J = 8.2$  Hz, 1H), 7.20 (t,  $J = 7.5$  Hz, 2H), 7.18 – 7.12 (m, 2H), 7.05 (d,  $J = 7.0$  Hz, 2H), 6.98 (dd,  $J = 8.6, 2.5$  Hz, 1H), 6.86 (d,  $J = 2.5$  Hz, 1H), 6.84 – 6.76 (m, 1H), 6.73 (t,  $J = 7.5$  Hz, 2H), 3.75 (s, 3H), 2.42 (s, 3H).  $^{13}C$  NMR (151 MHz,  $CDCl_3$ )  $\delta$  161.9, 150.5, 146.6, 141.7, 140.5, 137.1, 136.6, 135.3, 135.0, 133.1, 131.7, 129.7, 129.2, 128.2, 127.9, 127.8, 127.1, 127.0, 126.7, 126.1, 123.9, 123.3, 120.8, 113.2, 112.0, 55.5, 19.3. **HRMS** (ESI):  $m/z$   $[M+H]^+$  calcd for  $[C_{31}H_{24}N_2O_3S]^+$  requires 505.1580, found 505.1587.  $[\alpha]_D^{25} = -139$  ( $c = 0.1$ ,  $CH_2Cl_2$ ). The product was analyzed by HPLC to determine the enantiomeric excess: 98% ee (CHIRALPAK AS-H, hexane/*i*-PrOH = 95/5, detector: 254 nm,  $T = 25$  °C, flow rate: 1 mL/min),  $t_1$  (minor) = 9.94 min,  $t_2$  (major) = 13.23 min.

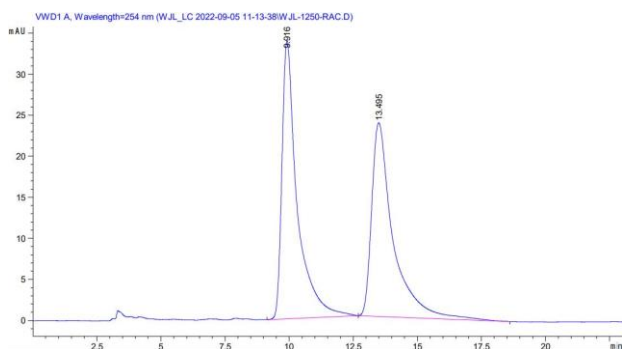

| Peak | RetTime | Area       | Height   | Area    |
|------|---------|------------|----------|---------|
| 1    | 9.916   | 1400.12427 | 33.88245 | 50.6218 |
| 2    | 13.495  | 1365.72571 | 23.59272 | 49.3782 |

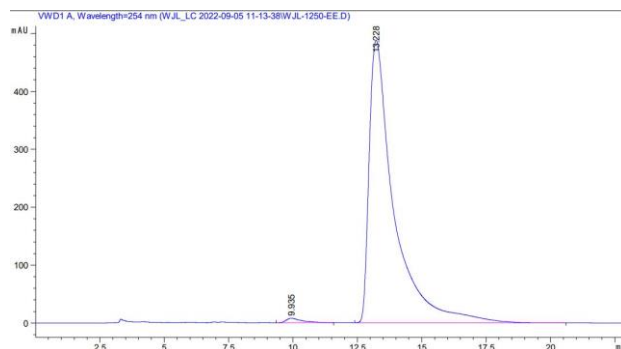

| Peak | RetTime | Area                  | Height    | Area    |
|------|---------|-----------------------|-----------|---------|
| 1    | 9.935   | 331.43689             | 7.81301   | 1.0049  |
| 2    | 13.228  | 3.26497e <sup>4</sup> | 488.15979 | 98.9951 |

**(R)-N-(2-(7-methylquinolin-8-yl)-1,1-dioxido-3,4-diphenyl-2H-benzo[1,2]thiazin-6-yl)acetamide (5ia).**

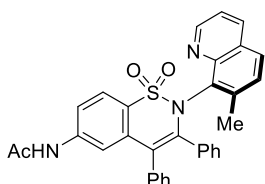

Yield: 95.0 mg (89%). White solid, mp: 226-227 °C. <sup>1</sup>H NMR (600 MHz, CDCl<sub>3</sub>) δ 8.76 (dd, *J* = 4.1, 1.8 Hz, 1H), 7.92 (d, *J* = 6.6 Hz, 2H), 7.71 (d, *J* = 8.4 Hz, 1H), 7.65 – 7.52 (m, 2H), 7.49 (d, *J* = 8.4 Hz, 1H), 7.35 – 7.22 (m, 3H),

7.19 (t, *J* = 7.5 Hz, 2H), 7.17 – 7.11 (m, 2H), 7.04 (d, *J* = 7.6 Hz, 2H), 6.80 (t, *J* = 7.4 Hz, 1H), 6.72 (t, *J* = 7.5 Hz, 2H), 2.37 (s, 3H), 2.04 (s, 3H). <sup>13</sup>C NMR (151 MHz, CDCl<sub>3</sub>) δ 168.9, 150.6, 146.5, 141.6, 141.1, 140.4, 136.3, 135.9, 135.4, 134.7, 132.9, 131.7, 129.7, 129.2, 128.4, 128.0, 127.9, 127.2, 127.0, 126.8, 123.9, 122.3, 120.9, 118.6, 117.2, 24.5, 19.2. HRMS (ESI): *m/z* [M+H]<sup>+</sup> calcd for [C<sub>32</sub>H<sub>25</sub>N<sub>3</sub>O<sub>3</sub>S]<sup>+</sup> requires 532.1689, found 532.1700. [α]<sub>D</sub><sup>25</sup> = -118 (c = 0.1, CH<sub>2</sub>Cl<sub>2</sub>). The product was analyzed by HPLC to determine the enantiomeric excess: 97% ee (CHIRALPAK AD-H, hexane/*i*-PrOH = 90/10, detector: 254 nm, T = 25 °C, flow rate: 1 mL/min), *t*<sub>1</sub> (minor) = 21.86 min, *t*<sub>2</sub> (major) = 25.34 min.

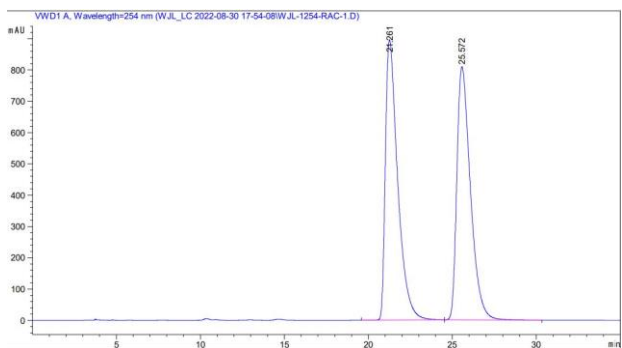

| Peak | RetTime | Area                  | Height    | Area    |
|------|---------|-----------------------|-----------|---------|
| 1    | 21.261  | 4.54743e <sup>4</sup> | 895.18158 | 50.0826 |
| 2    | 25.572  | 4.53244e <sup>4</sup> | 809.01318 | 49.9174 |

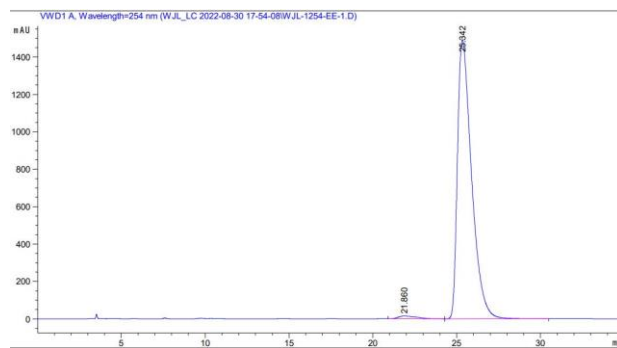

| Peak | RetTime | Area                  | Height     | Area    |
|------|---------|-----------------------|------------|---------|
| 1    | 21.860  | 1157.77478            | 14.76121   | 1.3103  |
| 2    | 25.342  | 8.71987e <sup>4</sup> | 1492.01025 | 98.6897 |

**(R)-2-(7-methylquinolin-8-yl)-3,4-diphenyl-6-(trifluoromethyl)-2H-benzo[1,2]thiazine-1,1-dioxide (5ja).**

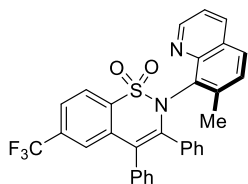

Yield: 77.9 mg (72%). White solid, mp: 192-193 °C.  $^1\text{H NMR}$  (600 MHz,  $\text{CDCl}_3$ )  $\delta$  8.64 (dd,  $J = 4.2, 1.6$  Hz, 1H), 8.10 – 7.90 (m, 2H), 7.72 (d,  $J = 8.2$  Hz, 1H), 7.65 (s, 1H), 7.55 (d,  $J = 8.3$  Hz, 1H), 7.28 – 7.21 (m, 6H), 7.19 (t,  $J = 7.7$  Hz, 1H), 6.98 (d,  $J = 7.6$  Hz, 2H), 6.85 (t,  $J = 7.5$  Hz, 1H), 6.77 (t,  $J = 7.5$  Hz, 2H), 2.45 (s, 3H).  $^{13}\text{C NMR}$  (151 MHz,  $\text{CDCl}_3$ )  $\delta$  150.5, 146.4, 142.8, 140.9, 135.9, 135.6, 135.5, 135.0, 134.5, 133.2 (q,  $^2J_{\text{C-F}} = 32.5$  Hz) 132.6, 131.5, 129.6, 129.1, 128.5, 128.2, 128.1, 127.5, 127.0, 126.9, 124.1 (q,  $^3J_{\text{C-F}} = 4.0$  Hz), 124.0, 123.9, 123.8, 123.6 (q,  $^1J_{\text{C-F}} = 273.0$  Hz), 122.3, 120.9, 19.3.  $^{19}\text{F NMR}$  (565 MHz,  $\text{CDCl}_3$ )  $\delta$  -62.7. HRMS (ESI):  $m/z$   $[\text{M}+\text{H}]^+$  calcd for  $[\text{C}_{31}\text{H}_{21}\text{F}_3\text{N}_2\text{O}_2\text{S}]^+$  requires 543.1349, found 543.1352.  $[\alpha]_{\text{D}}^{25} = -225$  ( $c = 0.1$ ,  $\text{CH}_2\text{Cl}_2$ ). The product was analyzed by HPLC to determine the enantiomeric excess: 98% ee (CHIRALPAK OD-H, hexane/*i*-PrOH = 95/5, detector: 254 nm, T = 25 °C, flow rate: 1 mL/min),  $t_1$  (minor) = 11.61 min,  $t_2$  (major) = 17.21 min.

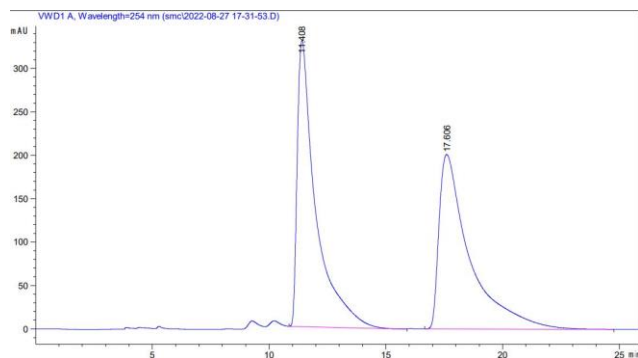

| Peak | RetTime | Area                  | Height    | Area    |
|------|---------|-----------------------|-----------|---------|
| 1    | 11.408  | 1.81699e <sup>4</sup> | 329.69110 | 49.8285 |
| 2    | 17.606  | 1.82950e <sup>4</sup> | 201.10814 | 50.1715 |

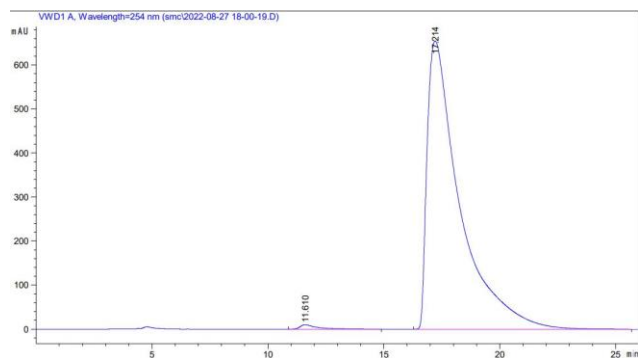

| Peak | RetTime | Area                  | Height    | Area    |
|------|---------|-----------------------|-----------|---------|
| 1    | 11.610  | 514.76831             | 9.98517   | 0.7990  |
| 2    | 17.214  | 6.39128e <sup>4</sup> | 654.75549 | 99.2010 |

**(R)- 8-fluoro-2-(7-methylquinolin-8-yl)-3,4-diphenyl-2H-benzo[1,2]thiazine 1,1-dioxide (5ka).**

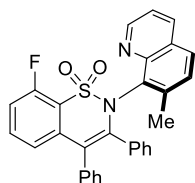

Yield: 42.2 mg (43%). White solid, mp: 215-216 °C.  $^1\text{H NMR}$  (600 MHz,  $\text{CDCl}_3$ )  $\delta$  8.68 (dd,  $J = 4.3, 1.7$  Hz, 1H), 7.96 (d,  $J = 8.2$  Hz, 1H), 7.54 (d,  $J = 8.4$  Hz, 1H), 7.48 – 7.40 (m, 1H), 7.30 – 7.17 (m, 6H), 7.16 – 7.10 (m, 3H), 6.97 (d,  $J = 7.1$  Hz, 2H), 6.84 (t,  $J = 7.3$  Hz, 1H), 6.76 (t,  $J = 7.5$  Hz, 2H), 2.46 (s, 3H).  $^{13}\text{C NMR}$  (151 MHz,  $\text{CDCl}_3$ )  $\delta$  156.7 (d,  $^1J_{\text{C-F}} = 255.7$  Hz), 150.4, 146.6, 141.7, 141.0, 138.2, 136.4, 135.5, 134.7, 132.8, 132.1 (d,  $^3J_{\text{C-F}} = 8.8$  Hz), 131.6, 129.5, 129.2, 128.4, 128.0, 127.9, 127.2, 127.0, 126.8, 124.5 (d,  $^4J_{\text{C-F}} = 2.2$  Hz), 123.1

(d,  $^4J_{C-F} = 3.3$  Hz), 121.8 (d,  $^2J_{C-F} = 14.1$  Hz), 120.8, 114.8 (d,  $^2J_{C-F} = 20.8$  Hz), 19.4.  $^{19}\text{F}$  NMR (565 MHz,  $\text{CDCl}_3$ )  $\delta$  -114.4. **HRMS** (ESI):  $m/z$   $[\text{M}+\text{H}]^+$  calcd for  $[\text{C}_{30}\text{H}_{21}\text{FN}_2\text{O}_2\text{S}]^+$  requires 493.1381, found 493.1390.  $[\alpha]_{\text{D}}^{25} = -213$  ( $c = 0.1$ ,  $\text{CH}_2\text{Cl}_2$ ). The product was analyzed by HPLC to determine the enantiomeric excess: 97% ee (CHIRALPAK AD-H, hexane/*i*-PrOH = 80/20, detector: 254 nm,  $T = 25$  °C, flow rate: 1 mL/min),  $t_1$  (major) = 7.09 min,  $t_2$  (minor) = 14.46 min.

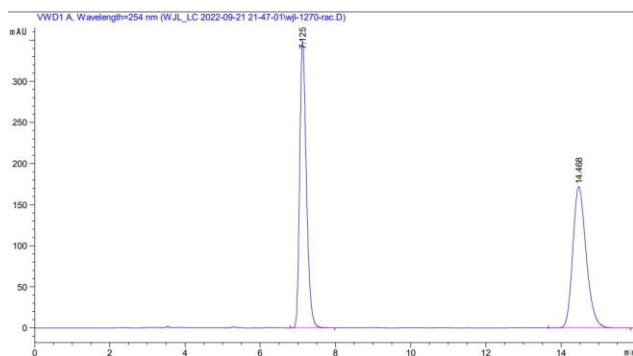

| Peak | RetTime | Area       | Height    | Area    |
|------|---------|------------|-----------|---------|
| 1    | 7.125   | 4295.34277 | 348.51236 | 50.2657 |
| 2    | 14.468  | 4249.94043 | 172.11548 | 49.7343 |

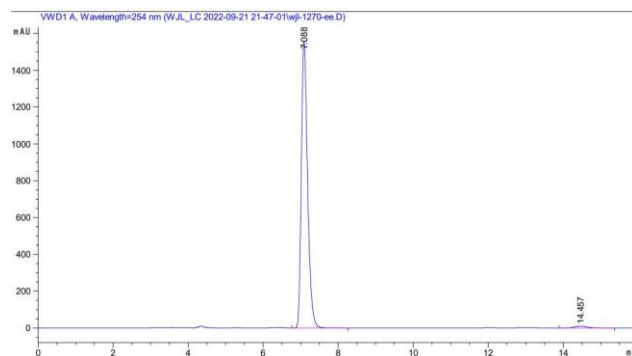

| Peak | RetTime | Area                  | Height     | Area    |
|------|---------|-----------------------|------------|---------|
| 1    | 7.088   | 1.80252e <sup>4</sup> | 1557.64685 | 98.6773 |
| 2    | 14.457  | 241.61351             | 9.99804    | 1.3227  |

**(*R*)-7-chloro-2-(7-methylquinolin-8-yl)-3,4-diphenyl-2*H*-benzo[1,2]thiazine 1,1-dioxide (5na).**

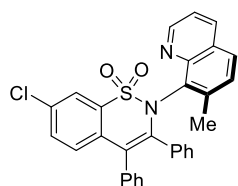

Yield: 85.9 mg (84%). White solid, mp: 184-185 °C.  $^1\text{H}$  NMR (600 MHz,  $\text{CDCl}_3$ )  $\delta$  8.72 (dd,  $J = 4.2, 1.7$  Hz, 1H), 7.98 (dd,  $J = 8.2, 1.7$  Hz, 1H), 7.86 (d,  $J = 2.2$  Hz, 1H), 7.55 (d,  $J = 8.4$  Hz, 1H), 7.48 (dd,  $J = 8.7, 2.2$  Hz, 1H), 7.32 (d,  $J = 8.7$  Hz, 1H), 7.28 (dd,  $J = 8.2, 4.2$  Hz, 1H), 7.26 – 7.16 (m, 6H), 6.99 (d,  $J = 7.0$  Hz, 2H), 6.84 (t,  $J = 7.4$  Hz, 1H), 6.76 (t,  $J = 7.6$  Hz, 2H), 2.43 (s, 3H).  $^{13}\text{C}$  NMR (151 MHz,  $\text{CDCl}_3$ )  $\delta$  150.6, 146.4, 141.3, 140.7, 136.1, 135.4, 134.6, 133.7, 133.6, 133.1, 132.7, 131.6, 131.4, 129.7, 129.2, 128.6, 128.4, 128.0, 127.9, 127.3, 127.0, 126.8, 123.9, 121.3, 120.9, 19.3. **HRMS** (ESI):  $m/z$   $[\text{M}+\text{H}]^+$  calcd for  $[\text{C}_{30}\text{H}_{21}\text{ClN}_2\text{O}_2\text{S}]^+$  requires 509.1085, found 509.1089.  $[\alpha]_{\text{D}}^{25} = -216$  ( $c = 0.1$ ,  $\text{CH}_2\text{Cl}_2$ ). The product was analyzed by HPLC to determine the enantiomeric excess: 98% ee (CHIRALPAK AS-H, hexane/*i*-PrOH = 95/5, detector: 254 nm,  $T = 25$  °C, flow rate: 0.5 mL/min),  $t_1$  (minor) = 27.12 min,  $t_2$  (major) = 31.96 min.

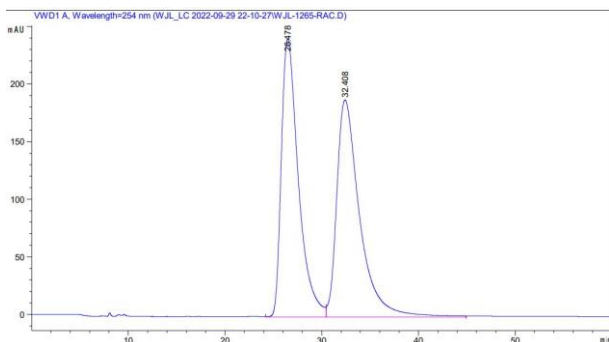

| Peak | RetTime | Area                  | Height    | Area    |
|------|---------|-----------------------|-----------|---------|
| 1    | 26.478  | 2.96194e <sup>4</sup> | 241.30435 | 48.7792 |
| 2    | 32.408  | 3.11019e <sup>4</sup> | 188.63194 | 51.2208 |

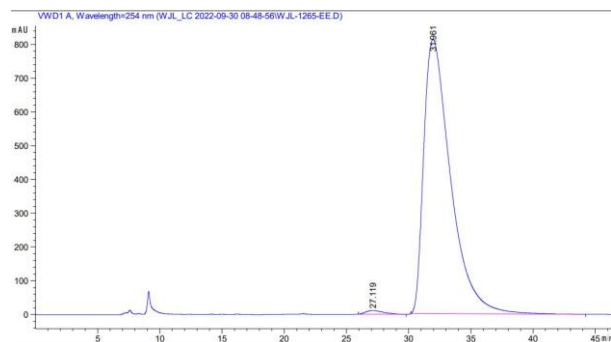

| Peak | RetTime | Area                  | Height    | Area    |
|------|---------|-----------------------|-----------|---------|
| 1    | 27.119  | 1086.30505            | 10.79943  | 0.8835  |
| 2    | 31.961  | 1.21867e <sup>5</sup> | 812.50787 | 99.1165 |

**(R)-7-bromo-2-(7-methylquinolin-8-yl)-3,4-diphenyl-2H-benzo[1,2]thiazine 1,1-dioxide (50a).**

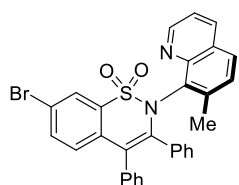

Yield: 89.6 mg (81%). White solid, mp: 175-176 °C. <sup>1</sup>H NMR (600 MHz, CDCl<sub>3</sub>)

δ 8.71 (dd, *J* = 4.2, 1.7 Hz, 1H), 8.00 (d, *J* = 2.1 Hz, 1H), 7.96 (dd, *J* = 8.2, 1.7 Hz, 1H), 7.62 (dd, *J* = 8.7, 2.1 Hz, 1H), 7.53 (d, *J* = 8.4 Hz, 1H), 7.28 – 7.19 (m,

7H), 7.18 – 7.14 (m, 1H), 6.99 (d, *J* = 7.1 Hz, 2H), 6.83 (t, *J* = 7.4 Hz, 1H), 6.75 (t, *J* = 7.6 Hz, 2H),

2.42 (s, 3H). <sup>13</sup>C NMR (151 MHz, CDCl<sub>3</sub>) δ 150.6, 146.4, 141.6, 140.7, 136.0, 135.5, 134.6, 134.3,

134.0, 133.8, 132.7, 131.6, 129.6, 129.2, 128.8, 128.5, 128.0, 127.3, 127.0, 126.8, 124.1, 124.0, 120.9,

120.7, 19.3 HRMS (ESI): *m/z* [M+H]<sup>+</sup> calcd for [C<sub>30</sub>H<sub>21</sub>BrN<sub>2</sub>O<sub>2</sub>S]<sup>+</sup> requires 553.0580, found

553.0592. [α]<sub>D</sub><sup>25</sup> = -199 (c = 0.1, CH<sub>2</sub>Cl<sub>2</sub>). The product was analyzed by HPLC to determine the

enantiomeric excess: 98% ee (CHIRALPAK AS-H, hexane/*i*-PrOH = 95/5, detector: 254 nm, T =

25 °C, flow rate: 0.5 mL/min), *t*<sub>1</sub> (minor) = 28.21 min, *t*<sub>2</sub> (major) = 33.20 min.

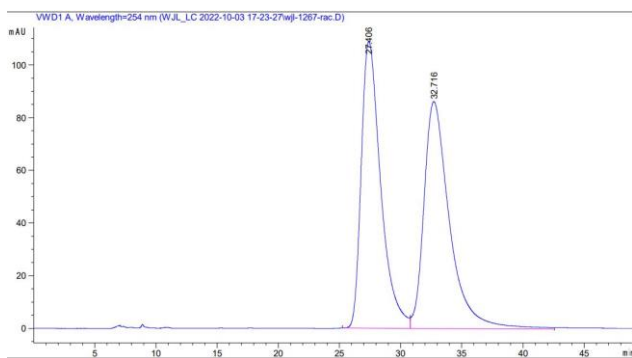

| Peak | RetTime | Area                  | Height    | Area    |
|------|---------|-----------------------|-----------|---------|
| 1    | 27.406  | 1.20488e <sup>4</sup> | 108.79118 | 48.9646 |
| 2    | 32.716  | 1.25584e <sup>4</sup> | 86.13596  | 51.0354 |

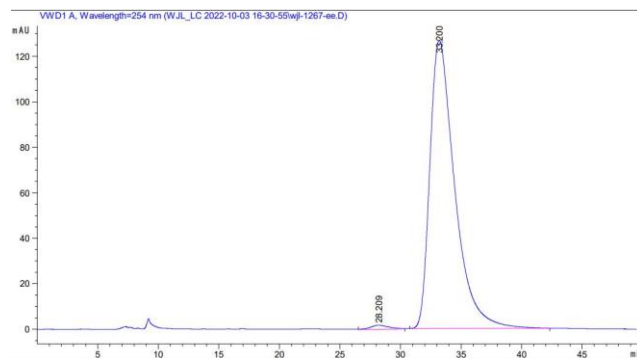

| Peak | RetTime | Area                  | Height    | Area    |
|------|---------|-----------------------|-----------|---------|
| 1    | 28.209  | 195.25334             | 1.76910   | 1.0718  |
| 2    | 33.200  | 1.80219e <sup>4</sup> | 126.70089 | 98.9282 |

**(R)-6,8-difluoro-2-(7-methylquinolin-8-yl)-3,4-diphenyl-2H-benzo[1,2]thiazine 1,1-dioxide (5pa).**

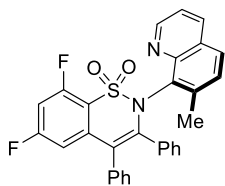

Yield: 23.5 mg (24%). White solid, mp: 215-216 °C.  $^1\text{H NMR}$  (600 MHz,  $\text{CDCl}_3$ )

$\delta$  8.69 (dd,  $J = 4.2, 1.7$  Hz, 1H), 8.00 (dd,  $J = 8.2, 1.7$  Hz, 1H), 7.57 (d,  $J = 8.4$  Hz, 1H), 7.29 (dd,  $J = 8.2, 4.2$  Hz, 1H), 7.25 – 7.07 (m, 6H), 6.96 – 6.81 (m, 5H), 6.78

(t,  $J = 7.6$  Hz, 2H), 2.50 (s, 3H).  $^{13}\text{C NMR}$  (151 MHz,  $\text{CDCl}_3$ )  $\delta$  163.8 (dd,  $^1J_{\text{C-F}} = 253.2, 12.3$  Hz), 157.7 (dd,  $^1J_{\text{C-F}} = 258.0, 14.4$  Hz), 150.5, 146.46, 142.96, 141.21, 139.98 (d,  $^2J_{\text{C-F}} = 10.4$  Hz), 135.82, 135.51, 134.52, 132.56, 131.50, 129.36, 129.16, 128.52, 128.13, 127.49, 127.02, 126.89, 123.91 (t,  $^4J_{\text{C-F}} = 2.3$  Hz), 120.88, 118.29 (dd,  $J = 14.0, 3.4$  Hz), 109.83 (dd,  $J = 24.2, 3.8$  Hz), 103.5 (t,  $^2J_{\text{C-F}} = 25.9$  Hz), 19.42.  $^{19}\text{F NMR}$  (565 MHz,  $\text{CDCl}_3$ )  $\delta$  -103.3, -109.5. **HRMS** (ESI):  $m/z$   $[\text{M}+\text{H}]^+$  calcd for  $[\text{C}_{30}\text{H}_{20}\text{F}_2\text{N}_2\text{O}_2\text{S}]^+$  requires 511.1286, found 511.1291.  $[\alpha]_{\text{D}}^{25} = -194$  ( $c = 0.1, \text{CH}_2\text{Cl}_2$ ). The product was analyzed by HPLC to determine the enantiomeric excess: 97% ee (CHIRALPAK AD-H, hexane/*i*-PrOH = 80/20, detector: 254 nm,  $T = 25$  °C, flow rate: 1 mL/min),  $t_1$  (major) = 5.75 min,  $t_2$  (minor) = 8.38 min.

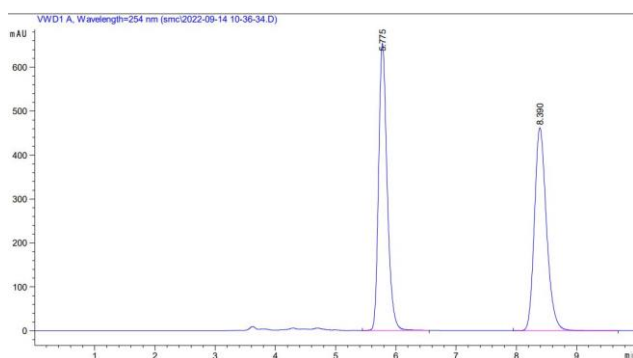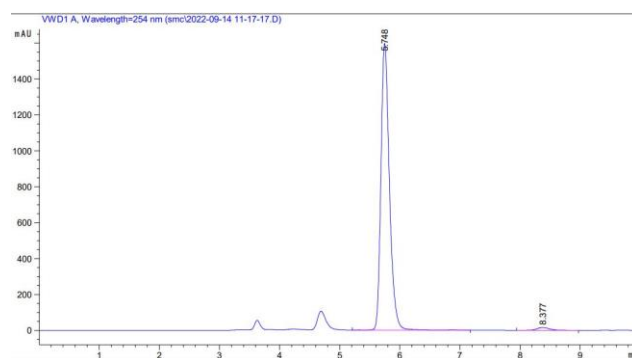

| Peak | RetTime | Area       | Height    | Area    |
|------|---------|------------|-----------|---------|
| 1    | 5.775   | 6421.53857 | 653.07355 | 49.8803 |
| 2    | 8.390   | 6452.36670 | 462.17502 | 50.1197 |

| Peak | RetTime | Area      | Height     | Area    |
|------|---------|-----------|------------|---------|
| 1    | 5.748   | 1.56536e4 | 1597.87622 | 98.5978 |
| 2    | 8.377   | 222.61229 | 15.91588   | 1.4022  |

**(R)-6,7-dimethoxy-2-(7-methylquinolin-8-yl)-3,4-diphenyl-2H-benzo[1,2]thiazine 1,1-dioxide (5qa).**

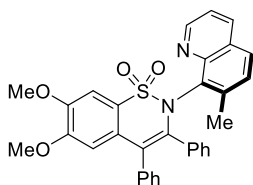

Yield: 102.6 mg (96%). White solid, mp: 205-206 °C.  $^1\text{H NMR}$  (600 MHz,

$\text{CDCl}_3$ )  $\delta$  8.83 (dd,  $J = 4.2, 1.7$  Hz, 1H), 7.94 (dd,  $J = 14.6, 8.6$  Hz, 1H), 7.50 (dd,  $J = 9.5, 5.6$  Hz, 1H), 7.35 (s, 1H), 7.32 – 7.20 (m, 5H), 7.19 – 7.14 (m, 2H),

7.07 (d,  $J = 7.2$  Hz, 2H), 6.84 (s, 1H), 6.78 (t,  $J = 7.2$  Hz, 1H), 6.73 (t,  $J = 7.5$  Hz, 2H), 3.89 (s, 3H), 3.74 (s, 3H), 2.40 (s, 3H).  $^{13}\text{C NMR}$  (151 MHz,  $\text{CDCl}_3$ )  $\delta$  151.4, 150.6, 148.8, 146.6, 140.4, 139.7, 136.8, 135.4, 134.9, 133.0, 131.6, 129.9, 129.2, 129.1, 128.2, 128.0, 127.7, 127.1, 127.0, 126.7, 125.7,

123.8, 120.8, 109.3, 103.5, 56.3, 56.0, 19.2. **HRMS** (ESI):  $m/z$   $[M+H]^+$  calcd for  $[C_{32}H_{26}N_2O_4S]^+$  requires 535.1686, found 535.1686.  $[\alpha]_D^{25} = -170$  ( $c = 0.1$ ,  $CH_2Cl_2$ ). The product was analyzed by HPLC to determine the enantiomeric excess: 97% ee (CHIRALPAK AD-H, hexane/*i*-PrOH = 80/20, detector: 254 nm,  $T = 25$  °C, flow rate: 1 mL/min),  $t_1$  (major) = 18.45 min,  $t_2$  (minor) = 29.58 min.

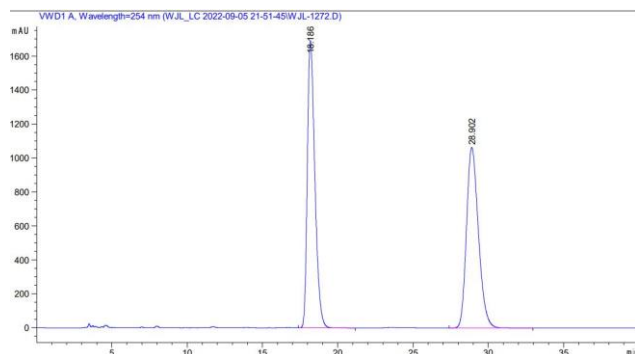

| Peak | RetTime | Area                  | Height     | Area    |
|------|---------|-----------------------|------------|---------|
| 1    | 18.186  | 5.87425e <sup>4</sup> | 1691.00439 | 50.1201 |
| 2    | 28.902  | 5.84610e <sup>4</sup> | 1063.09717 | 49.8799 |

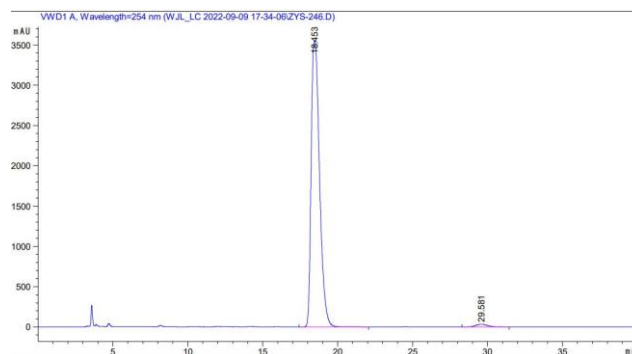

| Peak | RetTime | Area                  | Height     | Area    |
|------|---------|-----------------------|------------|---------|
| 1    | 18.453  | 1.37744e <sup>5</sup> | 3548.21143 | 98.6671 |
| 2    | 29.581  | 1860.73816            | 33.63058   | 1.3329  |

**(R)-2-(7-methylquinolin-8-yl)-3,4-diphenyl-2H-thieno[1,2]thiazine-1,1-dioxide (5ra).**

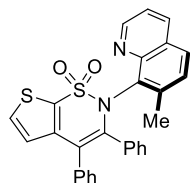

Yield: 23.2 mg (24%). White solid, mp: 199-200 °C. **<sup>1</sup>H NMR** (600 MHz,  $CDCl_3$ )  $\delta$  8.92 (dd,  $J = 4.2, 1.7$  Hz, 1H), 7.96 (dd,  $J = 8.2, 1.7$  Hz, 1H), 7.52 (d,  $J = 8.4$  Hz, 1H), 7.47 (d,  $J = 5.2$  Hz, 1H), 7.31 (dd,  $J = 8.2, 4.2$  Hz, 1H), 7.26 (t,  $J = 7.3$  Hz, 2H), 7.22 (t,  $J = 7.4$  Hz, 2H), 7.19 – 7.14 (m, 2H), 7.11 – 7.08 (m, 2H), 7.04 (d,  $J = 5.2$  Hz, 1H), 6.81 (t,  $J = 7.4$  Hz, 1H), 6.72 (t,  $J = 7.7$  Hz, 2H), 2.38 (s, 3H). **<sup>13</sup>C NMR** (151 MHz,  $CDCl_3$ )  $\delta$  150.7, 146.6, 143.4, 140.8, 140.3, 137.2, 135.4, 134.2, 133.0, 130.8, 130.0, 129.2, 128.5, 128.1, 128.0, 127.9, 127.0, 126.9, 126.8, 126.3, 121.9, 120.9, 19.0. **HRMS** (ESI):  $m/z$   $[M+H]^+$  calcd for  $[C_{28}H_{20}N_2O_2S_2]^+$  requires 481.1039, found 481.1040.  $[\alpha]_D^{25} = -157$  ( $c = 0.1$ ,  $CH_2Cl_2$ ). The product was analyzed by HPLC to determine the enantiomeric excess: 99% ee (CHIRALPAK OD-H, hexane/*i*-PrOH = 80/20, detector: 254 nm,  $T = 25$  °C, flow rate: 1 mL/min),  $t_1$  (minor) = 9.24 min,  $t_2$  (major) = 11.64 min.

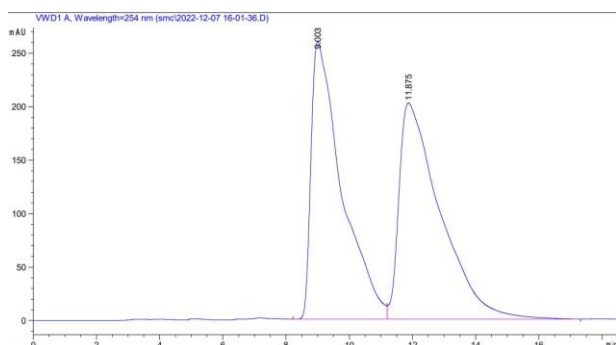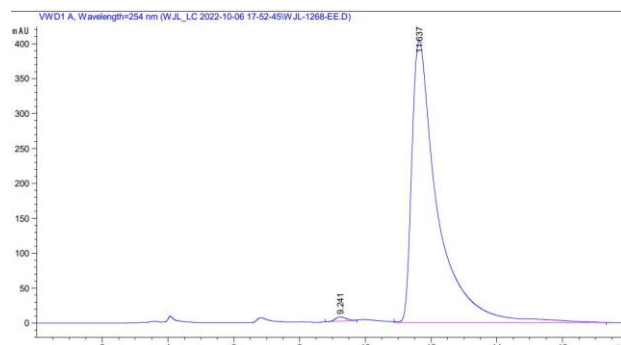



| Peak | RetTime | Area                  | Height    | Area    |
|------|---------|-----------------------|-----------|---------|
| 1    | 9.003   | 1.73891e <sup>4</sup> | 259.67963 | 48.7374 |
| 2    | 11.875  | 1.82901e <sup>4</sup> | 202.24532 | 51.2626 |

| Peak | RetTime | Area                  | Height    | Area    |
|------|---------|-----------------------|-----------|---------|
| 1    | 9.241   | 136.98273             | 5.78675   | 0.6199  |
| 2    | 11.637  | 2.19605e <sup>4</sup> | 403.85309 | 99.3801 |

**(R)-2-(7-methylquinolin-8-yl)-3,4-diphenyl-2H-naphtho[1,2]thiazine 1,1-dioxide (5sa).**

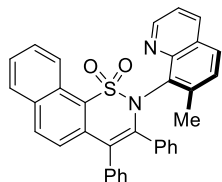

Yield: 87.1 mg (83%). White solid, mp: 131-132 °C. <sup>1</sup>H NMR (600 MHz, CDCl<sub>3</sub>)

δ 9.09 (dd, *J* = 8.6, 1.3 Hz, 1H), 8.74 (dd, *J* = 4.3, 1.7 Hz, 1H), 7.93 (dd, *J* = 8.2, 1.7 Hz, 1H), 7.90 (d, *J* = 9.2 Hz, 1H), 7.85 (d, *J* = 6.8 Hz, 1H), 7.58 – 7.48 (m, 3H),

7.45 (d, *J* = 8.9 Hz, 1H), 7.36 – 7.30 (m, 2H), 7.25 – 7.21 (m, 3H), 7.19 (t, *J* = 8.1 Hz, 2H), 7.12 – 7.07 (m, 2H), 6.83 (t, *J* = 7.4 Hz, 1H), 6.77 (t, *J* = 7.5 Hz, 2H), 2.42 (s, 3H). <sup>13</sup>C NMR (151 MHz, CDCl<sub>3</sub>)

δ 150.6, 146.6, 141.5, 140.7, 136.9, 135.3, 134.9, 134.6, 133.2, 132.6, 132.0, 131.6, 129.7, 129.1, 128.4, 128.2, 128.1, 127.9, 127.8, 127.5, 127.2, 127.1, 126.9, 126.7, 126.5, 124.7, 124.4, 124.3, 120.7,

19.2. **HRMS** (ESI): *m/z* [M+H]<sup>+</sup> calcd for [C<sub>34</sub>H<sub>24</sub>N<sub>2</sub>O<sub>2</sub>S]<sup>+</sup> requires 525.1631, found 525.1644. [α]<sub>D</sub><sup>25</sup>

= -242 (c = 0.1, CH<sub>2</sub>Cl<sub>2</sub>). The product was analyzed by HPLC to determine the enantiomeric excess:

98% ee (CHIRALPAK AS-H, hexane/*i*-PrOH = 95/5, detector: 254 nm, T = 25 °C, flow rate: 0.5

mL/min), *t*<sub>1</sub> (minor) = 62.21 min, *t*<sub>2</sub> (major) = 71.99 min.

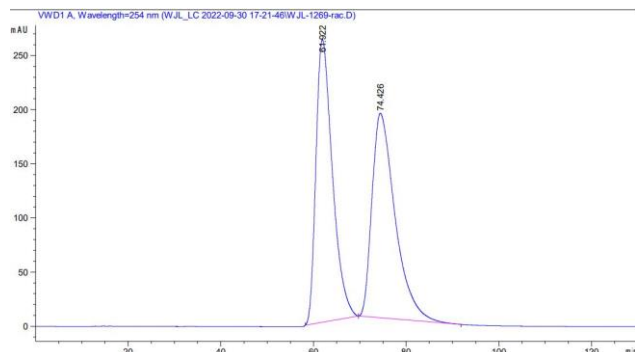

| Peak | RetTime | Area                  | Height    | Area    |
|------|---------|-----------------------|-----------|---------|
| 1    | 61.922  | 6.45490e <sup>4</sup> | 261.19769 | 49.5591 |
| 2    | 74.426  | 6.56976e <sup>4</sup> | 189.05763 | 50.4409 |

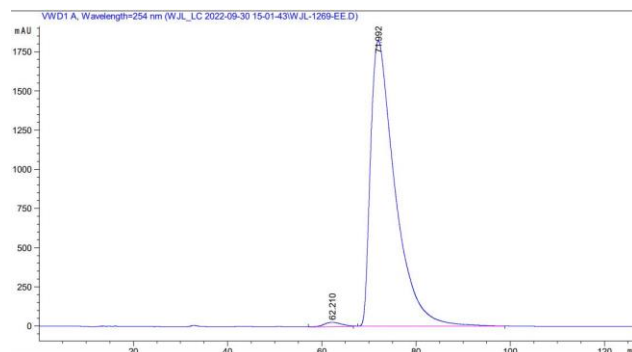

| Peak | RetTime | Area                  | Height     | Area    |
|------|---------|-----------------------|------------|---------|
| 1    | 62.210  | 7333.42480            | 28.00846   | 1.1011  |
| 2    | 71.992  | 6.58646e <sup>5</sup> | 1823.29053 | 98.8989 |

**(R)-2-(7-ethylquinolin-8-yl)-6-methyl-3,4-diphenyl-2H-benzo[1,2]thiazine-1,1-dioxide (5ua).**

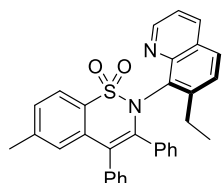

Yield: 79.1 mg (79%). White solid, mp: 213-214 °C. <sup>1</sup>H NMR (600 MHz, CDCl<sub>3</sub>)

δ 8.72 (dd, *J* = 4.2, 1.7 Hz, 1H), 7.95 (dd, *J* = 8.2, 1.7 Hz, 1H), 7.77 (d, *J* = 7.9 Hz, 1H), 7.58 (d, *J* = 8.5 Hz, 1H), 7.32 – 7.24 (m, 5H), 7.21 (t, *J* = 7.3 Hz, 2H), 7.18 –

7.10 (m, 2H), 6.97 (d, *J* = 7.0 Hz, 2H), 6.80 (t, *J* = 7.4 Hz, 1H), 6.73 (t, *J* = 7.5 Hz, 2H), 3.00 – 2.86

(m, 1H), 2.80 – 2.69 (m, 1H), 2.38 (s, 3H), 1.10 (t, *J* = 7.6 Hz, 3H). <sup>13</sup>C NMR (151 MHz, CDCl<sub>3</sub>) δ



150.4, 146.6, 146.3, 141.6, 141.3, 136.7, 135.3, 135.1, 135.0, 132.0, 131.7, 130.2, 129.9, 128.6, 128.4, 127.8, 127.7, 127.2, 127.0, 126.9, 126.7, 124.1, 121.3, 120.8, 24.8, 22.0, 14.4. **HRMS** (ESI):  $m/z$   $[M+H]^+$  calcd for  $[C_{32}H_{26}N_2O_2S]^+$  requires 503.1788, found 503.1798.  $[\alpha]_D^{25} = -106$  ( $c = 0.1$ ,  $CH_2Cl_2$ ). The product was analyzed by HPLC to determine the enantiomeric excess: 99% ee (CHIRALPAK OD-H, hexane/*i*-PrOH = 95/5, detector: 254 nm,  $T = 25$  °C, flow rate: 1 mL/min),  $t_1$  (minor) = 15.73 min,  $t_2$  (major) = 18.47 min.

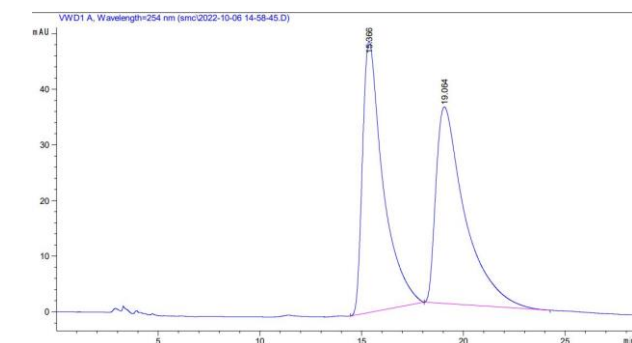

| Peak | RetTime | Area       | Height   | Area    |
|------|---------|------------|----------|---------|
| 1    | 15.366  | 3430.74194 | 48.79355 | 49.6472 |
| 2    | 19.064  | 3479.50146 | 35.32418 | 50.3528 |

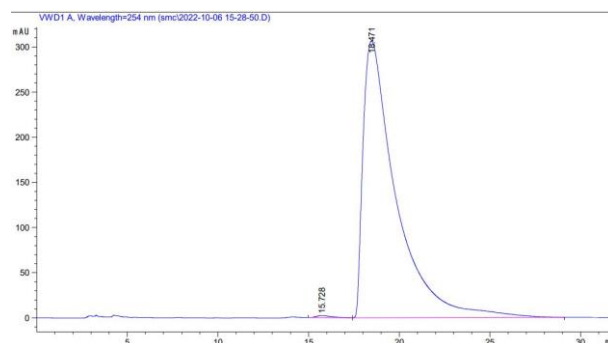

| Peak | RetTime | Area                  | Height    | Area    |
|------|---------|-----------------------|-----------|---------|
| 1    | 15.728  | 134.98059             | 2.30117   | 0.3475  |
| 2    | 18.471  | 3.87045e <sup>4</sup> | 306.33740 | 99.6525 |

**(R)-2-(7-butylquinolin-8-yl)-6-methyl-3,4-diphenyl-2H-benzo[1,2]thiazine-1,1-dioxide (5va).**

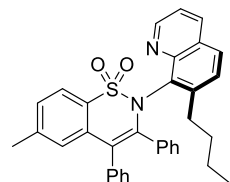

Yield: 88.0 mg (83%). White solid, mp: 195-196 °C. **<sup>1</sup>H NMR** (600 MHz,  $CDCl_3$ )  $\delta$  8.83 (dd,  $J = 4.2, 1.7$  Hz, 1H), 7.94 (dd,  $J = 8.2, 1.7$  Hz, 1H), 7.77 (d,  $J = 7.9$  Hz, 1H), 7.55 (d,  $J = 8.4$  Hz, 1H), 7.34 – 7.25 (m, 4H), 7.24 – 7.19 (m, 3H), 7.18 – 7.12 (m, 2H), 7.08 – 6.98 (m, 2H), 6.78 (t,  $J = 7.4$  Hz, 1H), 6.72 (t,  $J = 7.6$  Hz, 2H), 2.79 – 2.70 (m, 1H), 2.61 – 2.52 (m, 1H), 2.38 (s, 3H), 1.51 – 1.37 (m, 1H), 1.35 – 1.25 (m, 1H), 1.24 – 1.14 (m, 1H), 1.13 – 1.01 (m, 1H), 0.76 (t,  $J = 7.3$  Hz, 3H). **<sup>13</sup>C NMR** (151 MHz,  $CDCl_3$ )  $\delta$  150.5, 146.8, 145.0, 141.6, 141.3, 136.7, 135.2, 134.9, 132.3, 131.7, 130.6, 130.0, 128.4, 128.3, 127.8, 127.7, 127.2, 127.0, 126.9, 126.6, 124.1, 121.4, 120.8, 32.7, 31.8, 23.0, 21.9, 13.8. **HRMS** (ESI):  $m/z$   $[M+H]^+$  calcd for  $[C_{34}H_{30}N_2O_2S]^+$  requires 531.2101, found 531.2109.  $[\alpha]_D^{25} = -71$  ( $c = 0.1$ ,  $CH_2Cl_2$ ). The product was analyzed by HPLC to determine the enantiomeric excess: 99% ee (CHIRALPAK AD-H, hexane/*i*-PrOH = 80/20, detector: 254 nm,  $T = 25$  °C, flow rate: 1 mL/min),  $t_1$  (major) = 10.28 min,  $t_2$  (minor) = 24.32 min.

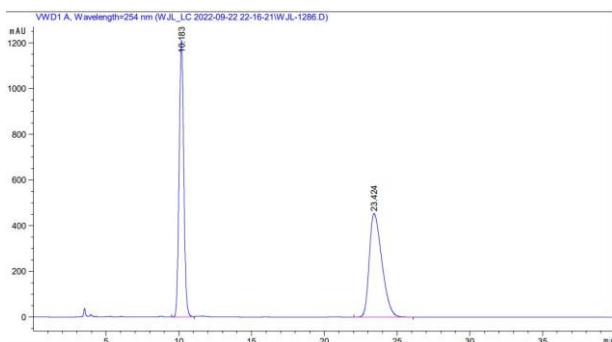

| Peak | RetTime | Area                  | Height     | Area    |
|------|---------|-----------------------|------------|---------|
| 1    | 10.183  | 2.69170e <sup>4</sup> | 1212.08813 | 49.7688 |
| 2    | 23.424  | 2.71670e <sup>4</sup> | 453.33005  | 50.2312 |

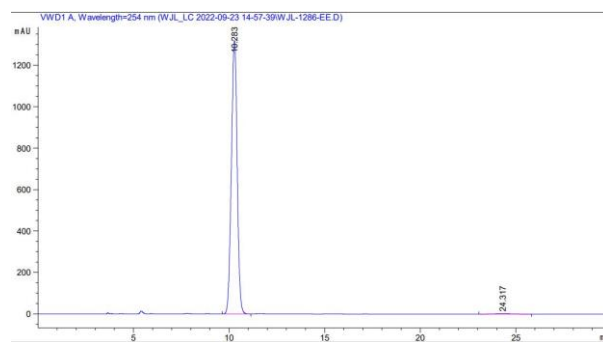

| Peak | RetTime | Area                  | Height     | Area    |
|------|---------|-----------------------|------------|---------|
| 1    | 10.283  | 2.78897e <sup>4</sup> | 1319.19910 | 99.5166 |
| 2    | 24.317  | 135.47023             | 2.31060    | 0.4834  |

**(R)-2-(7-chloroquinolin-8-yl)-6-methyl-3,4-diphenyl-2H-benzo[1,2]thiazine 1,1-dioxide (5wa).**

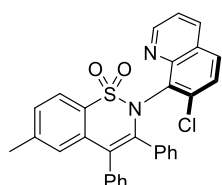

Yield: 60.4 mg (59%). White solid, mp: 242-243 °C. <sup>1</sup>H NMR (600 MHz, CDCl<sub>3</sub>)

δ 9.01 (dd, *J* = 4.2, 1.7 Hz, 1H), 7.96 (dd, *J* = 8.3, 1.7 Hz, 1H), 7.79 (d, *J* = 7.9 Hz, 1H), 7.52 (d, *J* = 8.8 Hz, 1H), 7.42 – 7.02 (m, 11H), 6.78 (t, *J* = 7.3 Hz, 1H), 6.73

(t, *J* = 7.4 Hz, 2H), 2.38 (s, 3H). <sup>13</sup>C NMR (151 MHz, CDCl<sub>3</sub>) δ 151.6, 147.1, 141.9, 140.3, 136.4,

136.3, 135.5, 134.7, 134.4, 132.7, 131.8, 130.9, 130.1, 129.3, 128.4, 128.0, 127.9, 127.8, 127.3, 127.2,

127.1, 126.7, 124.7, 121.6, 121.3, 22.0. HRMS (ESI): *m/z* [M+H]<sup>+</sup> calcd for [C<sub>30</sub>H<sub>21</sub>ClN<sub>2</sub>O<sub>2</sub>S]<sup>+</sup>

requires 509.1085, found 509.1088. [α]<sub>D</sub><sup>25</sup> = -142 (c = 0.1, CH<sub>2</sub>Cl<sub>2</sub>). The product was analyzed by

HPLC to determine the enantiomeric excess: 99% ee (CHIRALPAK OD-H, hexane/*i*-PrOH = 80/20,

detector: 254 nm, T = 25 °C, flow rate: 1 mL/min), *t*<sub>1</sub> (minor) = 9.98 min, *t*<sub>2</sub> (major) = 15.65 min.

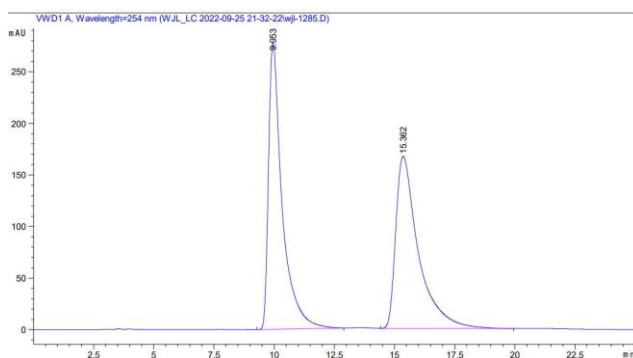

| Peak | RetTime | Area                  | Height    | Area    |
|------|---------|-----------------------|-----------|---------|
| 1    | 9.953   | 1.09365e <sup>4</sup> | 277.82120 | 50.0801 |
| 2    | 15.362  | 1.09015e <sup>4</sup> | 166.86676 | 49.9199 |

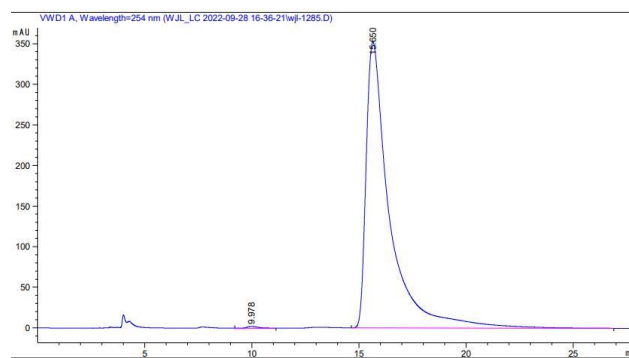

| Peak | RetTime | Area                  | Height    | Area    |
|------|---------|-----------------------|-----------|---------|
| 1    | 9.978   | 111.12524             | 2.42481   | 0.4133  |
| 2    | 15.650  | 2.67744e <sup>4</sup> | 352.13504 | 99.5867 |

**(R)-2-(7-bromoquinolin-8-yl)-6-methyl-3,4-diphenyl-2H-benzo[1,2]thiazine-1,1-dioxide (5xa).**

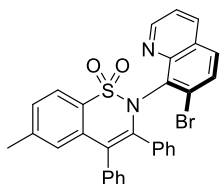

Yield: 25.1 mg (23%). White solid, mp: 209-210 °C.  $^1\text{H NMR}$  (600 MHz,  $\text{CDCl}_3$ )  $\delta$  9.04 (dd,  $J = 4.2, 1.7$  Hz, 1H), 7.97 (dd,  $J = 8.3, 1.7$  Hz, 1H), 7.80 (d,  $J = 7.9$  Hz, 1H), 7.54 – 7.42 (m, 2H), 7.40 – 7.36 (m, 1H), 7.35 – 7.27 (m, 5H), 7.27 – 7.11 (m, 4H), 6.78 (t,  $J = 7.3$  Hz, 1H), 6.72 (t,  $J = 7.6$  Hz, 2H), 2.38 (s, 3H).  $^{13}\text{C NMR}$  (151 MHz,  $\text{CDCl}_3$ )  $\delta$  151.6, 147.5, 141.9, 139.9, 136.4, 135.6, 134.8, 134.7, 134.3, 131.8, 131.1, 130.6, 130.1, 129.5, 128.4, 128.0, 127.9, 127.5, 127.3, 127.1, 126.9, 126.6, 125.0, 121.8, 121.2, 22.0. **HRMS** (ESI):  $m/z$   $[\text{M}+\text{H}]^+$  calcd for  $[\text{C}_{30}\text{H}_{21}\text{BrN}_2\text{O}_2\text{S}]^+$  requires 553.0580, found 553.0586.  $[\alpha]_{\text{D}}^{25} = -113$  ( $c = 0.1$ ,  $\text{CH}_2\text{Cl}_2$ ). The product was analyzed by HPLC to determine the enantiomeric excess: 98% ee (CHIRALPAK OD-H, hexane/*i*-PrOH = 80/20, detector: 254 nm,  $T = 25$  °C, flow rate: 1 mL/min),  $t_1$  (minor) = 10.74 min,  $t_2$  (major) = 16.56 min.

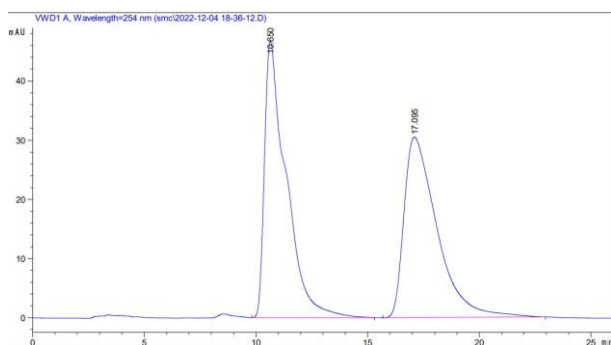

| Peak | RetTime | Area       | Height   | Area    |
|------|---------|------------|----------|---------|
| 1    | 10.650  | 3155.85913 | 46.73004 | 50.1541 |
| 2    | 17.095  | 3136.46313 | 30.54653 | 49.8459 |

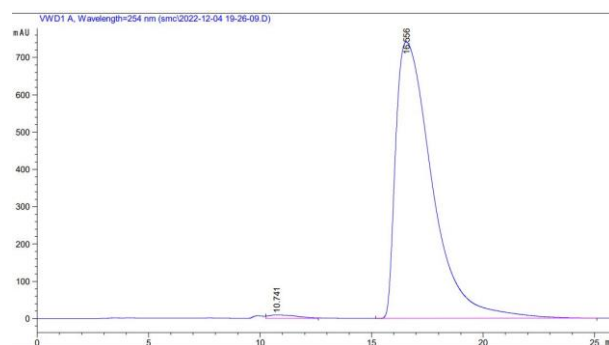

| Peak | RetTime | Area                  | Height    | Area    |
|------|---------|-----------------------|-----------|---------|
| 1    | 10.741  | 869.58191             | 9.63144   | 1.0231  |
| 2    | 16.556  | 8.41229e <sup>4</sup> | 741.08698 | 98.9769 |

**(R)-(E)-6-methyl-3,4-diphenyl-2-(7-styrylquinolin-8-yl)-2H-benzo[1,2]thiazine-1,1-dioxide**

**(5xaa).**

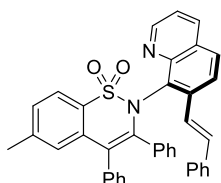

Yield: 22.7 mg (20%). White solid, mp: 248-249 °C.  $^1\text{H NMR}$  (600 MHz,  $\text{CDCl}_3$ )  $\delta$  9.07 (dd,  $J = 4.2, 1.7$  Hz, 1H), 7.96 (dd,  $J = 8.2, 1.7$  Hz, 1H), 7.90 (d,  $J = 7.9$  Hz, 1H), 7.65 – 7.56 (m, 2H), 7.38 (d,  $J = 7.9$  Hz, 1H), 7.35 (dd,  $J = 8.2, 4.2$  Hz, 1H), 7.32 – 7.30 (m, 4H), 7.18 – 7.11 (m, 9H), 7.04 – 6.85 (m, 2H), 6.73 (t,  $J = 7.4$  Hz, 1H), 6.65 (t,  $J = 7.6$  Hz, 2H), 2.49 (s, 3H).  $^{13}\text{C NMR}$  (151 MHz,  $\text{CDCl}_3$ )  $\delta$  151.3, 146.9, 142.3, 141.9, 138.2, 136.9, 136.1, 135.2, 134.5, 134.4, 132.7, 132.5, 131.8, 130.4, 130.0, 128.8, 128.7, 128.6, 128.4, 127.9, 127.8, 127.4, 127.0, 126.9, 126.5, 124.3, 124.0, 123.5, 122.0, 121.3, 22.0. **HRMS** (ESI):  $m/z$   $[\text{M}+\text{H}]^+$  calcd for  $[\text{C}_{38}\text{H}_{28}\text{N}_2\text{O}_2\text{S}]^+$  requires 577.1944, found 577.1956.  $[\alpha]_{\text{D}}^{25} = -120$  ( $c = 0.1$ ,  $\text{CH}_2\text{Cl}_2$ ). The product was analyzed by HPLC to determine the enantiomeric excess: 97% ee (CHIRALPAK OD-H, hexane/*i*-

PrOH = 80/20, detector: 254 nm, T = 25 °C, flow rate: 1 mL/min),  $t_1$  (minor) = 10.92 min,  $t_2$  (major) = 24.46 min.

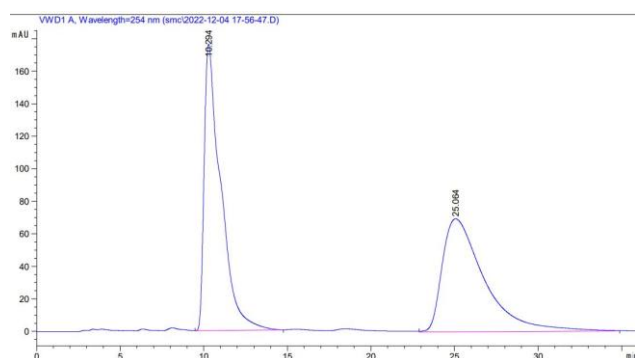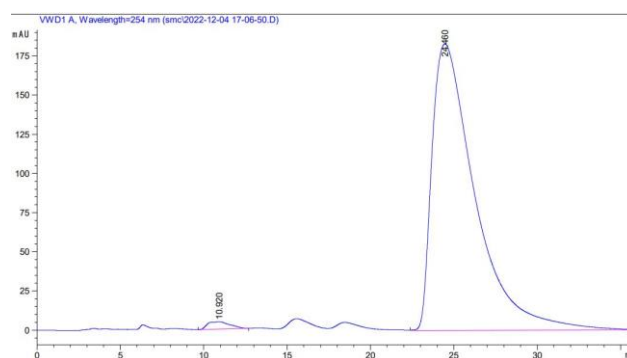

| Peak | RetTime | Area                  | Height    | Area    |
|------|---------|-----------------------|-----------|---------|
| 1    | 10.294  | 1.21686e <sup>4</sup> | 176.10878 | 49.9691 |
| 2    | 25.064  | 1.21836e <sup>4</sup> | 69.55257  | 50.0309 |

| Peak | RetTime | Area                  | Height    | Area    |
|------|---------|-----------------------|-----------|---------|
| 1    | 10.920  | 434.36969             | 4.71320   | 1.3087  |
| 2    | 24.460  | 3.27574e <sup>4</sup> | 182.74223 | 98.6913 |

**(R)-6-methyl-3,4-diphenyl-2-(7-(thiophen-3-yl)quinolin-8-yl)-2H-benzo[1,2]thiazine-1,1-dioxide (5xba).**

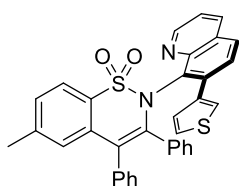

Yield: 32.7 mg (29%). White solid, mp: 202-203 °C. <sup>1</sup>H NMR (600 MHz, CDCl<sub>3</sub>) δ 9.21 (dd,  $J = 4.2, 1.7$  Hz, 1H), 8.05 (d,  $J = 8.3$  Hz, 1H), 7.89 (d,  $J = 7.9$  Hz, 1H), 7.59 (d,  $J = 8.4$  Hz, 1H), 7.44 (dd,  $J = 8.3, 4.2$  Hz, 1H), 7.36 (d,  $J = 7.9$  Hz, 1H), 7.23 (d,  $J = 8.4$  Hz, 1H), 7.19 – 7.07 (m, 4H), 7.04 – 6.90 (m, 5H), 6.79 (dd,  $J = 3.0, 1.3$  Hz, 1H), 6.76 – 6.67 (m, 2H), 6.64 – 6.61 (m, 2H), 2.40 (s, 3H). <sup>13</sup>C NMR (151 MHz, CDCl<sub>3</sub>) δ 151.1, 146.7, 141.7, 139.9, 138.4, 137.3, 136.2, 135.4, 134.6, 134.3, 133.0, 131.7, 130.2, 130.0, 128.7, 128.6, 128.5, 128.1, 127.8, 127.7, 127.6, 127.4, 126.9, 126.3, 124.6, 124.2, 123.9, 121.9, 121.5, 22.0. HRMS (ESI):  $m/z$  [M+H]<sup>+</sup> calcd for [C<sub>34</sub>H<sub>24</sub>N<sub>2</sub>O<sub>2</sub>S<sub>2</sub>]<sup>+</sup> requires 557.1352, found 557.1361.  $[\alpha]_D^{25} = -40$  (c = 0.1, CH<sub>2</sub>Cl<sub>2</sub>). The product was analyzed by HPLC to determine the enantiomeric excess: 97% ee (CHIRALPAK OD-H, hexane/*i*-PrOH = 80/20, detector: 254 nm, T = 25 °C, flow rate: 1 mL/min),  $t_1$  (minor) = 9.00 min,  $t_2$  (major) = 12.04 min.

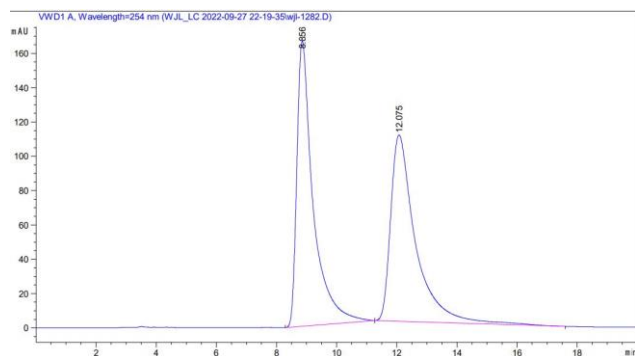

| Peak | RetTime | Area       | Height    | Area    |
|------|---------|------------|-----------|---------|
| 1    | 8.856   | 6252.42236 | 166.20657 | 50.0741 |
| 2    | 12.075  | 6233.91602 | 108.52622 | 49.9259 |

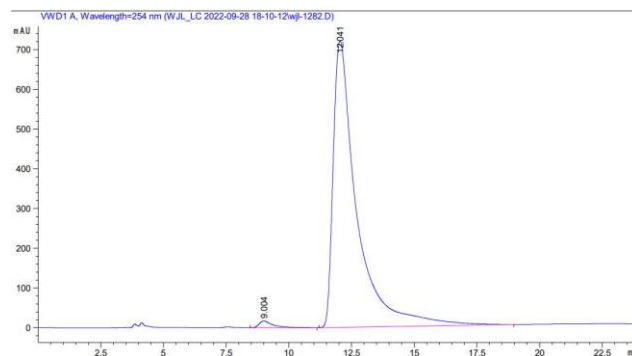

| Peak | RetTime | Area                  | Height    | Area    |
|------|---------|-----------------------|-----------|---------|
| 1    | 9.004   | 655.74805             | 16.94347  | 1.3746  |
| 2    | 12.041  | 4.70475e <sup>4</sup> | 721.12506 | 98.6254 |

**(R)-2-(5-chloro-7-methylquinolin-8-yl)-6-methyl-3,4-diphenyl-2H-benzo[1,2]thiazine-1,1-dioxide (5xca).**

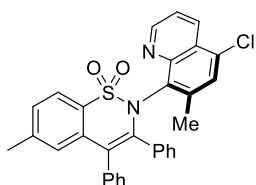

Yield: 96.6 mg (92%). White solid, mp: 224-225 °C. <sup>1</sup>H NMR (600 MHz, CDCl<sub>3</sub>) δ 8.82 (dd, *J* = 4.2, 1.7 Hz, 1H), 8.35 (dd, *J* = 8.5, 1.7 Hz, 1H), 7.77 (d, *J* = 7.9 Hz, 1H), 7.41 – 7.35 (m, 1H), 7.35 – 7.11 (m, 8H), 7.05 (d, *J* = 6.9 Hz, 2H), 6.84 (t, *J* = 7.4 Hz, 1H), 6.76 (t, *J* = 7.6 Hz, 2H), 2.39 (s, 3H), 2.38 (s, 3H). <sup>13</sup>C NMR (151 MHz, CDCl<sub>3</sub>) δ 151.0, 147.0, 141.9, 140.9, 140.7, 136.5, 134.9, 134.8, 132.5, 132.4, 131.7, 131.4, 130.5, 129.7, 129.0, 128.5, 128.0, 127.9, 127.3, 127.0, 126.9, 124.9, 124.4, 121.5, 121.3, 22.0, 19.1. HRMS (ESI): *m/z* [M+H]<sup>+</sup> calcd for [C<sub>31</sub>H<sub>23</sub>ClN<sub>2</sub>O<sub>2</sub>S]<sup>+</sup> requires 523.1242, found 523.1251. [α]<sub>D</sub><sup>25</sup> = -161 (c = 0.1, CH<sub>2</sub>Cl<sub>2</sub>).

The product was analyzed by HPLC to determine the enantiomeric excess: 98% ee (CHIRALPAK AS-H, hexane/*i*-PrOH = 90/10, detector: 254 nm, T = 25 °C, flow rate: 1 mL/min), *t*<sub>1</sub> (minor) = 9.23 min, *t*<sub>2</sub> (major) = 12.47 min.

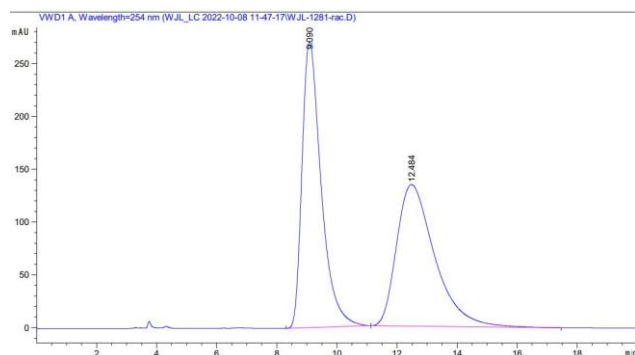

| Peak | RetTime | Area                  | Height    | Area    |
|------|---------|-----------------------|-----------|---------|
| 1    | 9.090   | 1.19807e <sup>4</sup> | 270.86691 | 50.3912 |
| 2    | 12.484  | 1.17947e <sup>4</sup> | 134.07501 | 49.6088 |

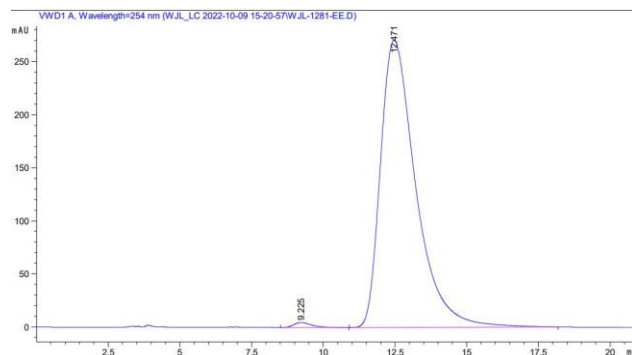

| Peak | RetTime | Area                  | Height    | Area    |
|------|---------|-----------------------|-----------|---------|
| 1    | 9.225   | 199.31787             | 4.64207   | 0.8544  |
| 2    | 12.471  | 2.31280e <sup>4</sup> | 270.53802 | 99.1456 |

**(R)-2-(5-bromo-7-methylquinolin-8-yl)-6-methyl-3,4-diphenyl-2H-benzo[1,2]thiazine-1,1-dioxide (5xda).**

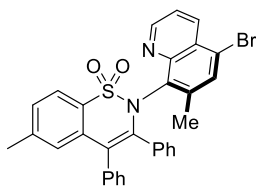

Yield: 102.6 mg (90%). White solid, mp: 222-223 °C. <sup>1</sup>H NMR (600 MHz, CDCl<sub>3</sub>) δ 8.79 (dd, *J* = 4.2, 1.6 Hz, 1H), 8.31 (dd, *J* = 8.5, 1.7 Hz, 1H), 7.76 (d, *J* = 7.9 Hz, 1H), 7.51 (s, 1H), 7.41 – 7.34 (m, 1H), 7.32 – 7.26 (m, 3H), 7.27 – 7.20 (m, 2H), 7.20 – 7.14 (m, 2H), 7.05 (d, *J* = 7.0 Hz, 2H), 6.84 (t, *J* = 7.4 Hz, 1H), 6.77 (t, *J* = 7.6 Hz, 2H), 2.39 (s, 3H), 2.38 (s, 3H). <sup>13</sup>C NMR (151 MHz, CDCl<sub>3</sub>) δ 151.1, 147.0, 141.9, 141.2, 140.8, 136.5, 135.1, 134.9, 134.8, 133.1, 132.7, 131.7, 130.5, 129.7, 128.5, 128.0, 127.9, 127.3, 127.1, 126.9, 126.3, 124.5, 122.2, 121.8, 121.3, 22.0, 19.0. HRMS (ESI): *m/z* [M+H]<sup>+</sup> calcd for [C<sub>31</sub>H<sub>23</sub>BrN<sub>2</sub>O<sub>2</sub>S]<sup>+</sup> requires 567.0736, found 567.0749. [α]<sub>D</sub><sup>25</sup> = -222 (*c* = 0.1, CH<sub>2</sub>Cl<sub>2</sub>). The product was analyzed by HPLC to determine the enantiomeric excess: 98% ee (CHIRALPAK AS-H, hexane/*i*-PrOH = 90/10, detector: 254 nm, T = 25 °C, flow rate: 1 mL/min), *t*<sub>1</sub> (minor) = 9.27 min, *t*<sub>2</sub> (major) = 12.42 min.

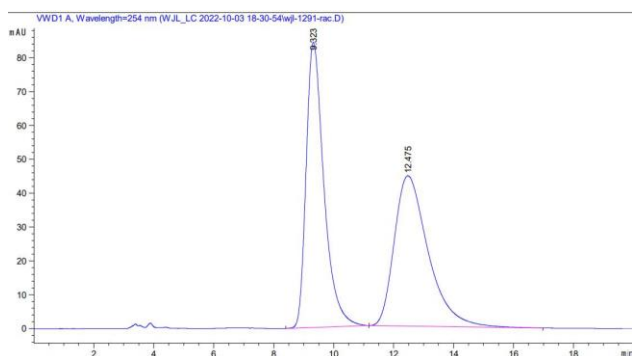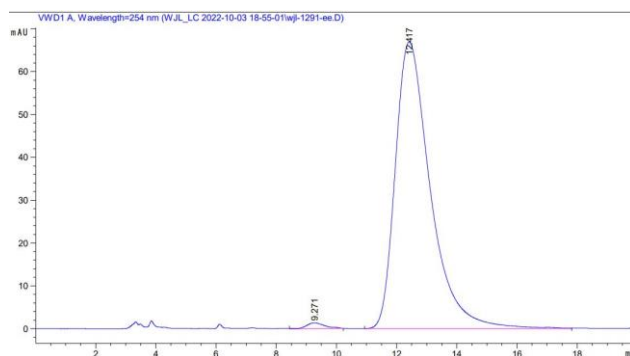

| Peak | RetTime | Area       | Height   | Area    |
|------|---------|------------|----------|---------|
| 1    | 9.323   | 3469.97363 | 84.23627 | 49.8292 |
| 2    | 12.475  | 3493.76855 | 44.43232 | 50.1708 |

| Peak | RetTime | Area       | Height   | Area    |
|------|---------|------------|----------|---------|
| 1    | 9.271   | 58.63945   | 1.35928  | 1.0689  |
| 2    | 12.417  | 5427.38965 | 66.92525 | 98.9311 |

**(R)-2-(5,7-dichloroquinolin-8-yl)-6-methyl-3,4-diphenyl-2H-benzo[1,2]thiazine-1,1-dioxide (5xea).**

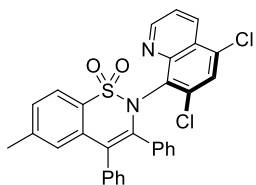

Yield: 97.8 mg (90%). White solid, mp: 206-207 °C. <sup>1</sup>H NMR (600 MHz, CDCl<sub>3</sub>) δ 9.03 (dd, *J* = 4.2, 1.6 Hz, 1H), 8.33 (dd, *J* = 8.5, 1.6 Hz, 1H), 7.77 (d, *J* = 7.9 Hz, 1H), 7.50 – 7.39 (m, 2H), 7.32 (d, *J* = 7.1 Hz, 2H), 7.29 – 7.11 (m, 7H), 6.81 (t, *J* = 7.3 Hz, 1H), 6.76 (t, *J* = 7.5 Hz, 2H), 2.37 (s, 3H). <sup>13</sup>C NMR (151 MHz, CDCl<sub>3</sub>) δ 152.1, 147.2, 142.1, 140.1, 140.0, 136.3, 135.8, 134.7, 134.3, 132.7, 132.4, 132.1, 131.7, 130.9, 130.1, 128.5, 128.2, 128.0, 127.6, 127.4, 127.3, 127.2, 127.1, 126.9, 125.3, 125.0, 122.3, 121.3, 22.0. HRMS

(ESI):  $m/z$   $[M+H]^+$  calcd for  $[C_{30}H_{20}Cl_2N_2O_2S]^+$  requires 543.0695, found 543.0695.  $[\alpha]_D^{25} = -45$  ( $c = 0.1$ ,  $CH_2Cl_2$ ). The product was analyzed by HPLC to determine the enantiomeric excess: 99% ee (CHIRALPAK IC-H, hexane/*i*-PrOH = 80/20, detector: 254 nm,  $T = 25$  °C, flow rate: 1 mL/min),  $t_1$  (major) = 22.08 min,  $t_2$  (minor) = 29.57 min.

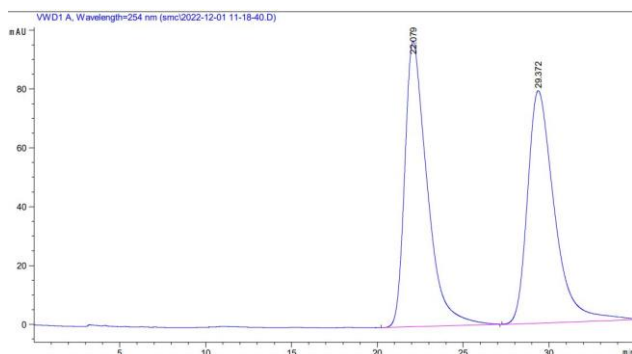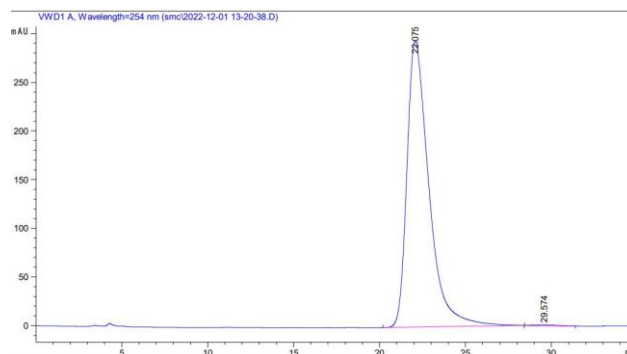

| Peak | RetTime | Area       | Height   | Area    |
|------|---------|------------|----------|---------|
| 1    | 22.079  | 8781.87500 | 96.95437 | 50.5352 |
| 2    | 29.372  | 8595.87793 | 78.99887 | 49.4648 |

| Peak | RetTime | Area                  | Height                 | Area    |
|------|---------|-----------------------|------------------------|---------|
| 1    | 22.075  | 2.60877e <sup>4</sup> | 294.11508              | 99.5886 |
| 2    | 29.574  | 107.76842             | 9.61860e <sup>-1</sup> | 0.4114  |

**(*R*)-2-(5,7-dibromoquinolin-8-yl)-6-methyl-3,4-diphenyl-2*H*-benzo[1,2]thiazine-1,1-dioxide**

**(5xfa).**

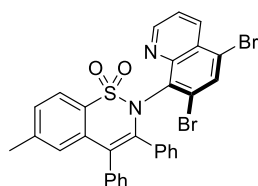

Yield: 116.0 mg (92%). White solid, mp: 194-195 °C. <sup>1</sup>H NMR (600 MHz, CDCl<sub>3</sub>) δ 9.04 (dd,  $J = 4.2, 1.6$  Hz, 1H), 8.34 (dd,  $J = 8.5, 1.6$  Hz, 1H), 7.82 (s, 1H), 7.78 (d,  $J = 7.9$  Hz, 1H), 7.53 – 7.45 (m, 1H), 7.37 – 7.08 (m, 9H), 6.82 (t,  $J = 7.5$  Hz, 1H), 6.76 (t,  $J = 7.5$  Hz, 2H), 2.39 (s, 3H). <sup>13</sup>C NMR (151 MHz, CDCl<sub>3</sub>) δ 152.1, 147.6, 142.0, 139.6, 136.2, 135.4, 134.7, 134.6, 134.1, 133.7, 131.7, 131.1, 130.1, 128.5, 128.2, 127.9, 127.4, 127.2, 127.0, 126.8, 126.4, 125.3, 123.0, 122.8, 121.2, 22.0. HRMS (ESI):  $m/z$   $[M+H]^+$  calcd for  $[C_{30}H_{20}Br_2N_2O_2S]^+$  requires 630.9685, found 630.9695.  $[\alpha]_D^{25} = -110$  ( $c = 0.1$ ,  $CH_2Cl_2$ ). The product was analyzed by HPLC to determine the enantiomeric excess: >99% ee (CHIRALPAK IC-H, hexane/*i*-PrOH = 80/20, detector: 254 nm,  $T = 25$  °C, flow rate: 1 mL/min),  $t_1$  (major) = 20.92 min,  $t_2$  (minor) = 26.60 min.

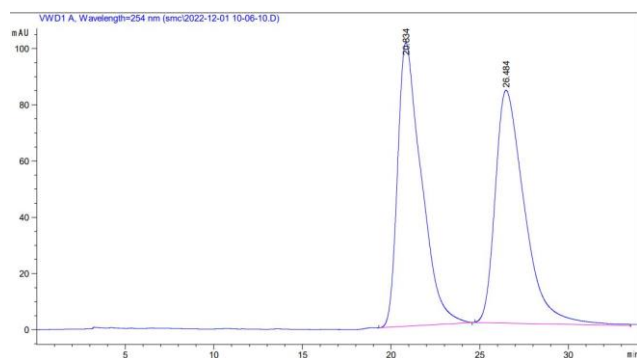

| Peak | RetTime | Area       | Height    | Area    |
|------|---------|------------|-----------|---------|
| 1    | 20.834  | 9372.89648 | 100.90287 | 49.6422 |
| 2    | 26.484  | 9508.00195 | 82.85613  | 50.3578 |

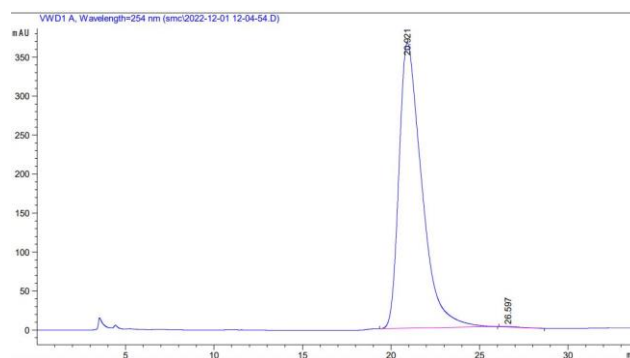

| Peak | RetTime | Area                  | Height                 | Area    |
|------|---------|-----------------------|------------------------|---------|
| 1    | 20.921  | 3.26313e <sup>4</sup> | 366.14182              | 99.8553 |
| 2    | 26.597  | 47.27801              | 7.40868e <sup>-1</sup> | 0.1447  |

**(R)-3,4-bis(4-fluorophenyl)-6-methyl-2-(7-methylquinolin-8-yl)-2H-benzo[1,2]thiazine-1,1-dioxide (5ab).**

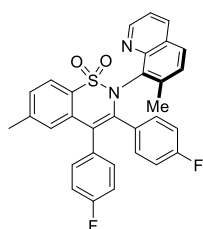

Yield: 90.4 mg (86%). White solid, mp: 250-251 °C. <sup>1</sup>H NMR (600 MHz, CDCl<sub>3</sub>) δ 8.79 (dd, *J* = 4.2, 1.7 Hz, 1H), 7.99 (dd, *J* = 8.2, 1.7 Hz, 1H), 7.79 (d, *J* = 7.9 Hz, 1H), 7.57 (d, *J* = 8.4 Hz, 1H), 7.39 – 7.27 (m, 2H), 7.25 – 7.20 (m, 3H), 7.11 (s, 1H), 7.02 (dd, *J* = 8.5, 5.5 Hz, 2H), 6.95 (t, *J* = 8.6 Hz, 2H), 6.46 (t, *J* = 8.6 Hz, 2H), 2.41

(s, 3H), 2.39 (s, 3H). <sup>13</sup>C NMR (151 MHz, CDCl<sub>3</sub>) δ 162.7 (d, <sup>2</sup>*J*<sub>C-F</sub> = 22.1 Hz), 161.1 (d, <sup>2</sup>*J*<sub>C-F</sub> = 19.9 Hz), 150.6, 146.5, 141.9, 140.5 (d, <sup>3</sup>*J*<sub>C-F</sub> = 7.6 Hz), 134.7, 134.1 (d, <sup>1</sup>*J*<sub>C-F</sub> = 281.7 Hz), 133.3 (d, <sup>3</sup>*J*<sub>C-F</sub> = 7.7 Hz), 132.4 (d, <sup>3</sup>*J*<sub>C-F</sub> = 4.1 Hz), 131.6, 131.5, 130.9 (d, <sup>4</sup>*J*<sub>C-F</sub> = 3.0 Hz), 130.6, 129.2, 128.6, 128.4, 127.1, 127.0, 123.3, 121.4, 120.9, 115.1 (d, <sup>2</sup>*J*<sub>C-F</sub> = 21.0 Hz), 114.0 (d, <sup>2</sup>*J*<sub>C-F</sub> = 22.0 Hz), 22.0, 19.2. <sup>19</sup>F NMR (565 MHz, CDCl<sub>3</sub>) δ -112.6, -114.7. HRMS (ESI): *m/z* [M+H]<sup>+</sup> calcd for [C<sub>31</sub>H<sub>22</sub>F<sub>2</sub>N<sub>2</sub>O<sub>2</sub>S]<sup>+</sup> requires 525.1443, found 525.1443. [α]<sub>D</sub><sup>25</sup> = +17 (c = 0.1, CH<sub>2</sub>Cl<sub>2</sub>). The product was analyzed by HPLC to determine the enantiomeric excess: 99% ee (CHIRALPAK OD-H, hexane/*i*-PrOH = 90/10, detector: 254 nm, T = 25 °C, flow rate: 1 mL/min), *t*<sub>1</sub> (minor) = 10.35 min, *t*<sub>2</sub> (major) = 13.16 min.

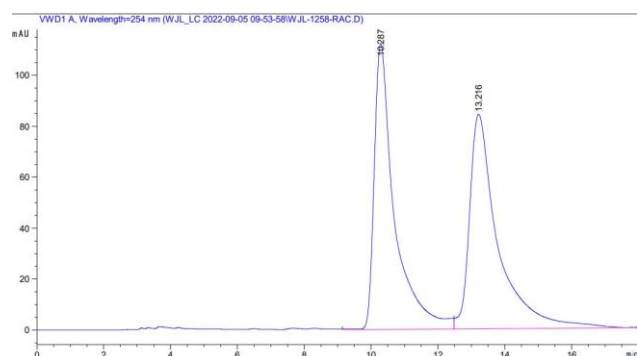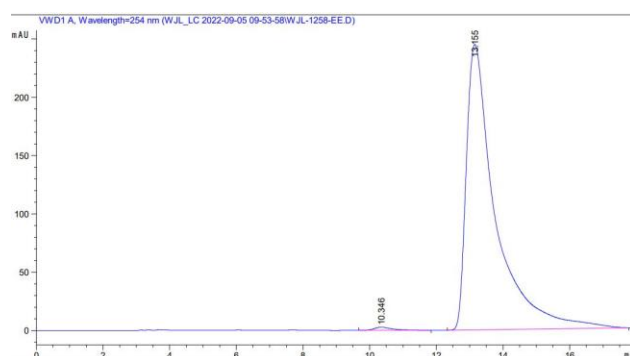



| Peak | RetTime | Area       | Height    | Area    |
|------|---------|------------|-----------|---------|
| 1    | 10.287  | 4722.00781 | 112.26784 | 48.7560 |
| 2    | 13.216  | 4962.97949 | 84.23692  | 51.2440 |

| Peak | RetTime | Area                  | Height    | Area    |
|------|---------|-----------------------|-----------|---------|
| 1    | 10.346  | 104.35126             | 2.72366   | 0.6997  |
| 2    | 13.155  | 1.48087e <sup>4</sup> | 244.66856 | 99.3003 |

**(R)-3,4-bis(4-chlorophenyl)-6-methyl-2-(7-methylquinolin-8-yl)-2H-benzo[1,2]thiazine 1,1-dioxide (5ac).**

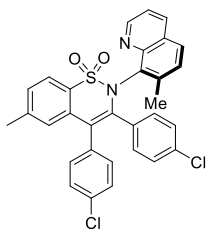

Yield: 42.5 mg (38%). White solid, mp: 251-252 °C. <sup>1</sup>H NMR (600 MHz, CDCl<sub>3</sub>) δ 8.78 (dd, *J* = 4.2, 1.7 Hz, 1H), 8.00 (dd, *J* = 8.2, 1.7 Hz, 1H), 7.78 (d, *J* = 7.9 Hz, 1H), 7.58 (d, *J* = 8.4 Hz, 1H), 7.36 – 7.28 (m, 2H), 7.28 – 7.23 (m, 3H), 7.21 (t, *J* = 6.9 Hz, 2H), 7.09 (s, 1H), 6.99 (d, *J* = 8.3 Hz, 2H), 6.76 (d, *J* = 8.3 Hz, 2H), 2.41 (s, 3H), 2.39 (s, 3H). <sup>13</sup>C NMR (151 MHz, CDCl<sub>3</sub>) δ 150.6, 146.4, 142.0, 140.4, 140.2, 135.5, 134.9, 134.4, 134.0, 133.3, 133.2, 133.0, 132.7, 131.0, 130.5, 129.2, 128.8, 128.5, 128.4, 127.3, 127.0, 123.3, 121.4, 120.9, 22.0, 19.2. HRMS (ESI): *m/z* [M+H]<sup>+</sup> calcd for [C<sub>31</sub>H<sub>22</sub>Cl<sub>2</sub>N<sub>2</sub>O<sub>2</sub>S]<sup>+</sup> requires 557.0852, found 557.0851. [α]<sub>D</sub><sup>25</sup> = -190 (c = 0.1, CH<sub>2</sub>Cl<sub>2</sub>). The product was analyzed by HPLC to determine the enantiomeric excess: 97% ee (CHIRALPAK OD-H, hexane/*i*-PrOH = 95/5, detector: 254 nm, T = 25 °C, flow rate: 1 mL/min), *t*<sub>1</sub> (minor) = 16.37 min, *t*<sub>2</sub> (major) = 21.56 min.

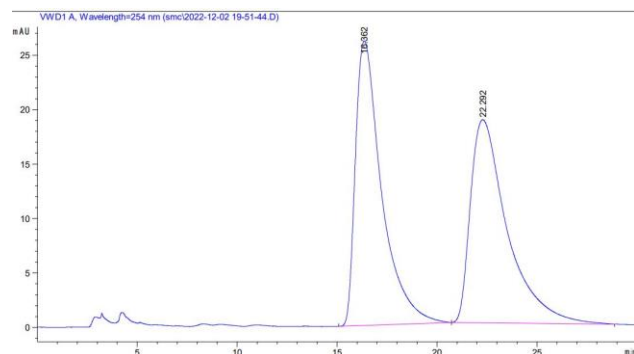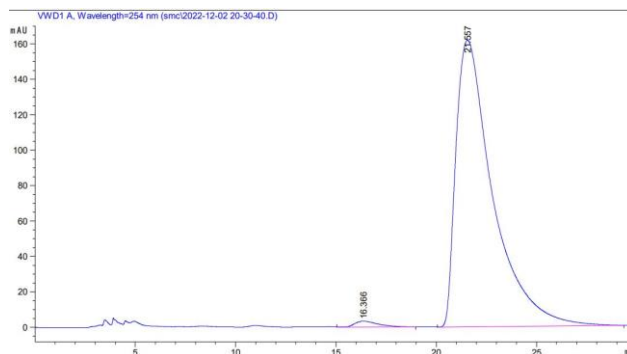

| Peak | RetTime | Area       | Height   | Area    |
|------|---------|------------|----------|---------|
| 1    | 16.362  | 2382.92627 | 26.13785 | 50.0015 |
| 2    | 22.292  | 2382.78540 | 18.65500 | 49.9985 |

| Peak | RetTime | Area                  | Height    | Area    |
|------|---------|-----------------------|-----------|---------|
| 1    | 16.366  | 265.85269             | 3.29085   | 1.2717  |
| 2    | 21.557  | 2.06402e <sup>4</sup> | 161.87393 | 98.7283 |

**(R)-3,4-bis(4-(tert-butyl)phenyl)-6-methyl-2-(7-methylquinolin-8-yl)-2H-benzo[1,2]thiazine-1,1-dioxide (5ad).**

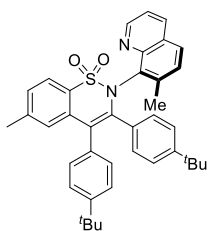

Yield: 97 mg (81%). White solid, mp: 210-211 °C. <sup>1</sup>H NMR (600 MHz, CDCl<sub>3</sub>) δ 8.82 (dd, *J* = 4.2, 1.7 Hz, 1H), 7.95 (dd, *J* = 8.2, 1.7 Hz, 1H), 7.77 (d, *J* = 7.9 Hz, 1H), 7.51 (dd, *J* = 8.5, 2.7 Hz, 1H), 7.33 – 7.25 (m, 3H), 7.21 – 7.10 (m, 5H), 6.92 (dd, *J* = 8.5, 2.0 Hz, 2H), 6.70 – 6.68 (m, 2H), 2.40 (s, 3H), 2.37 (s, 3H), 1.24 (s, 9H).

9H), 0.99 (s, 9H).  $^{13}\text{C}$  NMR (151 MHz,  $\text{CDCl}_3$ )  $\delta$  150.5, 150.4, 149.6, 146.7, 141.6, 141.4, 140.3, 135.2, 135.0, 133.7, 133.3, 132.1, 131.5, 130.5, 129.5, 129.2, 128.1, 128.0, 127.2, 127.0, 124.5, 123.9, 123.3, 121.2, 120.6, 34.4, 34.2, 31.3, 30.9, 22.0, 19.2. HRMS (ESI):  $m/z$   $[\text{M}+\text{H}]^+$  calcd for  $[\text{C}_{39}\text{H}_{40}\text{N}_2\text{O}_2\text{S}]^+$  requires 601.2883, found 601.2897.  $[\alpha]_{\text{D}}^{25} = -101$  ( $c = 0.1$ ,  $\text{CH}_2\text{Cl}_2$ ). The product was analyzed by HPLC to determine the enantiomeric excess: 98% ee (CHIRALPAK AD-H, hexane/*i*-PrOH = 95/5, detector: 254 nm,  $T = 25$  °C, flow rate: 1 mL/min),  $t_1$  (major) = 15.57 min,  $t_2$  (minor) = 18.76 min.

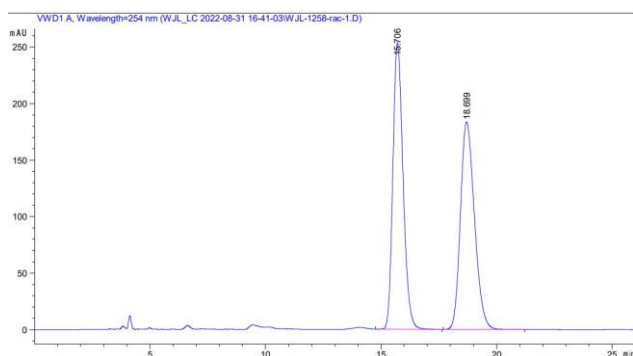

| Peak | RetTime | Area       | Height    | Area    |
|------|---------|------------|-----------|---------|
| 1    | 15.706  | 7762.59619 | 253.57166 | 50.0266 |
| 2    | 18.699  | 7754.35303 | 183.59186 | 49.9734 |

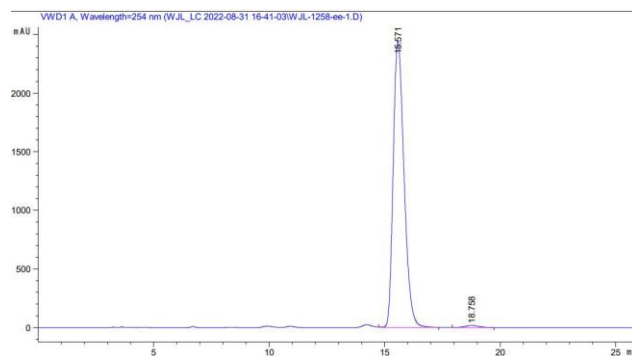

| Peak | RetTime | Area      | Height     | Area    |
|------|---------|-----------|------------|---------|
| 1    | 15.571  | 7.96054e4 | 2442.62280 | 99.0320 |
| 2    | 18.758  | 778.11700 | 17.70855   | 0.9680  |

**(*R*)-3,4-bis(4-methoxyphenyl)-6-methyl-2-(7-methylquinolin-8-yl)-2*H*-benzo[1,2]thiazine-1,1-dioxide (5ae).**

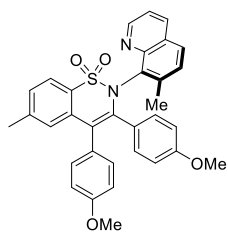

Yield: 98.0 mg (89%). White solid, mp: 155-156 °C.  $^1\text{H}$  NMR (600 MHz,  $\text{CDCl}_3$ )  $\delta$  8.85 (dd,  $J = 4.3, 1.7$  Hz, 1H), 7.96 (dd,  $J = 8.3, 1.7$  Hz, 1H), 7.76 (d,  $J = 7.9$  Hz, 1H), 7.52 (d,  $J = 8.4$  Hz, 1H), 7.39 – 7.25 (m, 2H), 7.22 – 7.15 (m, 4H), 7.04 (d,  $J = 8.7$  Hz, 2H), 6.79 (d,  $J = 8.4$  Hz, 2H), 6.26 (d,  $J = 8.7$  Hz, 2H), 3.76 (s, 3H), 3.51 (s, 3H), 2.39 (s, 3H), 2.33 (s, 3H).  $^{13}\text{C}$  NMR (151 MHz,  $\text{CDCl}_3$ )  $\delta$  158.7, 158.3, 150.5, 146.6, 141.7, 141.1, 140.1, 135.3, 135.2, 133.3, 132.8, 131.2, 130.5, 129.2, 129.0, 128.1, 128.0, 127.6, 127.2, 127.0, 123.3, 121.2, 120.7, 113.4, 112.1, 55.1, 54.8, 22.0, 19.1. HRMS (ESI):  $m/z$   $[\text{M}+\text{H}]^+$  calcd for  $[\text{C}_{33}\text{H}_{28}\text{N}_2\text{O}_4\text{S}]^+$  requires 549.1843, found 549.1850.  $[\alpha]_{\text{D}}^{25} = -138$  ( $c = 0.1$ ,  $\text{CH}_2\text{Cl}_2$ ). The product was analyzed by HPLC to determine the enantiomeric excess: 98% ee (CHIRALPAK OD-H, hexane/*i*-PrOH = 80/20, detector: 254 nm,  $T = 25$  °C, flow rate: 1 mL/min),  $t_1$  (minor) = 11.54 min,  $t_2$  (major) = 15.94 min.

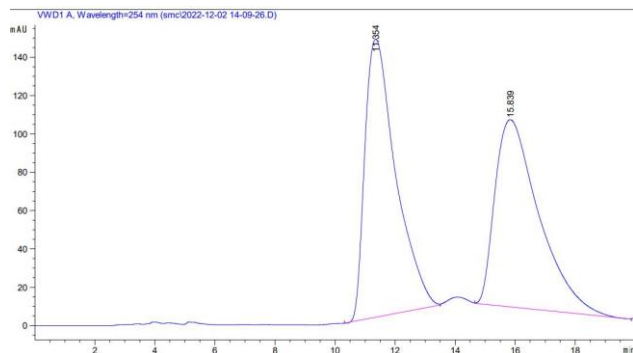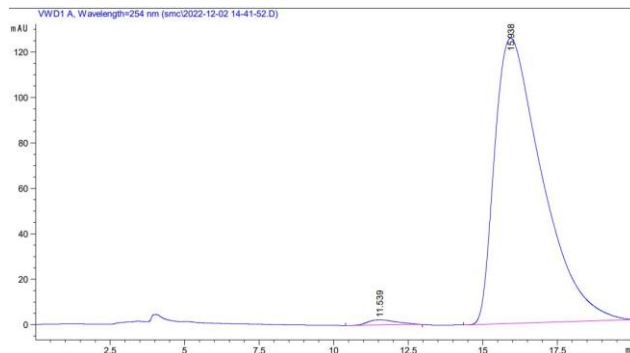

| Peak | RetTime | Area                  | Height    | Area    |
|------|---------|-----------------------|-----------|---------|
| 1    | 11.354  | 1.03713e <sup>4</sup> | 145.08365 | 51.0206 |
| 2    | 15.839  | 9956.33887            | 97.71770  | 48.9794 |

| Peak | RetTime | Area                  | Height    | Area    |
|------|---------|-----------------------|-----------|---------|
| 1    | 11.539  | 155.89290             | 2.30812   | 1.1109  |
| 2    | 15.938  | 1.38775e <sup>4</sup> | 125.59432 | 98.8891 |

**(R)-6-methyl-2-(7-methylquinolin-8-yl)-3,4-bis(4-(trifluoromethyl)phenyl)-2H-benzo[1,2]thiazine-1,1-dioxide (5af).**

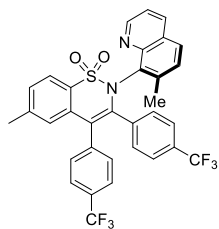

Yield: 107.9 mg (86%). White solid, mp: 258-259 °C. <sup>1</sup>H NMR (600 MHz, CDCl<sub>3</sub>)

δ 8.77 (dd, *J* = 4.2, 1.7 Hz, 1H), 8.00 (dd, *J* = 8.3, 1.7 Hz, 1H), 7.81 (d, *J* = 8.0 Hz, 1H), 7.58 (d, *J* = 8.4 Hz, 1H), 7.53 (d, *J* = 8.0 Hz, 2H), 7.41 (d, *J* = 8.0 Hz, 2H), 7.35 (d, *J* = 7.4 Hz, 1H), 7.30 (dd, *J* = 8.2, 4.2 Hz, 1H), 7.23 (d, *J* = 8.4 Hz, 1H),

7.16 (d, *J* = 8.0 Hz, 2H), 7.05 (d, *J* = 8.2 Hz, 3H), 2.43 (s, 3H), 2.42 (s, 3H). <sup>13</sup>C NMR (151 MHz,

CDCl<sub>3</sub>) δ 150.7, 146.4, 142.3, 140.6, 140.1, 138.1, 135.6, 134.0, 132.4, 132.0, 130.6, 130.0, 129.9 (q,

<sup>2</sup>*J*<sub>C-F</sub> = 33.1 Hz), 129.5, 129.2, 128.7, 127.1, 127.0, 125.1 (q, <sup>4</sup>*J*<sub>C-F</sub> = 272.3, 65.6 Hz), 129.3, 129.2,

128.7, 127.1, 127.0, 125.6 (dd, *J* = 272.3, 65.6 Hz), 125.1 (q, <sup>4</sup>*J*<sub>C-F</sub> = 3.7 Hz), 124.1 (q, <sup>4</sup>*J*<sub>C-F</sub> = 3.7 Hz),

124.0 (q, <sup>1</sup>*J*<sub>C-F</sub> = 272.2 Hz), 123.5 (q, <sup>1</sup>*J*<sub>C-F</sub> = 272.2 Hz), 121.6, 121.3, 22.0, 19.2. <sup>19</sup>F NMR (565 MHz,

CDCl<sub>3</sub>) δ -62.6, -62.9. **HRMS** (ESI): *m/z* [M+H]<sup>+</sup> calcd for [C<sub>33</sub>H<sub>22</sub>F<sub>6</sub>N<sub>2</sub>O<sub>2</sub>S]<sup>+</sup> requires 625.1379,

found 625.1383. [ $\alpha$ ]<sub>D</sub><sup>25</sup> = -113 (c = 0.1, CH<sub>2</sub>Cl<sub>2</sub>). The product was analyzed by HPLC to determine

the enantiomeric excess: 97% ee (CHIRALPAK AD-H, hexane/*i*-PrOH = 80/20, detector: 254 nm, T

= 25 °C, flow rate: 1 mL/min), *t*<sub>1</sub> (major) = 7.13 min, *t*<sub>2</sub> (minor) = 18.17 min.

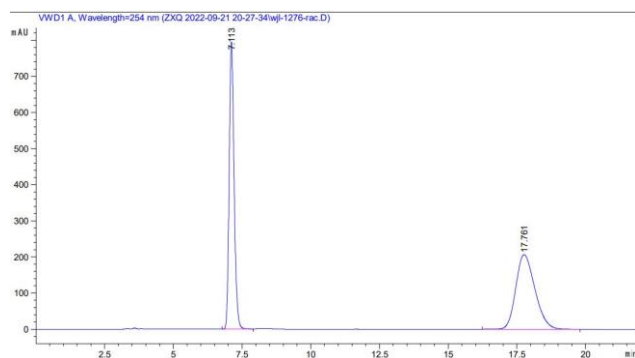

| Peak | RetTime | Area       | Height    | Area    |
|------|---------|------------|-----------|---------|
| 1    | 7.113   | 9895.54688 | 795.08264 | 49.8537 |
| 2    | 17.761  | 9953.63867 | 206.43063 | 50.1463 |

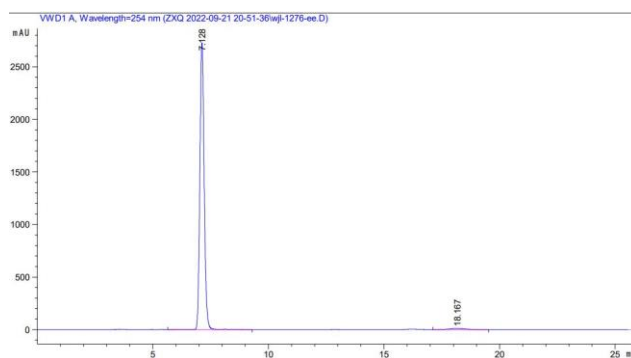

| Peak | RetTime | Area                  | Height     | Area    |
|------|---------|-----------------------|------------|---------|
| 1    | 7.128   | 3.53210e <sup>4</sup> | 2728.90918 | 98.5581 |
| 2    | 18.167  | 516.72943             | 10.36173   | 1.4419  |

**(R)-6-methyl-2-(7-methylquinolin-8-yl)-3,4-di-m-tolyl-2H-benzo[1,2]thiazine-1,1-dioxide (5ag).**

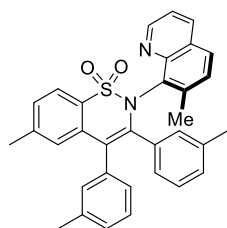

Yield: 84.2 mg (82%). White solid, mp: 226-227 °C. <sup>1</sup>H NMR (600 MHz, CDCl<sub>3</sub>)

δ 8.86 (dd, *J* = 4.2, 1.7 Hz, 1H), 7.95 (dd, *J* = 8.2, 1.7 Hz, 1H), 7.78 (d, *J* = 8.0 Hz, 1H), 7.50 (dd, *J* = 8.4, 1.8 Hz, 1H), 7.34 – 7.24 (m, 2H), 7.21 – 7.06 (m, 6H), 6.98 (d, *J* = 6.5 Hz, 1H), 6.81 – 6.74 (m, 1H), 6.63 – 6.54 (m, 2H), 2.38 (s, 3H), 2.33 (s, 3H), 2.24 (s, 3H), 1.88 (s, 3H). <sup>13</sup>C NMR (151 MHz, CDCl<sub>3</sub>) δ 150.5, 146.7, 141.7, 141.0, 140.2, 137.4, 136.5, 136.1, 135.3, 135.0, 134.7, 133.3, 132.4, 130.7, 129.2, 129.0, 128.5, 128.3, 128.1, 127.7, 127.5, 127.3, 126.9, 126.3, 124.0, 121.2, 120.7, 22.0, 21.4, 20.8, 19.1. HRMS (ESI): *m/z* [M+H]<sup>+</sup>

calcd for [C<sub>33</sub>H<sub>28</sub>N<sub>2</sub>O<sub>2</sub>S]<sup>+</sup> requires 517.1944, found 517.1948. [α]<sub>D</sub><sup>25</sup> = +88 (c = 0.1, CH<sub>2</sub>Cl<sub>2</sub>). The product was analyzed by HPLC to determine the enantiomeric excess: 97% ee (CHIRALPAK OD-H, hexane/*i*-PrOH = 80/20, detector: 254 nm, T = 25 °C, flow rate: 1 mL/min), *t*<sub>1</sub> (minor) = 7.12 min, *t*<sub>2</sub> (major) = 9.23 min.

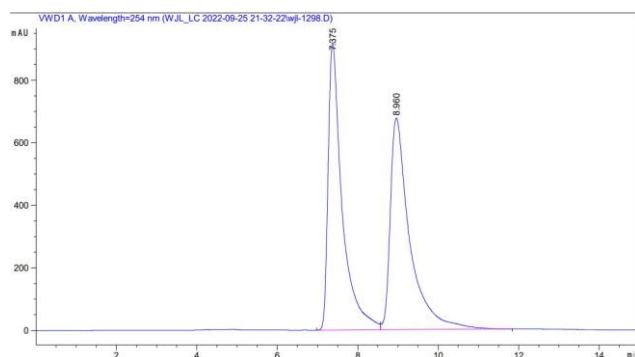

| Peak | RetTime | Area                  | Height    | Area    |
|------|---------|-----------------------|-----------|---------|
| 1    | 7.375   | 2.21491e <sup>4</sup> | 918.50043 | 49.3498 |
| 2    | 8.960   | 2.27327e <sup>4</sup> | 676.34637 | 50.6502 |

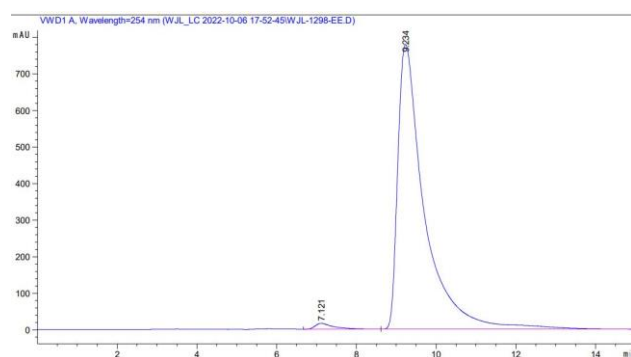

| Peak | RetTime | Area                  | Height    | Area    |
|------|---------|-----------------------|-----------|---------|
| 1    | 7.121   | 512.70258             | 15.95782  | 1.3979  |
| 2    | 9.234   | 3.61649e <sup>4</sup> | 778.70892 | 98.6021 |

**(R)-3,4-bis(3-methoxyphenyl)-6-methyl-2-(7-methylquinolin-8-yl)-2H-benzo[1,2]thiazine-1,1-dioxide (5ah).**

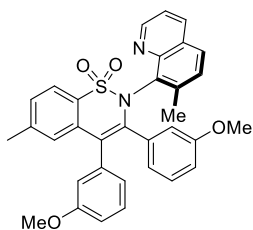

Yield: 102.0 mg (93%). White solid, mp: 197-198 °C.  $^1\text{H NMR}$  (600 MHz,  $\text{CDCl}_3$ )  $\delta$  8.83 (d,  $J = 2.6$  Hz, 1H), 7.96 (d,  $J = 8.3$  Hz, 1H), 7.78 (d,  $J = 7.9$  Hz, 1H), 7.52 (d,  $J = 8.4$  Hz, 1H), 7.32 – 7.22 (m, 3H), 7.21 – 7.14 (m, 2H), 6.95 (d,  $J = 7.6$  Hz, 1H), 6.80 (s, 1H), 6.75 – 6.56 (m, 4H), 6.37 (dd,  $J = 8.1, 2.6$  Hz, 1H), 3.67 (s, 3H), 3.35 (s, 3H), 2.39 (s, 3H), 2.36 (s, 3H).  $^{13}\text{C NMR}$  (151 MHz,  $\text{CDCl}_3$ )  $\delta$  159.2, 158.0, 150.5, 146.7, 141.8, 140.8, 140.3, 138.0, 136.1, 135.4, 134.7, 133.2, 130.5, 129.3, 128.7, 128.5, 128.2, 127.7, 127.3, 127.0, 124.4, 123.8, 122.6, 121.3, 120.8, 117.1, 114.9, 114.4, 112.9, 55.2, 55.0, 22.0, 19.2. **HRMS** (ESI):  $m/z$   $[\text{M}+\text{H}]^+$  calcd for  $[\text{C}_{33}\text{H}_{28}\text{N}_2\text{O}_4\text{S}]^+$  requires 549.1843, found 549.1852.  $[\alpha]_{\text{D}}^{25} = -180$  ( $c = 0.1$ ,  $\text{CH}_2\text{Cl}_2$ ). The product was analyzed by HPLC to determine the enantiomeric excess: 97% ee (CHIRALPAK OD-H, hexane/*i*-PrOH = 80/20, detector: 254 nm,  $T = 25$  °C, flow rate: 1 mL/min),  $t_1$  (minor) = 9.42 min,  $t_2$  (major) = 13.17 min.

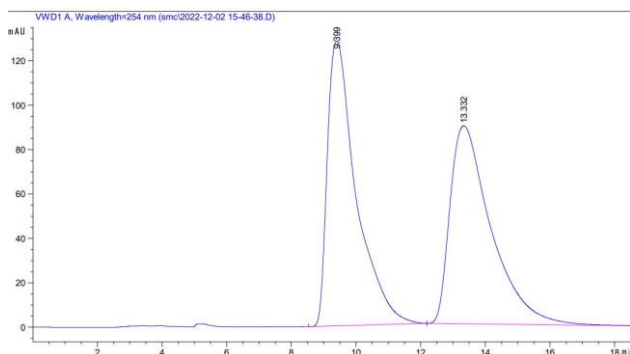

| Peak | RetTime | Area       | Height    | Area    |
|------|---------|------------|-----------|---------|
| 1    | 9.399   | 7933.53076 | 128.35252 | 50.1175 |
| 2    | 13.332  | 7896.33984 | 89.25243  | 49.8825 |

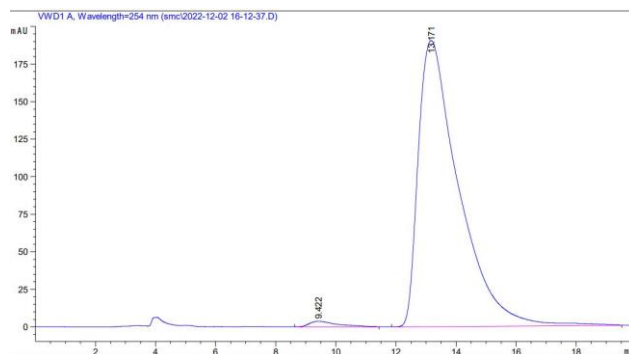

| Peak | RetTime | Area      | Height    | Area    |
|------|---------|-----------|-----------|---------|
| 1    | 9.422   | 248.65074 | 3.69090   | 1.3717  |
| 2    | 13.171  | 1.78783e4 | 190.54797 | 98.6283 |

**(R)-3,4-bis(3-chlorophenyl)-6-methyl-2-(7-methylquinolin-8-yl)-2H-benzo[1,2]thiazine-1,1-dioxide (5ai).**

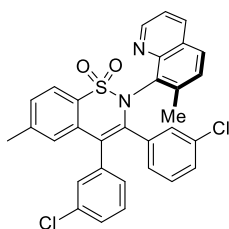

Yield: 74.4 mg (67%). White solid, mp: 220-221 °C.  $^1\text{H NMR}$  (600 MHz,  $\text{CDCl}_3$ )  $\delta$  8.79 (dd,  $J = 4.2, 1.7$  Hz, 1H), 7.96 (dd,  $J = 8.2, 1.7$  Hz, 1H), 7.78 (d,  $J = 7.9$  Hz, 1H), 7.55 (d,  $J = 8.4$  Hz, 1H), 7.32 (d,  $J = 6.0$  Hz, 2H), 7.30 – 7.26 (m, 1H), 7.23 – 7.15 (m, 5H), 7.10 (s, 1H), 6.87 (d,  $J = 7.7$  Hz, 1H), 6.83 – 6.79 (m, 1H), 6.69 (t,  $J = 7.9$  Hz, 1H), 2.41 (s, 3H), 2.40 (s, 3H).  $^{13}\text{C NMR}$  (151 MHz,  $\text{CDCl}_3$ )  $\delta$  150.7, 146.4, 142.1, 140.5,

140.1, 138.1, 136.2, 135.5, 134.2, 133.9, 132.9, 132.6, 131.6, 130.6, 129.9, 129.8, 129.4, 129.2, 128.9, 128.6, 128.3, 128.2, 127.9, 127.7, 127.1, 127.0, 123.3, 121.4, 121.0, 22.0, 19.2. **HRMS** (ESI):  $m/z$   $[M+H]^+$  calcd for  $[C_{31}H_{22}Cl_2N_2O_2S]^+$  requires 557.0852, found 557.0853.  $[\alpha]_D^{25} = +53$  ( $c = 0.1$ ,  $CH_2Cl_2$ ). The product was analyzed by HPLC to determine the enantiomeric excess: 95% ee (CHIRALPAK OD-H, hexane/*i*-PrOH = 90/10, detector: 254 nm,  $T = 25$  °C, flow rate: 1 mL/min),  $t_1$  (minor) = 12.19 min,  $t_2$  (major) = 15.19 min.

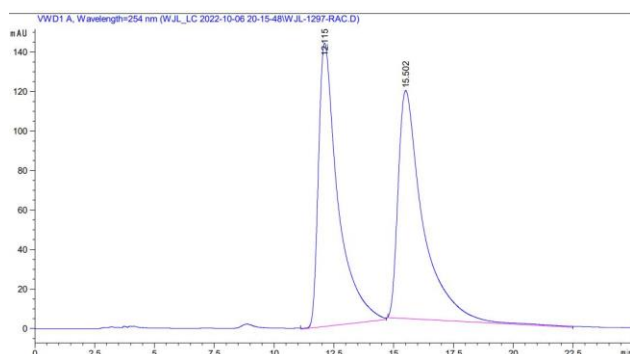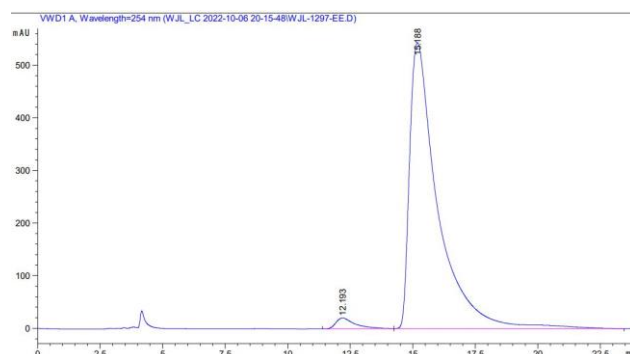

| Peak | RetTime | Area       | Height    | Area    |
|------|---------|------------|-----------|---------|
| 1    | 12.115  | 8137.08789 | 143.51866 | 49.4716 |
| 2    | 15.502  | 8310.92383 | 115.44869 | 50.5284 |

| Peak | RetTime | Area       | Height    | Area    |
|------|---------|------------|-----------|---------|
| 1    | 12.193  | 1087.71130 | 20.60661  | 2.4963  |
| 2    | 15.188  | 4.24845e4  | 543.19104 | 97.5037 |

**(R)-3,4-dibutyl-6-methyl-2-(7-methylquinolin-8-yl)-2H-benzo[1,2]thiazine-1,1-dioxide (5aj).**

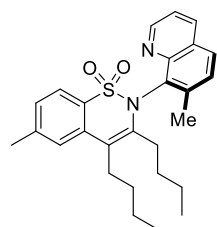

Yield: 72.8 mg (81%). White solid, mp: 198-199 °C.  $^1H$  NMR (600 MHz,  $CDCl_3$ )  $\delta$  8.82 (dd,  $J = 4.1, 1.8$  Hz, 1H), 8.07 (dd,  $J = 8.3, 1.8$  Hz, 1H), 7.71 (d,  $J = 8.4$  Hz, 1H), 7.66 (d,  $J = 7.9$  Hz, 1H), 7.44 (s, 1H), 7.36 (d,  $J = 8.4$  Hz, 1H), 7.33 – 7.29 (m, 1H), 7.22 (d,  $J = 9.5$  Hz, 1H), 2.79 – 2.61 (m, 2H), 2.50 (s, 3H), 2.18 – 2.10 (m, 4H), 2.04 – 1.89 (m, 1H), 1.68 – 1.61 (m, 3H), 1.52 – 1.44 (m, 2H), 1.42 – 1.34 (m, 1H), 1.12 – 0.98 (m, 2H), 0.97 (t,  $J = 7.3$  Hz, 3H), 0.58 (t,  $J = 7.3$  Hz, 3H).  $^{13}C$  NMR (151 MHz,  $CDCl_3$ )  $\delta$  150.9, 147.1, 141.4, 140.5, 139.9, 135.4, 134.7, 133.1, 131.9, 129.4, 128.3, 127.6, 127.3, 124.7, 121.3, 120.9, 120.5, 32.2, 30.7, 30.5, 28.2, 23.0, 22.6, 22.1, 18.6, 14.0, 13.4. **HRMS** (ESI):  $m/z$   $[M+H]^+$  calcd for  $[C_{27}H_{32}N_2O_2S]^+$  requires 449.2257, found 449.2266.  $[\alpha]_D^{25} = -282$  ( $c = 0.1$ ,  $CH_2Cl_2$ ). The product was analyzed by HPLC to determine the enantiomeric excess: 98% ee (CHIRALPAK OD-H, hexane/*i*-PrOH = 90/10, detector: 254 nm,  $T = 25$  °C, flow rate: 1 mL/min),  $t_1$  (minor) = 8.63 min,  $t_2$  (major) = 12.72 min.

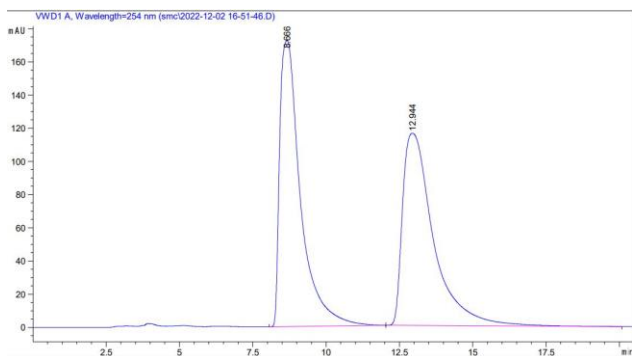

| Peak | RetTime | Area       | Height    | Area    |
|------|---------|------------|-----------|---------|
| 1    | 8.666   | 8492.09375 | 172.39214 | 49.9804 |
| 2    | 12.944  | 8498.75488 | 115.91394 | 50.0196 |

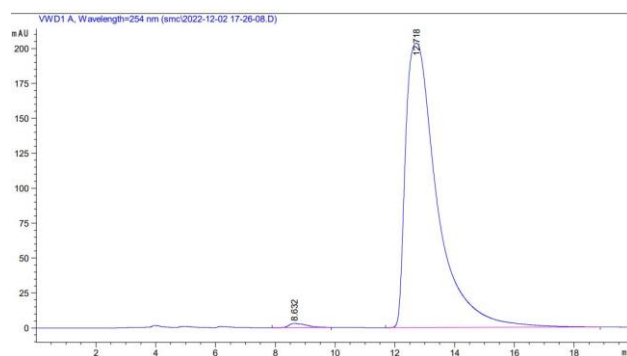

| Peak | RetTime | Area                  | Height    | Area    |
|------|---------|-----------------------|-----------|---------|
| 1    | 8.632   | 124.42561             | 3.06659   | 0.8266  |
| 2    | 12.718  | 1.49281e <sup>4</sup> | 203.73566 | 99.1734 |

**(R)-6-methyl-2-(7-methylquinolin-8-yl)-3-phenyl-2H-benzo[1,2]thiazine-1,1-dioxide (5ak).**

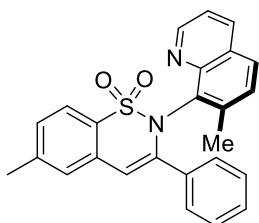

Yield: 61.7 mg (75%). White solid, mp: 241-242 °C. <sup>1</sup>H NMR (600 MHz, CDCl<sub>3</sub>) δ 9.00 (dd, *J* = 4.2, 1.7 Hz, 1H), 7.99 (dd, *J* = 8.3, 1.8 Hz, 1H), 7.71 (d, *J* = 8.0 Hz, 1H), 7.60 (d, *J* = 7.0 Hz, 2H), 7.53 (d, *J* = 8.4 Hz, 1H), 7.38 (s, 1H), 7.36 – 7.31 (m, 1H), 7.27 (d, *J* = 8.1 Hz, 1H), 7.14 (d, *J* = 8.3 Hz, 1H), 7.11 (t, *J* = 7.3 Hz, 1H), 7.04 (t, *J* = 7.6 Hz, 2H), 6.73 (s, 1H), 2.49 (s, 3H), 2.16 (s, 3H). <sup>13</sup>C NMR (151 MHz, CDCl<sub>3</sub>) δ 150.9, 146.8, 144.7, 142.2, 139.6, 135.8, 135.4, 133.7, 133.5, 130.3, 129.4, 129.2, 128.5, 128.3, 127.9, 127.8, 127.4, 127.0, 121.5, 120.9, 111.2, 21.7, 18.8. HRMS (ESI): *m/z* [M+H]<sup>+</sup> calcd for [C<sub>25</sub>H<sub>20</sub>N<sub>2</sub>O<sub>2</sub>S]<sup>+</sup> requires 413.1318, found 413.1328. [α]<sub>D</sub><sup>25</sup> = +119 (c = 0.1, CH<sub>2</sub>Cl<sub>2</sub>). The product was analyzed by HPLC to determine the enantiomeric excess: 99% ee (CHIRALPAK IB-H, hexane/*i*-PrOH = 80/20, detector: 254 nm, T = 25 °C, flow rate: 1 mL/min), *t*<sub>1</sub> (minor) = 27.54 min, *t*<sub>2</sub> (major) = 32.52 min.

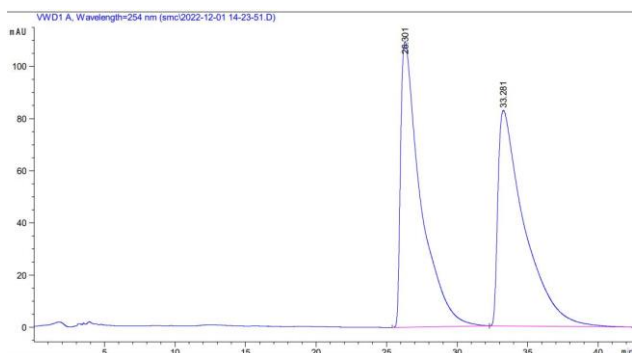

| Peak | RetTime | Area                  | Height    | Area    |
|------|---------|-----------------------|-----------|---------|
| 1    | 26.301  | 1.07853e <sup>4</sup> | 109.58272 | 50.0718 |
| 2    | 33.281  | 1.07544e <sup>4</sup> | 82.68362  | 49.9282 |

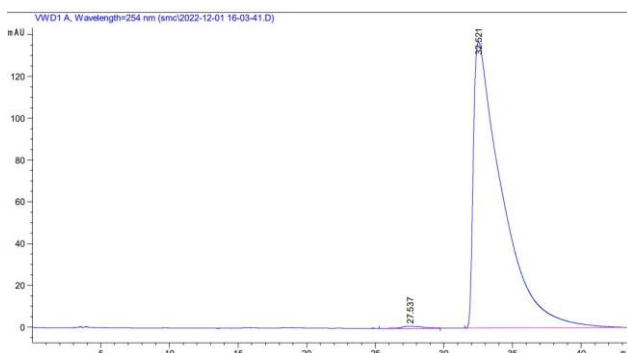

| Peak | RetTime | Area                  | Height    | Area    |
|------|---------|-----------------------|-----------|---------|
| 1    | 27.537  | 141.74036             | 1.17679   | 0.7093  |
| 2    | 32.521  | 1.98418e <sup>4</sup> | 137.00093 | 99.2907 |

**(R)-3-(4-fluorophenyl)-6-methyl-2-(7-methylquinolin-8-yl)-2H-benzo[1,2]thiazine-1,1-dioxide**

**(5al).**

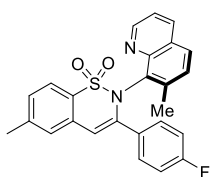

Yield: 81.0 mg (94%). White solid, mp: 234-235 °C.  $^1\text{H NMR}$  (600 MHz,  $\text{CDCl}_3$ )  $\delta$  8.99 (dd,  $J = 4.2, 1.7$  Hz, 1H), 8.01 (dd,  $J = 8.3, 1.7$  Hz, 1H), 7.71 (d,  $J = 8.0$  Hz, 1H), 7.65 – 7.47 (m, 3H), 7.42 – 7.33 (m, 2H), 7.28 (d,  $J = 8.0$  Hz, 1H), 7.17 (d,  $J = 8.4$  Hz, 1H), 6.73 (t,  $J = 8.7$  Hz, 2H), 6.68 (s, 1H), 2.49 (s, 3H), 2.14 (s, 3H).  $^{13}\text{C NMR}$  (151 MHz,  $\text{CDCl}_3$ )  $\delta$  163.2 (d,  $^1J_{\text{C-F}} = 249.7$  Hz), 151.0, 146.7, 143.5, 142.3, 139.6, 135.5, 133.5, 133.3, 131.9 (d,  $^4J_{\text{C-F}} = 3.2$  Hz), 130.3, 129.7 (d,  $^3J_{\text{C-F}} = 8.9$  Hz), 129.4, 128.6, 128.4, 127.4, 127.1, 121.5, 121.0, 115.0 (d,  $^2J_{\text{C-F}} = 20.8$  Hz), 110.4, 21.7, 18.7.  $^{19}\text{F NMR}$  (565 MHz,  $\text{CDCl}_3$ )  $\delta$  -111.6. **HRMS** (ESI):  $m/z$   $[\text{M}+\text{H}]^+$  calcd for  $[\text{C}_{25}\text{H}_{19}\text{FN}_2\text{O}_2\text{S}]^+$  requires 431.1224, found 431.1228.  $[\alpha]_{\text{D}}^{25} = -120$  ( $c = 0.1$ ,  $\text{CH}_2\text{Cl}_2$ ). The product was analyzed by HPLC to determine the enantiomeric excess: 98% ee (CHIRALPAK OD-H, hexane/*i*-PrOH = 80/20, detector: 254 nm,  $T = 25$  °C, flow rate: 1 mL/min),  $t_1$  (minor) = 14.68 min,  $t_2$  (major) = 21.88 min.

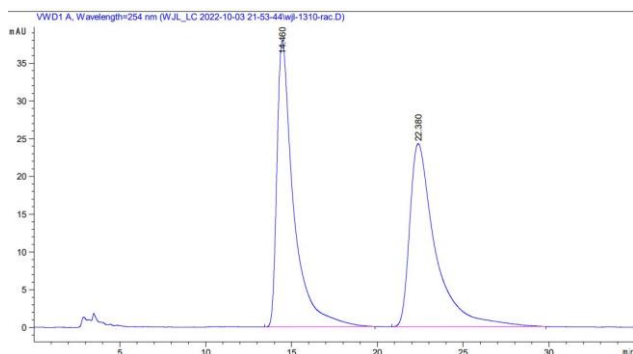

| Peak | RetTime | Area       | Height   | Area    |
|------|---------|------------|----------|---------|
| 1    | 14.460  | 2555.48071 | 37.84724 | 50.4238 |
| 2    | 22.380  | 2512.52734 | 24.24912 | 49.5762 |

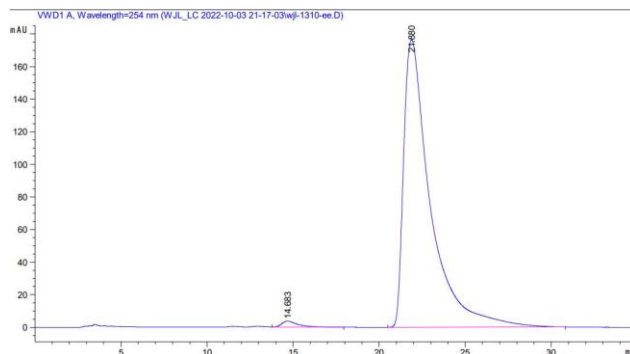

| Peak | RetTime | Area                  | Height    | Area    |
|------|---------|-----------------------|-----------|---------|
| 1    | 14.683  | 233.37505             | 3.62806   | 1.2145  |
| 2    | 21.880  | 1.89825e <sup>4</sup> | 176.62465 | 98.7855 |

**(R)-3-(4-chlorophenyl)-6-methyl-2-(7-methylquinolin-8-yl)-2H-benzo[1,2]thiazine-1,1-dioxide**

**(5am).**

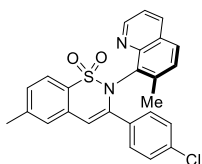

Yield: 82.2 mg (92%). White solid, mp: 246-247 °C.  $^1\text{H NMR}$  (600 MHz,  $\text{CDCl}_3$ )  $\delta$  8.98 (dd,  $J = 4.2, 1.7$  Hz, 1H), 8.00 (dd,  $J = 8.2, 1.7$  Hz, 1H), 7.70 (d,  $J = 7.9$  Hz, 1H), 7.62 – 7.49 (m, 3H), 7.36 (s, 1H), 7.34 – 7.31 (m, 1H), 7.27 (d,  $J = 8.0$  Hz, 1H), 7.15 (d,  $J = 8.4$  Hz, 1H), 7.01 (d,  $J = 8.6$  Hz, 2H), 6.70 (s, 1H), 2.48 (s, 3H), 2.13 (s, 3H).  $^{13}\text{C NMR}$  (151 MHz,  $\text{CDCl}_3$ )  $\delta$  151.0, 146.7, 143.4, 142.4, 139.6, 135.6, 135.2, 134.3, 133.4, 133.3, 130.4, 129.5,



129.1, 128.8, 128.5, 128.3, 127.5, 127.4, 127.1, 121.5, 121.0, 111.5, 111.4, 21.7, 18.7. **HRMS** (ESI):  $m/z$   $[M+H]^+$  calcd for  $[C_{25}H_{19}ClN_2O_2S]^+$  requires 447.0929, found 447.0930.  $[\alpha]_D^{25} = -103$  ( $c = 0.1$ ,  $CH_2Cl_2$ ). The product was analyzed by HPLC to determine the enantiomeric excess: 98% ee (CHIRALPAK OD-H, hexane/*i*-PrOH = 80/20, detector: 254 nm,  $T = 25$  °C, flow rate: 1 mL/min),  $t_1$  (minor) = 15.08 min,  $t_2$  (major) = 20.75 min.

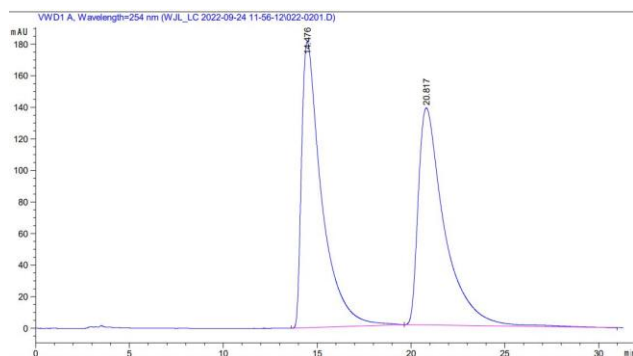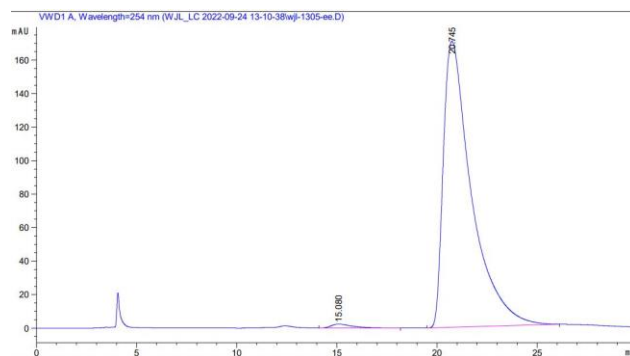

| Peak | RetTime | Area                  | Height    | Area    |
|------|---------|-----------------------|-----------|---------|
| 1    | 14.476  | 1.34789e <sup>4</sup> | 181.34236 | 50.2574 |
| 2    | 20.817  | 1.33409e <sup>4</sup> | 137.50198 | 49.7426 |

| Peak | RetTime | Area                  | Height    | Area    |
|------|---------|-----------------------|-----------|---------|
| 1    | 15.080  | 176.67310             | 2.37675   | 1.0485  |
| 2    | 20.745  | 1.66729e <sup>4</sup> | 170.74089 | 98.9515 |

**(R)-6-methyl-2-(7-methylquinolin-8-yl)-3-(p-tolyl)-2H-benzo[1,2]thiazine-1,1-dioxide (5an).**

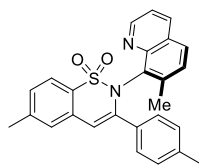

Yield: 74.5 mg (87%). White solid, mp: 260-261 °C. **<sup>1</sup>H NMR** (600 MHz,  $CDCl_3$ )  $\delta$  9.01 (dd,  $J = 4.2, 1.7$  Hz, 1H), 7.99 (dd,  $J = 8.2, 1.8$  Hz, 1H), 7.70 (d,  $J = 7.9$  Hz, 1H), 7.54 (d,  $J = 8.4$  Hz, 1H), 7.49 (d,  $J = 8.2$  Hz, 2H), 7.36 (s, 1H), 7.35 – 7.32 (m, 1H), 7.29 – 7.22 (m, 1H), 7.14 (d,  $J = 8.4$  Hz, 1H), 6.85 (d,  $J = 8.0$  Hz, 2H), 6.70 (s, 1H), 2.49 (s, 3H), 2.15 (s, 3H), 2.13 (s, 3H). **<sup>13</sup>C NMR** (151 MHz,  $CDCl_3$ )  $\delta$  150.9, 146.9, 144.7, 142.2, 139.5, 139.2, 135.4, 133.8, 133.6, 133.0, 130.3, 129.5, 128.7, 128.3, 128.2, 127.8, 127.3, 127.0, 121.5, 120.9, 110.6, 21.7, 21.1, 18.7. **HRMS** (ESI):  $m/z$   $[M+H]^+$  calcd for  $[C_{26}H_{22}N_2O_2S]^+$  requires 427.1475, found 427.1479.  $[\alpha]_D^{25} = +92$  ( $c = 0.1$ ,  $CH_2Cl_2$ ). The product was analyzed by HPLC to determine the enantiomeric excess: 99% ee (CHIRALPAK OD-H, hexane/*i*-PrOH = 80/20, detector: 254 nm,  $T = 25$  °C, flow rate: 1 mL/min),  $t_1$  (minor) = 16.51 min,  $t_2$  (major) = 23.35 min.

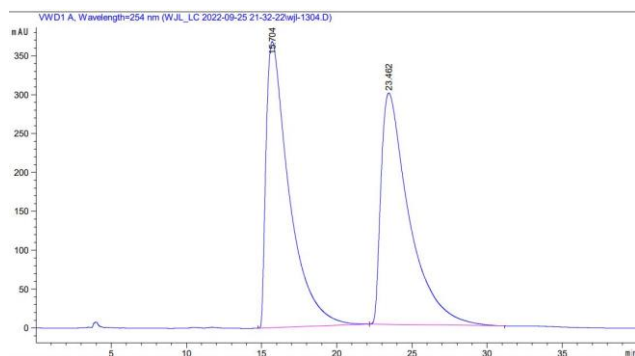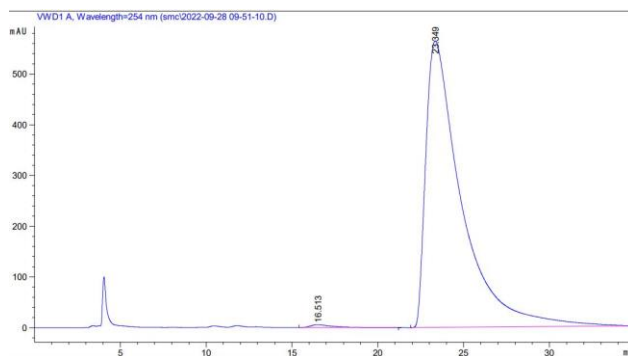

| Peak | RetTime | Area                  | Height    | Area    |
|------|---------|-----------------------|-----------|---------|
| 1    | 15.704  | 3.92003e <sup>4</sup> | 367.87833 | 50.4109 |
| 2    | 23.462  | 3.85613e <sup>4</sup> | 297.40997 | 49.5891 |

| Peak | RetTime | Area                  | Height    | Area    |
|------|---------|-----------------------|-----------|---------|
| 1    | 16.513  | 501.75006             | 5.40673   | 0.6111  |
| 2    | 23.349  | 8.15991e <sup>4</sup> | 564.82068 | 99.3889 |

**(R)-3-(4-(tert-butyl)phenyl)-6-methyl-2-(7-methylquinolin-8-yl)-2H-benzo[1,2]thiazine-1,1-dioxide (5ao).**

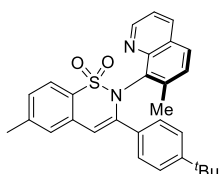

Yield: 87.1 mg (93%). White solid, mp: 228-229 °C. <sup>1</sup>H NMR (600 MHz, CDCl<sub>3</sub>)

δ 9.01 (dd, *J* = 4.2, 1.7 Hz, 1H), 8.00 (dd, *J* = 8.2, 1.7 Hz, 1H), 7.69 (d, *J* = 7.9 Hz, 1H), 7.54 (dd, *J* = 8.4, 6.3 Hz, 3H), 7.47 – 7.30 (m, 2H), 7.25 (d, *J* = 7.0 Hz, 1H),

7.15 (d, *J* = 8.4 Hz, 1H), 7.06 (d, *J* = 8.5 Hz, 2H), 6.71 (s, 1H), 2.49 (s, 3H), 2.15 (s, 3H), 1.15 (s, 9H).

<sup>13</sup>C NMR (151 MHz, CDCl<sub>3</sub>) δ 152.3, 150.9, 147.0, 144.7, 142.1, 139.6, 135.4, 133.9, 133.7, 132.9, 130.3, 129.5, 128.3, 128.1, 127.5, 127.3, 127.1, 124.9, 121.5, 120.9, 110.8, 34.5, 31.1, 21.7, 18.8.

**HRMS** (ESI): *m/z* [M+H]<sup>+</sup> calcd for [C<sub>29</sub>H<sub>28</sub>N<sub>2</sub>O<sub>2</sub>S]<sup>+</sup> requires 469.1944, found 469.1948. [α]<sub>D</sub><sup>25</sup> = -181 (*c* = 0.1, CH<sub>2</sub>Cl<sub>2</sub>). The product was analyzed by HPLC to determine the enantiomeric excess: 98% ee (CHIRALPAK OD-H, hexane/*i*-PrOH = 80/20, detector: 254 nm, T = 25 °C, flow rate: 1 mL/min), *t*<sub>1</sub> (minor) = 12.45 min, *t*<sub>2</sub> (major) = 20.32 min.

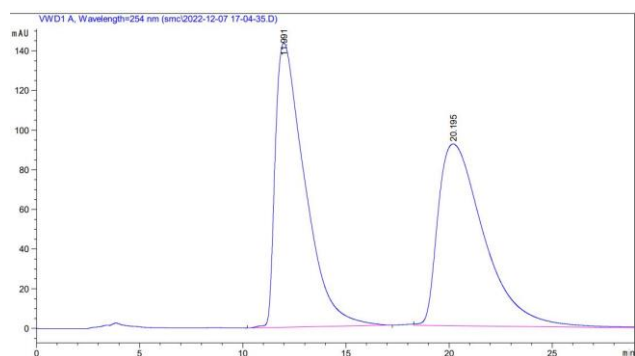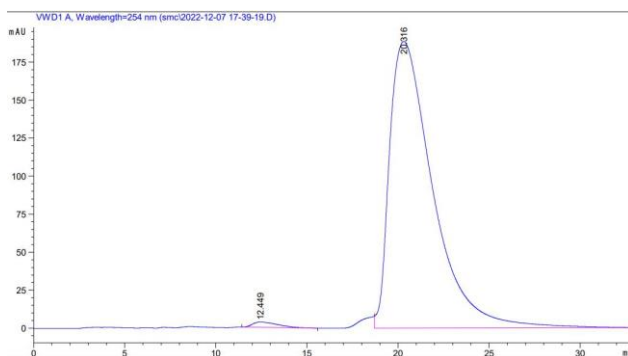

| Peak | RetTime | Area                  | Height    | Area    |
|------|---------|-----------------------|-----------|---------|
| 1    | 11.991  | 1.43108e <sup>4</sup> | 143.40851 | 50.1118 |

| Peak | RetTime | Area      | Height  | Area   |
|------|---------|-----------|---------|--------|
| 1    | 12.449  | 334.37659 | 3.42004 | 1.0629 |

|   |        |                       |          |         |   |        |                       |           |         |
|---|--------|-----------------------|----------|---------|---|--------|-----------------------|-----------|---------|
| 2 | 20.195 | 1.42469e <sup>4</sup> | 91.66684 | 49.8882 | 2 | 20.316 | 3.11239e <sup>4</sup> | 188.48344 | 98.9371 |
|---|--------|-----------------------|----------|---------|---|--------|-----------------------|-----------|---------|

**(R)-3-(4-methoxyphenyl)-6-methyl-2-(7-methylquinolin-8-yl)-2H-benzo[1,2]thiazine-1,1-dioxide (5ap).**

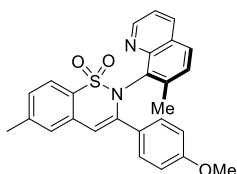

Yield: 83.0 mg (94%). White solid, mp: 238-239 °C. <sup>1</sup>H NMR (600 MHz, CDCl<sub>3</sub>) δ 9.01 (dd, *J* = 4.3, 1.7 Hz, 1H), 7.98 (dd, *J* = 8.2, 1.7 Hz, 1H), 7.68 (d, *J* = 8.0 Hz, 1H), 7.53 (t, *J* = 8.2 Hz, 3H), 7.39 – 7.27 (m, 2H), 7.26 – 7.21 (m, 1H), 7.13 (d, *J* = 8.4 Hz, 1H), 6.65 (s, 1H), 6.55 (d, *J* = 8.8 Hz, 2H), 3.61 (s, 3H), 2.46 (s, 3H), 2.10 (s, 3H). <sup>13</sup>C NMR (151 MHz, CDCl<sub>3</sub>) δ 160.4, 150.9, 146.9, 144.4, 142.2, 139.5, 135.5, 133.9, 133.7, 130.2, 129.5, 129.3, 128.4, 128.2, 128.1, 127.3, 127.1, 121.4, 120.9, 113.4, 110.0, 55.1, 21.7, 18.7. HRMS (ESI): *m/z* [M+H]<sup>+</sup> calcd for [C<sub>26</sub>H<sub>22</sub>N<sub>2</sub>O<sub>3</sub>S]<sup>+</sup> requires 443.1424, found 443.1422. [α]<sub>D</sub><sup>25</sup> = +153 (c = 0.1, CH<sub>2</sub>Cl<sub>2</sub>). The product was analyzed by HPLC to determine the enantiomeric excess: 99% ee (CHIRALPAK IB-H, hexane/*i*-PrOH = 80/20, detector: 254 nm, T = 25 °C, flow rate: 1 mL/min), *t*<sub>1</sub> (minor) = 27.39 min, *t*<sub>2</sub> (major) = 34.78 min.

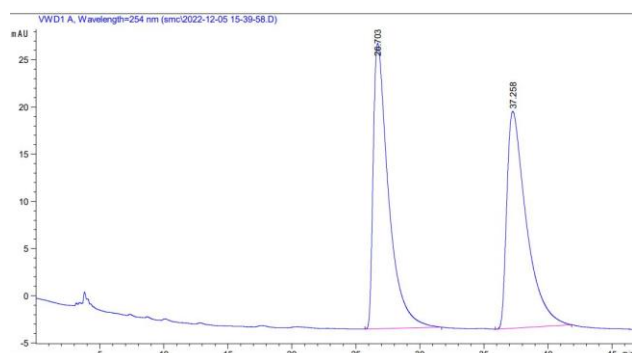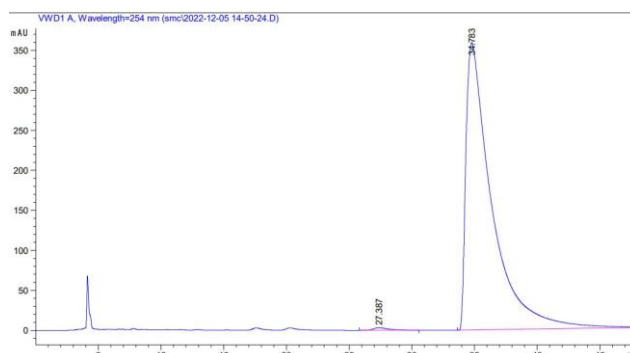

| Peak | RetTime | Area       | Height   | Area    |
|------|---------|------------|----------|---------|
| 1    | 26.703  | 2513.95728 | 30.25465 | 50.7221 |
| 2    | 37.258  | 2442.37427 | 22.99876 | 49.2779 |

| Peak | RetTime | Area                  | Height    | Area    |
|------|---------|-----------------------|-----------|---------|
| 1    | 27.387  | 266.75439             | 3.15039   | 0.5168  |
| 2    | 34.783  | 5.13528e <sup>4</sup> | 359.36899 | 99.4832 |

**(R)-3-(2-fluorophenyl)-6-methyl-2-(7-methylquinolin-8-yl)-2H-benzo[1,2]thiazine-1,1-dioxide (5aq).**

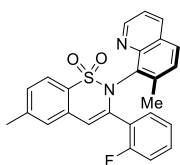

Yield: 77.5 mg (90%). White solid, mp: 216-217 °C. <sup>1</sup>H NMR (600 MHz, CDCl<sub>3</sub>) δ 8.93 (dd, *J* = 4.2, 1.7 Hz, 1H), 7.98 (dd, *J* = 8.2, 1.7 Hz, 1H), 7.73 (d, *J* = 8.0 Hz, 1H), 7.68 – 7.58 (m, 1H), 7.54 (d, *J* = 8.4 Hz, 1H), 7.39 (s, 1H), 7.31 (dd, *J* = 8.2, 4.3 Hz, 2H), 7.20 (d, *J* = 8.4 Hz, 1H), 7.09 – 6.98 (m, 1H), 6.92 – 6.84 (m, 1H), 6.81 (d, *J* = 1.9 Hz, 1H), 6.69 (t, *J* = 7.6 Hz, 1H), 2.50 (s, 3H), 2.26 (s, 3H). <sup>13</sup>C NMR (151 MHz, CDCl<sub>3</sub>) δ 160.2 (d, <sup>1</sup>*J*<sub>C-F</sub> = 251.0

Hz), 150.8, 146.7, 142.2, 140.5, 137.4, 135.4, 133.3, 133.0, 131.8, 130.6, 130.5 (d,  $^3J_{C-F} = 8.8$  Hz), 129.5, 128.9, 128.3, 127.7, 127.0, 123.3 (d,  $^4J_{C-F} = 3.4$  Hz), 123.1 (d,  $^2J_{C-F} = 11.9$  Hz), 121.4, 120.9, 115.6 (d,  $^2J_{C-F} = 22.0$  Hz), 114.4 (d,  $^3J_{C-F} = 4.4$  Hz), 21.7, 18.6.  $^{19}\text{F}$  NMR (565 MHz,  $\text{CDCl}_3$ )  $\delta$  -116.4. **HRMS** (ESI):  $m/z$   $[\text{M}+\text{H}]^+$  calcd for  $[\text{C}_{25}\text{H}_{19}\text{FN}_2\text{O}_2\text{S}]^+$  requires 431.1224, found 431.1234.  $[\alpha]_{\text{D}}^{25} = -175$  (c = 0.1,  $\text{CH}_2\text{Cl}_2$ ). The product was analyzed by HPLC to determine the enantiomeric excess: 99% ee (CHIRALPAK IB-H, hexane/*i*-PrOH = 80/20, detector: 254 nm, T = 25 °C, flow rate: 1 mL/min),  $t_1$  (minor) = 17.57 min,  $t_2$  (major) = 21.72 min.

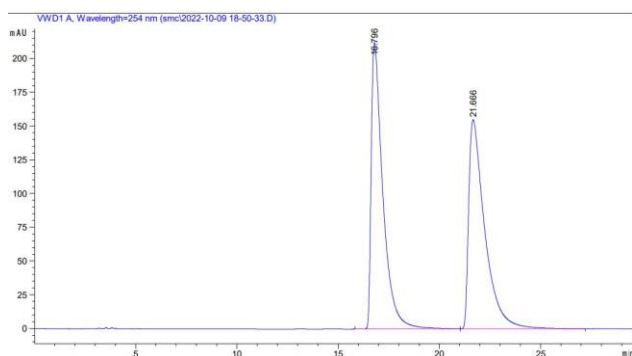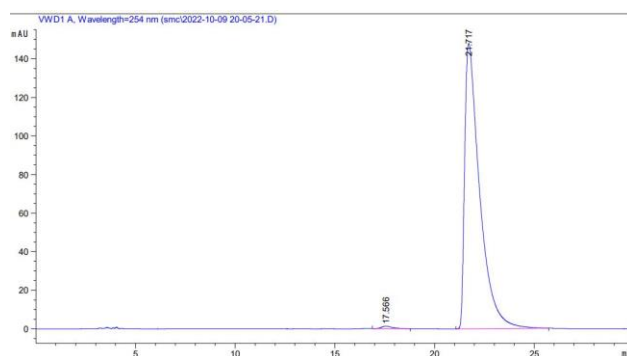

| Peak | RetTime | Area       | Height    | Area    |
|------|---------|------------|-----------|---------|
| 1    | 16.796  | 8502.19922 | 212.19034 | 49.9164 |
| 2    | 21.666  | 8530.67773 | 154.96280 | 50.0836 |

| Peak | RetTime | Area       | Height    | Area    |
|------|---------|------------|-----------|---------|
| 1    | 17.566  | 54.97084   | 1.34104   | 0.7055  |
| 2    | 21.717  | 7736.68994 | 147.97299 | 99.2945 |

**(R)-3-(3-chlorophenyl)-6-methyl-2-(7-methylquinolin-8-yl)-2H-benzo[1,2]thiazine-1,1-dioxide (5ar).**

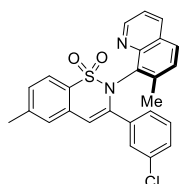

Yield: 76.5 mg (86%). White solid, mp: 218-219 °C.  $^1\text{H}$  NMR (600 MHz,  $\text{CDCl}_3$ )  $\delta$  9.00 (dd,  $J = 4.2, 1.7$  Hz, 1H), 8.01 (dd,  $J = 8.2, 1.7$  Hz, 1H), 7.71 (d,  $J = 7.9$  Hz, 1H), 7.66 (t,  $J = 1.9$  Hz, 1H), 7.57 (d,  $J = 8.3$  Hz, 1H), 7.49 (d,  $J = 7.9$  Hz, 1H), 7.39 (s, 1H), 7.35 (dd,  $J = 8.2, 4.2$  Hz, 1H), 7.30 (d,  $J = 6.6$  Hz, 1H), 7.18 (d,  $J = 8.4$  Hz, 1H), 7.08 – 7.05 (m, 1H), 6.97 (t,  $J = 7.9$  Hz, 1H), 6.74 (s, 1H), 2.50 (s, 3H), 2.16 (s, 3H).  $^{13}\text{C}$  NMR (151 MHz,  $\text{CDCl}_3$ )  $\delta$  151.0, 146.7, 143.2, 142.4, 139.7, 137.5, 135.5, 133.9, 133.3, 133.2, 130.5, 129.5, 129.2, 129.1, 128.9, 128.5, 127.9, 127.6, 127.1, 125.9, 121.5, 121.0, 111.9, 21.7, 18.7. **HRMS** (ESI):  $m/z$   $[\text{M}+\text{H}]^+$  calcd for  $[\text{C}_{25}\text{H}_{19}\text{ClN}_2\text{O}_2\text{S}]^+$  requires 447.0929, found 447.0933.  $[\alpha]_{\text{D}}^{25} = -73$  (c = 0.1,  $\text{CH}_2\text{Cl}_2$ ). The product was analyzed by HPLC to determine the enantiomeric excess: 91% ee (CHIRALPAK OD-H, hexane/*i*-PrOH = 90/10, detector: 254 nm, T = 25 °C, flow rate: 1 mL/min),  $t_1$  (minor) = 45.31min,  $t_2$  (major) = 56.73 min.

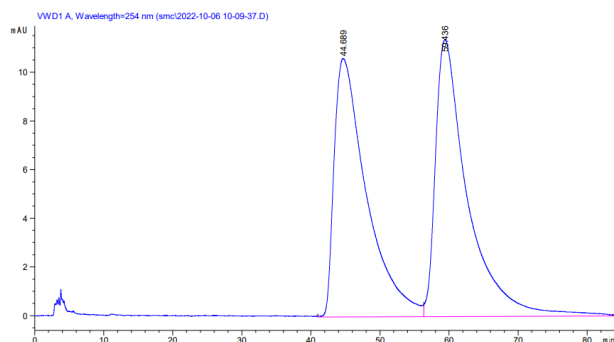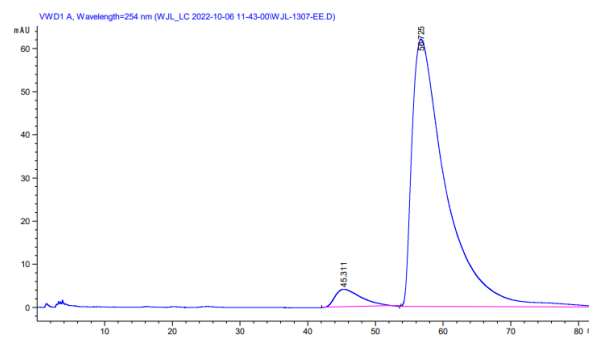

| Peak | RetTime | Area       | Height   | Area    |
|------|---------|------------|----------|---------|
| 1    | 44.689  | 3447.89453 | 10.61153 | 48.3388 |
| 2    | 59.436  | 3684.87964 | 11.37391 | 51.6612 |

| Peak | RetTime | Area                  | Height   | Area    |
|------|---------|-----------------------|----------|---------|
| 1    | 45.311  | 1076.86499            | 4.06268  | 4.7478  |
| 2    | 56.725  | 2.16044e <sup>4</sup> | 61.98511 | 95.2522 |

**(R)-6-methyl-2-(7-methylquinolin-8-yl)-3-(trimethylsilyl)-2H-benzo[1,2]thiazine-1,1-dioxide (5as).**

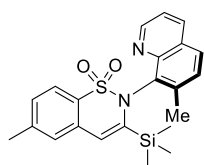

Yield: 77.6 mg (95%). White solid, mp: 184-185 °C. <sup>1</sup>H NMR (600 MHz, CDCl<sub>3</sub>) δ 9.02 (dd, *J* = 4.2, 1.7 Hz, 1H), 8.32 (dd, *J* = 8.2, 1.7 Hz, 1H), 8.00 (d, *J* = 8.4 Hz, 1H), 7.94 (d, *J* = 7.9 Hz, 1H), 7.67 (d, *J* = 8.4 Hz, 1H), 7.59 – 7.43 (m, 3H), 7.03 (s, 1H), 2.73 (s, 3H), 2.62 (s, 3H), 0.00 (s, 9H).

<sup>13</sup>C NMR (151 MHz, CDCl<sub>3</sub>) δ 152.1, 149.0, 148.4, 142.9, 142.5, 136.5, 135.4, 134.7, 131.5, 130.4, 130.0, 129.9, 128.4, 128.1, 122.1, 121.2, 22.8, 20.3, 0.00.

HRMS (ESI): *m/z* [M+H]<sup>+</sup> calcd for [C<sub>22</sub>H<sub>24</sub>N<sub>2</sub>O<sub>2</sub>SSi]<sup>+</sup> requires 409.1401, found 409.1404. [α]<sub>D</sub><sup>25</sup> = -393 (c = 0.1, CH<sub>2</sub>Cl<sub>2</sub>). The product was analyzed by HPLC to determine the enantiomeric excess: 99% ee. (CHIRALPAK AD-H, hexane/*i*-PrOH = 80/20, detector: 254 nm, T = 25 °C, flow rate: 1 mL/min), *t*<sub>1</sub> (major) = 13.86 min, *t*<sub>2</sub> (minor) = 22.42 min.

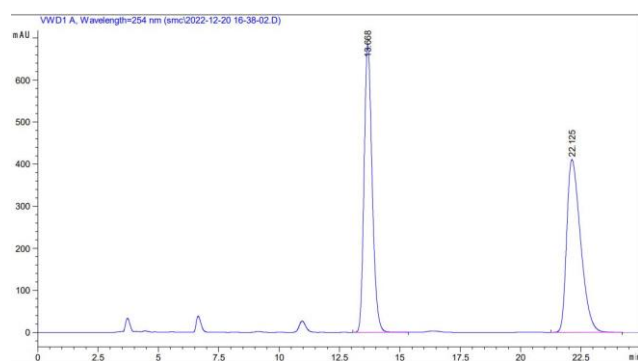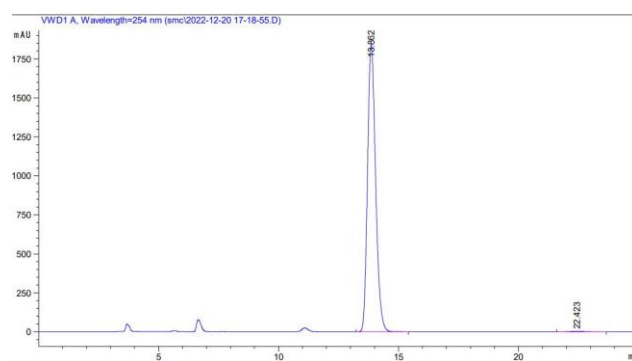

| Peak | RetTime | Area                  | Height    | Area    |
|------|---------|-----------------------|-----------|---------|
| 1    | 13.668  | 1.58902e <sup>4</sup> | 684.14288 | 49.2619 |
| 2    | 22.125  | 1.63664e <sup>4</sup> | 410.87125 | 50.7381 |

| Peak | RetTime | Area                  | Height     | Area    |
|------|---------|-----------------------|------------|---------|
| 1    | 13.862  | 4.31416e <sup>4</sup> | 1841.94287 | 99.6547 |
| 2    | 22.423  | 149.48857             | 3.76484    | 0.3453  |

**(R)-3-(diphenylphosphaneyl)-6-methyl-2-(7-methylquinolin-8-yl)-2H-benzo[e][1,2]thiazine 1,1-dioxide (5at).**

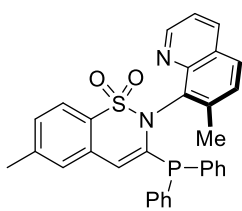

Yield: 57.2 mg (55%).  $^1\text{H NMR}$  (600 MHz,  $\text{CDCl}_3$ )  $\delta$  8.35 (dd,  $J = 4.2, 1.7$  Hz, 1H), 7.95 (dd,  $J = 8.2, 1.8$  Hz, 1H), 7.65 (t,  $J = 8.1$  Hz, 2H), 7.50 (dt,  $J = 7.3, 4.0$  Hz, 2H), 7.41 (t,  $J = 3.5$  Hz, 3H), 7.33 (d,  $J = 8.4$  Hz, 1H), 7.23 (d,  $J = 7.6$  Hz, 2H), 7.19 (t,  $J = 7.0$  Hz, 2H), 7.14 (dd,  $J = 8.2, 4.2$  Hz, 1H), 7.09 (t,  $J = 7.7$  Hz, 2H), 7.05 (s, 1H), 6.13 (s, 1H), 2.40 (s, 3H), 2.25 (s, 3H).  $^{13}\text{C NMR}$  (151 MHz,  $\text{CDCl}_3$ )  $\delta$  150.3, 146.8 (d,  $J = 13.3$  Hz), 146.7 (d,  $J = 2.4$  Hz), 142.5 (d,  $J = 2.2$  Hz), 141.9, 135.3, 134.9, 134.7, 134.1, 134.0, 133.8 (d,  $J = 10.4$  Hz), 133.4, 133.1 (d,  $J = 2.2$  Hz), 129.7, 129.6, 129.1 (d,  $J = 2.4$  Hz), 128.9, 128.8, 128.3, 128.2, 127.1, 121.1, 120.7, 118.1 (d,  $J = 4.5$  Hz), 21.7, 19.3 (d,  $J = 2.6$  Hz).  $^{31}\text{P NMR}$  (243 MHz,  $\text{CDCl}_3$ )  $\delta$  -7.91. **HRMS** (ESI):  $m/z$   $[\text{M}+\text{H}]^+$  calcd for  $[\text{C}_{31}\text{H}_{26}\text{N}_2\text{O}_2\text{PS}]^+$  requires 521.1447, found 521.1464.  $[\alpha]_{\text{D}}^{25} = -82$  ( $c = 0.1$ ,  $\text{CH}_2\text{Cl}_2$ ). The product was analyzed by HPLC to determine the enantiomeric excess: 99% ee (CHIRALPAK OD-H, hexane/*i*-PrOH = 80/20, detector: 254 nm, T = 25 °C, flow rate: 1 mL/min),  $t_1$  (minor) = 8.73 min,  $t_2$  (major) = 9.84 min.

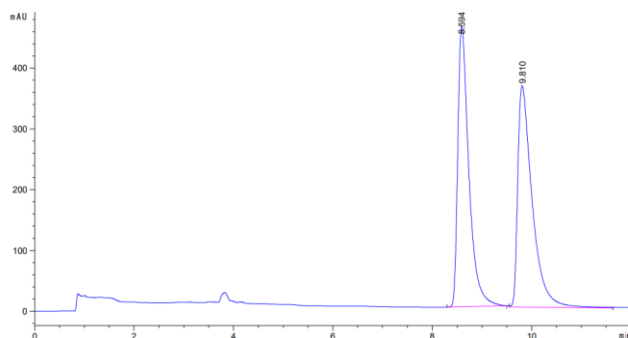

| Peak | RetTime | Area       | Height    | Area    |
|------|---------|------------|-----------|---------|
| 1    | 8.594   | 7153.47021 | 461.31271 | 49.3148 |
| 2    | 9.810   | 7352.25098 | 364.34186 | 50.6852 |

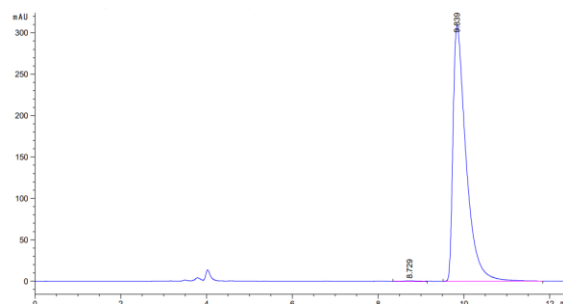

| Peak | RetTime | Area       | Height     | Area    |
|------|---------|------------|------------|---------|
| 1    | 8.729   | 21.98350   | 8.82406e-1 | 0.3362  |
| 2    | 9.839   | 6515.98682 | 308.91144  | 99.6638 |

**(R)-6-methyl-2-(7-methylquinolin-8-yl)-3-phenyl-2H-benzo[e][1,2]thiazine 1,1-dioxide (6a).**

Yield: 97.9 mg (95%). White solid, mp: 241-242 °C.  $^1\text{H NMR}$  (600 MHz,  $\text{CDCl}_3$ )  $\delta$  9.00 (dd,  $J = 4.2, 1.7$  Hz, 1H), 7.99 (dd,  $J = 8.2, 1.7$  Hz, 1H), 7.72 (d,  $J = 8.0$  Hz, 1H), 7.63 – 7.58 (m, 2H), 7.54 (d,  $J = 8.4$  Hz, 1H), 7.38 (s, 1H), 7.34 (dd,  $J = 8.2, 4.2$  Hz, 1H), 7.28 (dd,  $J = 8.1, 1.6$  Hz, 1H), 7.15 (d,  $J = 8.4$  Hz, 1H), 7.14 – 7.09 (m, 1H), 7.05 (dd,  $J = 8.4, 6.9$  Hz, 2H), 6.73 (s, 1H), 2.50 (s, 3H), 2.17 (s, 3H).  $^{13}\text{C NMR}$  (151 MHz,  $\text{CDCl}_3$ )  $\delta$  150.9, 146.8, 144.7, 142.2, 139.6, 135.8, 135.4, 133.7, 133.5, 130.3, 129.5, 129.2, 128.5, 128.3, 127.9, 127.9, 127.4, 127.1, 121.5, 121.0, 111.2, 21.8, 18.8. **HRMS** (ESI):  $m/z$   $[\text{M}+\text{H}]^+$  calcd

for  $[C_{25}H_{21}N_2O_2S]^+$  requires 413.1318, found 413.1328.  $[\alpha]_D^{25} = +119$  ( $c = 0.1$ ,  $CH_2Cl_2$ ). The product was analyzed by HPLC to determine the enantiomeric excess: 99% ee (CHIRALPAK IB-H, hexane/*i*-PrOH = 80/20, detector: 254 nm,  $T = 25$  °C, flow rate: 1 mL/min),  $t_1$  (minor) = 25.21 min,  $t_2$  (major) = 29.17 min.

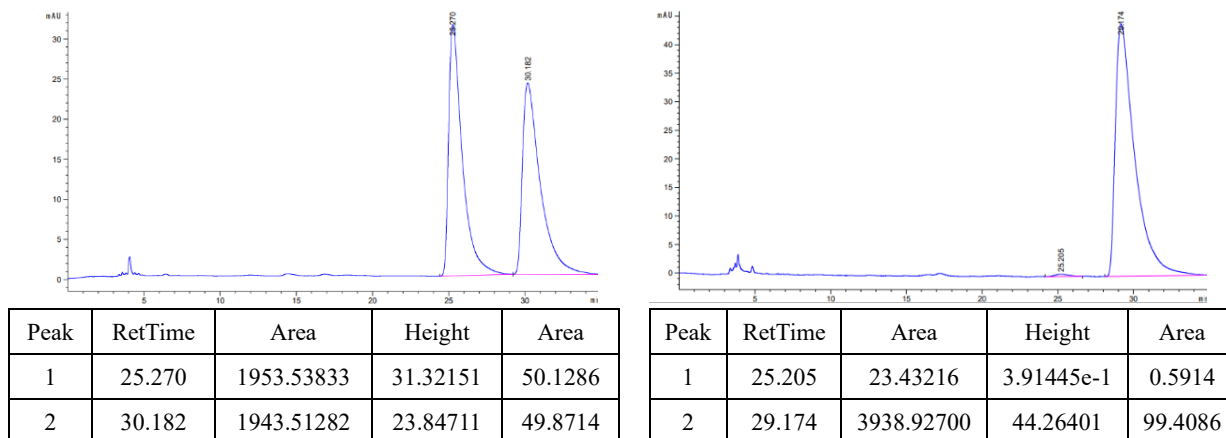

**(*R*)-6-(*tert*-butyl)-2-(7-methylquinolin-8-yl)-3-phenyl-2*H*-benzo[e][1,2]thiazine 1,1-dioxide (6b).**

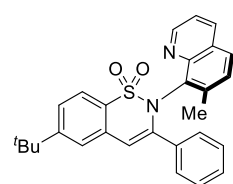

Yield: 111.2 mg (98%). White solid, mp: 112-113 °C.  $^1H$  NMR (600 MHz,  $CDCl_3$ )  $\delta$  8.95 (s, 1H), 7.89 (d,  $J = 8.2$  Hz, 1H), 7.74 (d,  $J = 8.3$  Hz, 1H), 7.62 (d,  $J = 7.6$  Hz, 2H), 7.55 (s, 1H), 7.46 (dd,  $J = 28.3, 8.4$  Hz, 2H), 7.24 (dd,  $J = 8.5, 4.2$  Hz, 1H), 7.09 – 6.96 (m, 4H), 6.77 (s, 1H), 2.12 (s, 3H), 1.39 (s, 9H).  $^{13}C$  NMR (151

MHz,  $CDCl_3$ )  $\delta$  155.4, 150.9, 146.9, 144.5, 139.6, 135.9, 135.5, 133.5, 133.5, 130.3, 129.5, 129.2, 128.3, 128.0, 127.9, 127.1, 125.2, 124.0, 121.3, 120.9, 111.7, 35.3, 31.3, 18.9. HRMS (ESI):  $m/z$   $[M+H]^+$  calcd for  $[C_{28}H_{27}N_2O_2S]^+$  requires 455.1788, found 455.1786.  $[\alpha]_D^{25} = +92$  ( $c = 0.1$ ,  $CH_2Cl_2$ ).

The product was analyzed by HPLC to determine the enantiomeric excess: 99% ee (CHIRALPAK IB-H, hexane/*i*-PrOH = 80/20, detector: 254 nm,  $T = 25$  °C, flow rate: 1 mL/min),  $t_1$  (minor) = 12.31 min,  $t_2$  (major) = 18.60 min.

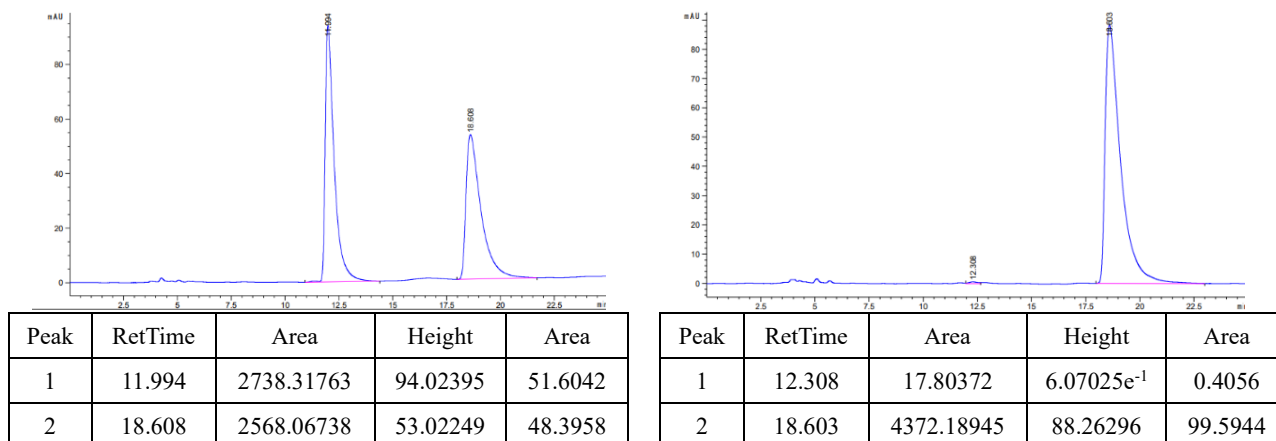

**(R)-6-methoxy-2-(7-methylquinolin-8-yl)-3-phenyl-2H-benzo[e][1,2]thiazine 1,1-dioxide (6c).**

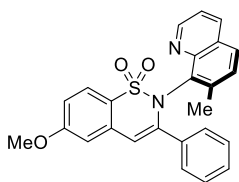

Yield: 106.0 mg (99%). White solid, mp: 266-267 °C. <sup>1</sup>H NMR (600 MHz, CDCl<sub>3</sub>) δ 8.99 (dd, *J* = 4.2, 1.7 Hz, 1H), 7.99 (dd, *J* = 8.2, 1.7 Hz, 1H), 7.74 (d, *J* = 8.6 Hz, 1H), 7.60 (d, *J* = 7.0 Hz, 2H), 7.54 (d, *J* = 8.4 Hz, 1H), 7.33 (dd, *J* = 8.2, 4.2 Hz, 1H), 7.16 (d, *J* = 8.4 Hz, 1H), 7.13 – 7.10 (m, 1H), 7.08 – 7.01 (m, 3H), 6.99 (dd, *J* = 8.6, 2.5 Hz, 1H), 6.72 (s, 1H), 3.92 (s, 3H), 2.21 (s, 3H). <sup>13</sup>C NMR (151 MHz, CDCl<sub>3</sub>) δ 162.2, 150.9, 146.8, 145.3, 139.7, 135.8, 135.7, 135.4, 133.5, 129.5, 129.3, 128.3, 127.9, 127.1, 125.8, 123.5, 120.9, 114.4, 111.0, 110.7, 55.7, 18.9. HRMS (ESI): *m/z* [M+H]<sup>+</sup> calcd for [C<sub>25</sub>H<sub>21</sub>N<sub>2</sub>O<sub>3</sub>S]<sup>+</sup> requires 429.1267, found 429.1272. [α]<sub>D</sub><sup>25</sup> = +168 (c = 0.1, CH<sub>2</sub>Cl<sub>2</sub>). The product was analyzed by HPLC to determine the enantiomeric excess: >99% ee (CHIRALPAK IB-H, hexane/*i*-PrOH = 80/20, detector: 254 nm, T = 25 °C, flow rate: 1 mL/min), *t*<sub>1</sub> (minor) = 22.70 min, *t*<sub>2</sub> (major) = 35.16 min.

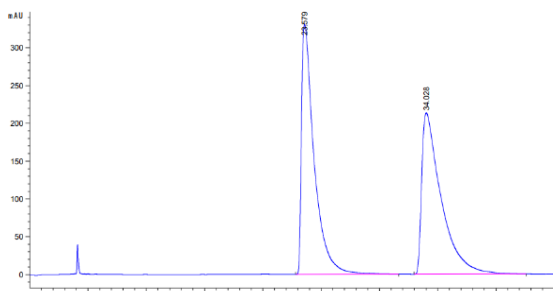

| Peak | RetTime | Area      | Height    | Area    |
|------|---------|-----------|-----------|---------|
| 1    | 23.579  | 2.49868e4 | 330.91678 | 50.3193 |
| 2    | 34.028  | 2.46697e4 | 213.52238 | 49.6807 |

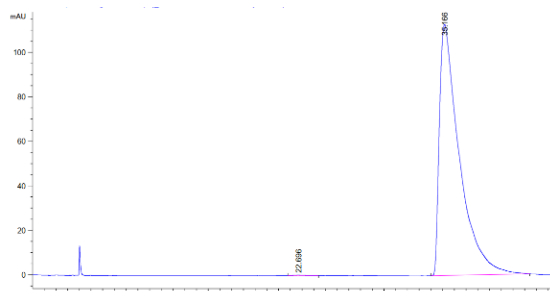

| Peak | RetTime | Area      | Height     | Area    |
|------|---------|-----------|------------|---------|
| 1    | 22.696  | 18.01620  | 2.29978e-1 | 0.1351  |
| 2    | 35.166  | 1.33196e4 | 112.88069  | 99.8649 |

**(R)-2-(7-methylquinolin-8-yl)-3,6-diphenyl-2H-benzo[e][1,2]thiazine 1,1-dioxide (6d).**

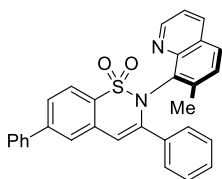

Yield: 113.9 mg (96%). White solid, mp: 272-273 °C. <sup>1</sup>H NMR (600 MHz, CDCl<sub>3</sub>) δ 8.99 (dd, *J* = 4.3, 1.7 Hz, 1H), 8.00 (dt, *J* = 8.4, 3.1 Hz, 1H), 7.90 (d, *J* = 8.1 Hz, 1H), 7.79 (d, *J* = 1.7 Hz, 1H), 7.73 – 7.67 (m, 3H), 7.65 – 7.61 (m, 2H), 7.58 – 7.49 (m, 3H), 7.47 – 7.43 (m, 1H), 7.37 – 7.32 (m, 1H), 7.20 – 7.16 (m, 1H), 7.15 – 7.11 (m, 1H), 7.07 (t, *J* = 7.6 Hz, 2H), 6.86 (s, 1H), 2.24 (s, 3H). <sup>13</sup>C NMR (151 MHz, CDCl<sub>3</sub>) δ 150.9, 146.8, 145.1, 144.8, 139.9, 139.7, 135.7, 135.5, 134.2, 133.5, 131.4, 129.5, 129.3, 129.1, 128.4, 128.3, 128.0, 127.9, 127.5, 127.1, 126.4, 125.8, 122.1, 122.1, 121.0, 111.3, 18.9. HRMS (ESI): *m/z* [M+H]<sup>+</sup> calcd for [C<sub>30</sub>H<sub>23</sub>N<sub>2</sub>O<sub>2</sub>S]<sup>+</sup> requires 475.1475, found 475.1468. [α]<sub>D</sub><sup>25</sup> = +92 (c = 0.1, CH<sub>2</sub>Cl<sub>2</sub>). The product was analyzed by HPLC to determine the enantiomeric excess: 99% ee (CHIRALPAK IB-H, hexane/*i*-PrOH



= 80/20, detector: 254 nm, T = 25 °C, flow rate: 1 mL/min),  $t_1$  (minor) = 22.14 min,  $t_2$  (major) = 30.92 min.

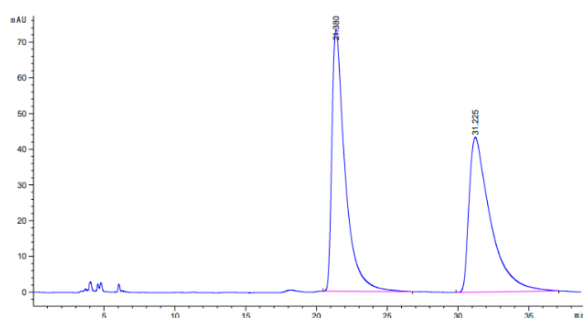

| Peak | RetTime | Area       | Height   | Area    |
|------|---------|------------|----------|---------|
| 1    | 21.380  | 4733.14648 | 73.31850 | 51.0734 |
| 2    | 31.225  | 4534.19336 | 43.37156 | 48.9266 |

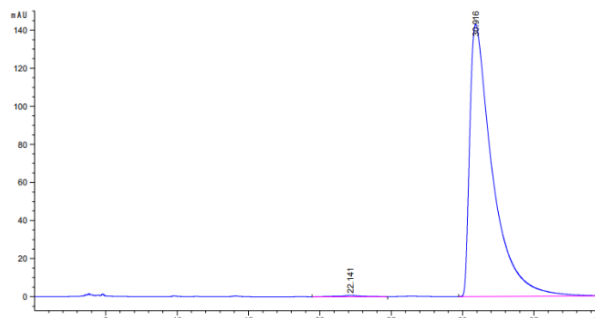

| Peak | RetTime | Area      | Height     | Area    |
|------|---------|-----------|------------|---------|
| 1    | 22.141  | 86.62561  | 7.39944e-1 | 0.5463  |
| 2    | 30.916  | 1.57696e4 | 143.04997  | 99.4537 |

**(R)-2-(7-methylquinolin-8-yl)-3-phenyl-2H-benzo[e][1,2]thiazine 1,1-dioxide (6e).**

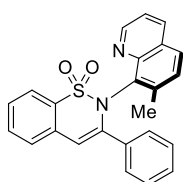

Yield: 98.9 mg (99%). White solid, mp: 155-165 °C.  $^1\text{H NMR}$  (600 MHz,  $\text{CDCl}_3$ )  $\delta$  8.97 (dd,  $J = 4.2, 1.7$  Hz, 1H), 7.99 (dd,  $J = 8.2, 1.7$  Hz, 1H), 7.83 (d,  $J = 7.8$  Hz, 1H), 7.65 (td,  $J = 7.6, 1.3$  Hz, 1H), 7.61 (ddd,  $J = 10.7, 5.6, 4.2$  Hz, 3H), 7.55 (d,  $J = 8.4$  Hz, 1H), 7.48 (td,  $J = 7.6, 1.3$  Hz, 1H), 7.34 (dd,  $J = 8.2, 4.2$  Hz, 1H), 7.16 (d,  $J = 8.4$  Hz, 1H), 7.14 – 7.10 (m, 1H), 7.06 (dd,  $J = 8.3, 6.9$  Hz, 2H), 6.80 (s, 1H), 2.20 (s, 3H).  $^{13}\text{C NMR}$  (151 MHz,  $\text{CDCl}_3$ )  $\delta$  150.9, 146.8, 144.7, 139.7, 135.7, 135.5, 133.7, 133.4, 132.7, 131.8, 129.4, 129.3, 128.3, 127.9, 127.9, 127.5, 127.2, 127.1, 121.5, 120.9, 111.2, 18.8. **HRMS** (ESI):  $m/z$   $[\text{M}+\text{H}]^+$  calcd for  $[\text{C}_{24}\text{H}_{19}\text{N}_2\text{O}_2\text{S}]^+$  requires 399.1162, found 399.1167.  $[\alpha]_{\text{D}}^{25} = +86$  ( $c = 0.1, \text{CH}_2\text{Cl}_2$ ). The product was analyzed by HPLC to determine the enantiomeric excess: 99% ee (CHIRALPAK IB-H, hexane/ $i$ -PrOH = 80/20, detector: 254 nm, T = 25 °C, flow rate: 1 mL/min),  $t_1$  (minor) = 17.44 min,  $t_2$  (major) = 21.75 min.

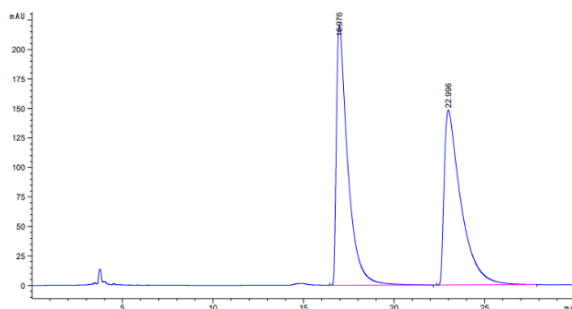

| Peak | RetTime | Area       | Height    | Area    |
|------|---------|------------|-----------|---------|
| 1    | 16.976  | 9637.76953 | 220.30920 | 50.2954 |
| 2    | 22.996  | 9524.56738 | 148.12575 | 49.7046 |

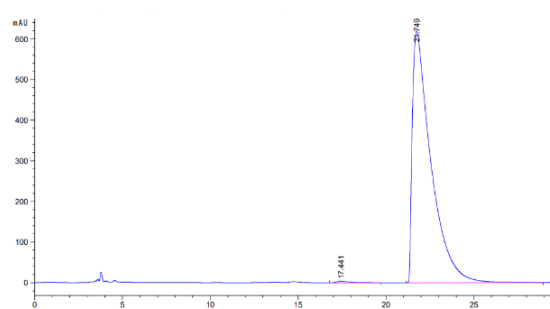

| Peak | RetTime | Area      | Height    | Area    |
|------|---------|-----------|-----------|---------|
| 1    | 17.441  | 176.20949 | 3.80723   | 0.3854  |
| 2    | 21.749  | 4.55457e4 | 619.00909 | 99.6146 |

**(R)-6-fluoro-2-(7-methylquinolin-8-yl)-3-phenyl-2H-benzo[e][1,2]thiazine 1,1-dioxide (6f).**

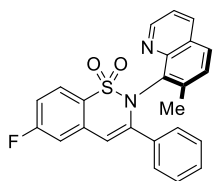

Yield: 96.1 mg (92%). White solid, mp: 223-224 °C.  $^1\text{H NMR}$  (600 MHz,  $\text{CDCl}_3$ )  $\delta$  8.91 (dd,  $J = 4.3, 1.8$  Hz, 1H), 7.98 (dd,  $J = 8.3, 1.8$  Hz, 1H), 7.81 (dd,  $J = 8.6, 5.2$  Hz, 1H), 7.61 – 7.53 (m, 3H), 7.32 (dd,  $J = 8.2, 4.2$ , 1H), 7.26 (dd,  $J = 9.3, 2.5$  Hz, 1H), 7.21 – 7.11 (m, 3H), 7.07 (dd,  $J = 8.4, 7.0$  Hz, 2H), 6.72 (s, 1H), 2.28 (s, 3H).  $^{13}\text{C NMR}$  (151 MHz,  $\text{CDCl}_3$ )  $\delta$  164.5 (d,  $^1J_{\text{C-F}} = 251.6$  Hz), 150.9, 146.6, 146.3, 139.8, 136.5 (d,  $^3J_{\text{C-F}} = 9.8$  Hz), 135.5, 135.5, 133.2, 129.5, 129.4, 128.7, 128.5, 128.0, 128.0, 127.1, 124.4 (d,  $^3J_{\text{C-F}} = 9.8$  Hz), 121.0, 115.1 (d,  $^2J_{\text{C-F}} = 23.7$  Hz), 113.2 (d,  $^2J_{\text{C-F}} = 23.1$  Hz), 110.4 (d,  $^4J_{\text{C-F}} = 2.5$  Hz), 19.0.  $^{19}\text{F NMR}$  (565 MHz,  $\text{CDCl}_3$ )  $\delta$  -106.9. **HRMS** (ESI):  $m/z$   $[\text{M}+\text{H}]^+$  calcd for  $[\text{C}_{24}\text{H}_{18}\text{FN}_2\text{O}_2\text{S}]^+$  requires 417.1068, found 417.1063.  $[\alpha]_{\text{D}}^{25} = +70$  ( $c = 0.1$ ,  $\text{CH}_2\text{Cl}_2$ ). The product was analyzed by HPLC to determine the enantiomeric excess: 99% ee (CHIRALPAK IB-H, hexane/*i*-PrOH = 80/20, detector: 254 nm, T = 25 °C, flow rate: 1 mL/min),  $t_1$  (minor) = 13.85 min,  $t_2$  (major) = 19.49 min.

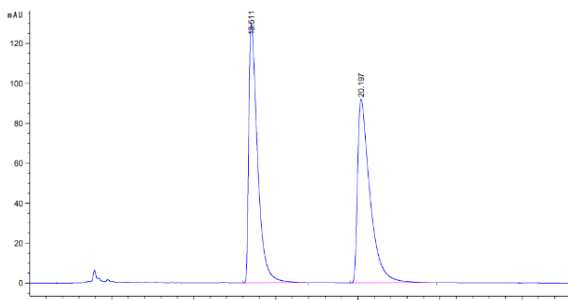

| Peak | RetTime | Area       | Height    | Area    |
|------|---------|------------|-----------|---------|
| 1    | 13.511  | 4819.27588 | 129.78621 | 49.8744 |
| 2    | 20.197  | 4843.54590 | 91.88331  | 50.1256 |

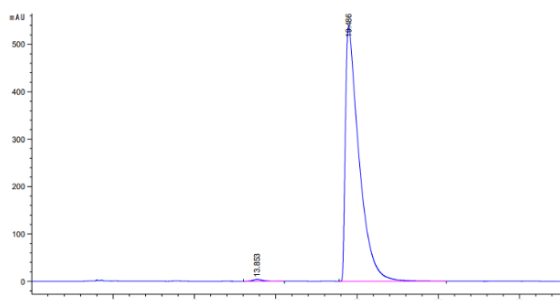

| Peak | RetTime | Area      | Height    | Area    |
|------|---------|-----------|-----------|---------|
| 1    | 13.853  | 188.21143 | 4.23566   | 0.5985  |
| 2    | 19.486  | 3.12586e4 | 538.54791 | 99.4015 |

**(R)-6-chloro-2-(7-methylquinolin-8-yl)-3-phenyl-2H-benzo[e][1,2]thiazine 1,1-dioxide (6g).**

Yield: 102.0 mg (94%). White solid, mp: 253-254 °C.  $^1\text{H NMR}$  (600 MHz,  $\text{CDCl}_3$ )  $\delta$  8.91 (dd,  $J = 4.3, 1.7$  Hz, 1H), 7.99 (dt,  $J = 8.2, 2.5$  Hz, 1H), 7.75 (d,  $J = 8.3$  Hz, 1H), 7.61 – 7.53 (m, 4H), 7.46 – 7.41 (m, 1H), 7.33 (dd,  $J = 8.1, 4.1$  Hz, 1H), 7.19 (dd,  $J = 8.4, 3.3$  Hz, 1H), 7.14 (t,  $J = 7.4$  Hz, 1H), 7.07 (t,  $J = 7.6$  Hz, 2H), 6.70 (s, 1H), 2.28 (s, 3H).  $^{13}\text{C NMR}$  (151 MHz,  $\text{CDCl}_3$ )  $\delta$  150.9, 146.6, 146.3, 139.8, 137.9, 135.5, 135.4, 133.2, 130.7, 129.6, 129.4, 128.5, 128.0, 128.0, 127.6, 127.0, 126.7, 123.3, 121.0, 110.1, 19.0. **HRMS** (ESI):  $m/z$   $[\text{M}+\text{H}]^+$  calcd for  $[\text{C}_{24}\text{H}_{18}\text{ClN}_2\text{O}_2\text{S}]^+$  requires 433.0772, found 433.0771.  $[\alpha]_{\text{D}}^{25} = +47$  ( $c = 0.1$ ,  $\text{CH}_2\text{Cl}_2$ ). The product was analyzed by HPLC to determine the enantiomeric excess: 95% ee

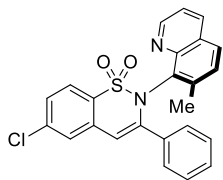

(CHIRALPAK IB-H, hexane/*i*-PrOH = 80/20, detector: 254 nm, T = 25 °C, flow rate: 1 mL/min),  $t_1$  (minor) = 12.68 min,  $t_2$  (major) = 17.36 min.

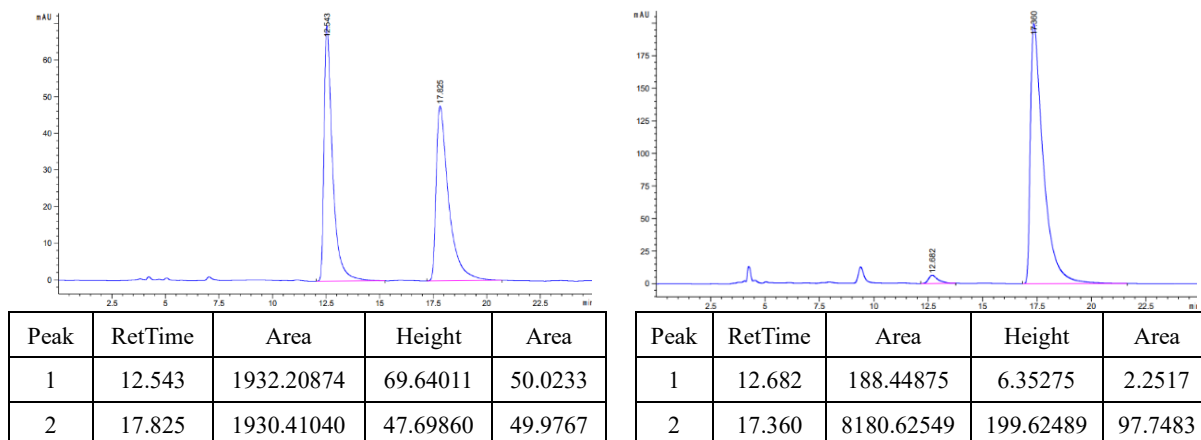

**(*R*)-6-bromo-2-(7-methylquinolin-8-yl)-3-phenyl-2*H*-benzo[*e*][1,2]thiazine 1,1-dioxide (6h).**

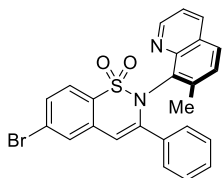

Yield: 108.9 mg (87%). White solid, mp: 271-272 °C.  $^1\text{H NMR}$  (600 MHz,  $\text{CDCl}_3$ )

$\delta$  8.91 (dd,  $J = 4.3, 1.7$  Hz, 1H), 7.99 (dd,  $J = 8.3, 1.7$  Hz, 1H), 7.75 (d,  $J = 1.8$  Hz, 1H), 7.68 (d,  $J = 8.3$  Hz, 1H), 7.61 – 7.54 (m, 4H), 7.33 (dd,  $J = 8.2, 4.2$  Hz, 1H),

7.19 (d,  $J = 8.4$  Hz, 1H), 7.16 – 7.12 (m, 1H), 7.07 (t,  $J = 7.6$  Hz, 2H), 6.69 (s, 1H), 2.28 (s, 3H).  $^{13}\text{C NMR}$  (151 MHz,  $\text{CDCl}_3$ )  $\delta$  150.9, 146.5, 146.3, 139.8, 135.6, 135.5, 135.4, 133.2, 131.1, 130.4, 129.7,

129.6, 129.4, 128.5, 128.0, 128.0, 127.0, 126.2, 123.3, 121.0, 110.0, 19.0. **HRMS** (ESI):  $m/z$   $[\text{M}+\text{Na}]^+$

calcd for  $[\text{C}_{24}\text{H}_{17}\text{BrN}_2\text{NaO}_2\text{S}]^+$  requires 499.0886, found 499.0087.  $[\alpha]_D^{25} = +27$  ( $c = 0.1$ ,  $\text{CH}_2\text{Cl}_2$ ).

The product was analyzed by HPLC to determine the enantiomeric excess: 99% ee (CHIRALPAK IB-H, hexane/*i*-PrOH = 80/20, detector: 254 nm, T = 25 °C, flow rate: 1 mL/min),  $t_1$  (minor) = 12.97 min,  $t_2$  (major) = 17.57 min.

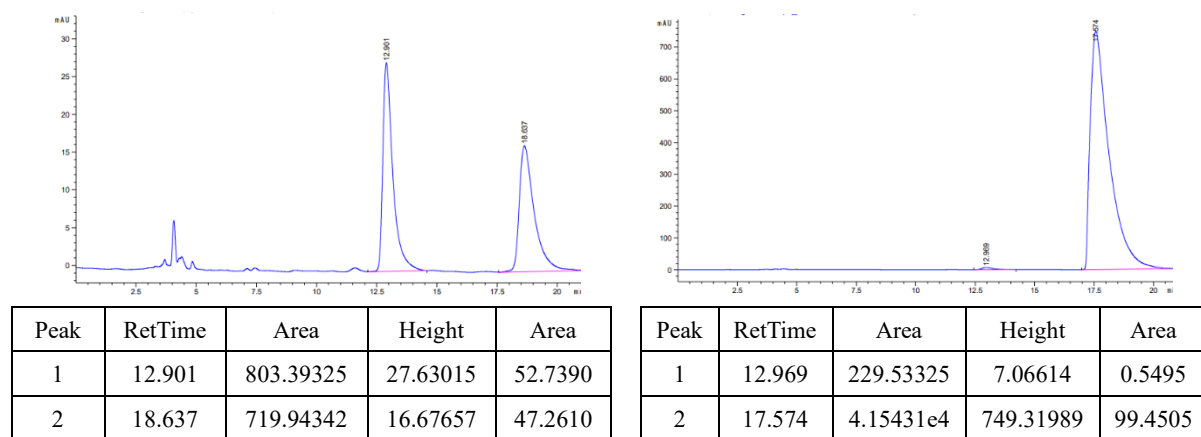

**(*R*)-2-(7-methylquinolin-8-yl)-3-phenyl-6-(trifluoromethyl)-2*H*-benzo[*e*][1,2]thiazine 1,1-dioxide (6i).**

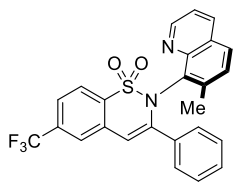

Yield: 100.4 mg (86%). White solid, mp: 210-211 °C. <sup>1</sup>H NMR (600 MHz,

CDCl<sub>3</sub>) δ 8.86 (dd, *J* = 4.3, 1.7 Hz, 1H), 8.01 (dd, *J* = 8.3, 1.8 Hz, 1H), 7.93 (d,

*J* = 8.1 Hz, 1H), 7.88 (s, 1H), 7.74 – 7.69 (m, 1H), 7.61 – 7.54 (m, 3H), 7.34 (dd,

*J* = 8.2, 4.2 Hz, 1H), 7.22 (d, *J* = 8.4 Hz, 1H), 7.19 – 7.13 (m, 1H), 7.09 (dd, *J* =

8.4, 7.0 Hz, 2H), 6.83 (s, 1H), 2.31 (s, 3H). <sup>13</sup>C NMR (151 MHz, CDCl<sub>3</sub>) δ 150.9, 146.6, 146.4, 139.9,

135.5, 135.3, 134.5, 134.5, 133.7 (q, <sup>2</sup>*J*<sub>C-F</sub> = 32.8 Hz), 133.1, 129.7, 129.3, 128.6, 128.1, 128.0, 127.1,

124.2 (q, <sup>4</sup>*J*<sub>C-F</sub> = 3.9 Hz), 124.0 (q, <sup>4</sup>*J*<sub>C-F</sub> = 3.6 Hz), 123.5 (q, <sup>1</sup>*J*<sub>C-F</sub> = 272.9 Hz), 122.55, 121.1, 110.5,

19.1. <sup>19</sup>F NMR (565 MHz, CDCl<sub>3</sub>) δ -62.8. HRMS (ESI): *m/z* [M+H]<sup>+</sup> calcd for [C<sub>25</sub>H<sub>18</sub>F<sub>3</sub>N<sub>2</sub>O<sub>2</sub>S]<sup>+</sup>

requires 467.1036, found 467.1041. [α]<sub>D</sub><sup>25</sup> = +40 (c = 0.1, CH<sub>2</sub>Cl<sub>2</sub>). The product was analyzed by

HPLC to determine the enantiomeric excess: 99% ee (CHIRALPAK IB-H, hexane/*i*-PrOH = 80/20,

detector: 254 nm, T = 25 °C, flow rate: 1 mL/min), *t*<sub>1</sub> (minor) = 9.66 min, *t*<sub>2</sub> (major) = 13.09 min.

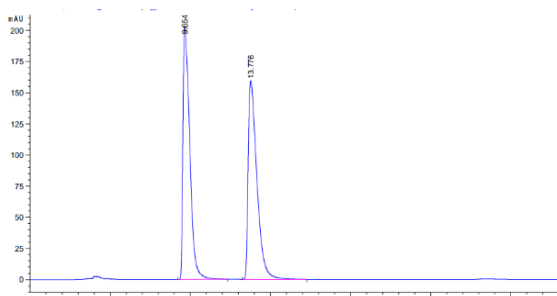

| Peak | RetTime | Area       | Height    | Area    |
|------|---------|------------|-----------|---------|
| 1    | 9.654   | 6015.36279 | 202.34924 | 49.8957 |
| 2    | 13.776  | 6040.52295 | 159.58882 | 50.1043 |

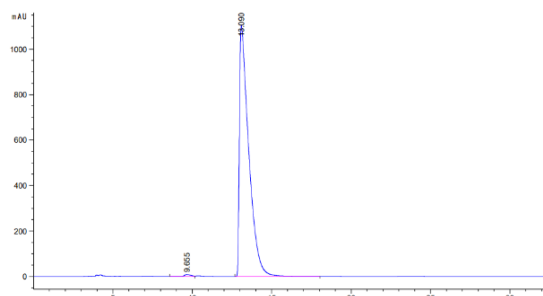

| Peak | RetTime | Area      | Height     | Area    |
|------|---------|-----------|------------|---------|
| 1    | 9.655   | 230.09375 | 8.29641    | 0.5077  |
| 2    | 13.090  | 4.50919e4 | 1104.99731 | 99.4923 |

**(R)-7-chloro-2-(7-methylquinolin-8-yl)-3-phenyl-2H-benzo[e][1,2]thiazine 1,1-dioxide (6j).**

Yield: 104.6 mg (97%). White solid, mp: 160-161 °C. <sup>1</sup>H NMR (600 MHz, CDCl<sub>3</sub>)

δ 8.92 (dd, *J* = 4.3, 1.7 Hz, 1H), 7.97 (dd, *J* = 8.2, 1.8 Hz, 1H), 7.81 (d, *J* = 2.1 Hz,

1H), 7.58 (dd, *J* = 8.1, 2.2 Hz, 3H), 7.53 (t, *J* = 9.0 Hz, 2H), 7.31 (dd, *J* = 8.3, 4.2

Hz, 1H), 7.18 – 7.11 (m, 2H), 7.06 (t, *J* = 7.6 Hz, 2H), 6.74 (s, 1H), 2.24 (s, 3H).

<sup>13</sup>C NMR (151 MHz, CDCl<sub>3</sub>) δ 150.9, 146.6, 145.1, 139.8, 135.5, 135.5, 133.3, 133.1, 133.0, 132.2,

132.1, 129.5, 129.4, 128.7, 128.6, 128.0, 127.9, 127.1, 121.6, 121.0, 110.6, 19.0. HRMS (ESI): *m/z*

[M+H]<sup>+</sup> calcd for [C<sub>24</sub>H<sub>18</sub>ClN<sub>2</sub>O<sub>2</sub>S]<sup>+</sup> requires 433.0772, found 433.0779. [α]<sub>D</sub><sup>25</sup> = +26 (c = 0.1,

CH<sub>2</sub>Cl<sub>2</sub>). The product was analyzed by HPLC to determine the enantiomeric excess: 99% ee

(CHIRALPAK IB-H, hexane/*i*-PrOH = 80/20, detector: 254 nm, T = 25 °C, flow rate: 1 mL/min), *t*<sub>1</sub>

(minor) = 10.89 min, *t*<sub>2</sub> (major) = 12.70 min.

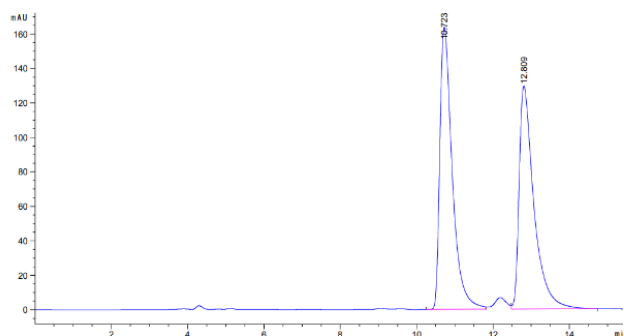

| Peak | RetTime | Area       | Height    | Area    |
|------|---------|------------|-----------|---------|
| 1    | 10.723  | 3684.32471 | 163.78735 | 51.4714 |
| 2    | 12.809  | 3473.67749 | 129.40588 | 48.5286 |

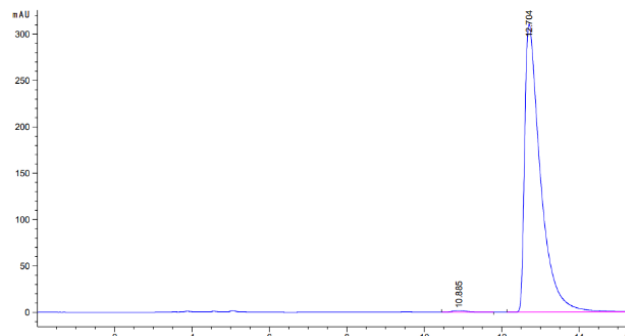

| Peak | RetTime | Area       | Height    | Area    |
|------|---------|------------|-----------|---------|
| 1    | 10.885  | 43.94597   | 1.89305   | 0.4959  |
| 2    | 12.704  | 8817.66797 | 310.40289 | 99.5041 |

**(R)-7-bromo-2-(7-methylquinolin-8-yl)-3-phenyl-2H-benzo[e][1,2]thiazine 1,1-dioxide (6k).**

Yield: 106.3 mg (89%). White solid, mp: 235-236 °C. <sup>1</sup>H NMR (600 MHz, CDCl<sub>3</sub>) δ 8.92 (dd, *J* = 4.2,

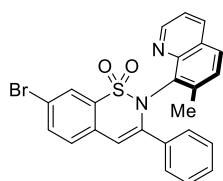

1.7 Hz, 1H), 7.99 (dd, *J* = 8.2, 1.7 Hz, 1H), 7.95 (d, *J* = 2.0 Hz, 1H), 7.74 (dd, *J* = 8.4, 2.0 Hz, 1H), 7.60 – 7.54 (m, 3H), 7.47 (d, *J* = 8.4 Hz, 1H), 7.33 (dd, *J* = 8.3, 4.2 Hz, 1H), 7.18 (d, *J* = 8.4 Hz, 1H), 7.15 – 7.12 (m, 1H), 7.06 (t, *J* = 7.6 Hz, 2H),

6.74 (s, 1H), 2.25 (s, 3H). <sup>13</sup>C NMR (151 MHz, CDCl<sub>3</sub>) δ 150.9, 146.6, 145.3, 139.8, 135.5, 135.5, 134.9, 133.5, 133.2, 132.6, 129.5, 129.4, 128.8, 128.5, 128.0, 127.9, 127.1, 124.5, 121.0, 120.5, 110.6, 19.0. HRMS (ESI): *m/z* [M+H]<sup>+</sup> calcd for [C<sub>24</sub>H<sub>18</sub>BrN<sub>2</sub>O<sub>2</sub>S]<sup>+</sup> requires 477.0267, found 477.0266.

[α]<sub>D</sub><sup>25</sup> = +41 (c = 0.1, CH<sub>2</sub>Cl<sub>2</sub>). The product was analyzed by HPLC to determine the enantiomeric excess: 99% ee (CHIRALPAK IB-H, hexane/*i*-PrOH = 80/20, detector: 254 nm, T = 25 °C, flow rate: 1 mL/min), *t*<sub>1</sub> (minor) = 11.11 min, *t*<sub>2</sub> (major) = 13.07 min.

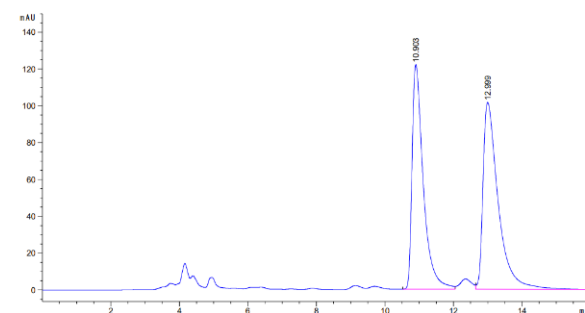

| Peak | RetTime | Area       | Height    | Area    |
|------|---------|------------|-----------|---------|
| 1    | 10.903  | 2763.53760 | 121.94778 | 46.8755 |
| 2    | 12.999  | 3131.94507 | 101.48201 | 53.1245 |

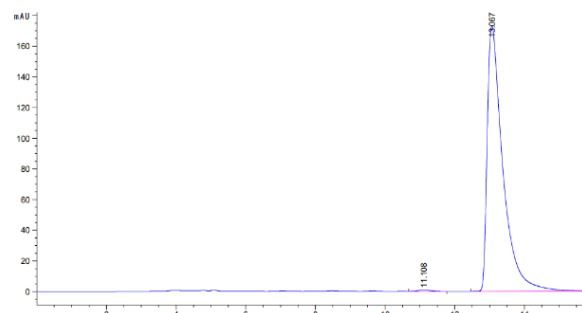

| Peak | RetTime | Area       | Height    | Area    |
|------|---------|------------|-----------|---------|
| 1    | 11.108  | 28.33352   | 1.03326   | 0.5230  |
| 2    | 13.067  | 5388.89551 | 173.19127 | 99.4770 |

**(R)-8-fluoro-2-(7-methylquinolin-8-yl)-3-phenyl-2H-benzo[e][1,2]thiazine 1,1-dioxide (6l).**

Yield: 67.3 mg (65%). White solid, mp: 260-261 °C. <sup>1</sup>H NMR (600 MHz, CDCl<sub>3</sub>) δ 8.89 (dd, *J* = 4.2,

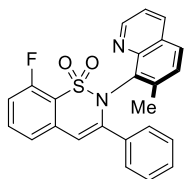

1.7 Hz, 1H), 7.96 (dd, *J* = 8.2, 1.8 Hz, 1H), 7.62 – 7.50 (m, 4H), 7.33 (d, *J* = 7.9 Hz, 1H), 7.29 (dd, *J* = 8.2, 4.2 Hz, 1H), 7.18 – 7.04 (m, 5H), 6.76 (d, *J* = 1.9 Hz, 1H), 2.31 (s, 3H). <sup>13</sup>C NMR (151 MHz, CDCl<sub>3</sub>) δ 156.7 (d, <sup>1</sup>*J*<sub>C-F</sub> = 257.3 Hz), 150.8, 146.7,

145.4, 140.0, 136.7, 135.5, 135.5, 133.3, 132.9 (d, <sup>3</sup>*J*<sub>C-F</sub> = 8.6 Hz), 129.5 (d, <sup>3</sup>*J*<sub>C-F</sub> = 12.4 Hz), 128.5,

128.0, 127.8, 127.1, 123.1 (d, <sup>4</sup>*J*<sub>C-F</sub> = 3.7 Hz), 121.2 (d, <sup>2</sup>*J*<sub>C-F</sub> = 14.1 Hz), 120.9, 114.8 (d, <sup>2</sup>*J*<sub>C-F</sub> = 20.9

Hz), 111.2, 19.1. <sup>19</sup>F NMR (565 MHz, CDCl<sub>3</sub>) δ -113.8. HRMS (ESI): *m/z* [M+H]<sup>+</sup> calcd for

[C<sub>24</sub>H<sub>18</sub>FN<sub>2</sub>O<sub>2</sub>S]<sup>+</sup> requires 417.1071, found 417.1068. [α]<sub>D</sub><sup>25</sup> = +44 (c = 0.1, CH<sub>2</sub>Cl<sub>2</sub>). The product

was analyzed by HPLC to determine the enantiomeric excess: 99% ee (CHIRALPAK IB-H, hexane/*i*-

PrOH = 80/20, detector: 254 nm, T = 25 °C, flow rate: 1 mL/min), *t*<sub>1</sub> (minor) = 17.49 min, *t*<sub>2</sub> (major)

= 19.86 min.

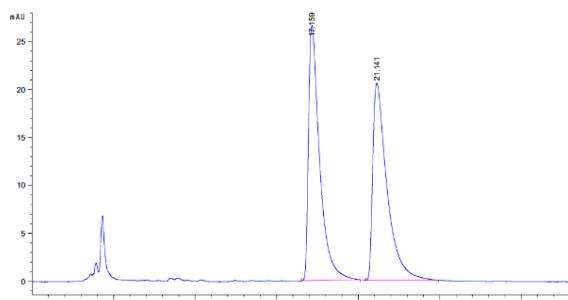

| Peak | RetTime | Area       | Height   | Area    |
|------|---------|------------|----------|---------|
| 1    | 17.159  | 1262.42249 | 26.61270 | 50.3652 |
| 2    | 21.141  | 1244.11536 | 20.54607 | 49.6348 |

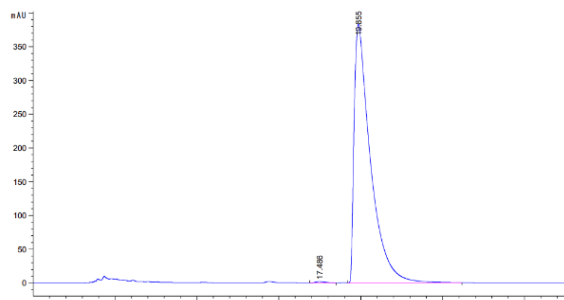

| Peak | RetTime | Area      | Height    | Area    |
|------|---------|-----------|-----------|---------|
| 1    | 17.486  | 68.68462  | 1.70766   | 0.2595  |
| 2    | 19.855  | 2.63977e4 | 383.00177 | 99.7405 |

**(R)-6,7-dimethoxy-2-(7-methylquinolin-8-yl)-3-phenyl-2H-benzo[e][1,2]thiazine 1,1-dioxide**

**(6m).**

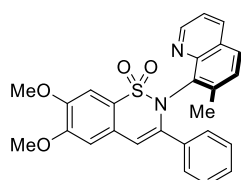

Yield: 106.2 mg (93%). White solid, mp: 245-246 °C. <sup>1</sup>H NMR (600 MHz,

CDCl<sub>3</sub>) δ 9.00 (dd, *J* = 4.2, 1.7 Hz, 1H), 7.95 (dd, *J* = 8.2, 1.7 Hz, 1H), 7.62 –

7.58 (m, 2H), 7.49 (d, *J* = 8.4 Hz, 1H), 7.30 (dd, *J* = 8.2, 4.2 Hz, 1H), 7.26 (s,

1H), 7.08 (dd, *J* = 16.4, 7.9 Hz, 2H), 7.04 – 6.98 (m, 3H), 6.67 (s, 1H), 3.97 (s,

3H), 3.87 (s, 3H), 2.13 (s, 3H). <sup>13</sup>C NMR (151 MHz, CDCl<sub>3</sub>) δ 152.1, 150.9, 148.9, 146.8, 143.1,

139.6, 135.8, 135.5, 133.4, 129.5, 129.0, 128.3, 127.9, 127.8, 127.8, 127.1, 125.4, 120.9, 111.0, 109.0,

103.6, 56.3, 18.8. HRMS (ESI): *m/z* [M+H]<sup>+</sup> calcd for [C<sub>26</sub>H<sub>23</sub>N<sub>2</sub>O<sub>4</sub>S]<sup>+</sup> requires 459.1373, found

459.1375.  $[\alpha]_D^{25} = +358$  ( $c = 0.1$ ,  $\text{CH}_2\text{Cl}_2$ ). The product was analyzed by HPLC to determine the enantiomeric excess: 99% ee (CHIRALPAK IB-H, hexane/*i*-PrOH = 80/20, detector: 254 nm, T = 25 °C, flow rate: 1 mL/min),  $t_1$  (minor) = 35.52 min,  $t_2$  (major) = 38.01 min.

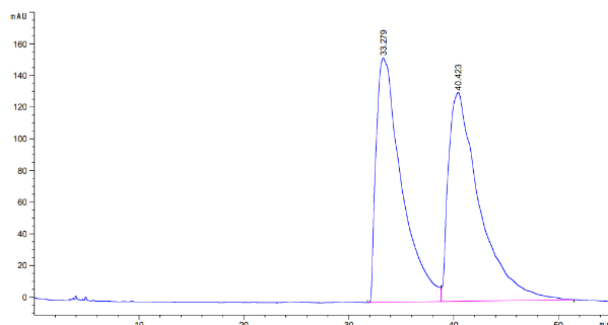

| Peak | RetTime | Area      | Height    | Area    |
|------|---------|-----------|-----------|---------|
| 1    | 33.279  | 2.61653e4 | 154.35413 | 48.9211 |
| 2    | 40.423  | 2.73194e4 | 131.84772 | 51.0789 |

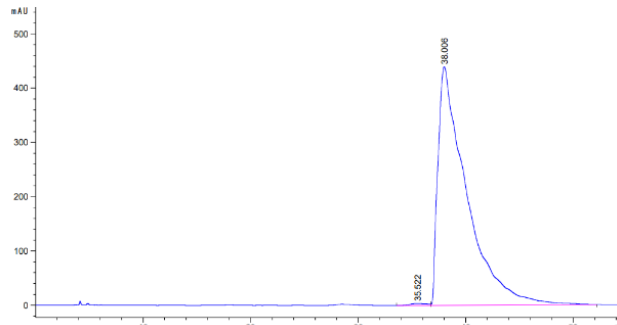

| Peak | RetTime | Area      | Height    | Area    |
|------|---------|-----------|-----------|---------|
| 1    | 35.522  | 382.63260 | 3.41365   | 0.4692  |
| 2    | 38.006  | 8.11617e4 | 439.53998 | 99.5308 |

**(R)-2-(7-methylquinolin-8-yl)-3-phenyl-2H-naphtho[2,1-e][1,2]thiazine 1,1-dioxide (6n).**

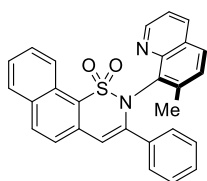

Yield: 96.5 mg (86%). White solid, mp: 266-267 °C.  $^1\text{H NMR}$  (600 MHz,  $\text{CDCl}_3$ )  $\delta$  9.06 – 8.97 (m, 2H), 8.09 – 7.96 (m, 2H), 7.88 (dd,  $J = 7.5, 2.0$  Hz, 1H), 7.69 – 7.66 (m, 2H), 7.61 (dd,  $J = 8.6, 3.7$  Hz, 1H), 7.58 – 7.50 (m, 3H), 7.35 (dt,  $J = 8.3, 4.7$  Hz, 1H), 7.18 – 7.13 (m, 2H), 7.08 (t,  $J = 7.6$  Hz, 2H), 6.86 (s, 1H), 2.19 (s, 3H).

$^{13}\text{C NMR}$  (151 MHz,  $\text{CDCl}_3$ )  $\delta$  151.1, 147.0, 145.3, 140.0, 135.5, 135.4, 133.9, 133.7, 132.9, 132.4, 129.4, 128.6, 128.4, 128.3, 128.0, 127.4, 127.0, 126.8, 126.4, 125.4, 124.1, 121.0, 111.4, 18.8. **HRMS** (ESI):  $m/z$   $[\text{M}+\text{H}]^+$  calcd for  $[\text{C}_{28}\text{H}_{21}\text{N}_2\text{O}_2\text{S}]^+$  requires 449.1318, found 449.1318.  $[\alpha]_D^{25} = +70$  ( $c = 0.1$ ,  $\text{CH}_2\text{Cl}_2$ ). The product was analyzed by HPLC to determine the enantiomeric excess: >99% ee (CHIRALPAK IB-H, hexane/*i*-PrOH = 80/20, detector: 254 nm, T = 25 °C, flow rate: 1 mL/min),  $t_1$  (minor) = 16.43 min,  $t_2$  (major) = 17.34 min.

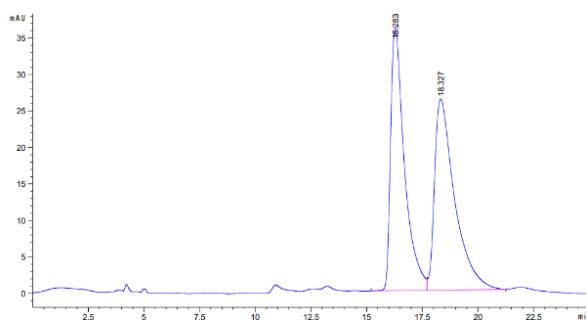

| Peak | RetTime | Area       | Height   | Area    |
|------|---------|------------|----------|---------|
| 1    | 16.283  | 1560.86987 | 36.10542 | 48.7166 |

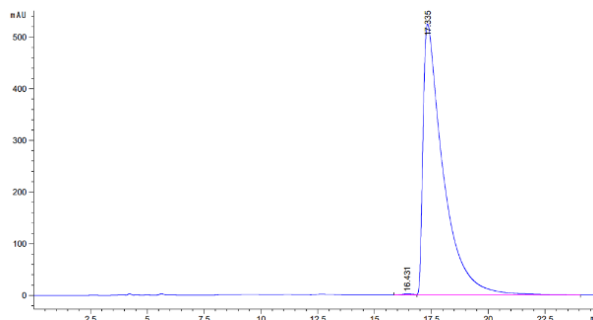

| Peak | RetTime | Area     | Height  | Area   |
|------|---------|----------|---------|--------|
| 1    | 16.431  | 71.26311 | 2.15012 | 0.2213 |

|   |        |            |          |         |
|---|--------|------------|----------|---------|
| 2 | 18.327 | 1643.10693 | 26.18628 | 51.2834 |
|---|--------|------------|----------|---------|

|   |        |           |           |         |
|---|--------|-----------|-----------|---------|
| 2 | 17.335 | 3.21266e4 | 524.16840 | 99.7787 |
|---|--------|-----------|-----------|---------|

**(R)-2-(7-methylquinolin-8-yl)-3-phenyl-2H-thieno[3,2-e][1,2]thiazine 1,1-dioxide (6o).**

Yield: 42.3 mg (42%). White solid, mp: 260-261 °C. <sup>1</sup>H NMR (600 MHz, CDCl<sub>3</sub>) δ 9.04 (dd, *J* = 4.2, 1.7 Hz, 1H), 8.01 (dd, *J* = 8.2, 1.7 Hz, 1H), 7.62 – 7.54 (m, 4H), 7.37 (dd, *J* = 8.2, 4.2 Hz, 1H), 7.20 (d, *J* = 5.1 Hz, 1H), 7.16 (d, *J* = 8.4 Hz, 1H), 7.13 – 7.09 (m, 1H), 7.04 (dd, *J* = 8.4, 7.0 Hz, 2H), 6.82 (s, 1H), 2.15 (s, 3H). <sup>13</sup>C NMR (151 MHz, CDCl<sub>3</sub>) δ 151.0, 146.9, 144.8, 141.7, 139.9, 135.5, 133.3, 129.5, 129.2, 128.7, 128.5, 128.4, 127.9, 127.9, 127.0, 125.5, 121.0, 107.7, 18.6. HRMS (ESI): *m/z* [M+H]<sup>+</sup> calcd for [C<sub>22</sub>H<sub>17</sub>N<sub>2</sub>O<sub>2</sub>S<sub>2</sub>]<sup>+</sup> requires 405.0726, found 405.0739. [α]<sub>D</sub><sup>25</sup> = +173 (c = 0.1, CH<sub>2</sub>Cl<sub>2</sub>). The product was analyzed by HPLC to determine the enantiomeric excess: 93% ee (CHIRALPAK IB-H, hexane/*i*-PrOH = 80/20, detector: 254 nm, T = 25 °C, flow rate: 1 mL/min), *t*<sub>1</sub> (minor) = 22.32 min, *t*<sub>2</sub> (major) = 25.29 min.

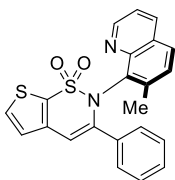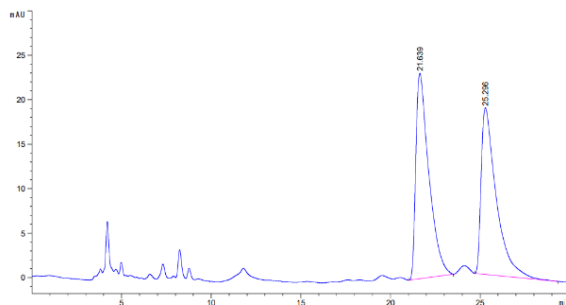

| Peak | RetTime | Area       | Height   | Area    |
|------|---------|------------|----------|---------|
| 1    | 21.639  | 1166.77783 | 23.08001 | 51.6056 |
| 2    | 25.296  | 1094.17285 | 18.72970 | 48.3944 |

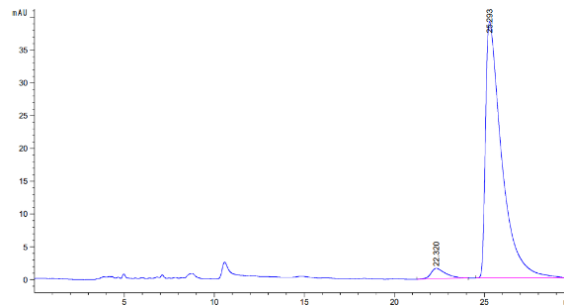

| Peak | RetTime | Area       | Height   | Area    |
|------|---------|------------|----------|---------|
| 1    | 22.320  | 90.32493   | 1.58532  | 3.5759  |
| 2    | 25.293  | 2435.61475 | 39.07062 | 96.4241 |

**(R)-4-(6-methyl-2-(7-methylquinolin-8-yl)-1,1-dioxido-2H-benzo[e][1,2]thiazin-3-yl)benzonitrile (6p).**

Yield: 108.0 mg (99%). White solid, mp: 300-301 °C. <sup>1</sup>H NMR (600 MHz, CDCl<sub>3</sub>) δ 8.99 (dd, *J* = 4.3, 1.7 Hz, 1H), 8.04 (dd, *J* = 8.2, 1.7 Hz, 1H), 7.73 (dd, *J* = 8.2, 6.0 Hz, 3H), 7.60 (d, *J* = 8.4 Hz, 1H), 7.41 (s, 1H), 7.39 – 7.32 (m, 4H), 7.20 (d, *J* = 8.5 Hz, 1H), 6.79 (s, 1H), 2.52 (s, 3H), 2.18 (s, 3H). <sup>13</sup>C NMR (151 MHz, CDCl<sub>3</sub>) δ 151.1, 146.6, 142.7, 142.6, 140.1, 139.7, 135.7, 133.0, 133.0, 131.9, 130.7, 129.5, 129.4, 128.7, 128.3, 127.8, 127.2, 121.7, 121.2, 118.3, 113.0, 112.7, 21.8, 18.8. HRMS (ESI): *m/z* [M+Na]<sup>+</sup> calcd for [C<sub>26</sub>H<sub>19</sub>N<sub>3</sub>NaO<sub>2</sub>S]<sup>+</sup> requires 438.1271, found 460.1095. [α]<sub>D</sub><sup>25</sup> = +155 (c = 0.1, CH<sub>2</sub>Cl<sub>2</sub>). The product was analyzed by HPLC to determine the enantiomeric excess: 99% ee (CHIRALPAK IB-H, hexane/*i*-PrOH = 80/20, detector: 254 nm, T = 25 °C, flow rate: 1 mL/min), *t*<sub>1</sub> (minor) = 33.91 min, *t*<sub>2</sub> (major) = 40.47 min.

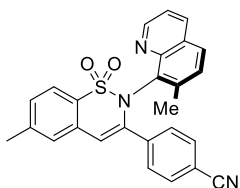



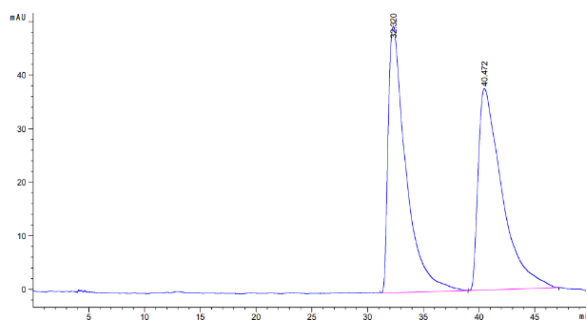

| Peak | RetTime | Area       | Height   | Area    |
|------|---------|------------|----------|---------|
| 1    | 32.320  | 5502.34570 | 49.74416 | 49.7544 |
| 2    | 40.472  | 5556.66895 | 37.61363 | 50.2456 |

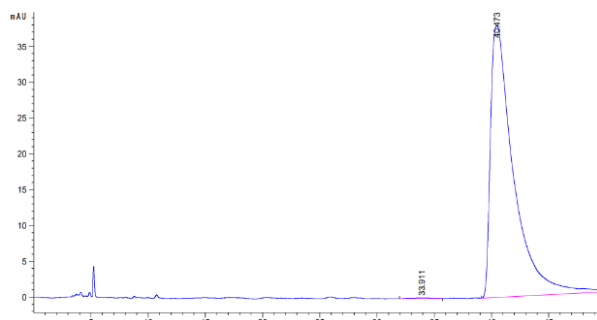

| Peak | RetTime | Area       | Height                 | Area    |
|------|---------|------------|------------------------|---------|
| 1    | 33.911  | 16.02860   | 1.22064e <sup>-1</sup> | 0.3020  |
| 2    | 40.473  | 5291.84570 | 37.90219               | 99.6980 |

**(R)-6-methyl-2-(7-methylquinolin-8-yl)-3-(m-tolyl)-2H-benzo[e][1,2]thiazine 1,1-dioxide (6q).**

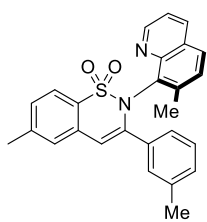

Yield: 105.3 mg (99%). White solid, mp: 204-205 °C. <sup>1</sup>H NMR (600 MHz, CDCl<sub>3</sub>)

δ 9.04 (dd, *J* = 4.3, 1.7 Hz, 1H), 8.04 – 7.97 (m, 1H), 7.72 (d, *J* = 7.9 Hz, 1H), 7.59 – 7.52 (m, 1H), 7.48 (s, 1H), 7.41 – 7.32 (m, 3H), 7.28 (d, *J* = 8.1 Hz, 1H), 7.17 – 7.12 (m, 1H), 6.93 (dt, *J* = 14.2, 7.5 Hz, 2H), 6.74 (s, 1H), 2.50 (s, 3H), 2.13 (s, 3H),

2.06 (s, 3H). <sup>13</sup>C NMR (151 MHz, CDCl<sub>3</sub>) δ 150.9, 147.0, 144.7, 142.2, 139.6, 137.5, 135.7, 135.4, 133.7, 133.7, 130.4, 130.0, 129.5, 128.7, 128.5, 128.3, 127.8, 127.4, 127.1, 124.9, 121.5, 120.9, 111.0, 21.7, 21.0, 18.7. HRMS (ESI): *m/z* [M+H]<sup>+</sup> calcd for [C<sub>26</sub>H<sub>23</sub>N<sub>2</sub>O<sub>2</sub>S]<sup>+</sup> requires 427.1475, found 427.1474. [α]<sub>D</sub><sup>25</sup> = +39 (c = 0.1, CH<sub>2</sub>Cl<sub>2</sub>). The product was analyzed by HPLC to determine the enantiomeric excess: 99% ee (CHIRALPAK IB-H, hexane/*i*-PrOH = 80/20, detector: 254 nm, T = 25 °C, flow rate: 1 mL/min), *t*<sub>1</sub> (minor) = 20.02 min, *t*<sub>2</sub> (major) = 25.50 min.

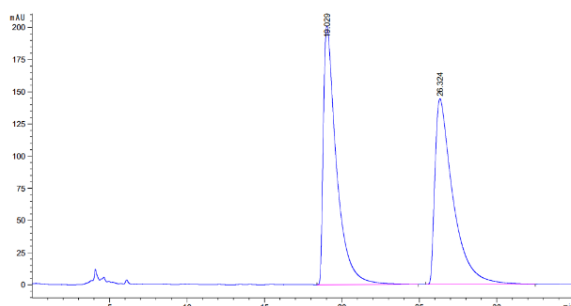

| Peak | RetTime | Area      | Height    | Area    |
|------|---------|-----------|-----------|---------|
| 1    | 19.029  | 1.18268e4 | 200.93001 | 50.3094 |
| 2    | 26.324  | 1.16814e4 | 144.32545 | 49.6906 |

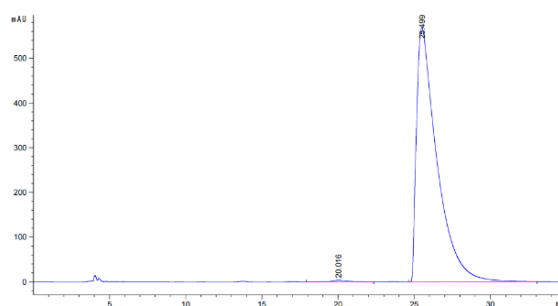

| Peak | RetTime | Area      | Height    | Area    |
|------|---------|-----------|-----------|---------|
| 1    | 20.016  | 247.54741 | 3.65792   | 0.4658  |
| 2    | 25.499  | 5.29012e4 | 568.72900 | 99.5342 |

**(R)-6-methyl-2-(7-methylquinolin-8-yl)-3-(o-tolyl)-2H-benzo[e][1,2]thiazine 1,1-dioxide (6r).**

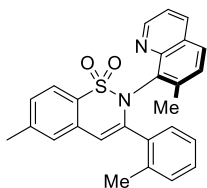

Yield: 45.8 mg (43%). White solid, mp: 240-241 °C. <sup>1</sup>H NMR (600 MHz, CDCl<sub>3</sub>) δ 8.54 (dd, *J* = 4.2, 1.8 Hz, 1H), 7.97 – 7.92 (m, 1H), 7.72 (d, *J* = 7.9 Hz, 1H), 7.54 (dd, *J* = 8.5, 2.4 Hz, 1H), 7.36 – 7.29 (m, 2H), 7.25 – 7.18 (m, 2H), 7.06 – 6.98 (m, 2H), 6.90 (s, 1H), 6.76 (d, *J* = 6.3 Hz, 1H), 6.48 (s, 1H), 2.52 (s, 3H), 2.48 (s, 3H),

2.45 (s, 3H). <sup>13</sup>C NMR (151 MHz, CDCl<sub>3</sub>) δ 150.4, 146.7, 143.1, 142.0, 141.5, 137.9, 135.3, 135.1, 133.6, 132.9, 130.0, 129.5, 129.2, 128.6, 128.5, 128.3, 127.2, 127.0, 124.5, 121.3, 120.8, 113.1, 21.8, 19.6, 19.3. HRMS (ESI): *m/z* [M+H]<sup>+</sup> calcd for [C<sub>26</sub>H<sub>23</sub>N<sub>2</sub>O<sub>2</sub>S]<sup>+</sup> requires 427.1475, found 427.1477. [α]<sub>D</sub><sup>25</sup> = -220 (c = 0.1, CH<sub>2</sub>Cl<sub>2</sub>). The product was analyzed by HPLC to determine the enantiomeric excess: 99% ee (CHIRALPAK IB-H, hexane/*i*-PrOH = 80/20, detector: 254 nm, T = 25 °C, flow rate: 1 mL/min), *t*<sub>1</sub> (minor) = 11.78 min, *t*<sub>2</sub> (major) = 13.32 min.

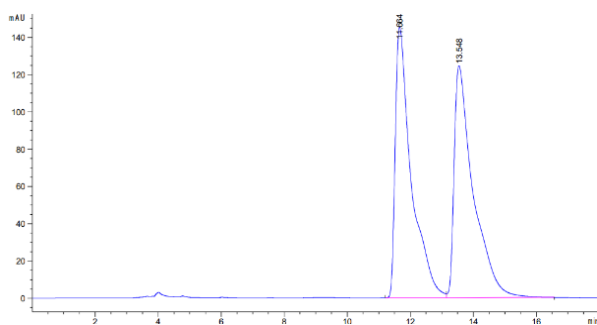

| Peak | RetTime | Area       | Height    | Area    |
|------|---------|------------|-----------|---------|
| 1    | 11.664  | 5120.18750 | 145.21574 | 49.4608 |
| 2    | 13.548  | 5231.83203 | 124.45634 | 50.5392 |

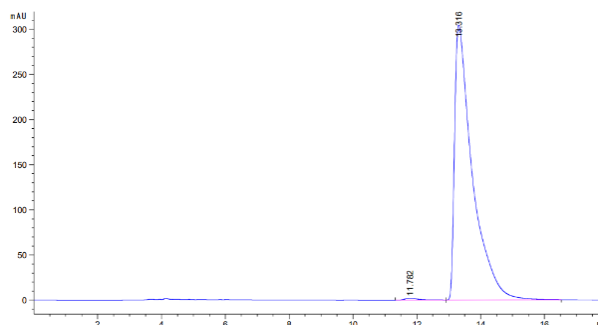

| Peak | RetTime | Area      | Height    | Area    |
|------|---------|-----------|-----------|---------|
| 1    | 11.780  | 66.77655  | 2.16046   | 0.5629  |
| 2    | 13.316  | 1.17954e4 | 304.05023 | 99.4371 |

**(R)-6-methyl-2-(7-methylquinolin-8-yl)-3-(pyridin-4-yl)-2H-benzo[e][1,2]thiazine 1,1-dioxide (6s).**

Yield: 73.1 mg (71%). White solid, mp: 217-218 °C. <sup>1</sup>H NMR (600 MHz, CDCl<sub>3</sub>) δ 8.96 (dd, *J* = 4.2,

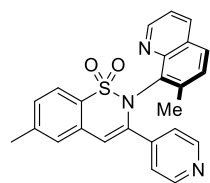

1.7 Hz, 1H), 8.40 – 8.30 (s, 2H), 8.01 (dd, *J* = 8.3, 1.8 Hz, 1H), 7.72 (d, *J* = 7.9 Hz, 1H), 7.58 (d, *J* = 8.4 Hz, 1H), 7.49 (s, 2H), 7.40 (s, 1H), 7.36 – 7.30 (m, 2H), 7.18 (d, *J* = 8.4 Hz, 1H), 6.83 (s, 1H), 2.50 (s, 3H), 2.19 (s, 3H). <sup>13</sup>C NMR (151 MHz, CDCl<sub>3</sub>) δ 151.1, 149.7, 146.6, 143.2, 142.6, 142.1, 139.8, 135.7, 133.0, 132.9, 130.7, 129.5, 129.5, 128.8, 127.9, 127.2, 122.1, 121.6, 121.6, 121.1, 113.1, 21.7, 18.8. HRMS (ESI): *m/z* [M+H]<sup>+</sup> calcd for [C<sub>24</sub>H<sub>20</sub>N<sub>3</sub>O<sub>2</sub>S]<sup>+</sup> requires 414.1271, found 414.1279. [α]<sub>D</sub><sup>25</sup> = +57 (c = 0.1, CH<sub>2</sub>Cl<sub>2</sub>). The product was analyzed by HPLC to determine the enantiomeric excess: 99% ee (CHIRALPAK IB-H, hexane/*i*-

PrOH = 80/20, detector: 254 nm, T = 25 °C, flow rate: 1 mL/min, t<sub>1</sub> (minor) = 36.48 min, t<sub>2</sub> (major) = 46.58 min.

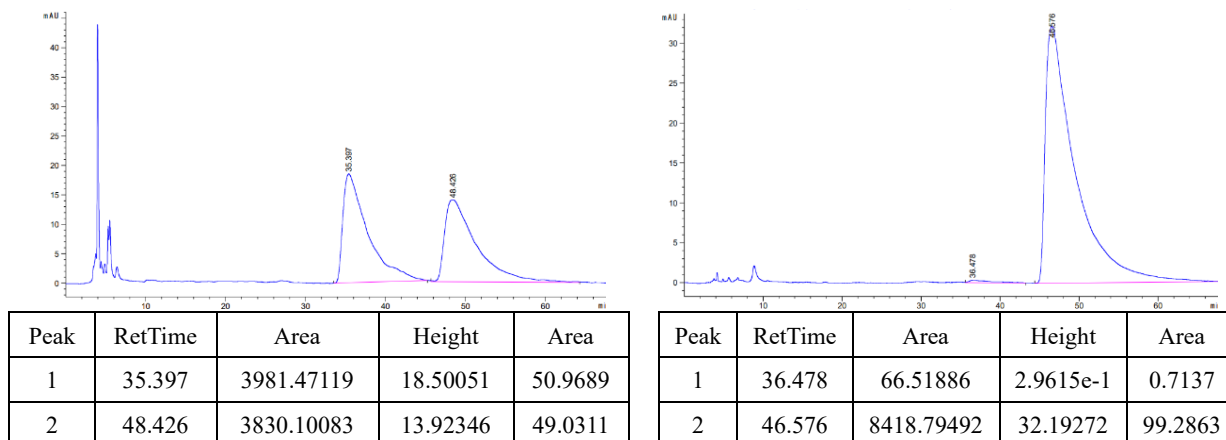

**(R)-6-methyl-2-(7-methylquinolin-8-yl)-3-(thiophen-3-yl)-2H-benzo[e][1,2]thiazine 1,1-dioxide (6t).**

Yield: 99.3 mg (95%). White solid, mp: 237-238 °C. <sup>1</sup>H NMR (600 MHz, CDCl<sub>3</sub>) δ 9.04 – 8.97 (m,

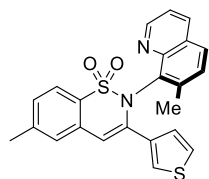

1H), 8.09 – 7.97 (m, 1H), 7.70 (d, J = 7.9 Hz, 1H), 7.64 – 7.56 (m, 1H), 7.46 – 7.31 (m, 3H), 7.29 – 7.23 (m, 1H), 7.24 – 7.15 (m, 2H), 7.02 – 6.94 (m, 1H), 6.79 (s, 1H), 2.48 (s, 3H), 2.12 (s, 3H). <sup>13</sup>C NMR (151 MHz, CDCl<sub>3</sub>) δ 151.2, 147.0, 142.3,

139.7, 139.3, 137.3, 135.7, 133.7, 133.5, 130.4, 129.6, 128.4, 128.4, 127.4, 127.2, 126.9, 125.4, 125.0,

121.4, 121.0, 110.3, 21.8, 18.6. HRMS (ESI): m/z [M+H]<sup>+</sup> calcd for [C<sub>23</sub>H<sub>19</sub>N<sub>2</sub>O<sub>2</sub>S<sub>2</sub>]<sup>+</sup> requires

419.0882, found 419.0885. [α]<sub>D</sub><sup>25</sup> = +34 (c = 0.1, CH<sub>2</sub>Cl<sub>2</sub>). The product was analyzed by HPLC to

determine the enantiomeric excess: 99% ee (CHIRALPAK IB-H, hexane/*i*-PrOH = 80/20, detector:

254 nm, T = 25 °C, flow rate: 1 mL/min), t<sub>1</sub> (major) = 48.78 min, t<sub>2</sub> (minor) = 91.64 min.

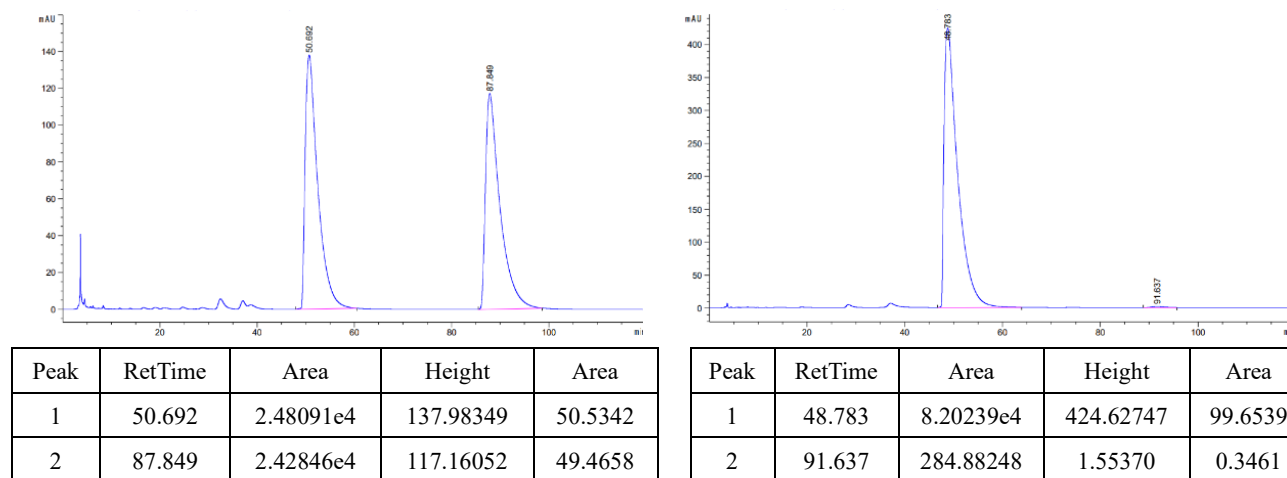

**(R)-3-(cyclohex-1-en-1-yl)-6-methyl-2-(7-methylquinolin-8-yl)-2H-benzo[e][1,2]thiazine 1,1-**

**dioxide (6u).**

Yield: 98.8 mg (95%). White solid, mp: 196-197 °C. <sup>1</sup>H NMR (600 MHz, CDCl<sub>3</sub>) δ 8.86 (dd, *J* = 4.2,

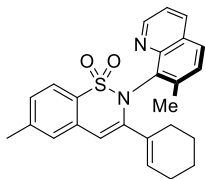

1.7 Hz, 1H), 8.06 (dd, *J* = 8.2, 1.7 Hz, 1H), 7.67 (d, *J* = 8.4 Hz, 1H), 7.64 (d, *J* = 7.9 Hz, 1H), 7.35 – 7.29 (m, 2H), 7.29 (s, 1H), 7.21 (d, *J* = 7.9 Hz, 1H), 6.54 (s, 1H), 6.09 (t, *J* = 1.8 Hz, 1H), 2.47 (s, 3H), 2.21 (s, 3H), 2.12 – 2.02 (m, 2H), 1.82

(dd, *J* = 18.8, 4.2 Hz, 1H), 1.74 – 1.64 (m, 1H), 1.39 – 1.32 (m, 1H), 1.31 – 1.23 (m, 3H). <sup>13</sup>C NMR (151 MHz, CDCl<sub>3</sub>) δ 150.7, 146.8, 146.7, 142.0, 139.7, 135.3, 134.0, 133.9, 133.6, 130.9, 130.3, 129.5, 128.0, 128.0, 127.2, 127.1, 121.4, 120.8, 108.9, 26.8, 25.4, 22.4, 21.7, 21.6, 18.9. HRMS (ESI): *m/z* [M+H]<sup>+</sup> calcd for [C<sub>25</sub>H<sub>25</sub>N<sub>2</sub>O<sub>2</sub>S]<sup>+</sup> requires 417.1631, found 417.1638. [α]<sub>D</sub><sup>25</sup> = -56 (c = 0.1, CH<sub>2</sub>Cl<sub>2</sub>).

The product was analyzed by HPLC to determine the enantiomeric excess: 99% ee (CHIRALPAK IB-H, hexane/*i*-PrOH = 80/20, detector: 254 nm, T = 25 °C, flow rate: 1 mL/min), *t*<sub>1</sub> (minor) = 14.21 min, *t*<sub>2</sub> (major) = 16.66 min.

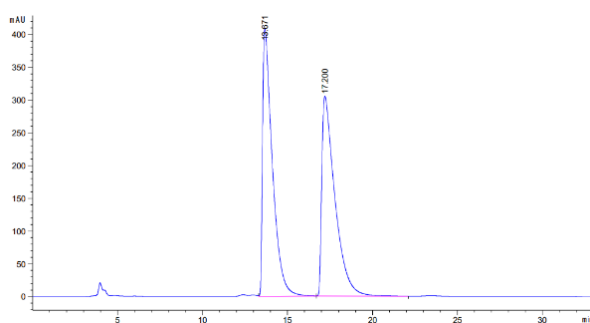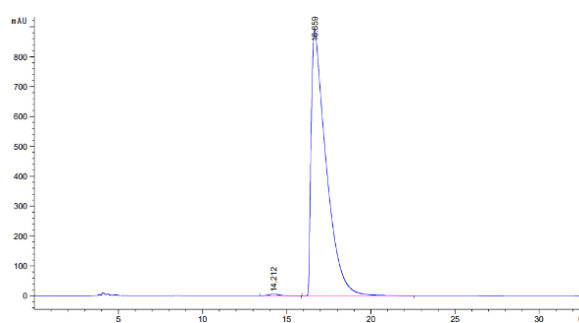

| Peak | RetTime | Area      | Height    | Area    |
|------|---------|-----------|-----------|---------|
| 1    | 13.671  | 1.63305e4 | 408.32181 | 49.8998 |
| 2    | 17.200  | 1.63961e4 | 305.16980 | 50.1002 |

| Peak | RetTime | Area      | Height    | Area    |
|------|---------|-----------|-----------|---------|
| 1    | 14.212  | 231.82561 | 5.37188   | 0.4208  |
| 2    | 16.659  | 5.48655e4 | 889.26837 | 99.5792 |

**(R)-3-(3-hydroxypropyl)-6-methyl-2-(7-methylquinolin-8-yl)-2H-benzo[e][1,2]thiazine 1,1-****dioxide (6v).**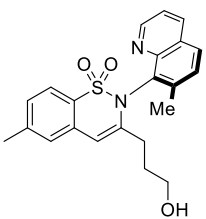

Yield: 84.7 mg (86%). White solid, mp: 100-101 °C. <sup>1</sup>H NMR (600 MHz, CDCl<sub>3</sub>) δ 8.83 (dd, *J* = 4.3, 1.8 Hz, 1H), 8.09 (dd, *J* = 8.3, 1.8 Hz, 1H), 7.74 (d, *J* = 8.4 Hz, 1H), 7.66 (d, *J* = 8.3 Hz, 1H), 7.38 (d, *J* = 8.4 Hz, 1H), 7.33 (dd, *J* = 8.2, 4.2 Hz, 1H), 7.22 (s, 2H), 6.44 (s, 1H), 3.67 – 3.59 (m, 1H), 3.53 – 3.44 (m, 1H), 2.95 (s,

1H), 2.44 (s, 3H), 2.24 – 2.18 (m, 1H), 2.17 (s, 3H), 2.13 – 2.06 (m, 1H), 1.79 – 1.66 (m, 2H). <sup>13</sup>C NMR (151 MHz, CDCl<sub>3</sub>) δ 151.4, 147.0, 144.0, 142.2, 141.1, 136.0, 133.5, 132.0, 129.7, 129.6, 128.9, 128.0, 127.5, 126.9, 121.3, 121.1, 109.3, 61.0, 31.1, 29.6, 21.7, 18.6. HRMS (ESI): *m/z* [M+H]<sup>+</sup> calcd

for  $[C_{22}H_{23}N_2O_3S]^+$  requires 395.1424, found 395.1435.  $[\alpha]_D^{25} = -76$  ( $c = 0.1$ ,  $CH_2Cl_2$ ). The product was analyzed by HPLC to determine the enantiomeric excess: 99% ee (CHIRALPAK IB-H, hexane/*i*-PrOH = 80/20, detector: 254 nm,  $T = 25$  °C, flow rate: 1 mL/min),  $t_1$  (minor) = 22.21 min,  $t_2$  (major) = 24.01 min.

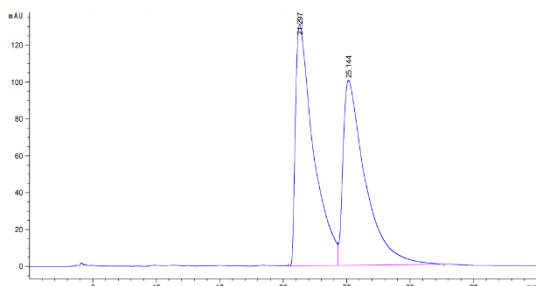

| Peak | RetTime | Area      | Height    | Area    |
|------|---------|-----------|-----------|---------|
| 1    | 21.297  | 1.28689e4 | 130.97375 | 51.3967 |
| 2    | 25.144  | 1.21695e4 | 100.36426 | 48.6033 |

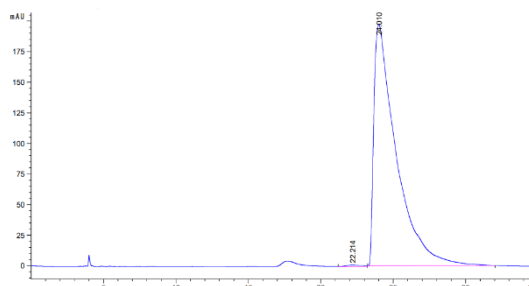

| Peak | RetTime | Area      | Height    | Area    |
|------|---------|-----------|-----------|---------|
| 1    | 22.214  | 107.82291 | 1.33824   | 0.5072  |
| 2    | 24.010  | 2.11527e4 | 197.14571 | 99.4928 |

**(*R*)-3-cyclopropyl-6-methyl-2-(7-methylquinolin-8-yl)-2*H*-benzo[e][1,2]thiazine 1,1-dioxide (6w).**

Yield: 50.4 mg (54%). White solid, mp: 87-88 °C.  $^1H$  NMR (600 MHz,  $CDCl_3$ )  $\delta$

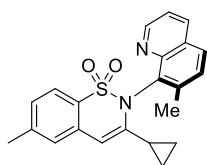

8.75 (dd,  $J = 4.2, 1.7$  Hz, 1H), 8.09 (dd,  $J = 8.3, 1.8$  Hz, 1H), 7.76 (d,  $J = 8.3$  Hz, 1H), 7.69 (d,  $J = 8.3$  Hz, 1H), 7.46 (d,  $J = 8.4$  Hz, 1H), 7.30 (dd,  $J = 8.2, 4.2$  Hz, 1H), 7.21 (s, 2H), 6.20 (s, 1H) 2.45 (s, 3H), 2.41 (s, 3H), 1.34 (td,  $J = 8.4, 4.3$  Hz, 1H), 0.54 –

0.48 (m, 1H), 0.45 (dq,  $J = 9.7, 5.1$  Hz, 1H), 0.41 – 0.30 (m, 2H).  $^{13}C$  NMR (151 MHz,  $CDCl_3$ )  $\delta$  151.2, 147.0, 146.1, 141.9, 141.5, 135.6, 133.7, 132.6, 129.5, 129.3, 128.8, 127.6, 127.4, 126.8, 121.1, 121.0, 104.5, 21.7, 19.0, 14.2, 7.1, 6.0. HRMS (ESI):  $m/z$   $[M+H]^+$  calcd for  $[C_{22}H_{21}N_2O_2S]^+$  requires 377.1318, found 377.1319.  $[\alpha]_D^{25} = -80$  ( $c = 0.1$ ,  $CH_2Cl_2$ ). The product was analyzed by HPLC to determine the enantiomeric excess: >99% ee (CHIRALPAK IB-H, hexane/*i*-PrOH = 80/20, detector: 254 nm,  $T = 25$  °C, flow rate: 1 mL/min),  $t_1$  (minor) = 18.99 min,  $t_2$  (major) = 20.06 min.

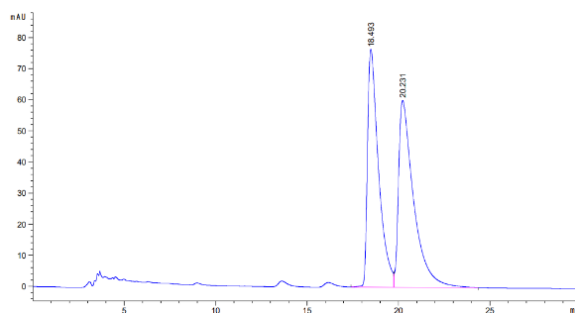

| Peak | RetTime | Area       | Height   | Area    |
|------|---------|------------|----------|---------|
| 1    | 18.493  | 3207.85522 | 76.49994 | 48.2861 |

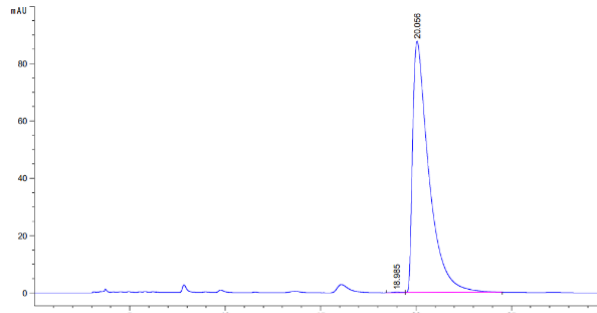

| Peak | RetTime | Area    | Height                 | Area   |
|------|---------|---------|------------------------|--------|
| 1    | 18.985  | 6.28946 | 1.83030e <sup>-1</sup> | 0.1211 |

|   |        |            |          |         |
|---|--------|------------|----------|---------|
| 2 | 20.231 | 3435.58521 | 60.10282 | 51.7139 |
|---|--------|------------|----------|---------|

|   |        |            |          |         |
|---|--------|------------|----------|---------|
| 2 | 20.056 | 5187.70801 | 87.58326 | 99.8789 |
|---|--------|------------|----------|---------|

**(R)-3,4-dibutyl-6-methyl-2-(7-methylquinolin-8-yl)-2H-benzo[1,2]thiazine-1,1-dioxide (5aj).**

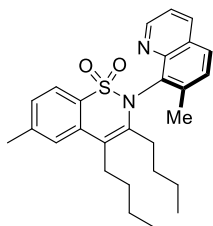

Yield: 47.8 mg (43%). White solid, mp: 198-199 °C. <sup>1</sup>H NMR (600 MHz, CDCl<sub>3</sub>)

δ 8.82 (dd, *J* = 4.2, 1.8 Hz, 1H), 8.08 (dd, *J* = 8.3, 1.8 Hz, 1H), 7.71 (d, *J* = 8.3 Hz, 1H), 7.66 (d, *J* = 7.9 Hz, 1H), 7.44 (s, 1H), 7.36 (d, *J* = 8.4 Hz, 1H), 7.32 (dd, *J* = 8.2, 4.2 Hz, 1H), 7.22 (dd, *J* = 8.0, 1.5 Hz, 1H), 2.77 – 2.66 (m, 2H), 2.51 (s, 3H),

2.15 (s, 4H), 1.96 (ddd, *J* = 14.2, 11.4, 4.8 Hz, 1H), 1.67 – 1.59 (m, 4H), 1.48 (hd, *J* = 7.0, 2.1 Hz, 2H), 1.42 – 1.33 (m, 1H), 1.12 – 1.04 (m, 1H), 1.03 – 0.95 (m, 4H), 0.58 (t, *J* = 7.4 Hz, 3H). <sup>13</sup>C NMR (151 MHz, CDCl<sub>3</sub>) δ 150.9, 147.1, 141.4, 140.5, 139.9, 135.4, 134.7, 133.1, 131.9, 129.4, 128.3, 127.6, 127.3, 124.7, 121.3, 121.0, 120.5, 32.2, 30.7, 30.5, 28.2, 23.0, 22.6, 22.1, 18.6, 14.0, 13.3. HRMS (ESI): *m/z* [M+H]<sup>+</sup> calcd for [C<sub>27</sub>H<sub>32</sub>N<sub>2</sub>O<sub>2</sub>S]<sup>+</sup> requires 449.2257, found 449.2266. [α]<sub>D</sub><sup>25</sup> = -282 (*c* = 0.1, CH<sub>2</sub>Cl<sub>2</sub>). The product was analyzed by HPLC to determine the enantiomeric excess: 99% ee (CHIRALPAK IB-H, hexane/*i*-PrOH = 80/20, detector: 254 nm, T = 25 °C, flow rate: 1 mL/min), *t*<sub>1</sub> (minor) = 7.40 min, *t*<sub>2</sub> (major) = 8.46 min.

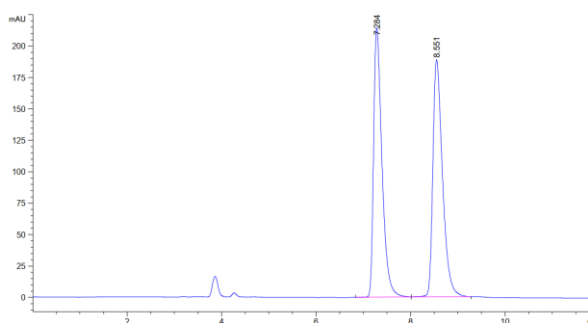

| Peak | RetTime | Area       | Height    | Area    |
|------|---------|------------|-----------|---------|
| 1    | 7.284   | 2634.91602 | 214.28548 | 49.6896 |
| 2    | 8.551   | 2667.83032 | 188.52023 | 50.3104 |

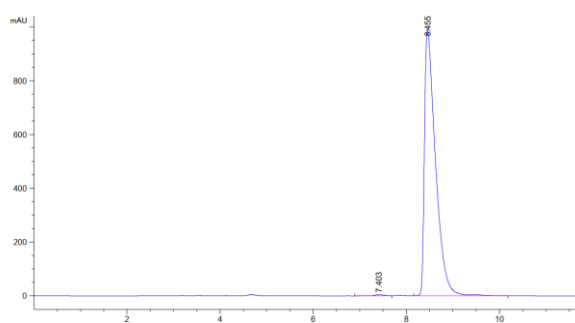

| Peak | RetTime | Area                  | Height    | Area    |
|------|---------|-----------------------|-----------|---------|
| 1    | 7.403   | 57.91543              | 4.52758   | 0.3545  |
| 2    | 8.455   | 1.62777e <sup>4</sup> | 991.35419 | 99.6455 |

**(R)-4,6-dimethyl-2-(7-methylquinolin-8-yl)-3-phenyl-2H-benzo[e][1,2]thiazine 1,1-dioxide (6x).**

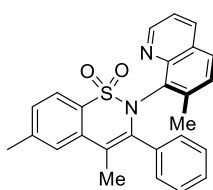

Yield: 37.1 mg (35%). Colorless oil. <sup>1</sup>H NMR (600 MHz, CDCl<sub>3</sub>) δ 8.79 (dd, *J* =

4.2, 1.8 Hz, 1H), 7.92 (dd, *J* = 8.2, 1.8 Hz, 1H), 7.73 (d, *J* = 7.9 Hz, 1H), 7.55 (s, 1H), 7.48 (d, *J* = 8.4 Hz, 1H), 7.41 – 7.29 (m, 3H), 7.27 – 7.23 (m, 1H), 7.13 (d, *J* = 8.4 Hz, 1H), 7.08 – 6.95 (m, 1H), 2.55 (s, 3H), 2.26 (s, 3H), 2.23 (s, 3H). <sup>13</sup>C

NMR (151 MHz, CDCl<sub>3</sub>) δ 150.5, 146.6, 141.8, 139.9, 139.7, 136.0, 135.2, 135.1, 133.4, 131.2, 129.6, 129.1, 128.4, 128.2, 128.0, 127.3, 126.9, 125.3, 121.3, 120.6, 116.0, 22.1, 19.0, 16.3. HRMS (ESI):

$m/z$   $[M+H]^+$  calcd for  $[C_{26}H_{23}N_2O_2S]^+$  requires 427.1475, found 427.1475.  $[\alpha]_D^{25} = +154$  ( $c = 0.1$ ,  $CH_2Cl_2$ ). The product was analyzed by HPLC to determine the enantiomeric excess: 99% ee (CHIRALPAK IB-H, hexane/*i*-PrOH = 80/20, detector: 254 nm,  $T = 25$  °C, flow rate: 1 mL/min),  $t_1$  (minor) = 11.30 min,  $t_2$  (major) = 13.31 min.

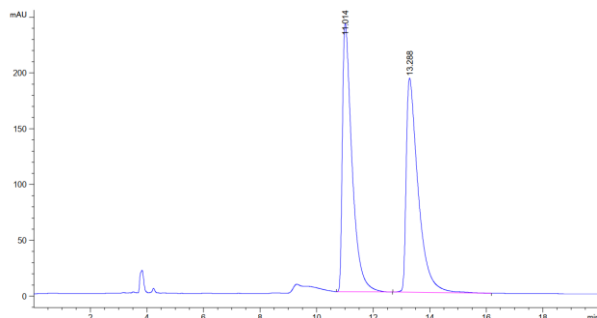

| Peak | RetTime | Area       | Height    | Area    |
|------|---------|------------|-----------|---------|
| 1    | 11.014  | 5668.95752 | 240.40921 | 50.1206 |
| 2    | 13.288  | 5641.67285 | 191.77019 | 49.8794 |

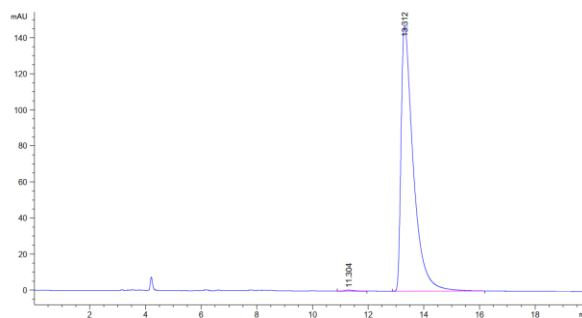

| Peak | RetTime | Area       | Height          | Area    |
|------|---------|------------|-----------------|---------|
| 1    | 11.304  | 15.97842   | $5.95117e^{-1}$ | 0.3560  |
| 2    | 13.312  | 4471.96191 | 147.55960       | 99.6440 |

**(R)-2-(7-ethylquinolin-8-yl)-6-methyl-3-phenyl-2H-benzo[e][1,2]thiazine 1,1-dioxide (6y).**

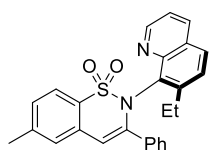

Yield: 86.1 mg (81%). White solid, mp: 208-209 °C.  $^1H$  NMR (600 MHz,  $CDCl_3$ )  $\delta$

8.93 (dd,  $J = 4.2, 1.7$  Hz, 1H), 7.99 (dd,  $J = 8.2, 1.8$  Hz, 1H), 7.69 (d,  $J = 7.9$  Hz, 1H), 7.64 – 7.54 (m, 3H), 7.39 (s, 1H), 7.36 – 7.30 (m, 1H), 7.28 (dd,  $J = 8.1, 1.6$  Hz,

1H), 7.25 (d,  $J = 5.7$  Hz, 1H), 7.15 – 7.08 (m, 1H), 7.04 (dd,  $J = 8.2, 6.9$  Hz, 2H), 6.70 (s, 1H), 2.63 (dq,  $J = 15.1, 7.6$  Hz, 1H), 2.56 (dq,  $J = 14.9, 7.6$  Hz, 1H), 2.51 (s, 3H), 1.06 (t,  $J = 7.6$  Hz, 3H).  $^{13}C$

NMR (151 MHz,  $CDCl_3$ )  $\delta$  150.8, 146.9, 145.5, 145.1, 142.1, 135.9, 135.4, 133.8, 132.5, 129.9, 129.1, 128.7, 128.5, 128.1, 127.8, 127.5, 127.4, 127.0, 121.6, 121.6, 120.9, 111.1, 24.5, 21.8, 14.3. HRMS

(ESI):  $m/z$   $[M+H]^+$  calcd for  $[C_{26}H_{23}N_2O_2S]^+$  requires 427.1475, found 427.1477.  $[\alpha]_D^{25} = +139$  ( $c = 0.1$ ,  $CH_2Cl_2$ ). The product was analyzed by HPLC to determine the enantiomeric excess: 99% ee (CHIRALPAK IB-H, hexane/*i*-PrOH = 80/20, detector: 254 nm,  $T = 25$  °C, flow rate: 1 mL/min),  $t_1$  (minor) = 21.85 min,  $t_2$  (major) = 25.18 min.

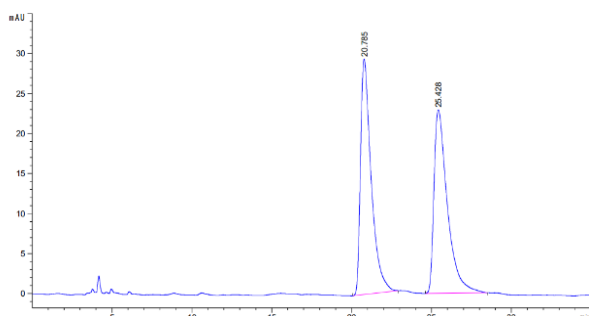

| Peak | RetTime | Area       | Height   | Area    |
|------|---------|------------|----------|---------|
| 1    | 20.785  | 1362.69092 | 29.41368 | 50.4919 |
| 2    | 25.428  | 1336.13818 | 22.92377 | 49.5081 |

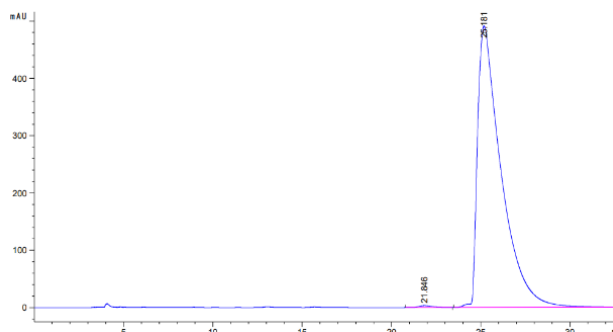

| Peak | RetTime | Area      | Height    | Area    |
|------|---------|-----------|-----------|---------|
| 1    | 21.846  | 163.70512 | 3.23367   | 0.3625  |
| 2    | 25.181  | 4.49961e4 | 491.40109 | 99.6375 |

**(R)-2-(7-butylquinolin-8-yl)-6-methyl-3-phenyl-2H-benzo[e][1,2]thiazine 1,1-dioxide (6z).**

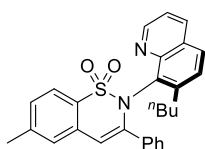

Yield: 90.6 mg (80%). White solid, mp: 200-201 °C. <sup>1</sup>H NMR (600 MHz, CDCl<sub>3</sub>) δ 9.07 (dd, *J* = 4.3, 1.7 Hz, 1H), 7.97 (dd, *J* = 8.2, 1.8 Hz, 1H), 7.71 (d, *J* = 7.9 Hz, 1H), 7.63 (d, *J* = 6.9 Hz, 2H), 7.54 (d, *J* = 8.5 Hz, 1H), 7.38 (s, 1H), 7.34 (dd, *J* = 8.2, 4.2 Hz, 1H), 7.28 (dd, *J* = 8.0, 1.6 Hz, 1H), 7.15 (d, *J* = 8.5 Hz, 1H), 7.12 – 7.07 (m, 1H), 7.03 (t, *J* = 7.6 Hz, 2H), 6.72 (s, 1H), 2.48 (s, 3H), 2.43 – 2.34 (m, 1H), 2.34 – 2.26 (m, 1H), 1.36 – 1.28 (m, 1H), 1.27 – 1.18 (m, 1H), 1.09 – 0.98 (m, 1H), 0.91 – 0.80 (m, 1H), 0.66 (t, *J* = 7.4 Hz, 3H). <sup>13</sup>C NMR (151 MHz, CDCl<sub>3</sub>) δ 150.9, 147.2, 145.1, 144.3, 142.2, 135.8, 135.5, 133.6, 132.7, 130.1, 129.2, 128.6, 128.6, 128.2, 128.1, 127.9, 127.4, 127.0, 121.6, 121.0, 111.2, 32.9, 31.4, 23.0, 21.7, 13.7. HRMS (ESI): *m/z* [M+H]<sup>+</sup> calcd for [C<sub>28</sub>H<sub>27</sub>N<sub>2</sub>O<sub>2</sub>S]<sup>+</sup> requires 455.1788, found 455.1786. [α]<sub>D</sub><sup>25</sup> = +132 (c = 0.1, CH<sub>2</sub>Cl<sub>2</sub>). The product was analyzed by HPLC to determine the enantiomeric excess: 99% ee (CHIRALPAK IB-H, hexane/*i*-PrOH = 80/20, detector: 254 nm, T = 25 °C, flow rate: 1 mL/min), *t*<sub>1</sub> (minor) = 23.17 min, *t*<sub>2</sub> (major) = 25.57 min.

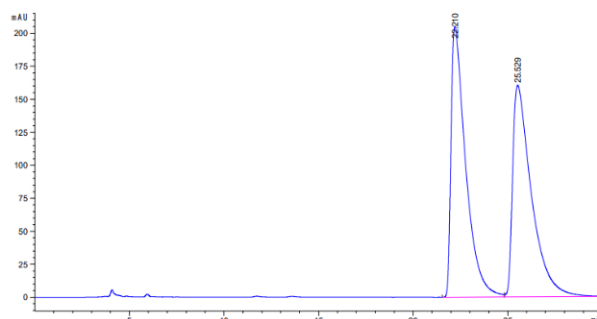

| Peak | RetTime | Area      | Height    | Area    |
|------|---------|-----------|-----------|---------|
| 1    | 22.21   | 1.10280e4 | 205.11058 | 49.8773 |
| 2    | 25.529  | 1.10822e4 | 160.40794 | 50.1227 |

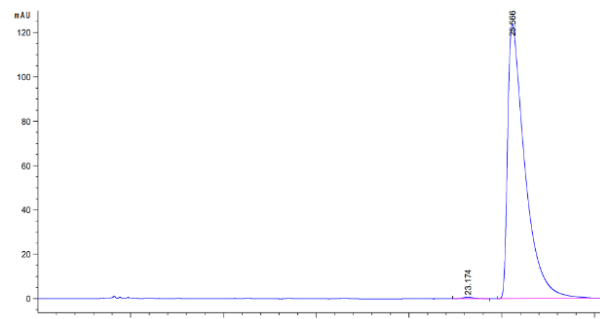

| Peak | RetTime | Area       | Height     | Area    |
|------|---------|------------|------------|---------|
| 1    | 23.174  | 29.86735   | 6.27136e-1 | 0.3722  |
| 2    | 25.566  | 7993.88281 | 123.73645  | 99.6278 |



**(R)-6-methyl-3-phenyl-2-(7-phenylquinolin-8-yl)-2H-benzo[e][1,2]thiazine 1,1-dioxide (6za).**

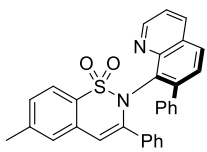

Yield: 71.2 mg (60%). White solid, mp: 160-161 °C. <sup>1</sup>H NMR (600 MHz, CDCl<sub>3</sub>)

δ 9.33 (dd, *J* = 4.3, 1.7 Hz, 1H), 8.13 (dd, *J* = 8.3, 1.8 Hz, 1H), 7.82 (d, *J* = 7.9 Hz, 1H), 7.65 (d, *J* = 8.3 Hz, 1H), 7.51 (dd, *J* = 8.3, 4.2 Hz, 1H), 7.34 (dd, *J* = 8.0, 1.6

Hz, 1H), 7.26 – 7.22 (m, 2H), 7.13 (d, *J* = 8.3 Hz, 1H), 7.11 – 7.04 (m, 2H), 6.97 (t, *J* = 7.6 Hz, 2H),

6.91 (s, 1H), 6.79 (t, *J* = 7.4 Hz, 2H), 6.71 (d, *J* = 7.5 Hz, 2H), 6.09 (s, 1H), 2.47 (s, 3H). <sup>13</sup>C NMR

(151 MHz, CDCl<sub>3</sub>) δ 151.7, 147.1, 143.2, 142.2, 141.9, 137.8, 135.7, 135.5, 133.6, 133.2, 129.6, 129.1,

128.9, 128.6, 128.3, 128.1, 128.0, 127.9, 127.6, 127.5, 127.3, 127.0, 122.2, 121.7, 111.7, 21.6. HRMS

(ESI): *m/z* [M+H]<sup>+</sup> calcd for [C<sub>30</sub>H<sub>23</sub>N<sub>2</sub>O<sub>2</sub>S]<sup>+</sup> requires 475.1475, found 475.1485. [α]<sub>D</sub><sup>25</sup> = +128 (c =

0.1, CH<sub>2</sub>Cl<sub>2</sub>). The product was analyzed by HPLC to determine the enantiomeric excess: >99% ee

(CHIRALPAK IB-H, hexane/*i*-PrOH = 80/20, detector: 254 nm, T = 25 °C, flow rate: 1 mL/min), *t*<sub>1</sub>

(major) = 29.07 min, *t*<sub>2</sub> (minor) = 40.94 min.

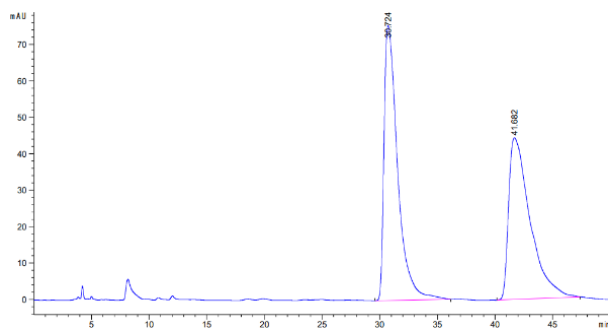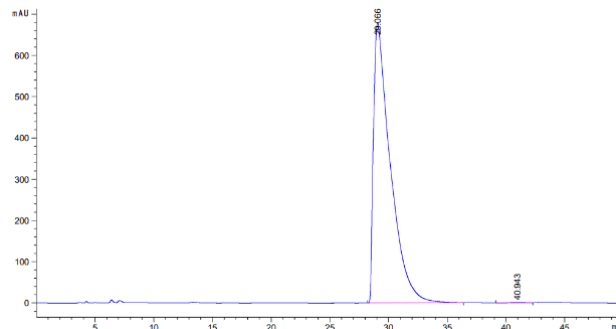

| Peak | RetTime | Area       | Height   | Area    |
|------|---------|------------|----------|---------|
| 1    | 30.724  | 6164.22949 | 75.37975 | 51.8618 |
| 2    | 41.682  | 5721.65576 | 44.38799 | 48.1382 |

| Peak | RetTime | Area      | Height    | Area    |
|------|---------|-----------|-----------|---------|
| 1    | 29.066  | 6.74213e4 | 678.82184 | 99.7977 |
| 2    | 40.943  | 136.66936 | 1.43888   | 0.2023  |

**(R)-2-(7-(4-methoxyphenyl)quinolin-8-yl)-6-methyl-3-phenyl-2H-benzo[e][1,2]thiazine 1,1-**

**dioxide (6zb).**

Yield: 57.1 mg (45%). White solid, mp: 107-108 °C. <sup>1</sup>H NMR (600 MHz, CDCl<sub>3</sub>) δ 9.33 (dd, *J* = 4.2,

1.8 Hz, 1H), 8.13 (dd, *J* = 8.3, 1.8 Hz, 1H), 7.82 (d, *J* = 7.9 Hz, 1H), 7.65 (d, *J* =

8.4 Hz, 1H), 7.52 (dd, *J* = 8.3, 4.2 Hz, 1H), 7.36 (ddd, *J* = 8.0, 1.7, 0.8 Hz, 1H),

7.27 – 7.22 (m, 2H), 7.13 (d, *J* = 8.3 Hz, 1H), 7.10 – 7.04 (m, 1H), 7.00 – 6.93 (m,

3H), 6.67 – 6.62 (m, 2H), 6.32 (d, *J* = 8.0 Hz, 2H), 6.14 (s, 1H), 3.70 (s, 3H), 2.48 (s, 3H). <sup>13</sup>C NMR

(151 MHz, CDCl<sub>3</sub>) δ 159.0, 151.6, 147.2, 143.5, 142.0, 141.6, 135.7, 135.6, 133.8, 133.3, 130.3, 129.3,

129.2, 128.9, 128.5, 128.2, 128.1, 127.8, 127.6, 127.4, 122.3, 121.6, 112.4, 111.5, 55.1, 21.6. HRMS

(ESI):  $m/z$   $[M+H]^+$  calcd for  $[C_{31}H_{25}N_2O_3S]^+$  requires 505.1580, found 505.1591.  $[\alpha]_D^{25} = +334$  ( $c = 0.1$ ,  $CH_2Cl_2$ ). The product was analyzed by HPLC to determine the enantiomeric excess: >99% ee (CHIRALPAK IB-H, hexane/*i*-PrOH = 80/20, detector: 254 nm,  $T = 25$  °C, flow rate: 1 mL/min),  $t_1$  (major) = 42.36 min,  $t_2$  (minor) = 56.76 min.

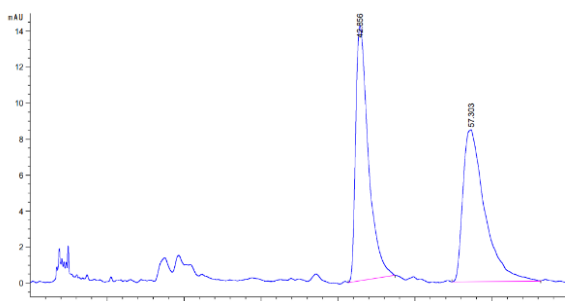

| Peak | RetTime | Area       | Height   | Area    |
|------|---------|------------|----------|---------|
| 1    | 42.856  | 1625.45801 | 14.14548 | 49.4733 |
| 2    | 57.303  | 1660.06873 | 8.44374  | 50.5267 |

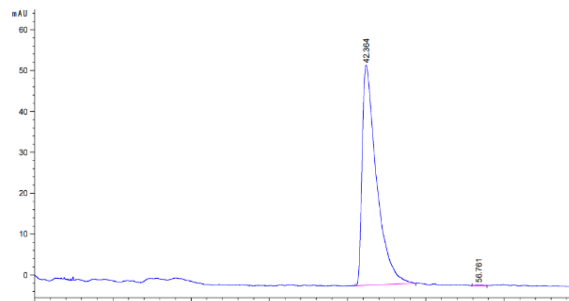

| Peak | RetTime | Area       | Height                 | Area    |
|------|---------|------------|------------------------|---------|
| 1    | 42.364  | 6841.52197 | 53.79322               | 99.8623 |
| 2    | 56.761  | 9.43174    | 1.87364e <sup>-1</sup> | 0.1377  |

**(R)- (E)-6-methyl-3-phenyl-2-(7-styrylquinolin-8-yl)-2H-benzo[e][1,2]thiazine 1,1-dioxide (6zc).**

Yield: 110.0 mg (88%). White solid, mp: 160-161 °C. <sup>1</sup>H NMR (600 MHz, CDCl<sub>3</sub>) δ 9.08 (dd,  $J = 4.2$ ,

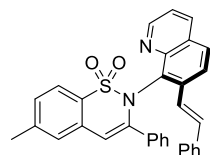

1.7 Hz, 1H), 7.87 (dd,  $J = 8.3$ , 1.7 Hz, 1H), 7.76 (d,  $J = 7.9$  Hz, 1H), 7.51 (d,  $J = 7.2$  Hz, 2H), 7.42 (d,  $J = 9.8$  Hz, 3H), 7.31 – 7.27 (m, 2H), 7.23 – 7.19 (m, 3H), 7.03 – 6.96 (m, 3H), 6.94 (t,  $J = 7.6$  Hz, 2H), 6.81 (d,  $J = 16.2$  Hz, 1H), 6.71 – 6.53 (m,

2H), 2.53 (s, 3H). <sup>13</sup>C NMR (151 MHz, CDCl<sub>3</sub>) δ 151.5, 147.2, 146.2, 142.5, 138.2, 136.8, 135.7, 135.5, 133.6, 132.9, 132.8, 130.0, 129.3, 128.9, 128.7, 128.6, 128.3, 128.1, 128.0, 127.9, 127.7, 126.9, 123.8, 123.6, 122.10, 121.4, 111.1, 21.8. HRMS (ESI):  $m/z$   $[M+H]^+$  calcd for  $[C_{32}H_{25}N_2O_2S]^+$  requires 501.1631, found 501.1635.  $[\alpha]_D^{25} = +43$  ( $c = 0.1$ ,  $CH_2Cl_2$ ). The product was analyzed by HPLC to determine the enantiomeric excess: 97% ee (CHIRALPAK IB-H, hexane/*i*-PrOH = 80/20, detector: 254 nm,  $T = 25$  °C, flow rate: 1 mL/min),  $t_1$  (minor) = 40.49 min,  $t_2$  (major) = 57.13 min.

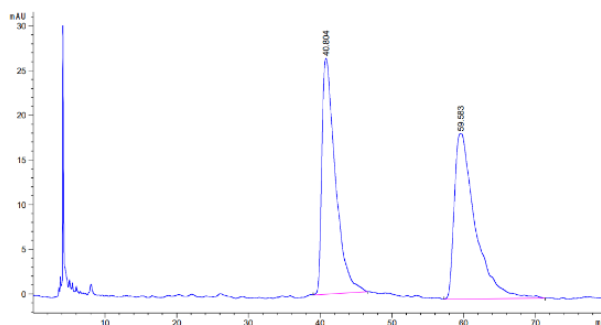

| Peak | RetTime | Area       | Height   | Area    |
|------|---------|------------|----------|---------|
| 1    | 40.804  | 3451.33691 | 26.37794 | 47.9621 |

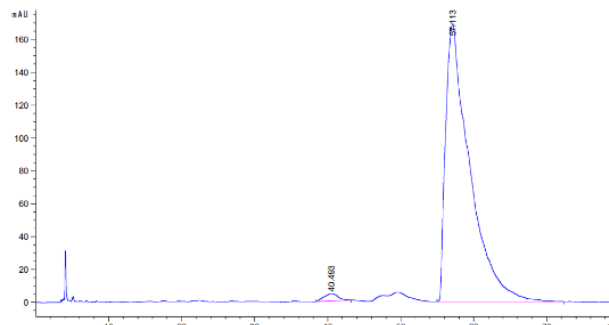

| Peak | RetTime | Area      | Height  | Area   |
|------|---------|-----------|---------|--------|
| 1    | 40.493  | 597.75977 | 4.47436 | 1.5168 |

|   |        |            |          |         |
|---|--------|------------|----------|---------|
| 2 | 59.583 | 3744.62817 | 18.51033 | 52.0379 |
|---|--------|------------|----------|---------|

|   |        |           |           |         |
|---|--------|-----------|-----------|---------|
| 2 | 57.113 | 3.88110e4 | 169.10344 | 98.4832 |
|---|--------|-----------|-----------|---------|

**(R)-6-methyl-3-phenyl-2-(7-(thiophen-3-yl)quinolin-8-yl)-2H-benzo[e][1,2]thiazine 1,1-dioxide (6zd).**

Yield: 64.8 mg (54%). White solid, mp: 225-226 °C. <sup>1</sup>H NMR (600 MHz, CDCl<sub>3</sub>) δ 9.24 (d, *J* = 4.1

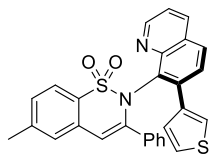

Hz, 1H), 8.09 (d, *J* = 8.2 Hz, 1H), 7.78 (d, *J* = 7.9 Hz, 1H), 7.60 (d, *J* = 8.3 Hz, 1H), 7.49 – 7.43 (m, 1H), 7.32 (d, *J* = 8.0 Hz, 1H), 7.21 (d, *J* = 7.7 Hz, 2H), 7.14 (d, *J* = 8.3 Hz, 1H), 7.08 – 7.02 (m, 2H), 6.98 – 6.90 (m, 3H), 6.58 (s, 1H), 6.50 (d,

*J* = 4.9 Hz, 1H), 6.22 (s, 1H), 2.47 (s, 3H). <sup>13</sup>C NMR (151 MHz, CDCl<sub>3</sub>) δ 151.6, 147.1, 143.6, 142.1, 138.0, 137.4, 135.7, 135.6, 133.7, 133.3, 129.5, 128.9, 128.7, 128.2, 128.1, 128.0, 128.0, 127.6, 127.6, 124.2, 123.5, 122.1, 121.7, 111.7, 21.7. HRMS (ESI): *m/z* [M+H]<sup>+</sup> calcd for [C<sub>28</sub>H<sub>21</sub>N<sub>2</sub>O<sub>2</sub>S<sub>2</sub>]<sup>+</sup> requires 481.1039, found 481.1048. [α]<sub>D</sub><sup>25</sup> = + 311 (c = 0.1, CH<sub>2</sub>Cl<sub>2</sub>). The product was analyzed by HPLC to determine the enantiomeric excess: 99% ee (CHIRALPAK IB-H, hexane/*i*-PrOH = 80/20, detector: 254 nm, T = 25 °C, flow rate: 1 mL/min), *t*<sub>1</sub> (major) = 32.43 min, *t*<sub>2</sub> (minor) = 38.39 min.

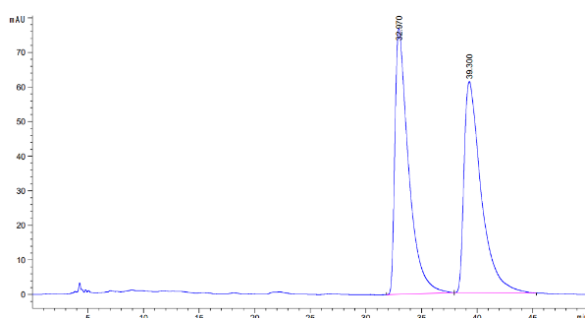

| Peak | RetTime | Area       | Height   | Area    |
|------|---------|------------|----------|---------|
| 1    | 32.970  | 6536.83984 | 76.75323 | 50.0620 |
| 2    | 39.300  | 6520.65381 | 61.04184 | 49.9380 |

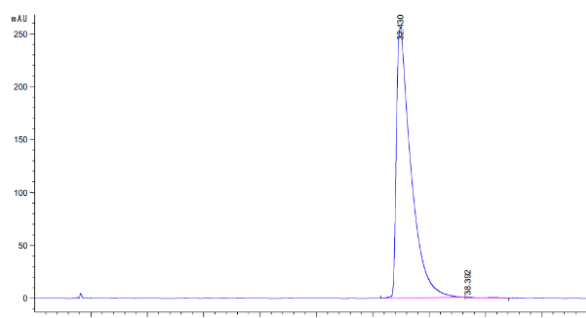

| Peak | RetTime | Area      | Height     | Area    |
|------|---------|-----------|------------|---------|
| 1    | 32.430  | 2.28055e4 | 255.08836  | 99.7306 |
| 2    | 38.392  | 61.61191  | 6.18263e-1 | 0.2694  |

**(R)-2-(5-chloro-7-methylquinolin-8-yl)-6-methyl-3-phenyl-2H-benzo[e][1,2]thiazine 1,1-dioxide (6ze).**

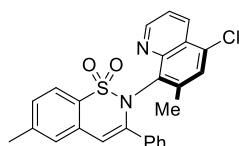

Yield: 108.2 mg (97%). White solid, mp: 246-247 °C. <sup>1</sup>H NMR (600 MHz, CDCl<sub>3</sub>) δ 8.98 (dd, *J* = 4.2, 1.7 Hz, 1H), 8.33 (dd, *J* = 8.5, 1.8 Hz, 1H), 7.68 (d, *J* = 8.0 Hz, 1H), 7.57 (d, *J* = 7.2 Hz, 2H), 7.43 – 7.33 (m, 2H), 7.24 (d, *J* = 7.0

Hz, 2H), 7.10 (t, *J* = 7.3 Hz, 1H), 7.05 (t, *J* = 7.5 Hz, 2H), 6.72 (s, 1H), 2.44 (s, 3H), 2.16 (s, 3H). <sup>13</sup>C NMR (151 MHz, CDCl<sub>3</sub>) δ 151.4, 147.2, 144.5, 142.5, 139.9, 135.7, 133.6, 132.8, 132.6, 131.5, 130.3, 129.4, 129.3, 128.7, 128.1, 127.9, 127.6, 125.0, 121.7, 121.5, 111.5, 21.8, 18.8. HRMS (ESI): *m/z*

$[M+H]^+$  calcd for  $[C_{25}H_{20}ClN_2O_2S]^+$  requires 447.0929, found 447.0927.  $[\alpha]_D^{25} = +40$  ( $c = 0.1$ ,  $CH_2Cl_2$ ). The product was analyzed by HPLC to determine the enantiomeric excess: 98% ee (CHIRALPAK IB-H, hexane/*i*-PrOH = 80/20, detector: 254 nm,  $T = 25$  °C, flow rate: 1 mL/min),  $t_1$  (major) = 31.18 min,  $t_2$  (minor) = 35.22 min.

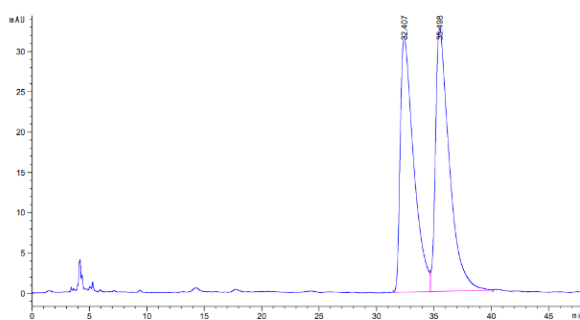

| Peak | RetTime | Area       | Height   | Area    |
|------|---------|------------|----------|---------|
| 1    | 32.407  | 2571.64209 | 31.64595 | 48.4591 |
| 2    | 35.498  | 2735.18457 | 32.60436 | 51.5409 |

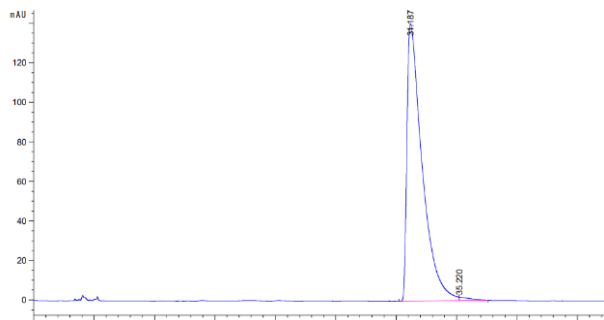

| Peak | RetTime | Area      | Height    | Area    |
|------|---------|-----------|-----------|---------|
| 1    | 31.184  | 1.22611e4 | 140.20547 | 99.1214 |
| 2    | 35.220  | 108.68090 | 1.69732   | 0.8786  |

#### 4-methyl-N-(7-methylquinolin-8-yl)benzenesulfonamide (1a)

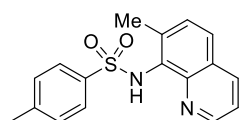

Yield: 1.4 g (90%). White solid, mp: 114-115 °C. <sup>1</sup>H NMR (600 MHz, CDCl<sub>3</sub>)

δ 8.37 (dd,  $J = 4.2, 1.7$  Hz, 1H), 8.14 (s, 1H), 7.97 (dd,  $J = 8.2, 1.7$  Hz, 1H), 7.55 (d,  $J = 8.4$  Hz, 1H), 7.43 (d,  $J = 8.4$  Hz, 1H), 7.38 (d,  $J = 8.3$  Hz, 2H), 7.19 –

7.15 (m, 1H), 6.90 (d,  $J = 8.0$  Hz, 2H), 2.76 (s, 3H), 2.21 (s, 3H). <sup>13</sup>C NMR (151 MHz, CDCl<sub>3</sub>) δ 148.8, 143.1, 142.9, 136.7, 135.9, 135.6, 131.1, 130.5, 128.6, 127.6, 126.4, 125.2, 120.4, 21.3, 20.1.

HRMS (ESI):  $m/z$   $[M+H]^+$  calcd for  $[C_{17}H_{17}N_2O_2S]^+$  requires 313.0932, found 313.1009.

#### 4-fluoro-N-(7-methylquinolin-8-yl)benzenesulfonamide (1b)

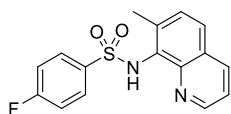

Yield: 870.0 mg (90%). White solid, mp: 132-133 °C. <sup>1</sup>H NMR (600 MHz, CDCl<sub>3</sub>)

δ 8.37 (dd,  $J = 4.2, 1.7$  Hz, 1H), 8.08 (s, 1H), 7.99 (dd,  $J = 8.2, 1.7$  Hz, 1H), 7.57 (d,  $J = 8.5$  Hz, 1H), 7.52 – 7.45 (m, 2H), 7.45 (d,  $J = 8.4$  Hz, 1H), 7.22 – 7.15 (m, 1H), 6.80 – 6.73 (m,

2H), 2.78 (s, 3H). <sup>13</sup>C NMR (151 MHz, CDCl<sub>3</sub>) δ 165.0 (d,  $^1J_{C-F} = 254.1$  Hz), 149.0, 142.8, 137.3, 135.7, 134.7, 134.6, 130.7, 130.5 (d,  $^2J_{C-F} = 36.4$  Hz), 130.4, 126.4, 125.6, 120.6, 115.1, 115.0, 20.0.

<sup>19</sup>F NMR (565 MHz, CDCl<sub>3</sub>) δ -105.8. HRMS (ESI):  $m/z$   $[M+H]^+$  calcd for  $[C_{16}H_{14}FN_2O_2S]^+$  requires 317.0755, found 317.0762.

#### 4-chloro-N-(7-methylquinolin-8-yl)benzenesulfonamide (1c)

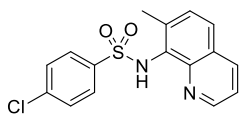

Yield: 1.36 g (82%). White solid, mp: 135-136 °C.  $^1\text{H NMR}$  (600 MHz,  $\text{CDCl}_3$ )

$\delta$  8.37 (dd,  $J = 4.2, 1.7$  Hz, 1H), 8.08 (s, 1H), 8.00 (dd,  $J = 8.2, 1.6$  Hz, 1H), 7.58 (d,  $J = 8.4$  Hz, 1H), 7.45 (d,  $J = 8.4$  Hz, 1H), 7.44 – 7.39 (d, 2H), 7.23 – 7.16 (m,

1H), 7.09 – 7.05 (d, 2H), 2.78 (s, 3H).  $^{13}\text{C NMR}$  (151 MHz,  $\text{CDCl}_3$ )  $\delta$  149.1, 142.8, 138.9, 137.3, 137.2, 135.8, 130.6, 129.1, 128.2, 126.5, 125.7, 120.6, 20.0. **HRMS** (ESI):  $m/z$   $[\text{M}+\text{H}]^+$  calcd for  $[\text{C}_{16}\text{H}_{14}\text{ClN}_2\text{O}_2\text{S}]^+$  requires 333.0459, found 333.0461.

#### 4-bromo-N-(7-methylquinolin-8-yl)benzenesulfonamide (1d)

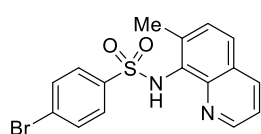

Yield: 1.5 g (80%). White solid, mp: 138-139 °C.  $^1\text{H NMR}$  (600 MHz,  $\text{CDCl}_3$ )

$\delta$  8.37 (dd,  $J = 4.2, 1.7$  Hz, 1H), 8.06 (s, 1H), 8.00 (d,  $J = 8.2$  Hz, 1H), 7.58 (d,  $J = 8.4$  Hz, 1H), 7.46 (d,  $J = 8.4$  Hz, 1H), 7.34 (dd,  $J = 8.6, 1.6$  Hz, 2H),

7.31 – 7.08 (m, 3H), 2.78 (s, 3H).  $^{13}\text{C NMR}$  (151 MHz,  $\text{CDCl}_3$ )  $\delta$  149.0, 142.8, 137.7, 137.3, 135.7, 131.2, 130.6, 130.5, 129.2, 127.4, 126.4, 125.7, 120.6, 20.0. **HRMS** (ESI):  $m/z$   $[\text{M}+\text{H}]^+$  calcd for  $[\text{C}_{16}\text{H}_{14}\text{BrN}_2\text{O}_2\text{S}]^+$  requires 376.9881, found 376.9962.

#### N-(7-methylquinolin-8-yl)benzenesulfonamide (1e)

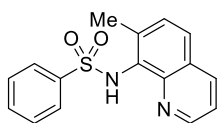

Yield: 1.4 g (94%). White solid, mp: 152-153 °C.  $^1\text{H NMR}$  (600 MHz,  $\text{CDCl}_3$ )  $\delta$

8.34 (dd,  $J = 4.2, 1.7$  Hz, 1H), 8.12 (s, 1H), 7.96 (dd,  $J = 8.2, 1.7$  Hz, 1H), 7.56 (d,  $J = 8.4$  Hz, 1H), 7.50 (dd,  $J = 8.5, 1.3$  Hz, 2H), 7.45 (d,  $J = 8.4$  Hz, 1H), 7.31

– 7.22 (m, 1H), 7.15 (dd,  $J = 8.2, 4.2$  Hz, 1H), 7.13 – 7.09 (m, 2H), 2.78 (s, 3H).  $^{13}\text{C NMR}$  (151 MHz,  $\text{CDCl}_3$ )  $\delta$  148.9, 142.8, 138.6, 136.9, 135.6, 132.3, 130.9, 130.5, 128.0, 127.6, 126.3, 125.4, 120.5, 20.0. **HRMS** (ESI):  $m/z$   $[\text{M}+\text{H}]^+$  calcd for  $[\text{C}_{16}\text{H}_{15}\text{N}_2\text{O}_2\text{S}]^+$  requires 299.0776, found 299.0853.

#### 4-(tert-butyl)-N-(7-methylquinolin-8-yl)benzenesulfonamide (1f)

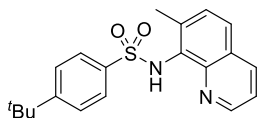

Yield: 1.48 g (83%). White solid, mp: 141-142 °C.  $^1\text{H NMR}$  (600 MHz,  $\text{CDCl}_3$ )

$\delta$  8.26 (dd,  $J = 3.7, 1.8$  Hz, 1H), 8.00 (s, 1H), 7.95 (dd,  $J = 8.2, 2.0$  Hz, 1H), 7.55

(dd,  $J = 8.6, 3.4$  Hz, 1H), 7.44 (dd,  $J = 9.5, 4.6$  Hz, 1H), 7.37 – 7.31 (m, 2H), 7.13 – 7.05 (m, 1H), 7.06 (d,  $J = 6.9$  Hz, 2H), 2.78 (s, 3H), 1.15 (s, 9H).  $^{13}\text{C NMR}$  (151 MHz,  $\text{CDCl}_3$ )  $\delta$  156.2, 148.7, 142.9, 137.1, 135.5, 135.4, 131.1, 130.5, 127.4, 126.3, 125.4, 125.3, 124.8, 120.2, 34.9, 31.0, 20.0. **HRMS** (ESI):  $m/z$   $[\text{M}+\text{H}]^+$  calcd for  $[\text{C}_{20}\text{H}_{23}\text{N}_2\text{O}_2\text{S}]^+$  requires 355.1475, found 355.1483.

#### N-(7-methylquinolin-8-yl)-[1,1'-biphenyl]-4-sulfonamide (1g)

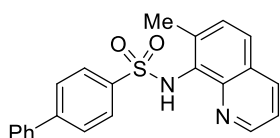

Yield: 1.8 g (81%). White solid, mp: 147-148 °C.  $^1\text{H NMR}$  (600 MHz,  $\text{CDCl}_3$ )  $\delta$  8.32 (dd,  $J = 4.2, 1.7$  Hz, 1H), 8.13 (s, 1H), 7.96 (dd,  $J = 8.2, 1.7$  Hz, 1H), 7.57 (d,  $J = 8.4$  Hz, 1H), 7.53 (d,  $J = 8.5$  Hz, 2H), 7.46 (d,  $J = 8.5$  Hz, 1H), 7.45 – 7.34 (m, 5H), 7.29 (d,  $J = 8.5$  Hz, 2H), 7.15 – 7.09 (m, 1H), 2.81 (s, 3H).  $^{13}\text{C NMR}$  (151 MHz,  $\text{CDCl}_3$ )  $\delta$  148.9, 145.3, 142.9, 139.4, 137.2, 137.1, 135.6, 130.9, 130.5, 128.9, 128.3, 128.1, 127.1, 126.6, 126.4, 125.4, 120.4, 20.0. **HRMS** (ESI):  $m/z$   $[\text{M}+\text{H}]^+$  calcd for  $[\text{C}_{22}\text{H}_{19}\text{N}_2\text{O}_2\text{S}]^+$  requires 375.1089, found 375.1167.

#### 4-methoxy-N-(7-methylquinolin-8-yl)benzenesulfonamide (1h)

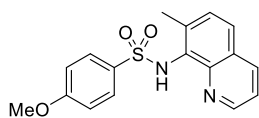

Yield: 1.29 g (79%). White solid, mp: 135-136 °C.  $^1\text{H NMR}$  (600 MHz,  $\text{CDCl}_3$ )  $\delta$  8.41 (dd,  $J = 3.5, 1.7$  Hz, 1H), 8.11 (s, 1H), 7.98 (dd,  $J = 8.4, 2.0$  Hz, 1H), 7.55 (d,  $J = 8.5$  Hz, 1H), 7.46 – 7.40 (m, 3H), 7.20 – 7.14 (m, 1H), 6.60 – 6.54 (m, 2H), 3.69 (d,  $J = 3.1$  Hz, 3H), 2.77 (s, 3H).  $^{13}\text{C NMR}$  (151 MHz,  $\text{CDCl}_3$ )  $\delta$  162.8, 148.9, 142.9, 136.8, 135.6, 131.2, 130.5, 129.7, 126.4, 125.2, 120.5, 113.1, 55.4, 20.0. **HRMS** (ESI):  $m/z$   $[\text{M}+\text{H}]^+$  calcd for  $[\text{C}_{17}\text{H}_{17}\text{N}_2\text{O}_3\text{S}]^+$  requires 328.0882, found 329.0963.

#### N-(7-Methylquinoline-8-yl)-4-acetamidobenzenesulfonamide (1i)

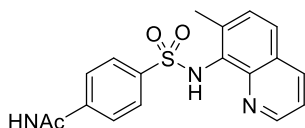

Yield: 532 mg (30%). White solid, mp: 241-242 °C.  $^1\text{H NMR}$  (600 MHz,  $\text{DMSO}-d_6$ )  $\delta$  10.16 (s, 1H), 9.49 (s, 1H), 8.42 (dd,  $J = 4.2, 1.7$  Hz, 1H), 8.23 (dd,  $J = 8.2, 1.7$  Hz, 1H), 7.77 (d,  $J = 8.4$  Hz, 1H), 7.54 – 7.48 (m, 3H), 7.47 – 7.42 (m, 2H), 7.37 – 7.28 (m, 1H), 2.56 (s, 3H), 2.05 (s, 3H).  $^{13}\text{C NMR}$  (151 MHz,  $\text{CDCl}_3$ )  $\delta$  174.0, 154.4, 149.2, 147.8, 143.2, 141.0, 139.6, 136.4, 135.0, 133.4, 131.8, 131.5, 125.9, 122.9, 29.3, 24.7. **HRMS** (ESI):  $m/z$   $[\text{M}+\text{H}]^+$  calcd for  $[\text{C}_{18}\text{H}_{18}\text{N}_3\text{O}_3\text{S}]^+$  requires 356.1063, found 356.1072.

#### N-(7-methylquinolin-8-yl)-4-(trifluoromethyl)benzenesulfonamide (1j)

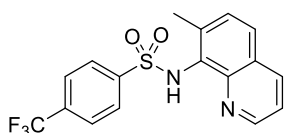

Yield: 1.20 g (66%). White solid, mp: 150-151 °C.  $^1\text{H NMR}$  (600 MHz,  $\text{CDCl}_3$ )  $\delta$  8.26 (dd,  $J = 4.2, 1.6$  Hz, 1H), 8.01 (s, 1H), 7.98 (dd,  $J = 8.2, 1.7$  Hz, 1H), 7.59 (t,  $J = 7.9$  Hz, 3H), 7.48 (d,  $J = 8.4$  Hz, 1H), 7.35 (d,  $J = 8.2$  Hz, 2H), 7.18 – 7.12 (m, 1H), 2.80 (s, 3H).  $^{13}\text{C NMR}$  (151 MHz,  $\text{CDCl}_3$ )  $\delta$  149.0, 142.7, 142.0, 137.7, 135.7, 134.1 (q,  $^2J_{\text{C-F}} = 32.9$  Hz), 130.6, 130.3, 128.2, 126.4, 126.0, 124.9 (q,  $^3J_{\text{C-F}} = 4.5$  Hz), 124.1,

123.1 (q,  $^1J_{C-F} = 272.54$  Hz), 120.6, 20.0.  **$^{19}\text{F}$  NMR** (565 MHz,  $\text{CDCl}_3$ )  $\delta$  -63.2. **HRMS** (ESI):  $m/z$   $[\text{M}+\text{H}]^+$  calcd for  $[\text{C}_{18}\text{H}_{15}\text{F}_3\text{NO}_2\text{S}]^+$  requires 366.077, found 366.0779.

### 2-fluoro-*N*-(7-methylquinolin-8-yl)benzenesulfonamide (1k)

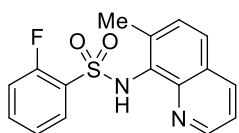

Yield: 1.2 g (75%). White solid, mp: 126-127 °C.  **$^1\text{H}$  NMR** (600 MHz,  $\text{CDCl}_3$ )

$\delta$  8.40 (d,  $J = 4.7$  Hz, 1H), 8.20 (s, 1H), 7.98 (d,  $J = 8.1$  Hz, 1H), 7.57 (d,  $J = 8.5$  Hz, 1H), 7.50 – 7.38 (m, 2H), 7.37 – 7.32 (m, 1H), 7.17 (dd,  $J = 8.4, 4.2$  Hz, 1H),

7.02 (t,  $J = 9.3$  Hz, 1H), 6.90 (t,  $J = 7.6$  Hz, 1H), 2.74 (s, 3H).  **$^{13}\text{C}$  NMR** (151 MHz,  $\text{CDCl}_3$ )  $\delta$  159.7 (d,  $^1J_{C-F} = 256.3$  Hz), 149.1, 143.3, 137.8, 135.7, 134.7 (d,  $^3J_{C-F} = 8.5$  Hz), 130.5, 130.1, 126.4, 125.8, 123.5 (d,  $^4J_{C-F} = 3.8$  Hz), 120.6, 116.4 (d,  $^2J_{C-F} = 21.7$  Hz), 20.0.  **$^{19}\text{F}$  NMR** (565 MHz,  $\text{CDCl}_3$ )  $\delta$  -106.9. **HRMS** (ESI):  $m/z$   $[\text{M}+\text{H}]^+$  calcd for  $[\text{C}_{16}\text{H}_{14}\text{FN}_2\text{O}_2\text{S}]^+$  requires 317.0682, found 317.0758.

### 2-chloro-*N*-(7-methylquinolin-8-yl)benzenesulfonamide (1l)

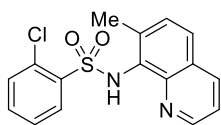

Yield: 1.1 g (67%). White solid, mp: 147-148 °C.  **$^1\text{H}$  NMR** (600 MHz,  $\text{CDCl}_3$ )  $\delta$

8.41 (dd,  $J = 4.2, 1.7$  Hz, 1H), 8.36 (s, 1H), 7.98 (dd,  $J = 8.2, 1.7$  Hz, 1H), 7.62 (dd,  $J = 7.9, 1.6$  Hz, 1H), 7.58 (d,  $J = 8.5$  Hz, 1H), 7.46 (dd,  $J = 8.0, 1.2$  Hz, 1H),

7.43 (d,  $J = 8.4$  Hz, 1H), 7.34 – 7.28 (m, 1H), 7.20 – 7.17 (m, 1H), 7.05 (t,  $J = 7.7$  Hz, 1H), 2.69 (s, 3H).  **$^{13}\text{C}$  NMR** (151 MHz,  $\text{CDCl}_3$ )  $\delta$  149.0, 143.4, 137.9, 135.6, 133.2, 133.1, 131.2, 130.9, 130.6, 130.4, 126.4, 126.3, 125.8, 120.6, 20.0. **HRMS** (ESI):  $m/z$   $[\text{M}+\text{H}]^+$  calcd for  $[\text{C}_{16}\text{H}_{14}\text{ClN}_2\text{O}_2\text{S}]^+$  requires 333.0386, found 333.0463.

### 2-bromo-*N*-(7-methylquinolin-8-yl)benzenesulfonamide (1m)

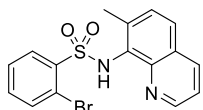

Yield: 1.49 g (79%). White solid, mp: 170-171 °C.  **$^1\text{H}$  NMR** (600 MHz,  $\text{CDCl}_3$ )  $\delta$

8.41 (dd,  $J = 4.3, 1.7$  Hz, 2H), 7.97 (dd,  $J = 8.2, 1.7$  Hz, 1H), 7.67 (dd,  $J = 7.9, 1.2$

Hz, 1H), 7.64 (dd,  $J = 7.9, 1.7$  Hz, 1H), 7.57 (d,  $J = 8.4$  Hz, 1H), 7.42 (d,  $J = 8.4$  Hz, 1H), 7.21 (td,  $J = 7.7, 1.7$  Hz, 1H), 7.18 – 7.14 (m, 1H), 7.08 (td,  $J = 7.6, 1.2$  Hz, 1H), 2.68 (s, 3H).  **$^{13}\text{C}$  NMR** (151 MHz,  $\text{CDCl}_3$ )  $\delta$  148.9, 143.4, 139.6, 137.9, 135.5, 134.7, 133.1, 131.0, 130.8, 130.3, 126.8, 126.4, 125.8, 121.6, 120.6, 20.0. **HRMS** (ESI):  $m/z$   $[\text{M}+\text{H}]^+$  calcd for  $[\text{C}_{16}\text{H}_{14}\text{BrN}_2\text{O}_2\text{S}]^+$  requires 376.9954, found 376.9962.

### 3-chloro-*N*-(7-methylquinolin-8-yl)benzenesulfonamide (1n)

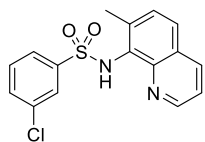

Yield: 1.33 g (80%). White solid, mp: 143-144 °C.  $^1\text{H NMR}$  (600 MHz,  $\text{CDCl}_3$ )  $\delta$  8.39 (dd,  $J = 4.2, 1.7$  Hz, 1H), 8.08 (s, 1H), 8.00 (dd,  $J = 8.2, 1.7$  Hz, 1H), 7.58 (d,  $J = 8.4$  Hz, 1H), 7.52 (t,  $J = 1.9$  Hz, 1H), 7.46 (d,  $J = 8.4$  Hz, 1H), 7.31 (d,  $J = 7.9$  Hz, 1H), 7.24 – 7.20 (m, 1H), 7.19 – 7.14 (m, 1H), 7.00 (t,  $J = 7.9$  Hz, 1H), 2.78 (s, 3H).  $^{13}\text{C NMR}$  (151 MHz,  $\text{CDCl}_3$ )  $\delta$  149.0, 142.7, 140.1, 137.4, 135.7, 134.2, 132.3, 130.6, 130.4, 129.1, 127.9, 126.5, 125.8, 125.7, 120.6, 20.0. **HRMS** (ESI):  $m/z$   $[\text{M}+\text{H}]^+$  calcd for  $[\text{C}_{16}\text{H}_{14}\text{ClN}_2\text{O}_2\text{S}]^+$  requires 333.0459, found 333.0467.

### 3-bromo-N-(7-methylquinolin-8-yl)benzenesulfonamide (1o)

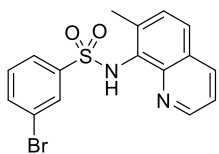

Yield: 1.02 g (55%). White solid, mp: 155-156 °C.  $^1\text{H NMR}$  (600 MHz,  $\text{CDCl}_3$ )  $\delta$  8.39 (dd,  $J = 4.3, 1.7$  Hz, 1H), 8.09 (s, 1H), 7.99 (dd,  $J = 8.3, 1.7$  Hz, 1H), 7.64 (t,  $J = 1.9$  Hz, 1H), 7.58 (d,  $J = 8.5$  Hz, 1H), 7.44 (d,  $J = 8.4$  Hz, 1H), 7.35 (t,  $J = 7.8$  Hz, 2H), 7.21 – 7.15 (m, 1H), 6.92 (t,  $J = 7.9$  Hz, 1H), 2.77 (s, 3H).  $^{13}\text{C NMR}$  (151 MHz,  $\text{CDCl}_3$ )  $\delta$  149.0, 142.7, 140.3, 137.4, 135.8, 135.2, 130.8, 130.5, 130.4, 129.3, 126.5, 126.1, 128.8, 121.9, 120.7, 20.0. **HRMS** (ESI):  $m/z$   $[\text{M}+\text{H}]^+$  calcd for  $[\text{C}_{16}\text{H}_{14}\text{BrN}_2\text{O}_2\text{S}]^+$  requires 376.9954, found 376.9958.

### 2,4-difluoro-N-(7-methylquinolin-8-yl)benzenesulfonamide (1p)

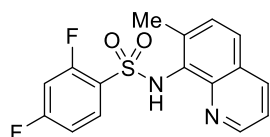

Yield: 1.4 g (81%). White solid, mp: 140-141 °C.  $^1\text{H NMR}$  (600 MHz,  $\text{CDCl}_3$ )  $\delta$  8.44 (dd,  $J = 4.2, 1.7$  Hz, 1H), 8.13 (s, 1H), 8.01 (dd,  $J = 8.2, 1.7$  Hz, 1H), 7.59 (d,  $J = 8.4$  Hz, 1H), 7.50 – 7.41 (m, 2H), 7.25 – 7.18 (m, 1H), 6.75 (t,  $J = 8.13$  Hz, 1H), 6.60 (t,  $J = 8.35$  Hz, 1H), 2.74 (s, 3H).  $^{13}\text{C NMR}$  (151 MHz,  $\text{CDCl}_3$ )  $\delta$  165.71 (dd,  $J = 257.5, 12.0$  Hz), 161.41 (d,  $^2J_{\text{C-F}} = 16.0$  Hz), 159.68 (d,  $^2J_{\text{C-F}} = 15.4$  Hz), 149.22, 143.28, 138.22, 135.79, 131.84 (d,  $^2J_{\text{C-F}} = 10.4$  Hz), 130.49, 126.46, 126.01, 124.19 (dd,  $J = 14.4, 3.9$  Hz), 120.73, 110.77 (dd,  $J = 21.6, 3.8$  Hz), 104.82 (t,  $^2J_{\text{C-F}} = 25.6$  Hz), 19.96.  $^{19}\text{F NMR}$  (565 MHz,  $\text{CDCl}_3$ )  $\delta$  -101.2, -101.4. **HRMS** (ESI):  $m/z$   $[\text{M}+\text{H}]^+$  calcd for  $[\text{C}_{16}\text{H}_{13}\text{F}_2\text{N}_2\text{O}_2\text{S}]^+$  requires 335.0588, found 335.0663.

### 3,4-dimethoxy-N-(7-methylquinolin-8-yl)benzenesulfonamide (1q)

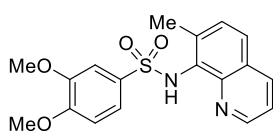

Yield: 1.3 g (75%). White solid, mp: 129-130 °C.  $^1\text{H NMR}$  (600 MHz,  $\text{CDCl}_3$ )  $\delta$  8.40 (dd,  $J = 4.2, 1.7$  Hz, 1H), 8.13 (s, 1H), 7.99 (dd,  $J = 8.2, 1.7$  Hz, 1H), 7.56 (d,  $J = 8.5$  Hz, 1H), 7.45 (d,  $J = 8.4$  Hz, 1H), 7.21 – 7.09 (m, 2H), 6.87 (d,  $J = 2.1$  Hz, 1H), 6.56 (d,  $J = 8.5$  Hz, 1H), 3.77 (s, 3H), 3.57 (s, 3H), 2.79 (s, 3H).  $^{13}\text{C NMR}$  (151 MHz,



CDCl<sub>3</sub>)  $\delta$  152.4, 148.9, 148.1, 142.9, 136.8, 135.6, 131.4, 130.6, 130.5, 126.4, 125.1, 121.6, 120.6, 110.2, 109.7, 56.0, 55.9, 20.1. **HRMS** (ESI):  $m/z$  [M+H]<sup>+</sup> calcd for [C<sub>18</sub>H<sub>19</sub>N<sub>2</sub>O<sub>4</sub>S]<sup>+</sup> requires 359.0987, found 359.1069.

#### N-(7-methylquinolin-8-yl)thiophene-2-sulfonamide (1r)

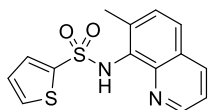

Yield: 608 g (40%). White solid, mp: 119-120 °C. **<sup>1</sup>H NMR** (600 MHz, CDCl<sub>3</sub>)  $\delta$  8.43 (dd,  $J$  = 4.2, 1.6 Hz, 1H), 8.20 (s, 1H), 8.02 (dd,  $J$  = 8.2, 1.7 Hz, 1H), 7.60 (d,  $J$  = 8.4 Hz, 1H), 7.47 (d,  $J$  = 8.6 Hz, 1H), 7.27 (d,  $J$  = 5.0 Hz, 1H), 7.23 – 7.18 (m, 1H), 7.15 – 7.09 (m, 1H), 6.68 (dd,  $J$  = 5.0, 3.7 Hz, 1H), 2.78 (s, 3H). **<sup>13</sup>C NMR** (151 MHz, CDCl<sub>3</sub>)  $\delta$  149.0, 143.2, 139.1, 137.4, 135.7, 132.7, 132.0, 130.1, 130.6, 126.6, 126.4, 125.6, 120.6, 20.0. **HRMS** (ESI):  $m/z$  [M+H]<sup>+</sup> calcd for [C<sub>14</sub>H<sub>13</sub>N<sub>2</sub>O<sub>2</sub>S<sub>2</sub>]<sup>+</sup> requires 305.0413, found 305.0441.

#### N-(7-methylquinolin-8-yl)naphthalene-1-sulfonamide (1s)

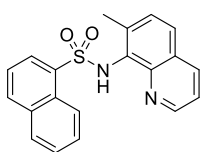

Yield: 1.44 g (83%). White solid, mp: 152-153 °C. **<sup>1</sup>H NMR** (600 MHz, CDCl<sub>3</sub>)  $\delta$  8.53 – 8.48 (m, 1H), 8.24 (s, 1H), 8.02 – 7.97 (t, 1H), 7.81 (dt,  $J$  = 5.7, 2.3 Hz, 3H), 7.69 (t,  $J$  = 6.4 Hz, 1H), 7.50 – 7.45 (m, 1H), 7.43 – 7.34 (m, 3H), 7.27 – 7.21 (m, 1H), 6.93 (dt,  $J$  = 6.1, 3.2 Hz, 1H), 2.75 (s, 3H). **<sup>13</sup>C NMR** (151 MHz, CDCl<sub>3</sub>)  $\delta$  148.2, 143.0, 136.7, 135.2, 135.0, 133.9, 133.7, 131.3, 130.3, 129.5, 129.3, 128.1, 127.3, 126.2, 126.1, 125.3, 124.9, 123.7, 120.2, 20.1. **HRMS** (ESI):  $m/z$  [M+H]<sup>+</sup> calcd for [C<sub>20</sub>H<sub>17</sub>N<sub>2</sub>O<sub>2</sub>S]<sup>+</sup> requires 349.1005, found 349.1008.

#### N-(7-methylquinolin-8-yl)-2-oxo-2H-chromene-7-sulfonamide (1t)

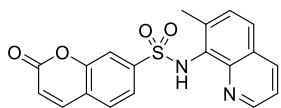

Yield: 420 mg (28%). White solid, mp: 207-208 °C. **<sup>1</sup>H NMR** (600 MHz, CDCl<sub>3</sub>)  $\delta$  8.29 (dd,  $J$  = 4.2, 1.6 Hz, 1H), 8.07 (s, 1H), 7.97 (dd,  $J$  = 8.2, 1.7 Hz, 1H), 7.68 (d,  $J$  = 2.2 Hz, 1H), 7.62 – 7.56 (m, 2H), 7.48 (dd,  $J$  = 9.1, 2.1 Hz, 2H), 7.18 – 7.09 (m, 1H), 7.01 (d,  $J$  = 8.7 Hz, 1H), 6.39 (d,  $J$  = 9.6 Hz, 1H), 2.81 (s, 3H). **<sup>13</sup>C NMR** (151 MHz, CDCl<sub>3</sub>)  $\delta$  159.4, 156.1, 149.0, 142.7, 142.2, 137.8, 135.8, 134.9, 130.8, 130.7, 130.3, 128.0, 126.5, 125.9, 120.7, 117.9, 117.8, 116.6, 20.2. **HRMS** (ESI):  $m/z$  [M+H]<sup>+</sup> calcd for [C<sub>19</sub>H<sub>15</sub>N<sub>2</sub>O<sub>4</sub>S]<sup>+</sup> requires 367.0747, found 367.0754.

#### N-(7-ethylquinolin-8-yl)-4-methylbenzenesulfonamide (1u)

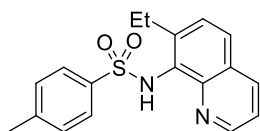

Yield: 1.30 g (80%).  $^1\text{H NMR}$  (600 MHz,  $\text{CDCl}_3$ )  $\delta$  8.35 (dd,  $J = 4.2, 1.7$  Hz, 1H), 8.08 (s, 1H), 7.97 (dd,  $J = 8.1, 1.7$  Hz, 1H), 7.60 (d,  $J = 8.5$  Hz, 1H), 7.52 (d,  $J = 8.5$  Hz, 1H), 7.40 – 7.33 (m, 2H), 7.16 (dd,  $J = 8.2, 4.2$  Hz, 1H), 6.88 (d,  $J = 8.0$  Hz, 2H), 3.32 – 3.20 (m, 2H), 2.20 (s, 3H), 1.34 (t,  $J = 7.6$  Hz, 3H).  $^{13}\text{C NMR}$  (151 MHz,  $\text{CDCl}_3$ )  $\delta$  148.82, 143.05, 142.92, 142.63, 135.52, 130.33, 129.73, 128.80, 128.64, 128.50, 127.71, 126.36, 125.72, 25.35, 21.33, 14.63. **HRMS** (ESI):  $m/z$   $[\text{M}+\text{H}]^+$  calcd for  $[\text{C}_{19}\text{H}_{21}\text{N}_2\text{O}_2\text{S}]^+$  requires 327.1162, found 327.1166.

#### N-(7-butylquinolin-8-yl)-4-methylbenzenesulfonamide (1v)

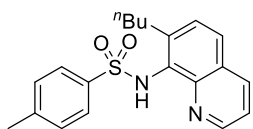

Yield: 796 mg (75%). White solid, mp: 164-165 °C.  $^1\text{H NMR}$  (600 MHz,  $\text{CDCl}_3$ )  $\delta$  8.36 (dd,  $J = 4.2, 1.7$  Hz, 1H), 8.06 (s, 1H), 7.96 (dd,  $J = 8.2, 1.7$  Hz, 1H), 7.58 (d,  $J = 8.5$  Hz, 1H), 7.50 (d,  $J = 8.5$  Hz, 1H), 7.36 (d,  $J = 8.6$  Hz, 2H), 7.23 – 7.15 (m, 1H), 6.89 (d,  $J = 8.0$  Hz, 2H), 3.25 – 3.20 (t, 2H), 2.21 (s, 3H), 1.74 – 1.66 (m, 2H), 1.40 (t,  $J = 7.4$  Hz, 2H), 0.95 (t,  $J = 7.4$  Hz, 3H).  $^{13}\text{C NMR}$  (151 MHz,  $\text{CDCl}_3$ )  $\delta$  148.8, 143.1, 143.0, 141.5, 135.8, 135.5, 130.6, 129.1, 128.5, 127.7, 126.4, 125.5, 120.4, 32.6, 32.0, 22.7, 21.3, 14.0. **HRMS** (ESI):  $m/z$   $[\text{M}+\text{H}]^+$  calcd for  $[\text{C}_{20}\text{H}_{23}\text{N}_2\text{O}_2\text{S}]^+$  requires 355.1475, found 355.1475.

#### N-(7-chloroquinolin-8-yl)-4-methylbenzenesulfonamide (1w)

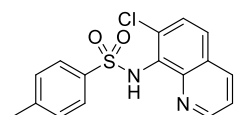

Yield: 1.1 g (66%). White solid, mp: 144-145 °C.  $^1\text{H NMR}$  (600 MHz,  $\text{CDCl}_3$ )  $\delta$  8.64 (dd,  $J = 4.2, 1.6$  Hz, 1H), 8.26 (s, 1H), 8.09 (dd,  $J = 8.2, 1.7$  Hz, 1H), 7.71 (d,  $J = 8.3$  Hz, 2H), 7.60 (d,  $J = 8.8$  Hz, 1H), 7.55 (d,  $J = 8.8$  Hz, 1H), 7.38 – 7.31 (m, 1H), 7.14 (d,  $J = 8.0$  Hz, 2H), 2.35 (s, 3H).  $^{13}\text{C NMR}$  (151 MHz,  $\text{CDCl}_3$ )  $\delta$  150.0, 143.5, 143.1, 137.3, 136.0, 131.8, 130.3, 129.0, 128.9, 127.6, 126.8, 125.8, 121.6, 21.5. **HRMS** (ESI):  $m/z$   $[\text{M}+\text{H}]^+$  calcd for  $[\text{C}_{16}\text{H}_{14}\text{ClN}_2\text{O}_2\text{S}]^+$  requires 333.0386, found 333.0466.

#### N-(5-bromoquinolin-8-yl)-4-methylbenzenesulfonamide (1x)

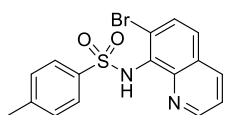

Yield: 1.50 g (80%). White solid, mp: 156-157 °C.  $^1\text{H NMR}$  (600 MHz,  $\text{CDCl}_3$ )  $\delta$  8.56 (dd,  $J = 4.2, 1.7$  Hz, 1H), 8.10 – 8.05 (m, 2H), 7.74 (d,  $J = 8.8$  Hz, 1H), 7.65 (d,  $J = 7.2$  Hz, 2H), 7.54 (d,  $J = 8.8$  Hz, 1H), 7.36 – 7.31 (m, 1H), 7.11 (d,  $J = 8.1$  Hz, 2H), 2.34 (s, 3H).  $^{13}\text{C NMR}$  (151 MHz,  $\text{CDCl}_3$ )  $\delta$  149.9, 143.6, 143.5, 137.2, 136.0, 133.6, 131.8, 128.9, 127.7,

127.3, 126.4, 121.7, 121.1, 21.5. **HRMS** (ESI):  $m/z$   $[M+H]^+$  calcd for  $[C_{16}H_{14}BrN_2O_2S]^+$  requires 376.9954, found 376.9962.

#### 4-methyl-N-(7-phenylquinolin-8-yl)benzenesulfonamide (1y)

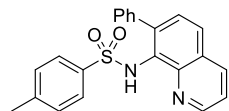

Yield: 1.38 g (79%). Yellow solid, mp: 146-147 °C.  **$^1H$  NMR** (600 MHz,  $CDCl_3$ )  $\delta$  8.70 (dd,  $J = 4.2, 1.7$  Hz, 1H), 8.45 (s, 1H), 8.12 (dd,  $J = 8.2, 1.7$  Hz, 1H), 7.71 (d,  $J = 8.5$  Hz, 1H), 7.63 (d,  $J = 7.7$  Hz, 2H), 7.59 (d,  $J = 8.5$  Hz, 1H), 7.41 – 7.29 (m, 6H), 6.94 (d,  $J = 8.0$  Hz, 2H), 2.28 (s, 3H).  **$^{13}C$  NMR** (151 MHz,  $CDCl_3$ )  $\delta$  149.5, 143.0, 142.7, 139.8, 137.6, 136.7, 135.8, 130.8, 130.2, 129.6, 128.6, 128.3, 127.4, 127.3, 127.1, 125.3, 121.4, 21.4. **HRMS** (ESI):  $m/z$   $[M+H]^+$  calcd for  $[C_{22}H_{19}N_2O_2S]^+$  requires 375.1162, found 375.1166.

#### N-(7-(4-methoxyphenyl)quinolin-8-yl)-4-methylbenzenesulfonamide (1z)

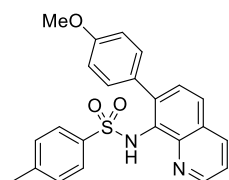

Yield: 594 mg (73%). Yellow solid, mp: 194-195 °C.  **$^1H$  NMR** (600 MHz,  $CDCl_3$ )  $\delta$  8.67 (dd,  $J = 4.2, 1.7$  Hz, 1H), 8.45 (s, 1H), 8.07 (dd,  $J = 8.2, 1.7$  Hz, 1H), 7.66 (d,  $J = 8.5$  Hz, 1H), 7.54 – 7.47 (m, 3H), 7.34 – 7.30 (m, 1H), 7.31 (d,  $J = 8.2$  Hz, 2H), 6.93 (d,  $J = 8.0$  Hz, 2H), 6.84 – 6.79 (d,  $J = 8.2$  Hz, 2H), 3.82 (s, 3H), 2.27 (s, 3H).  **$^{13}C$  NMR** (151 MHz,  $CDCl_3$ )  $\delta$  159.0, 149.5, 143.1, 142.6, 137.2, 137.0, 135.8, 132.0, 130.8, 130.7, 130.2, 128.6, 127.1, 125.2, 121.3, 113.7, 55.1, 21.4. **HRMS** (ESI):  $m/z$   $[M+H]^+$  calcd for  $[C_{23}H_{21}N_2O_3S]^+$  requires 405.1267, found 405.1274.

#### (E)-4-methyl-N-(7-styrylquinolin-8-yl)benzenesulfonamide (1za)

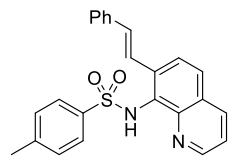

Yield: 882 mg (63%). White solid, mp: 207-208 °C.  **$^1H$  NMR** (600 MHz,  $CDCl_3$ )  $\delta$  8.52 (dd,  $J = 4.2, 1.7$  Hz, 1H), 8.42 (s, 1H), 8.01 – 7.93 (m, 3H), 7.63 – 7.58 (m, 3H), 7.46 (d,  $J = 8.3$  Hz, 2H), 7.38 (t,  $J = 7.6$  Hz, 2H), 7.32 – 7.21 (m, 3H), 6.90 (d,  $J = 7.9$  Hz, 2H), 2.19 (s, 3H).  **$^{13}C$  NMR** (151 MHz,  $CDCl_3$ )  $\delta$  149.3, 143.3, 143.2, 137.3, 135.7, 135.6, 133.8, 130.6, 130.5, 128.7, 128.0, 127.8, 127.4, 127.2, 125.8, 125.5, 124.2, 121.1, 21.4. **HRMS** (ESI):  $m/z$   $[M+H]^+$  calcd for  $[C_{24}H_{22}N_2O_2S]^+$  requires 401.1318, found 401.1321.

#### 4-methyl-N-(7-(thiophen-3-yl)quinolin-8-yl)benzenesulfonamide (1zb)

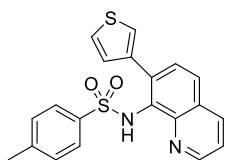

Yield: 741 mg (63%). White solid, mp: 191-192 °C.  $^1\text{H NMR}$  (600 MHz,  $\text{CDCl}_3$ )

$\delta$  8.57 (dd,  $J = 4.2, 1.7$  Hz, 1H), 8.31 (s, 1H), 8.05 (dd,  $J = 8.2, 1.7$  Hz, 1H), 7.67 – 7.62 (m, 3H), 7.55 (dd,  $J = 5.0, 1.3$  Hz, 1H), 7.32 (d,  $J = 8.6$  Hz, 2H), 7.33 – 7.26

(m, 2H), 6.93 (d,  $J = 8.0$  Hz, 2H), 2.25 (s, 3H).  $^{13}\text{C NMR}$  (151 MHz,  $\text{CDCl}_3$ )  $\delta$  149.5, 143.3, 142.9, 140.0, 136.6, 135.7, 133.0, 130.6, 129.5, 128.7, 128.6, 127.3, 127.2, 125.6, 125.2, 124.2, 121.2, 21.4.

**HRMS** (ESI):  $m/z$   $[\text{M}+\text{H}]^+$  calcd for  $[\text{C}_{20}\text{H}_{17}\text{N}_2\text{O}_2\text{S}_2]^+$  requires 381.0726, found 381.0730.

#### **N-(5-chloro-7-methylquinolin-8-yl)-4-methylbenzenesulfonamide(1zc)**

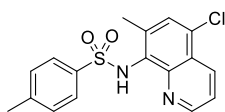

Yield: 504 mg (73%). White solid, mp: 173-174 °C.  $^1\text{H NMR}$  (600 MHz,  $\text{CDCl}_3$ )

$\delta$  8.41 (dd,  $J = 4.2, 1.6$  Hz, 1H), 8.34 (dd,  $J = 8.4, 1.6$  Hz, 1H), 8.05 (s, 1H), 7.53 (s, 1H), 7.41 – 7.36 (d,  $J = 1.6$  Hz, 2H), 7.30 – 7.25 (m, 1H), 6.92 (d,  $J = 8.0$  Hz, 2H), 2.74 (s, 3H),

2.22 (s, 3H).  $^{13}\text{C NMR}$  (151 MHz,  $\text{CDCl}_3$ )  $\delta$  149.4, 143.3, 143.2, 137.2, 135.6, 132.8, 130.5, 130.2, 128.7, 128.5, 127.6, 124.4, 121.1, 21.4, 20.0. **HRMS** (ESI):  $m/z$   $[\text{M}+\text{H}]^+$  calcd for  $[\text{C}_{17}\text{H}_{16}\text{ClN}_2\text{O}_2\text{S}]^+$

requires 347.0616, found 347.0620.

#### **N-(5-bromo-7-methylquinolin-8-yl)-4-methylbenzenesulfonamide (1zd)**

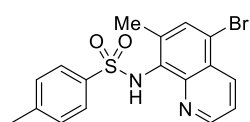

Yield: 1.6 g (82%). White solid, mp: 166-167 °C.  $^1\text{H NMR}$  (600 MHz,  $\text{CDCl}_3$ )

$\delta$  8.39 (dd,  $J = 4.2, 1.6$  Hz, 1H), 8.32 (dd,  $J = 8.4, 1.6$  Hz, 1H), 8.08 (s, 1H), 7.75 (s, 1H), 7.40 (d,  $J = 8.3$  Hz, 2H), 7.33 – 7.22 (m, 1H), 6.93 (d,  $J = 8.0$  Hz, 2H),

2.75 (s, 3H), 2.23 (s, 3H).  $^{13}\text{C NMR}$  (151 MHz,  $\text{CDCl}_3$ )  $\delta$  149.4, 143.3, 143.2, 137.6, 135.7, 135.4, 133.9, 131.2, 128.7, 127.6, 125.8, 121.4, 118.8, 21.4, 19.9. **HRMS** (ESI):  $m/z$   $[\text{M}+\text{H}]^+$  calcd for

$[\text{C}_{17}\text{H}_{16}\text{BrN}_2\text{O}_2\text{S}]^+$  requires 391.0038, found 391.0115.

#### **N-(5,7-dichloroquinolin-8-yl)-4-methylbenzenesulfonamide (1ze)**

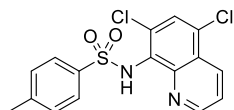

Yield: 413 mg (39%). Yellow solid, mp: 198-199 °C.  $^1\text{H NMR}$  (600 MHz,  $\text{CDCl}_3$ )

$\delta$  8.68 (dd,  $J = 4.3, 1.6$  Hz, 1H), 8.47 (dd,  $J = 8.5, 1.6$  Hz, 1H), 8.19 (s, 1H), 7.71 (d,  $J = 8.1$  Hz, 2H), 7.68 (s, 1H), 7.51 – 7.42 (m, 1H), 7.16 (d,  $J = 8.0$  Hz, 2H), 2.36 (s, 3H).  $^{13}\text{C NMR}$

(151 MHz,  $\text{CDCl}_3$ )  $\delta$  150.6, 143.7, 143.3, 137.2, 133.3, 131.2, 130.0, 129.1, 129.0, 128.6, 127.6, 125.1, 122.3, 21.5. **HRMS** (ESI):  $m/z$   $[\text{M}+\text{H}]^+$  calcd for  $[\text{C}_{16}\text{H}_{13}\text{Cl}_2\text{N}_2\text{O}_2\text{S}]^+$  requires 367.0069, found

367.0075.

**N-(5,7-dibromoquinolin-8-yl)-4-methylbenzenesulfonamide (1zf)**

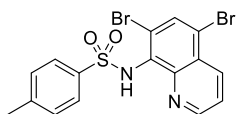

Yield: 720 mg (55%). White solid, mp: 198-199 °C.  $^1\text{H NMR}$  (600 MHz,  $\text{CDCl}_3$ )  $\delta$  8.58 (dd,  $J = 4.2, 1.6$  Hz, 1H), 8.42 (dd,  $J = 8.5, 1.6$  Hz, 1H), 8.06 (s, 2H), 7.68 – 7.64 (d,  $J = 8.6$  Hz, 2H), 7.53 – 7.41 (m, 1H), 7.14 (d,  $J = 8.0$  Hz, 2H), 2.35 (s, 3H).  $^{13}\text{C NMR}$  (151 MHz,  $\text{CDCl}_3$ )  $\delta$  150.5, 143.7, 143.6, 137.1, 135.9, 134.6, 133.7, 129.0, 127.7, 126.8, 122.7, 120.6, 119.5, 21.5. **HRMS** (ESI):  $m/z$   $[\text{M}+\text{H}]^+$  calcd for  $[\text{C}_{16}\text{H}_{13}\text{Br}_2\text{N}_2\text{O}_2\text{S}]^+$  requires 454.9059, found 454.9067.

#### IV. NMR spectra for new compounds

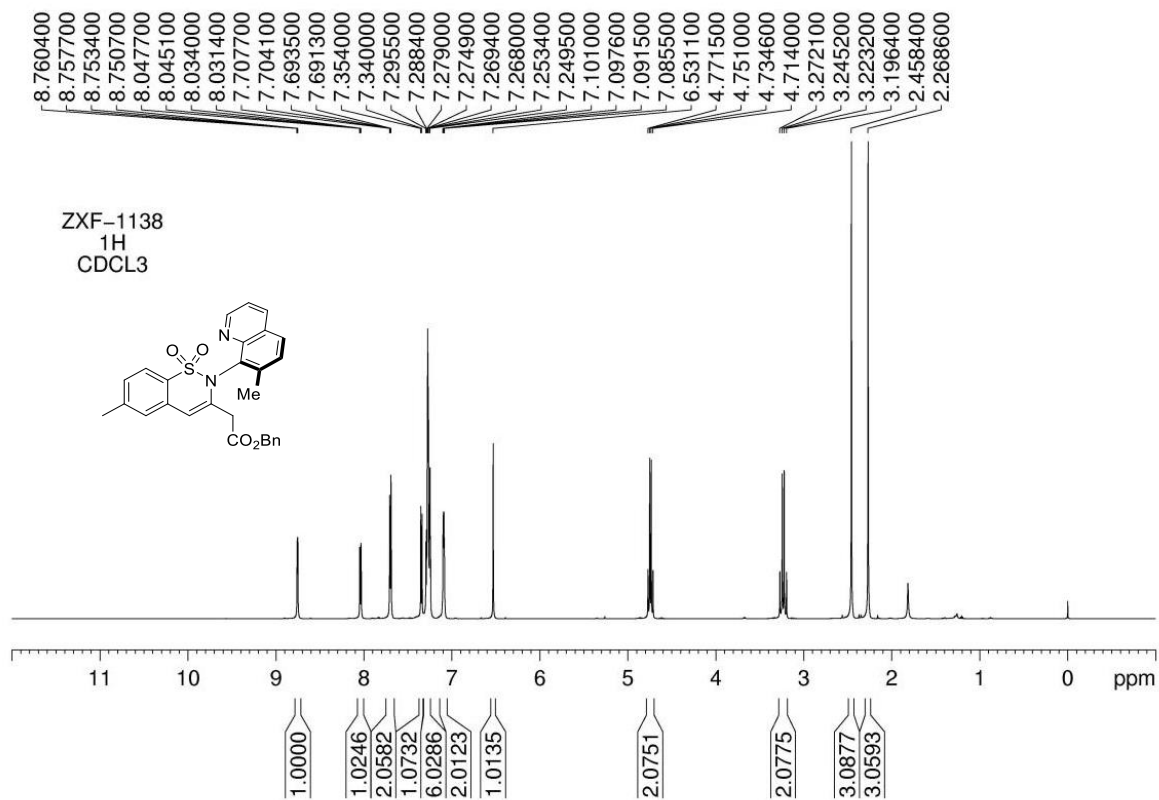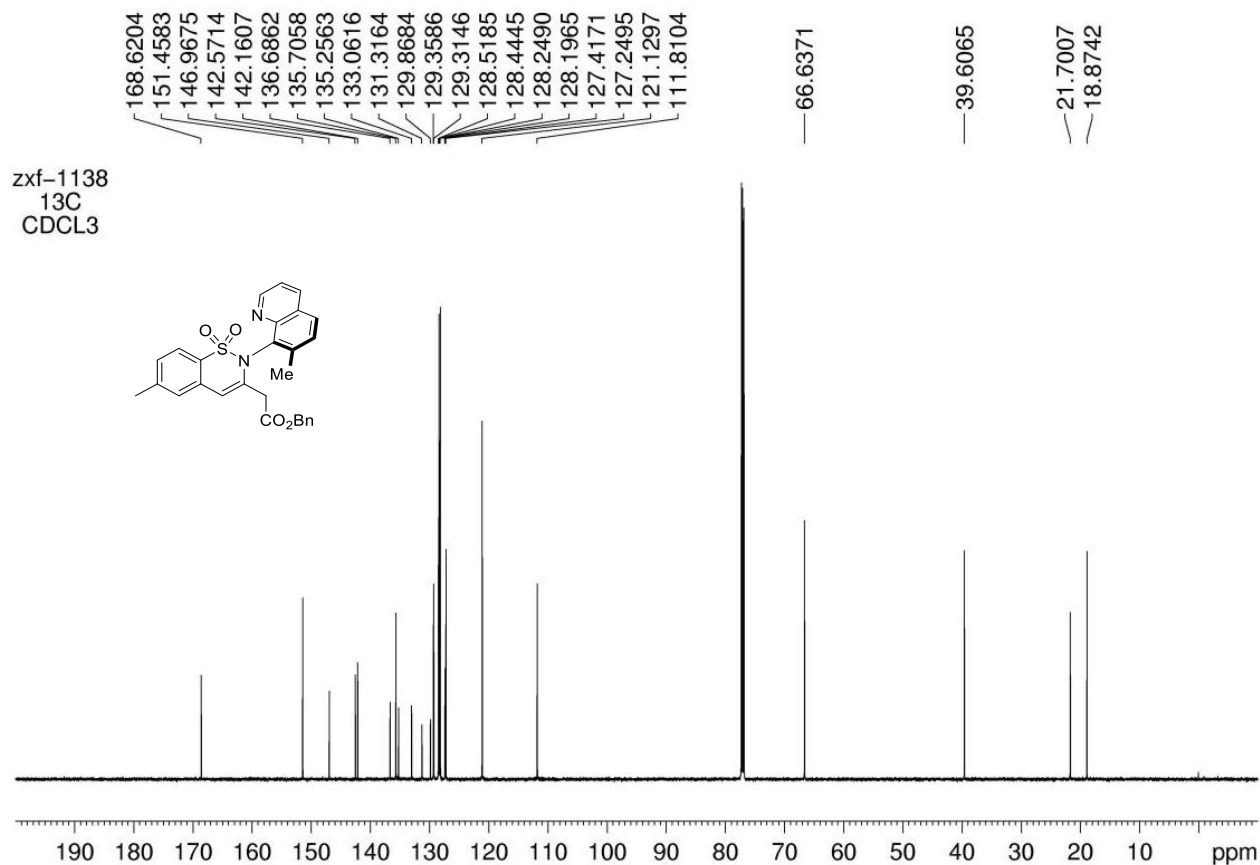

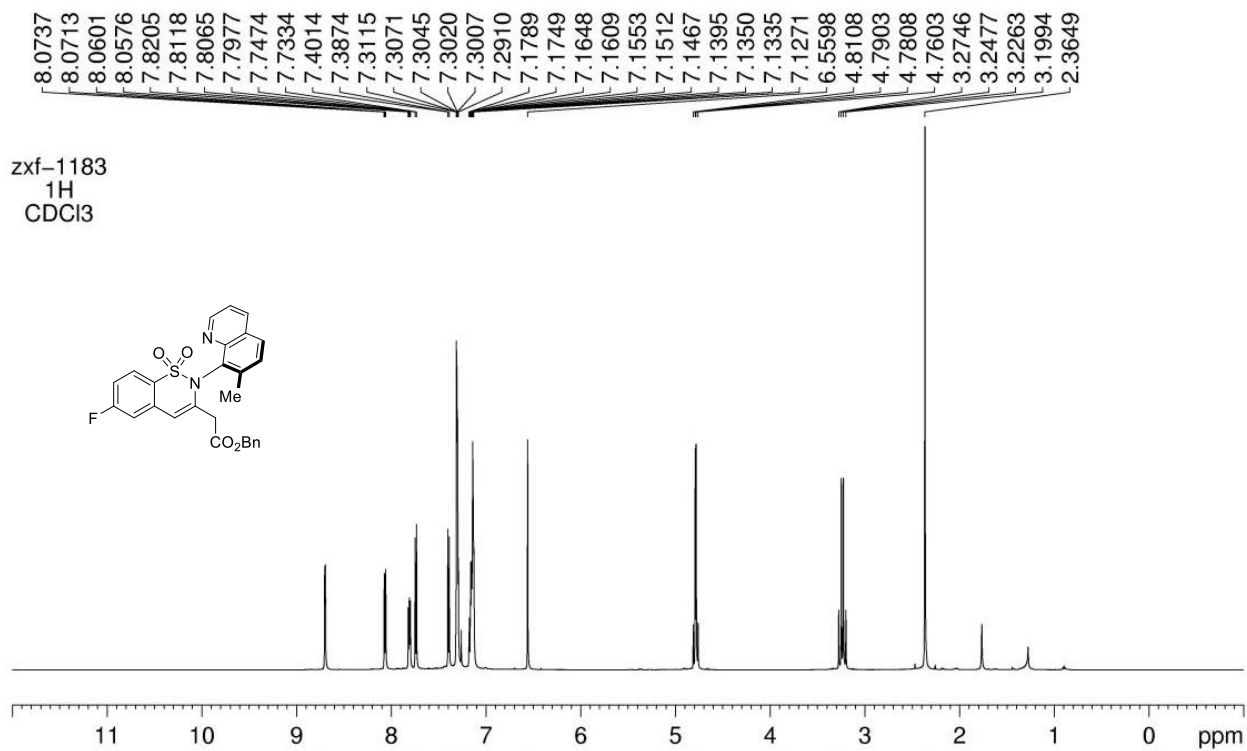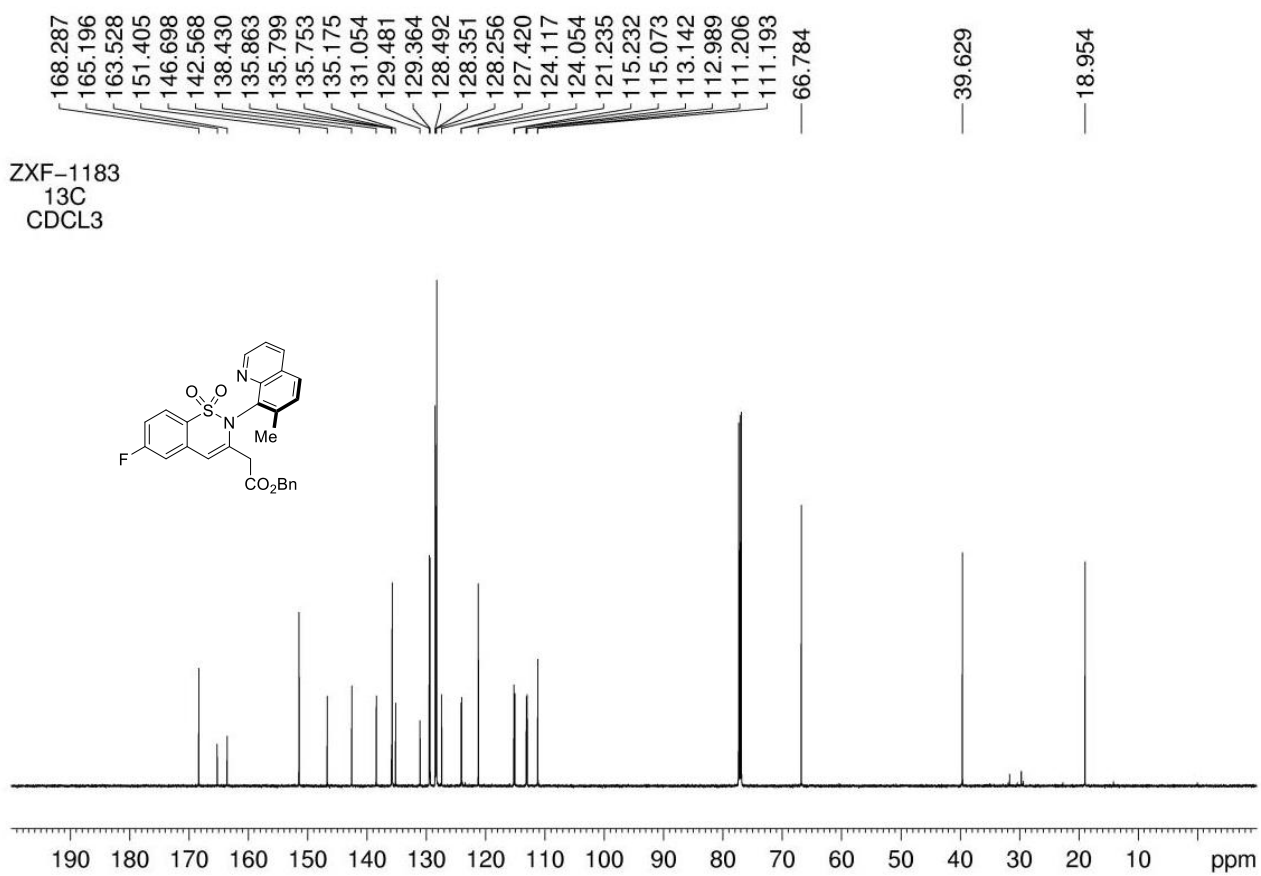

ZXF-1183  
19F  
CDCL3

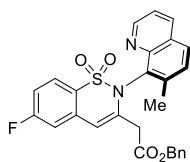

— -106.9127

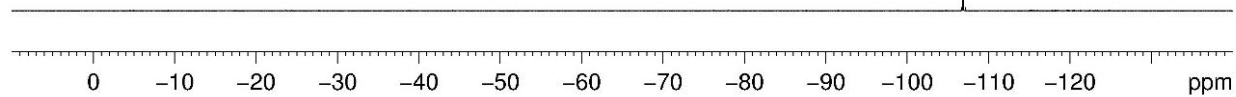



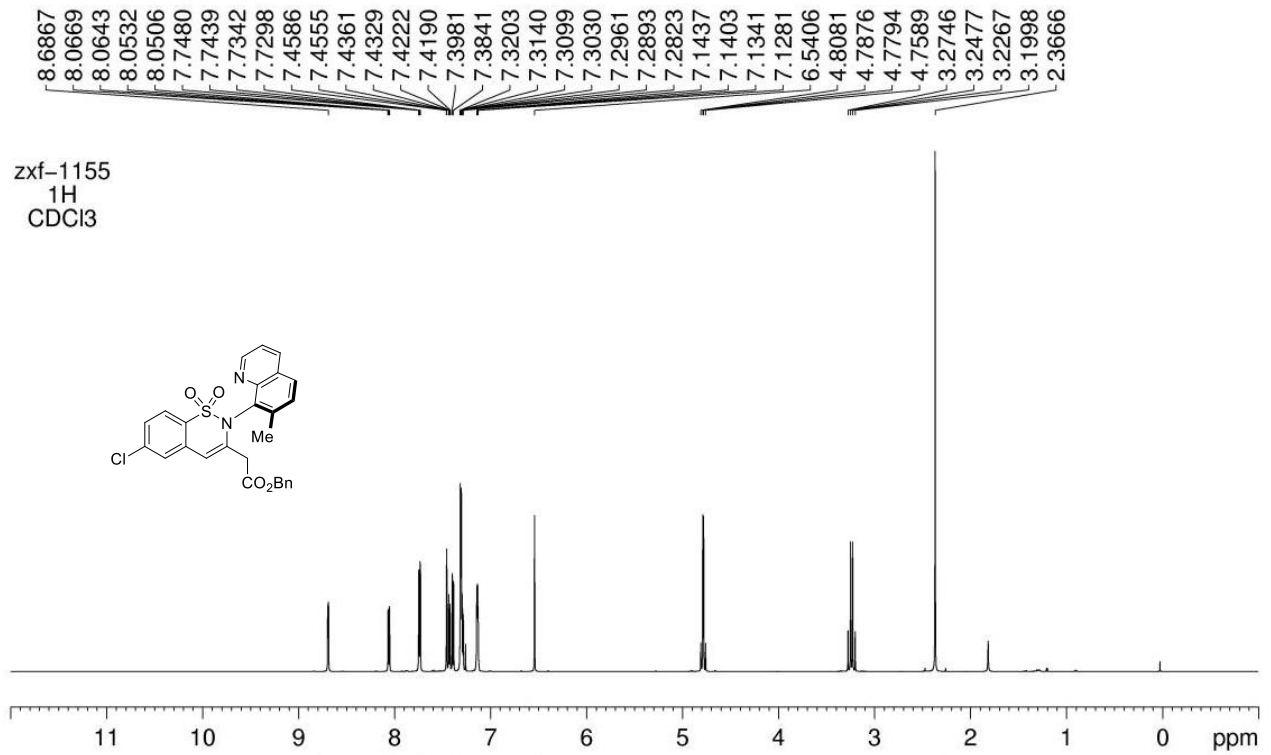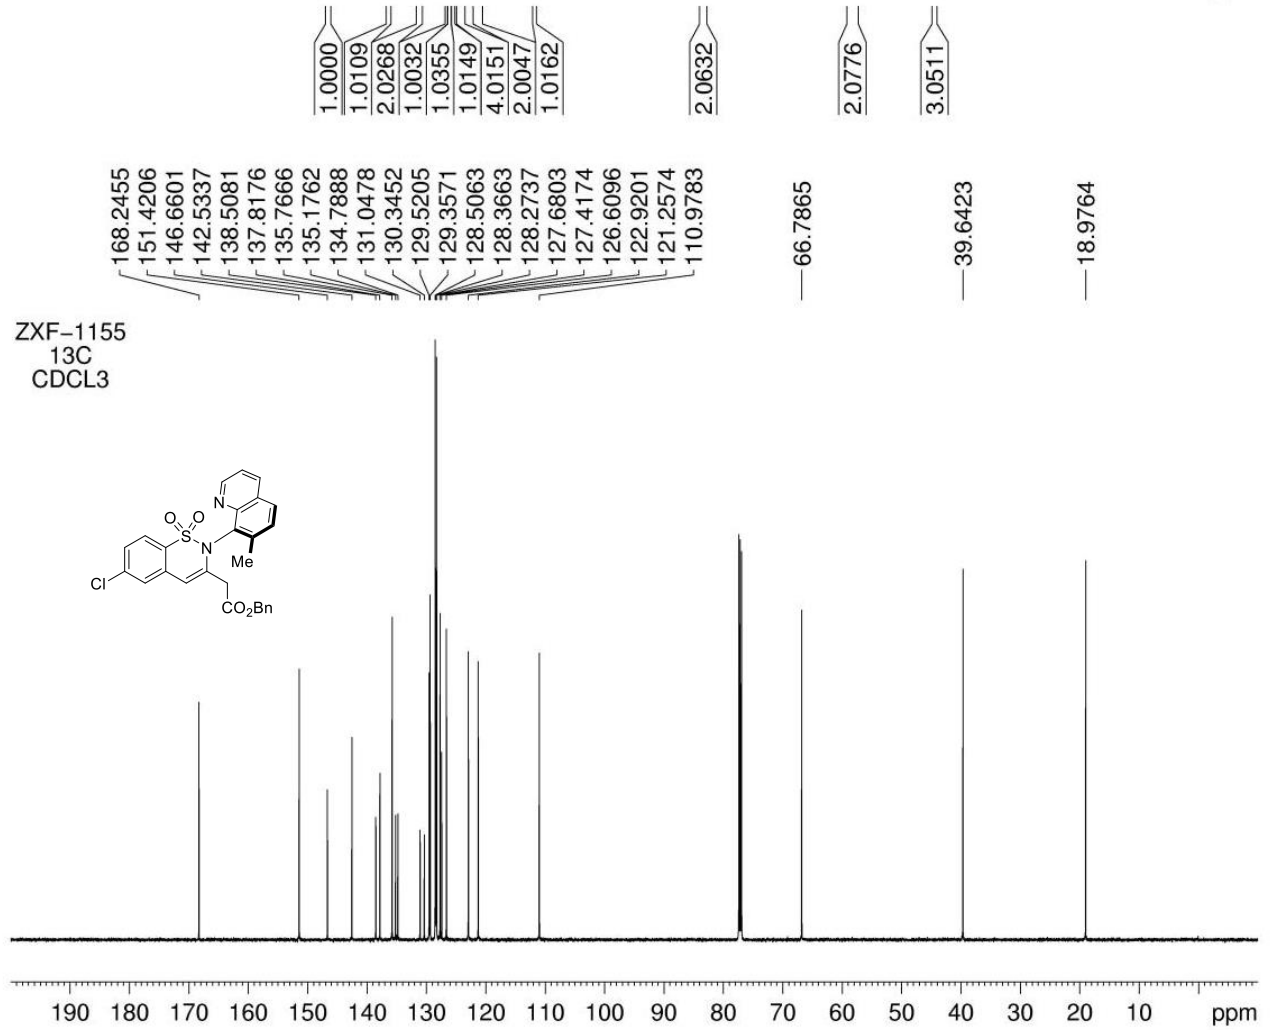

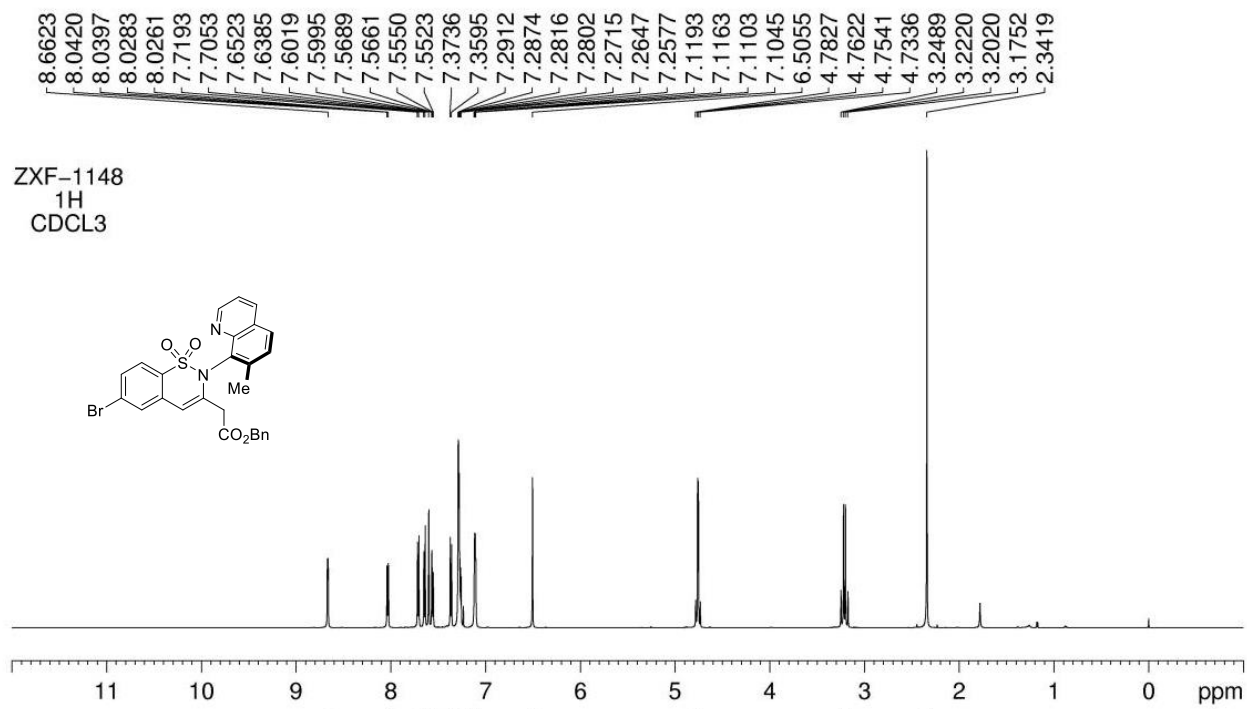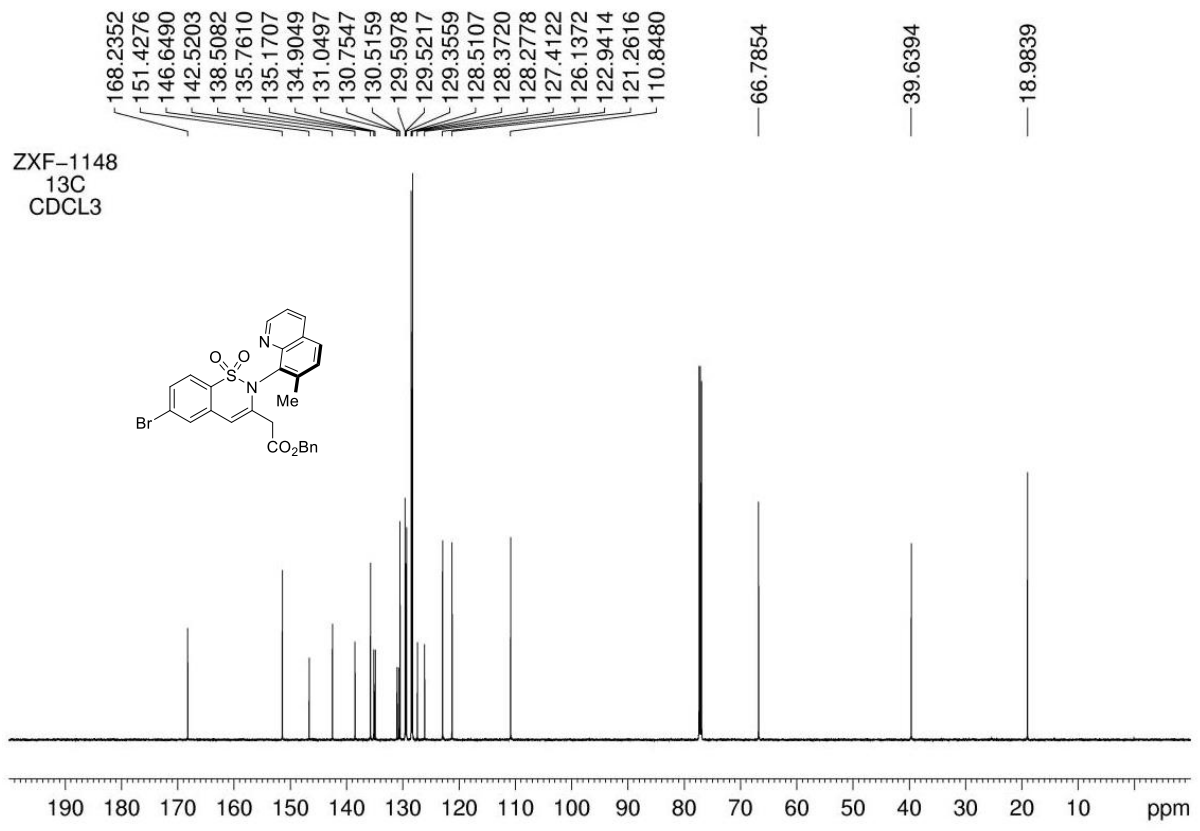

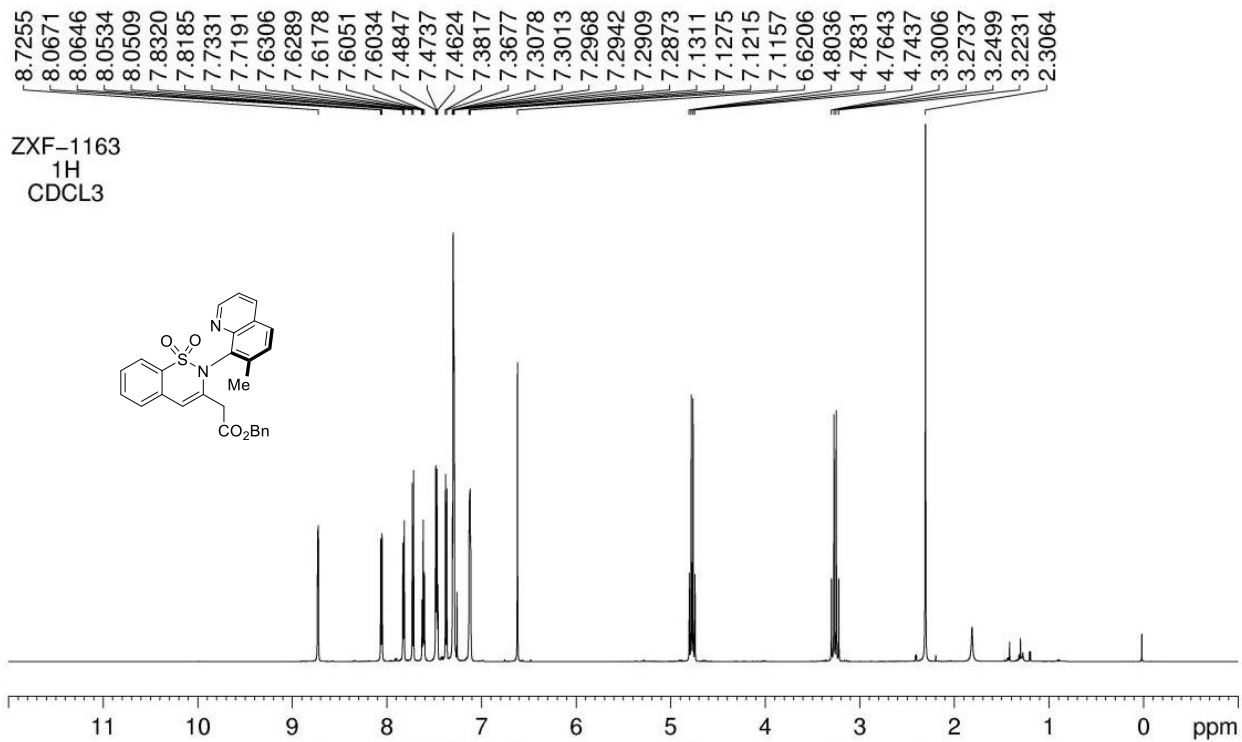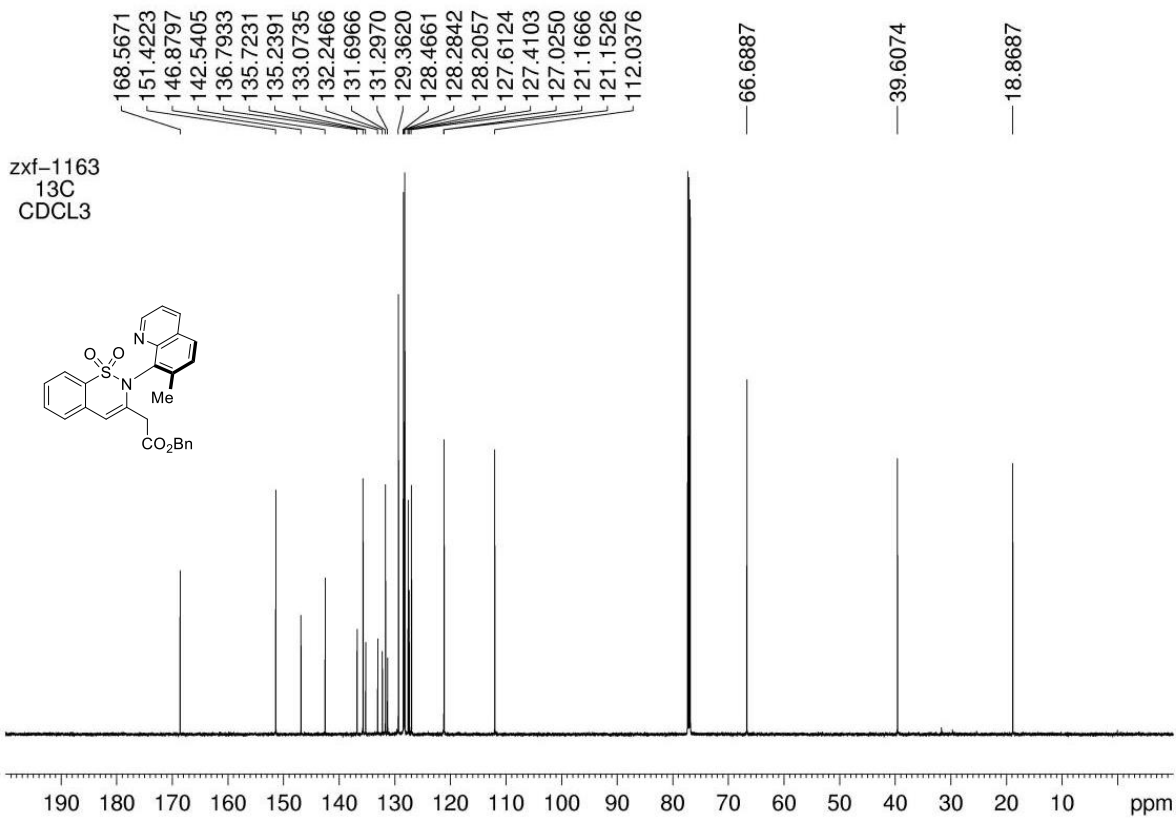

ZXF-1147  
1H  
CDCl3

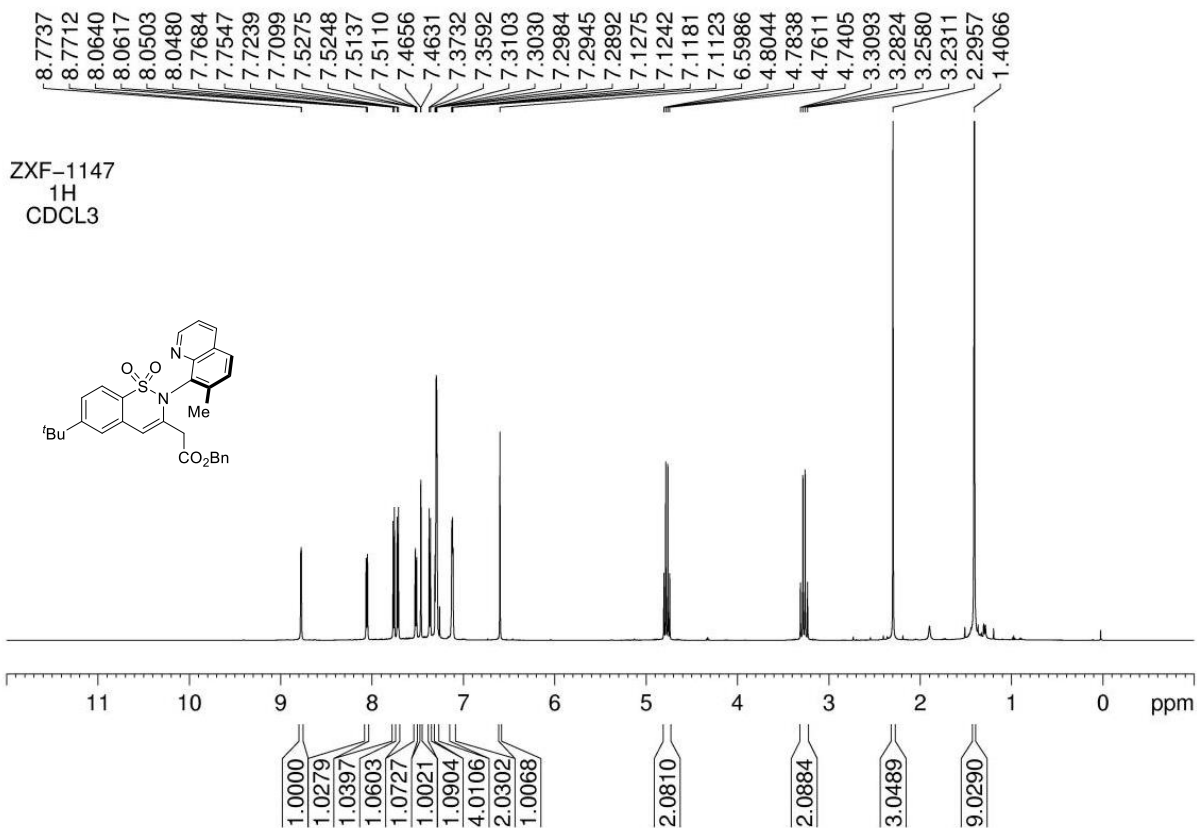

ZXF-1147  
13C  
CDCl3

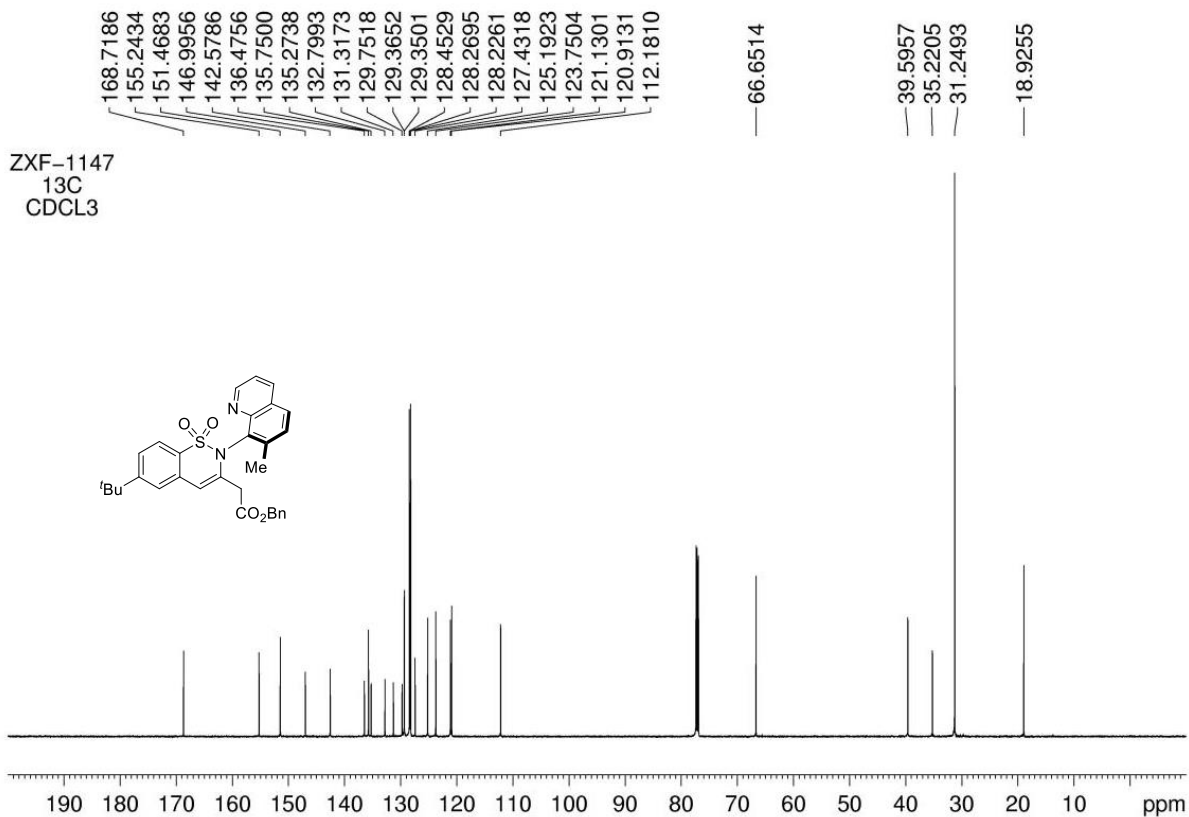

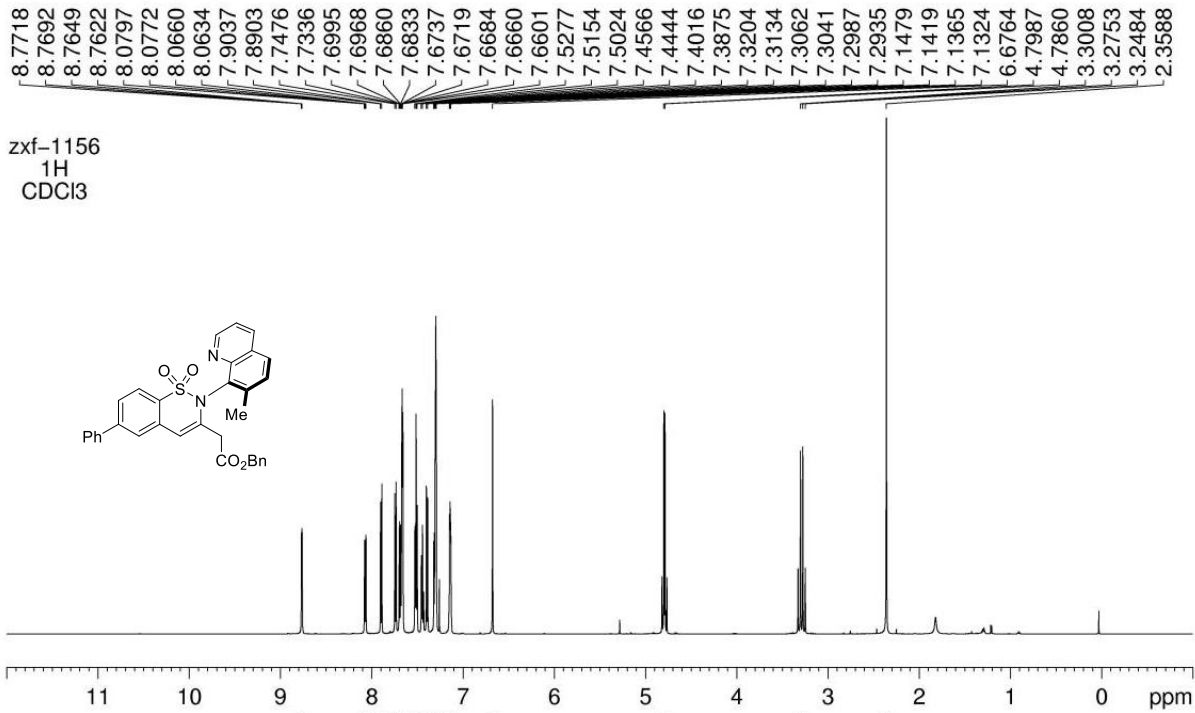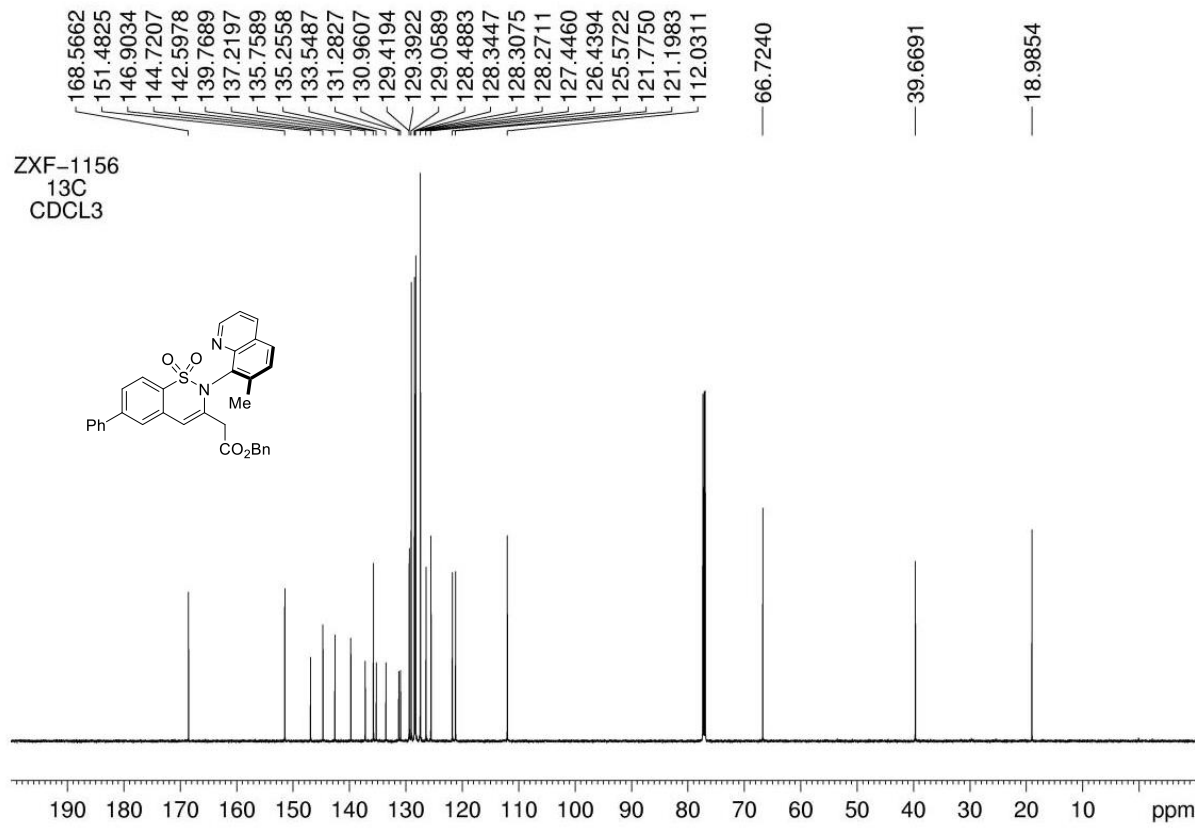

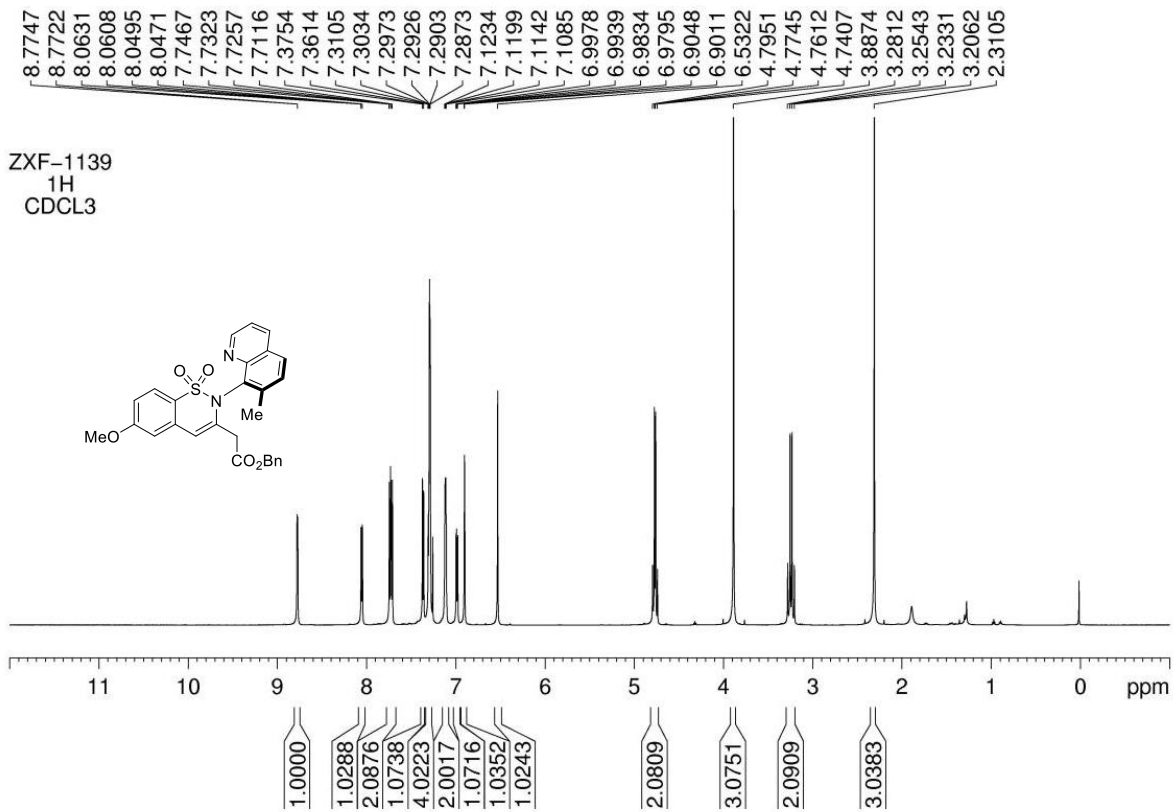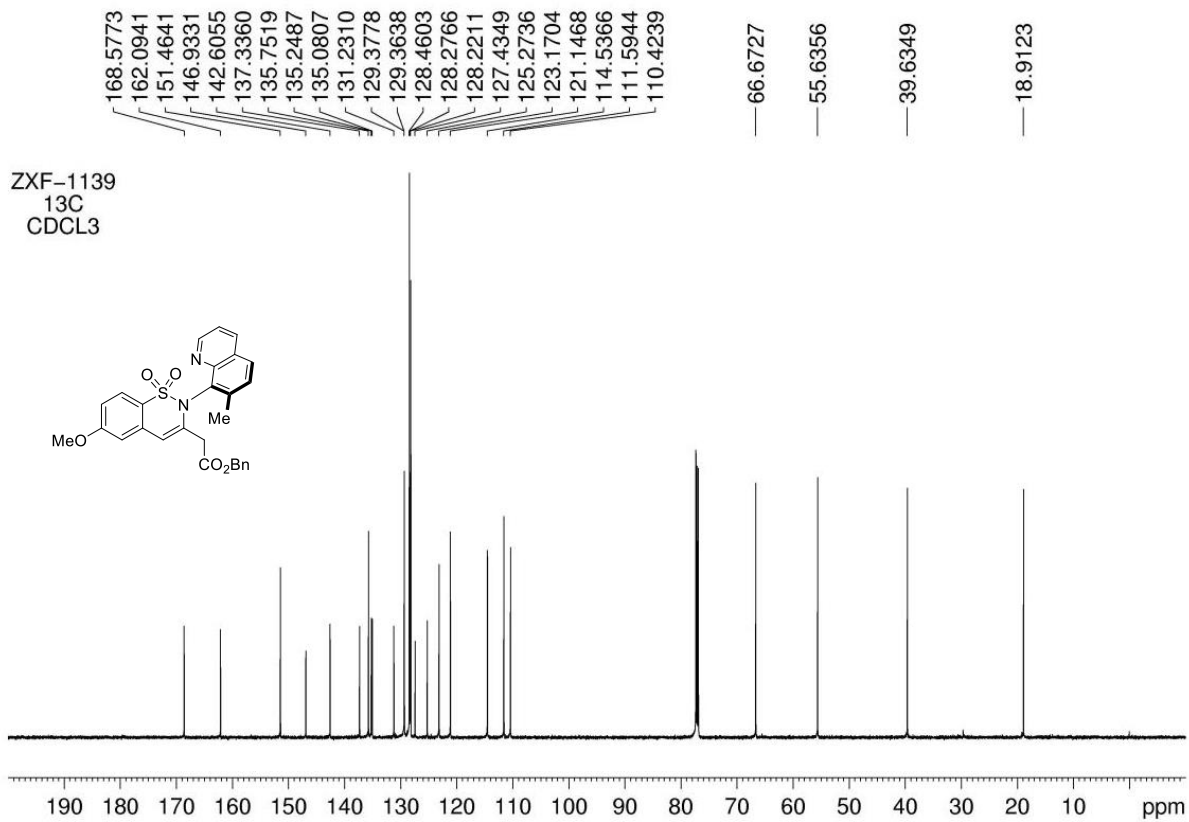

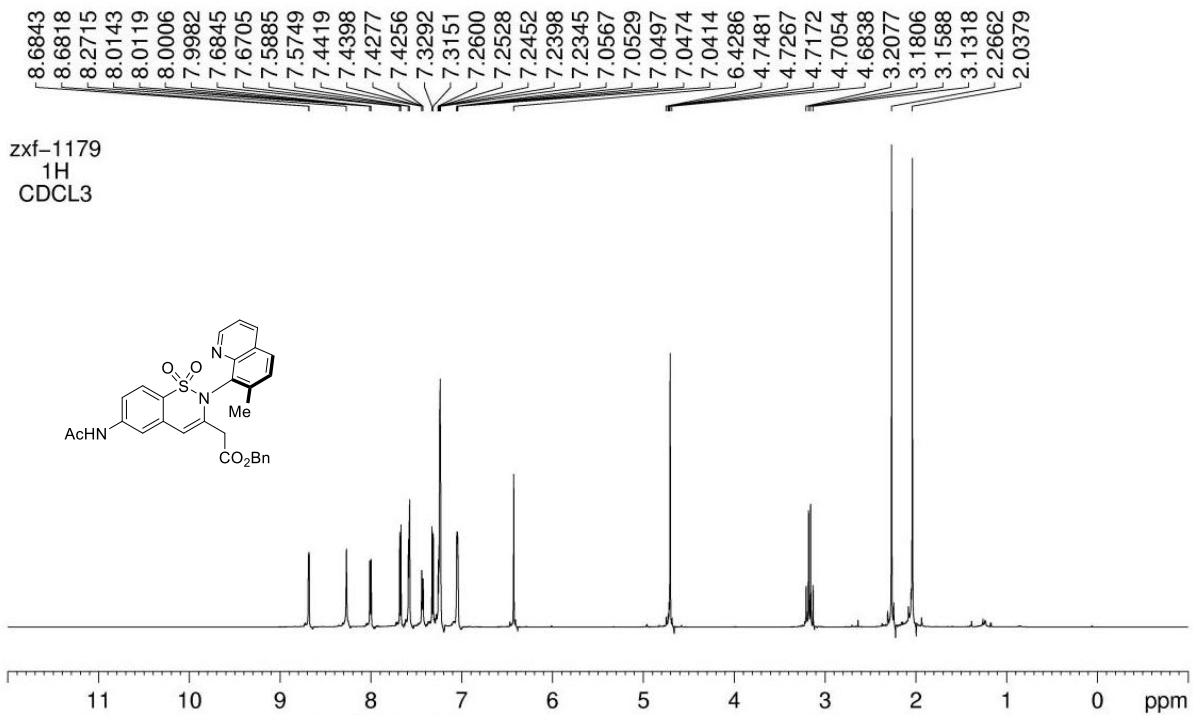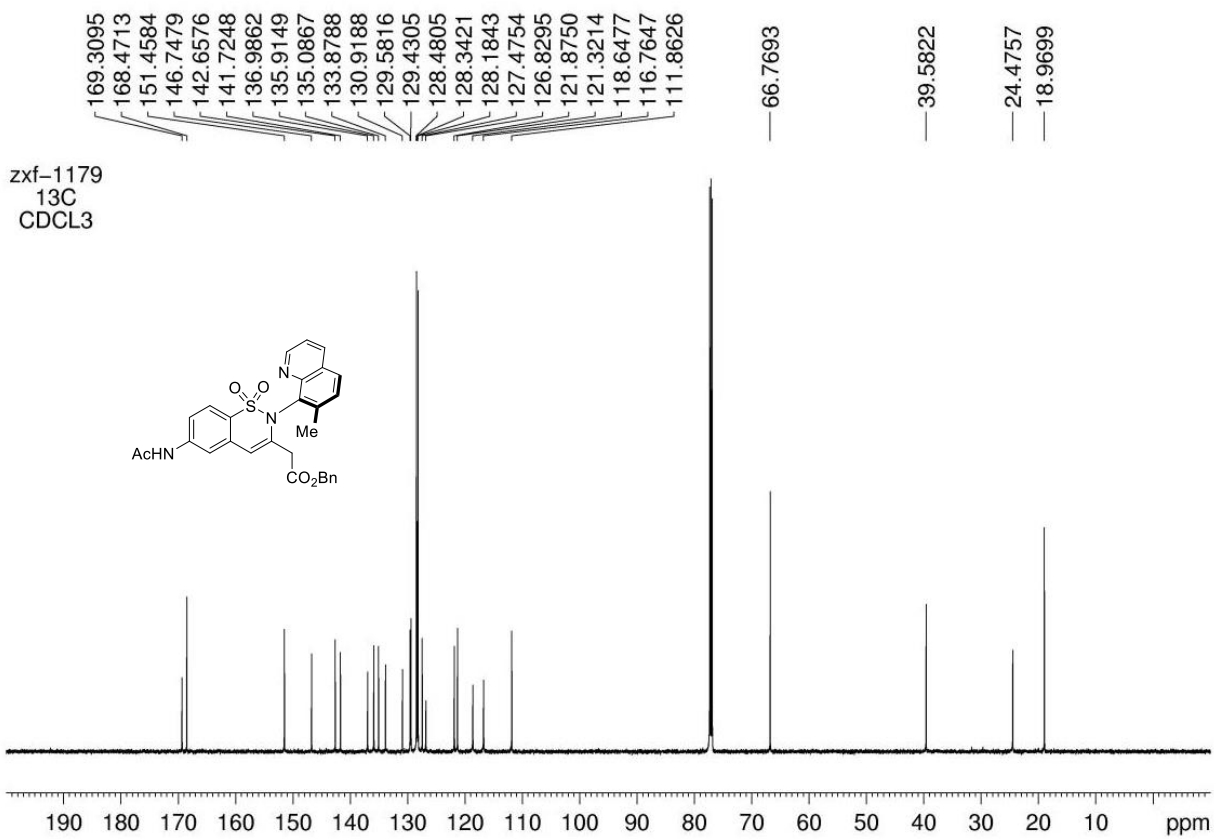

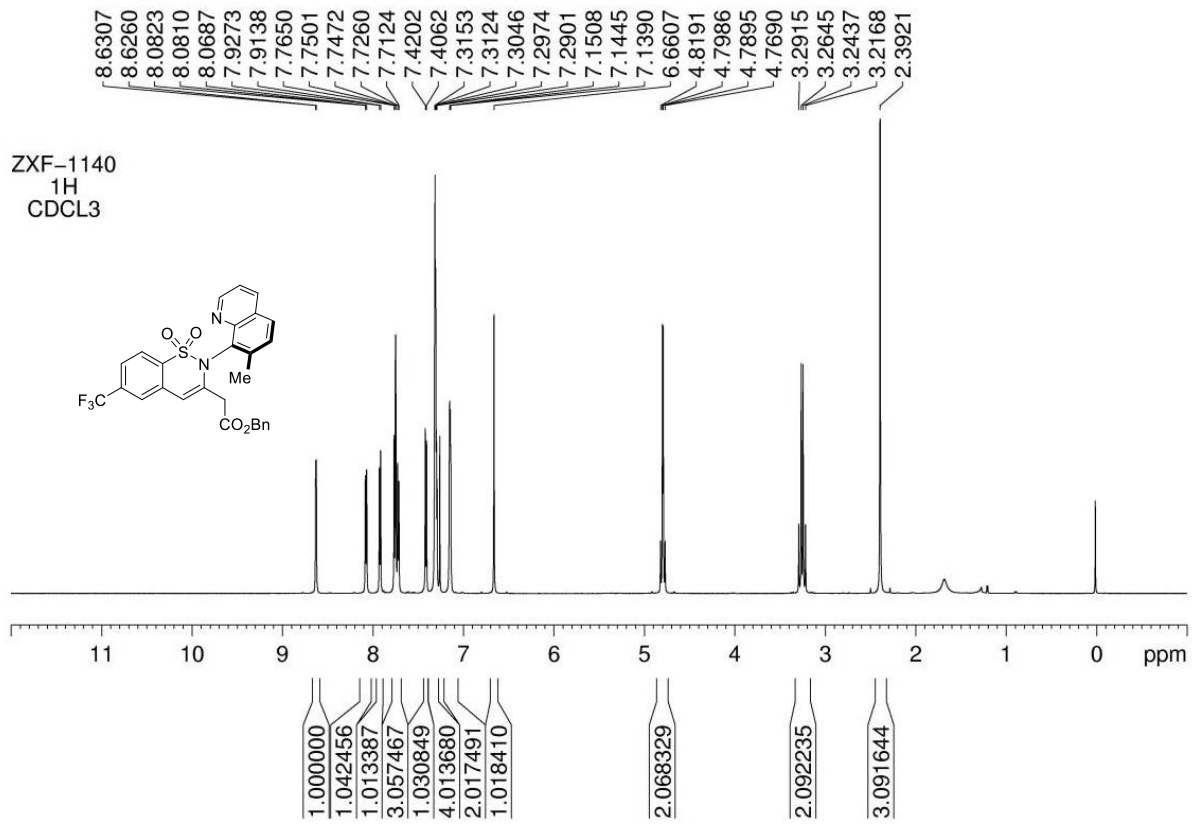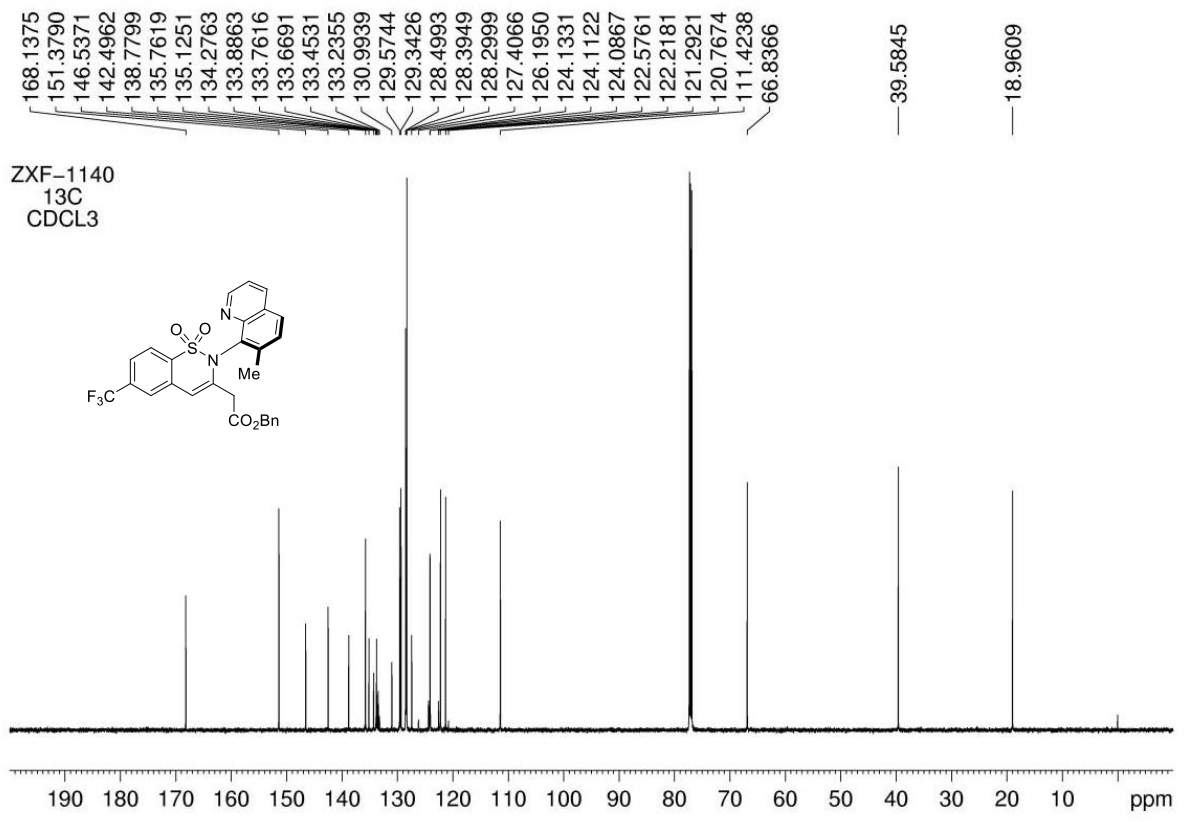



ZXF-1140  
19F  
CDCL3

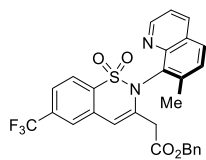

-62.8030

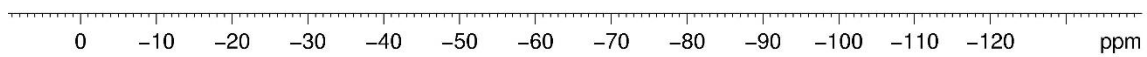

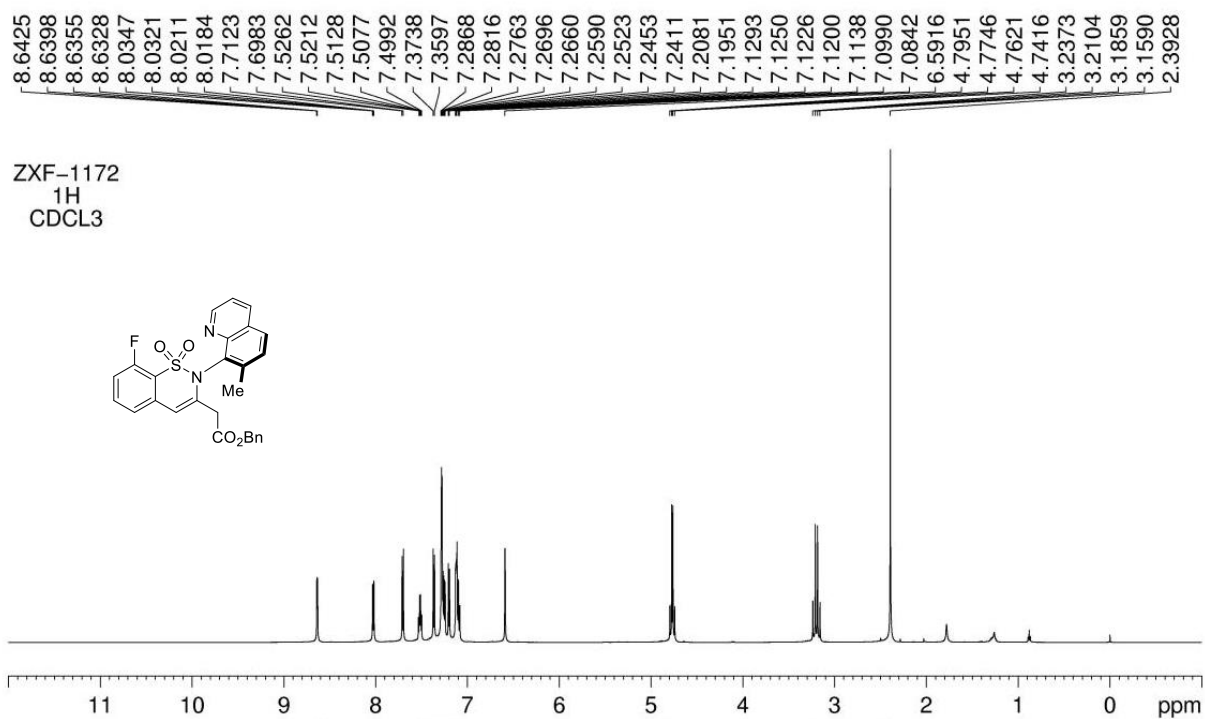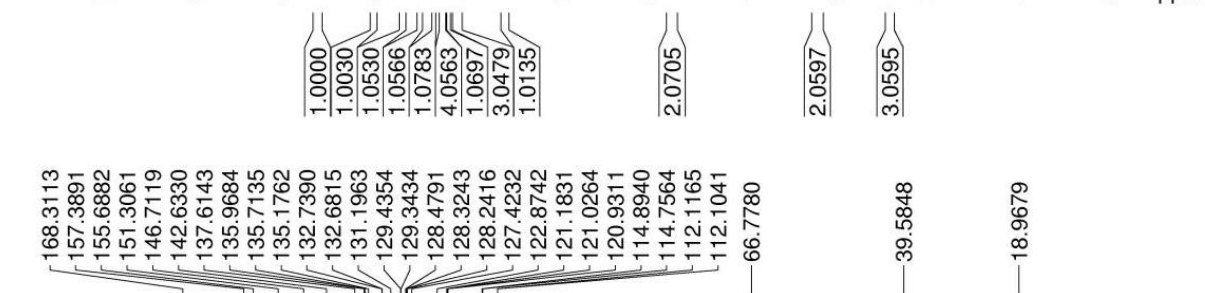

ZXF-1172  
19F  
CDCl3

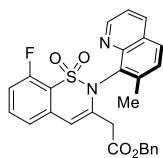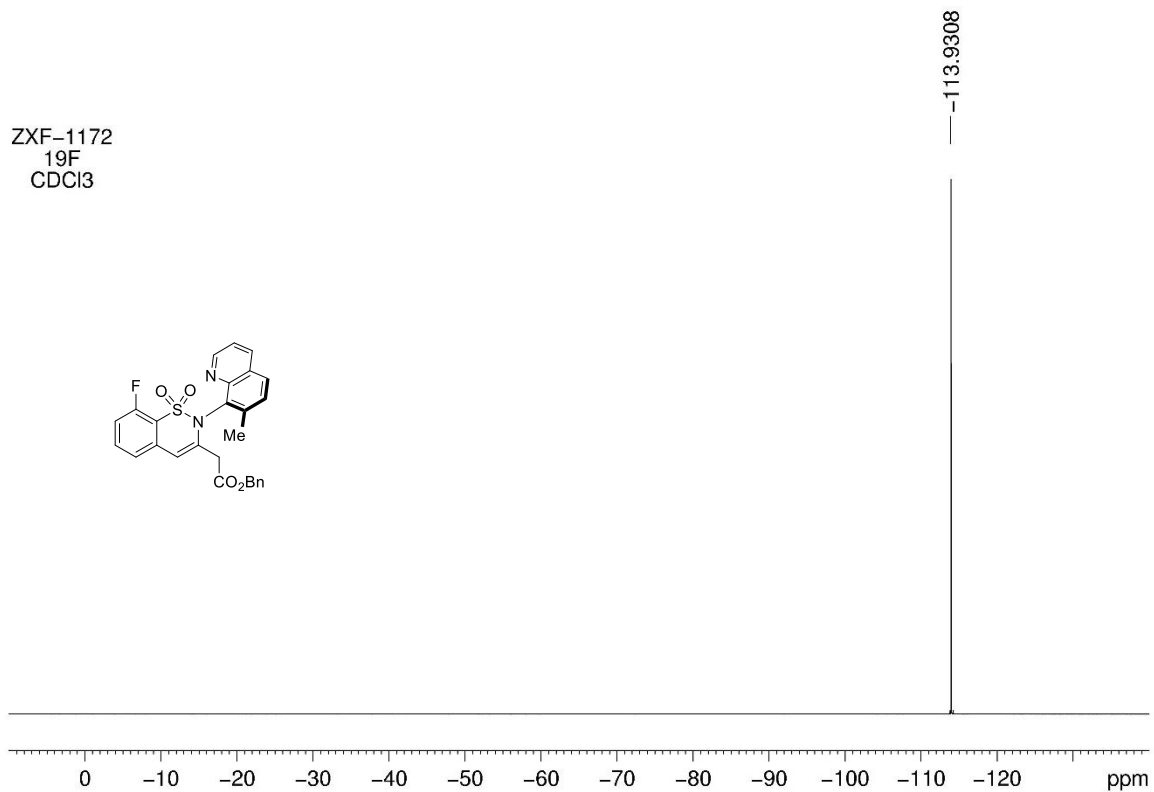

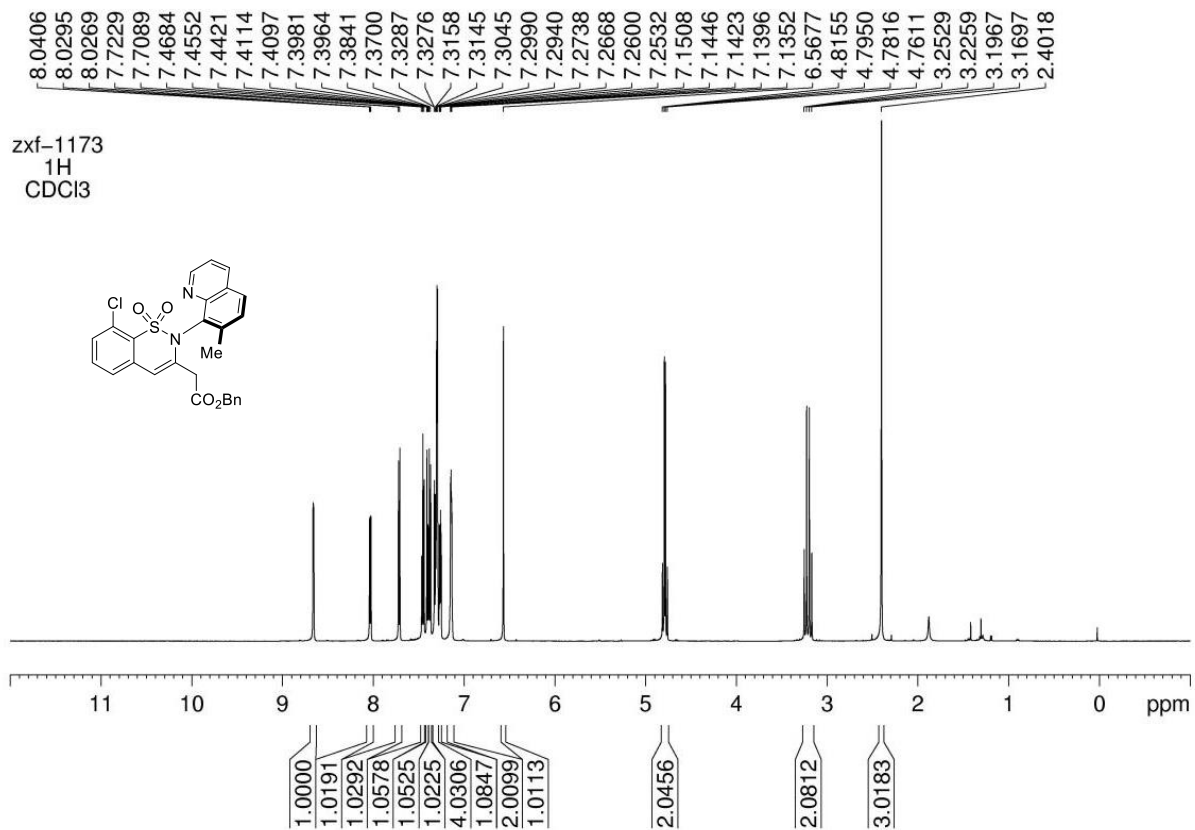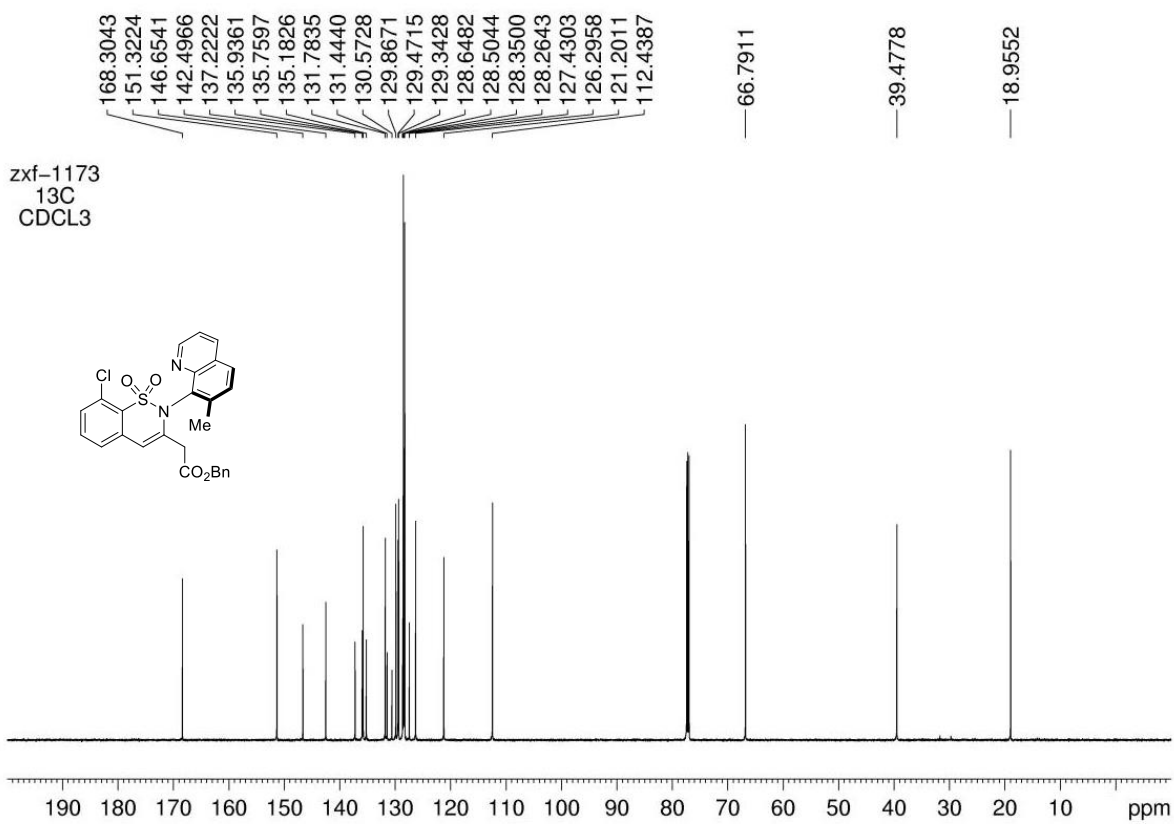

zxf-1164  
1H  
CDCl3

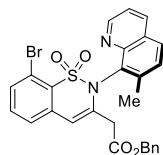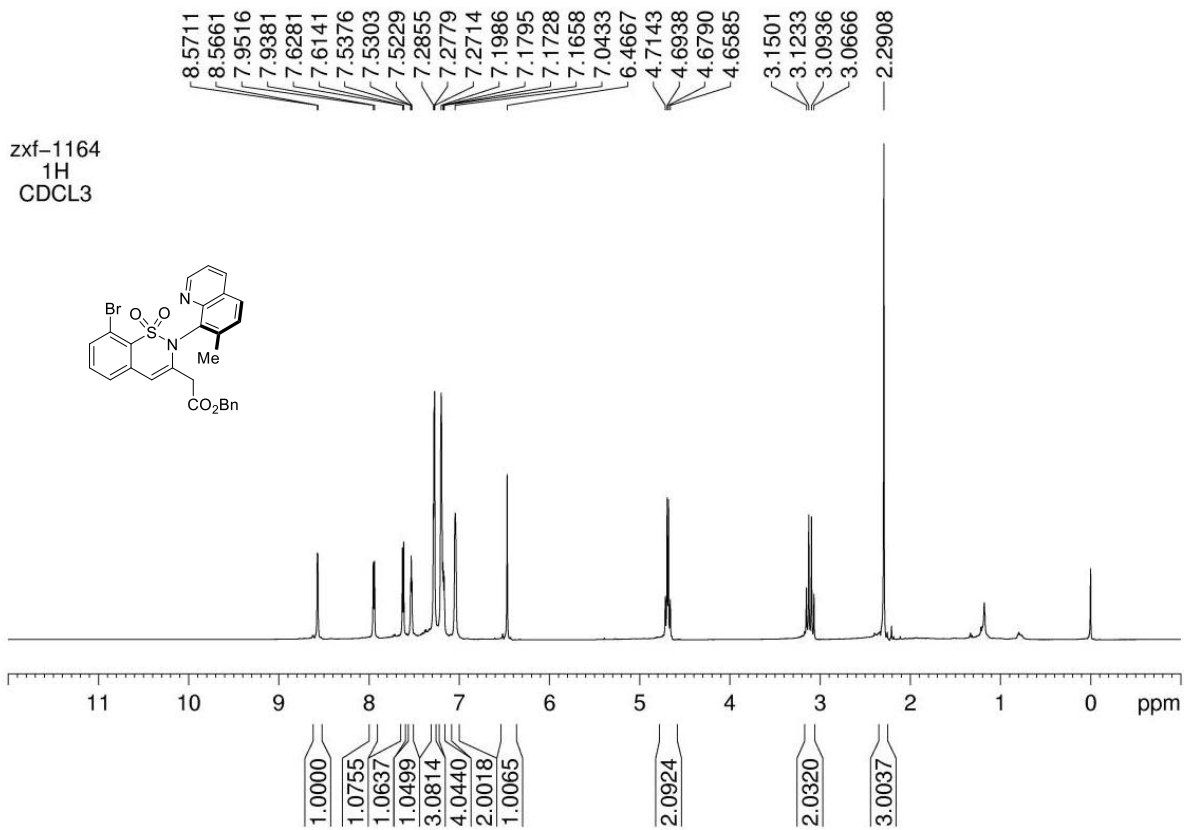

zxf-1164  
13C  
CDCl3

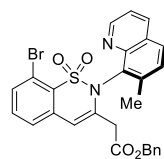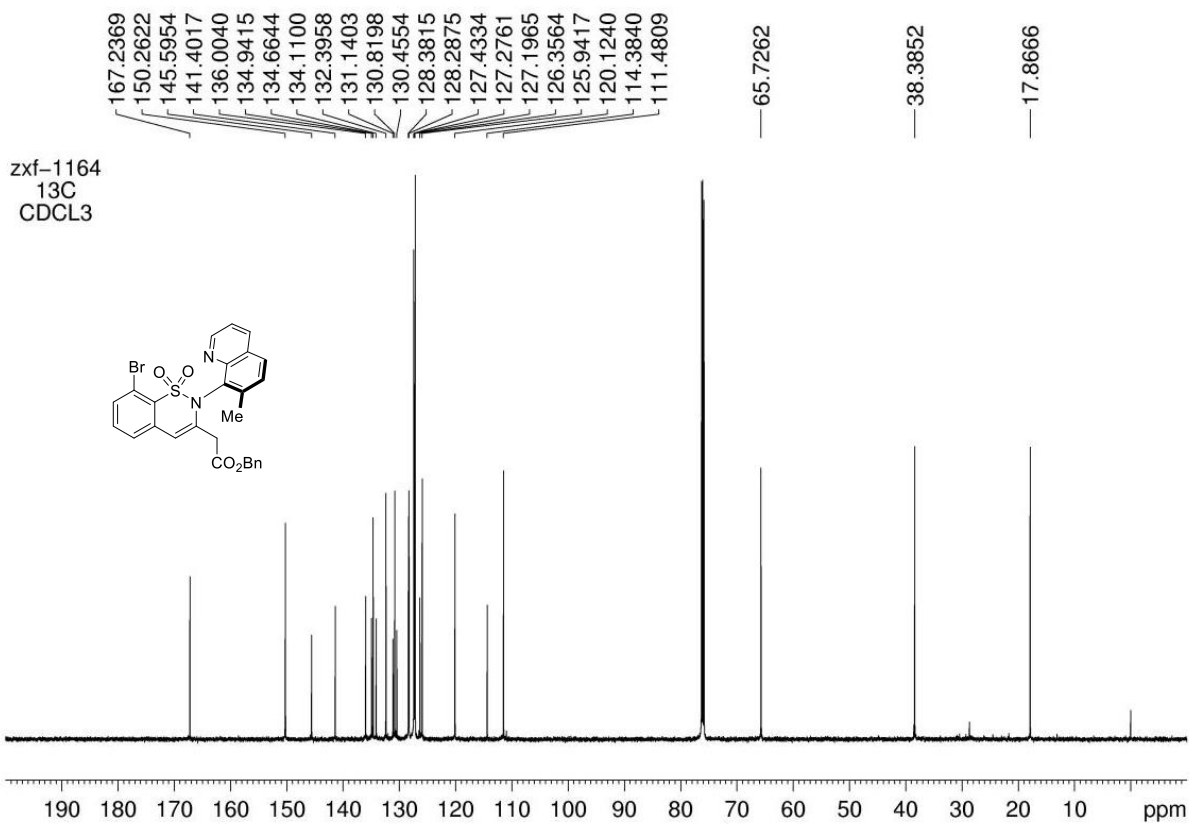

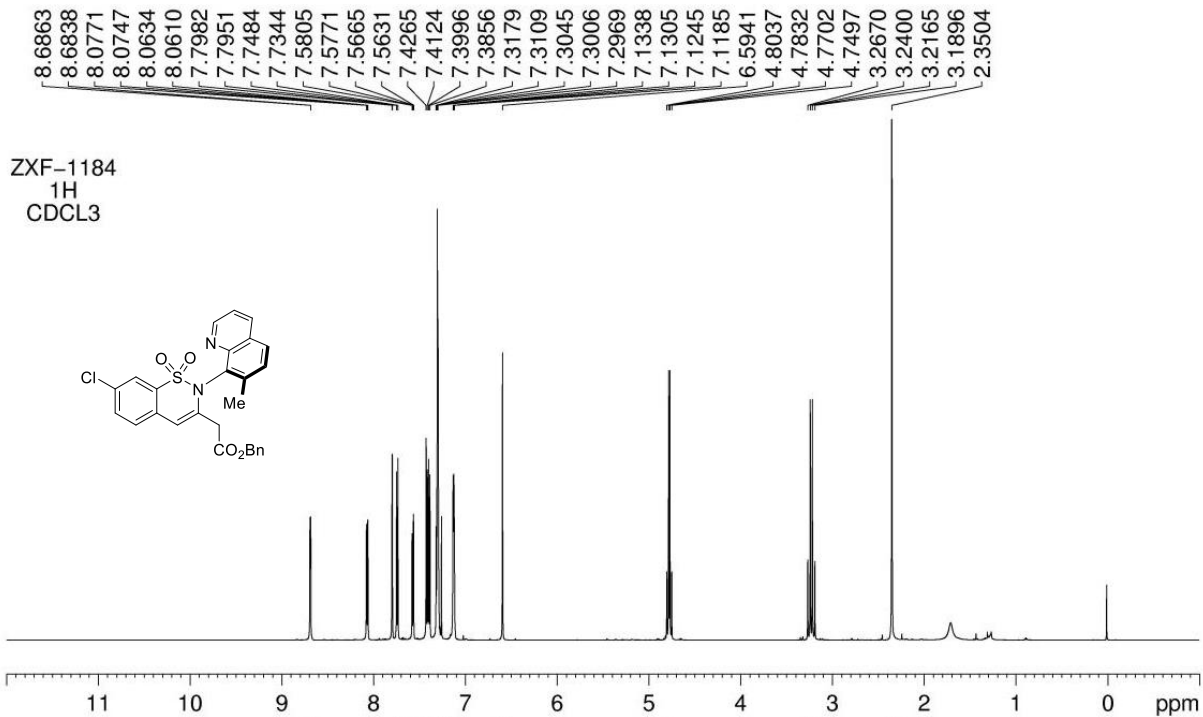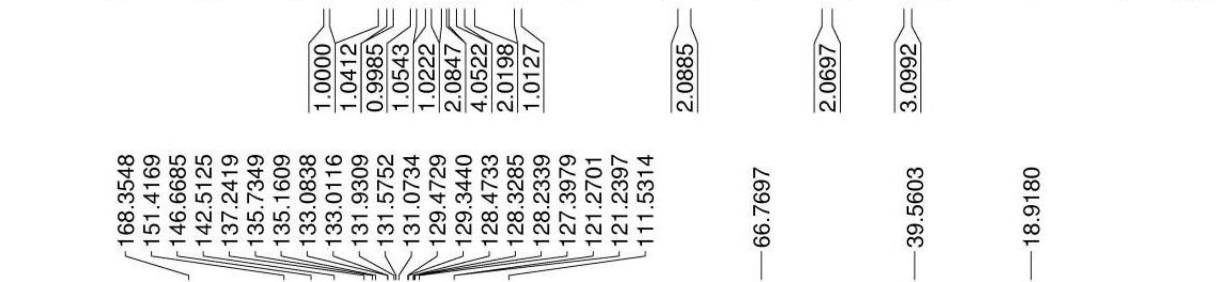

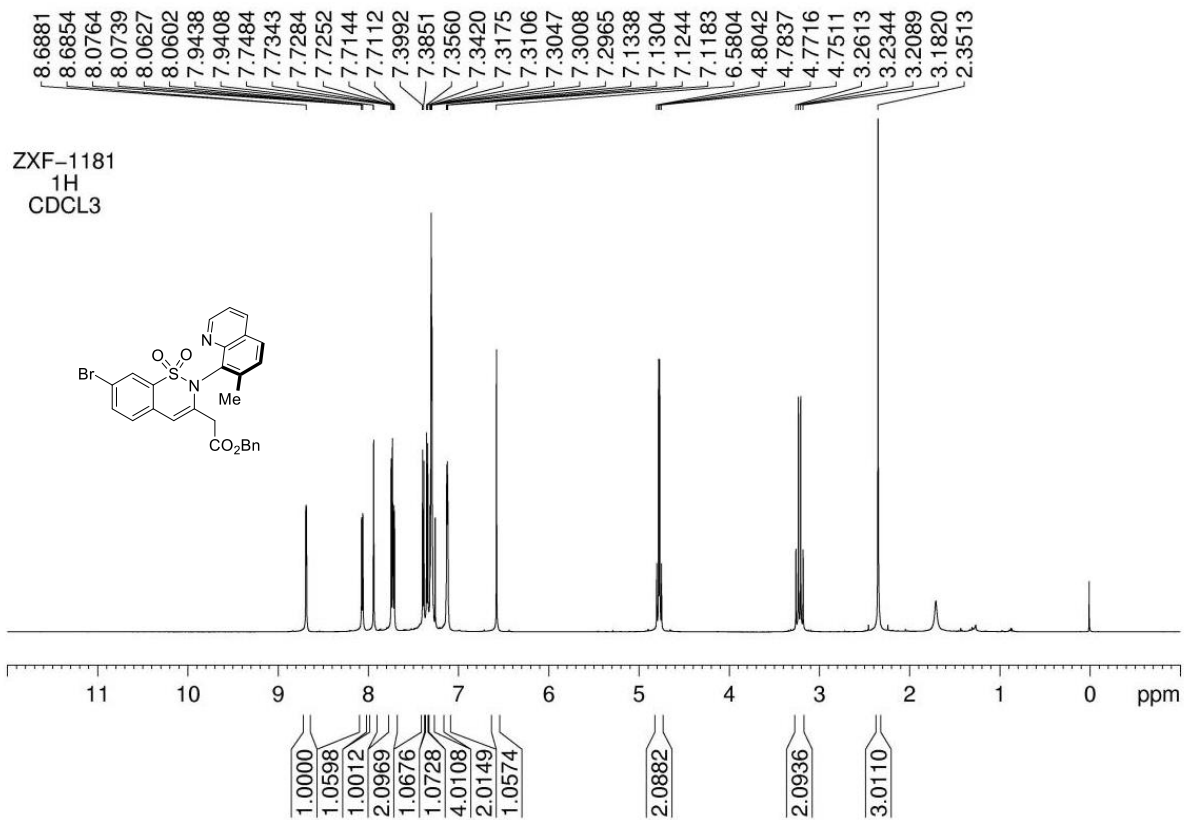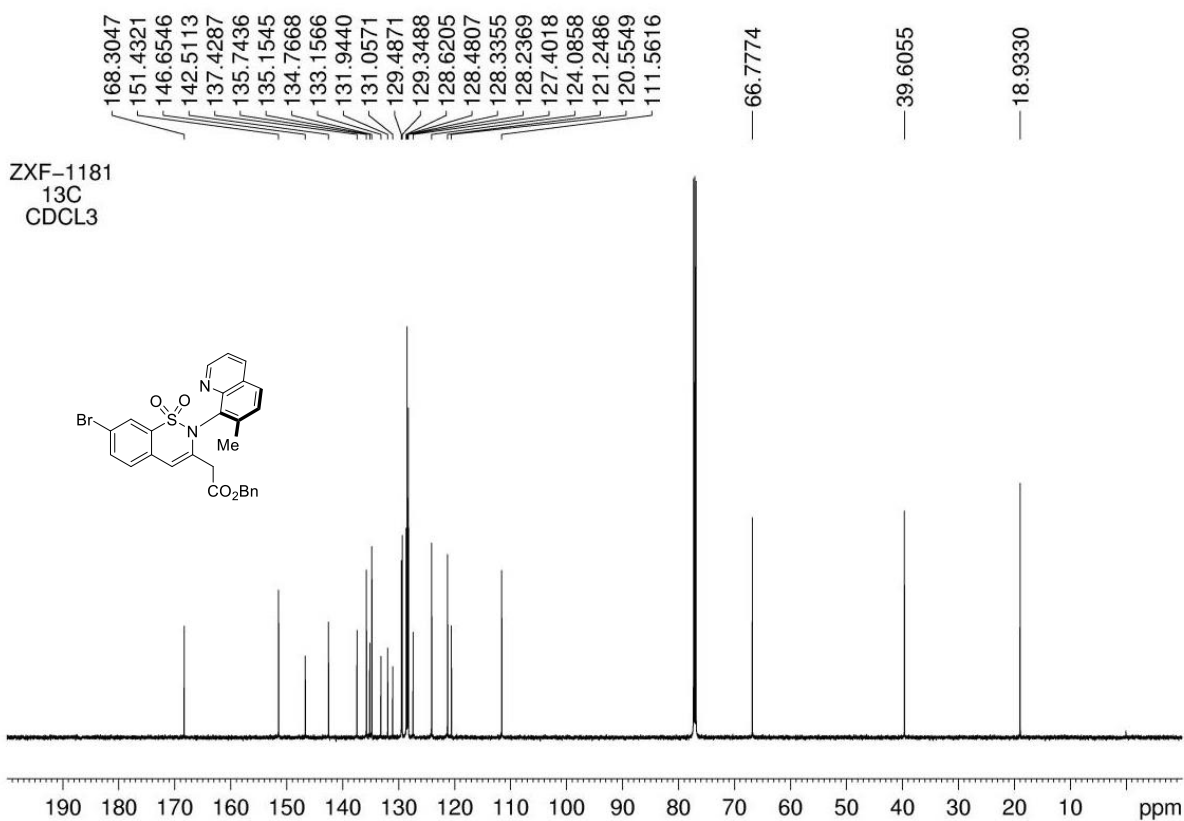

zxf-1178  
1H  
CDCl3

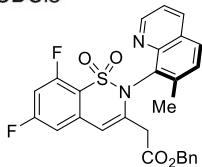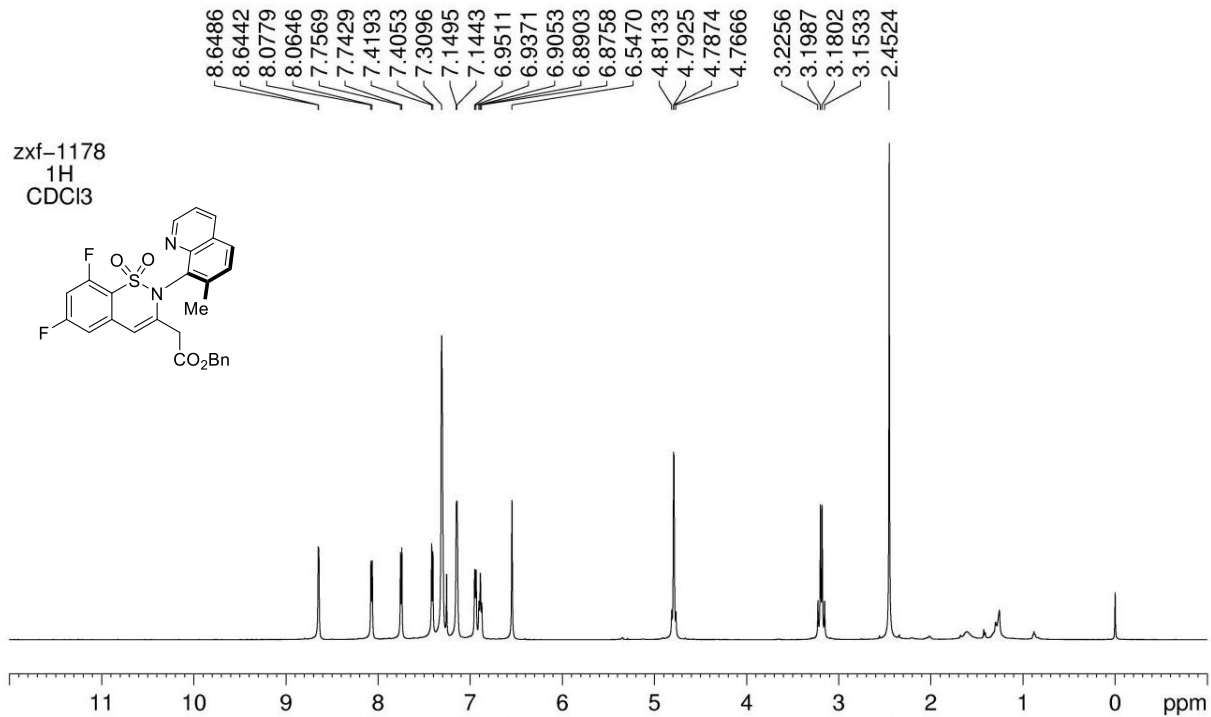

163.1689  
158.5096  
158.4202  
156.7910  
156.7016  
151.3284  
146.5562  
142.7020  
139.1012  
137.5327  
137.4646  
135.7296  
135.0753  
130.9316  
129.5262  
129.3606  
128.5056  
128.4036  
128.3055  
127.4304  
121.2563  
117.4918  
117.4183  
111.4416  
109.3459  
109.3198  
109.1940  
109.1708  
103.7995  
103.6353  
103.4601  
66.8855  
39.6106  
19.0492

zxf-1178  
13C  
CDCl3

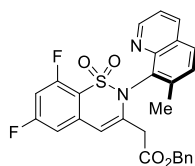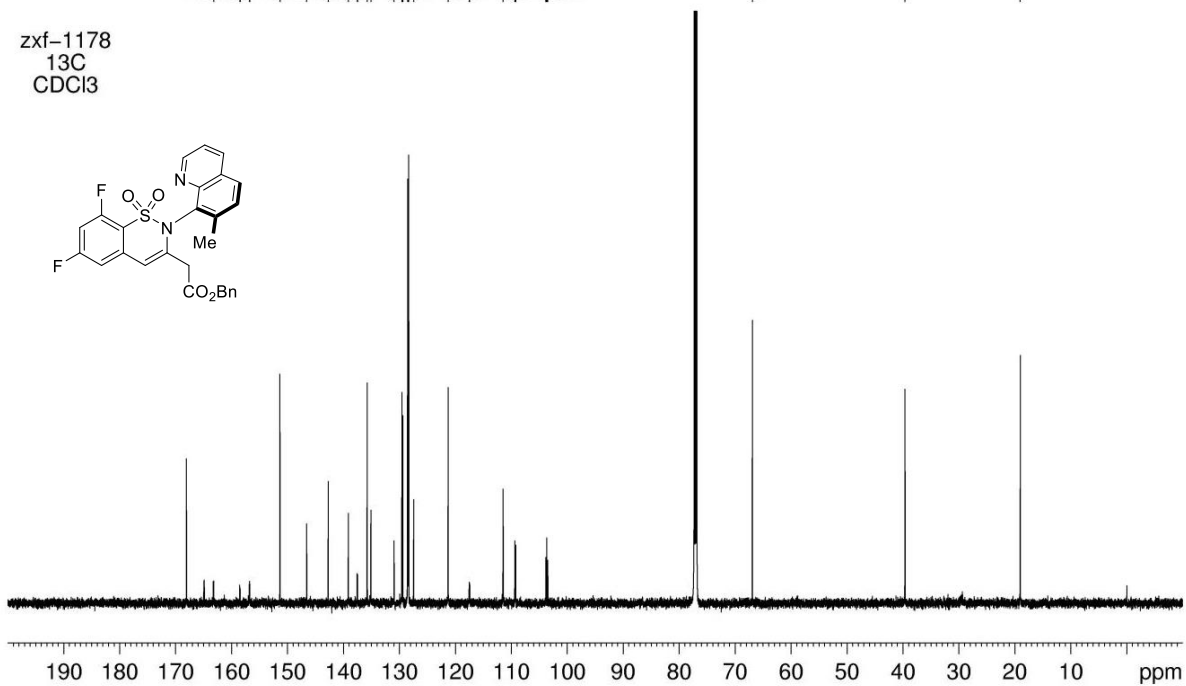



ZXF-1178  
19F  
CDCl3

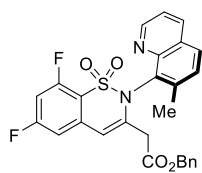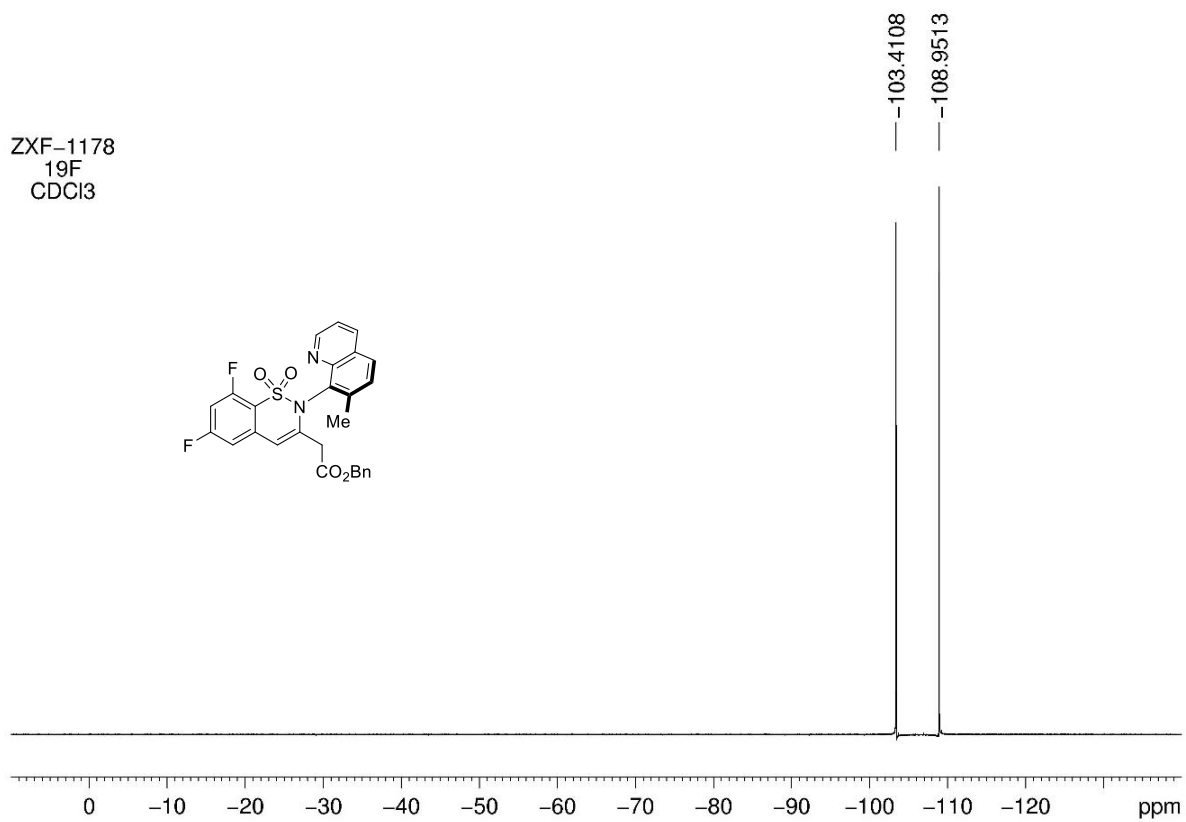

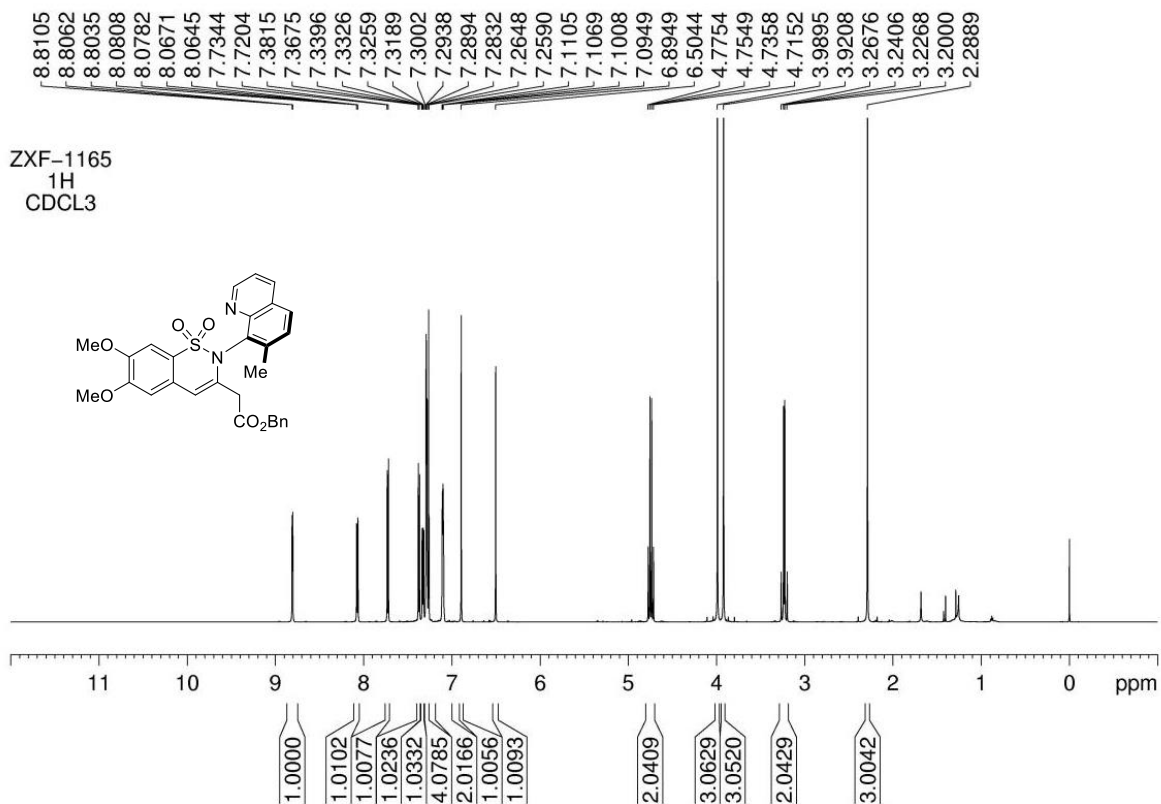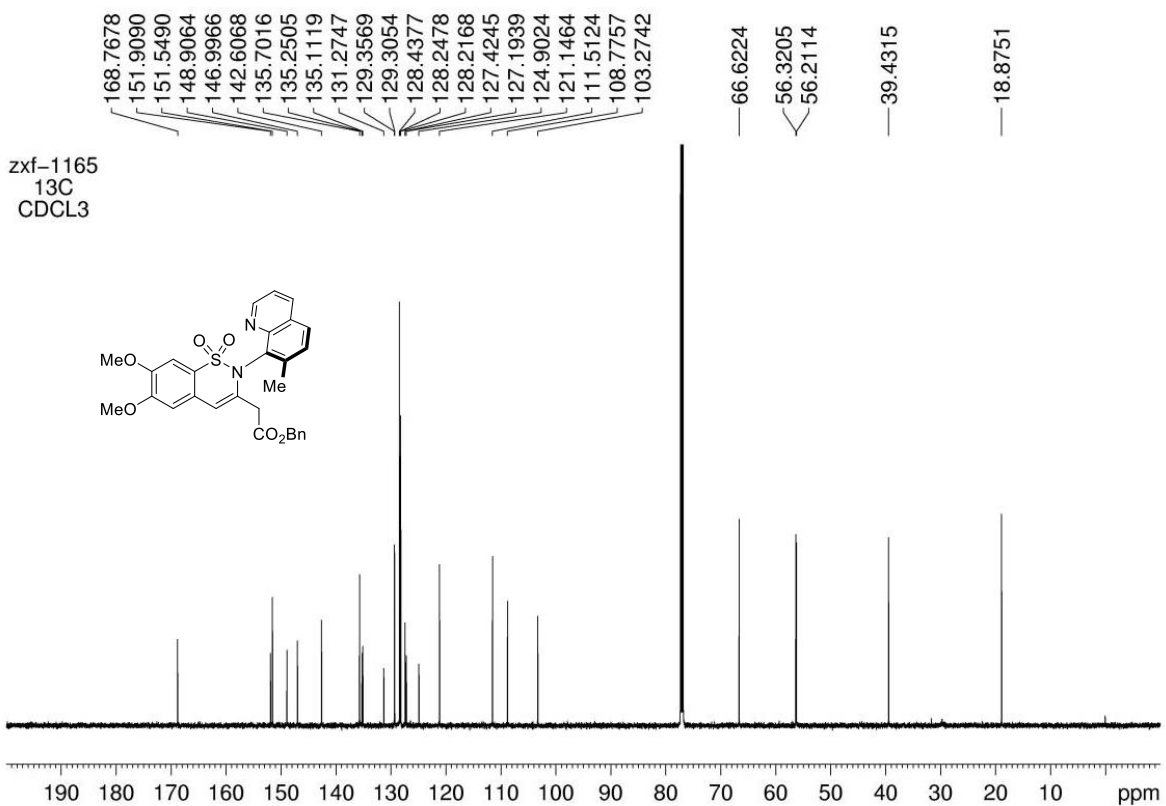

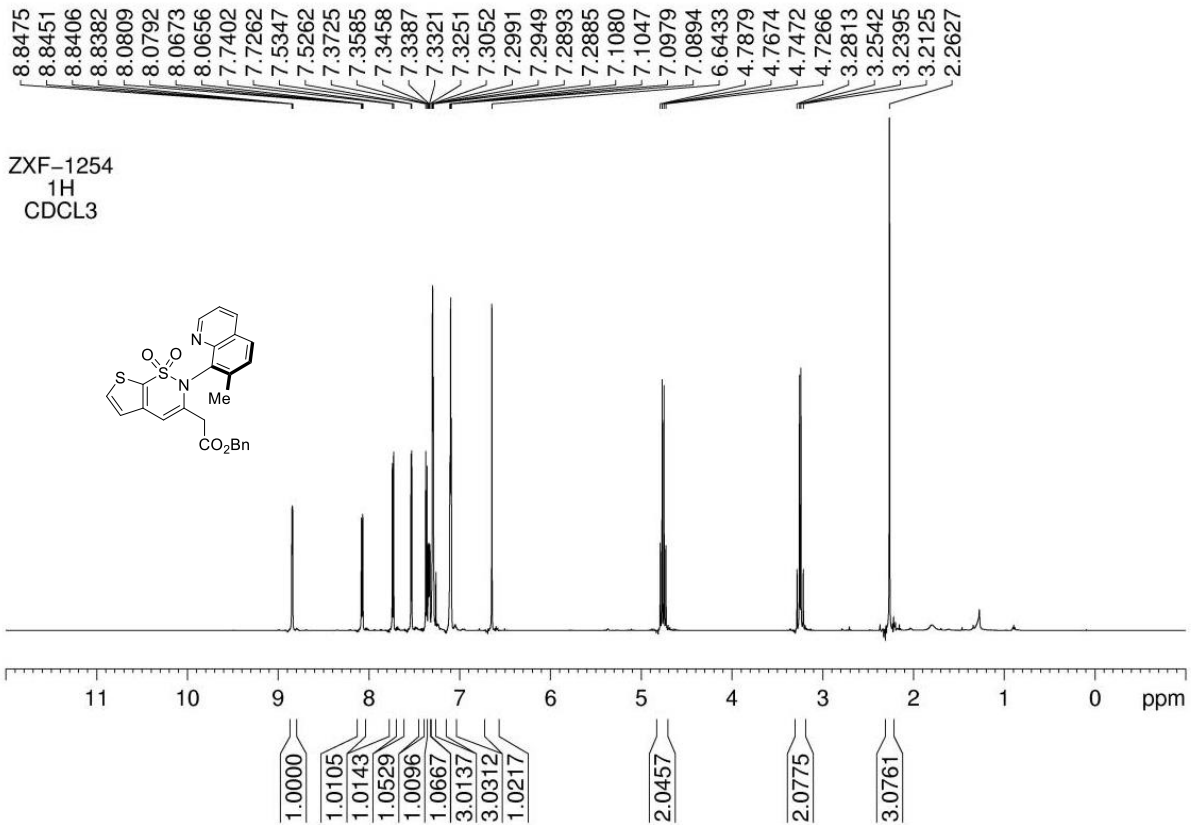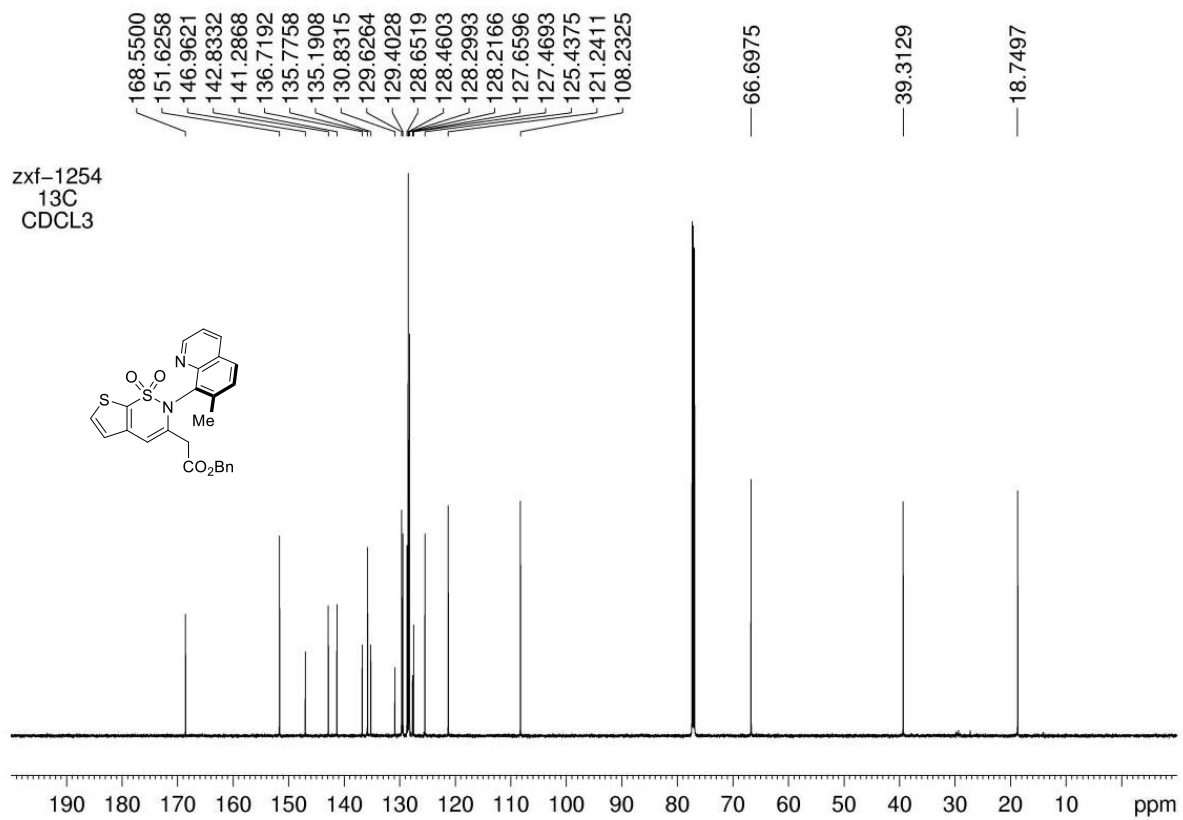

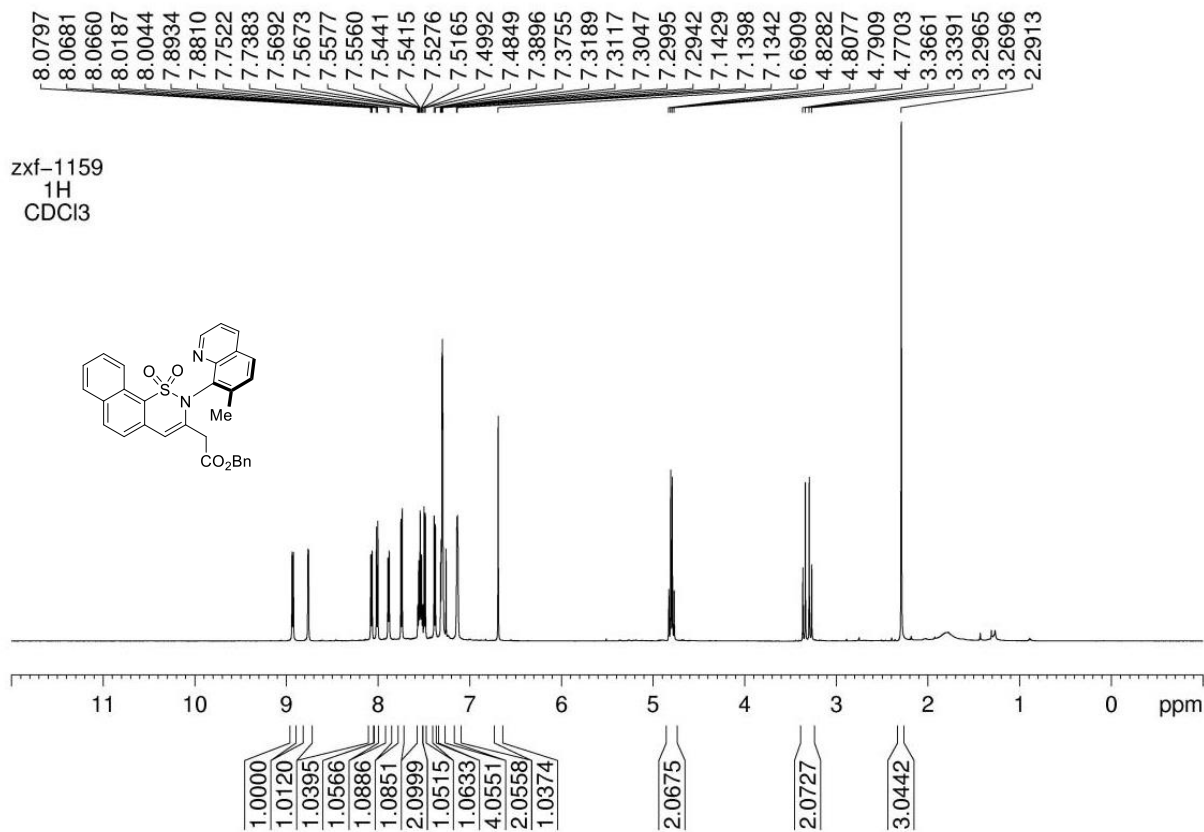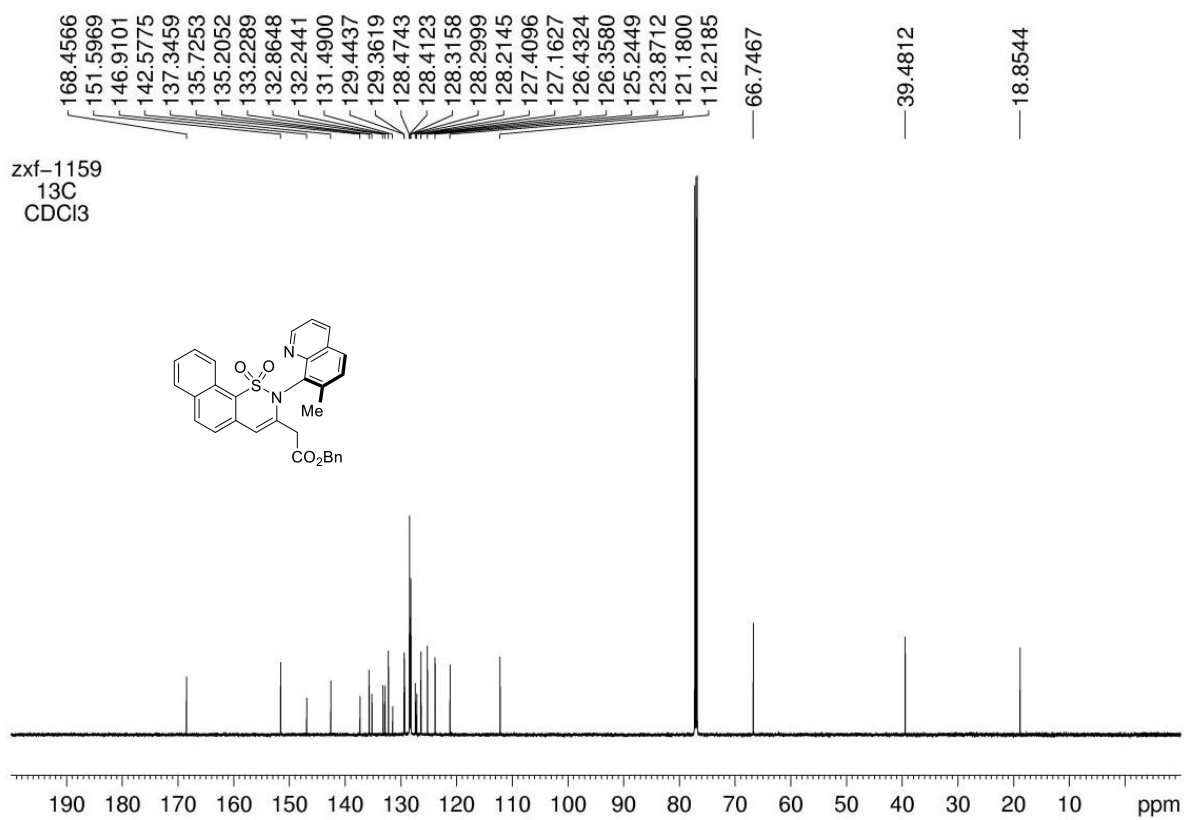

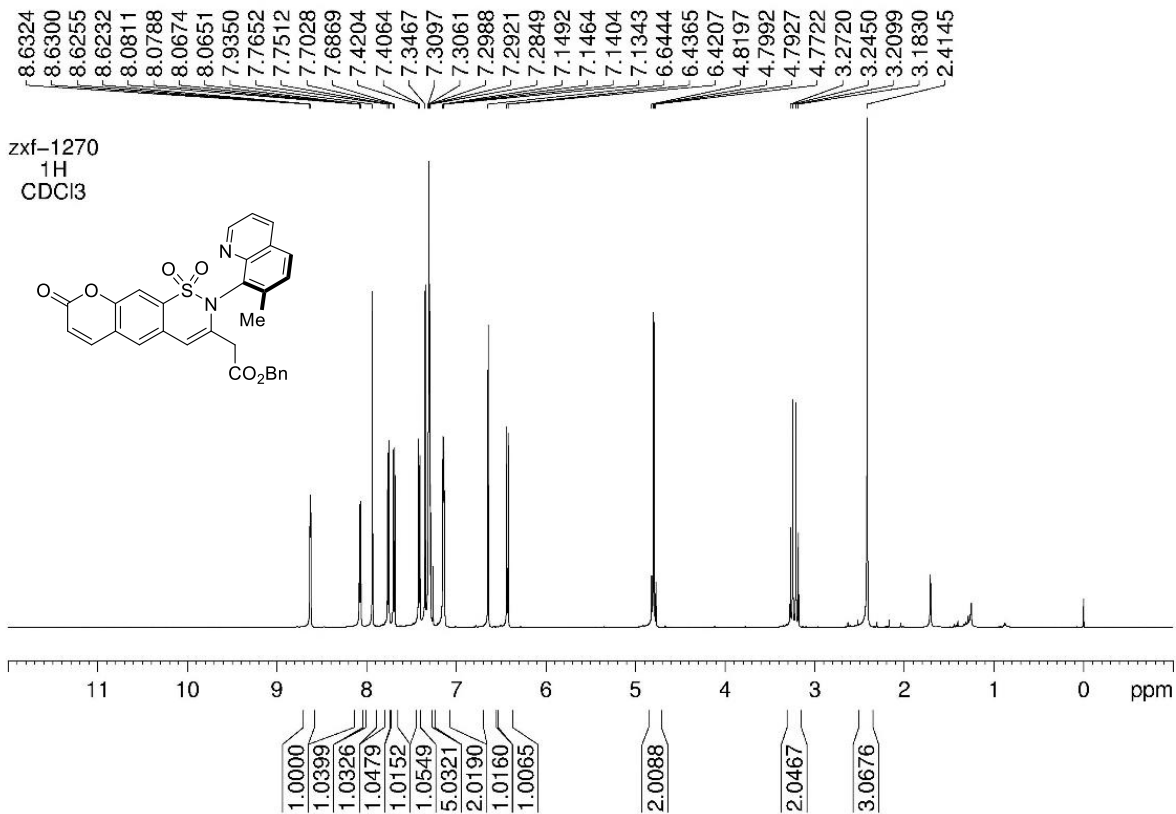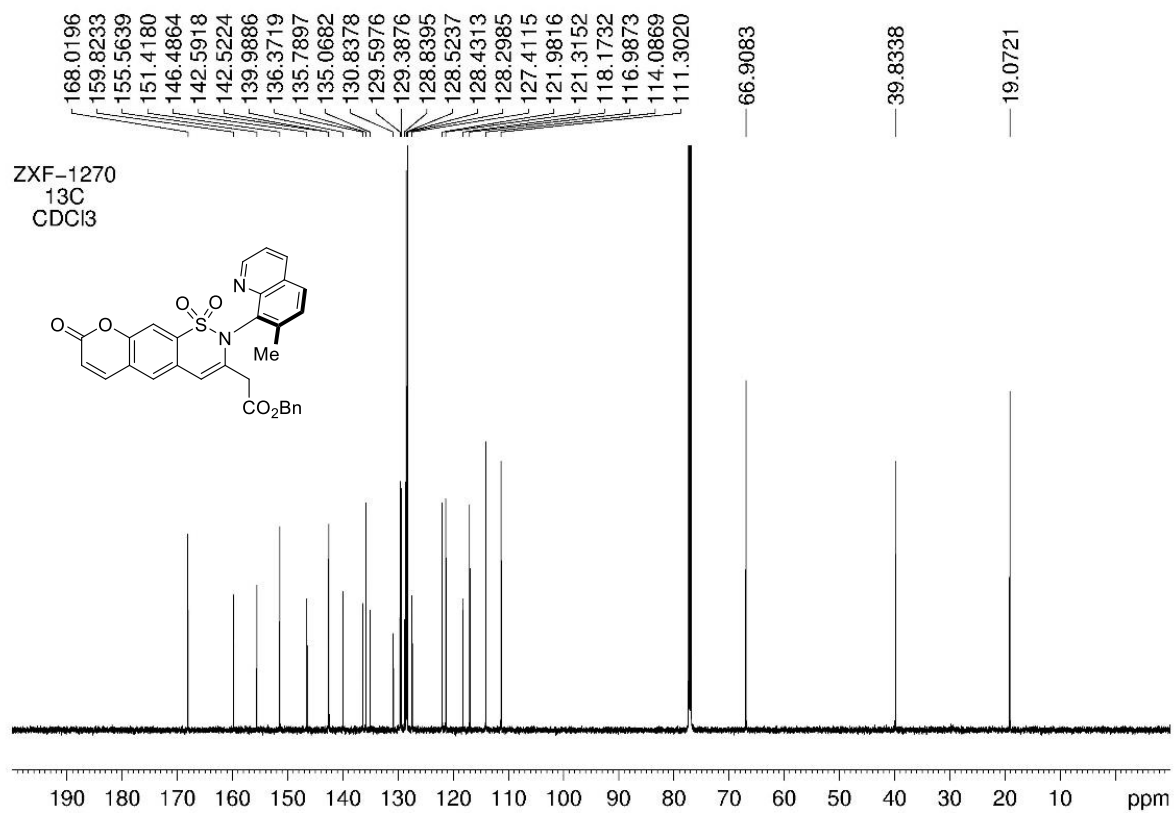

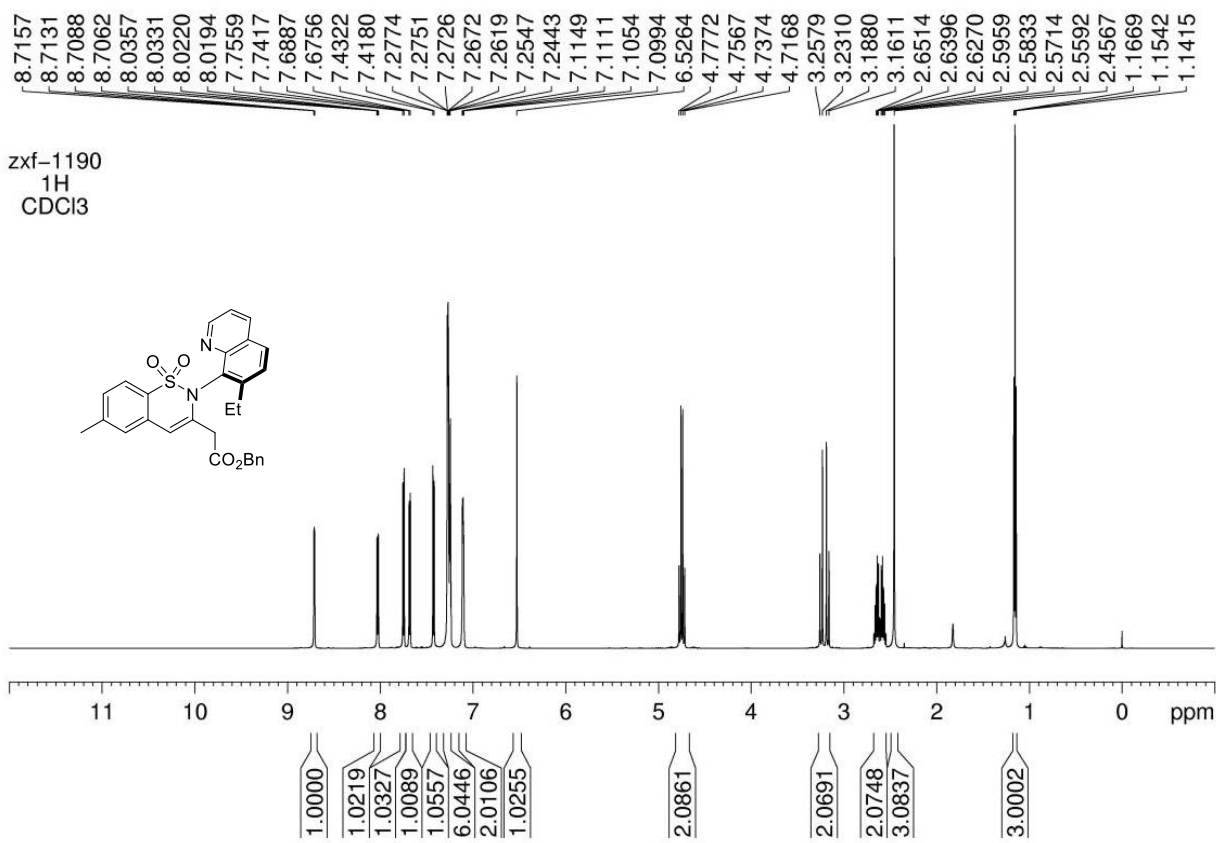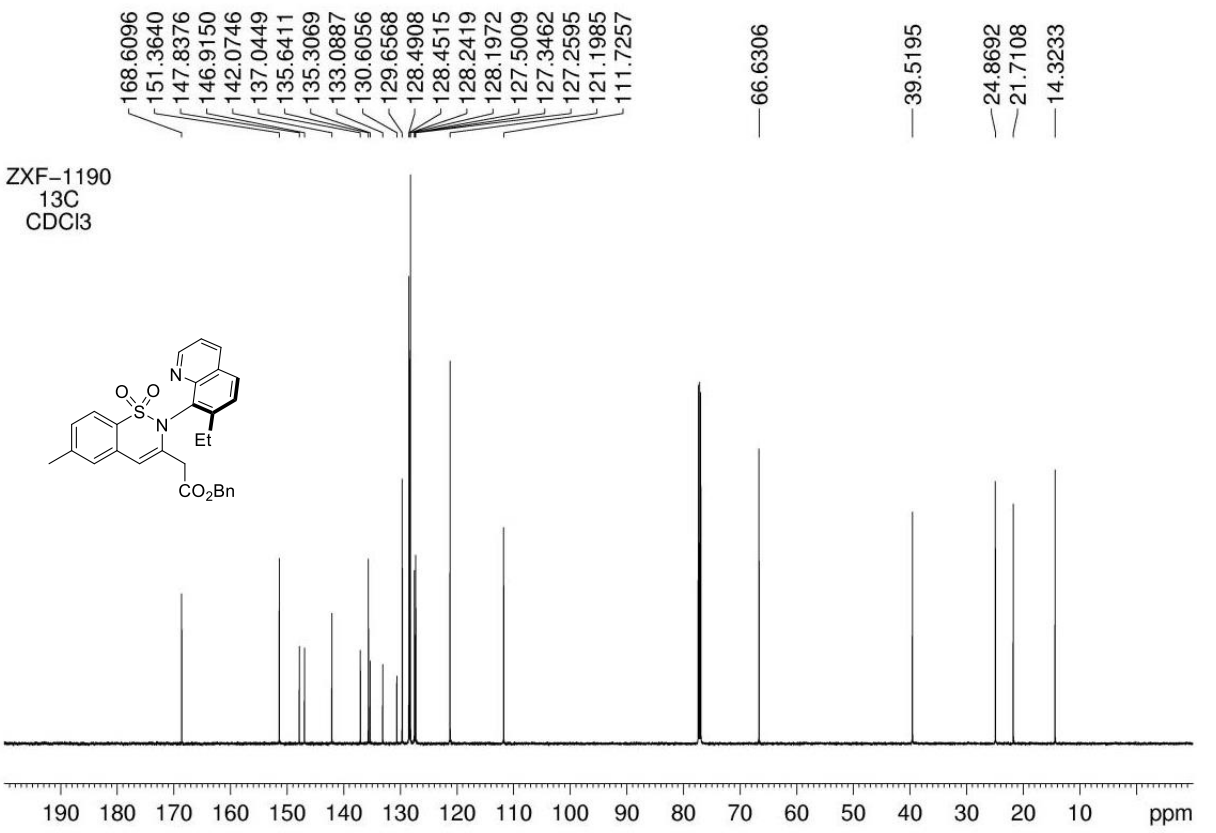

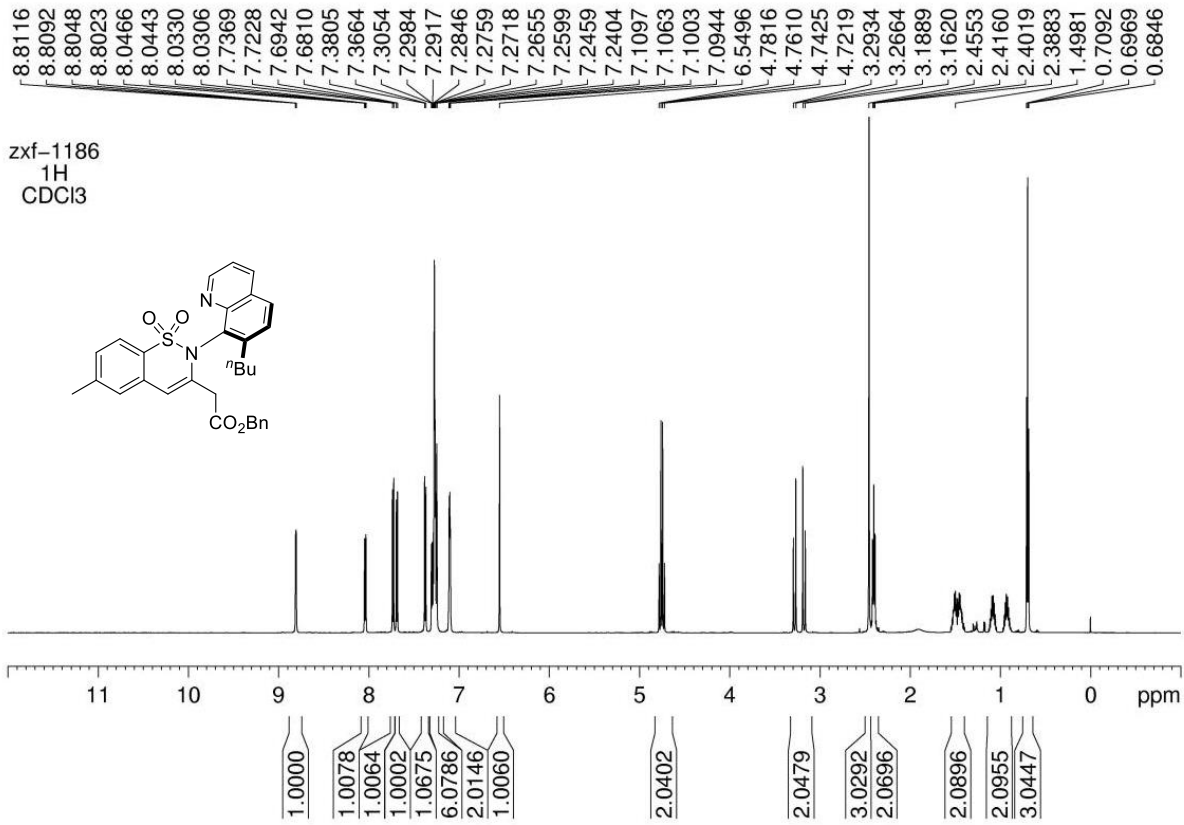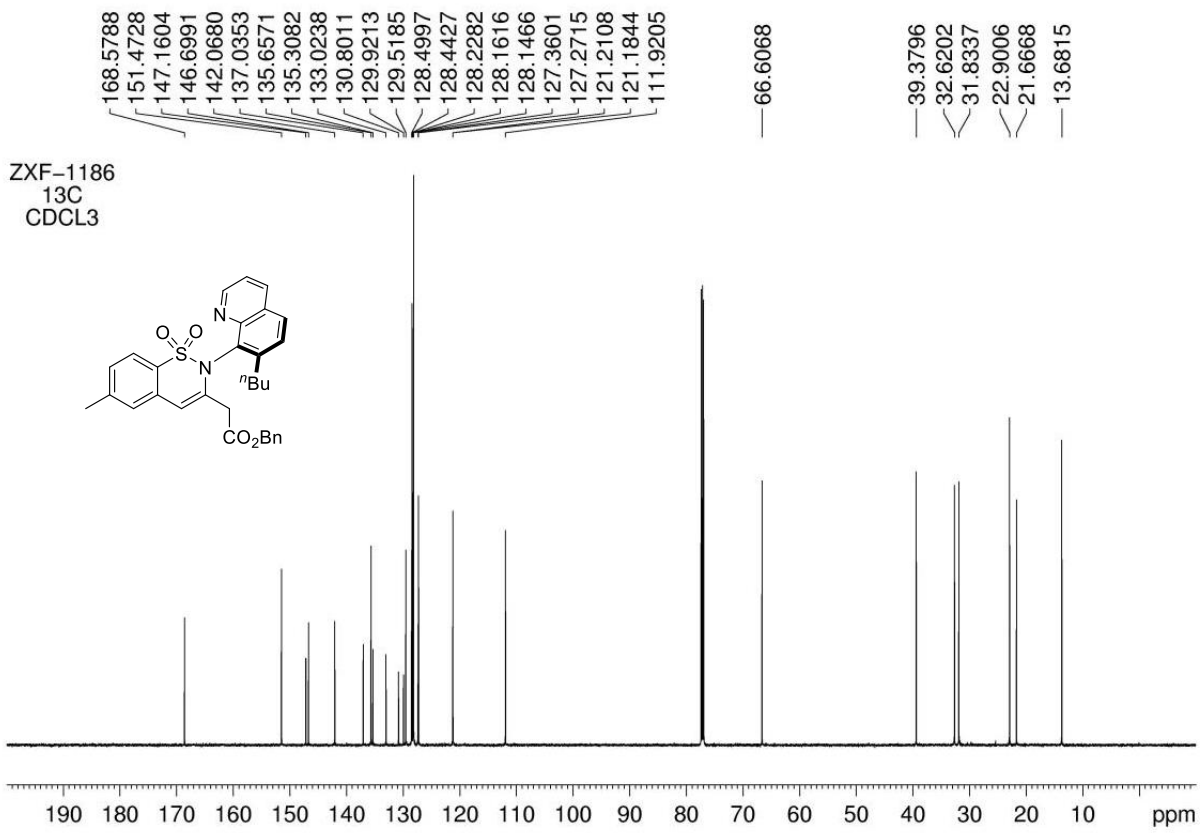

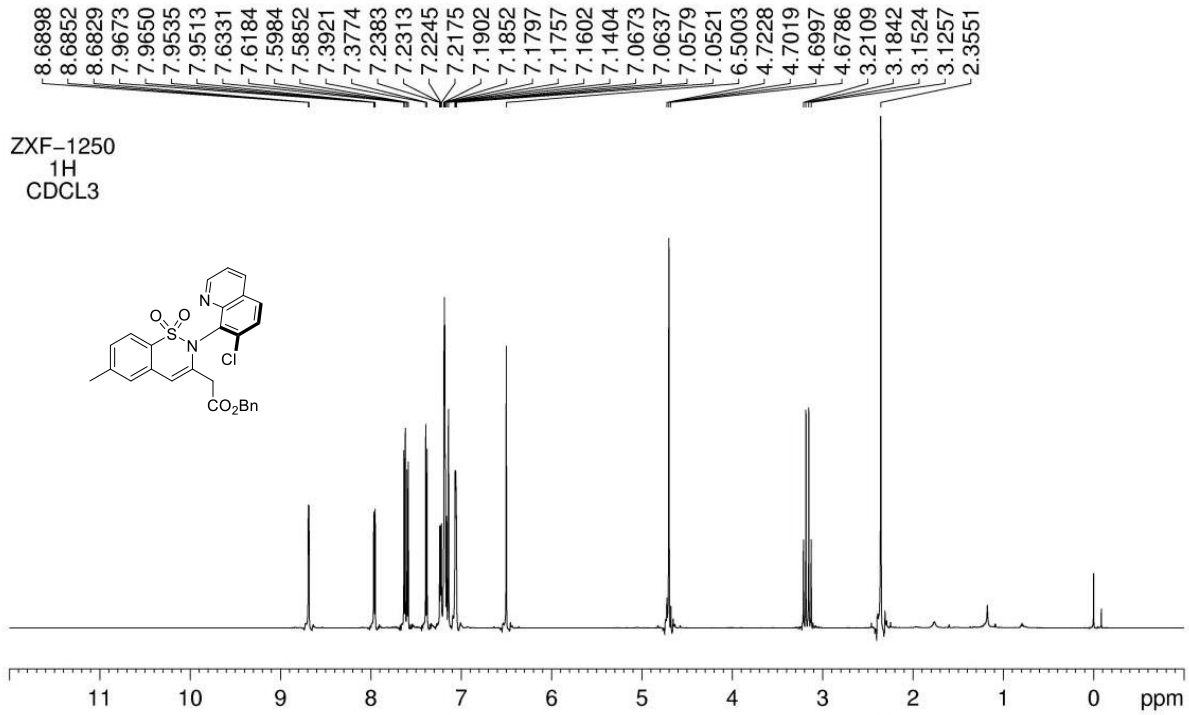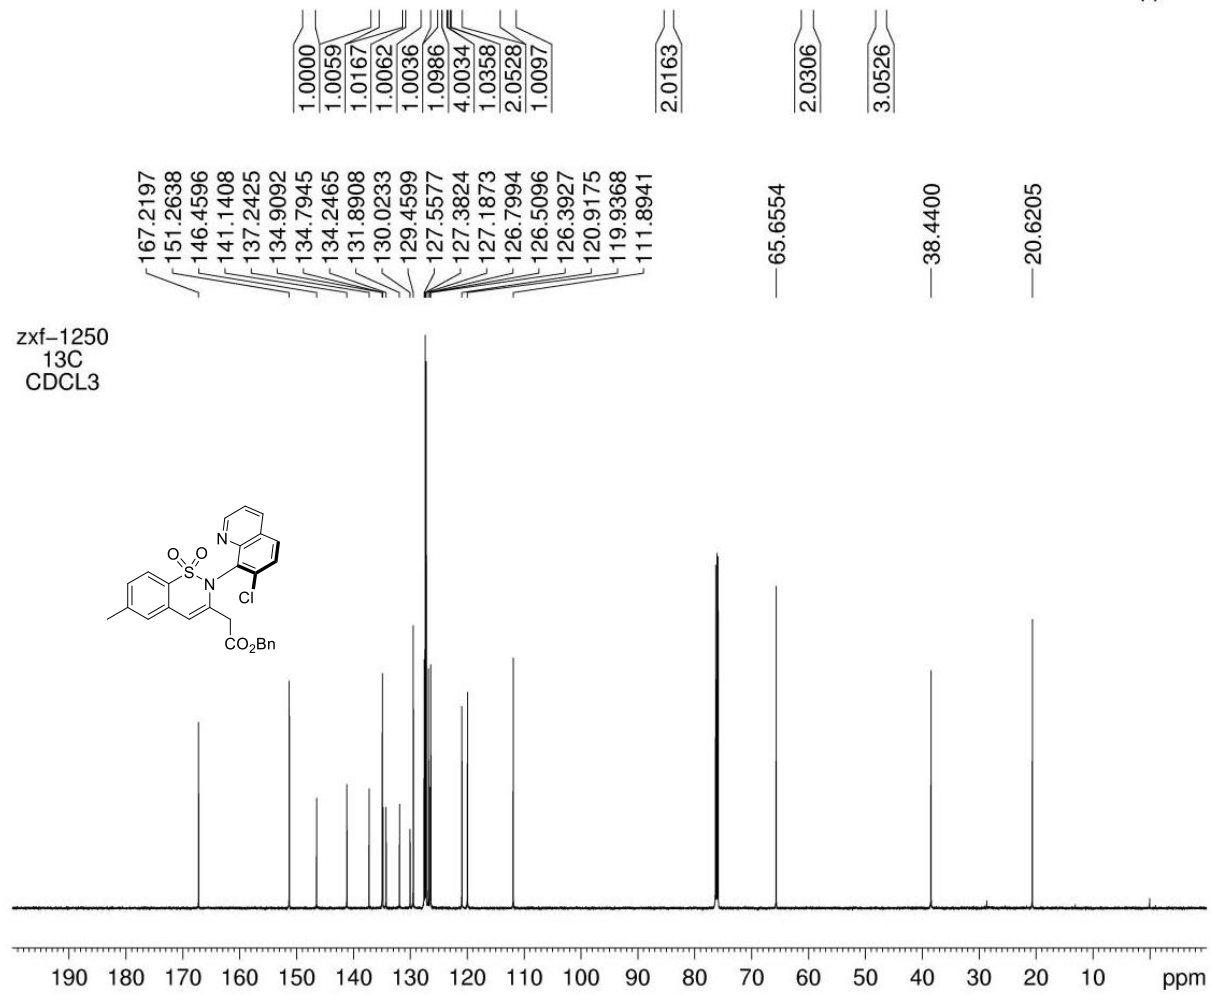



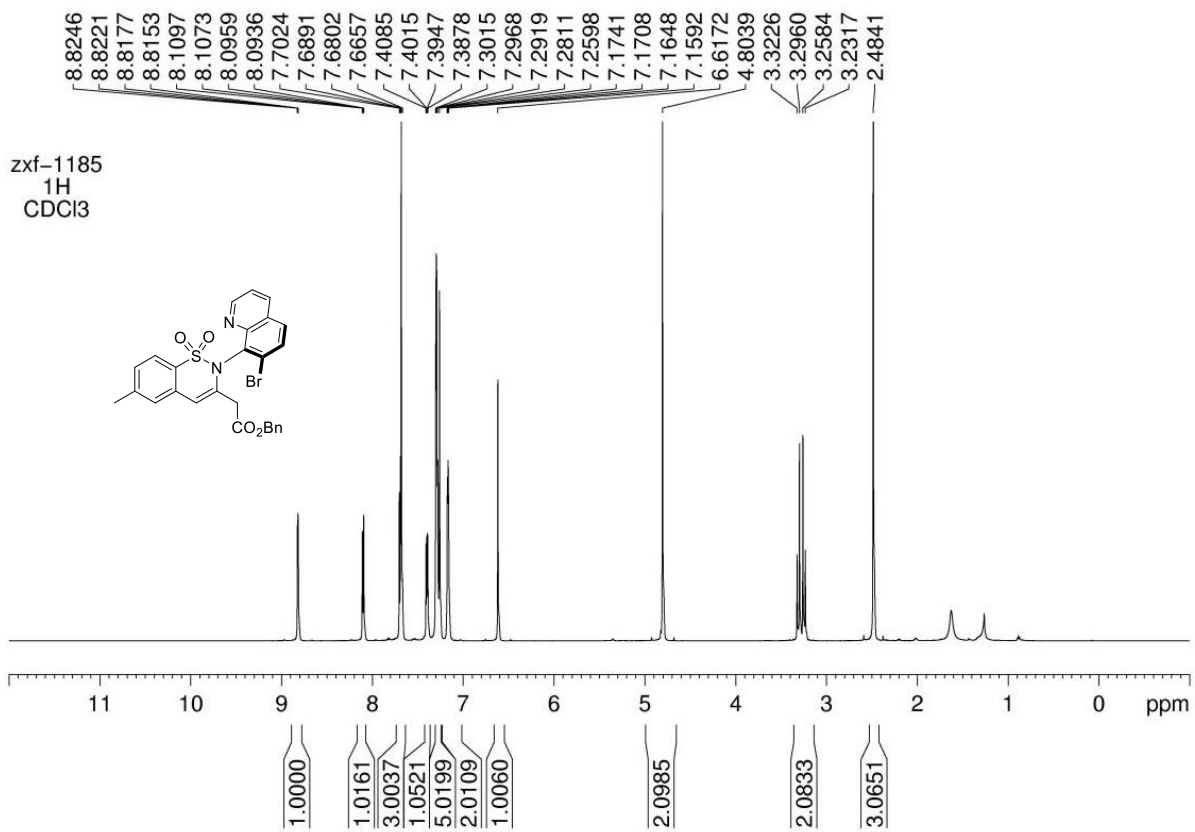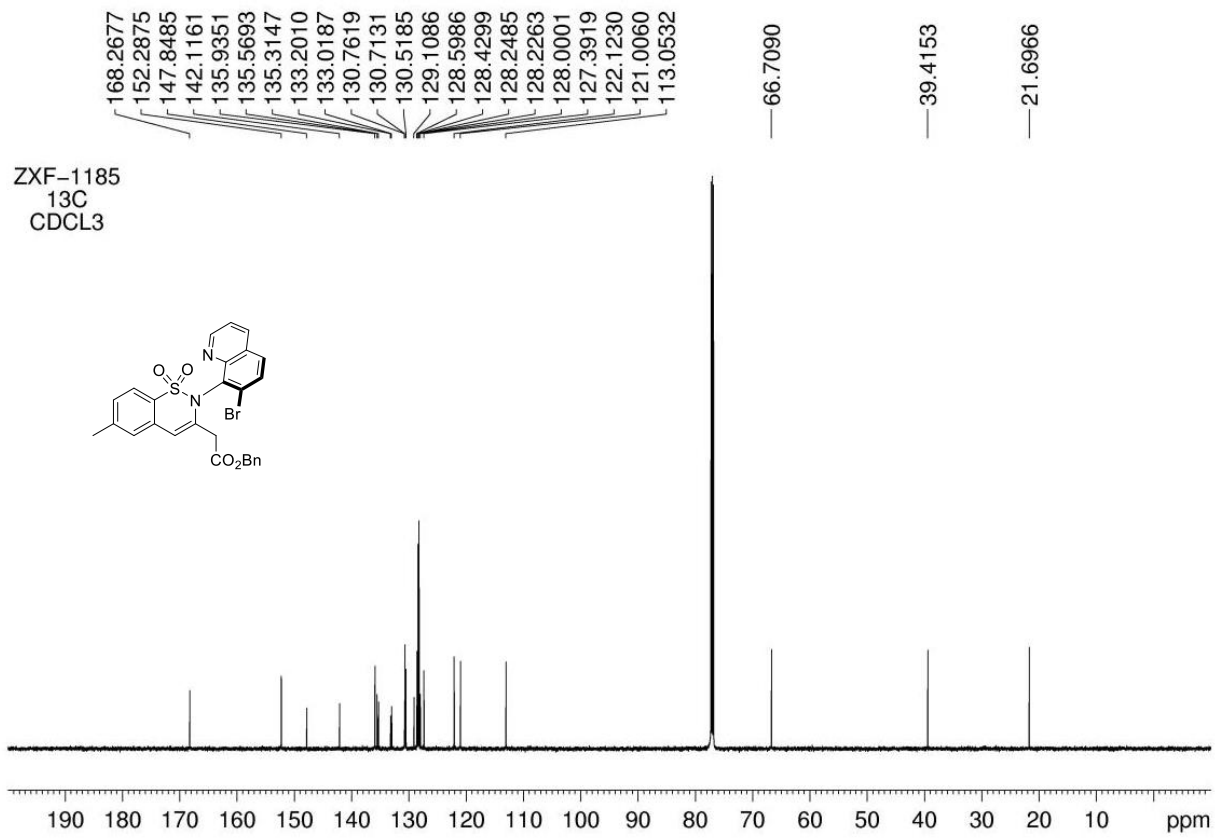

ZXF-1195  
<sup>1</sup>H  
CDCl<sub>3</sub>

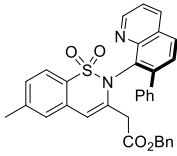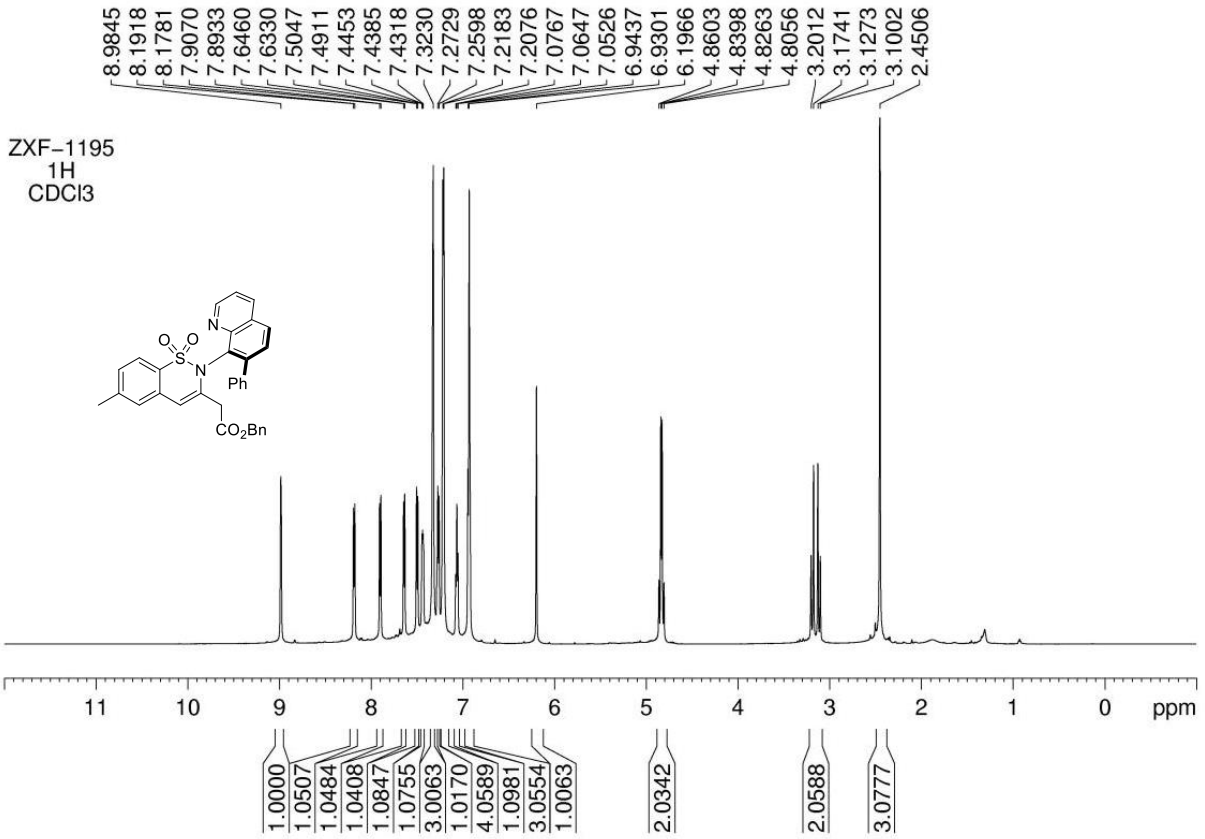

ZXF-1195  
<sup>13</sup>C  
CDCl<sub>3</sub>

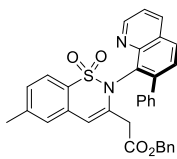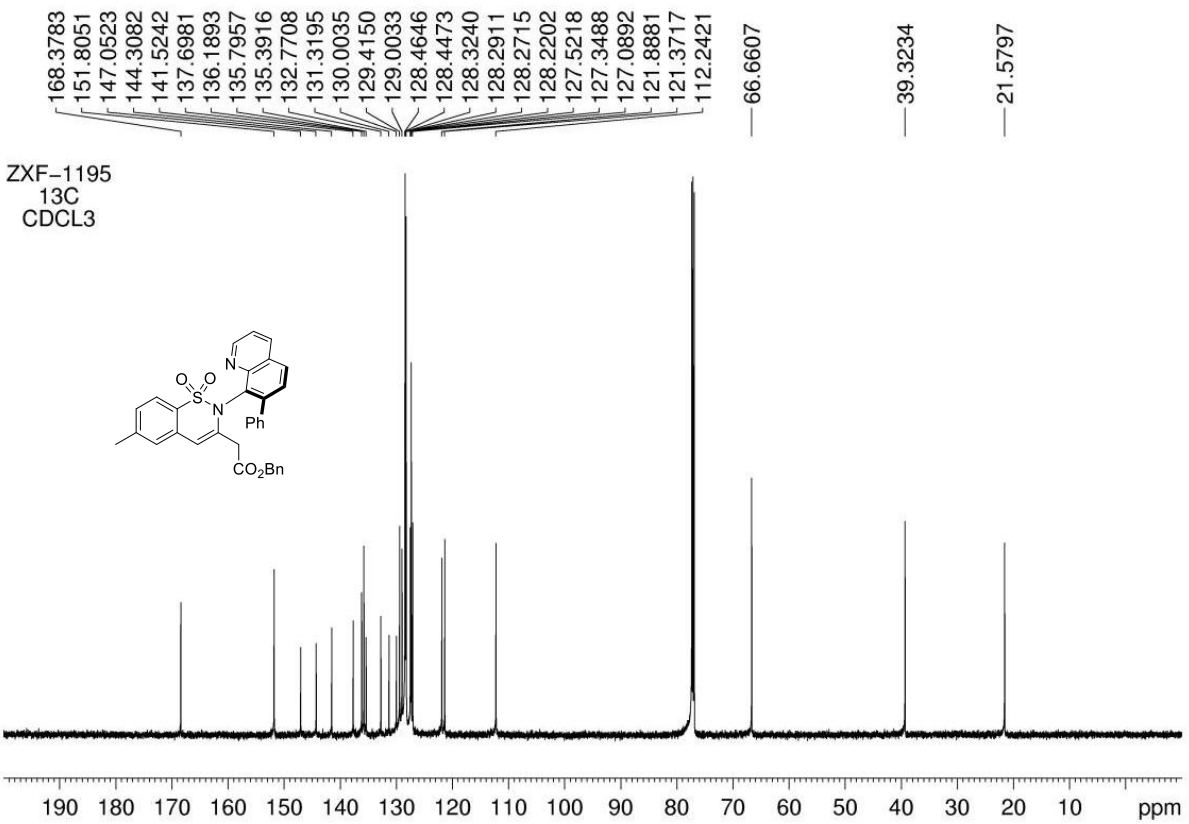



8.8730  
8.8709  
8.8664  
8.8643  
8.1046  
8.1028  
8.0910  
8.0892  
7.8893  
7.8748  
7.8293  
7.8148  
7.7714  
7.7582  
7.3675  
7.3568  
7.3486  
7.3335  
7.2832  
7.2738  
7.2504  
7.2402  
7.2380  
7.2291  
7.2270  
7.2168  
7.2043  
7.1928  
7.1777  
7.1505  
7.0893  
7.0775  
7.0546  
7.0426  
7.0267  
6.9996  
6.6397  
4.7847  
4.7641  
4.7249  
3.3478  
3.3208  
3.2547  
3.2278  
2.5742

zxf-1191  
1H  
CDCl3

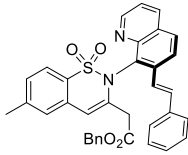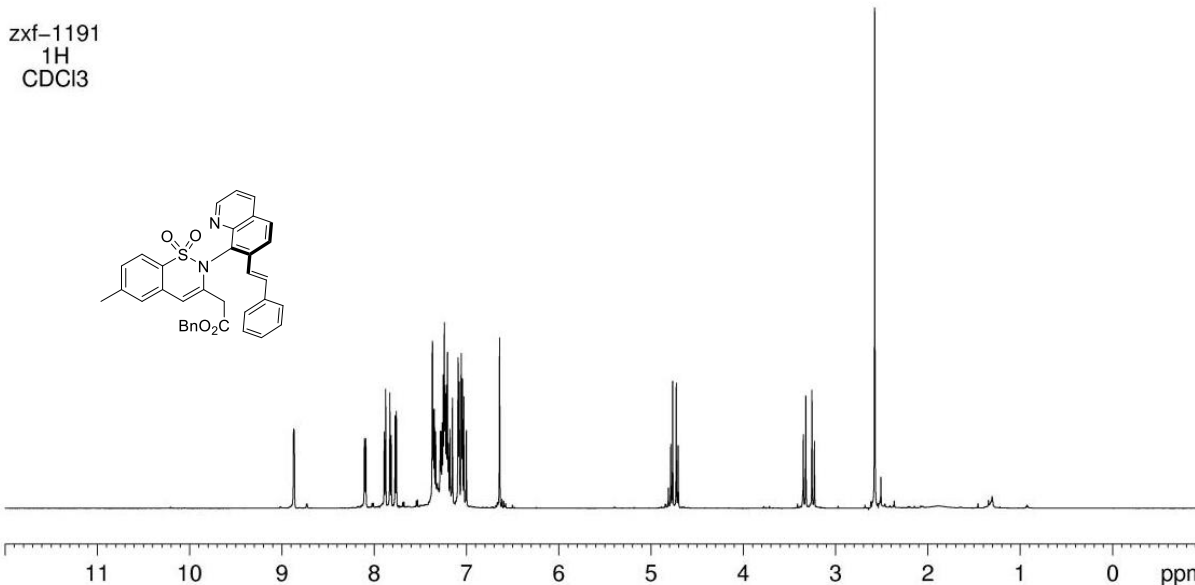

1.0000  
1.0336  
1.0410  
1.0274  
1.0075  
3.0860  
1.0526  
5.0619  
1.0590  
2.0140  
2.0274  
1.0914  
1.0230  
2.0125  
2.0151  
3.0864

168.3562  
151.9186  
147.4034  
142.2634  
140.0688  
137.5025  
136.5846  
135.6639  
135.2777  
133.4090  
133.0308  
130.5871  
129.7487  
129.6497  
128.7873  
128.5038  
128.3575  
128.3293  
128.1294  
127.3885  
127.0415  
123.3420  
123.2748  
121.6892  
121.6191  
112.0673  
66.6408  
39.5507  
21.7772

ZXF-1191  
13C  
CDCl3

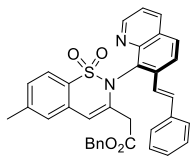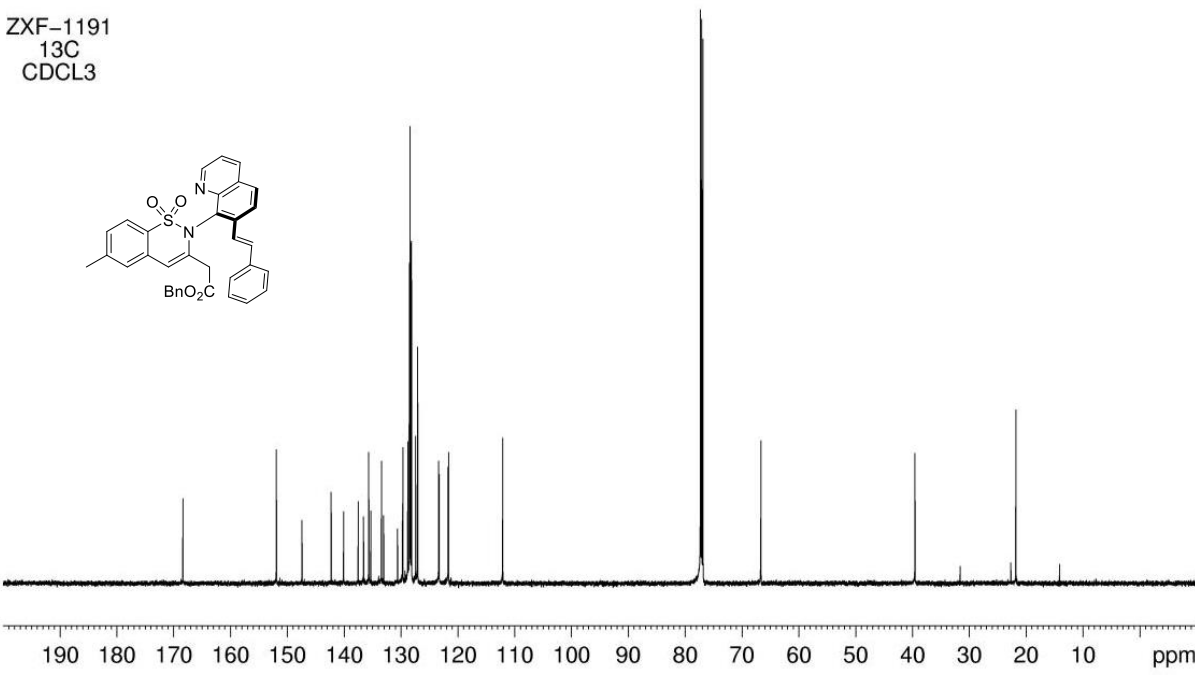

8.8275  
8.8249  
8.8207  
8.8179  
8.1050  
8.1024  
8.0912  
8.0886  
7.8291  
7.8149  
7.5829  
7.5696  
7.5486  
7.5345  
7.3563  
7.3493  
7.3422  
7.3412  
7.3390  
7.3355  
7.2968  
7.2929  
7.2874  
7.2859  
7.2444  
7.2312  
7.1169  
7.1137  
7.1072  
7.0991  
7.0967  
7.0939  
7.0276  
7.0226  
7.0194  
7.0144  
6.3548  
4.7223  
4.7018  
4.6892  
3.2875  
3.2605  
3.2187  
3.1917  
2.4571

ZXF-1255  
1H  
CDCL3

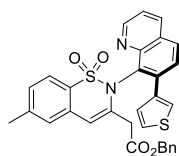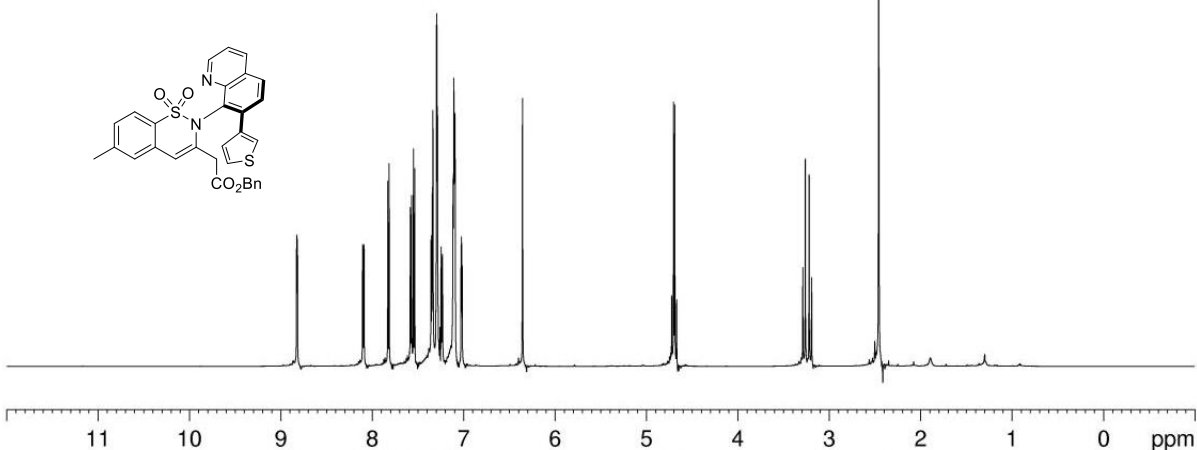

1.0000  
1.0220  
1.0099  
2.0187  
2.0675  
3.0042  
1.0112  
4.0326  
1.0068  
1.0027  
2.0036  
2.0595  
3.0965

168.5512  
151.6555  
147.1433  
141.7252  
140.0811  
137.6695  
136.9188  
135.7759  
135.3061  
132.8871  
131.1379  
130.1810  
129.5576  
128.7514  
128.4524  
128.4134  
128.2475  
128.2225  
127.1336  
124.9014  
124.8509  
121.7870  
121.1043  
112.2577  
66.5685  
39.4464  
21.6607

zxf-1255  
13C  
CDCL3

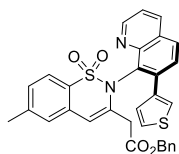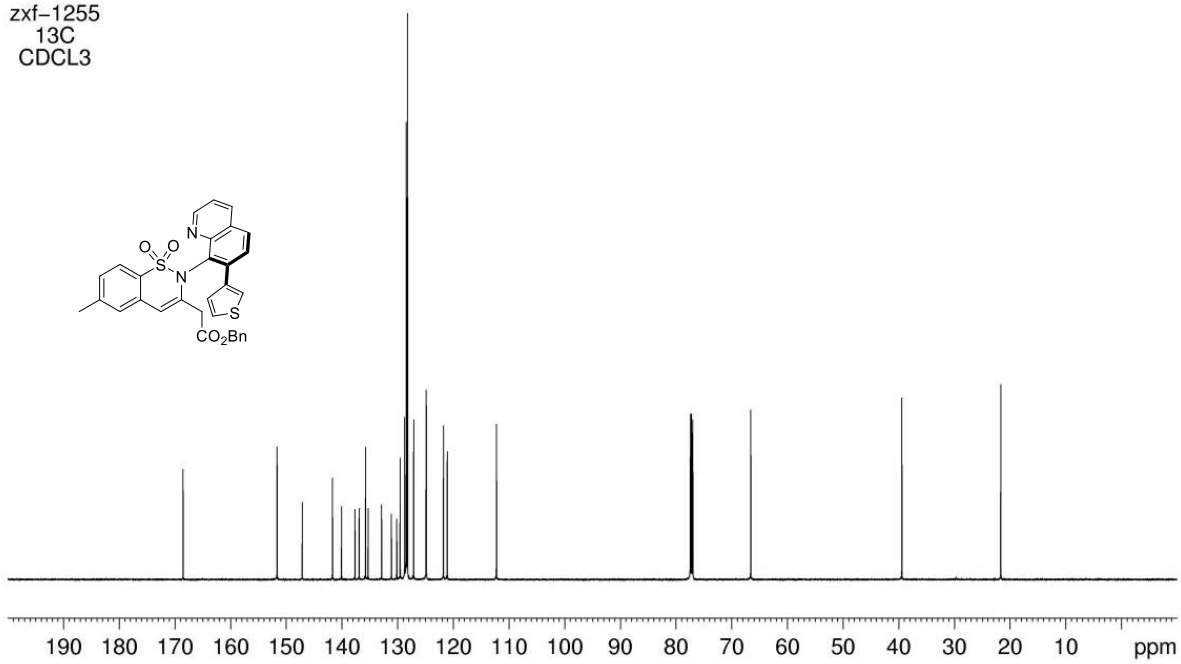

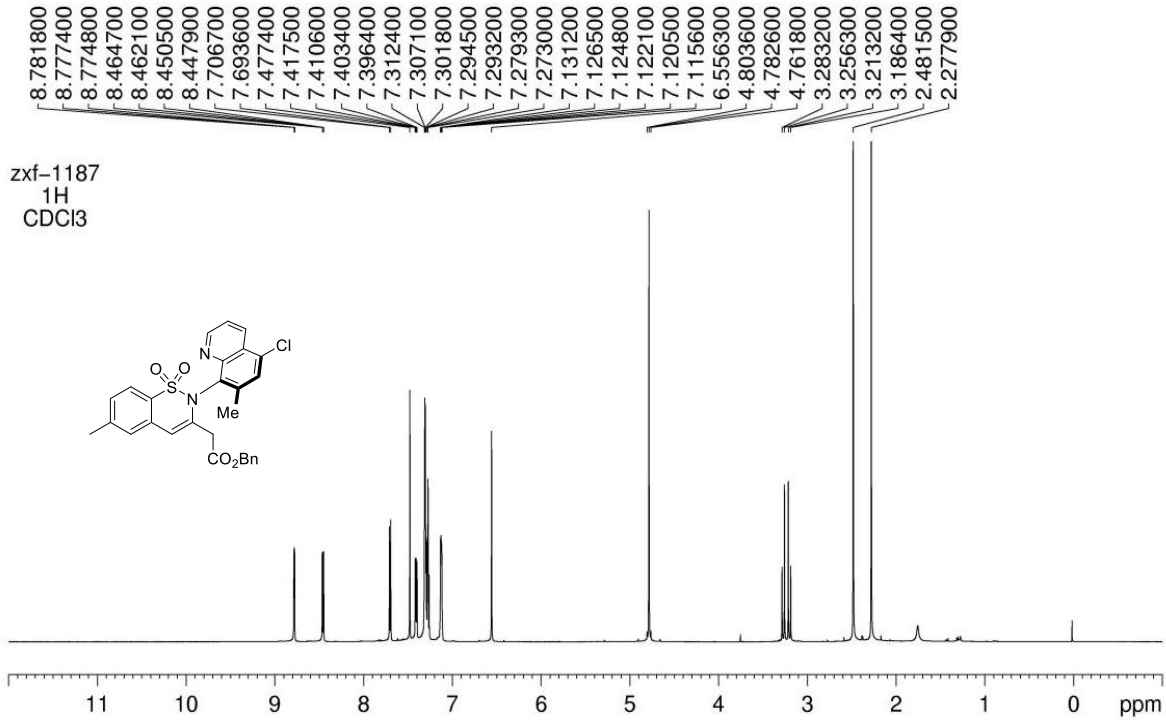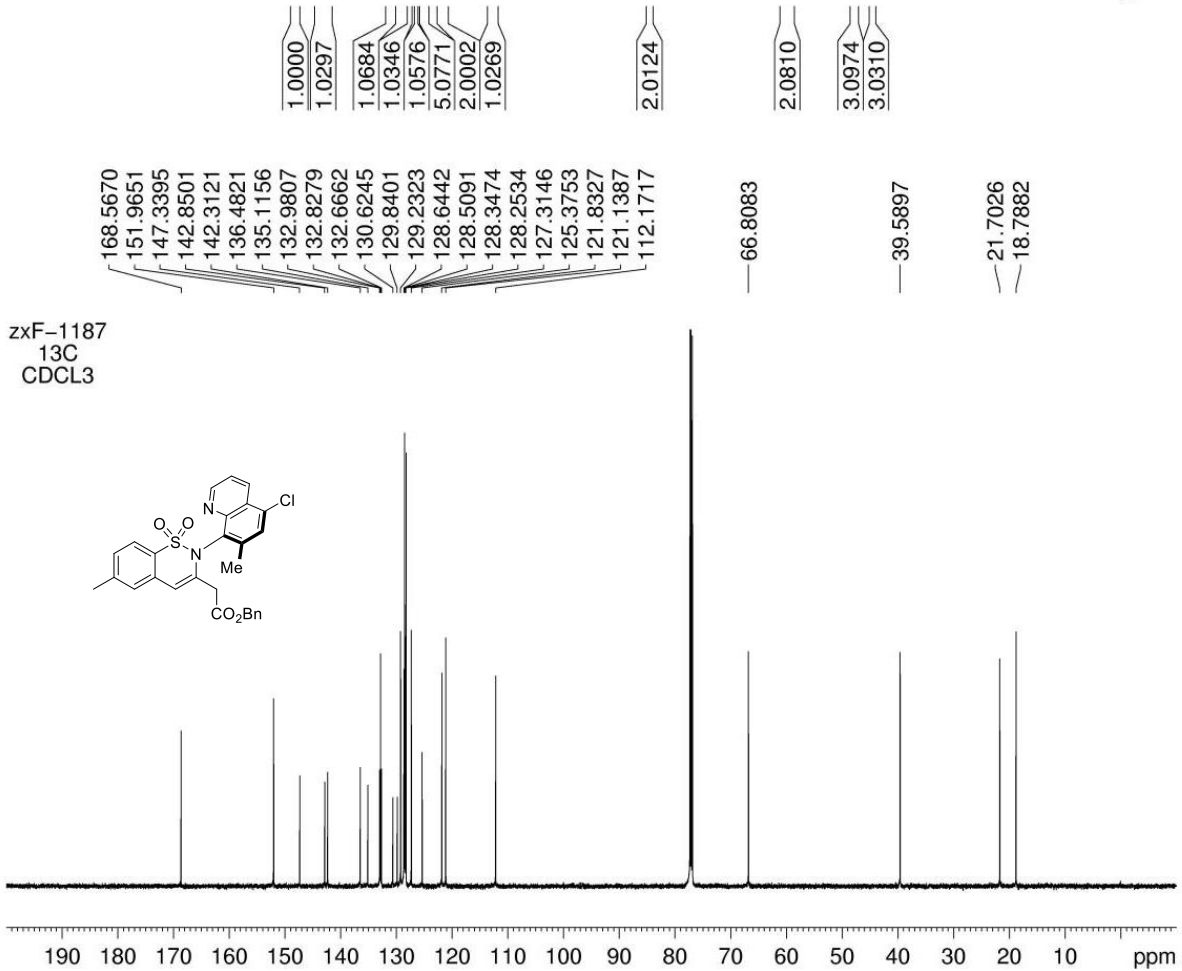

ZXF-1188  
<sup>1</sup>H  
 CDCl<sub>3</sub>

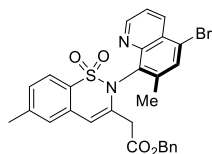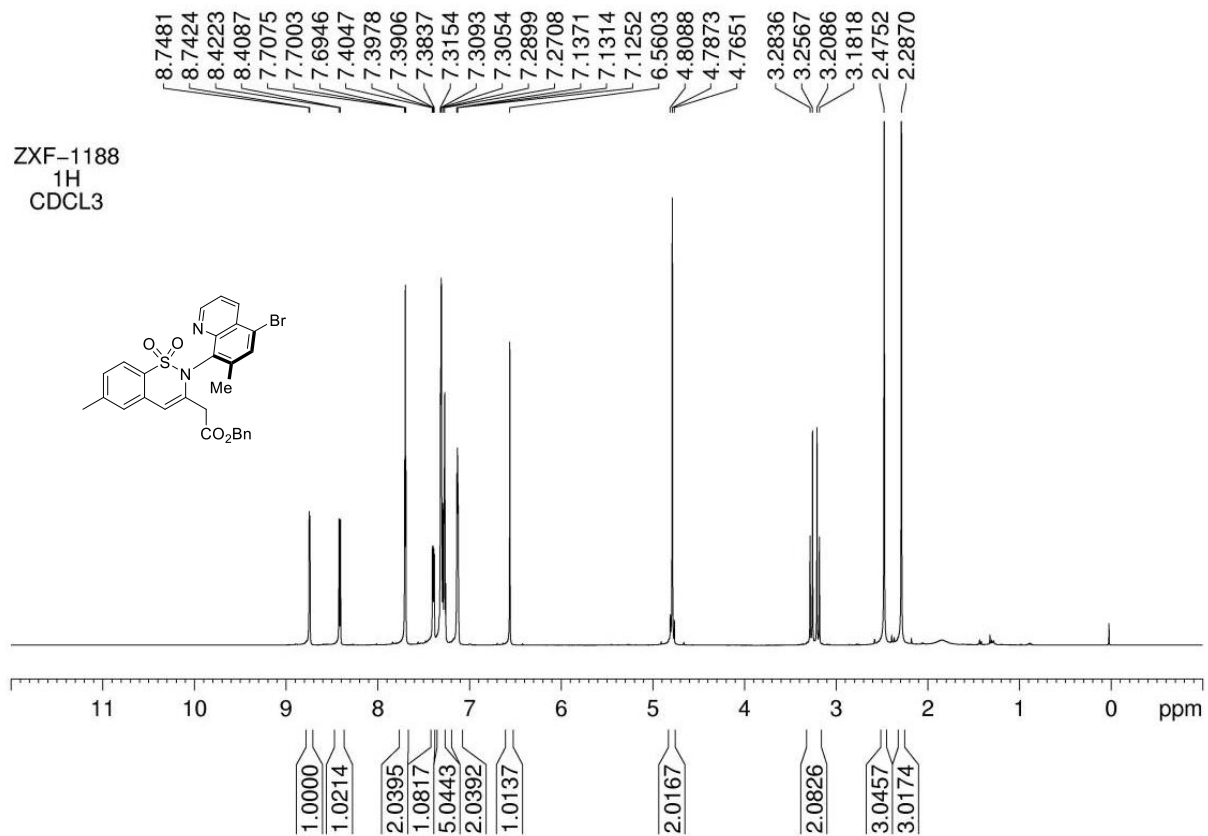

ZXF-1188  
<sup>13</sup>C  
 CDCl<sub>3</sub>

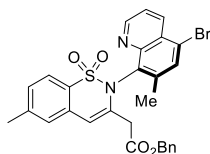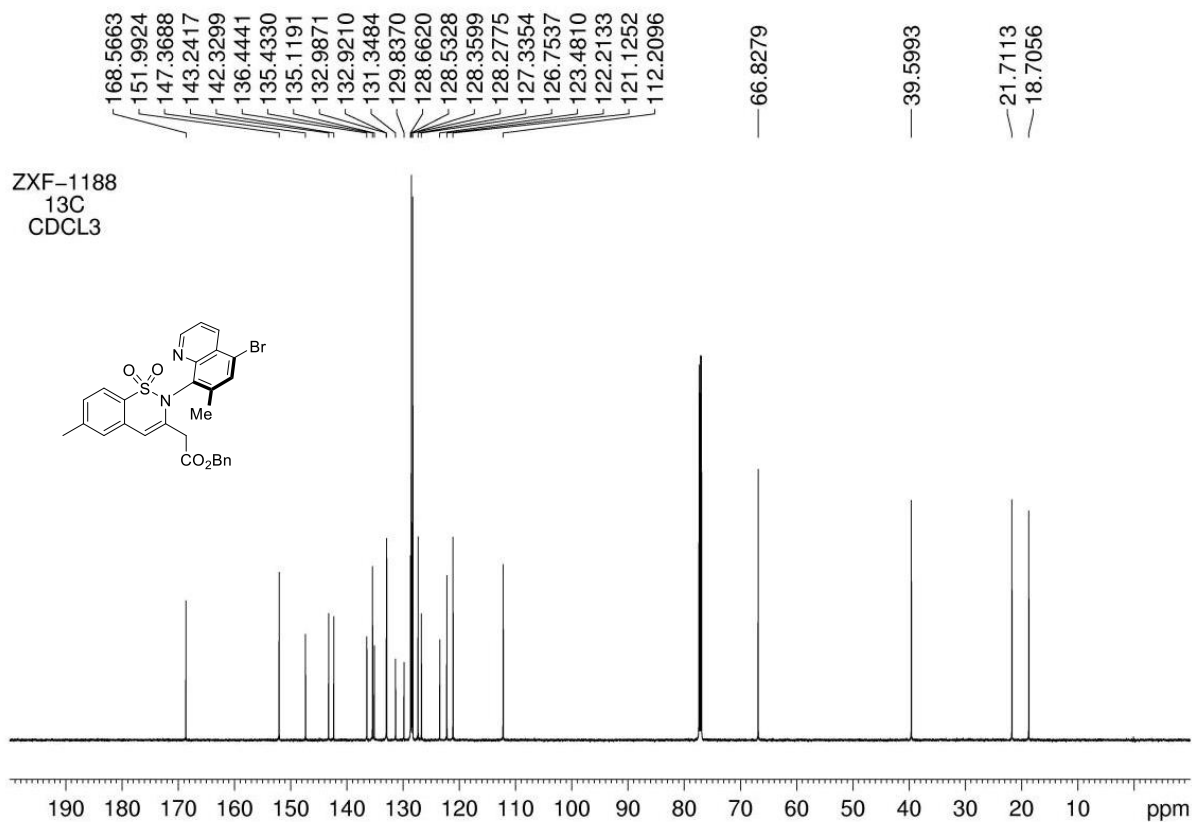

zxf-1252  
1H  
CDCl3

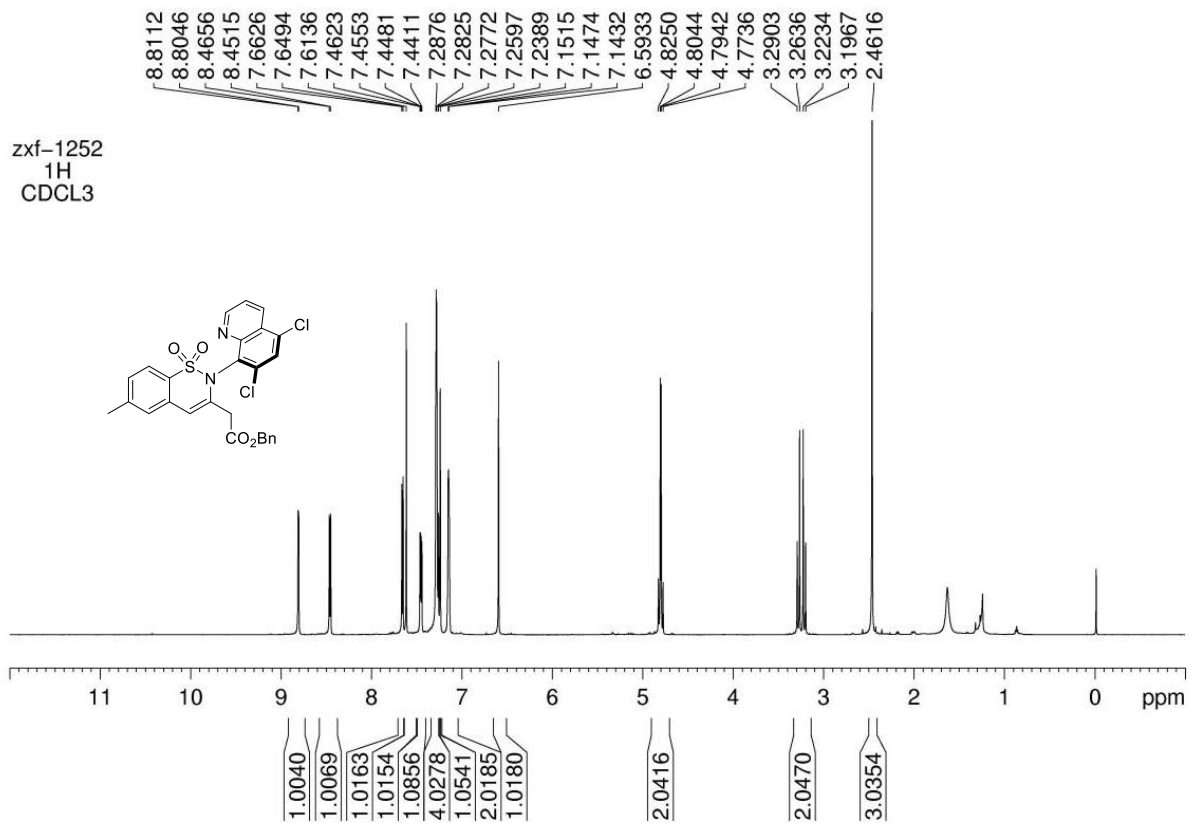

wjl-1252  
13C  
CDCl3

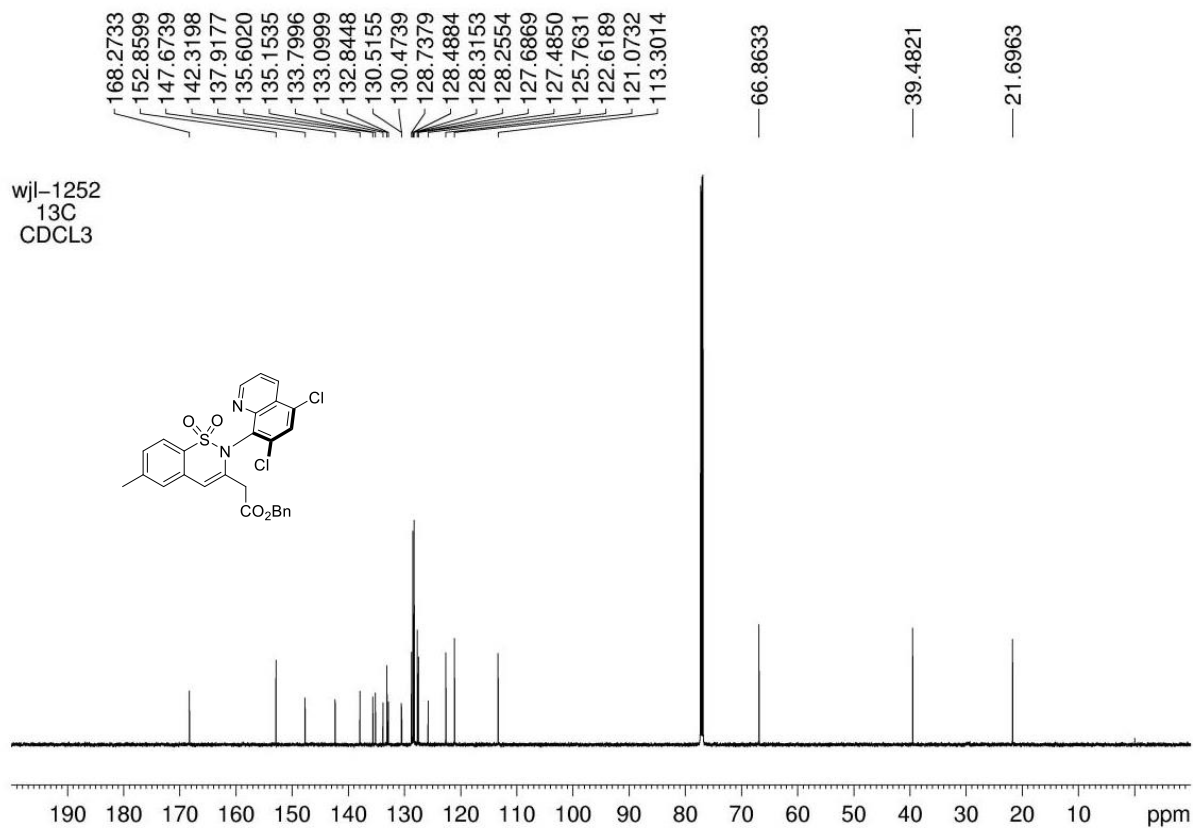



zxf-1251  
1H  
CDCl3

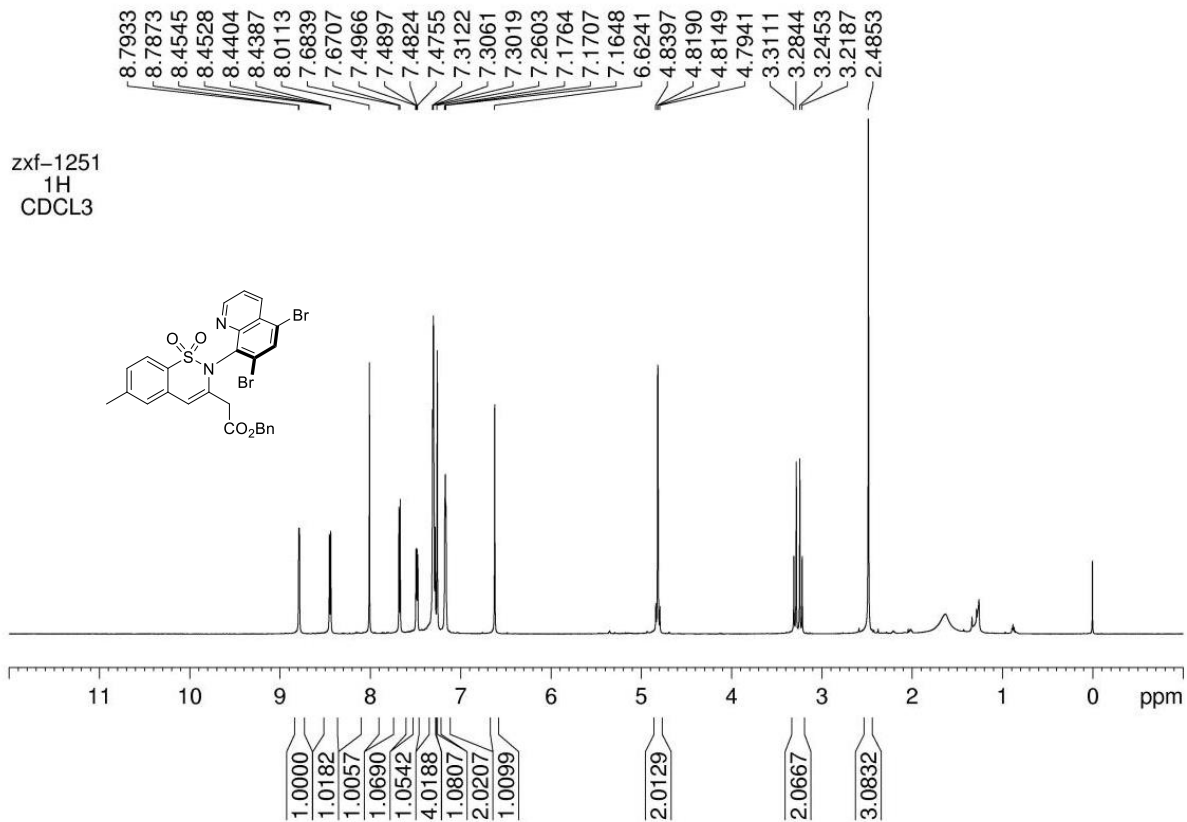

zxf-1251  
13C  
CDCl3

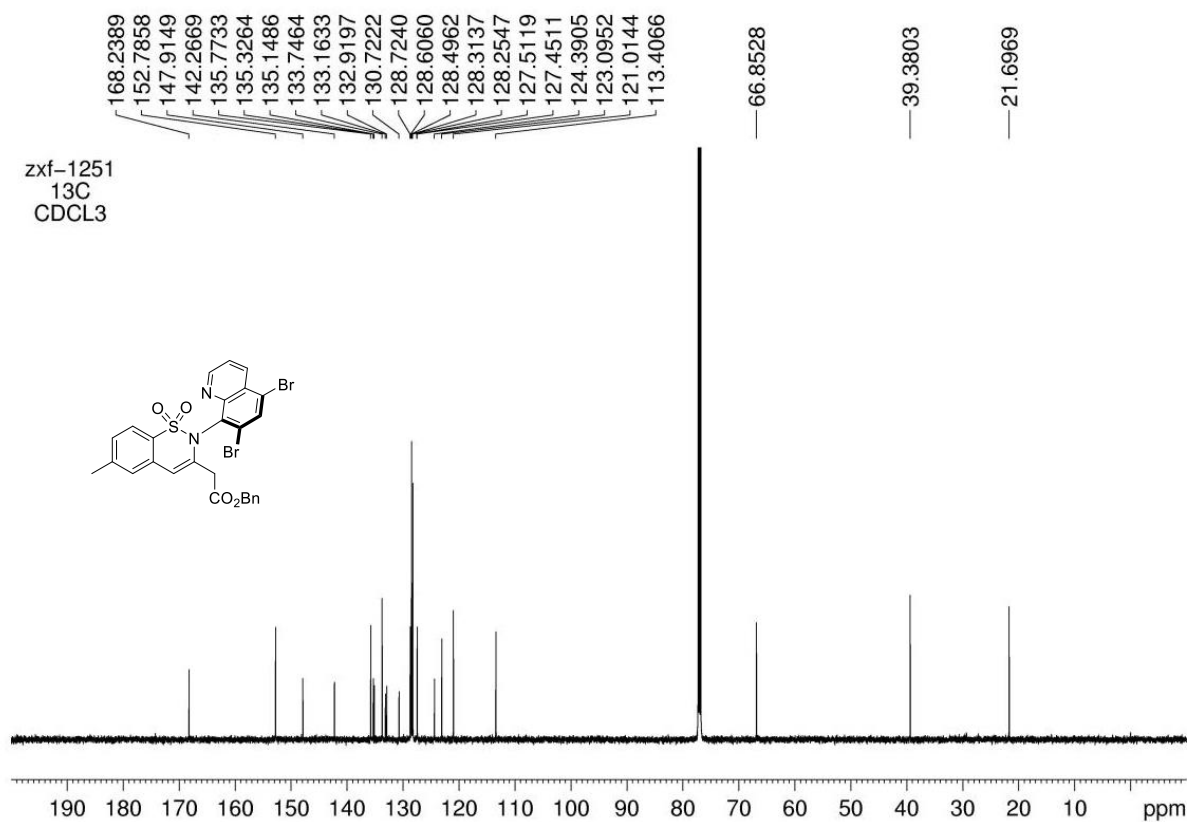

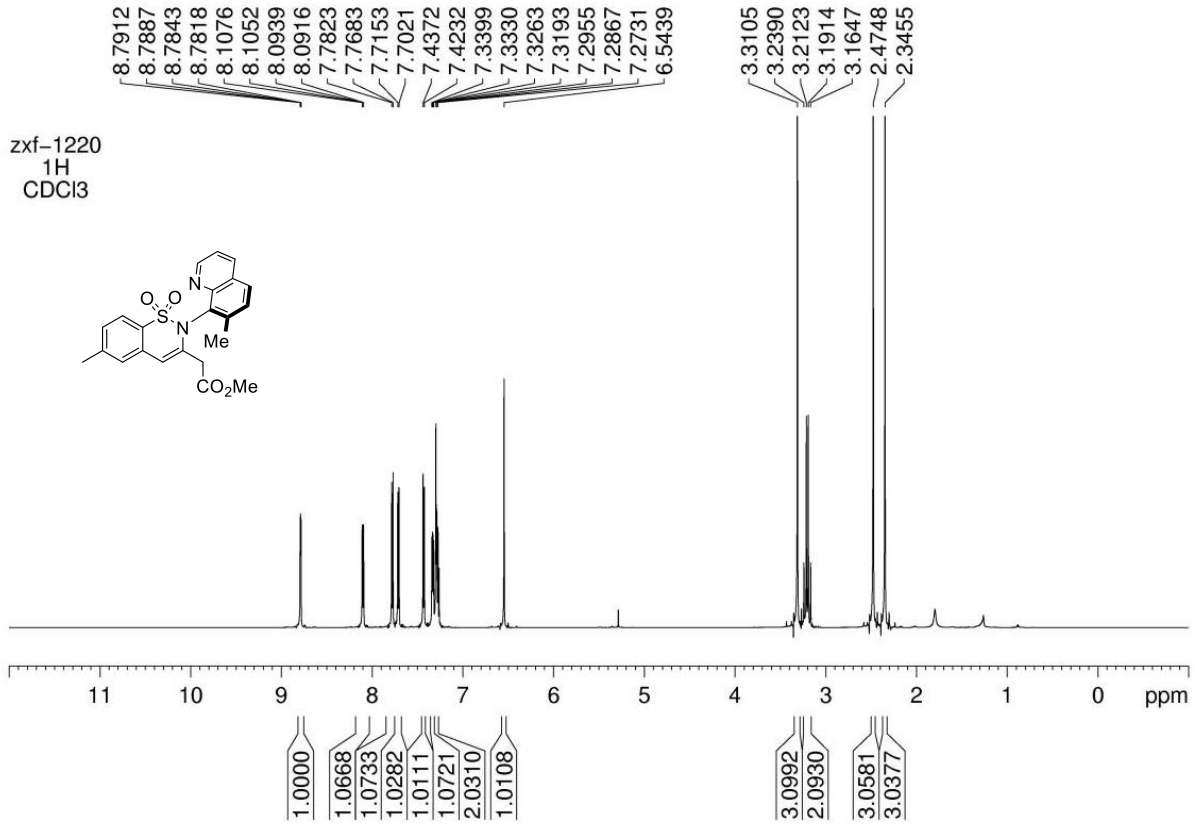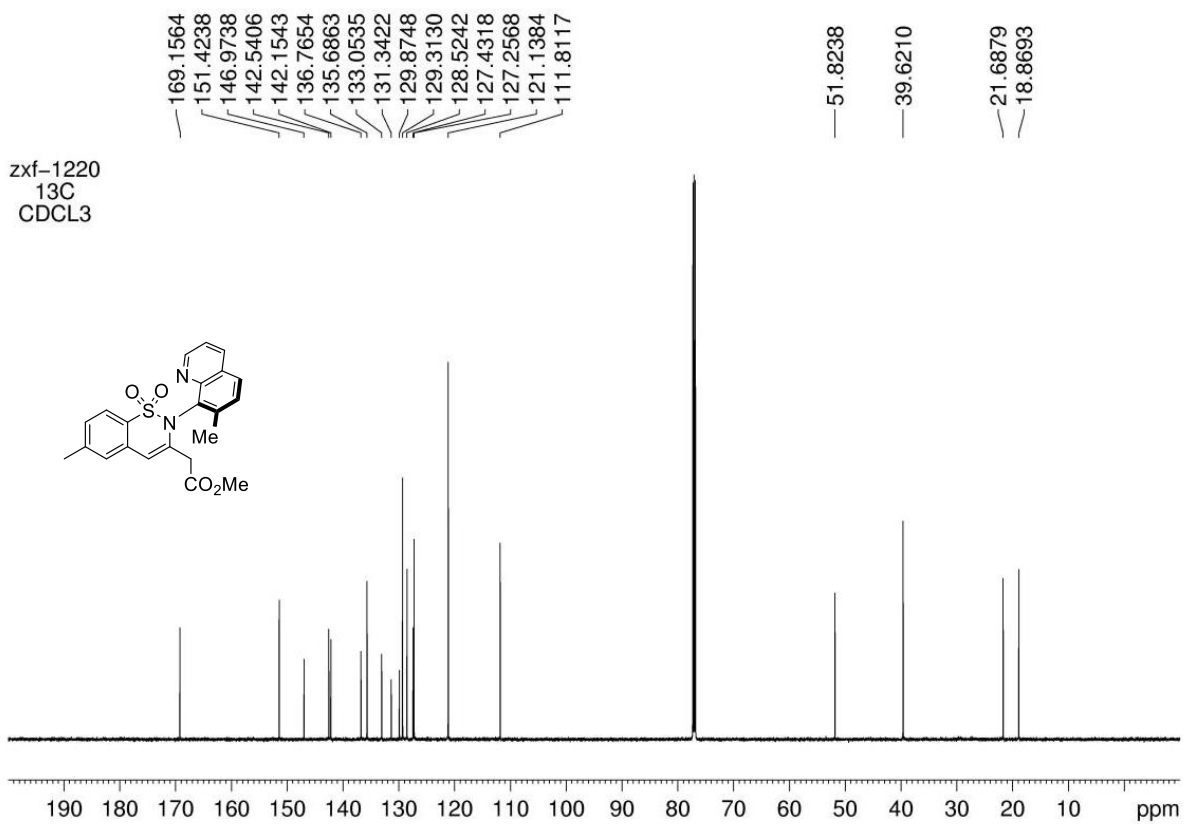

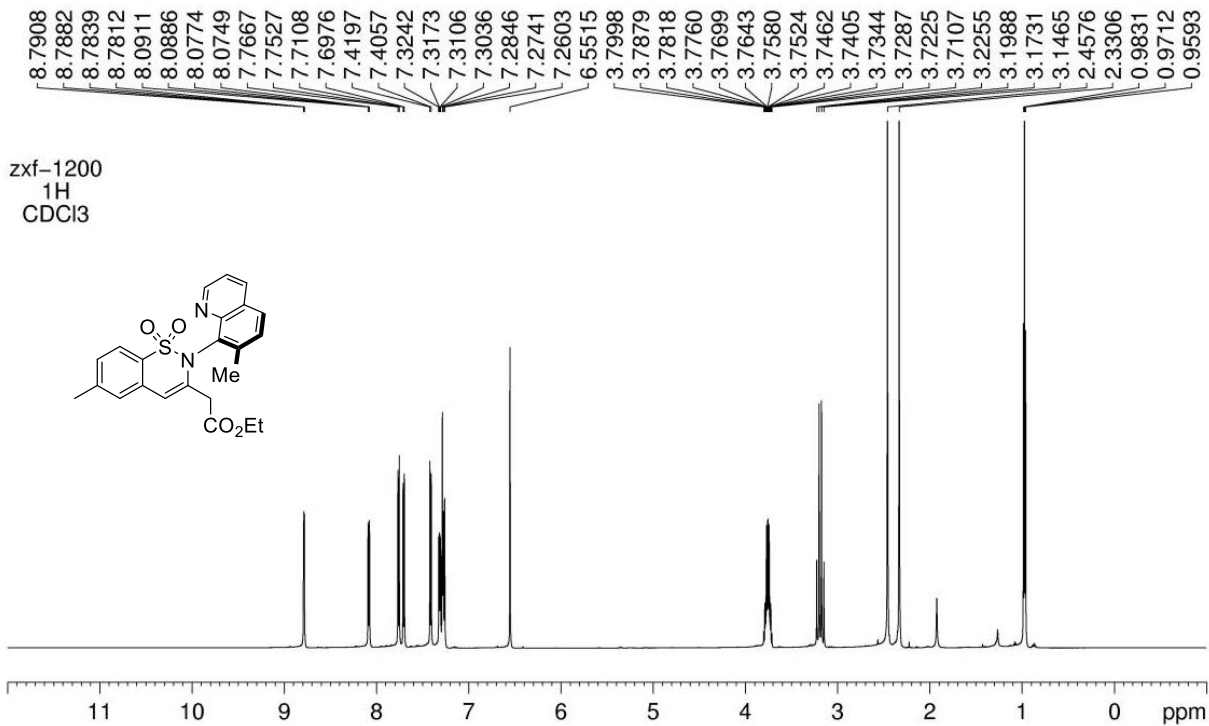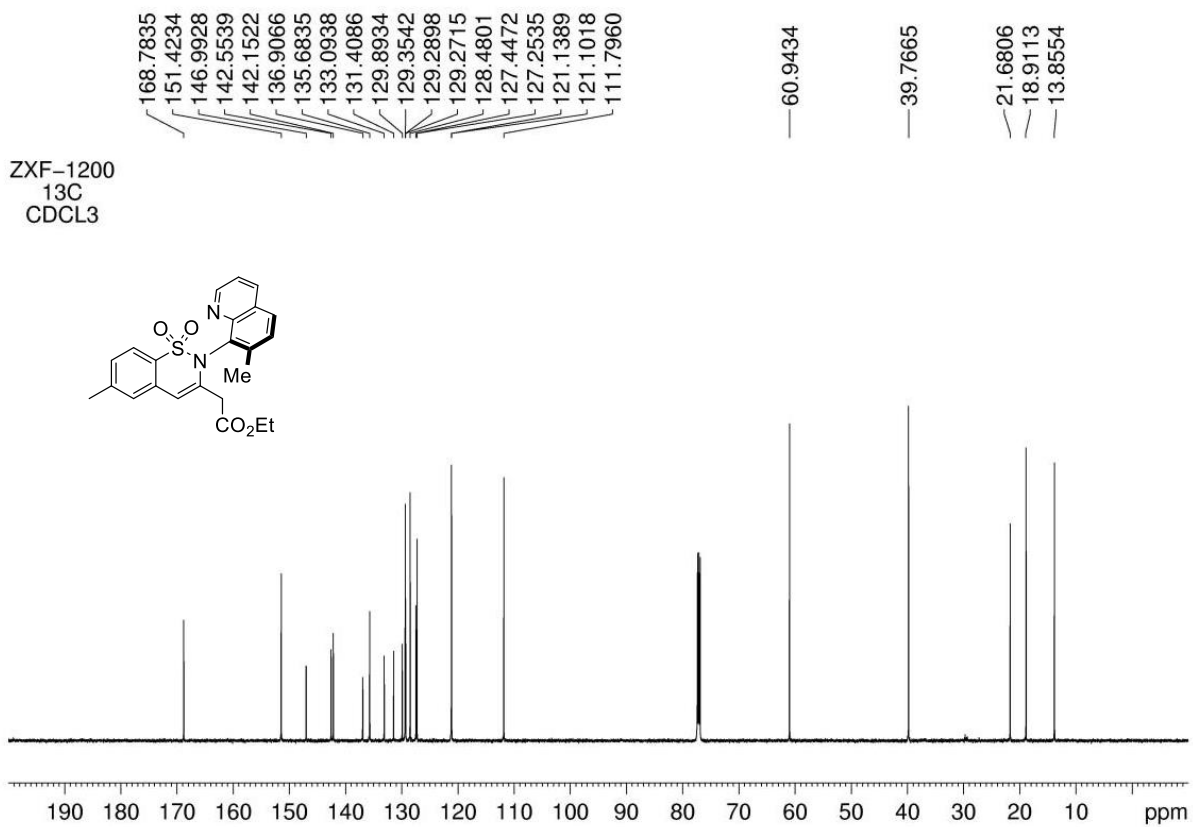

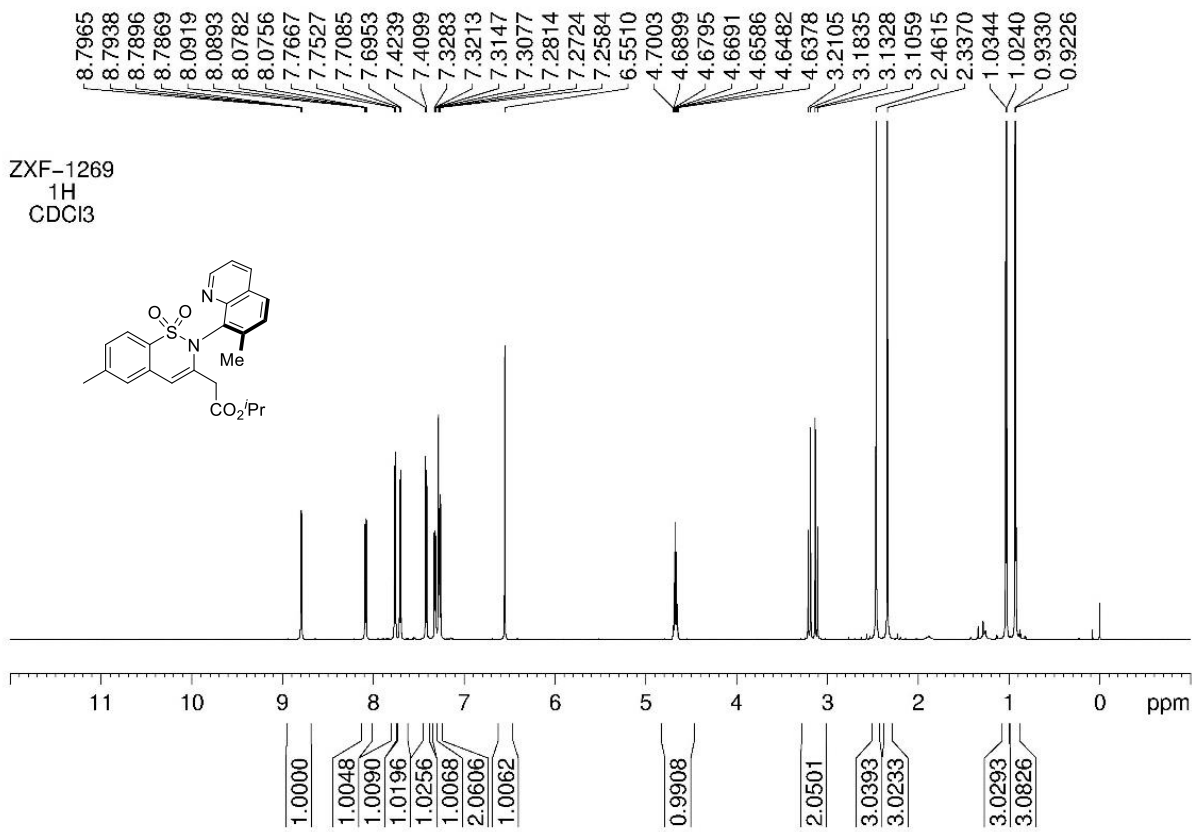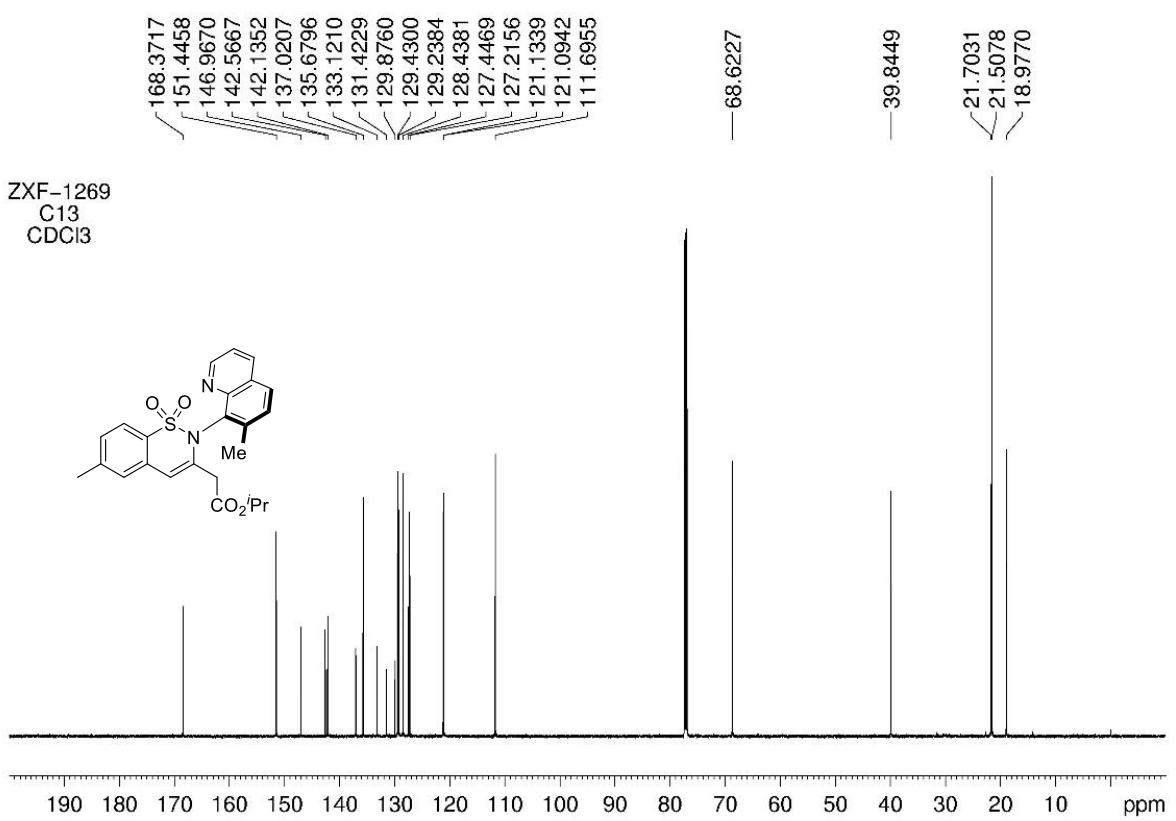

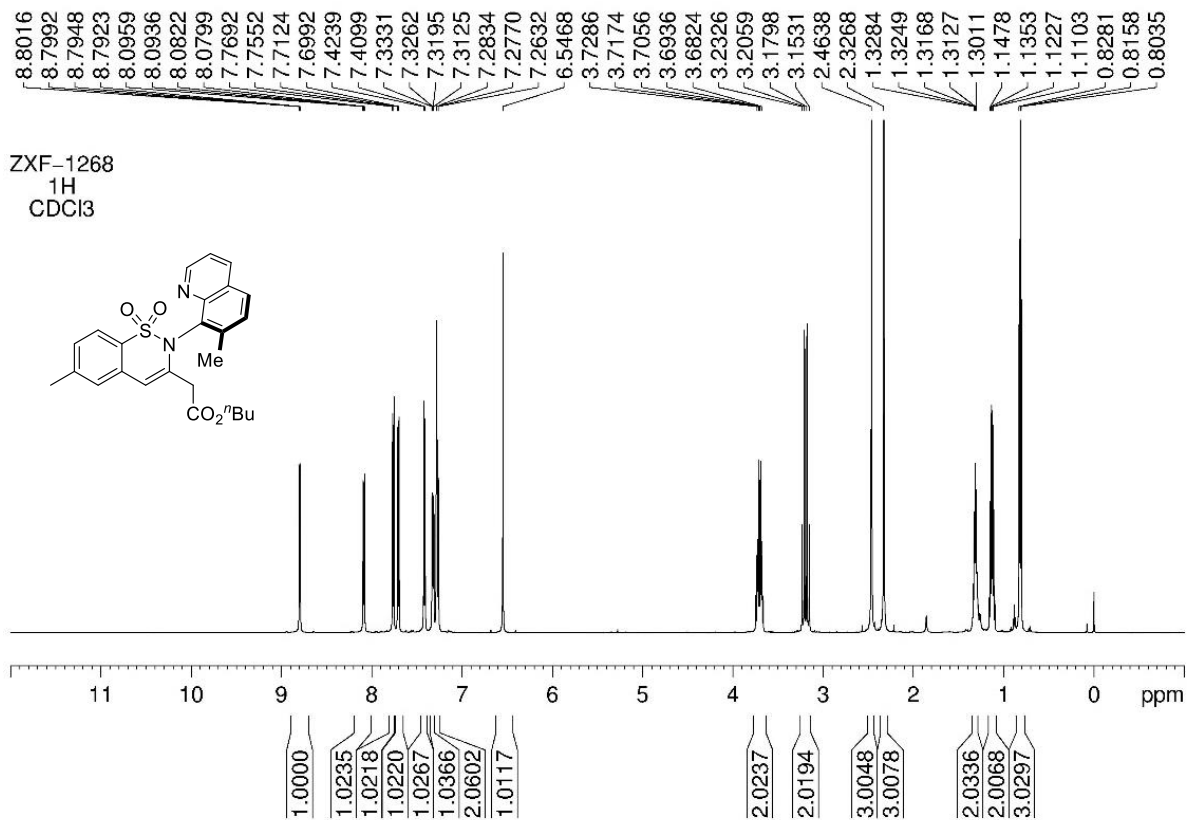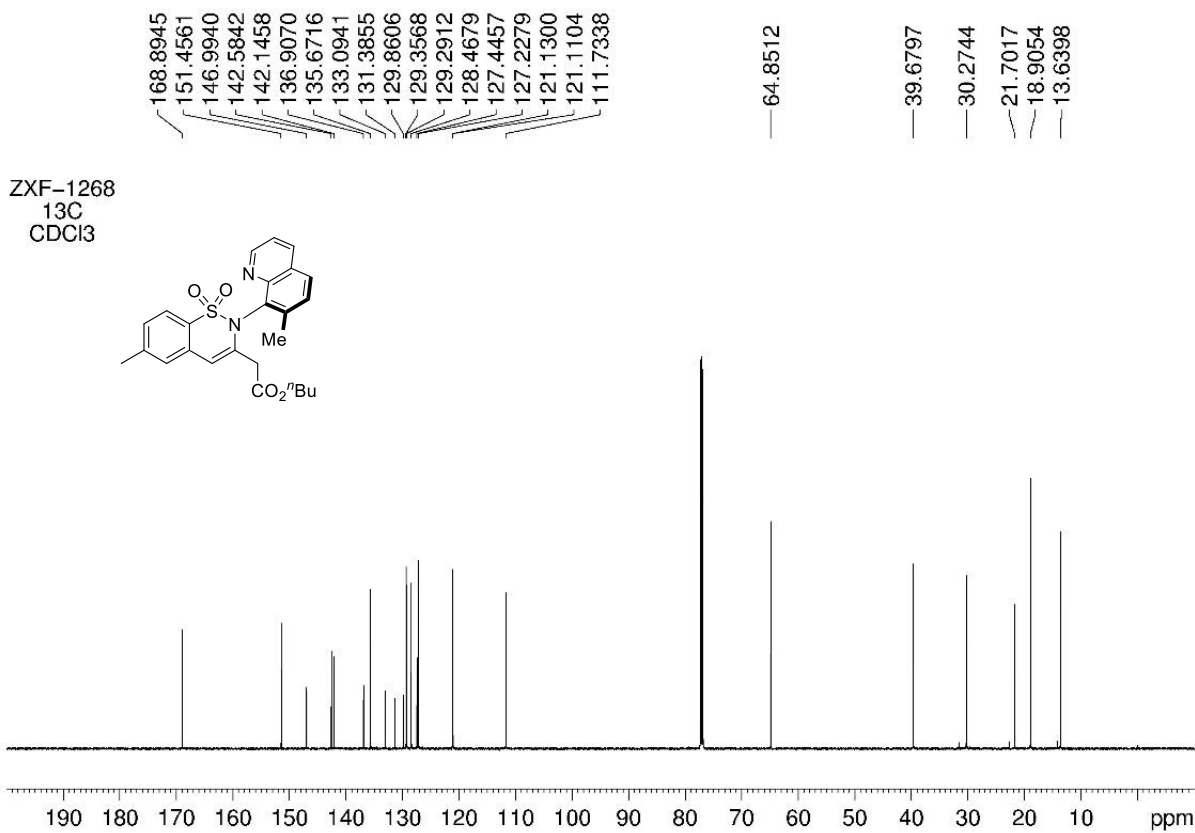

zxf-1216  
1H  
CDCL3

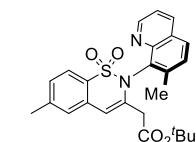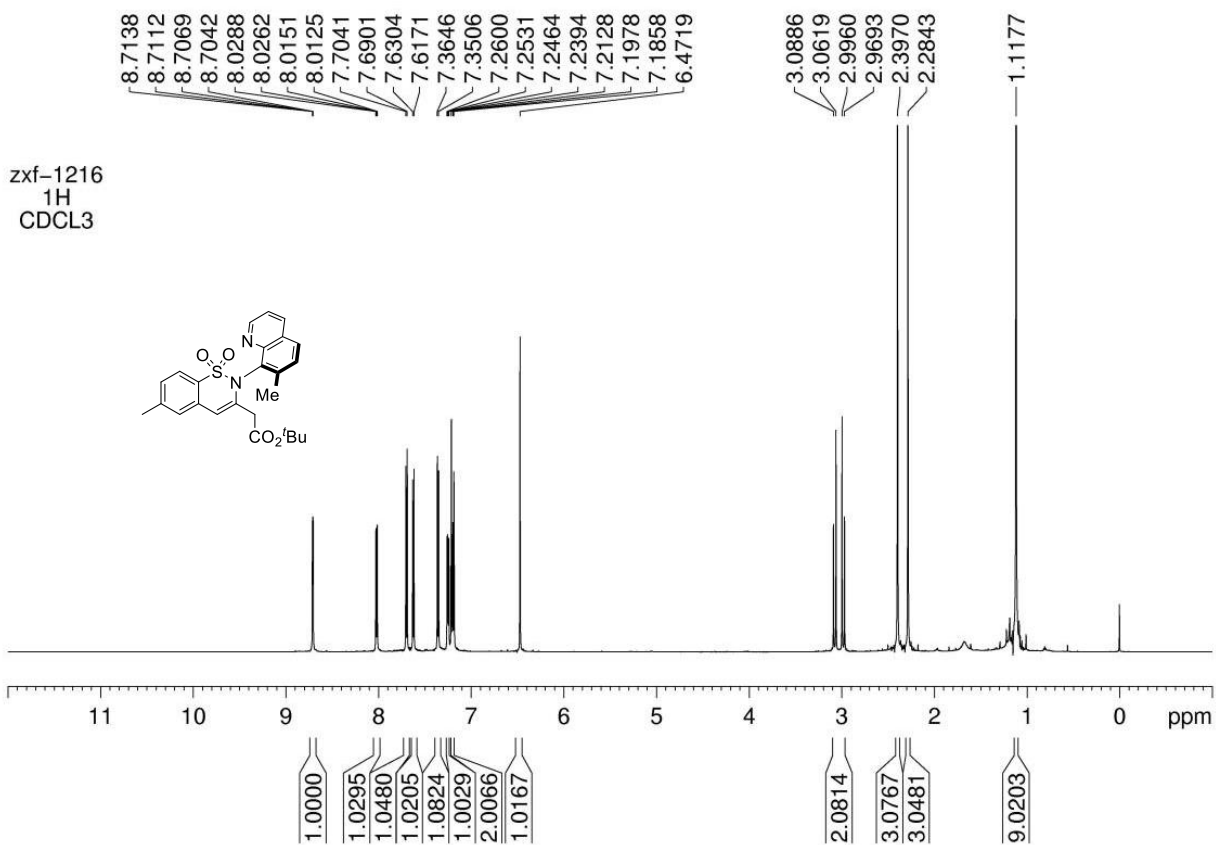

zxf-1216  
13C  
CDCL3

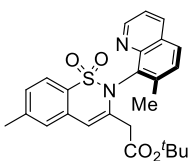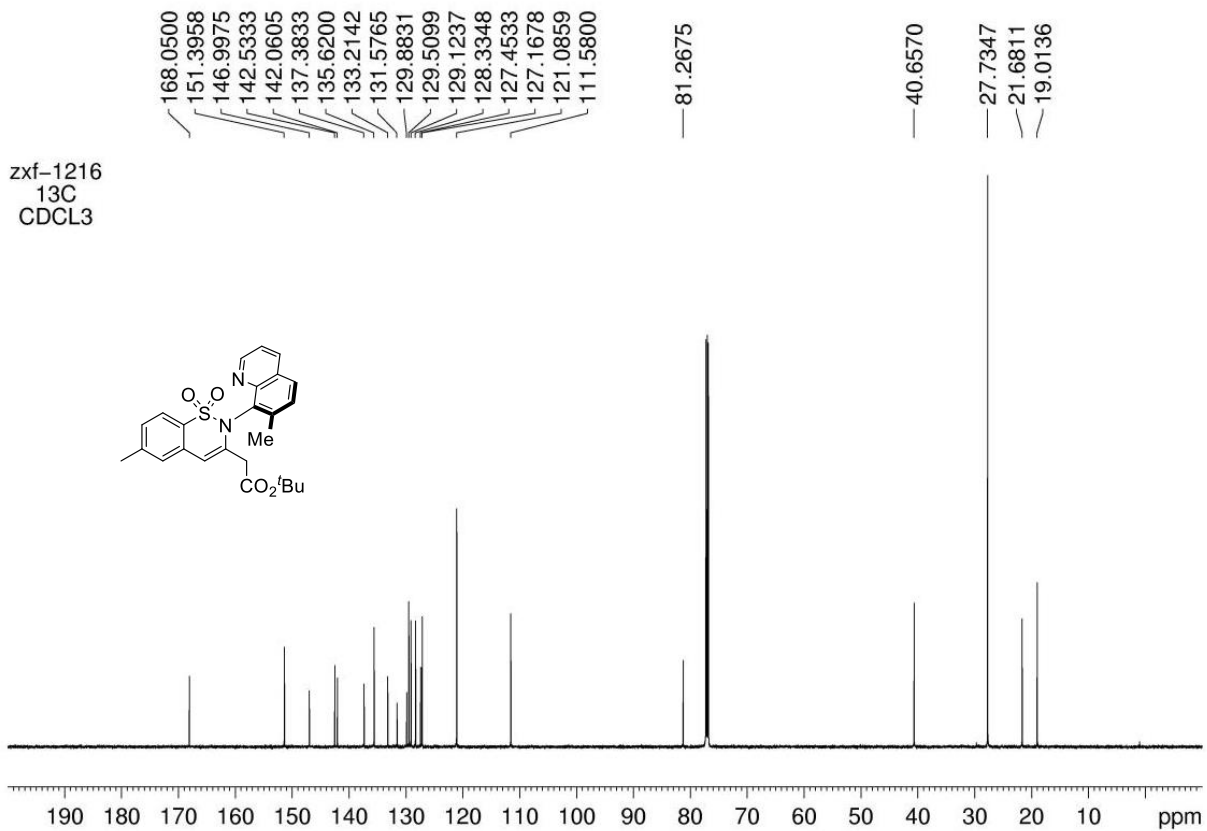

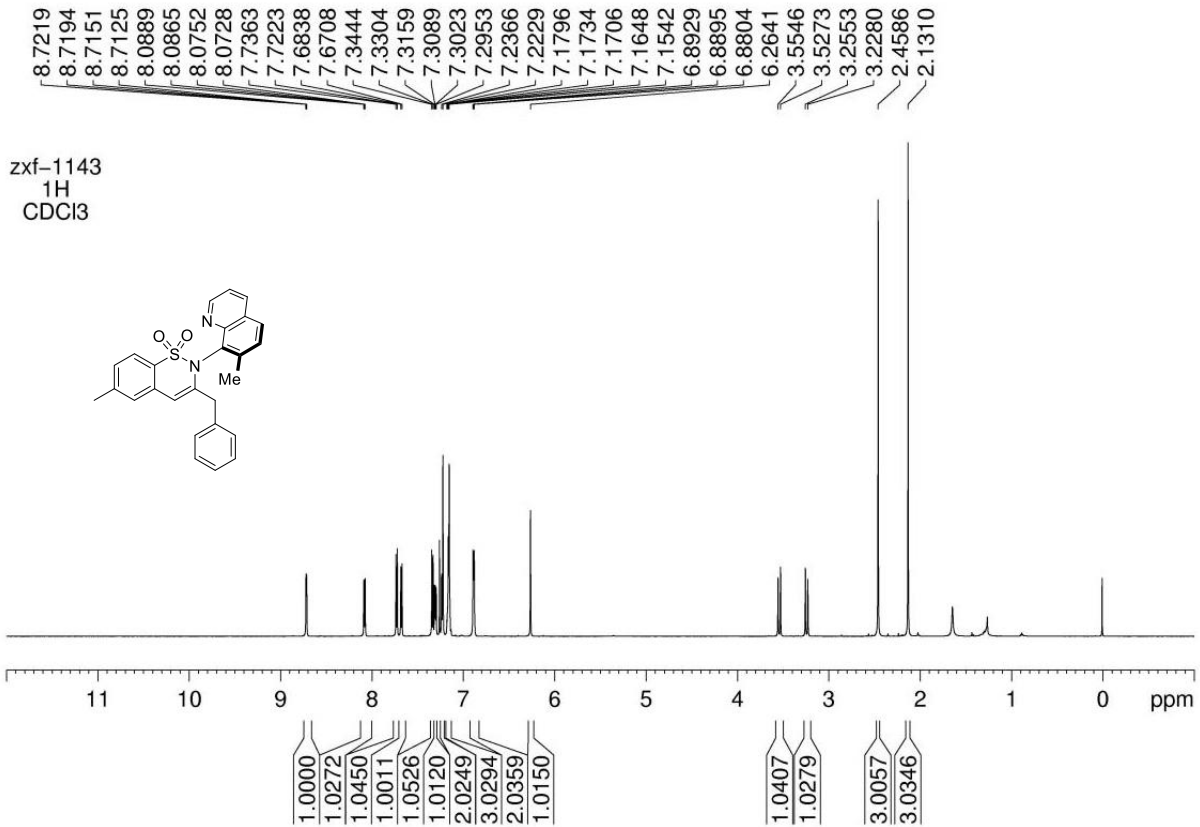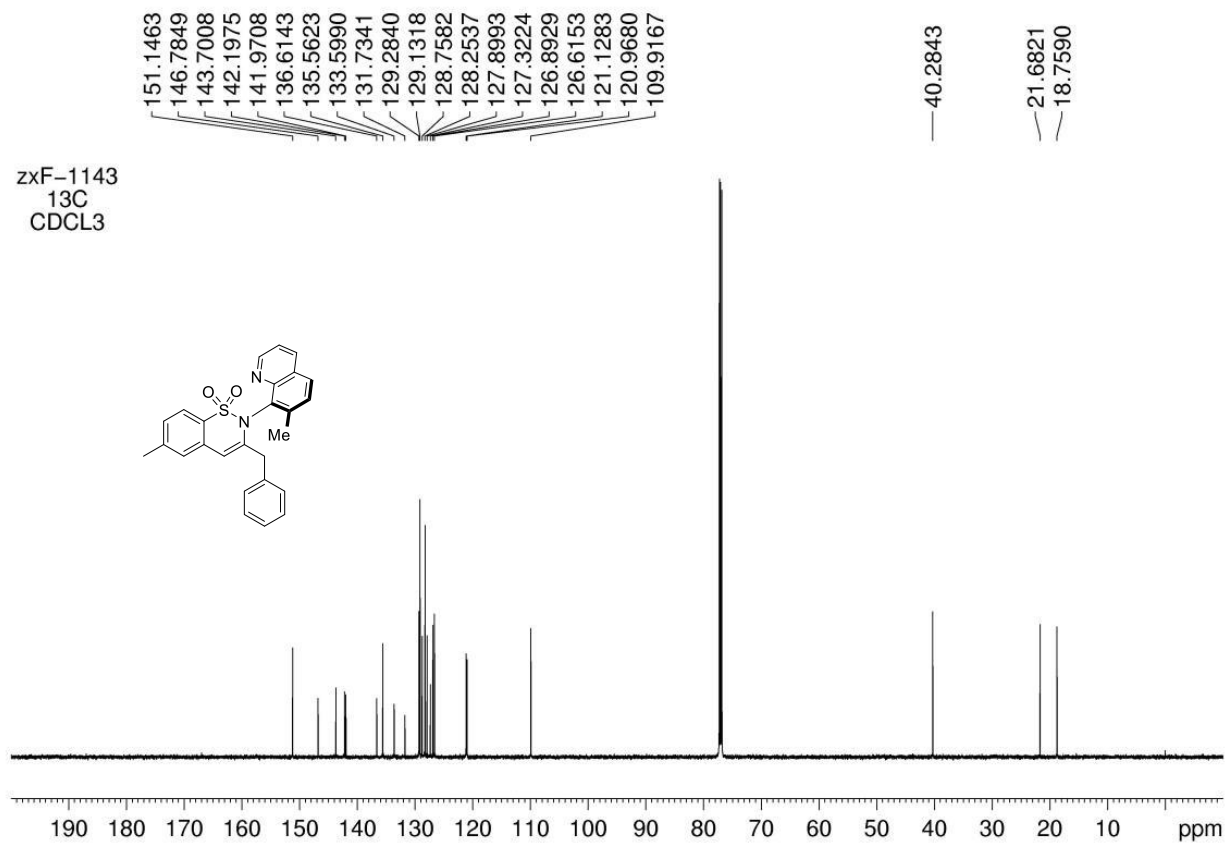

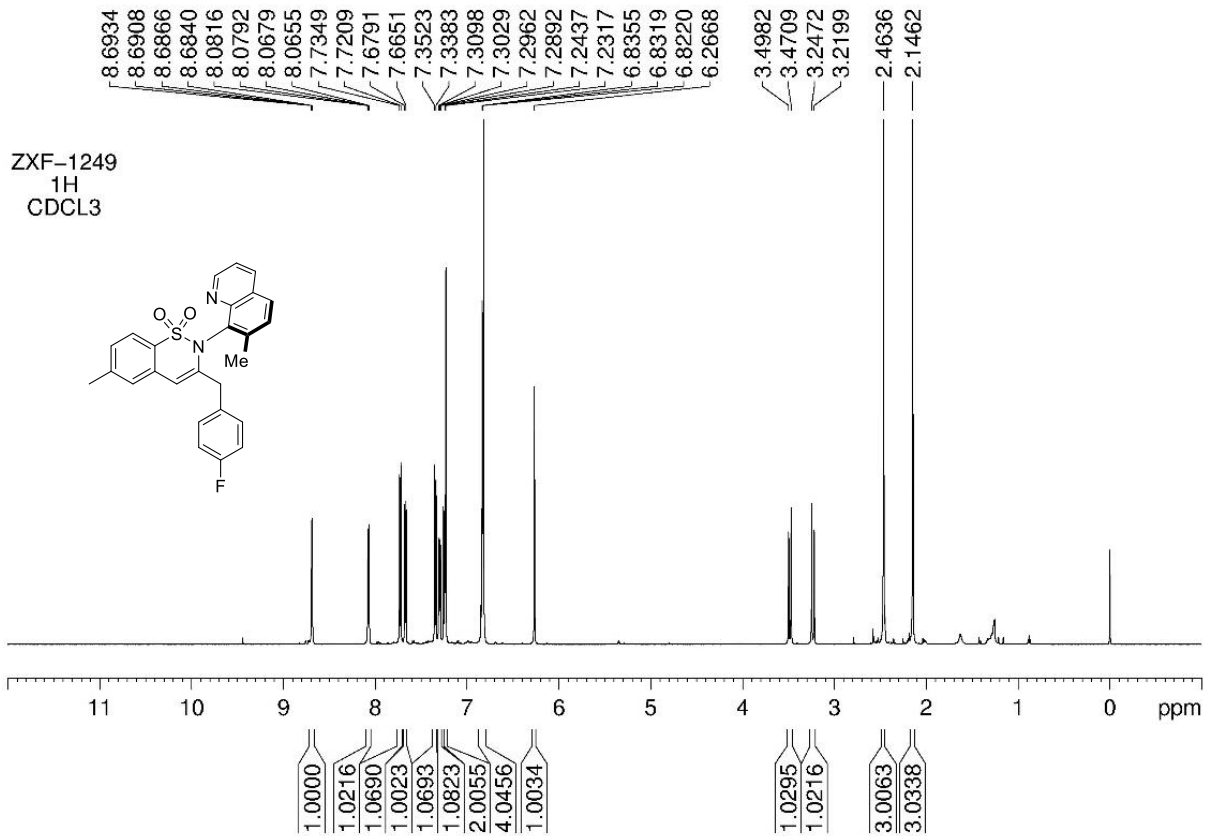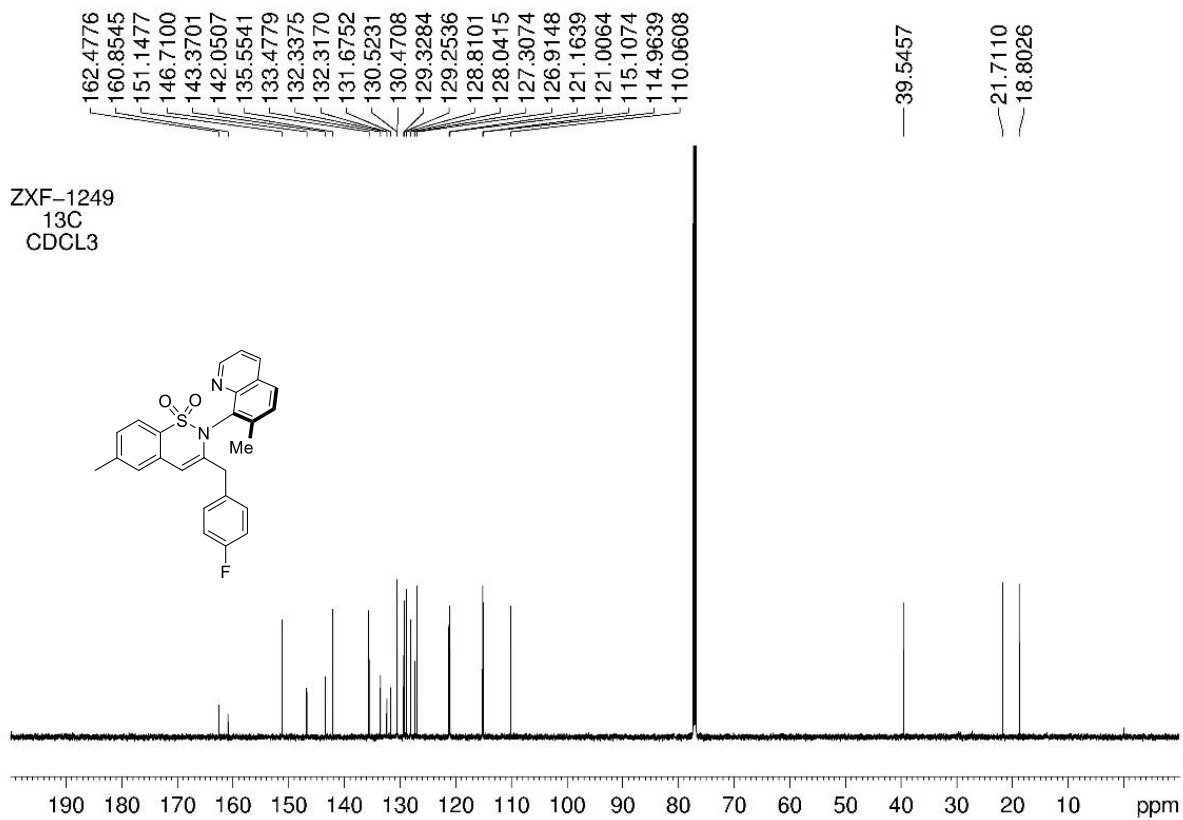



ZXF-1249  
19F  
CDCl3

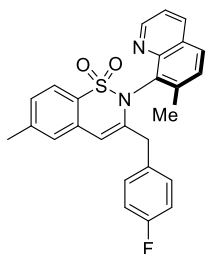

-116.2799

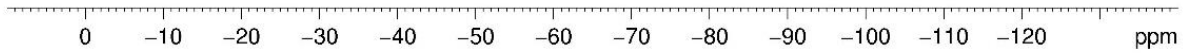

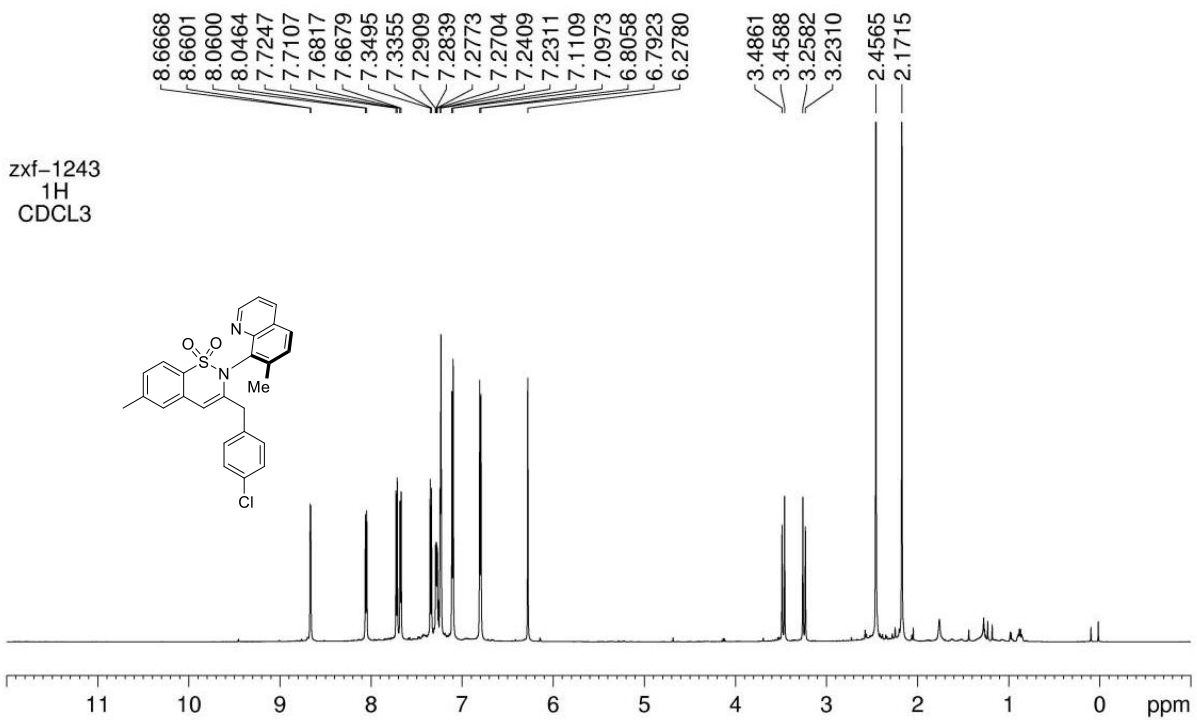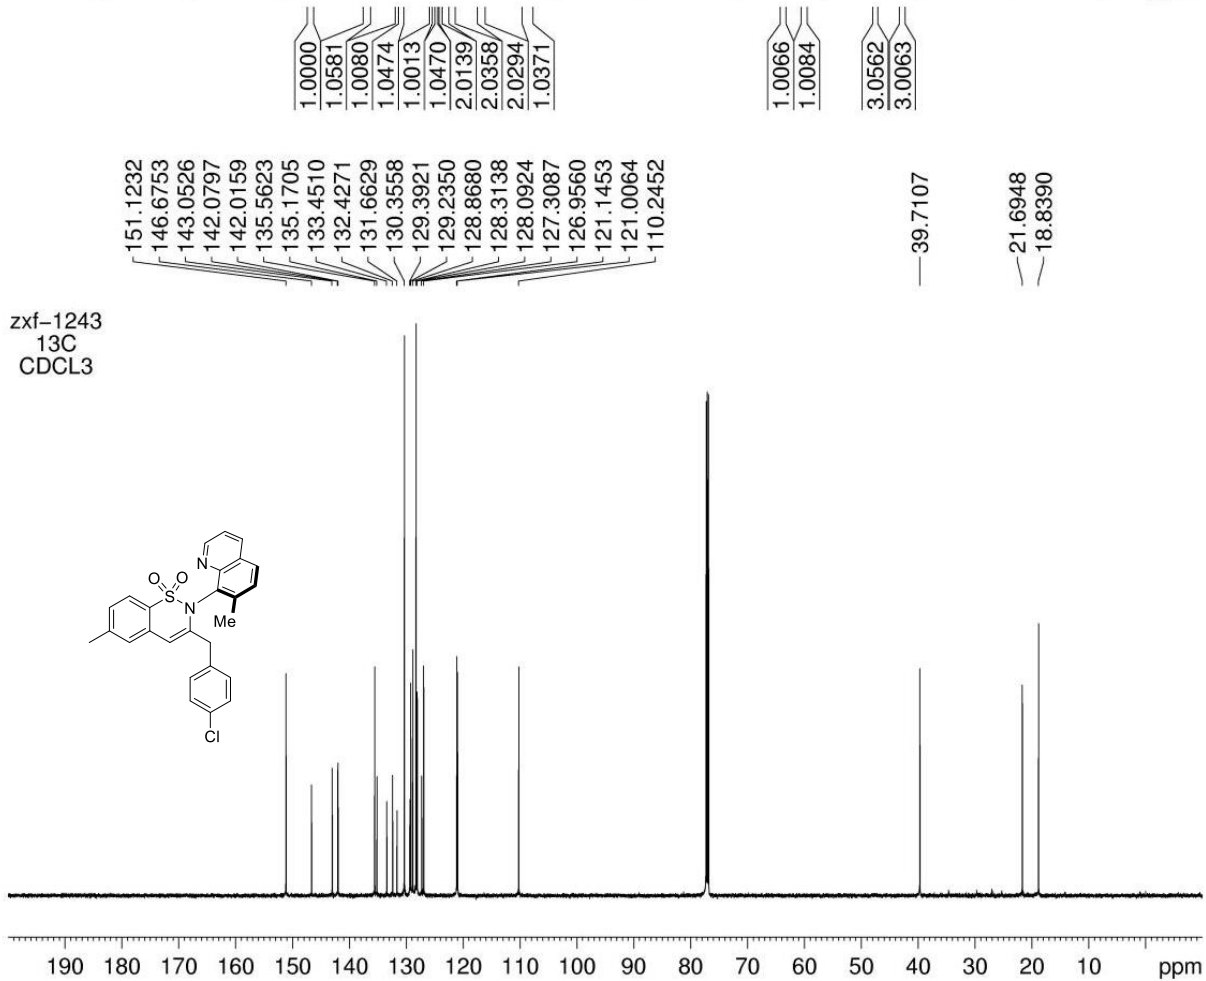

zxf-1241  
1H  
CDCL3

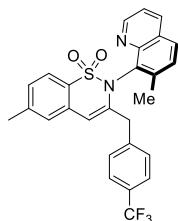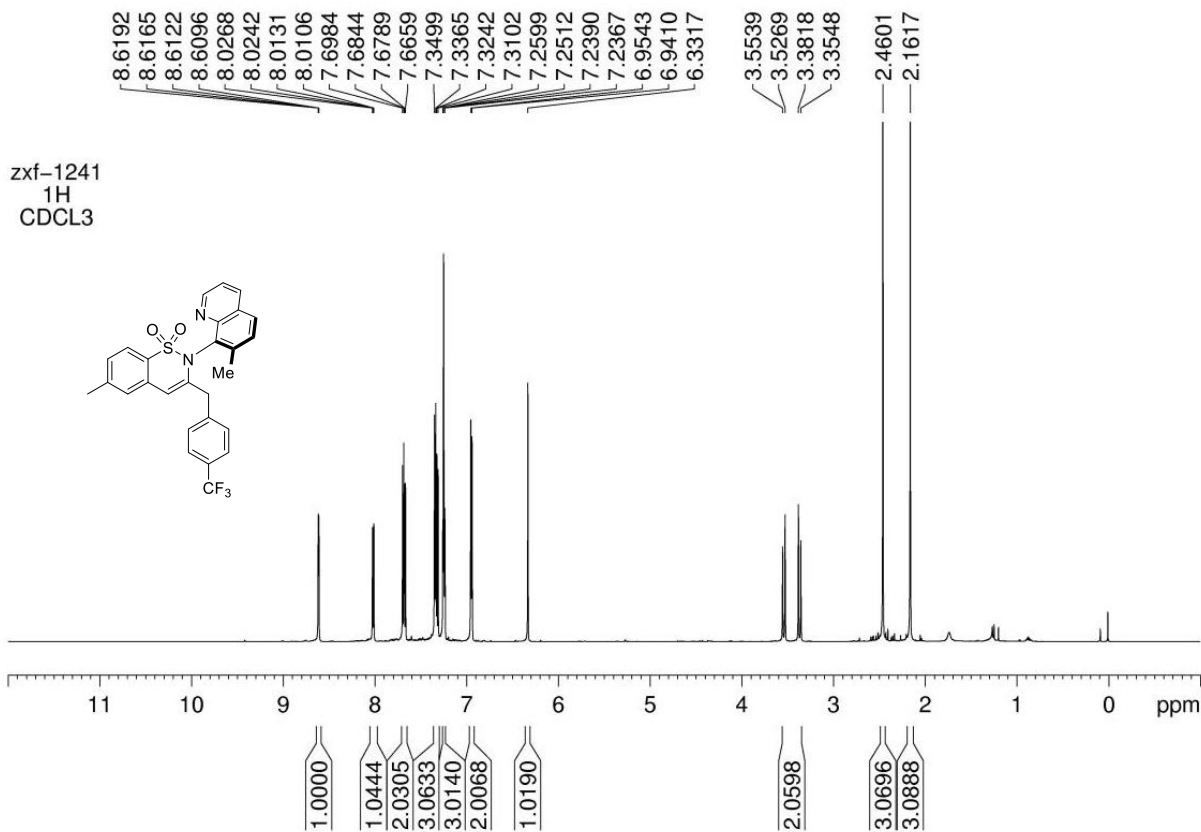

zxf-1241  
13C  
CDCL3

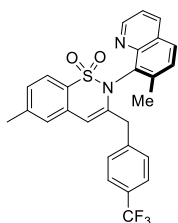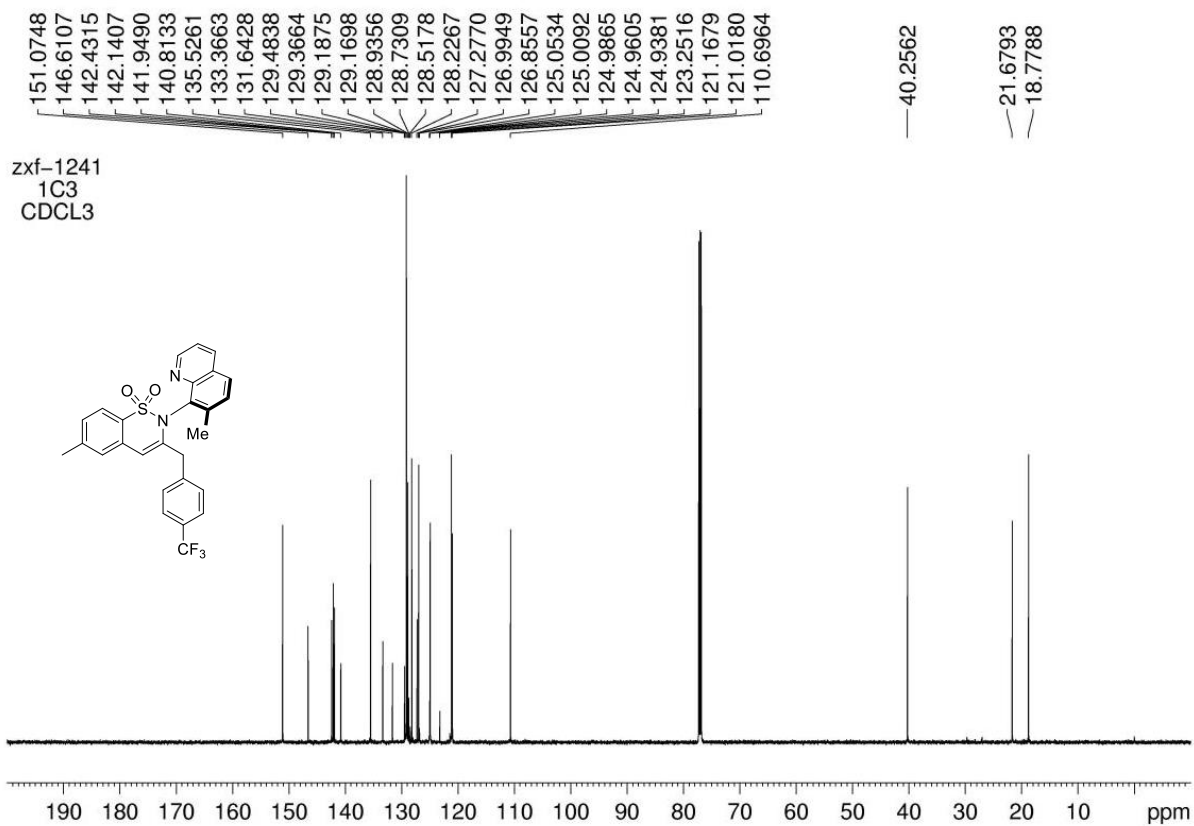

ZXF-1241  
19F  
CDCL3

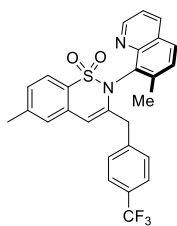

-62.4406

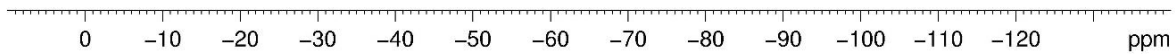

ZXF-1209  
<sup>1</sup>H  
 CDCl<sub>3</sub>

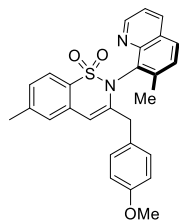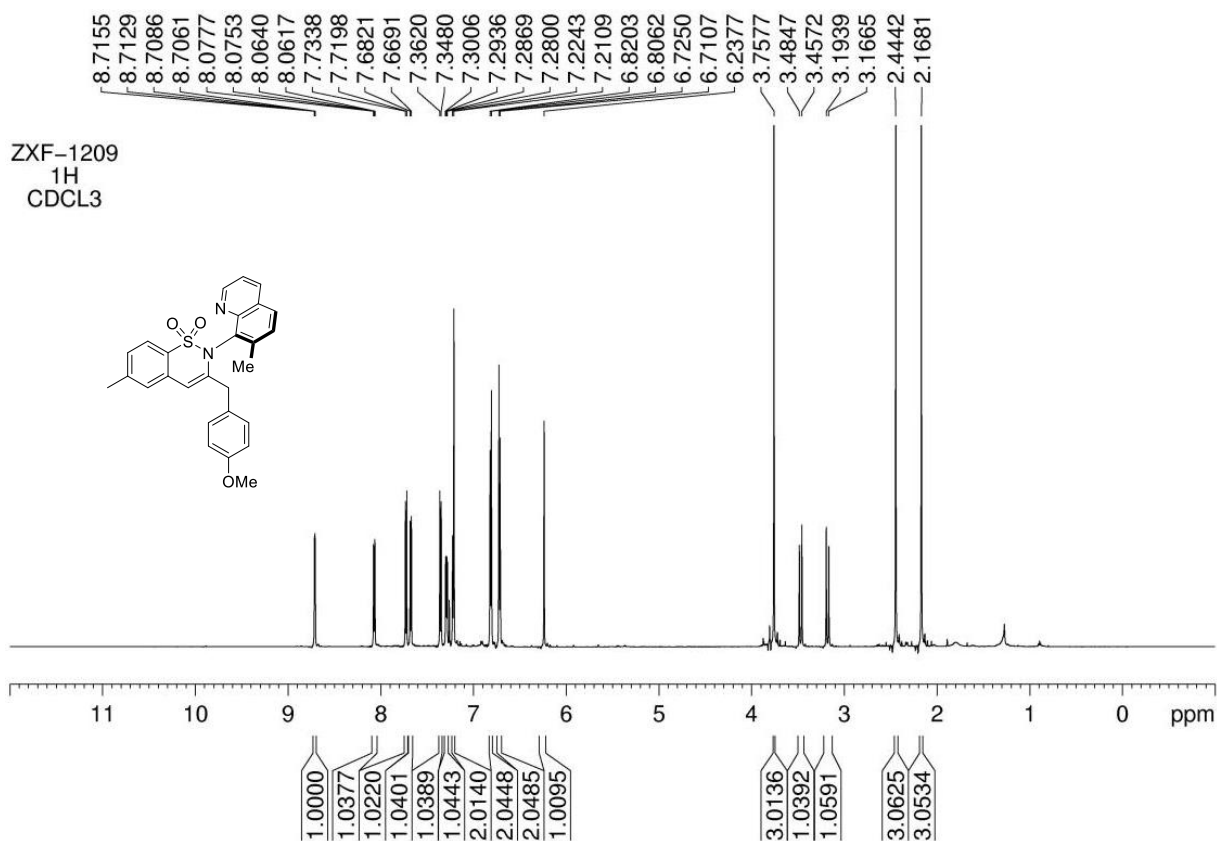

zxf-1209  
<sup>13</sup>C  
 CDCl<sub>3</sub>

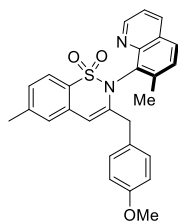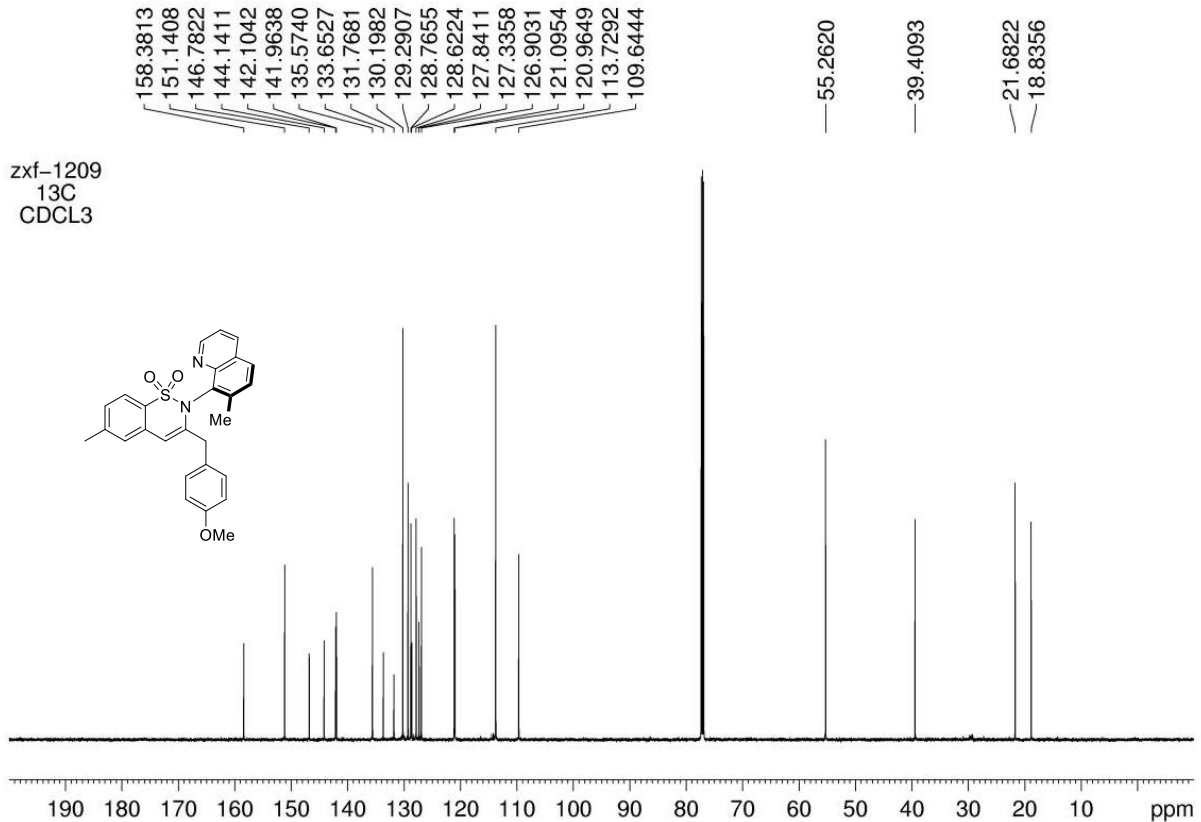

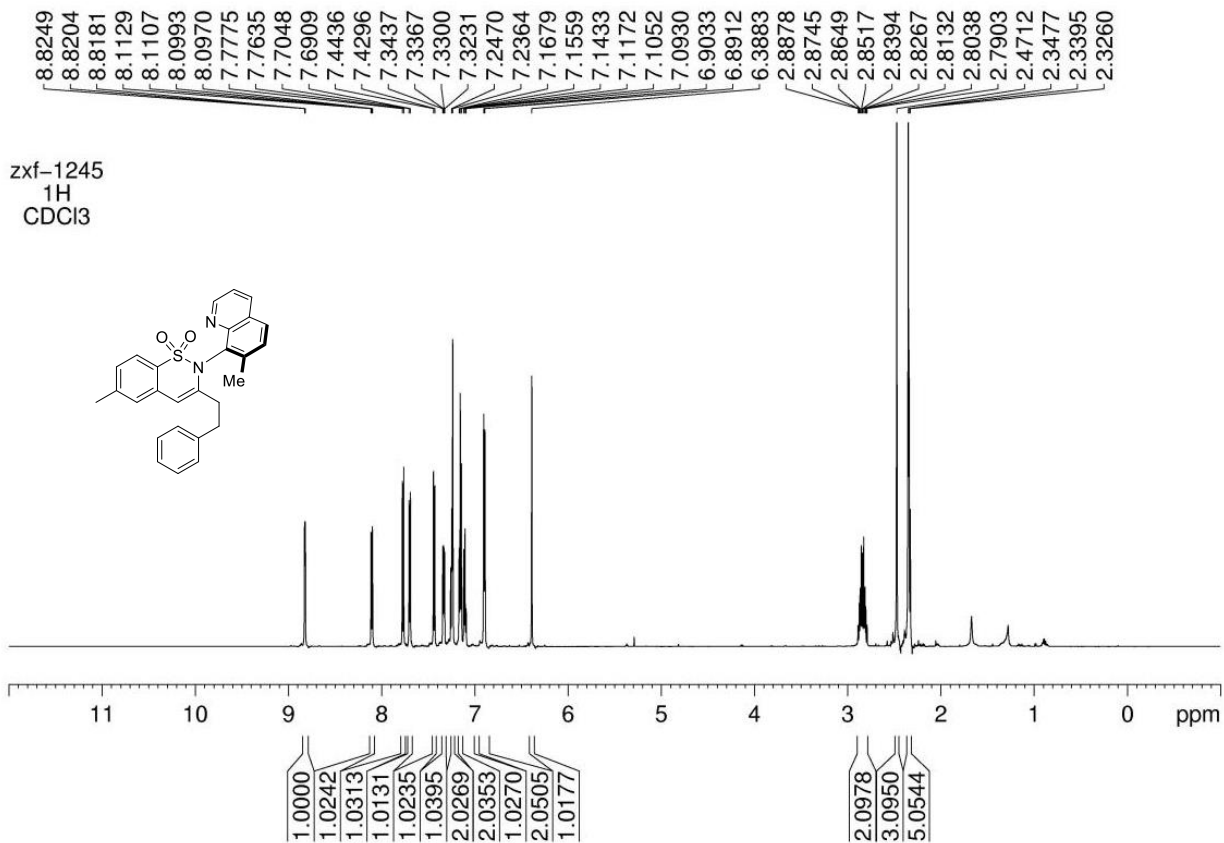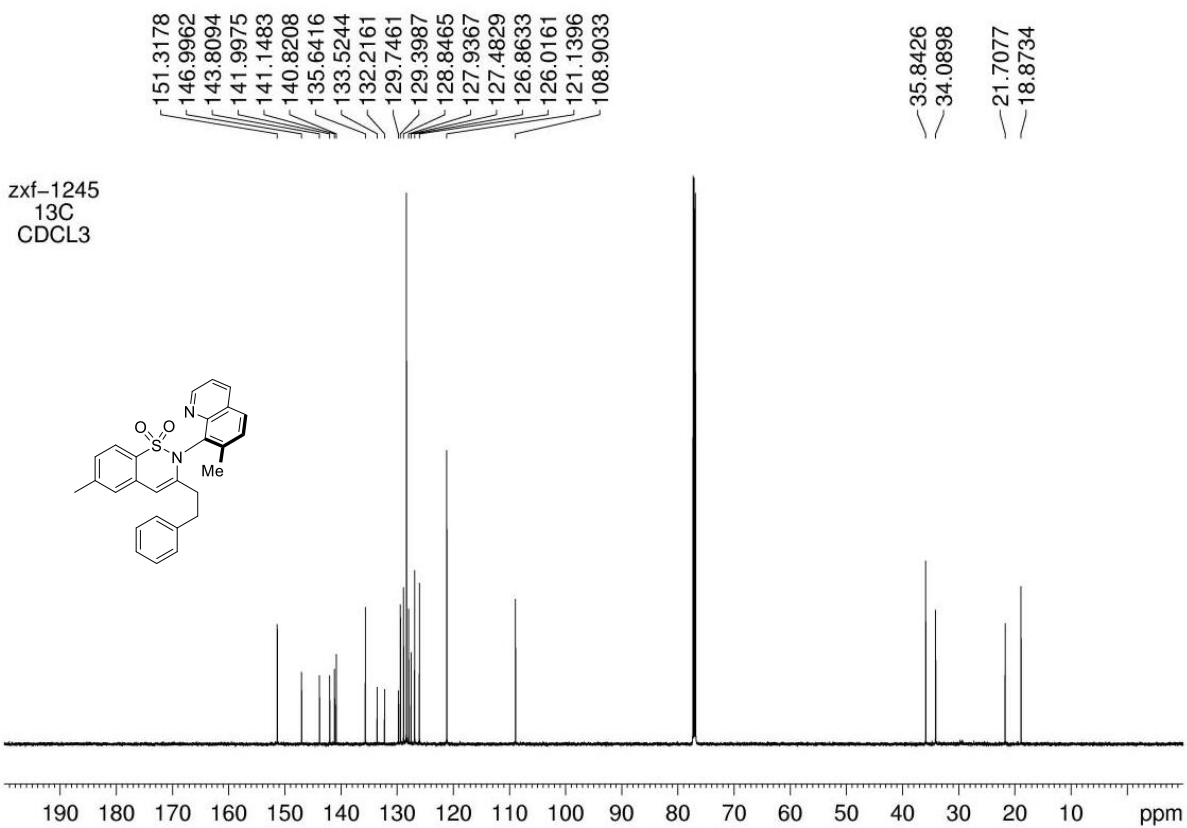

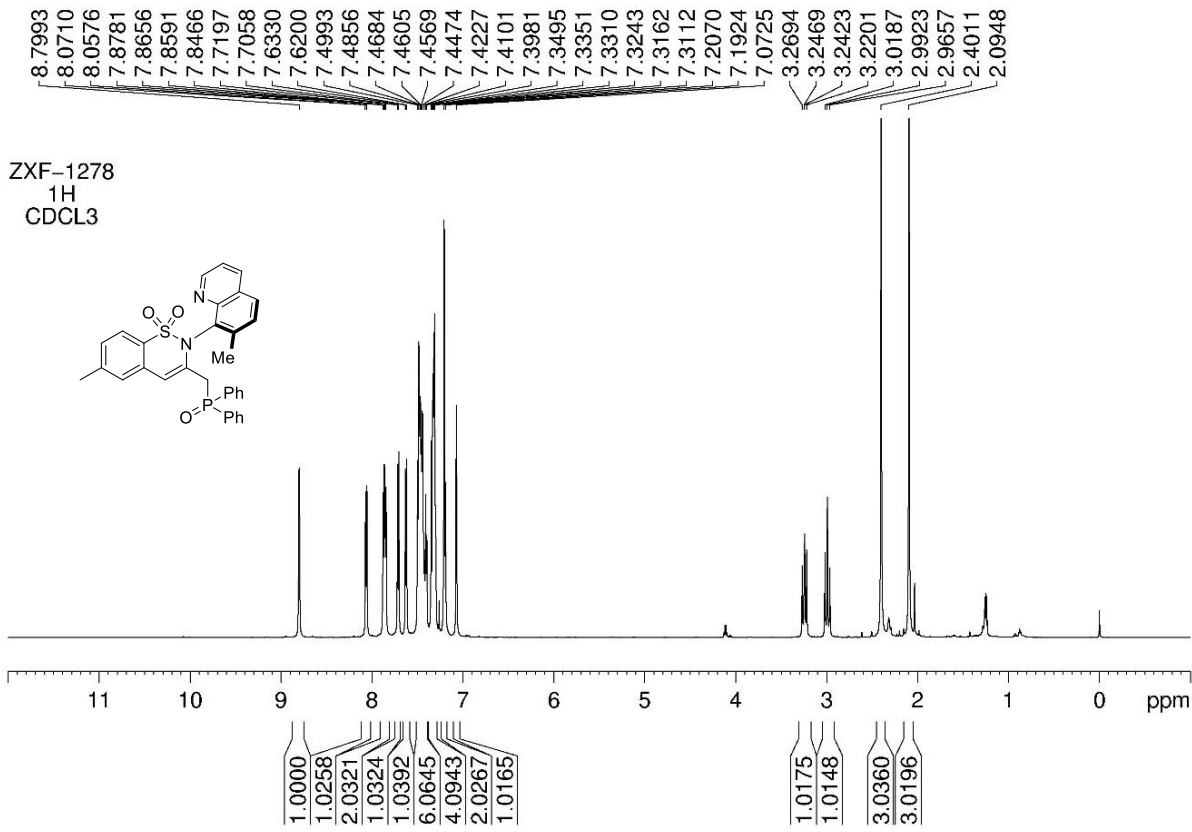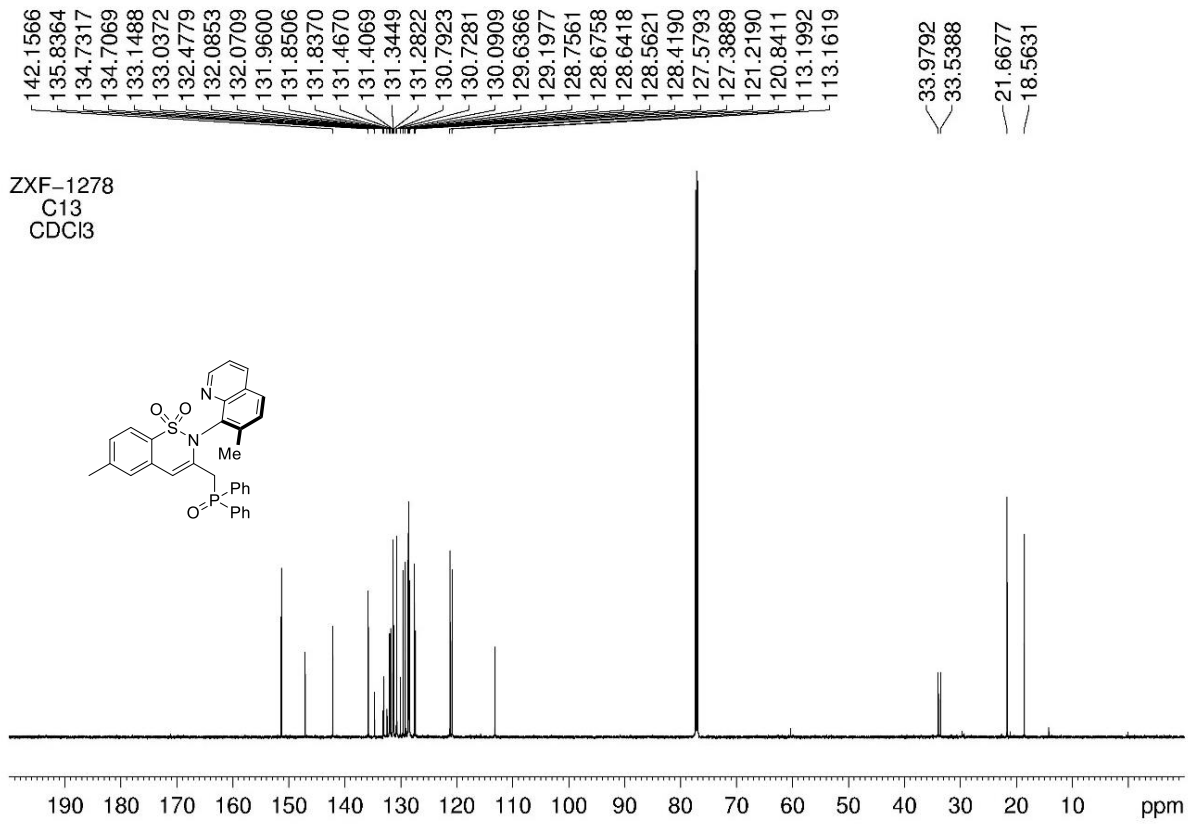

ZXF-1278  
31P  
CDCl3

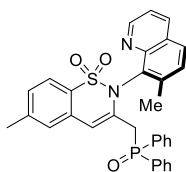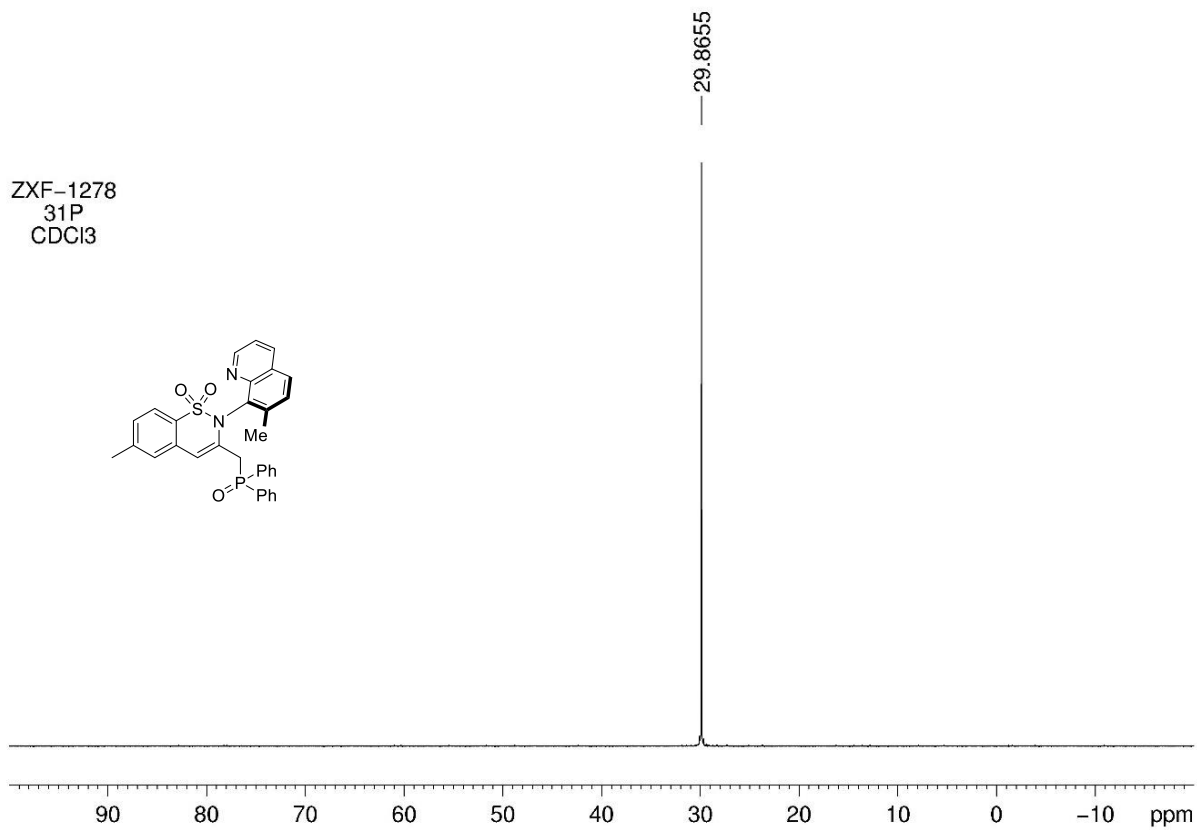



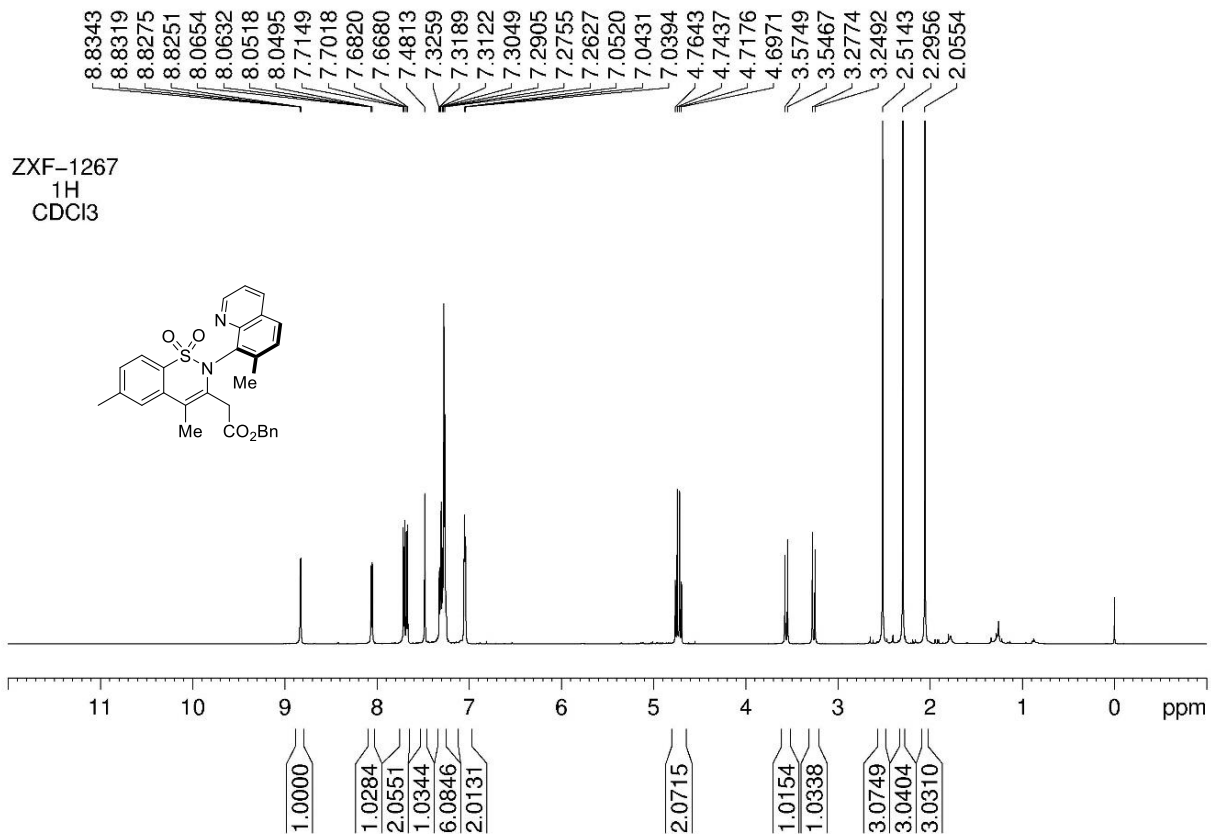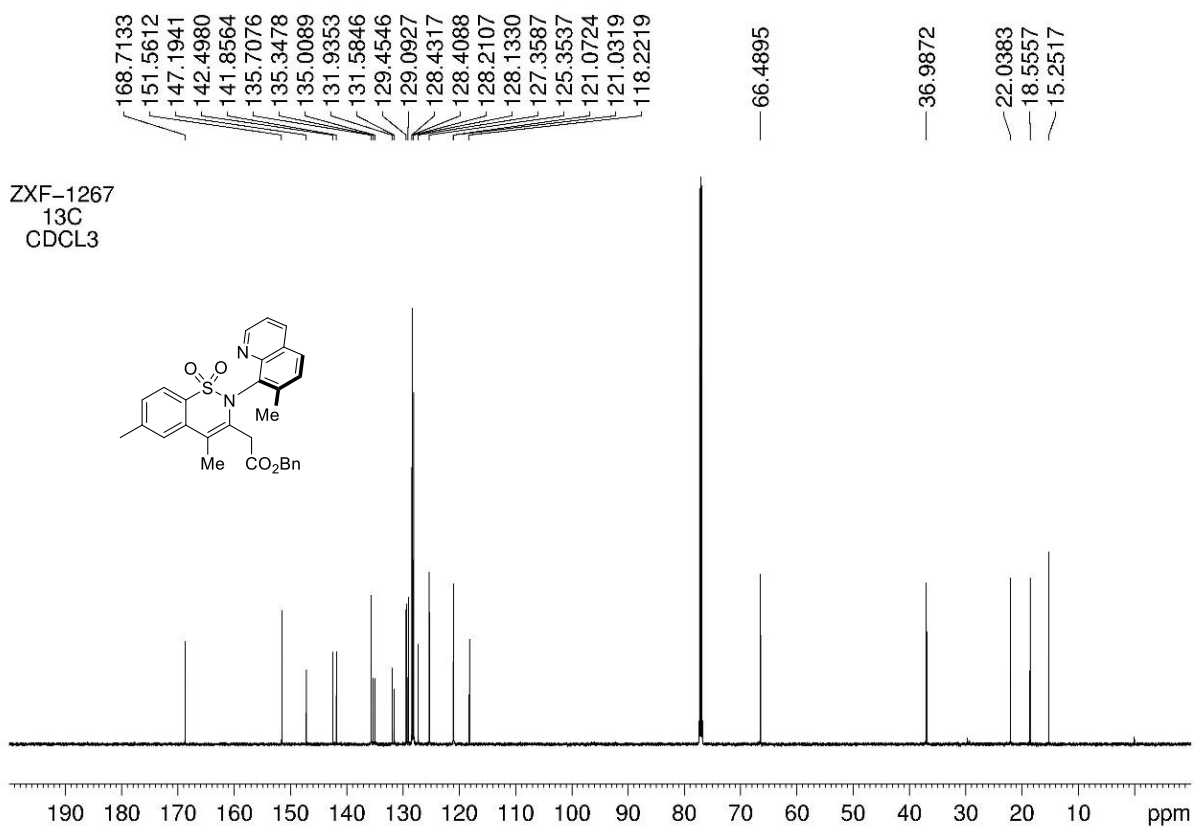

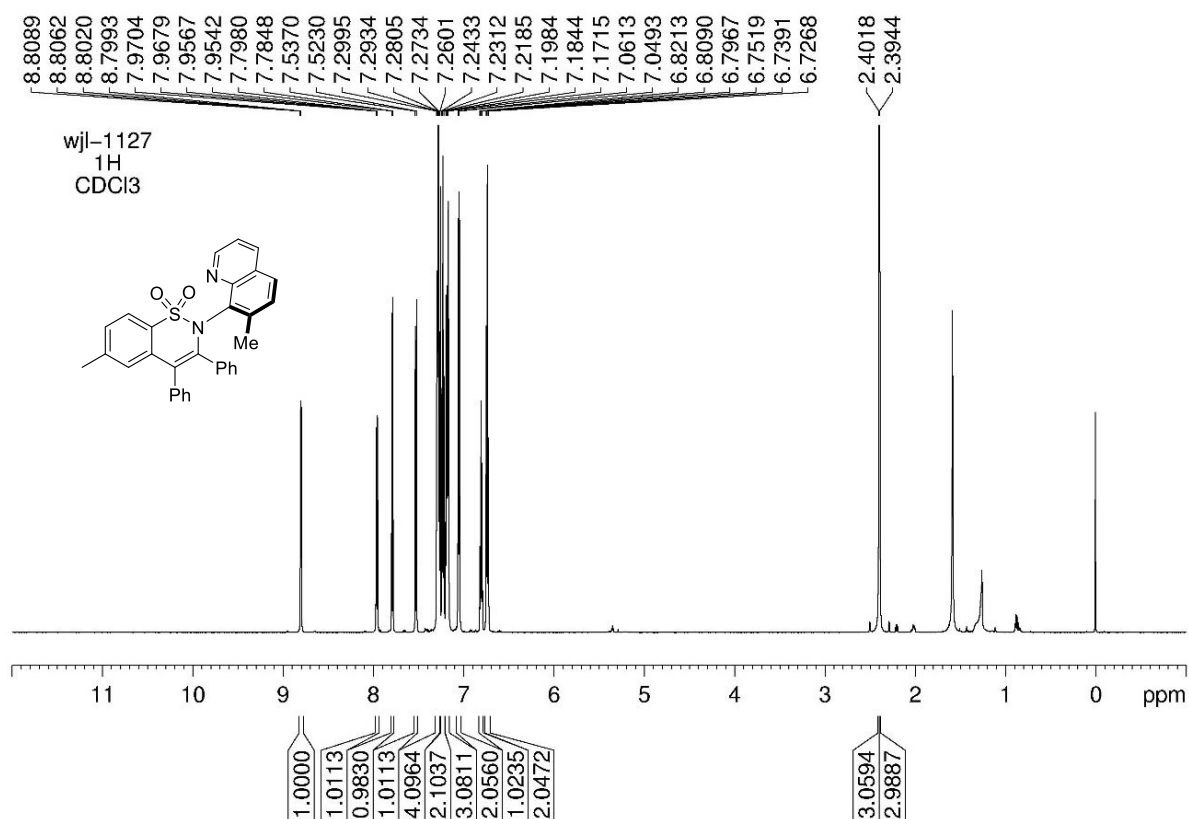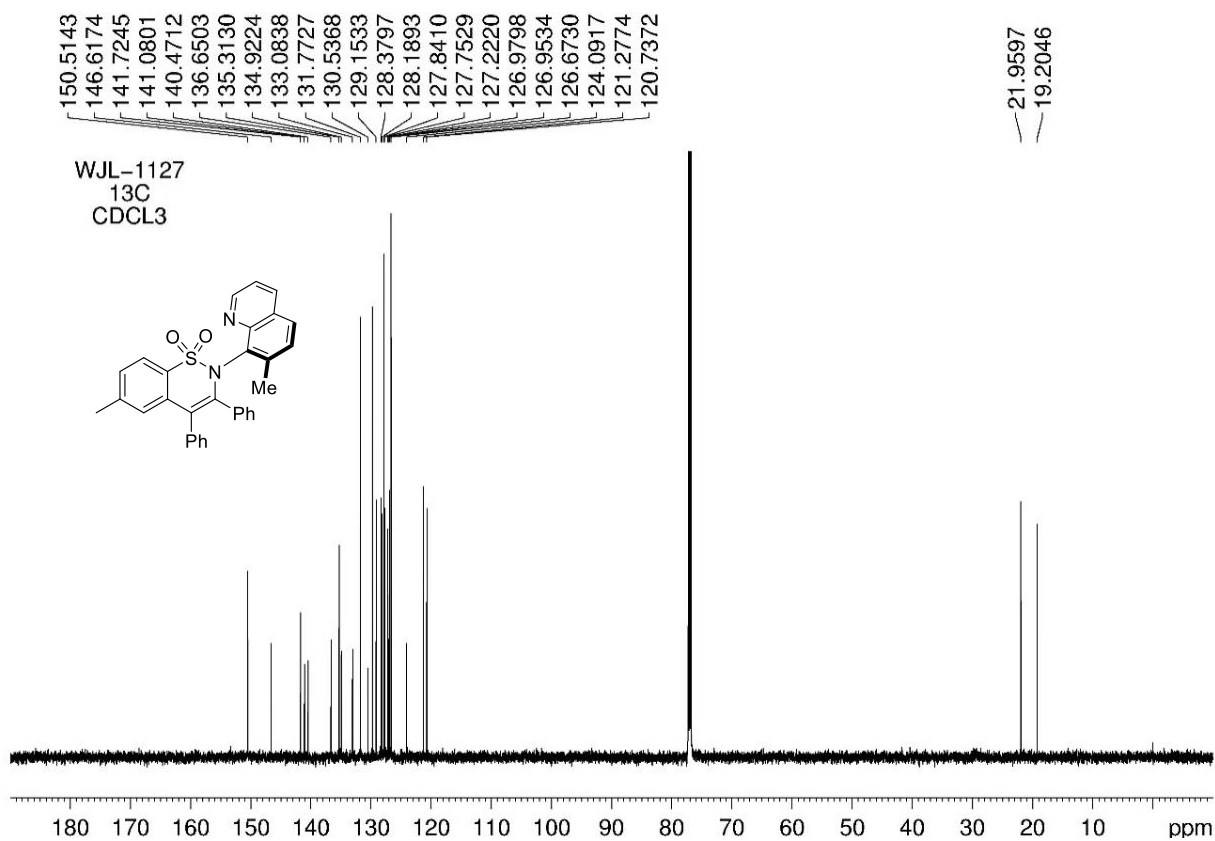

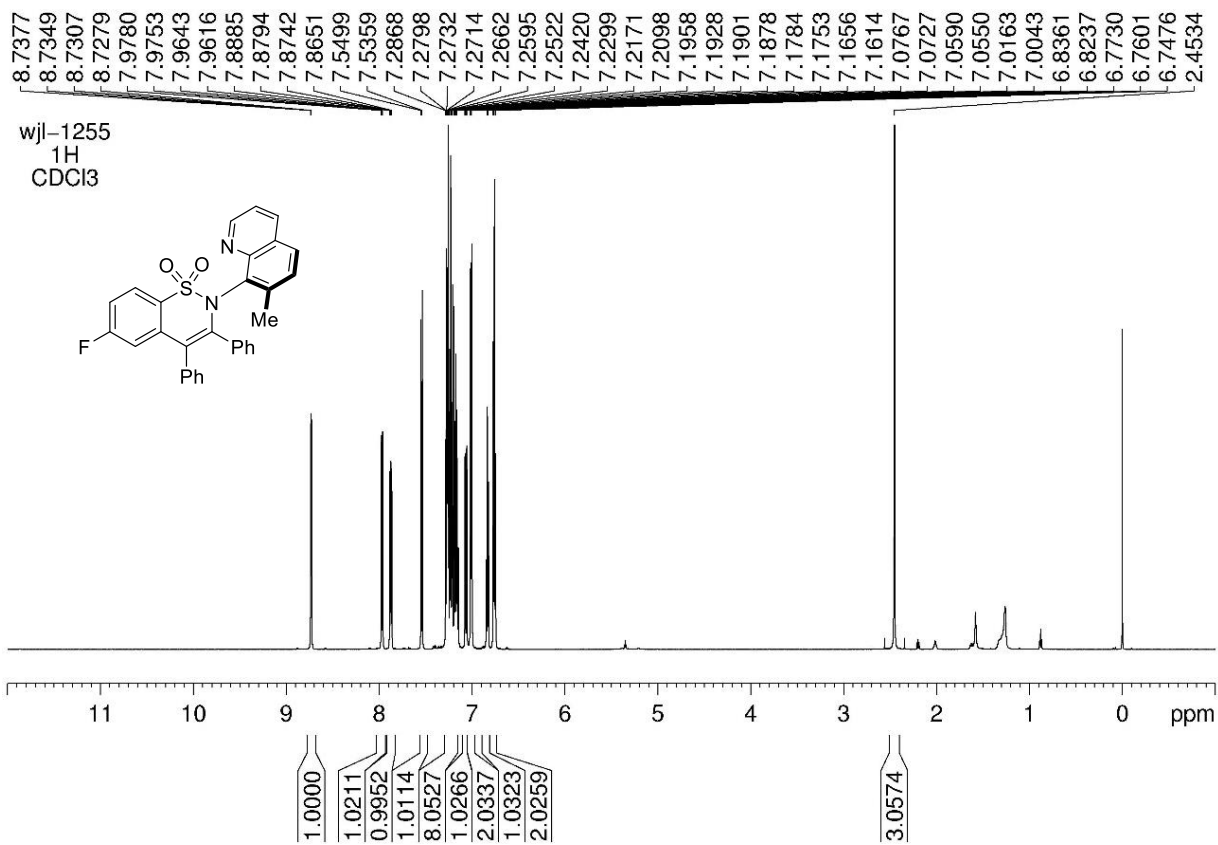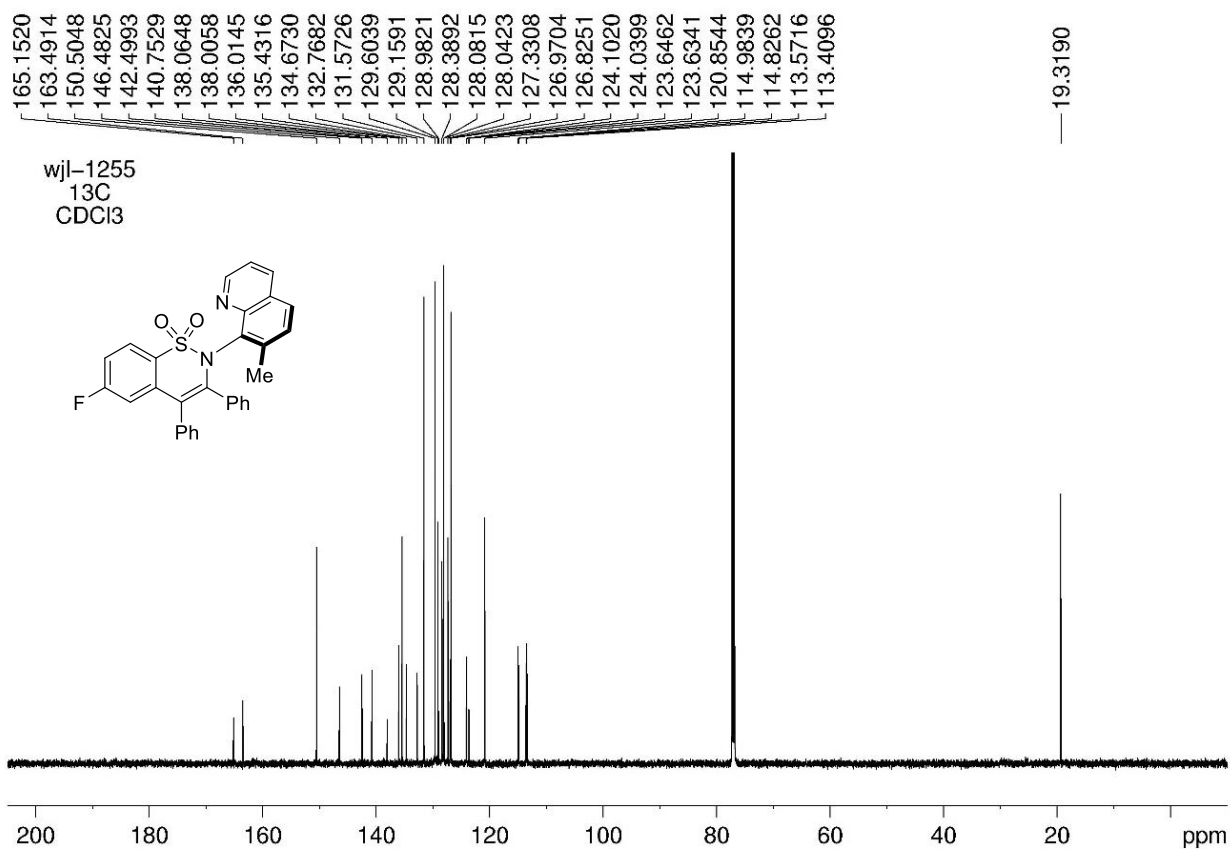

wj-1255  
19F  
CDCl3

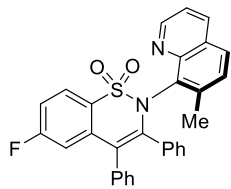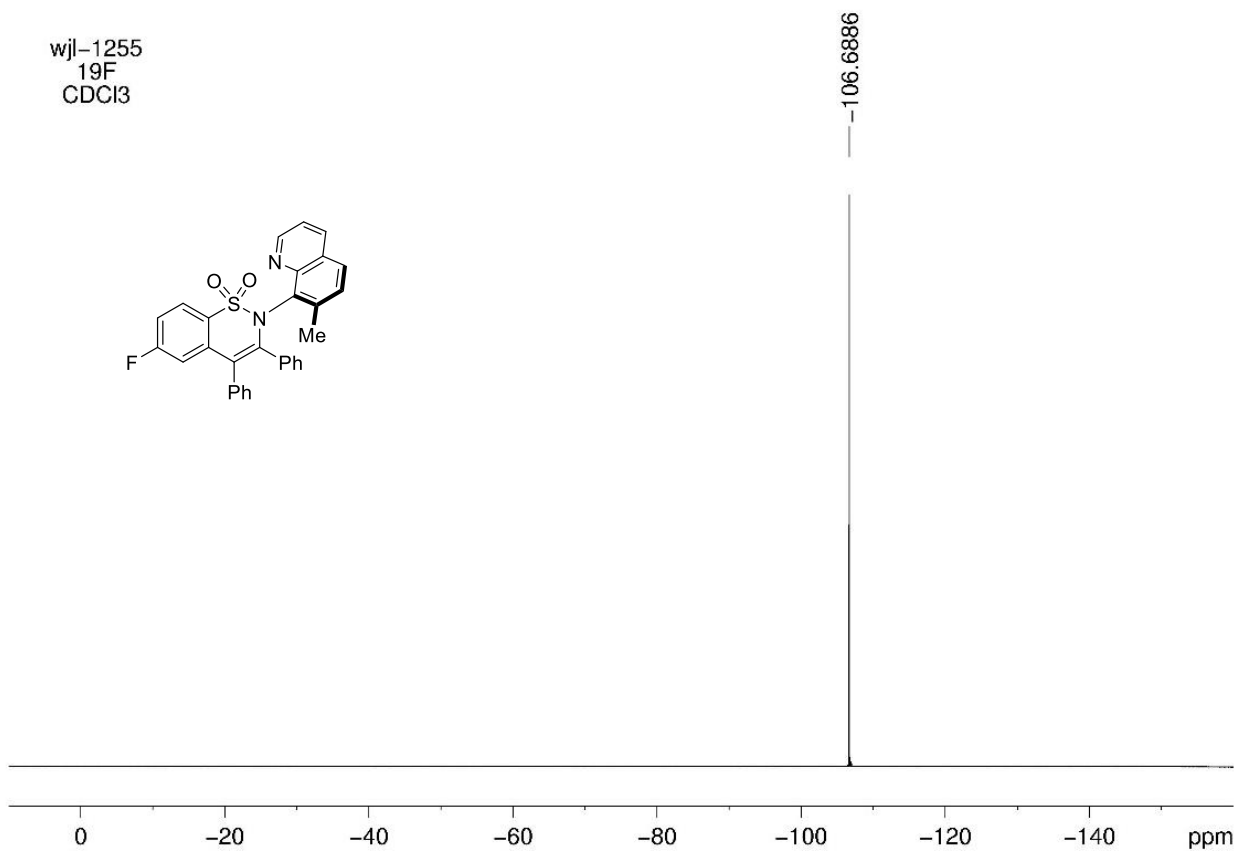

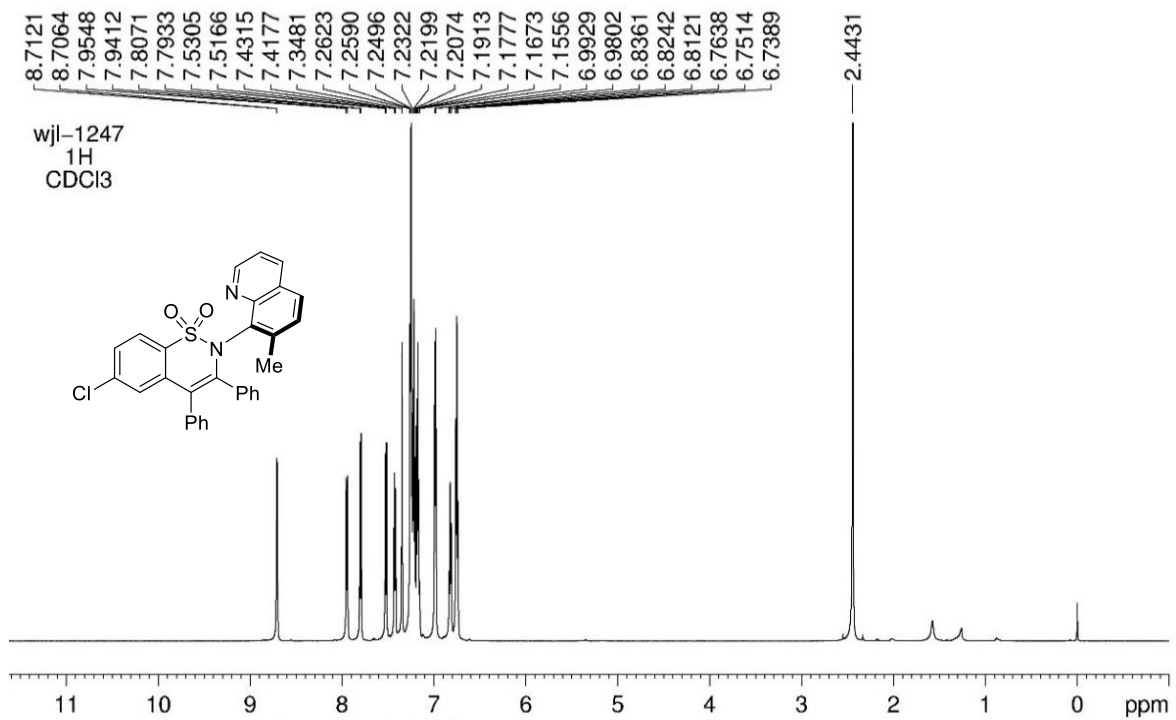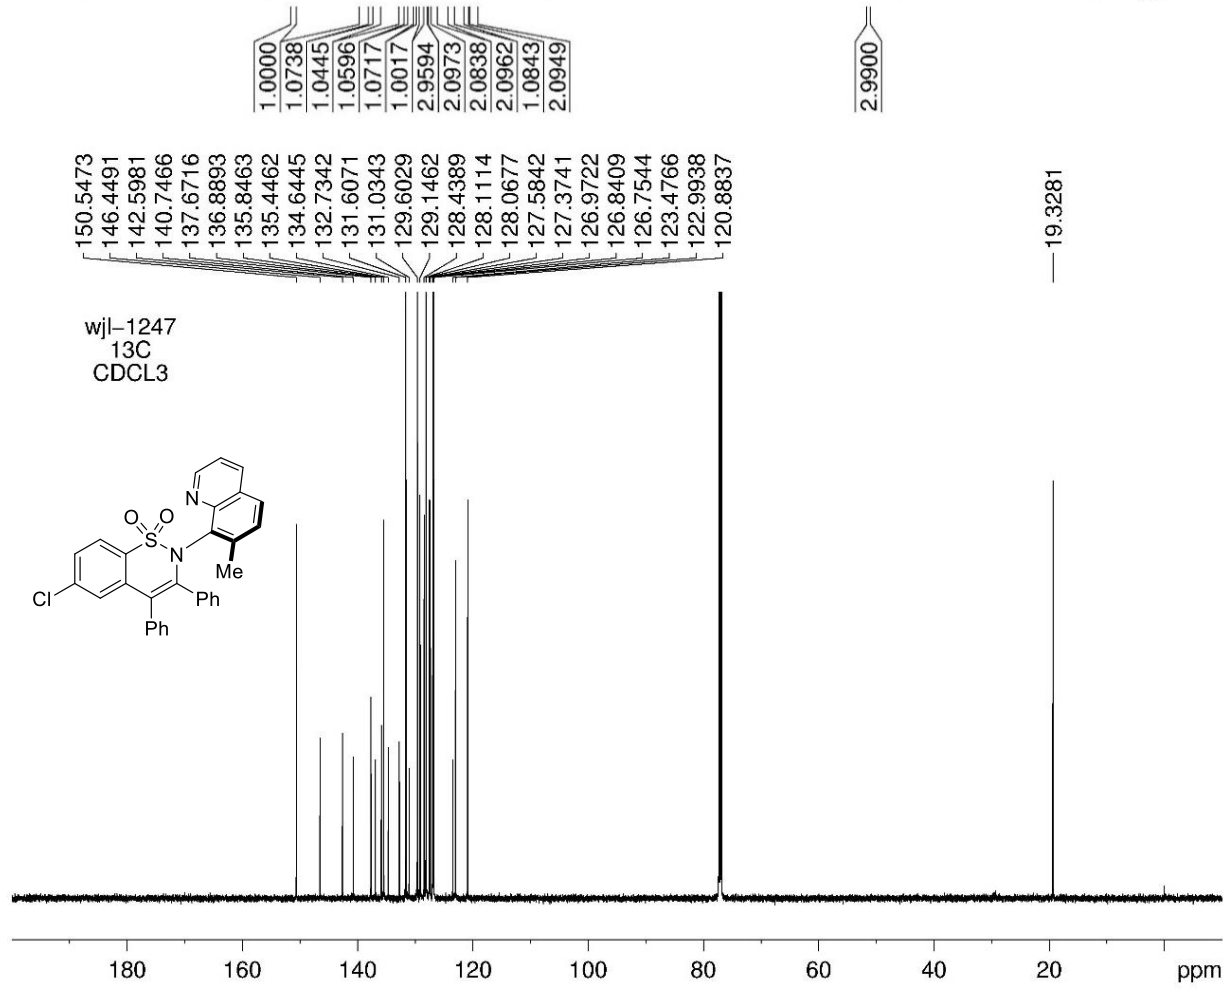

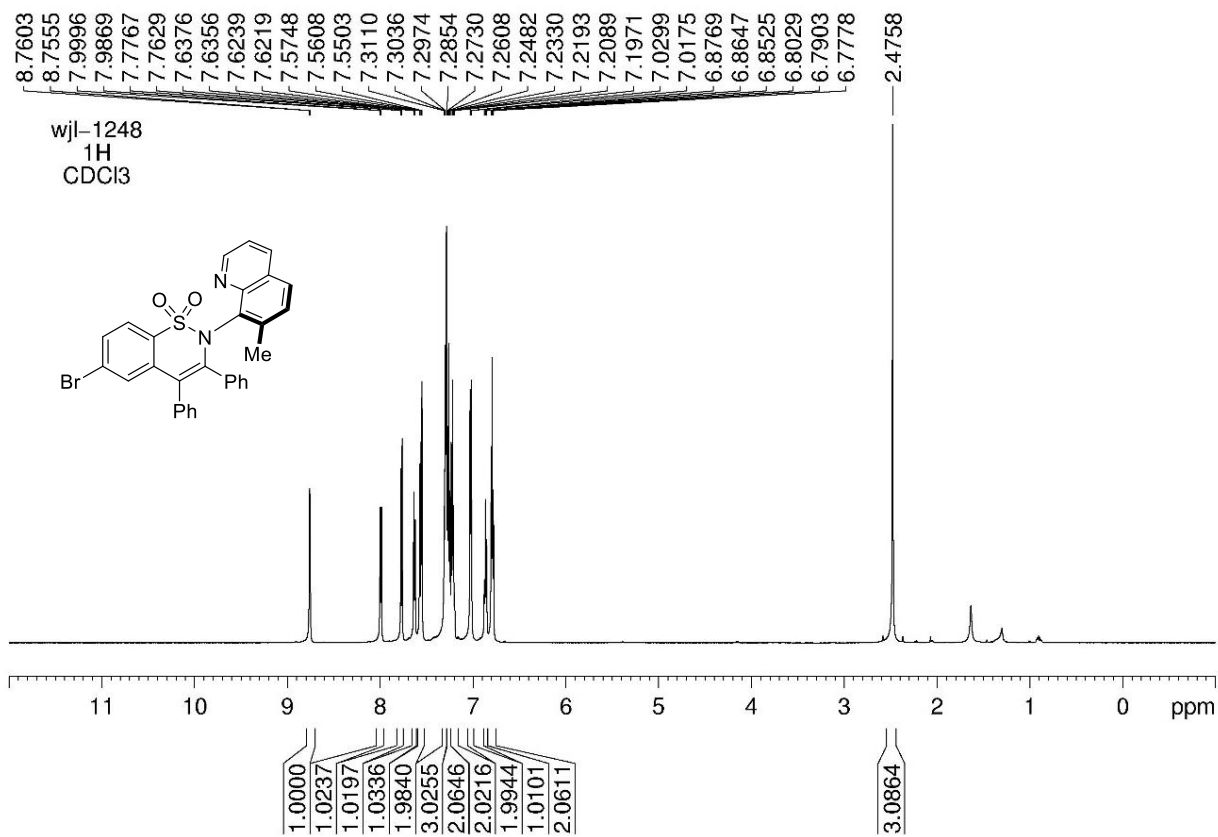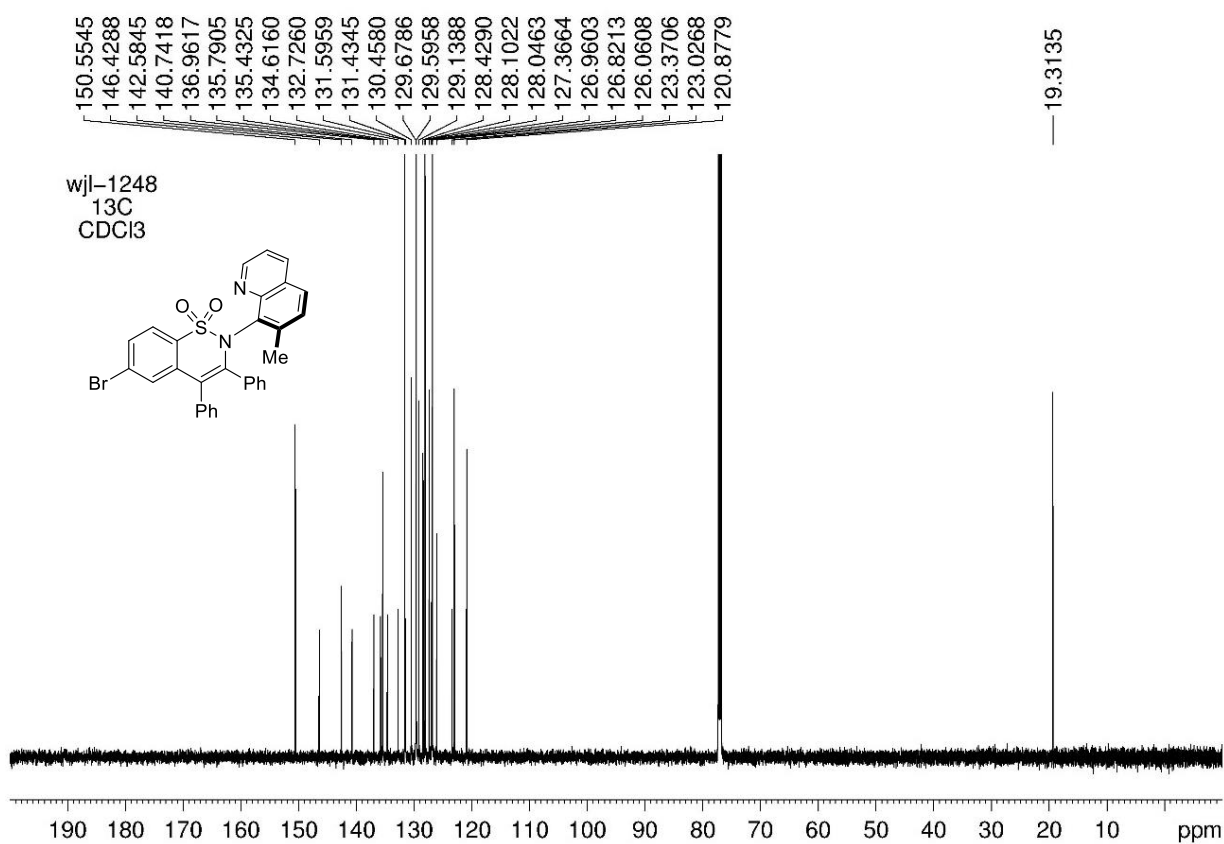

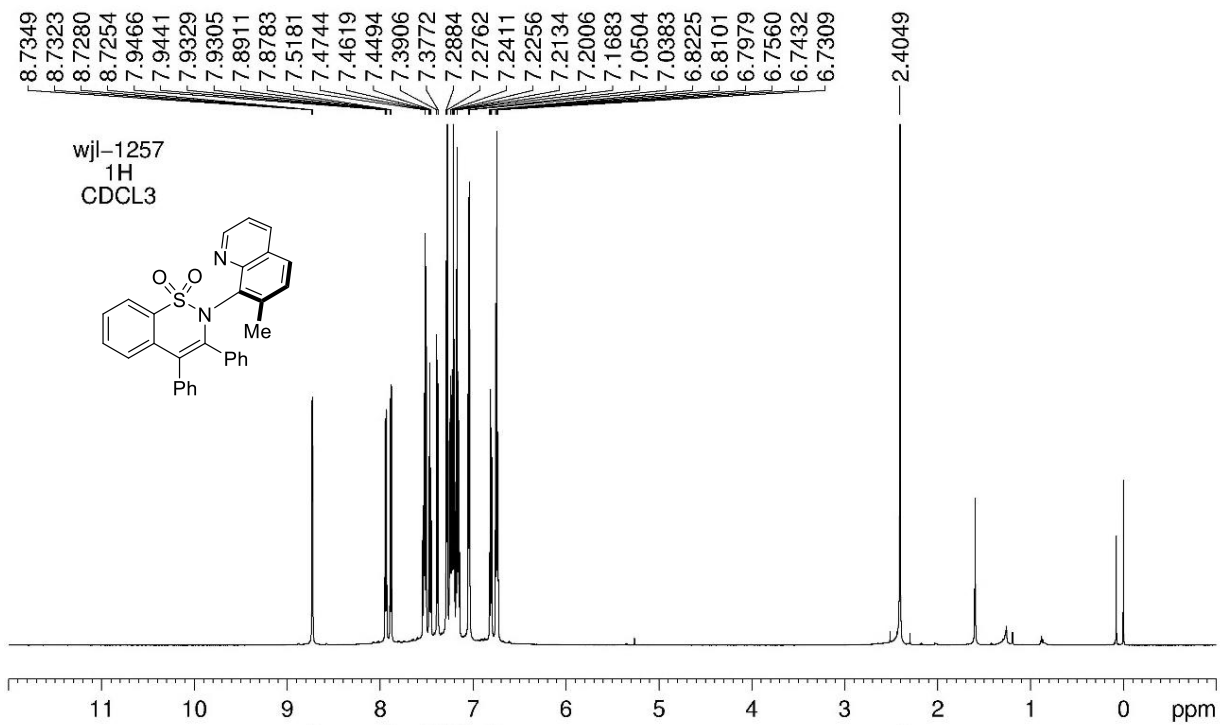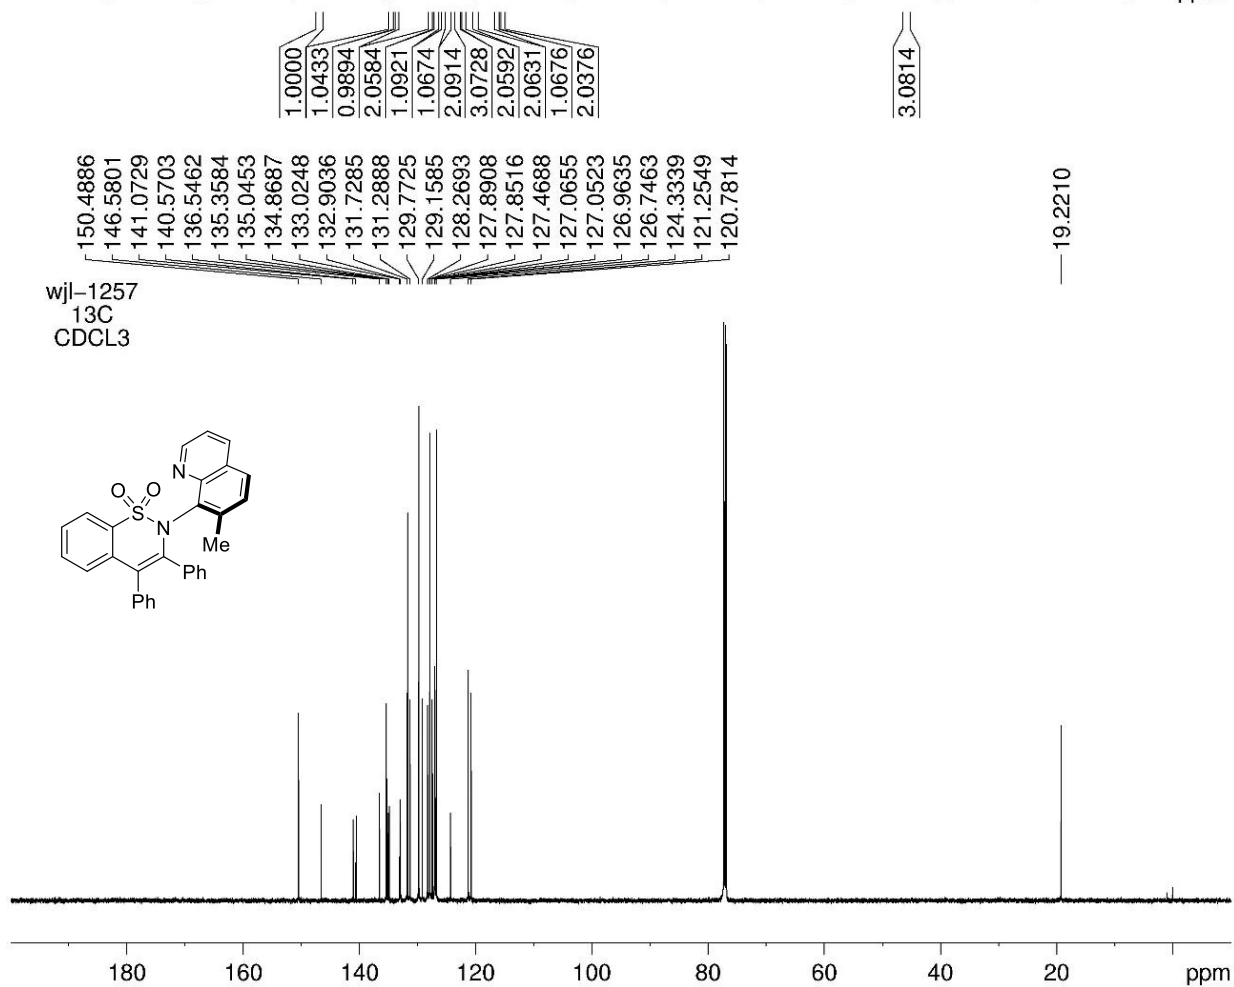

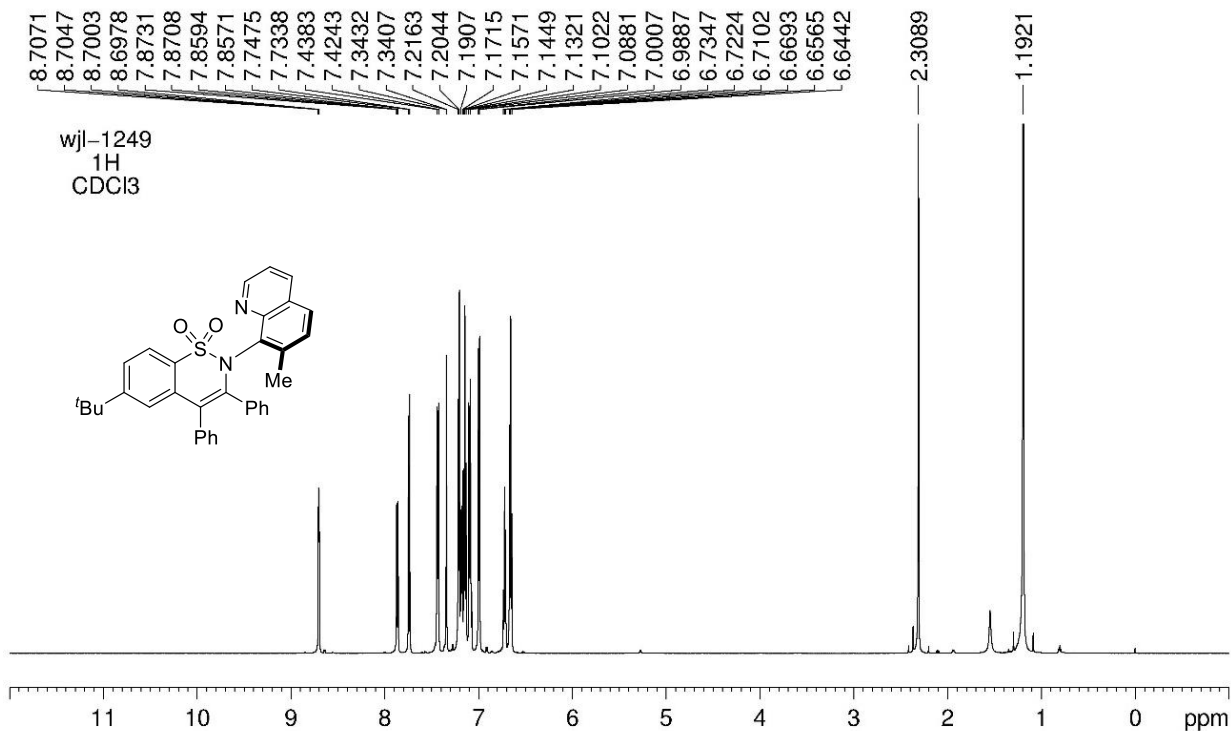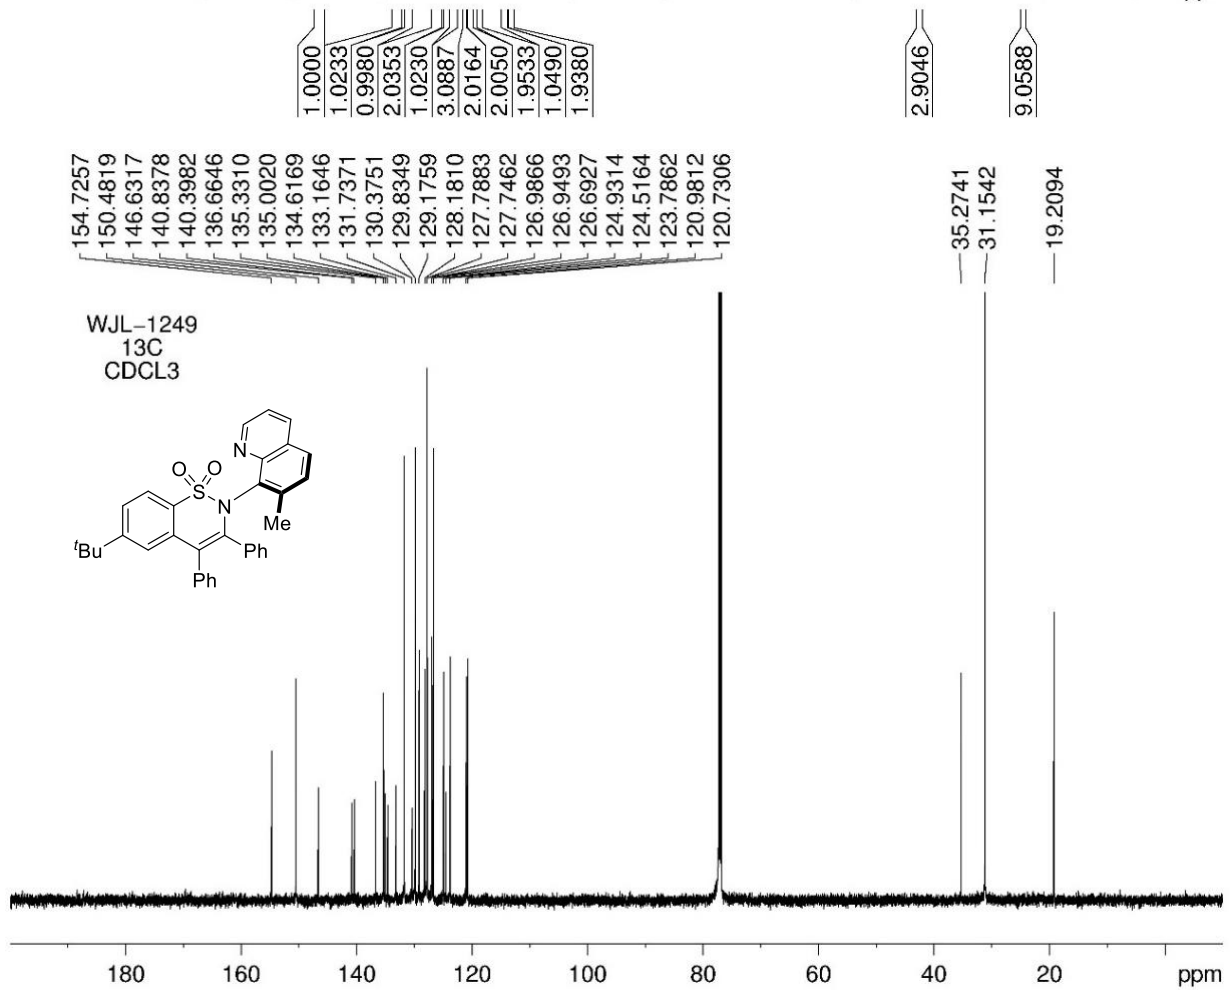



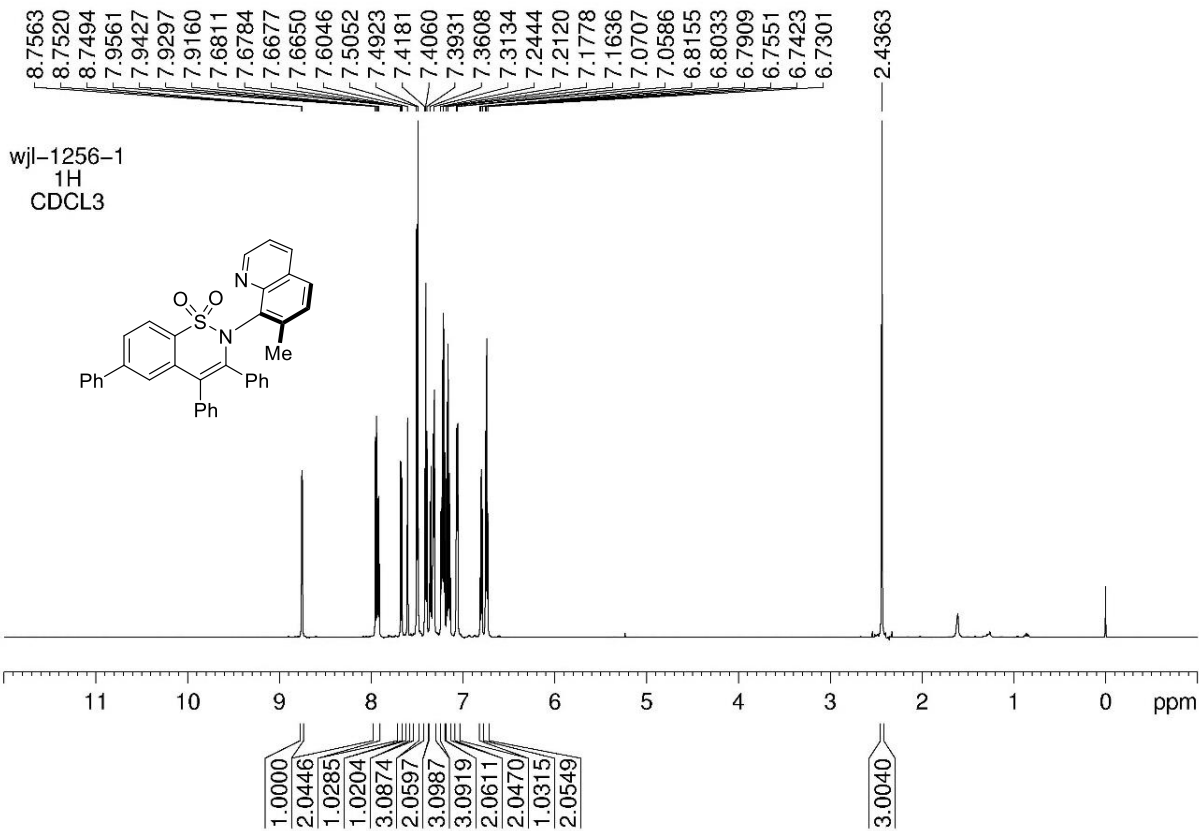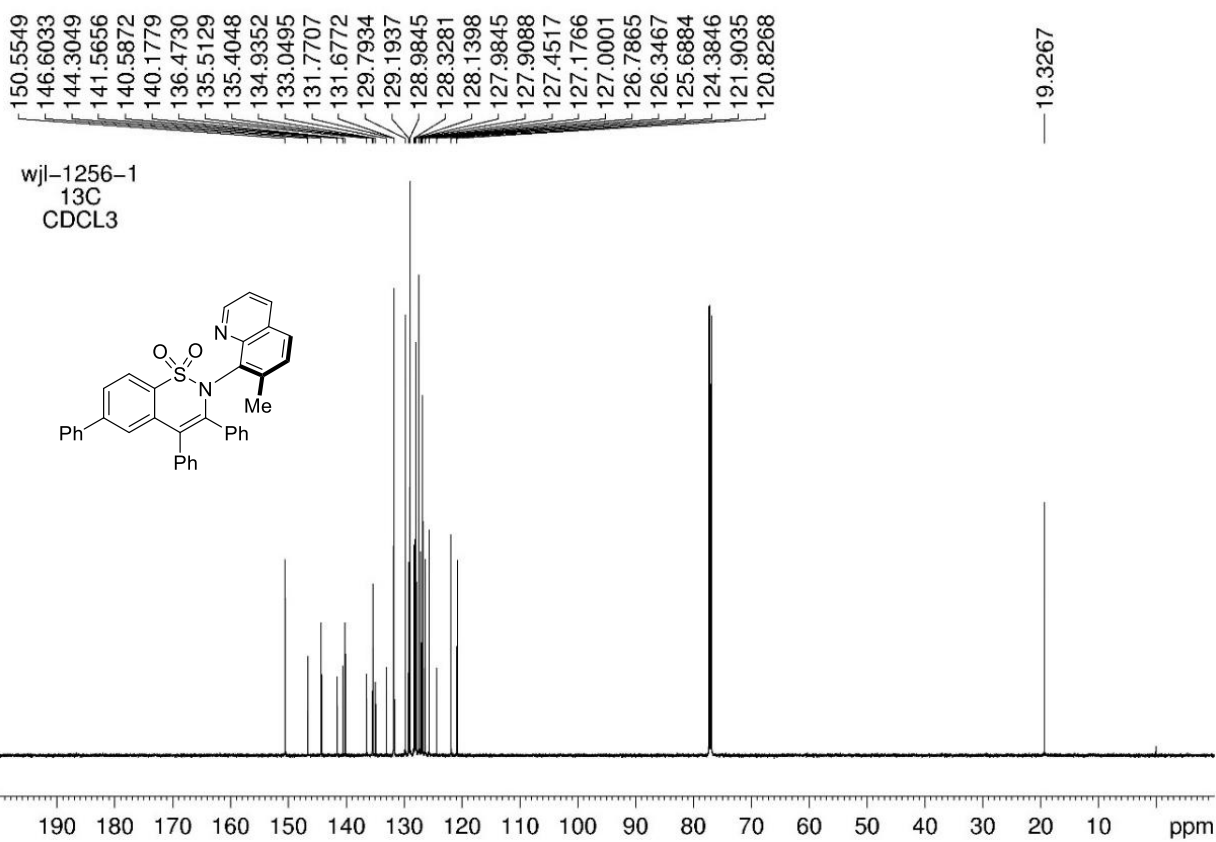

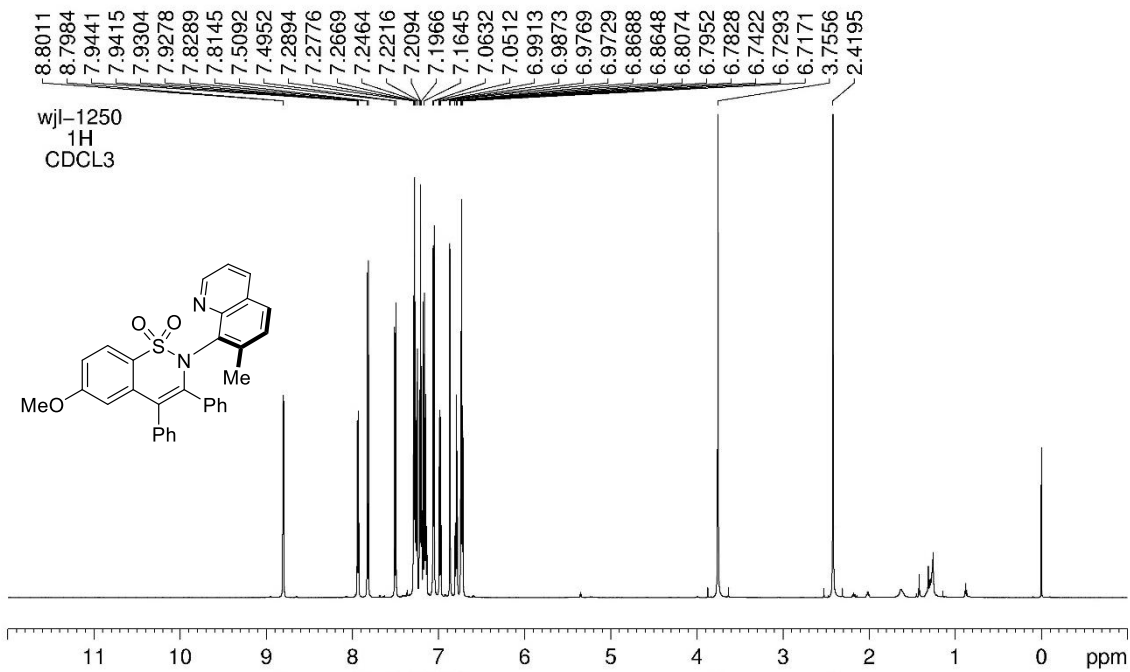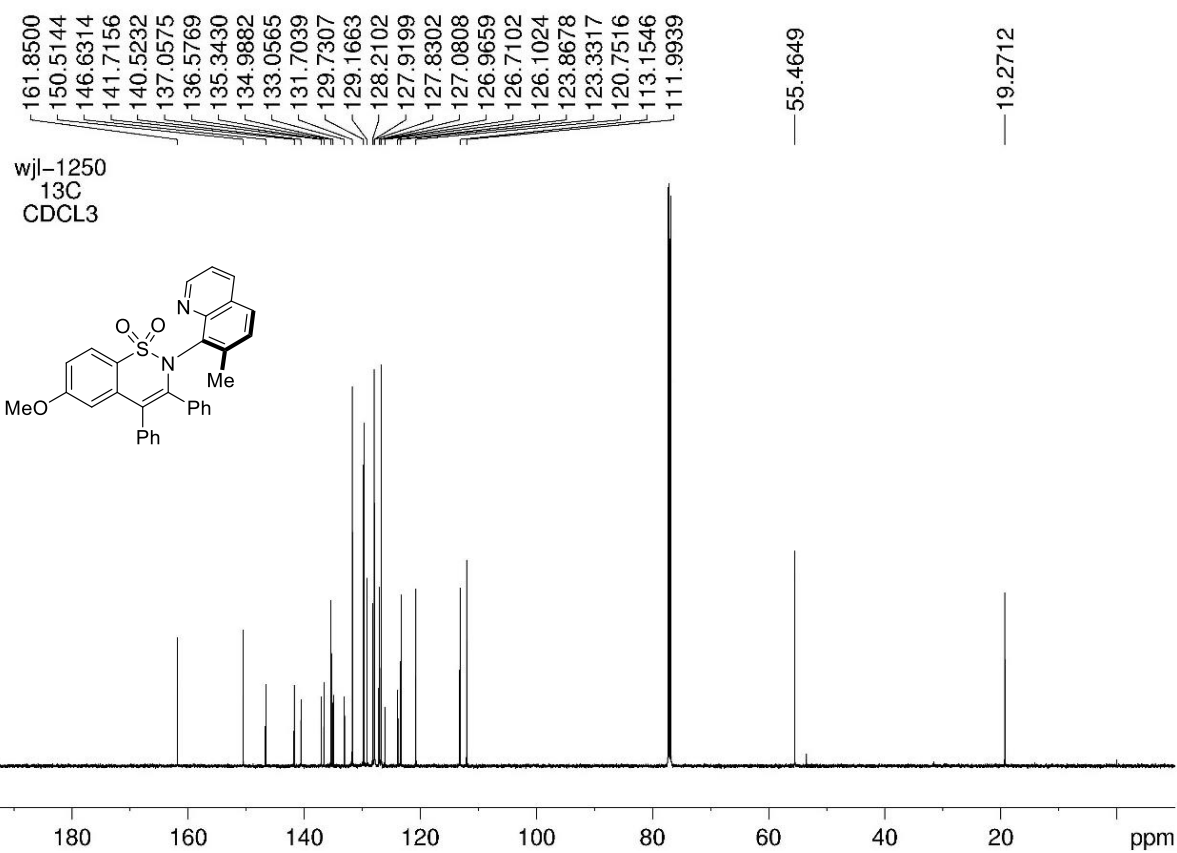

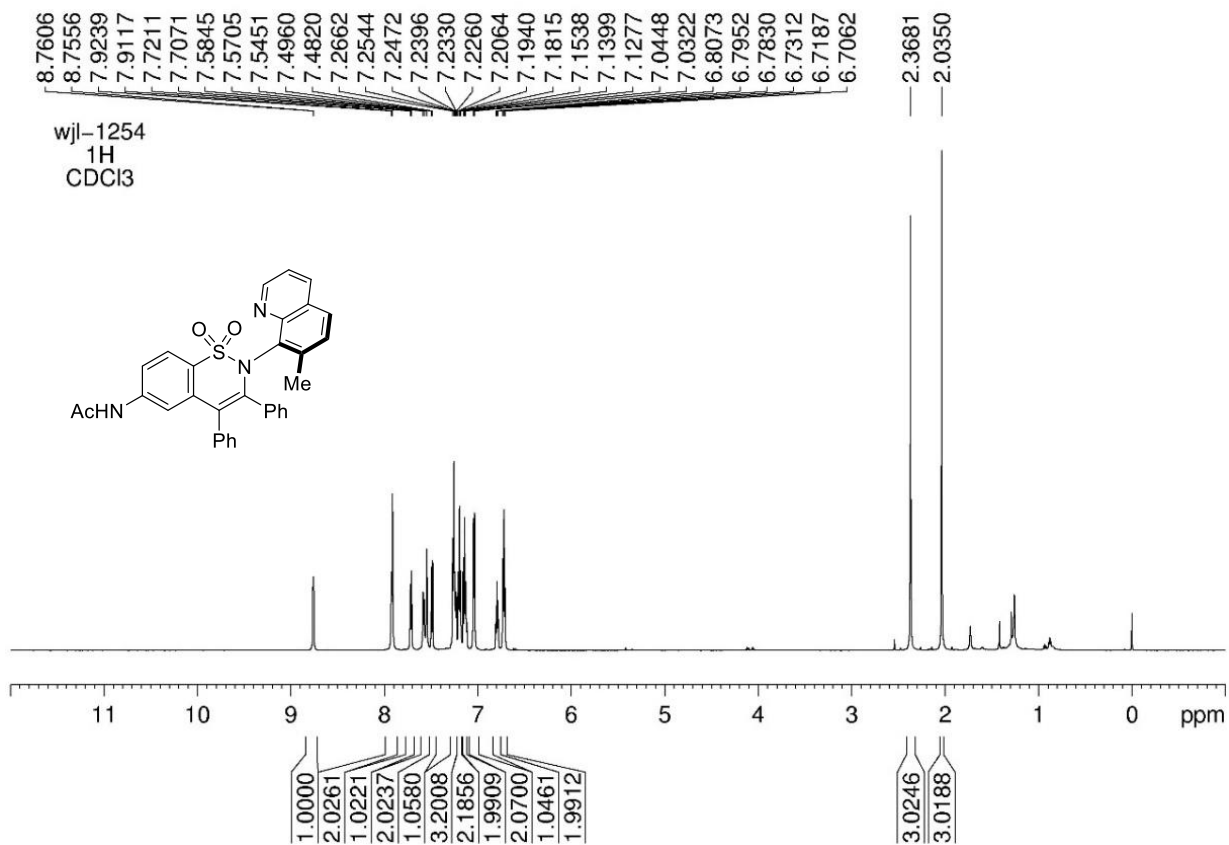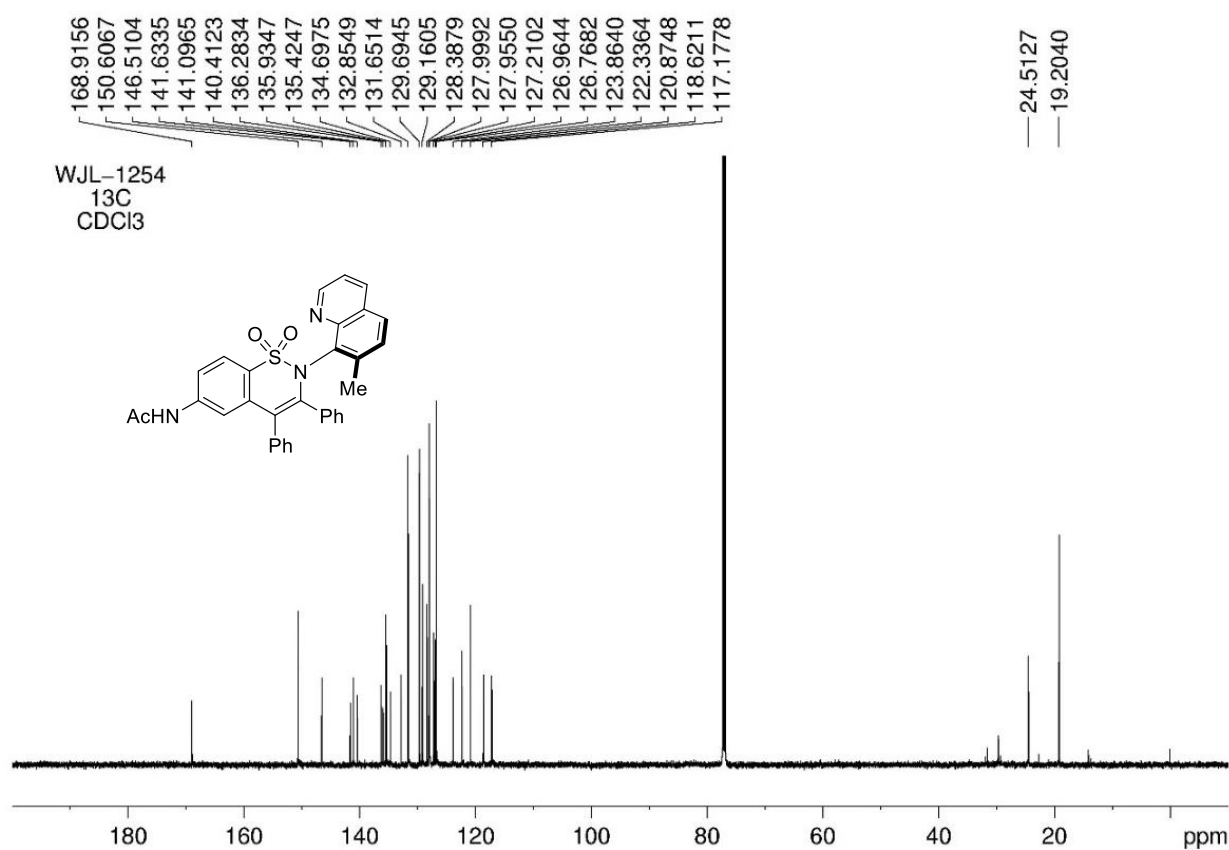

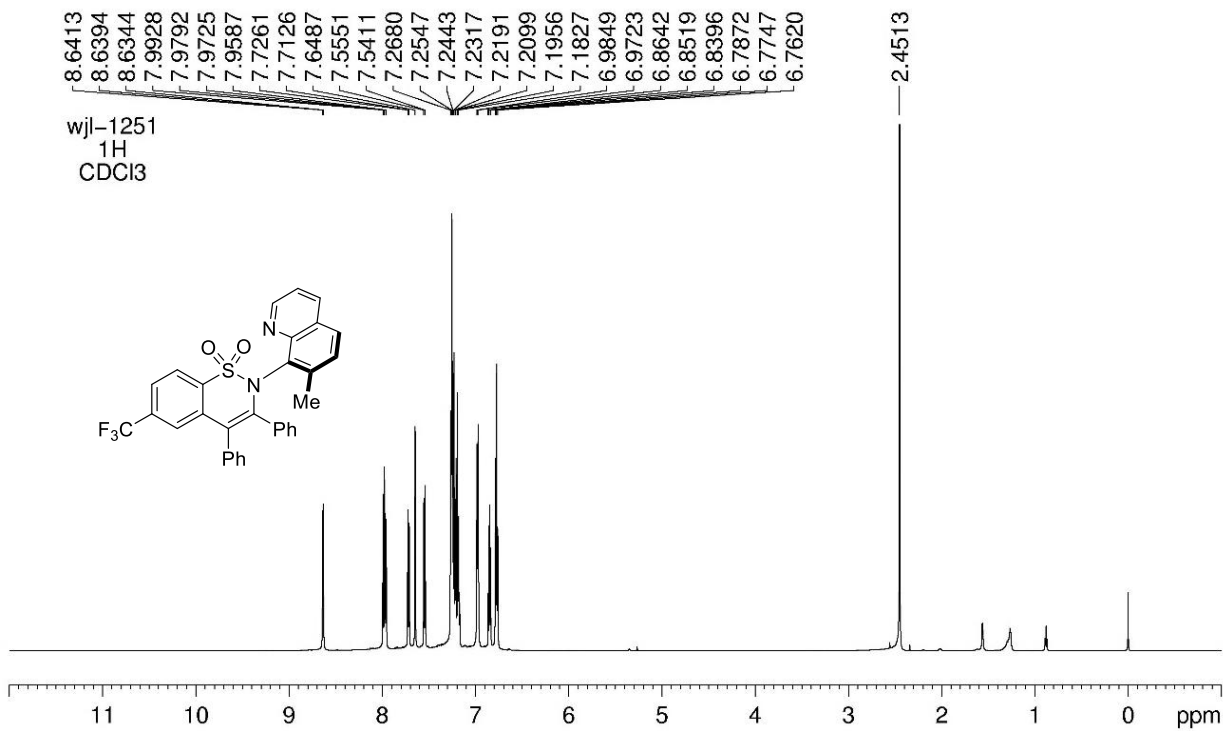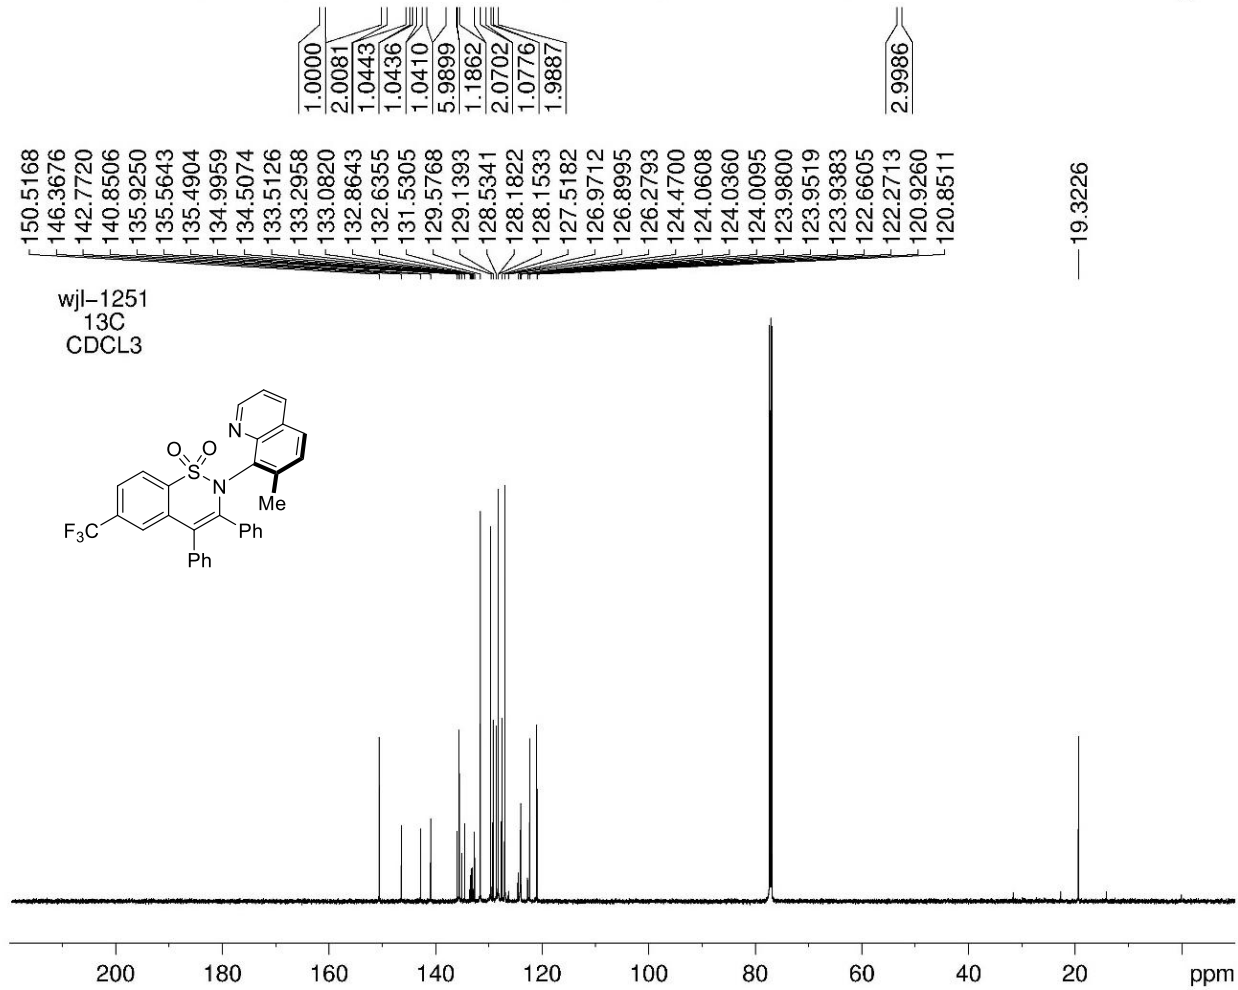

wjl-1251  
19F  
CDCl3

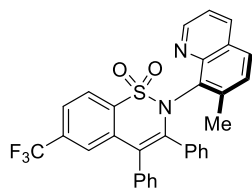

-62.6988

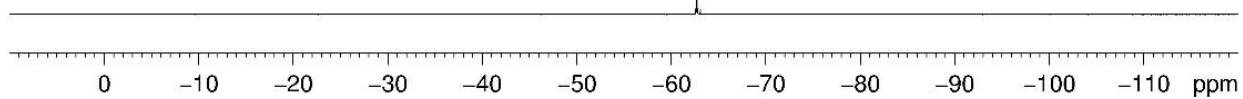

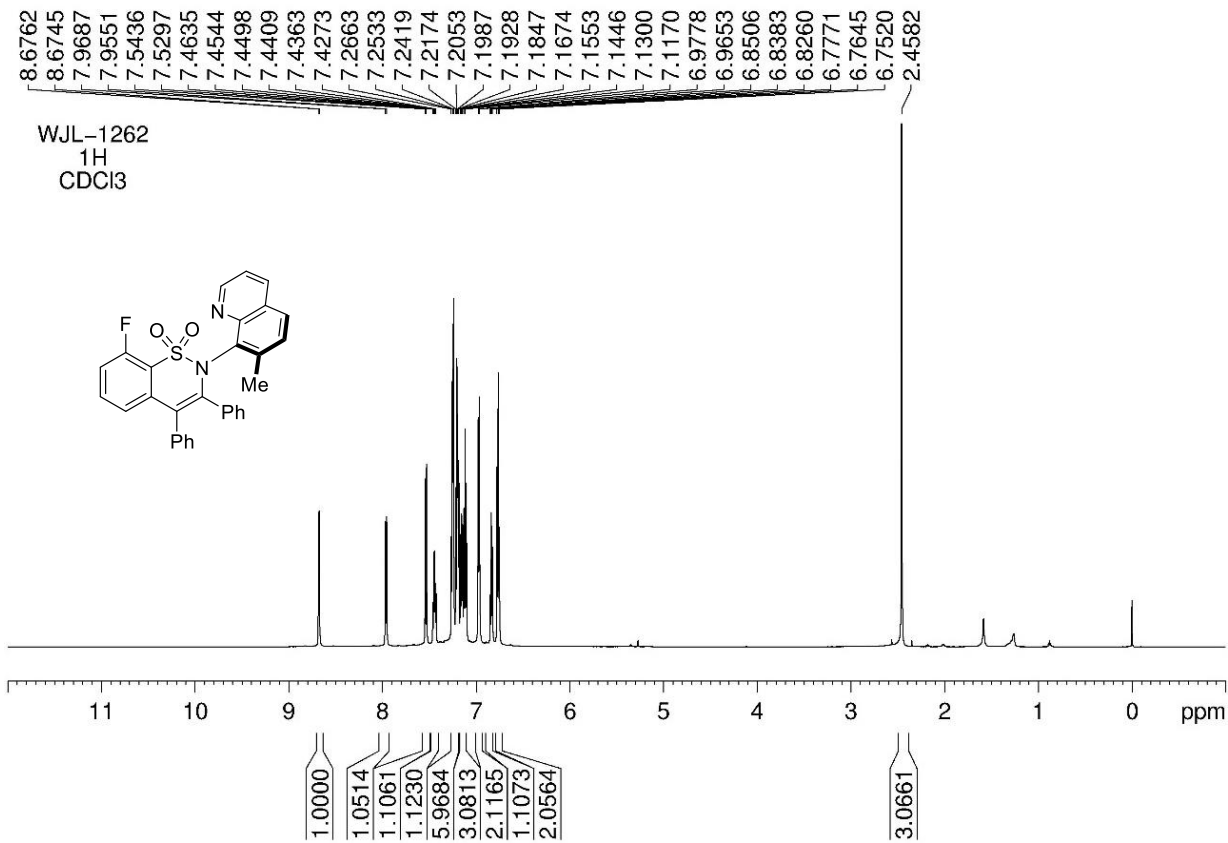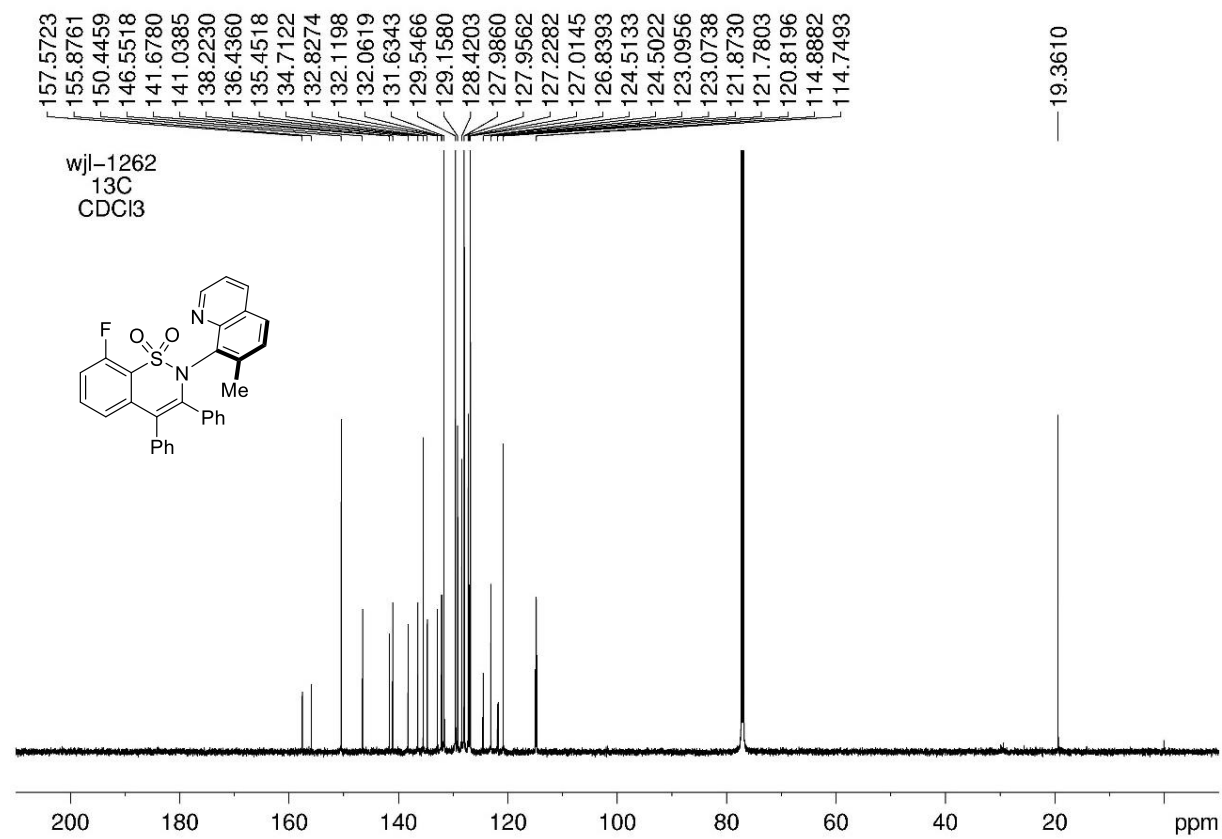

WJL-1262  
19F  
CDCl3

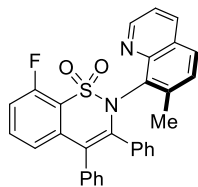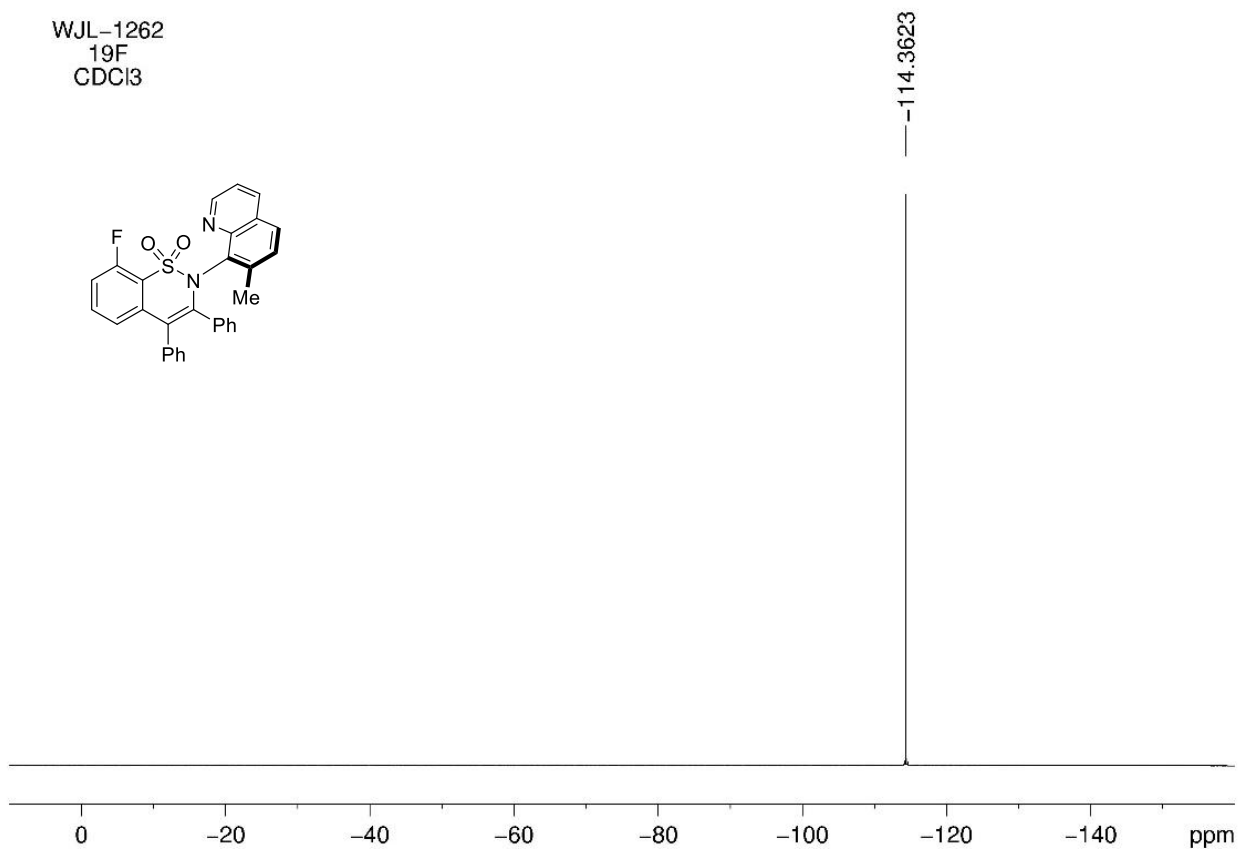

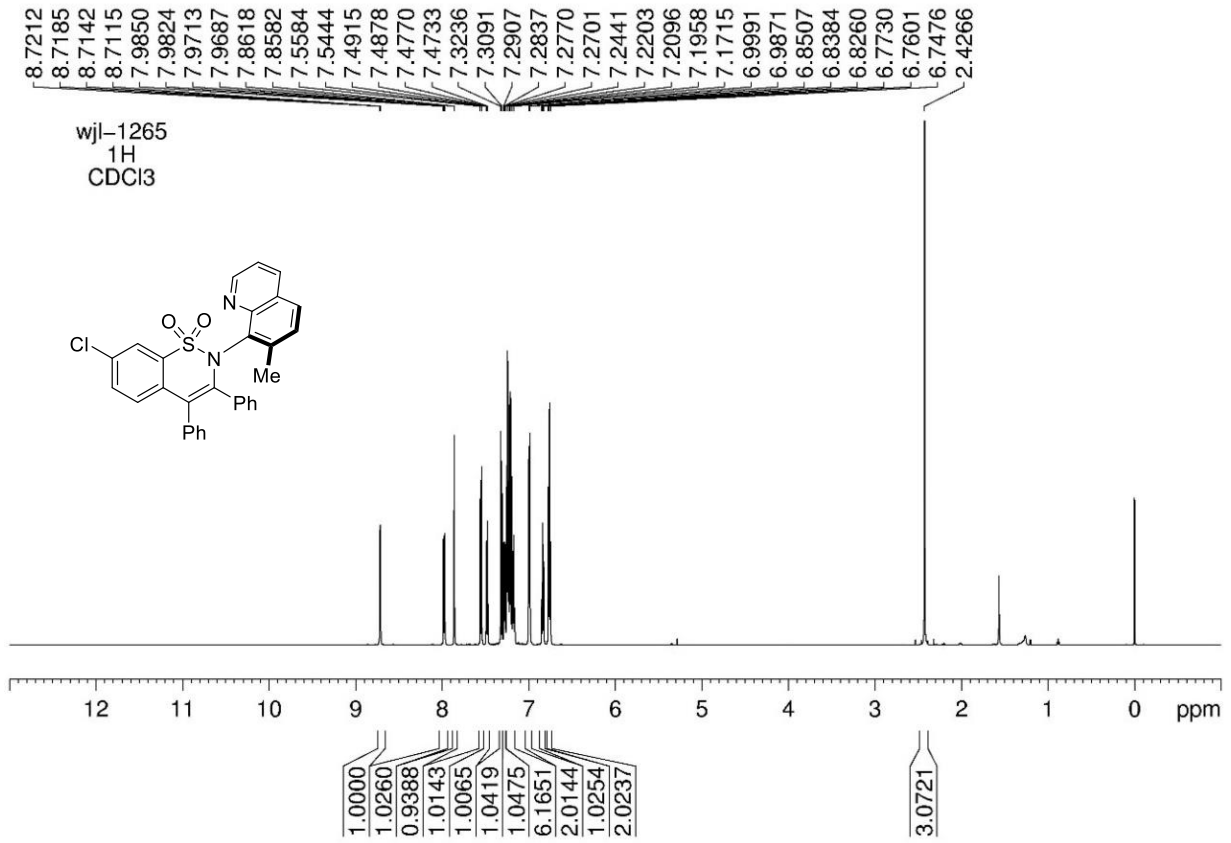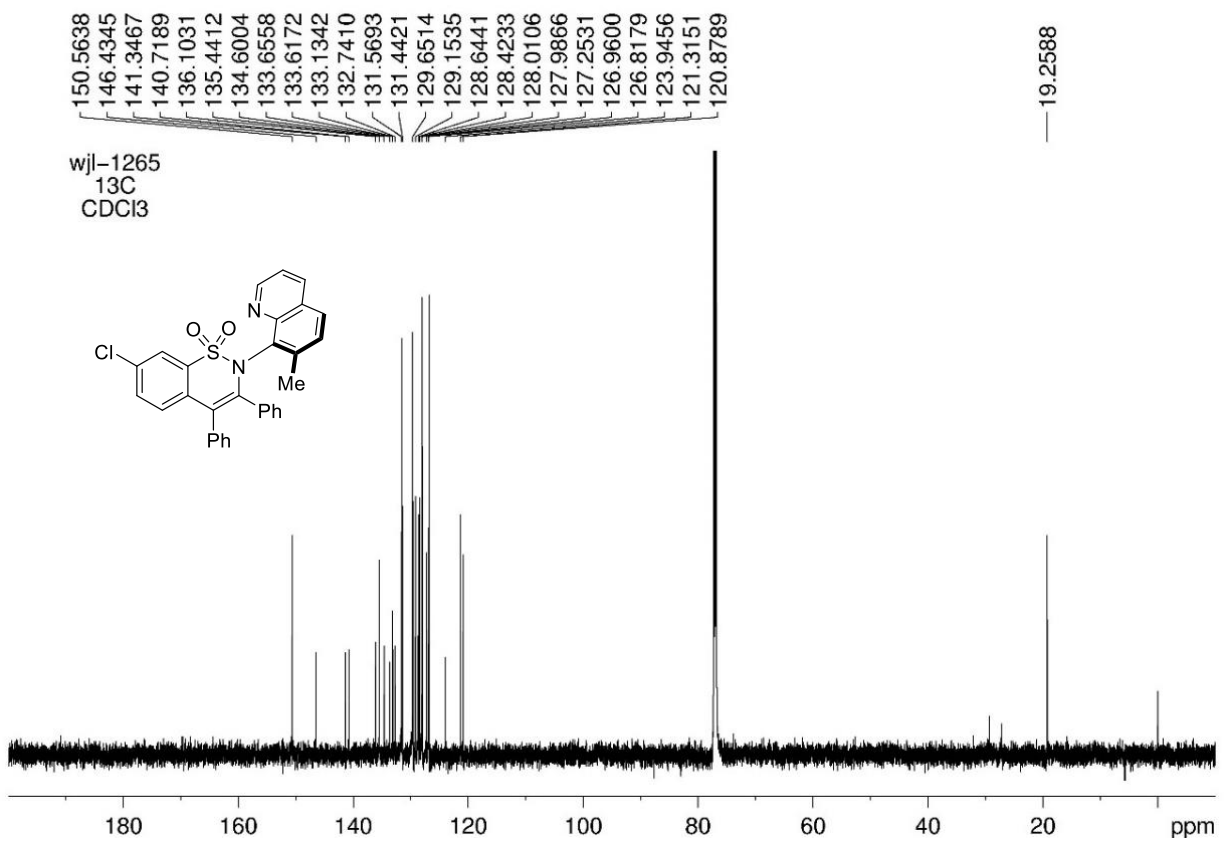



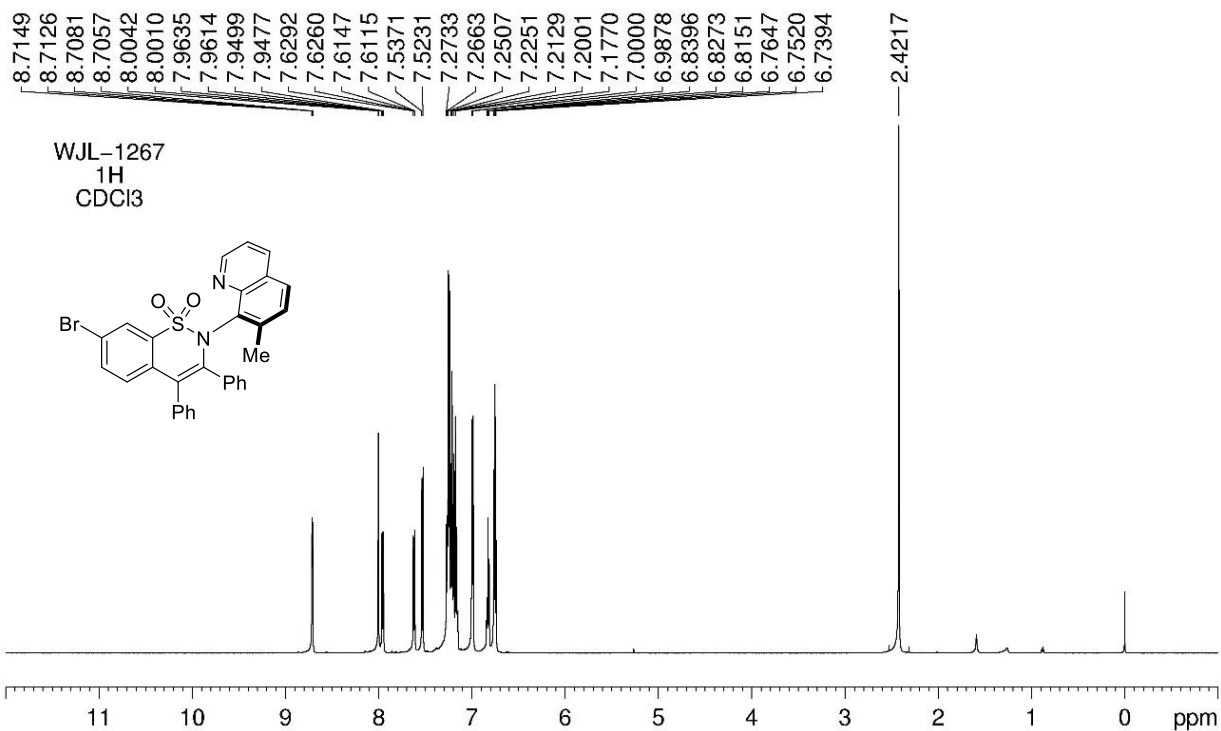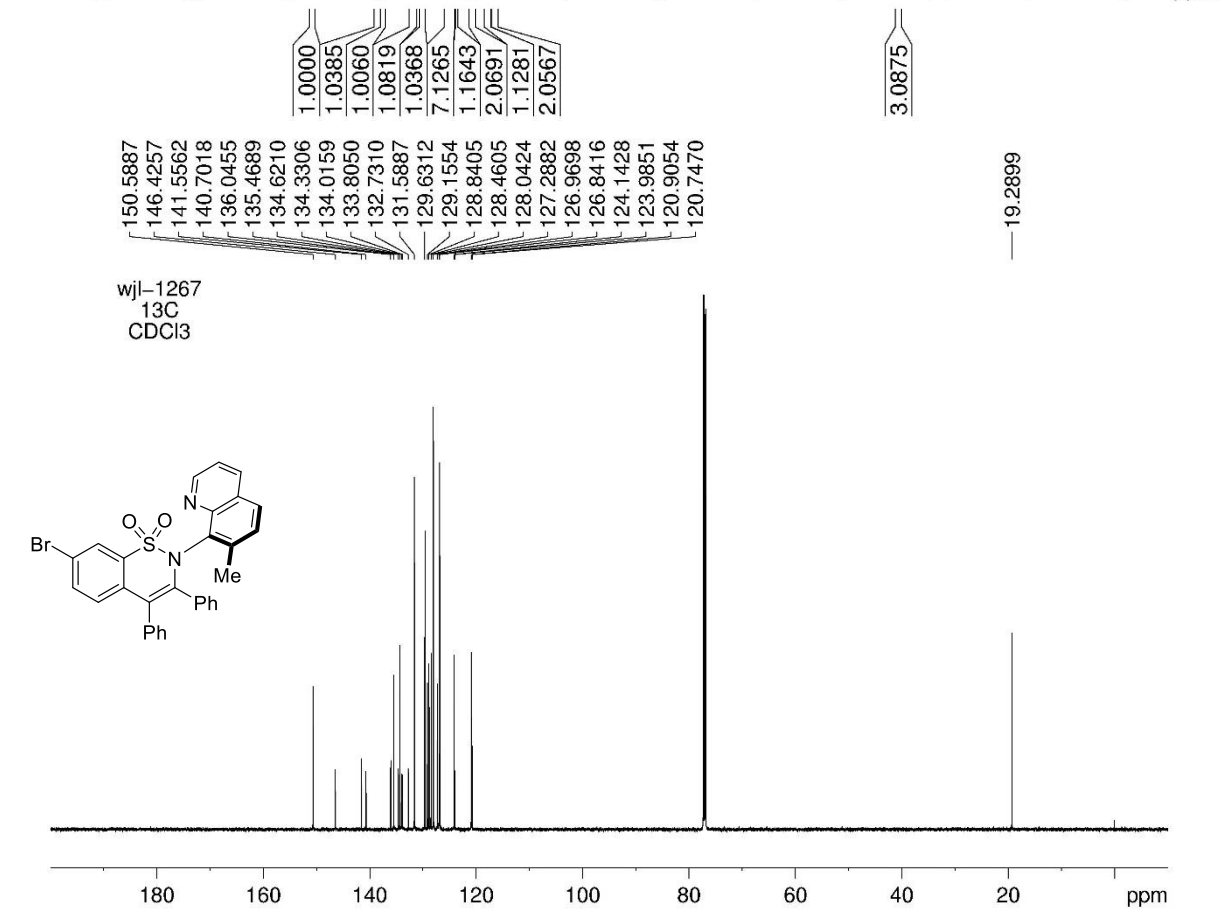

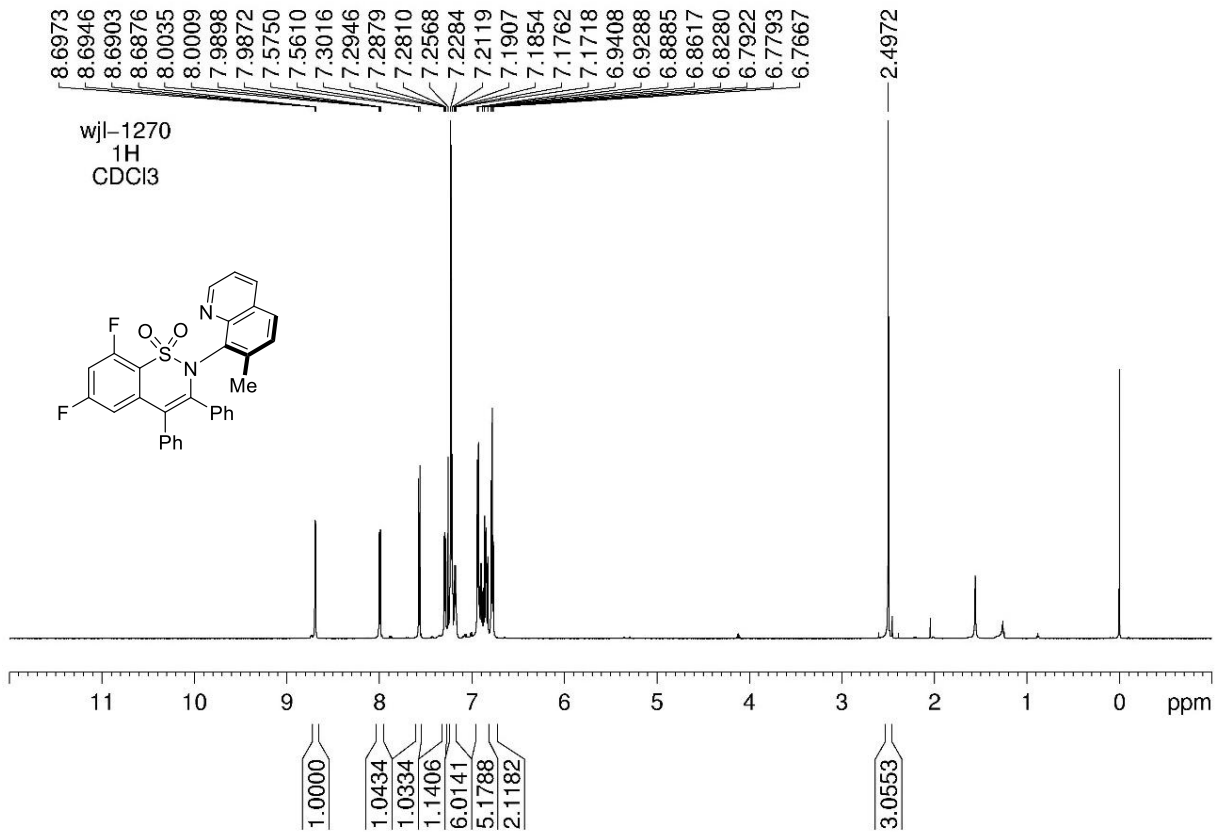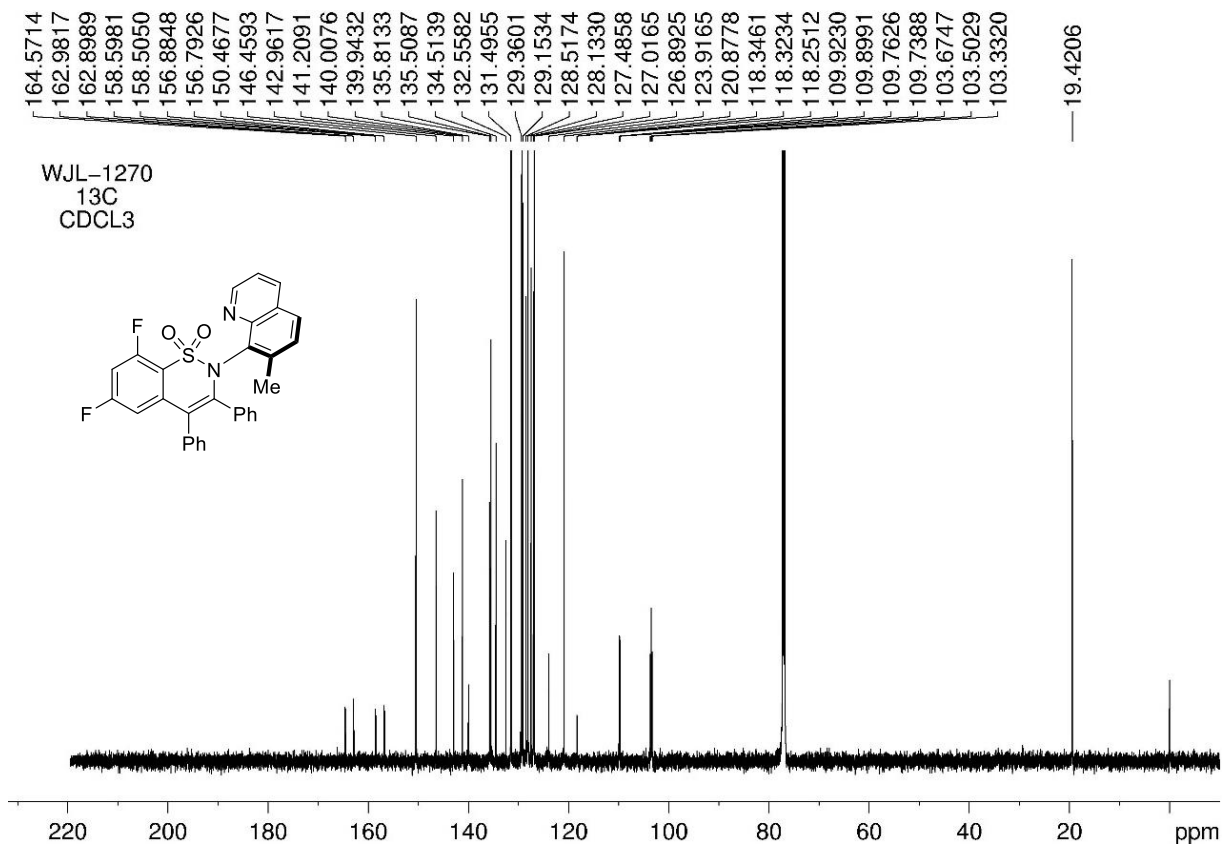

wjl-1270  
19F  
CDCl3

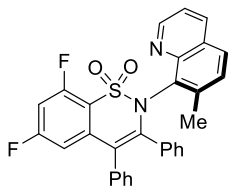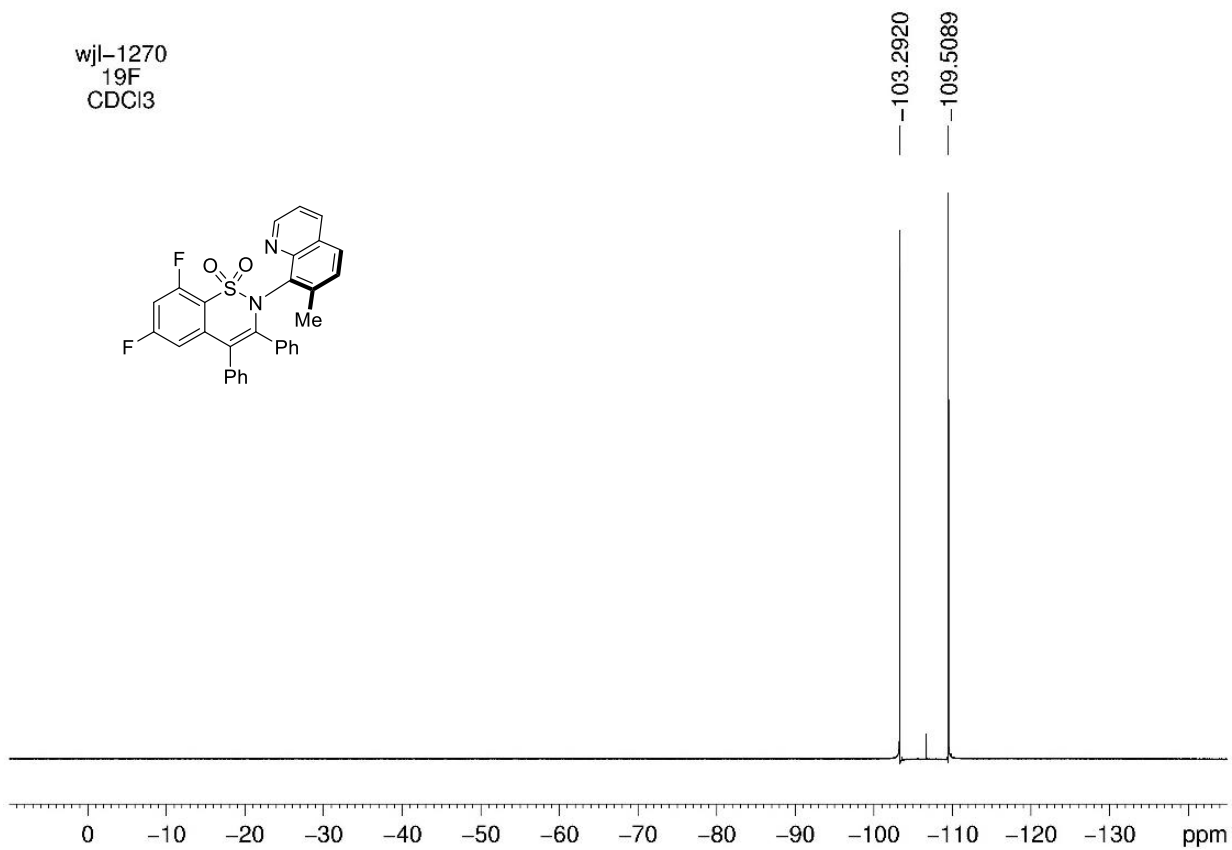

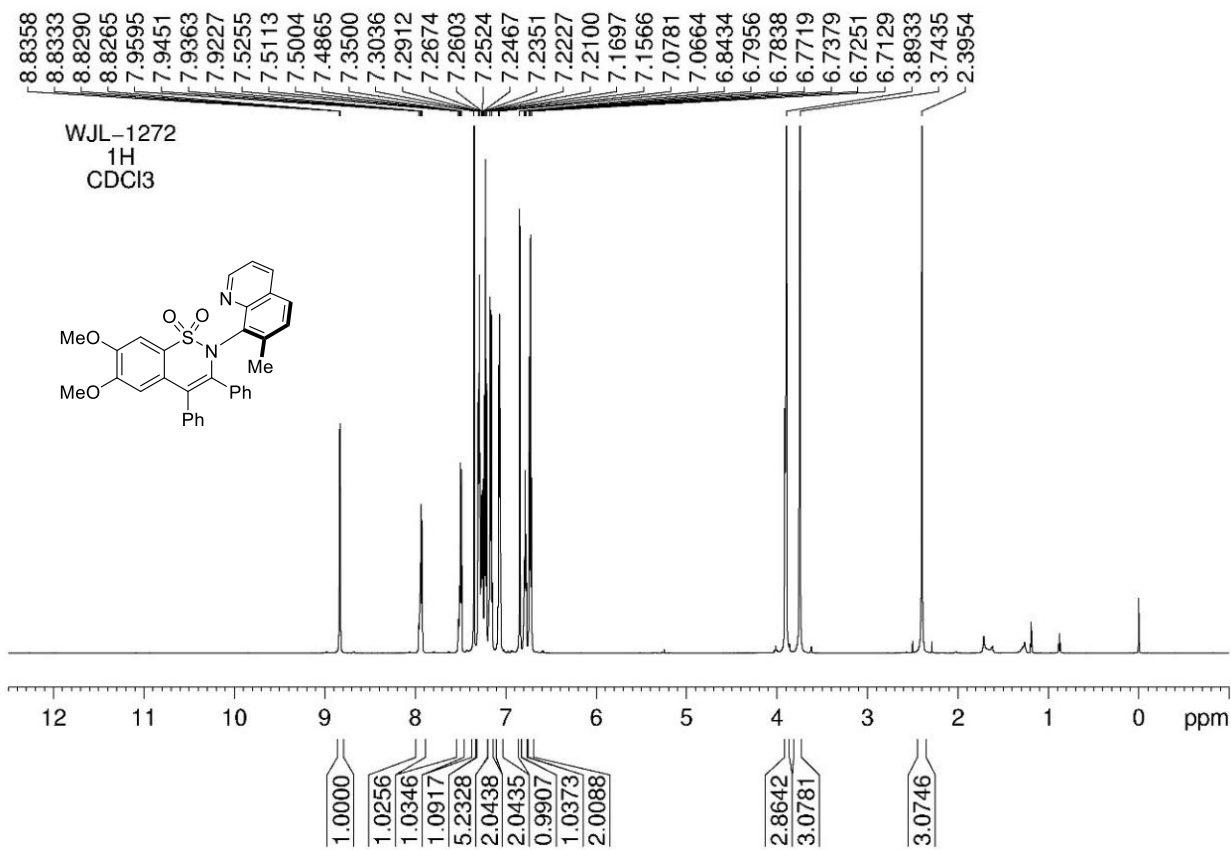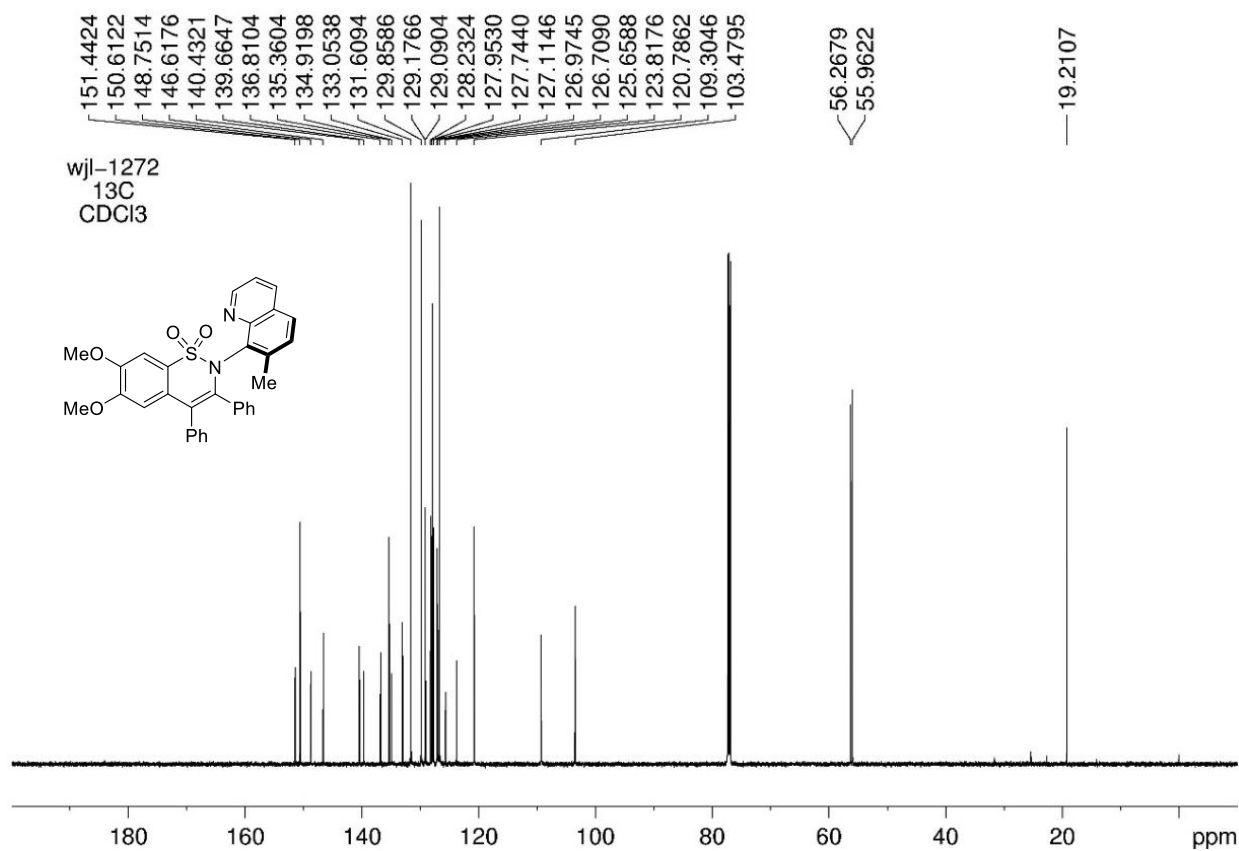

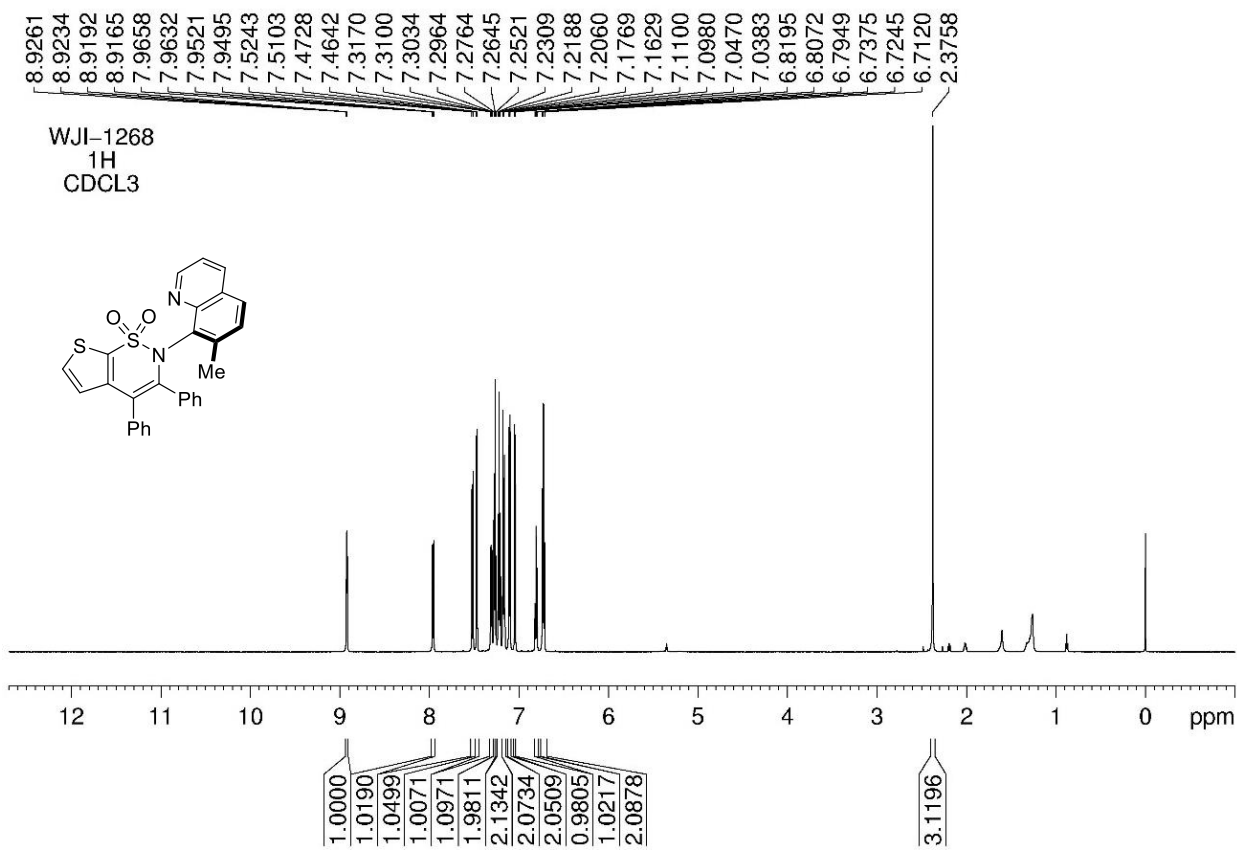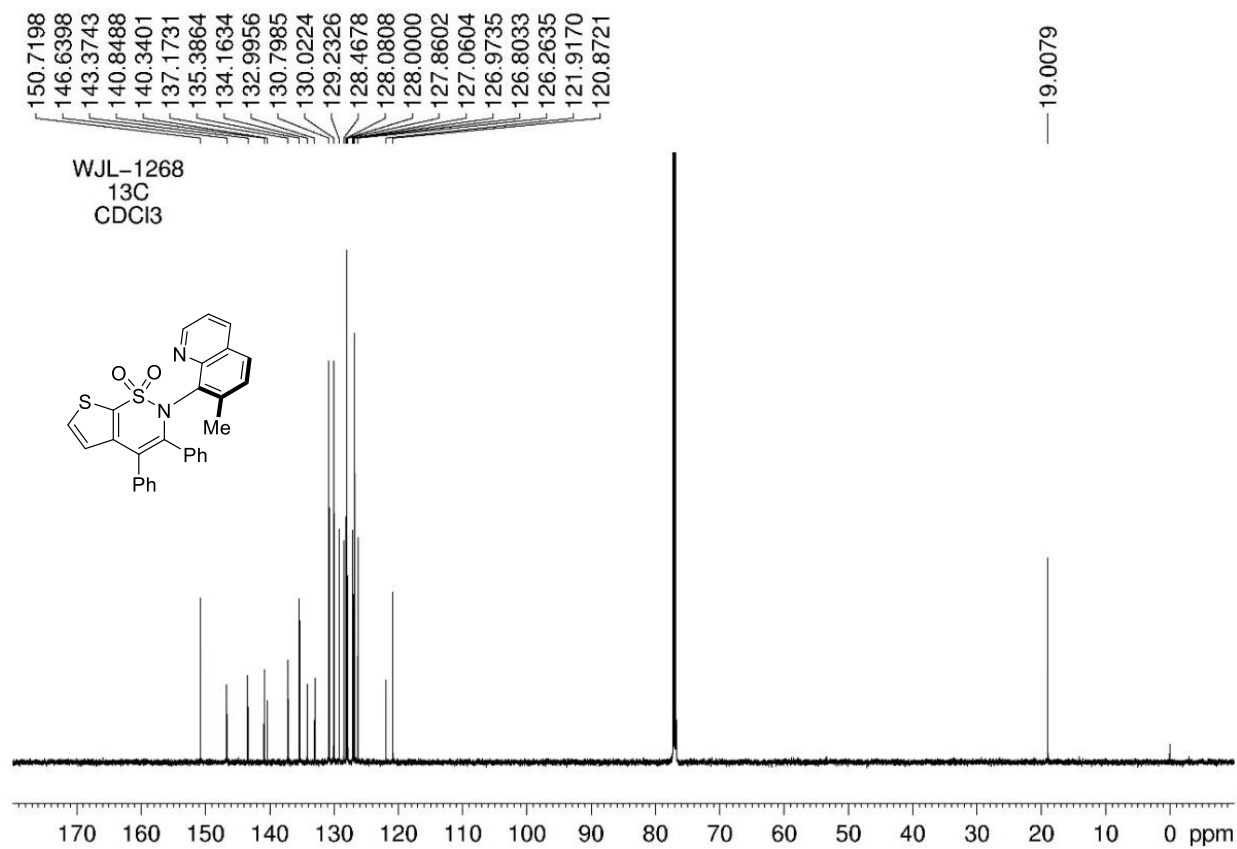

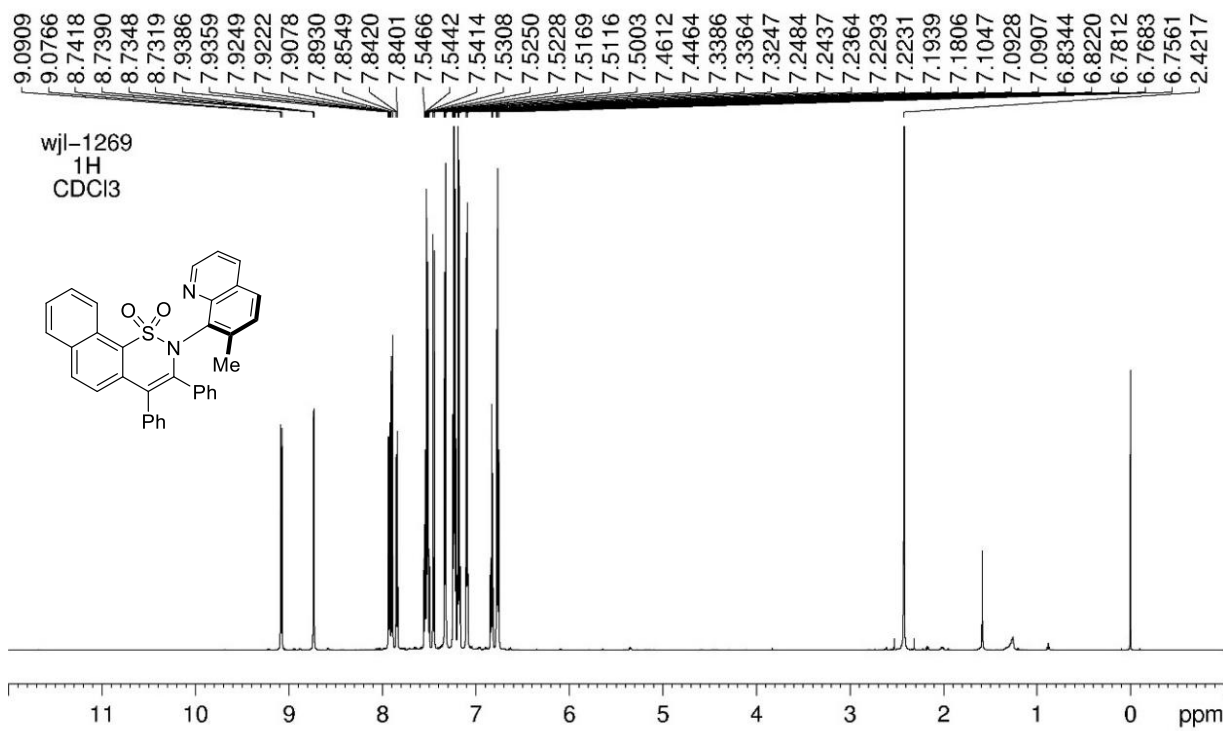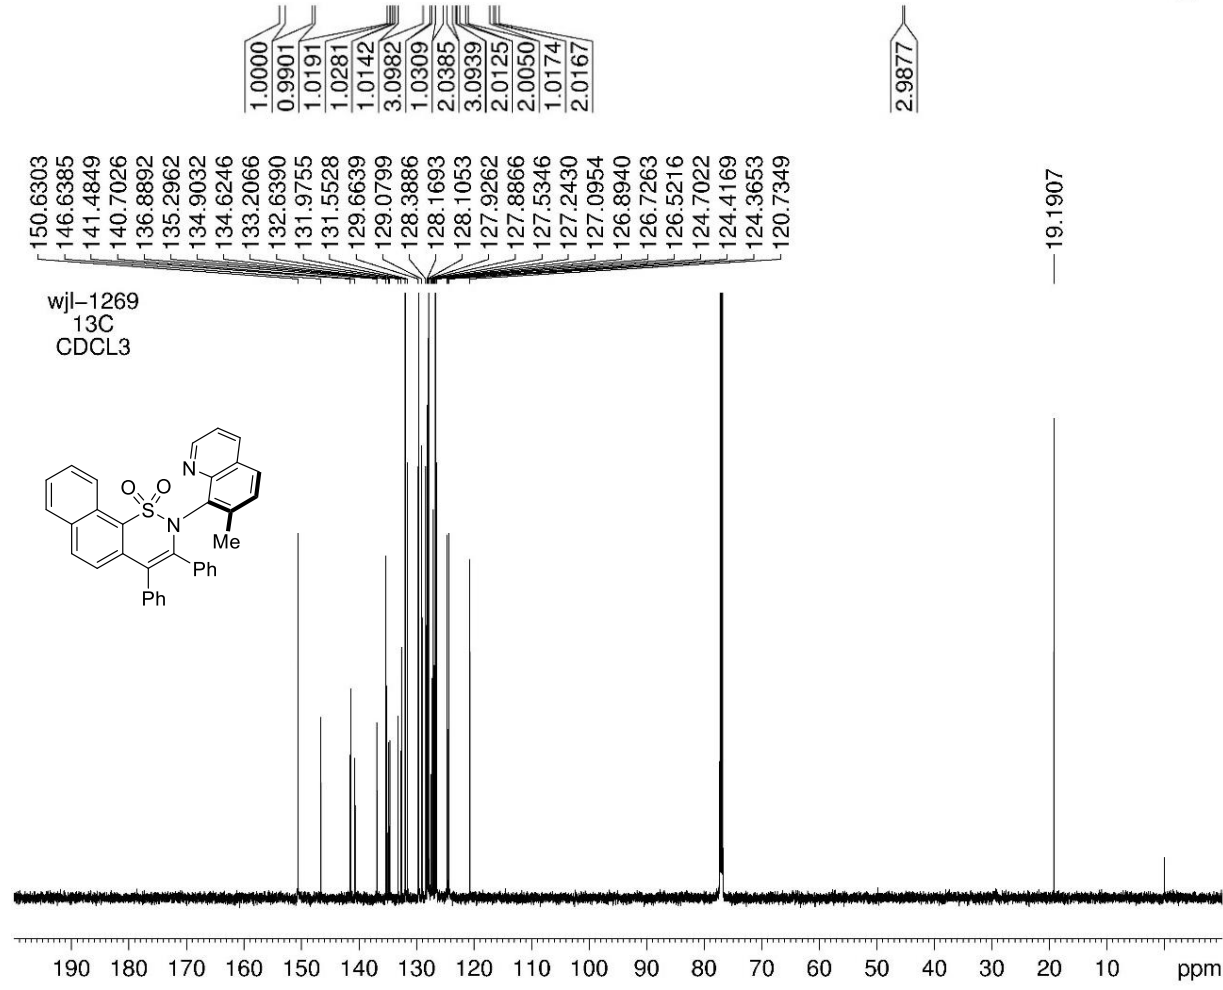

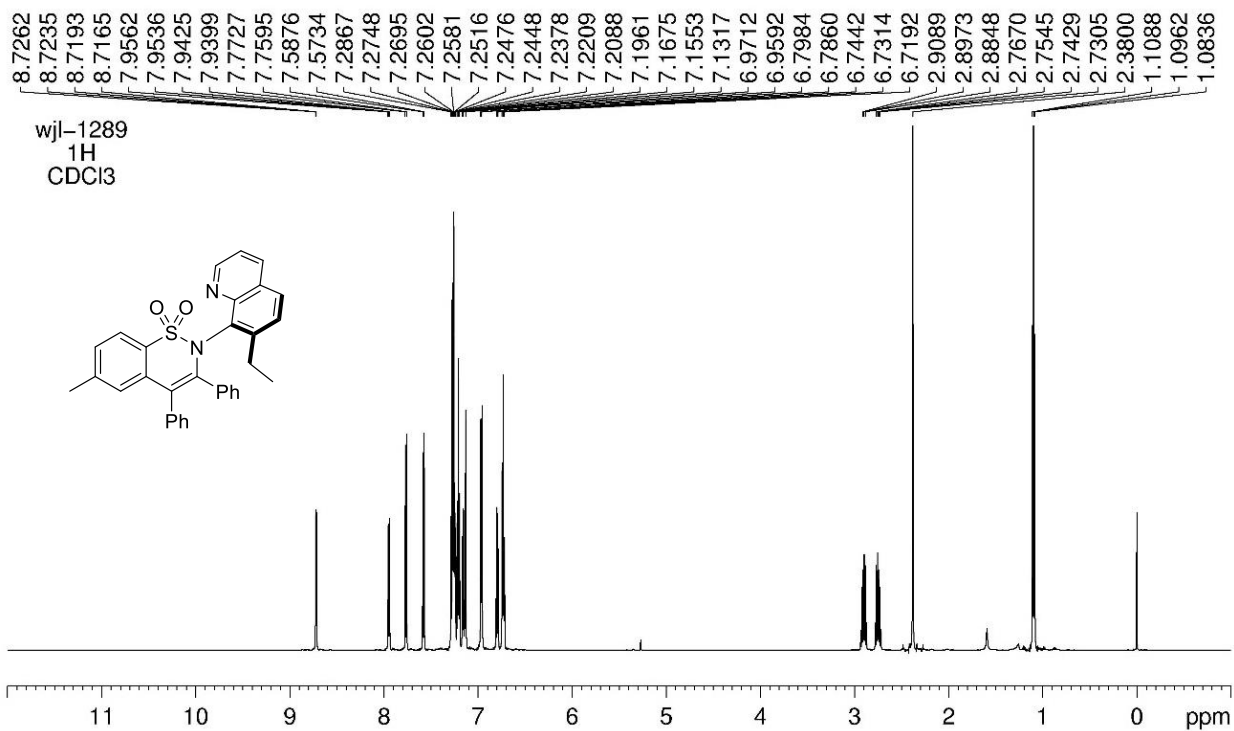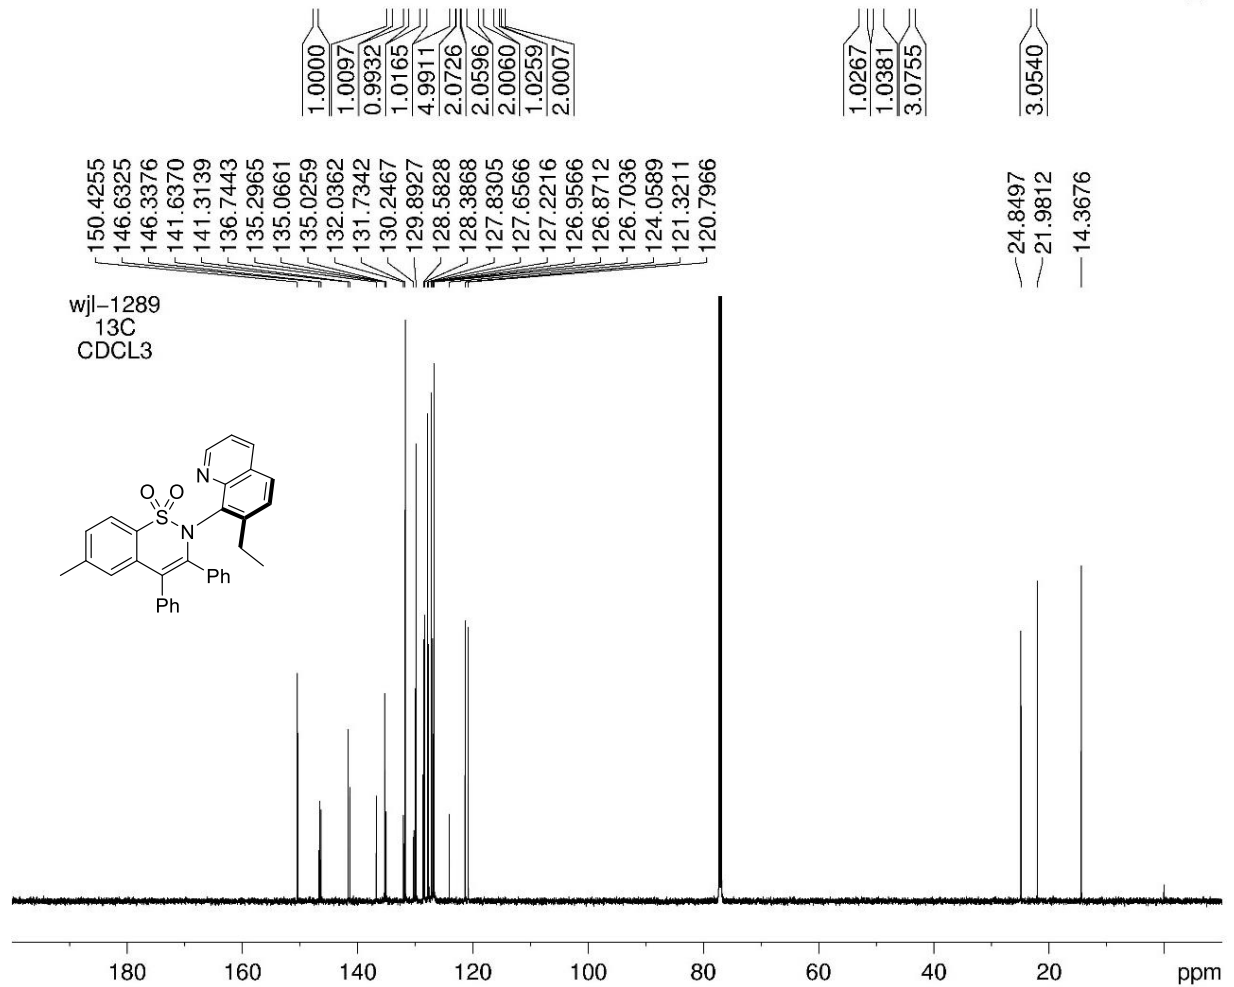

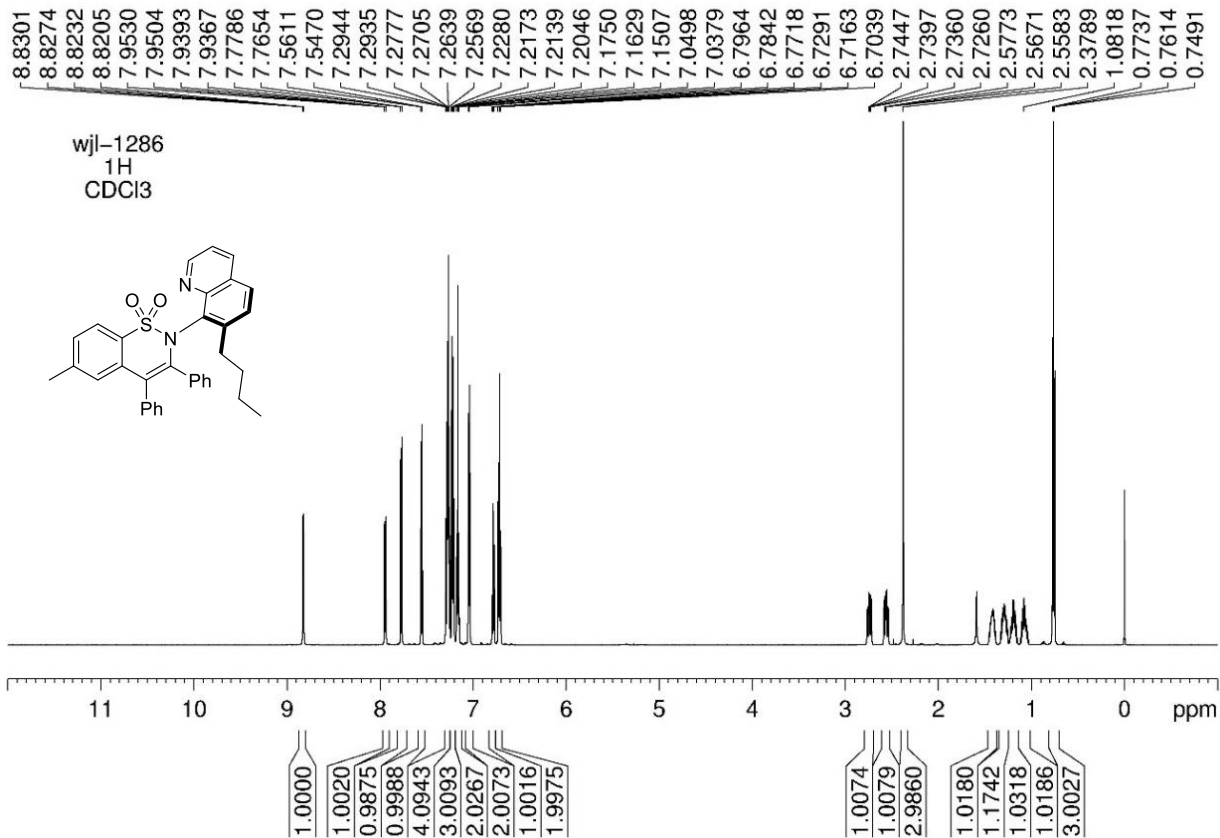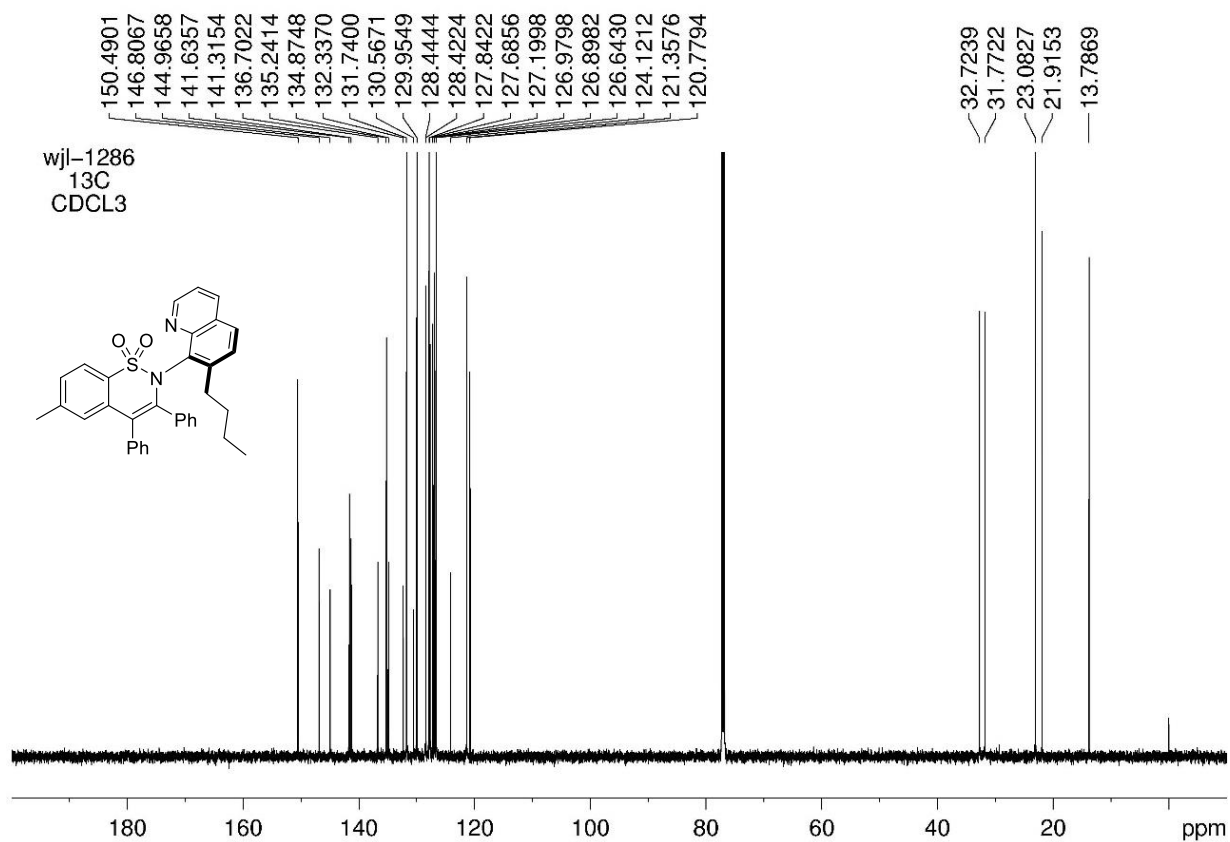



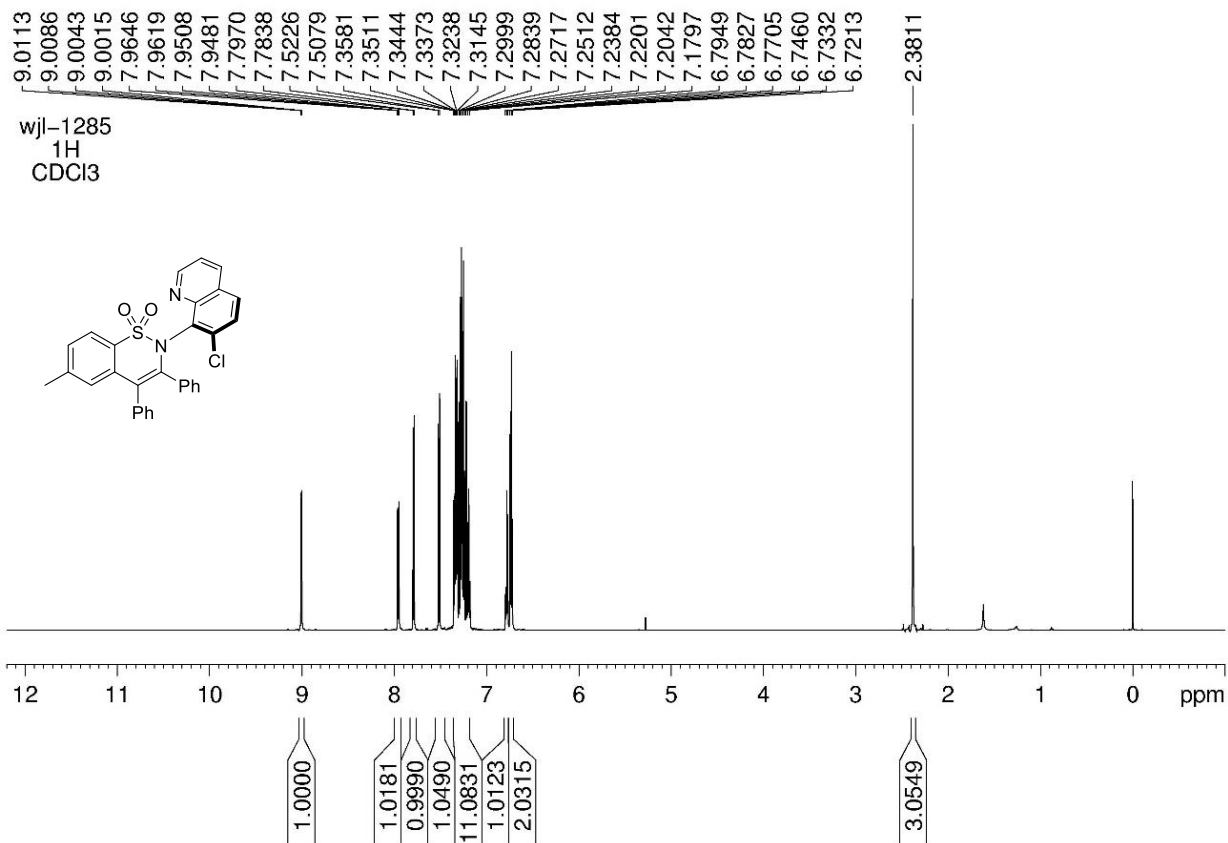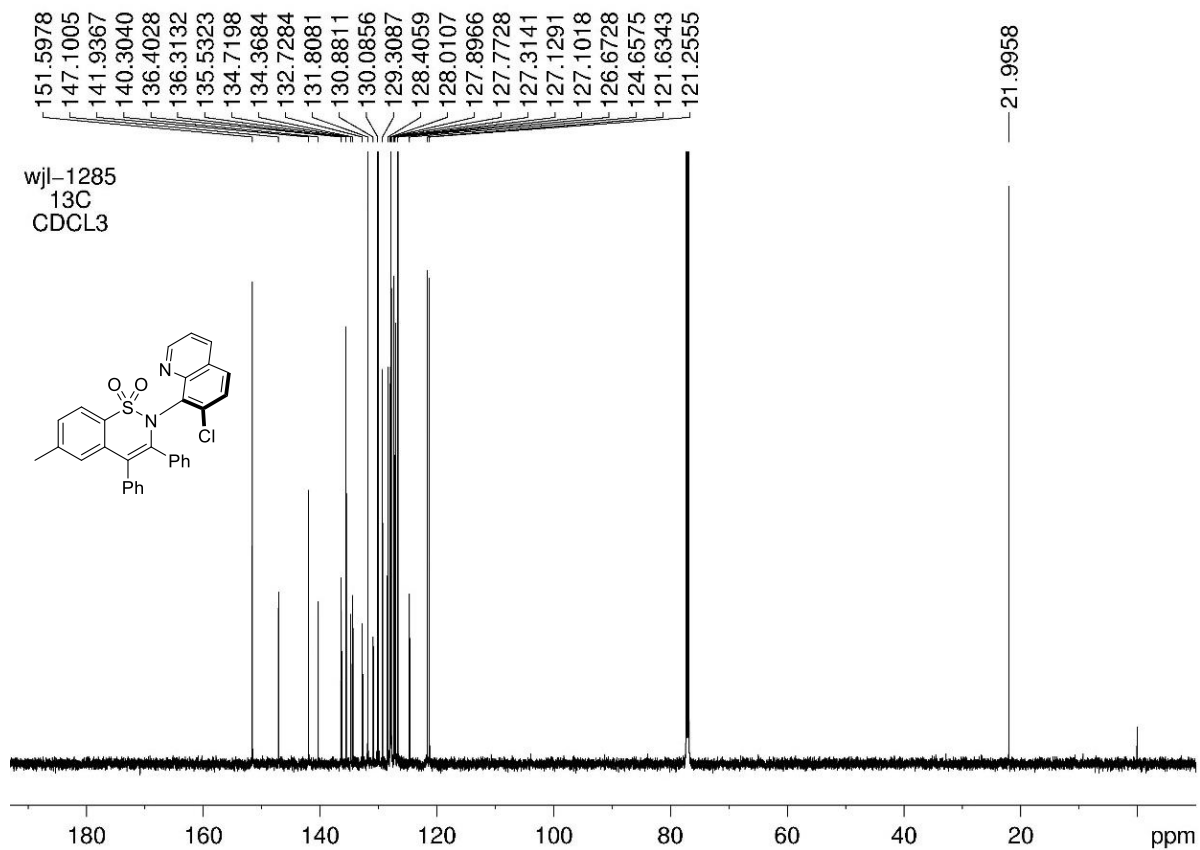

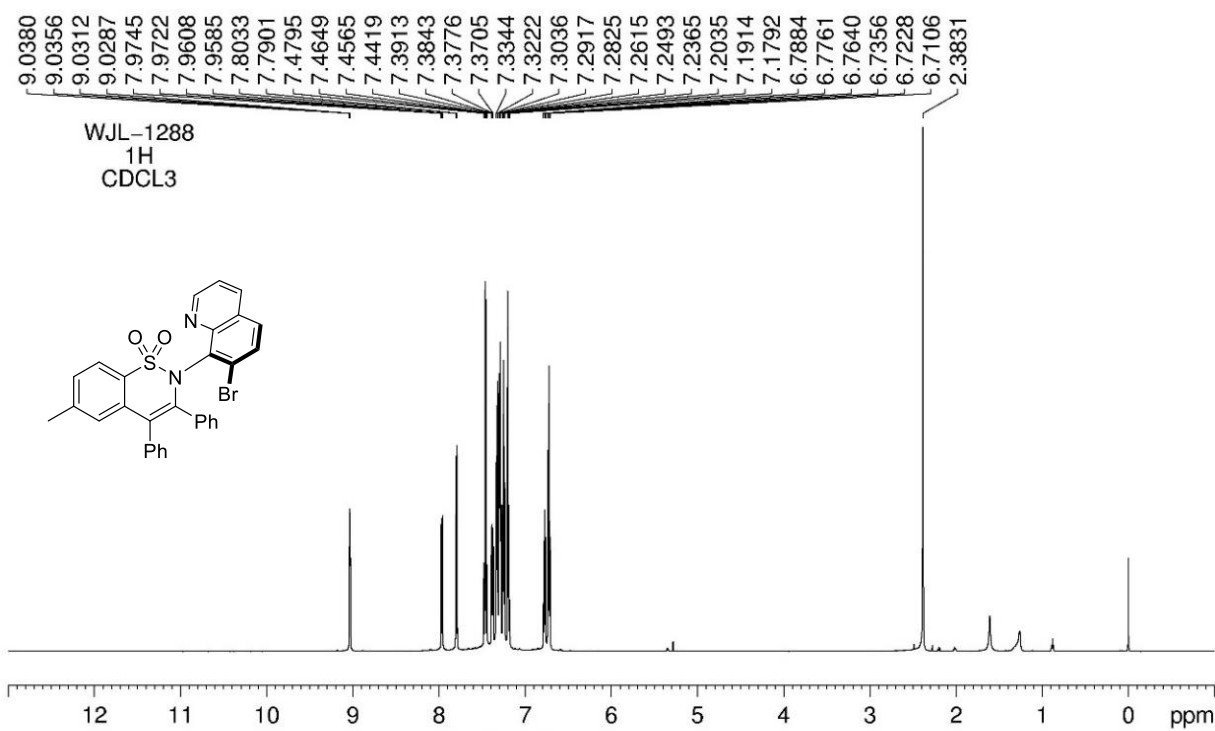

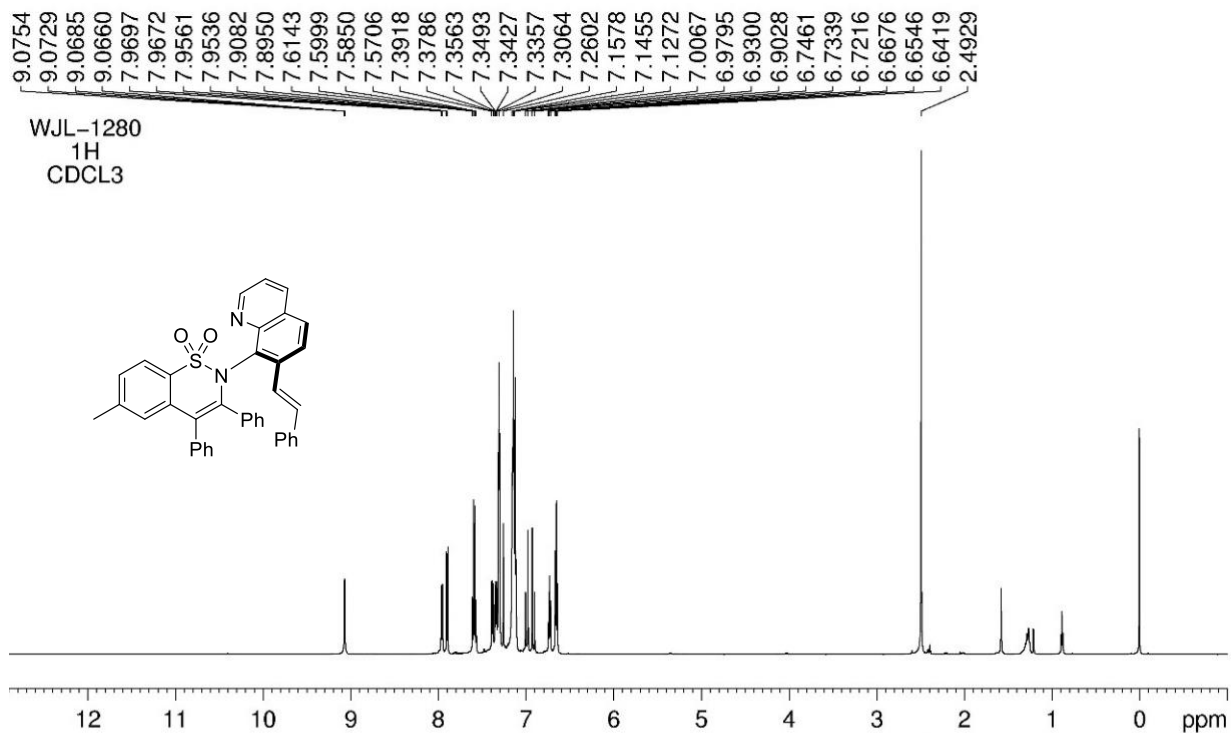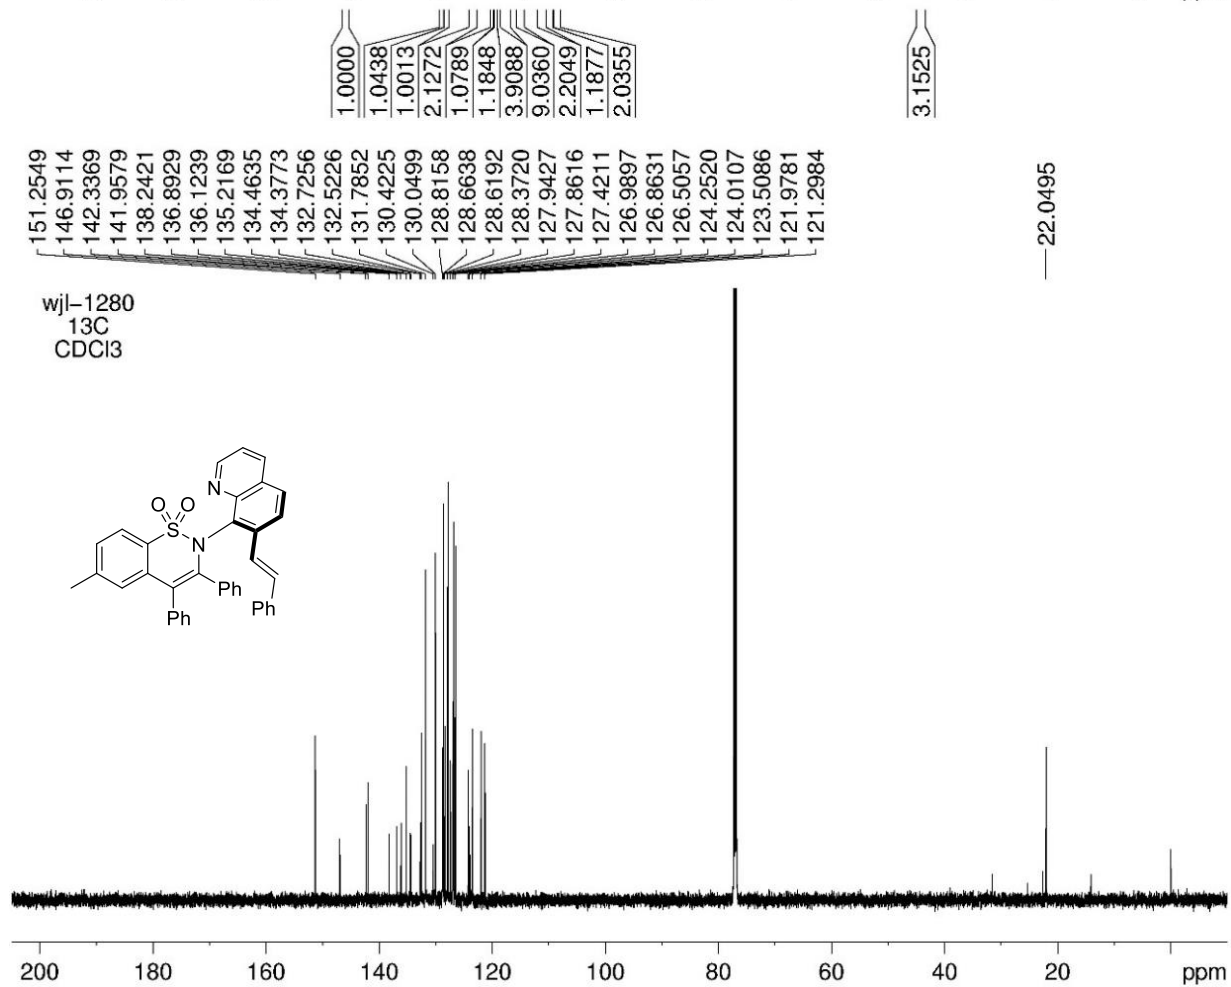

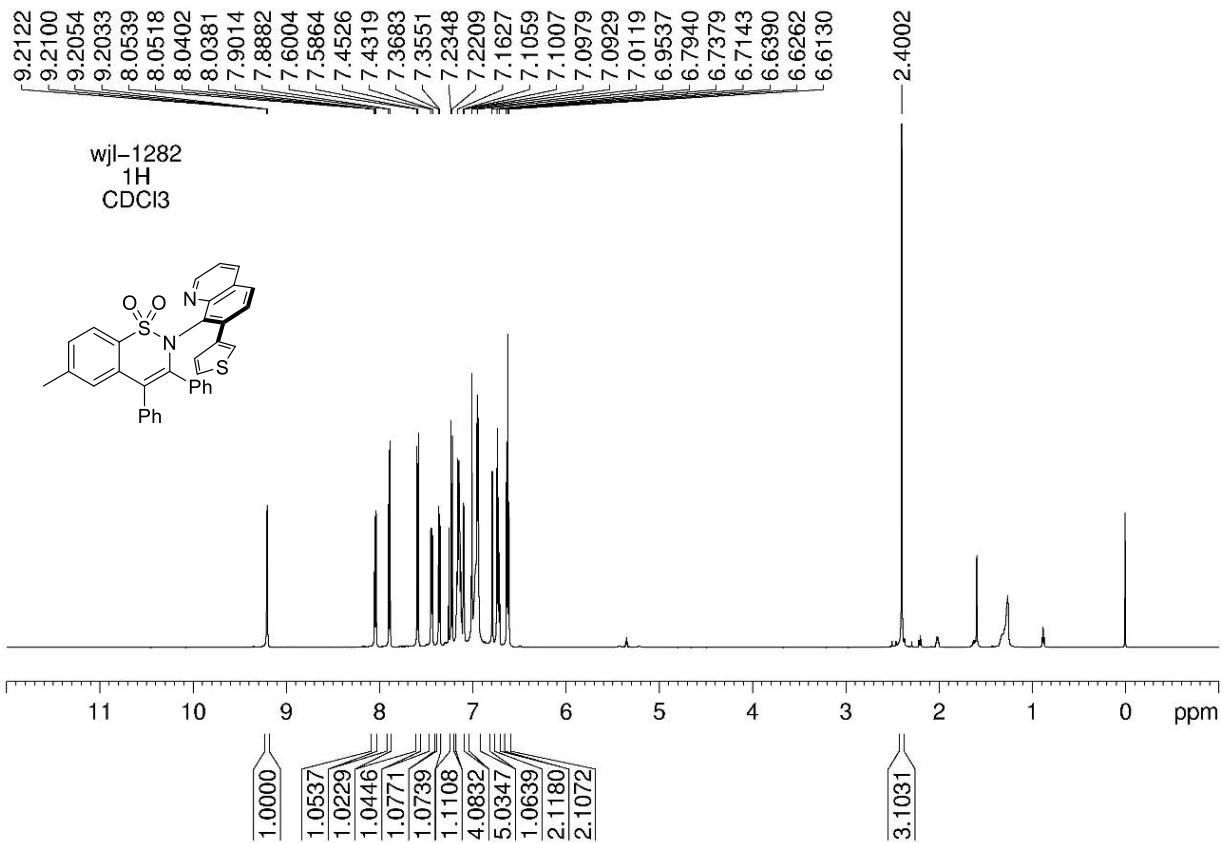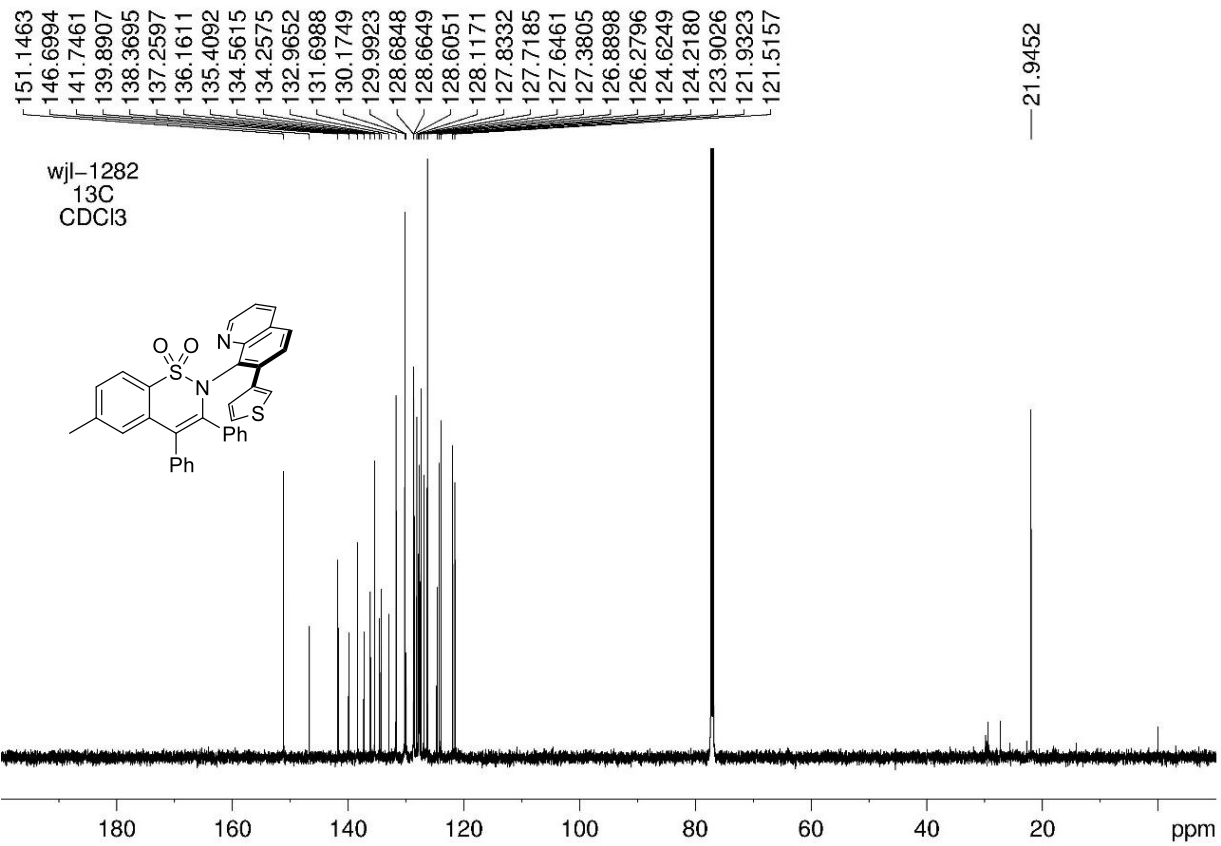

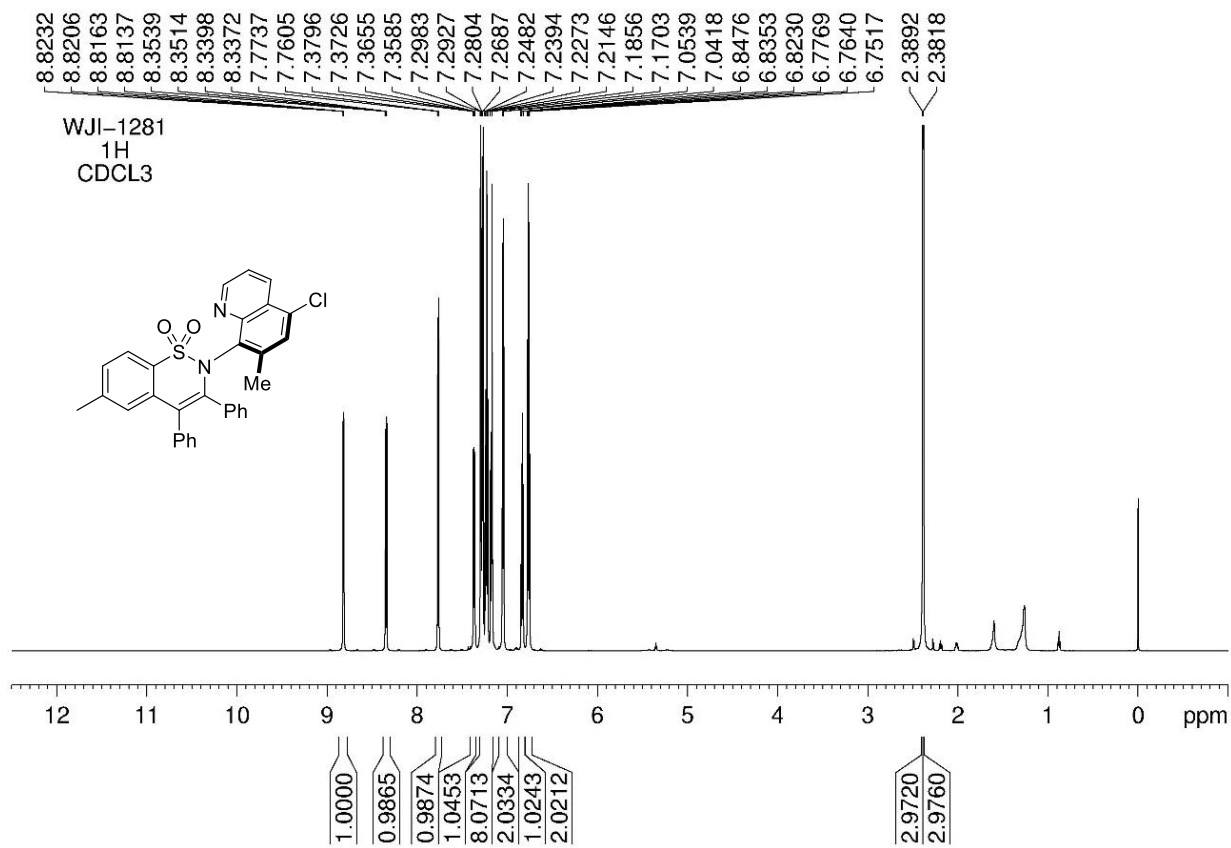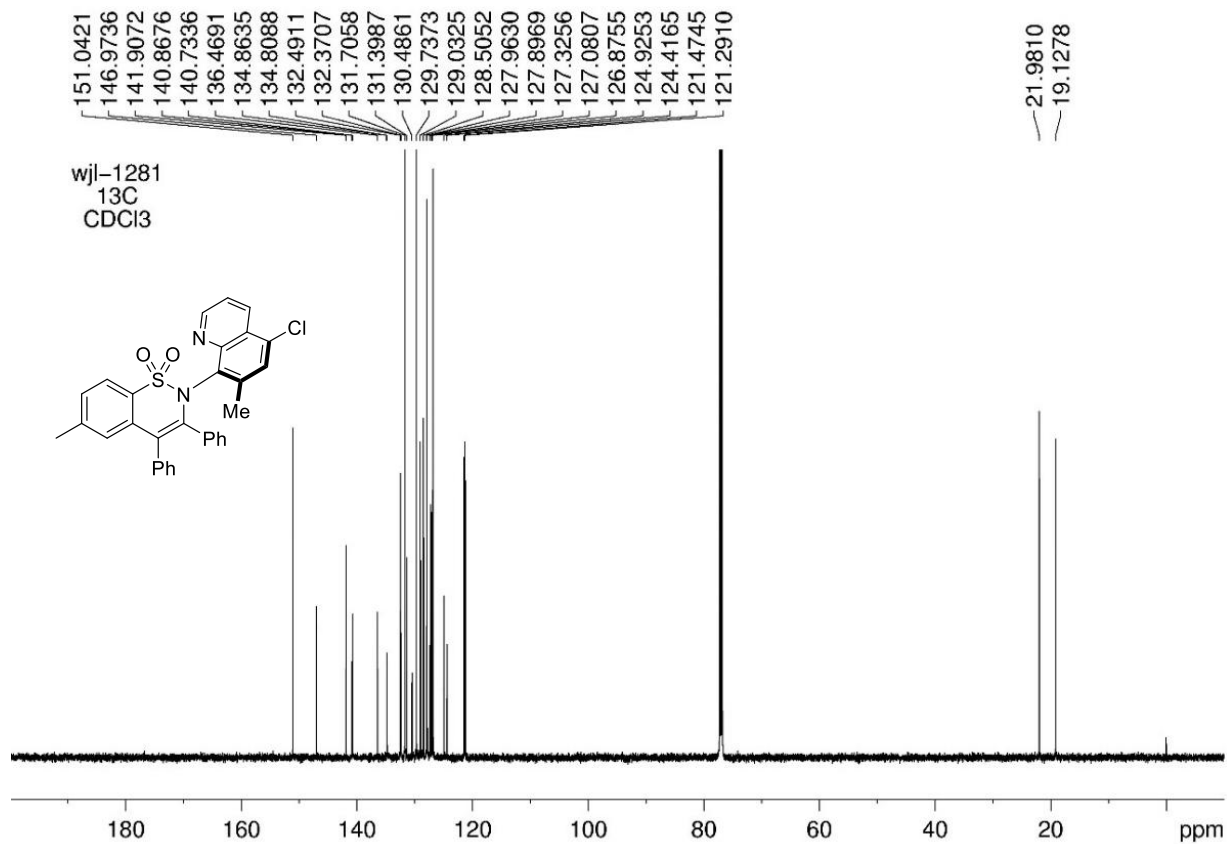

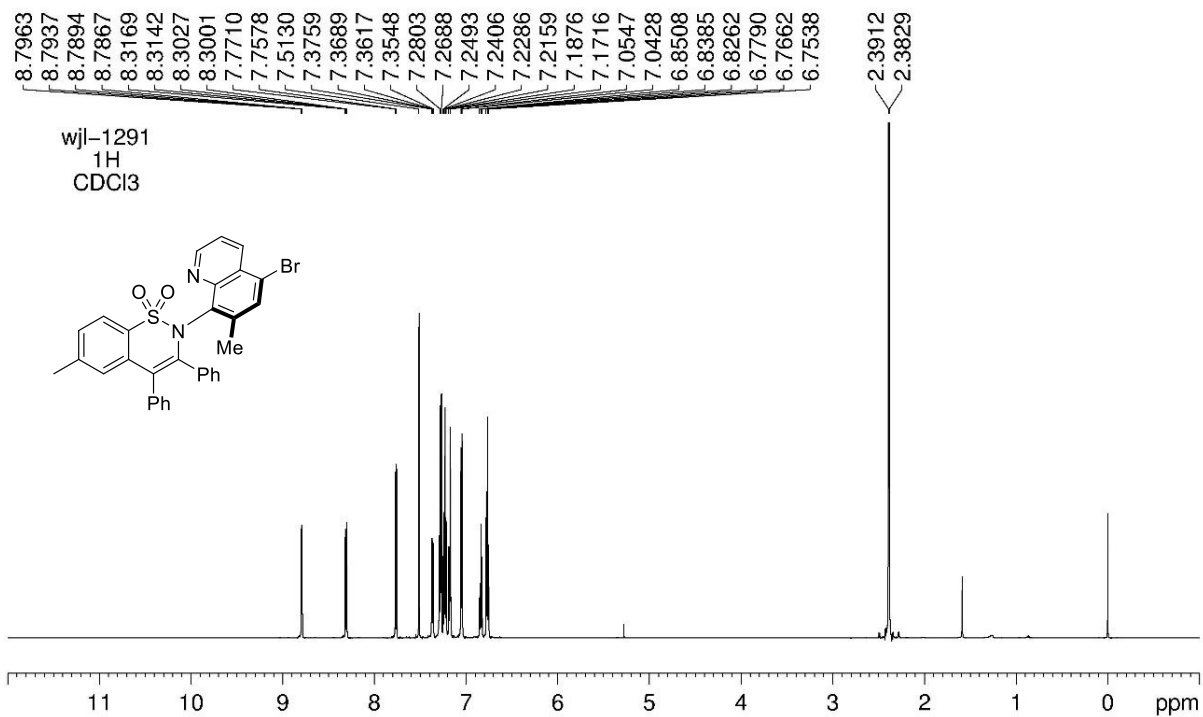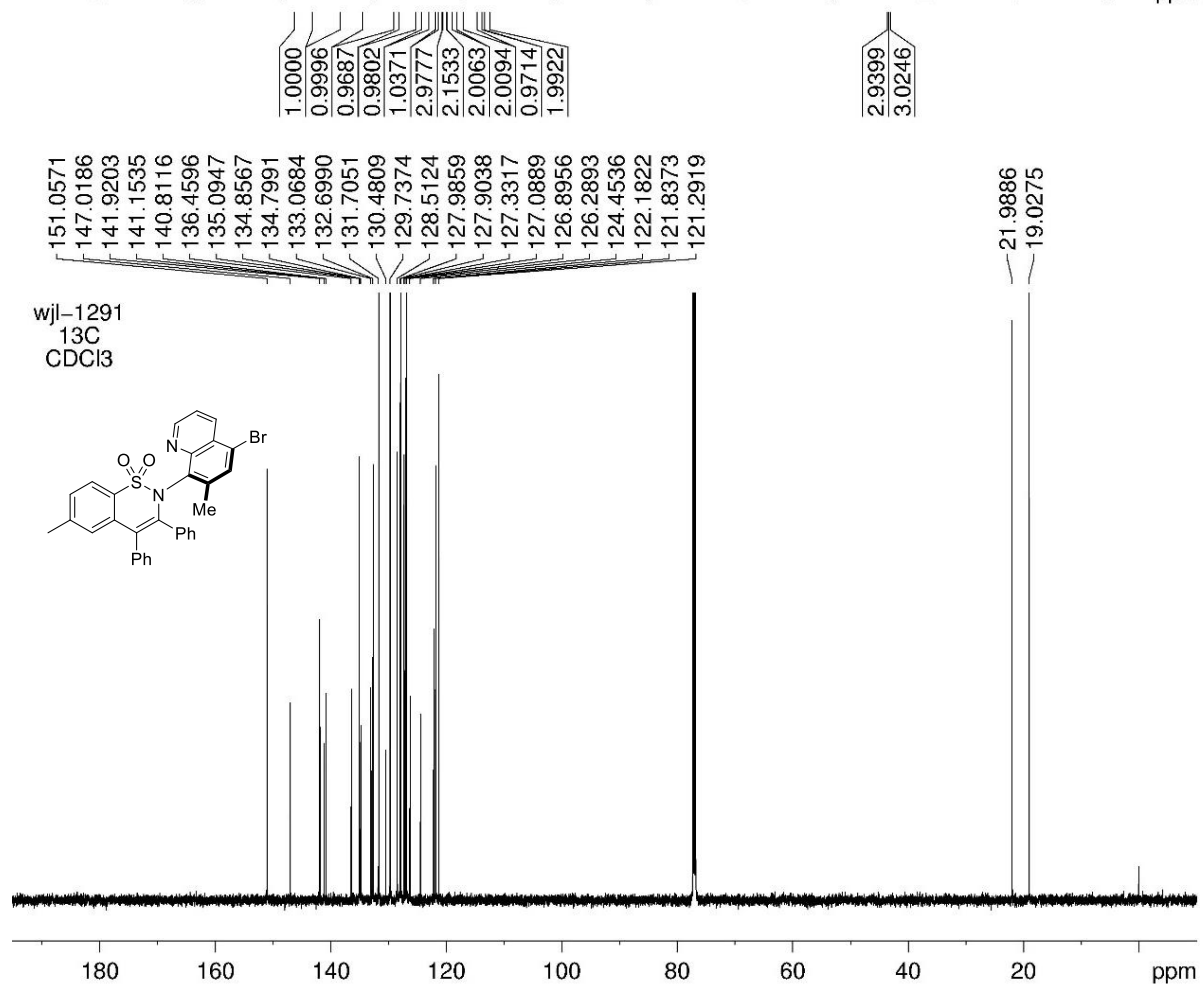

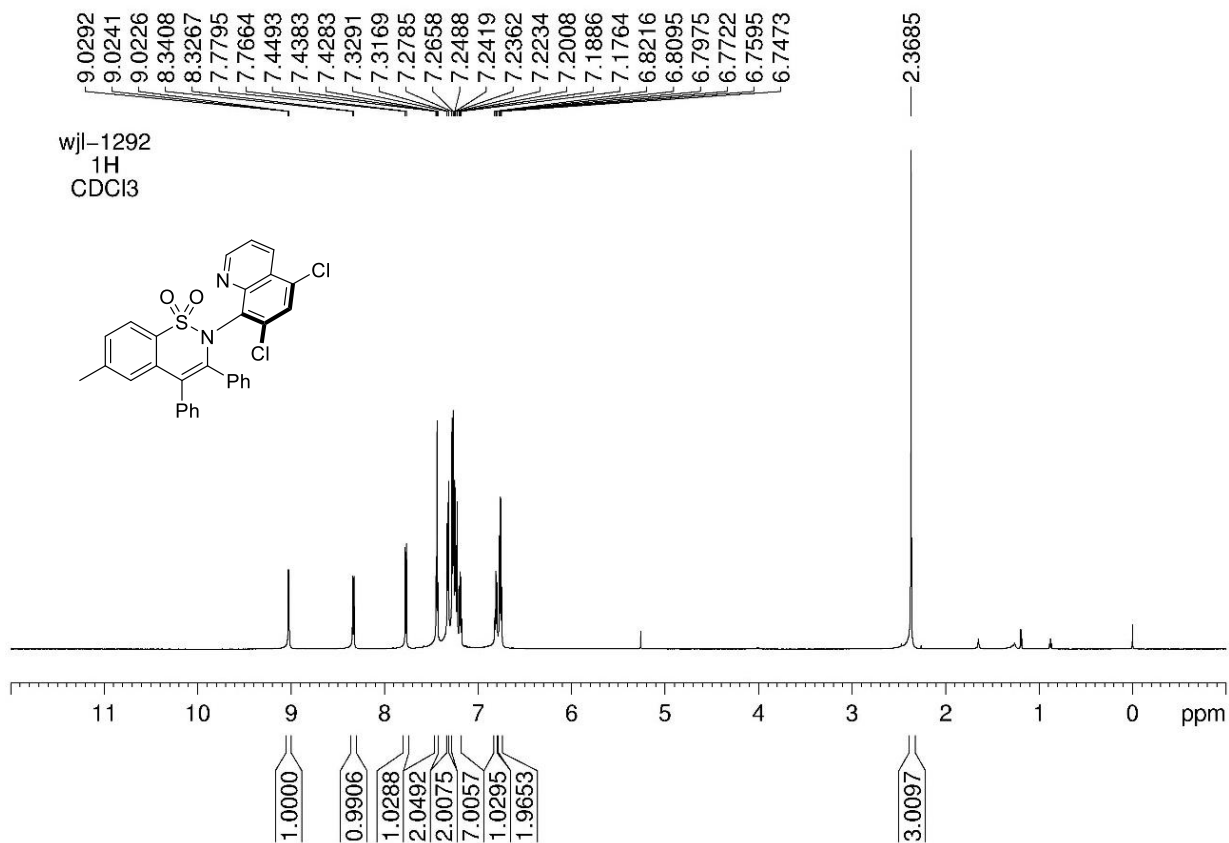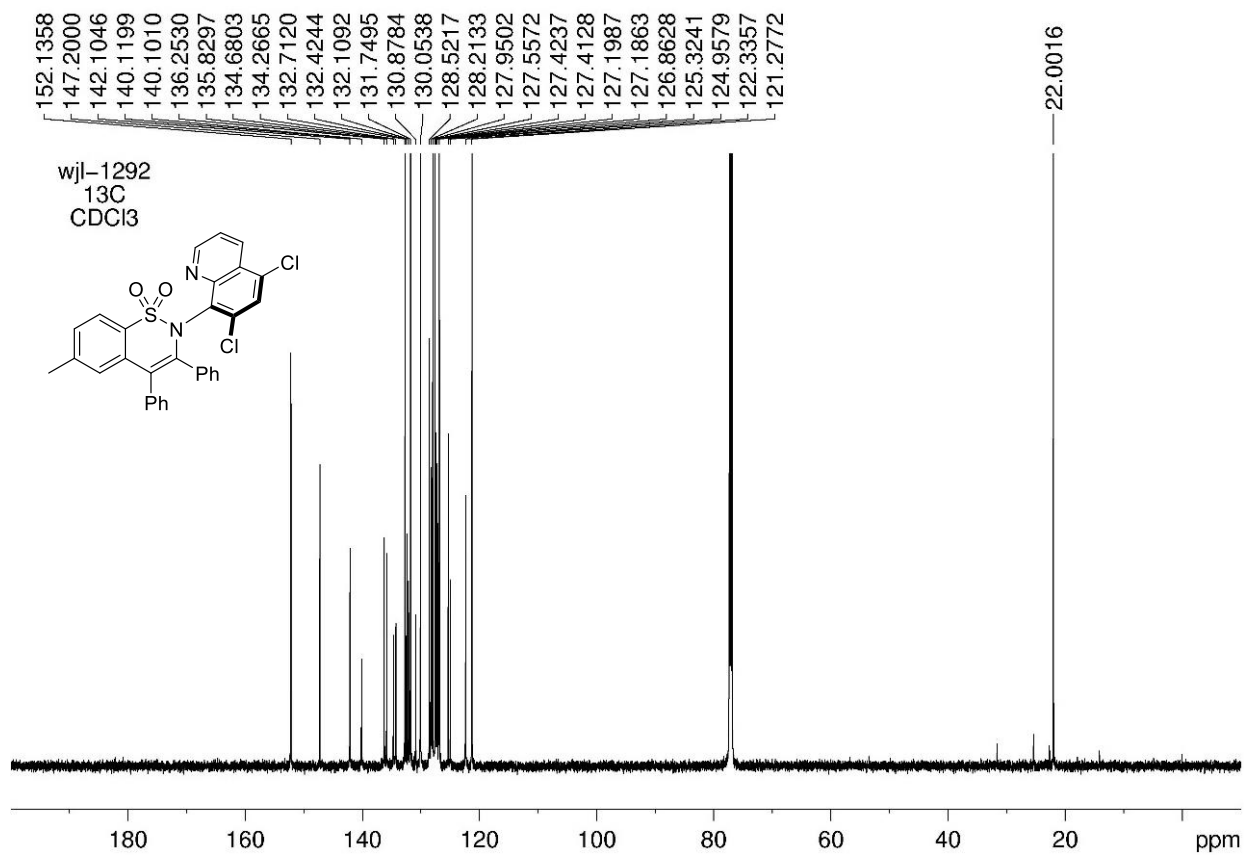

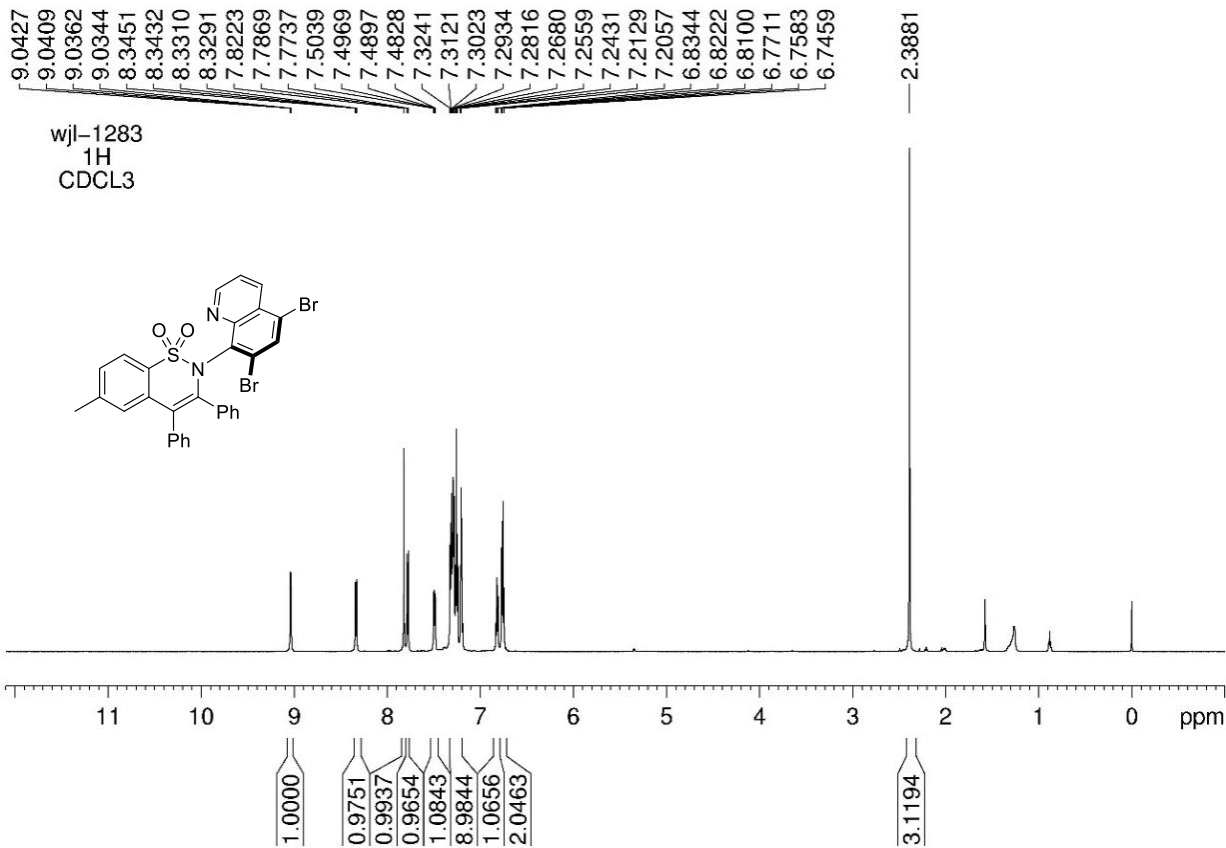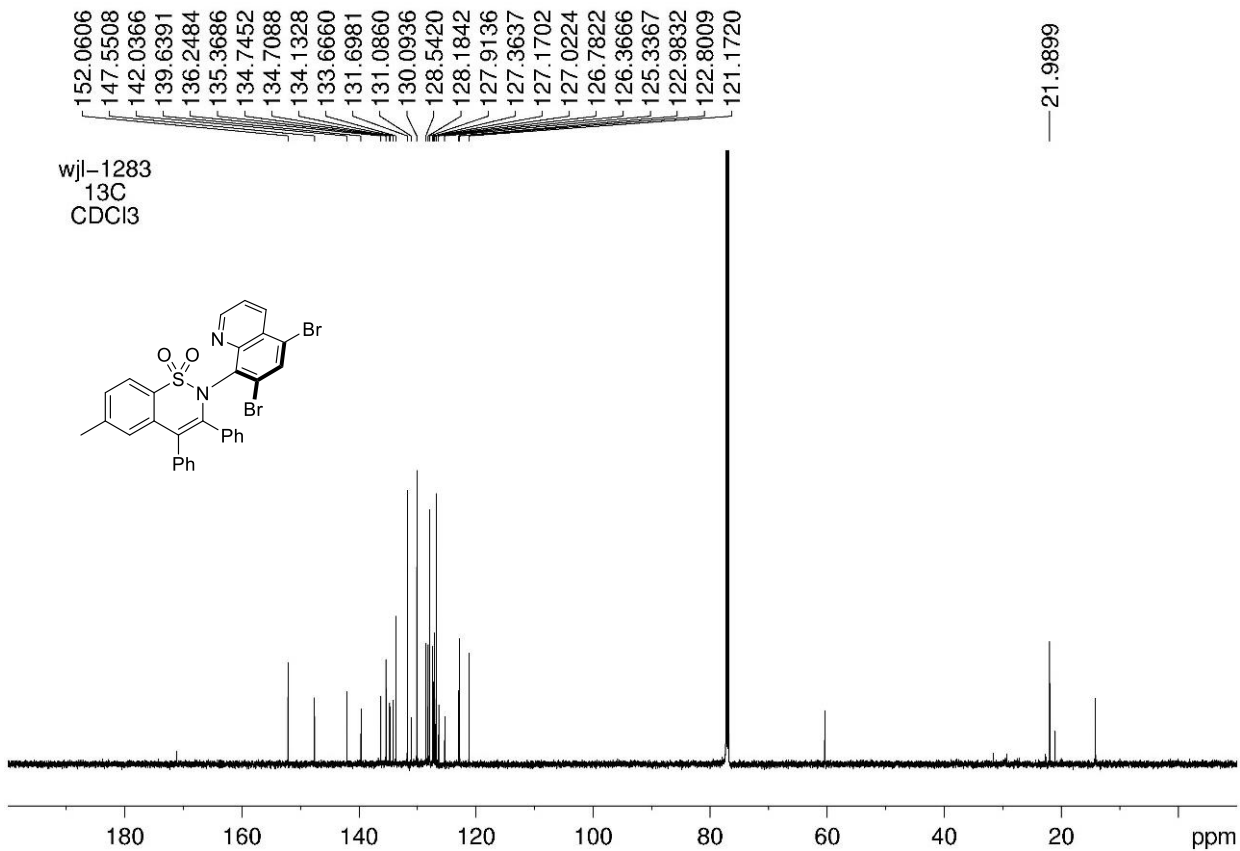



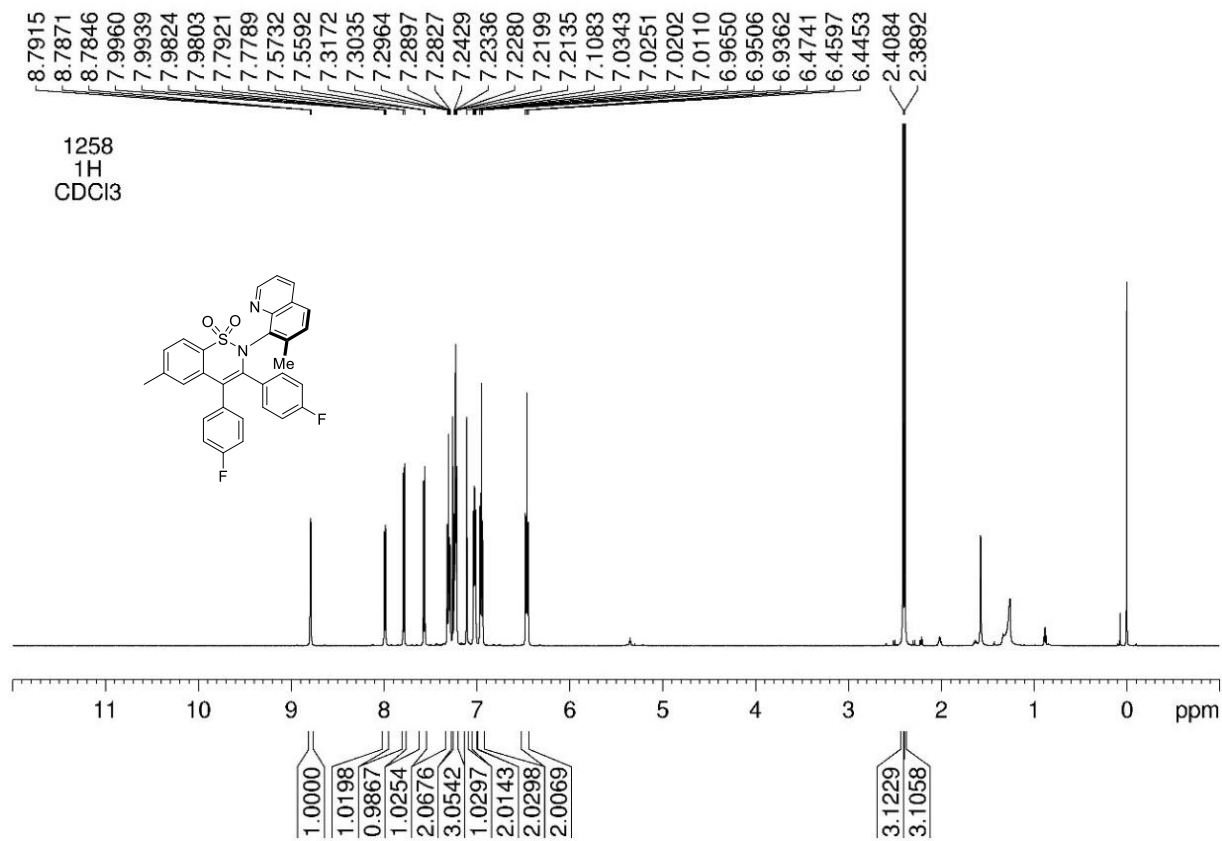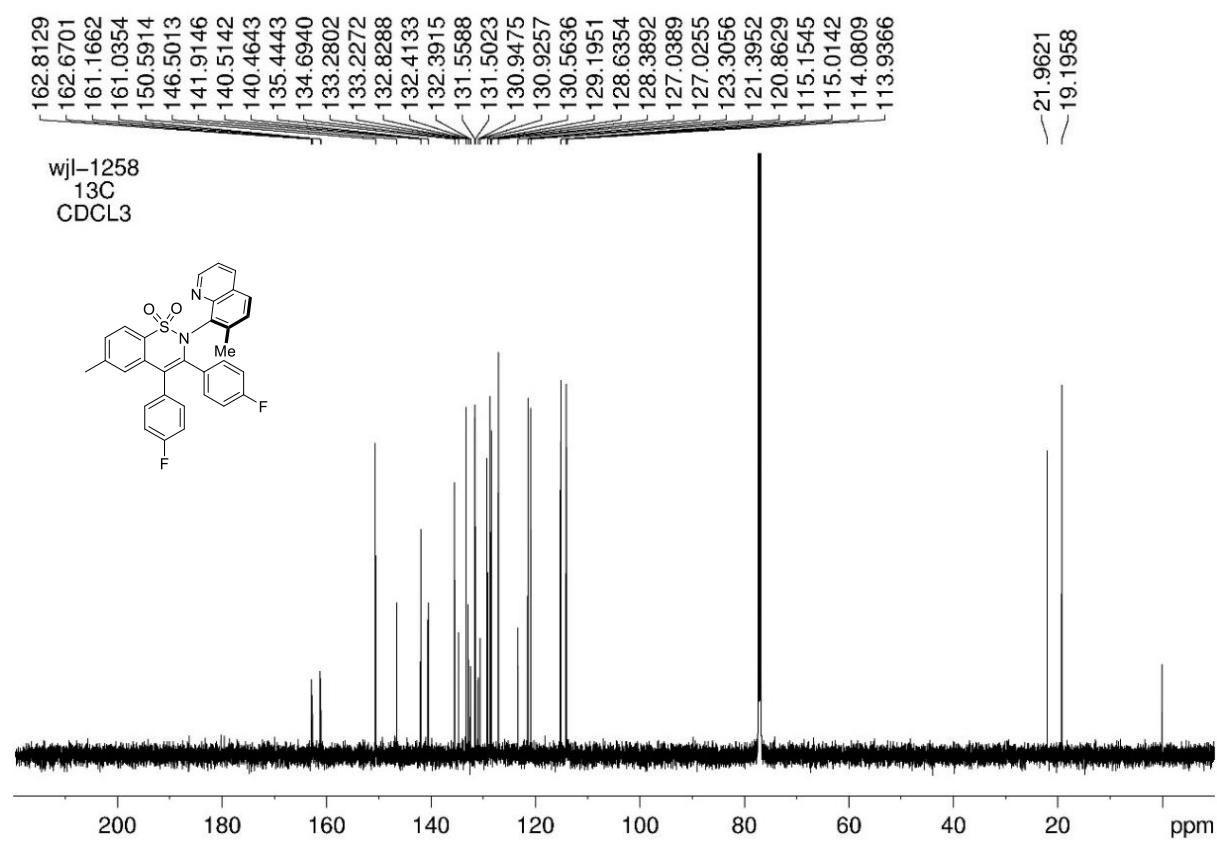

wjl-1258  
19F  
CDCl3

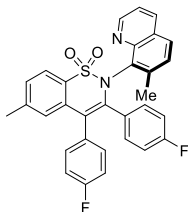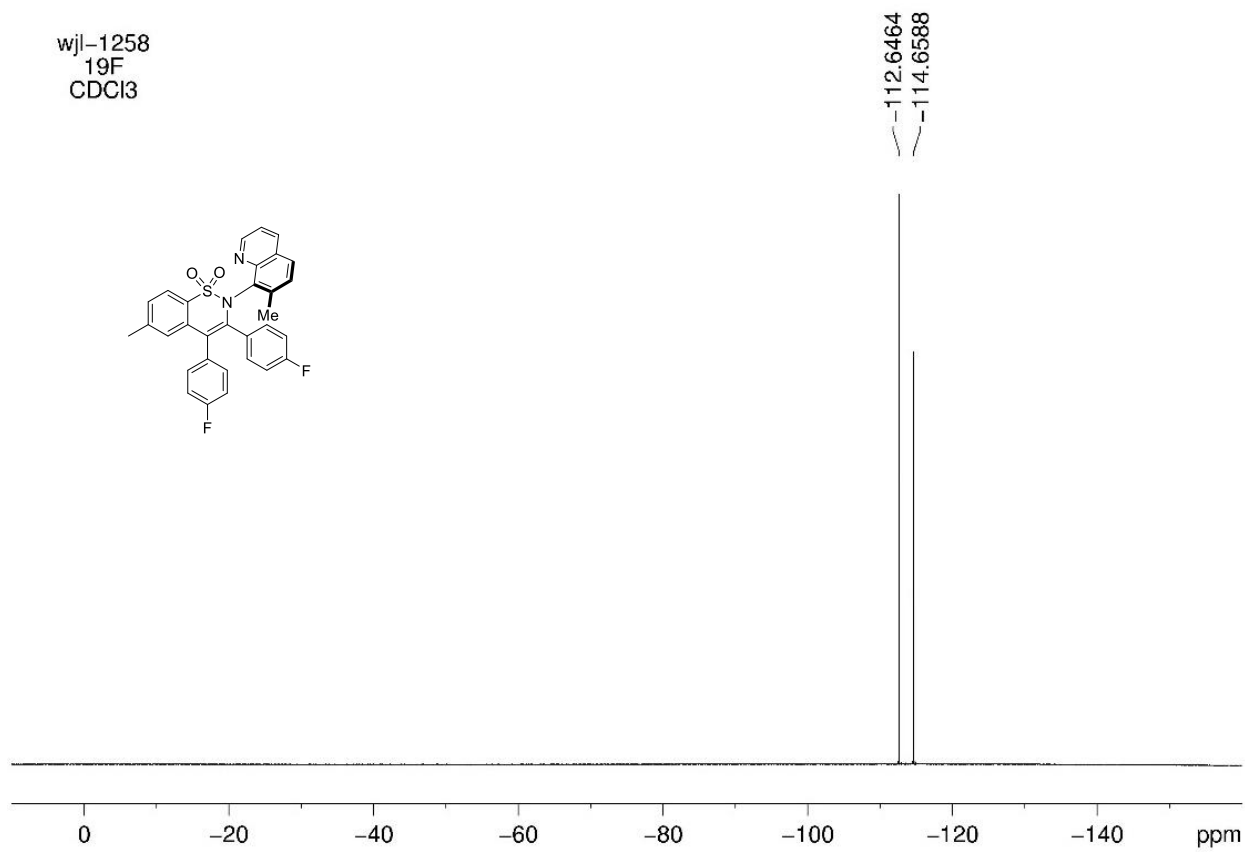

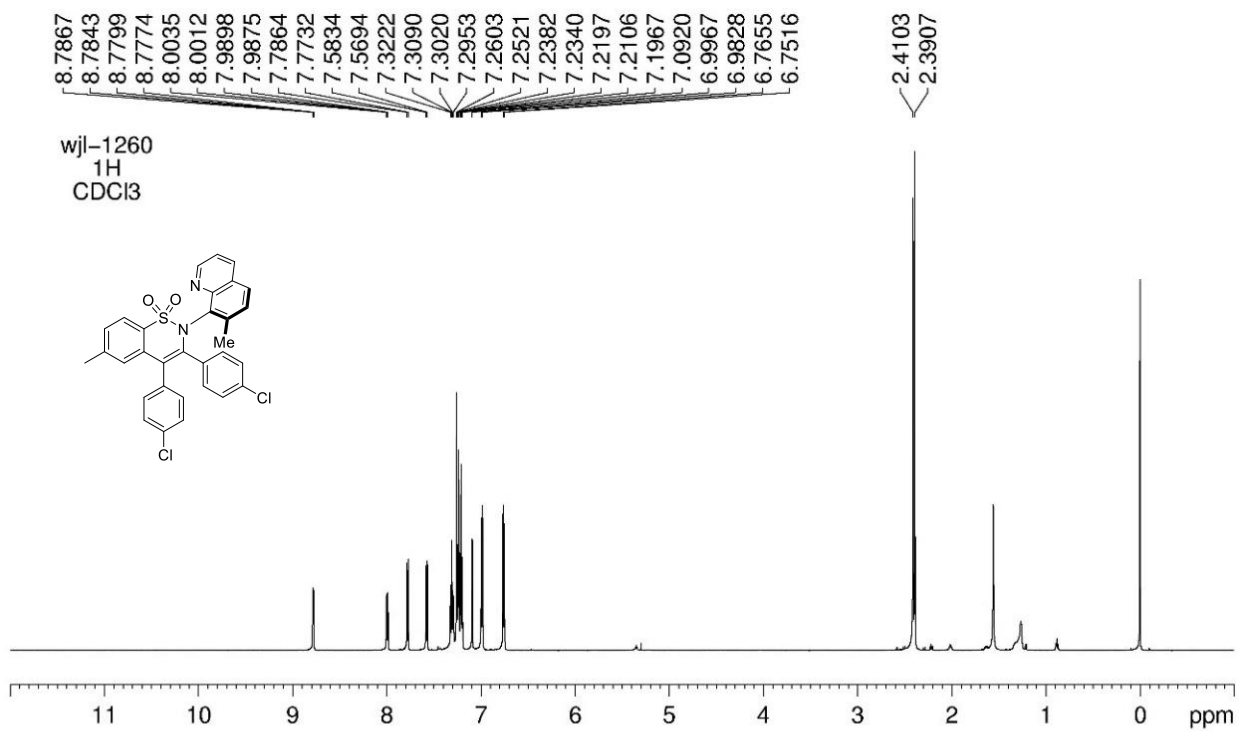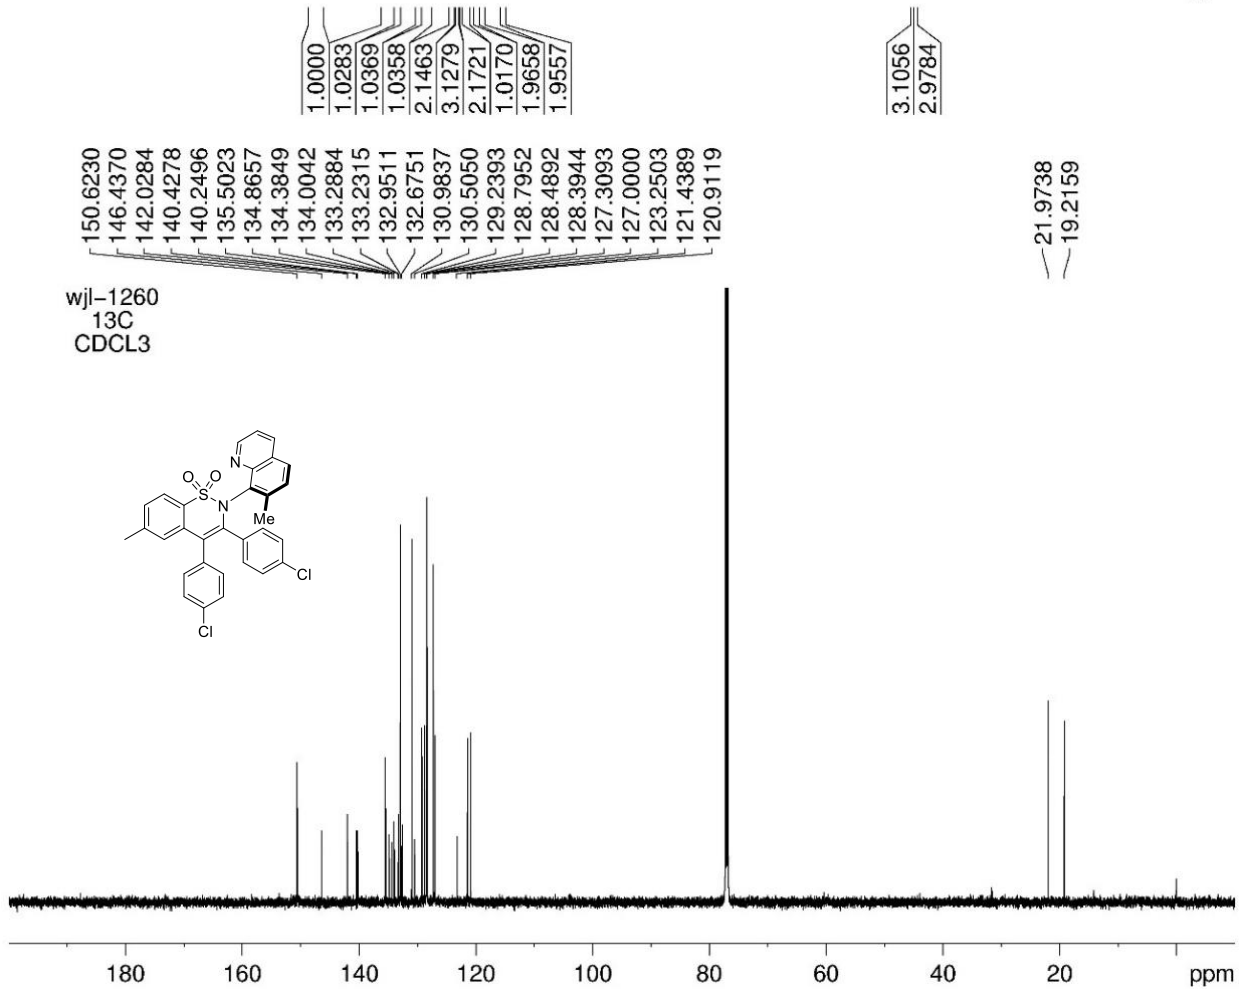

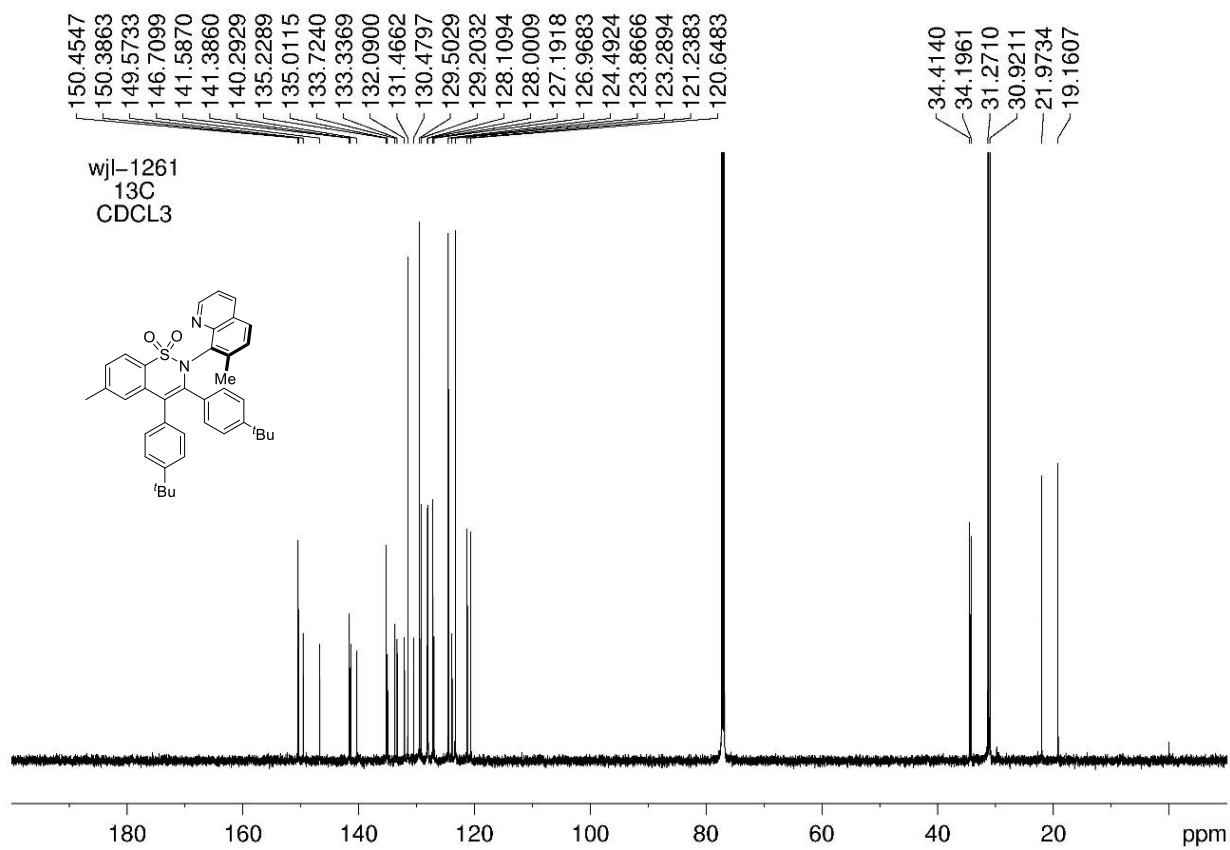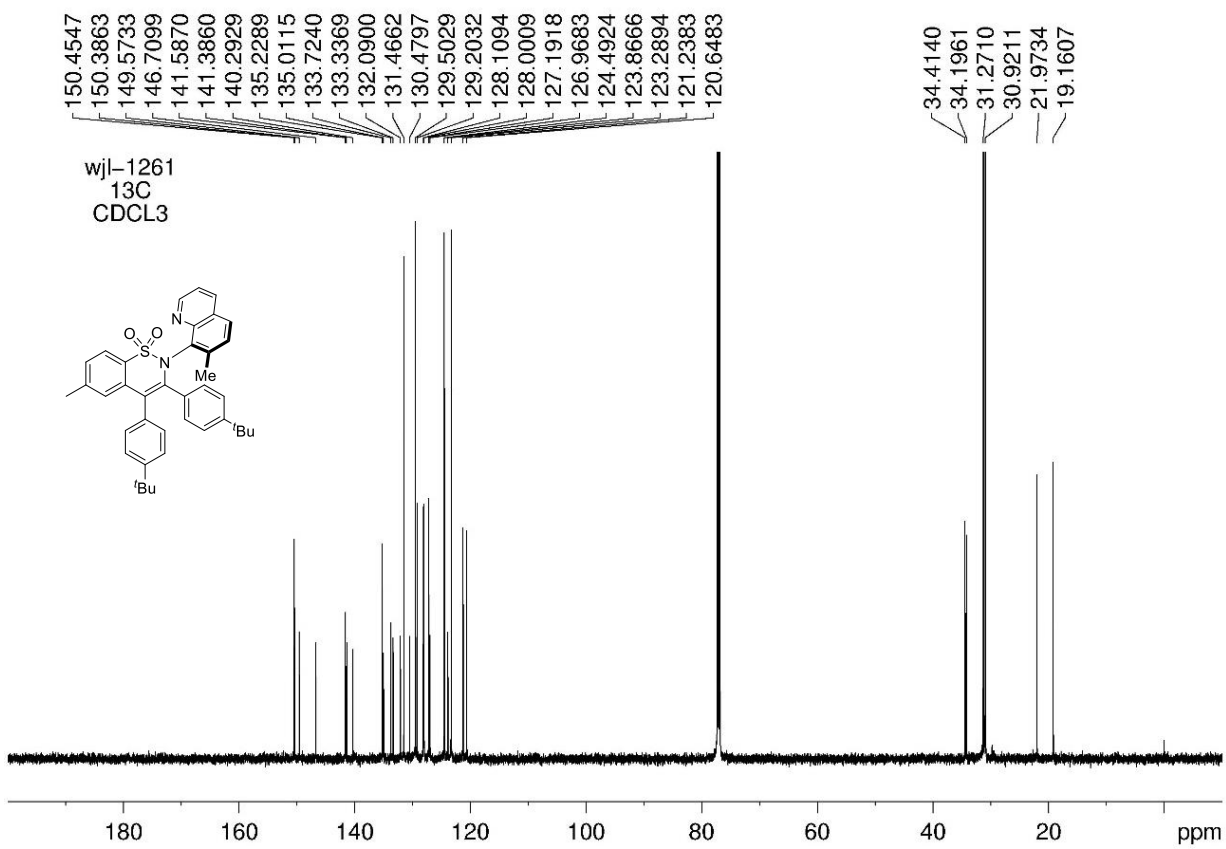

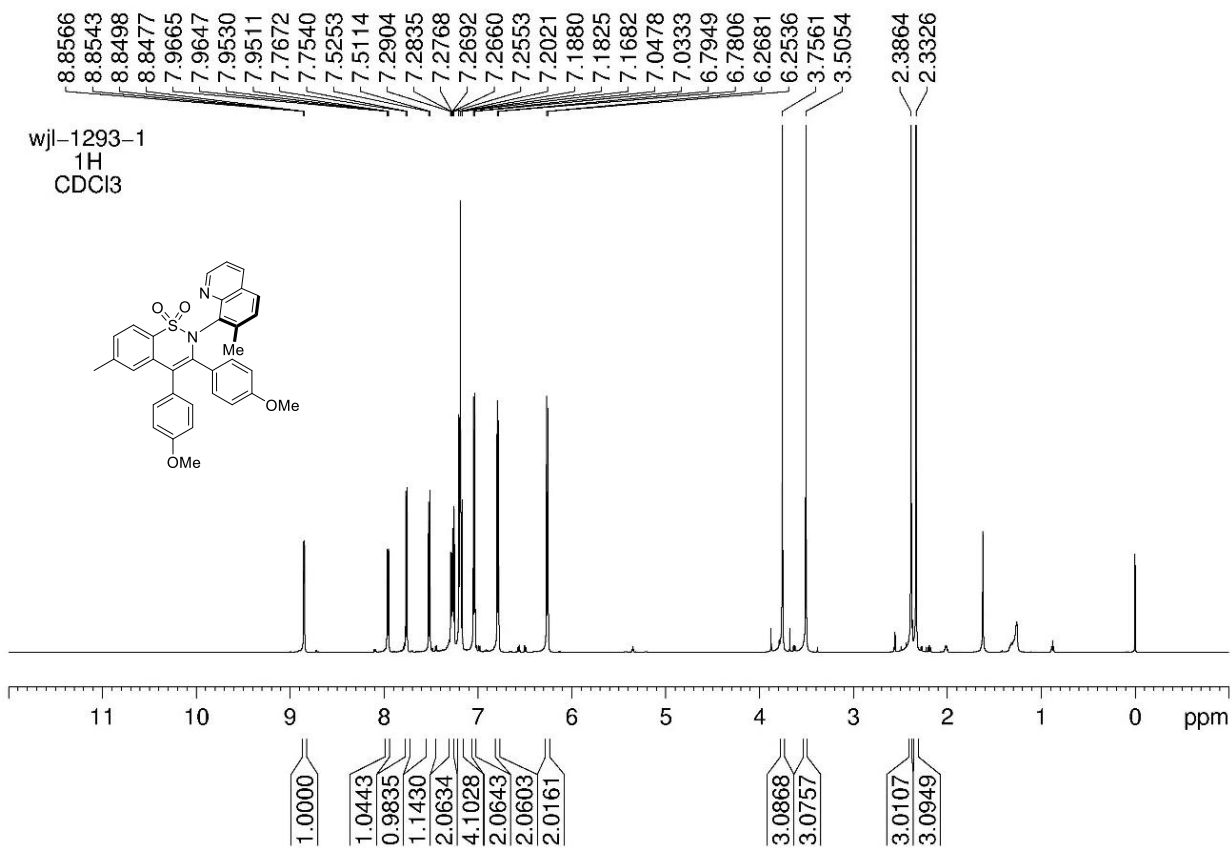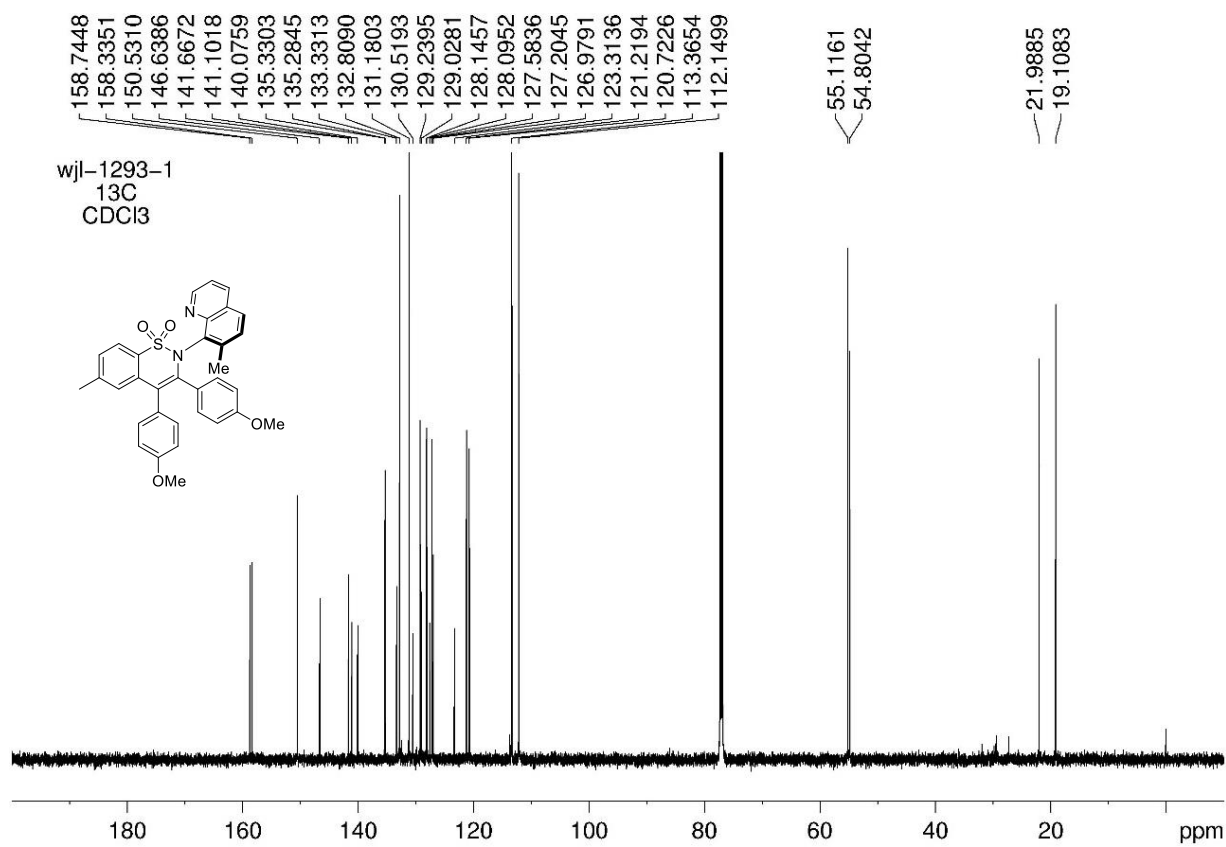

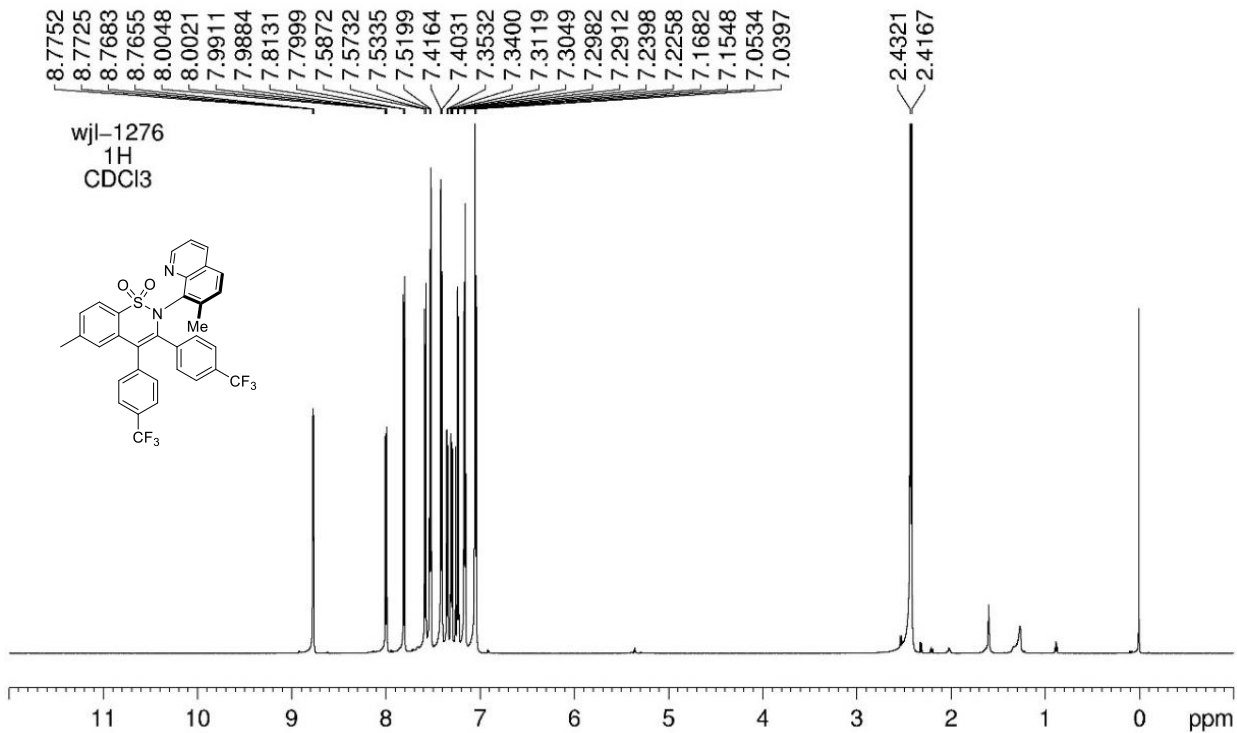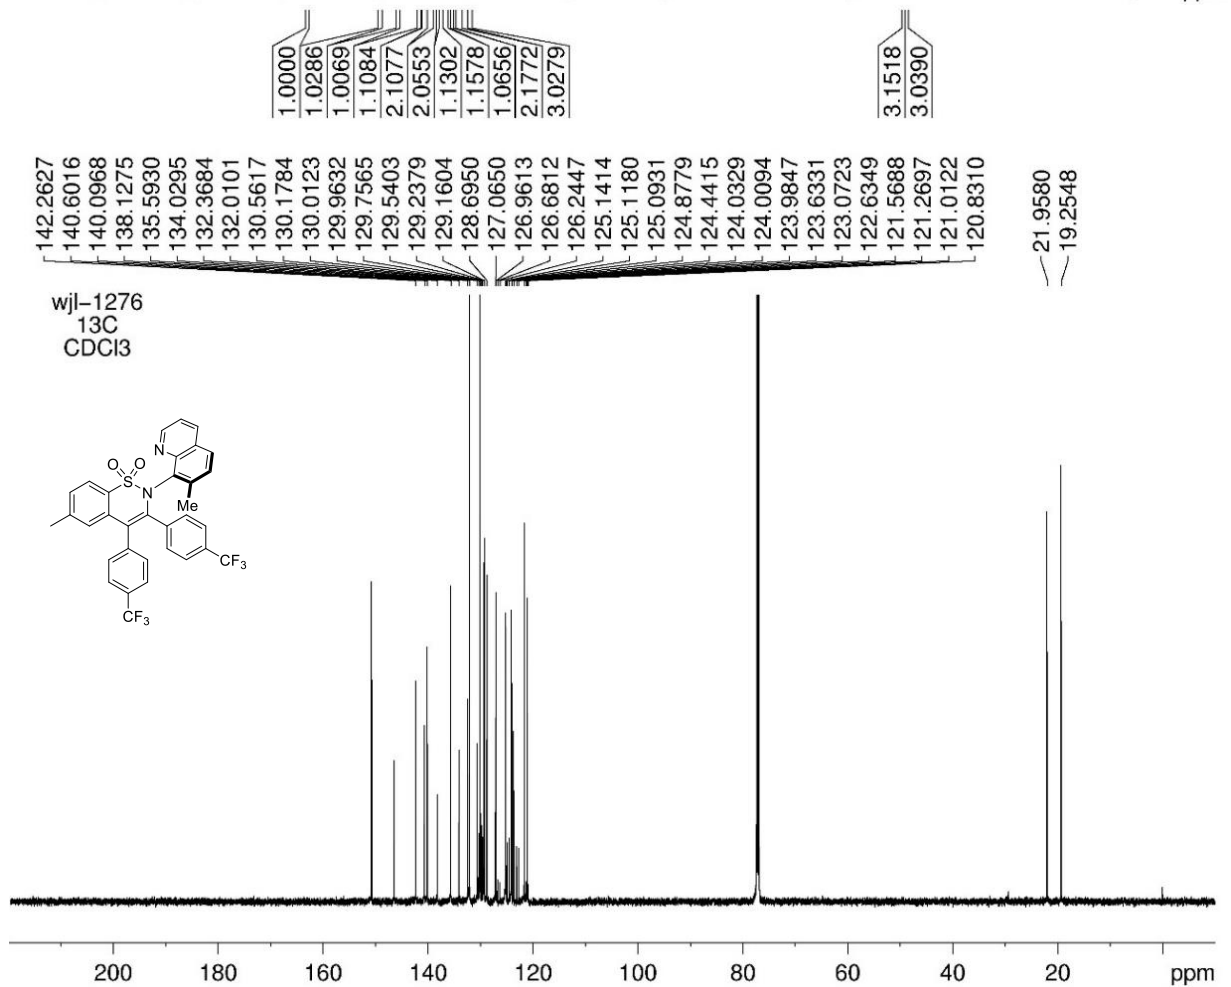

wjl-1276  
19F  
CDCl3

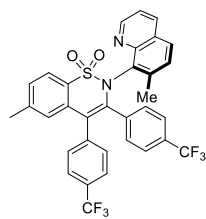

-62.5528  
-62.9034

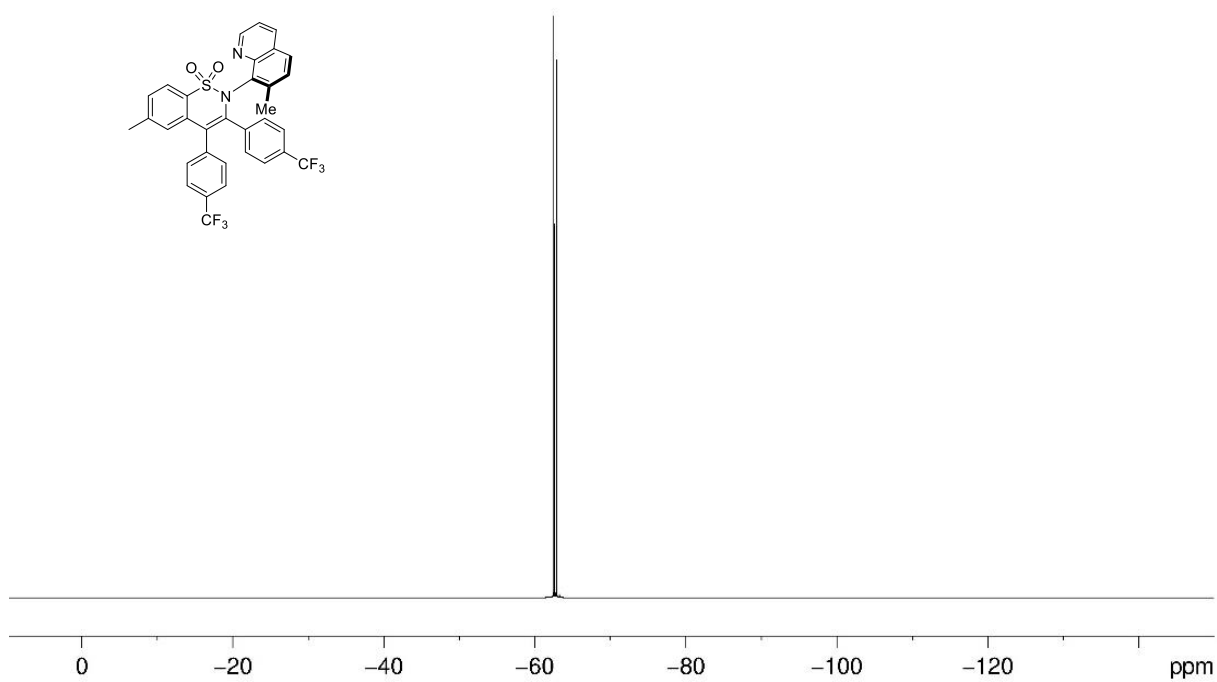

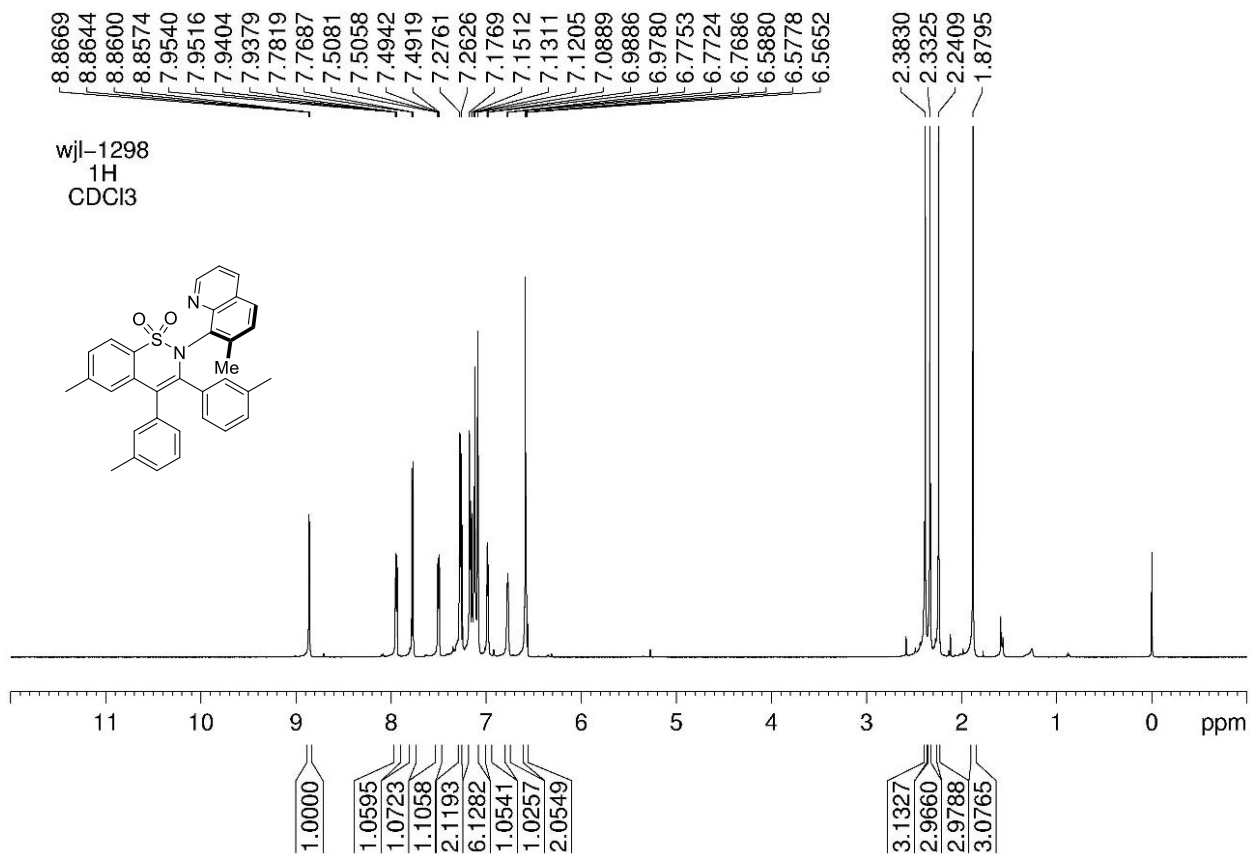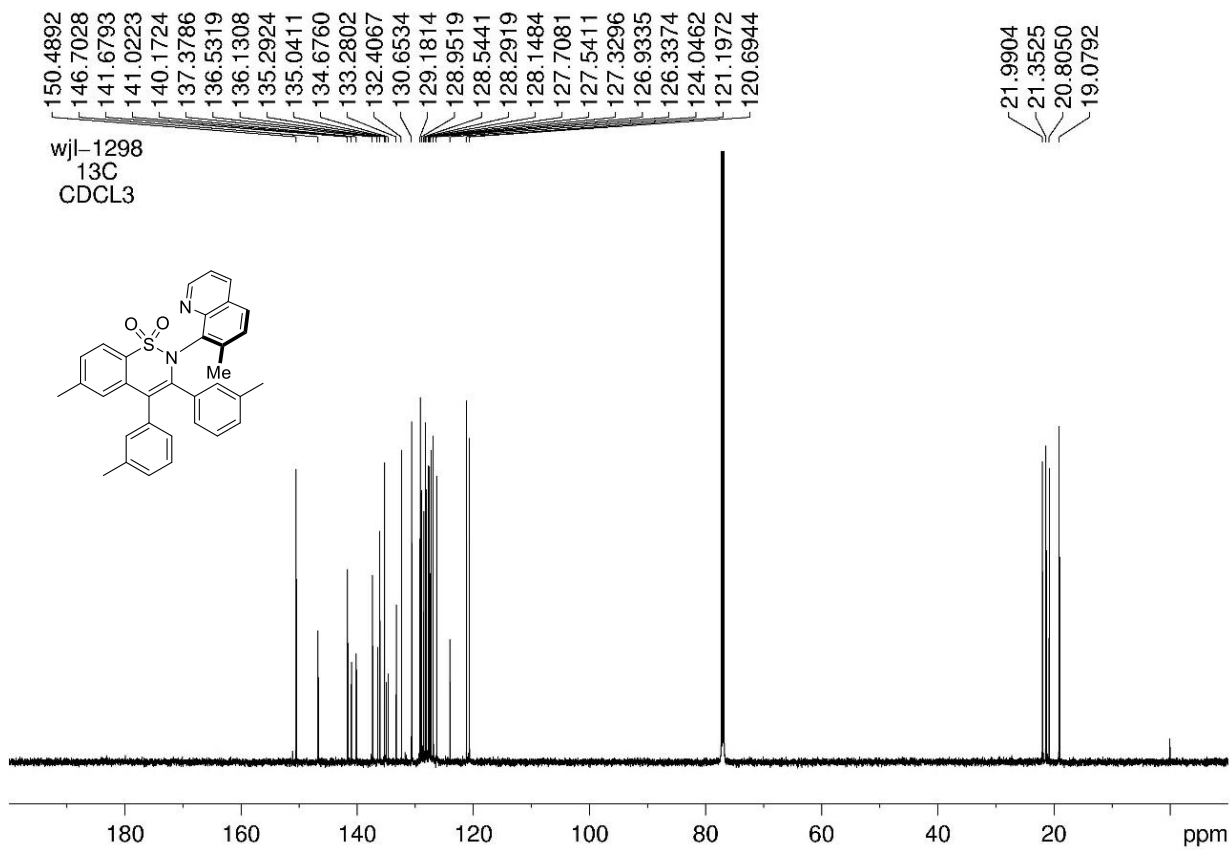



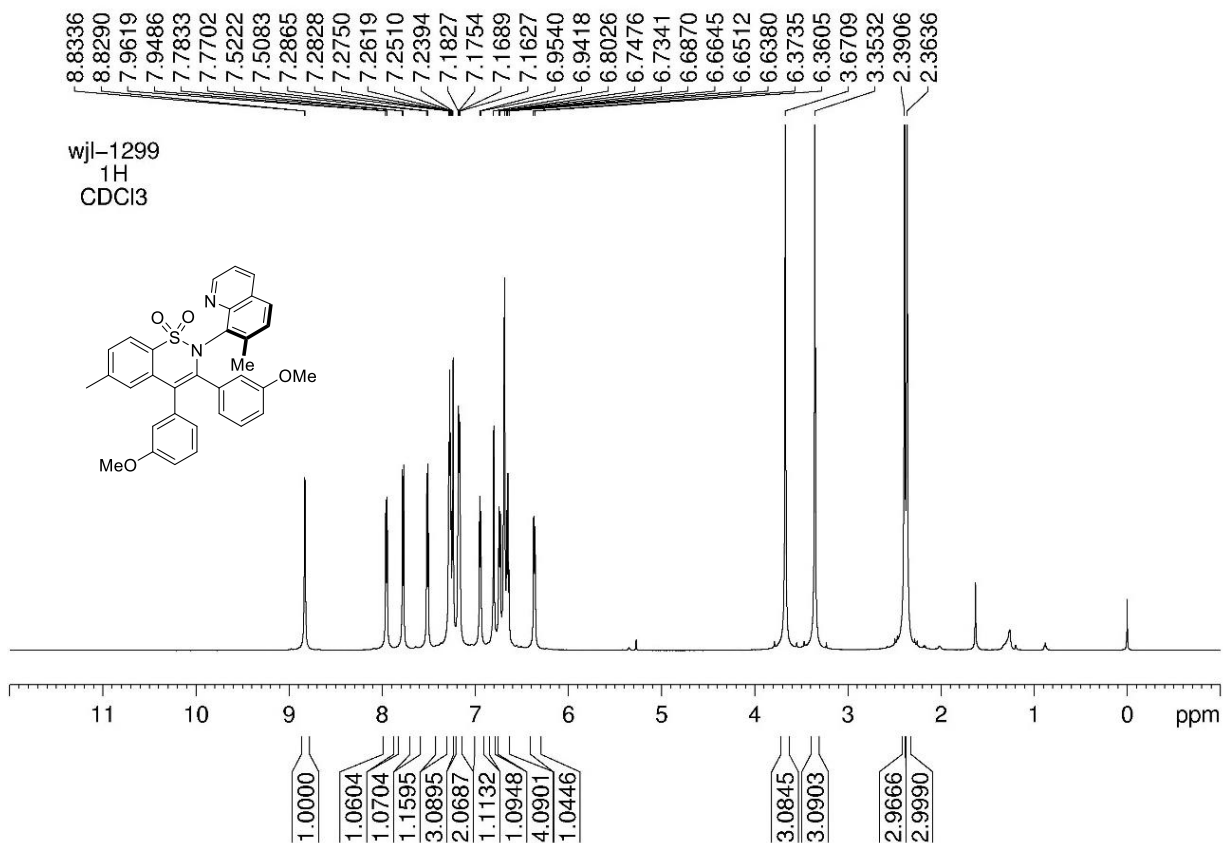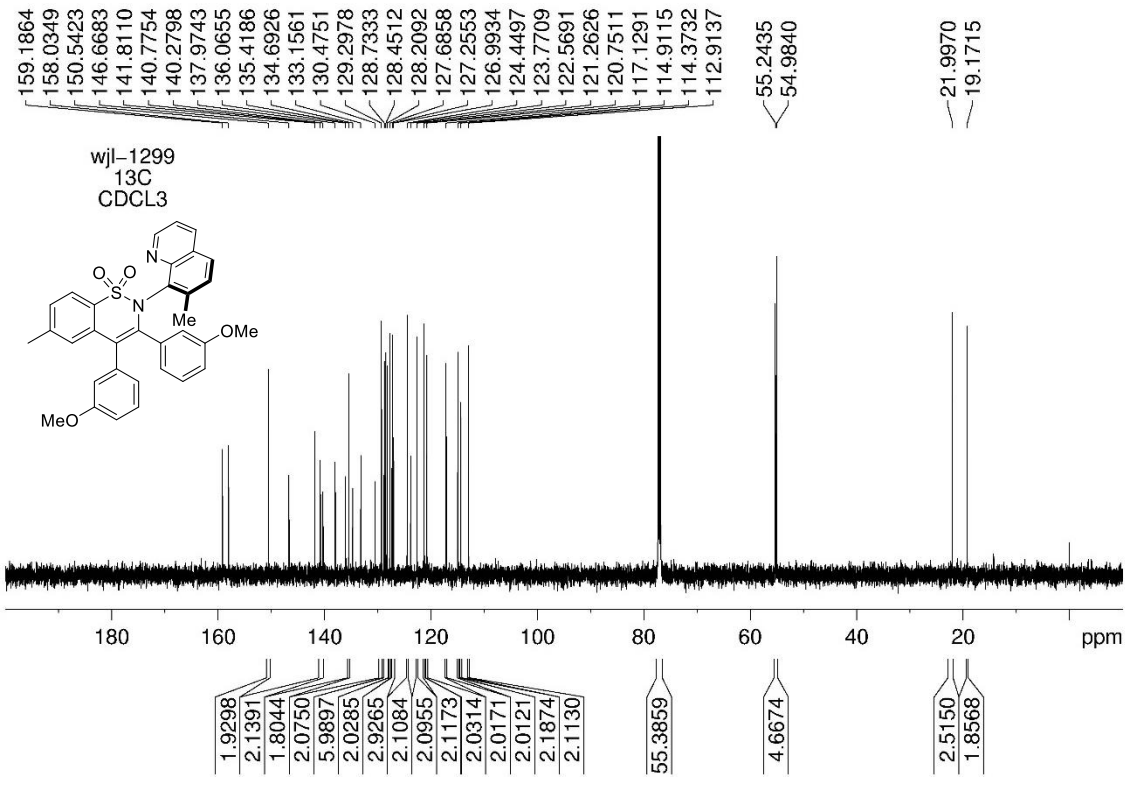

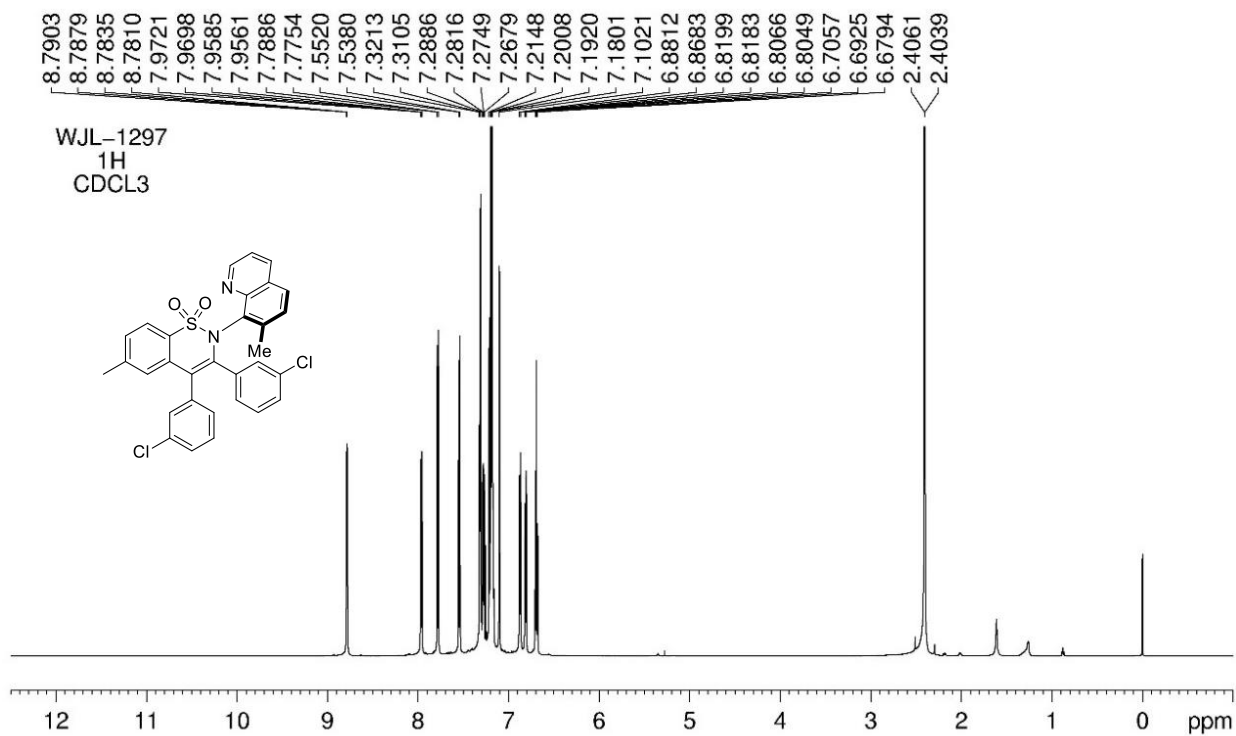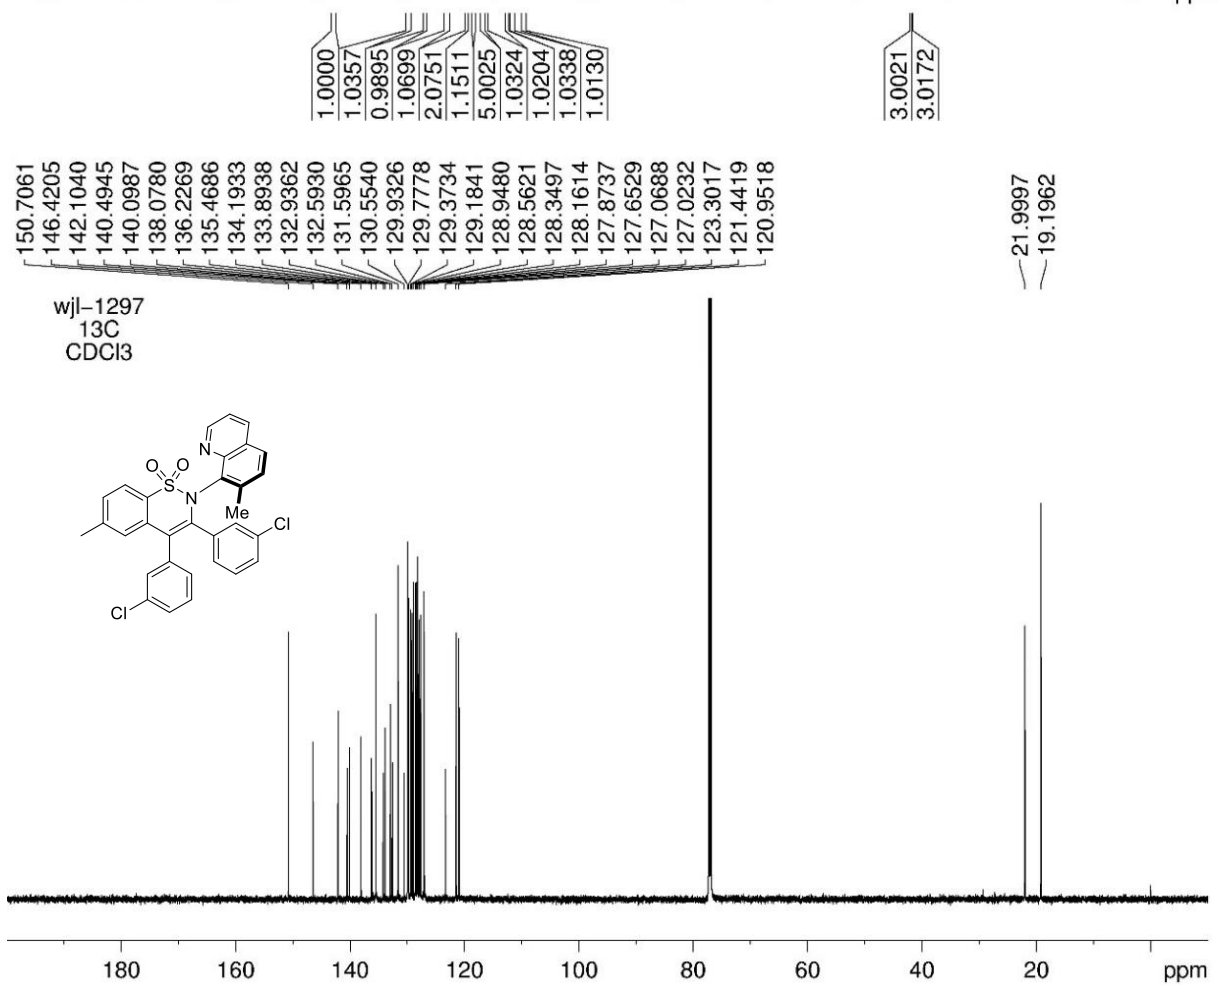

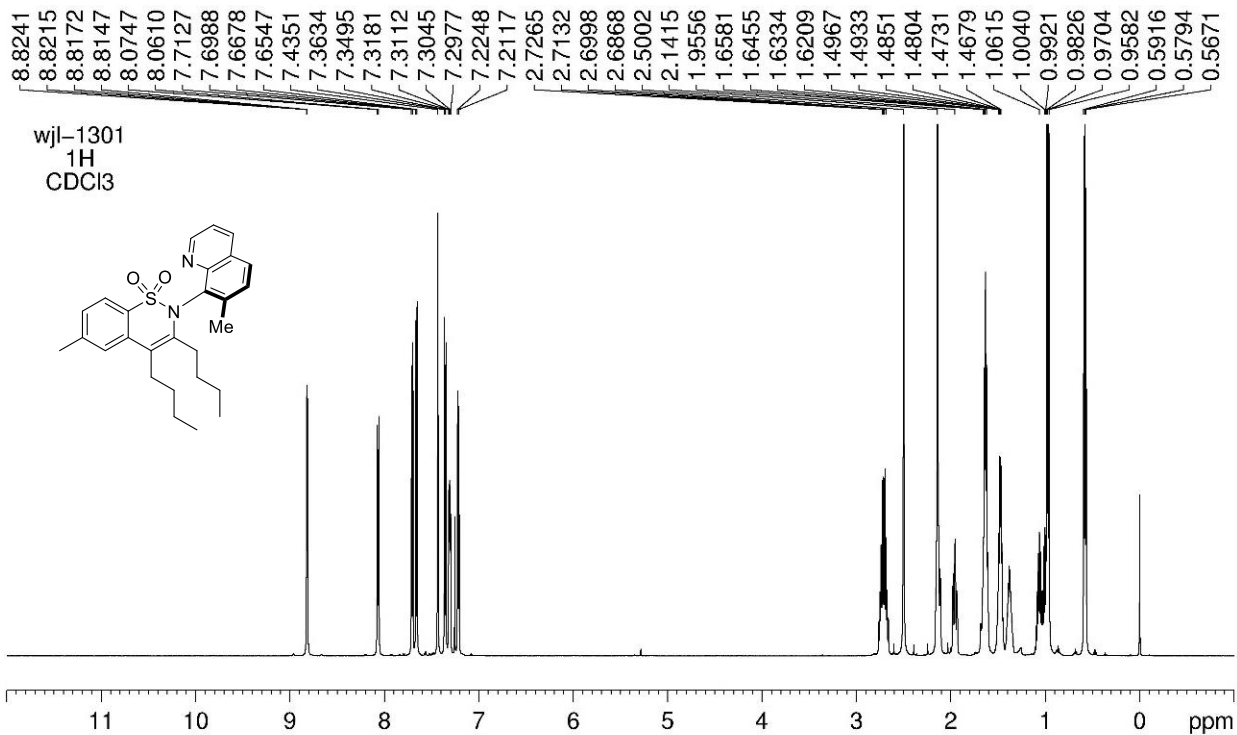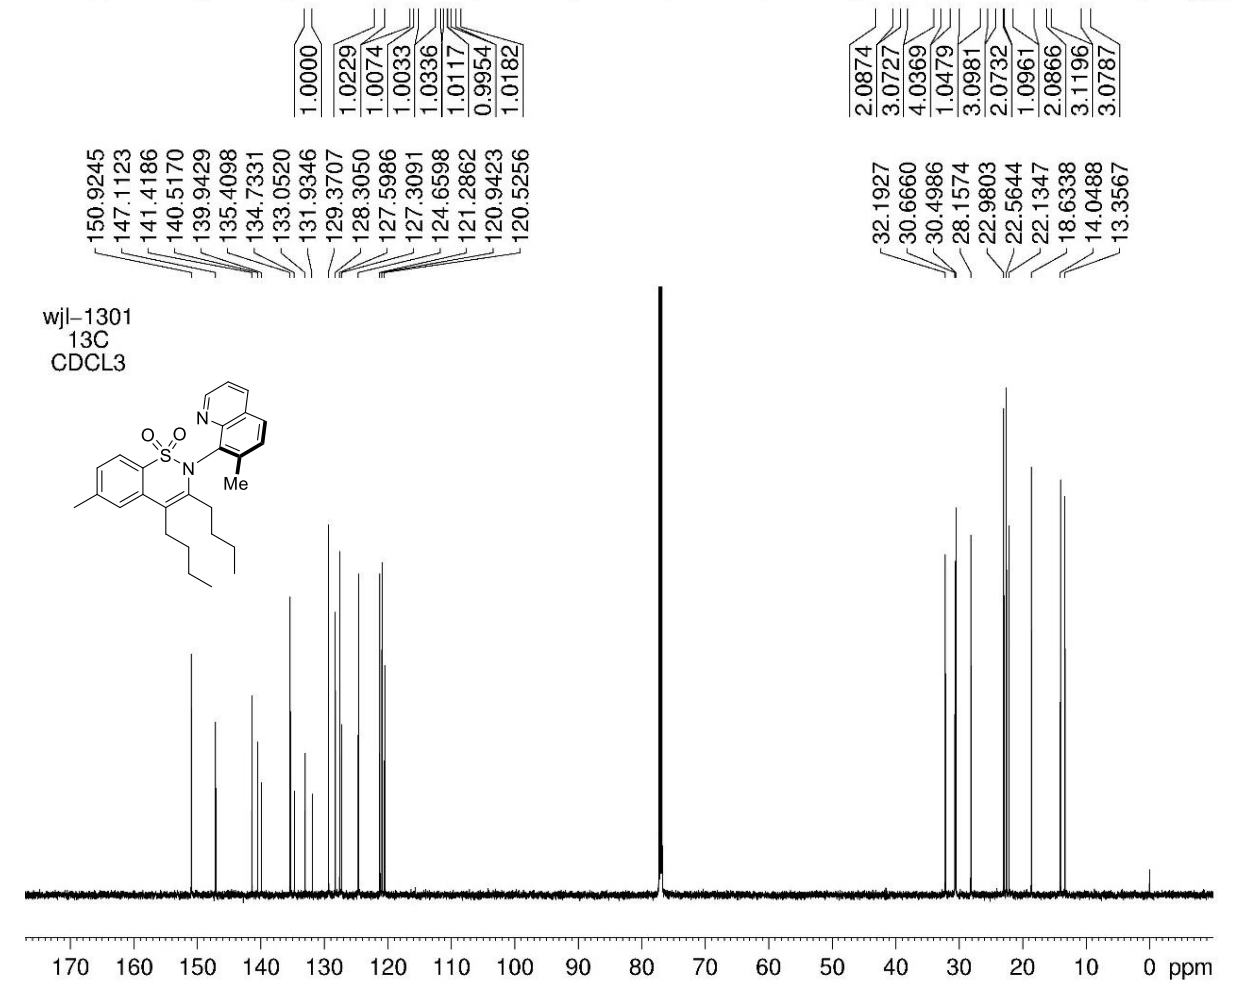

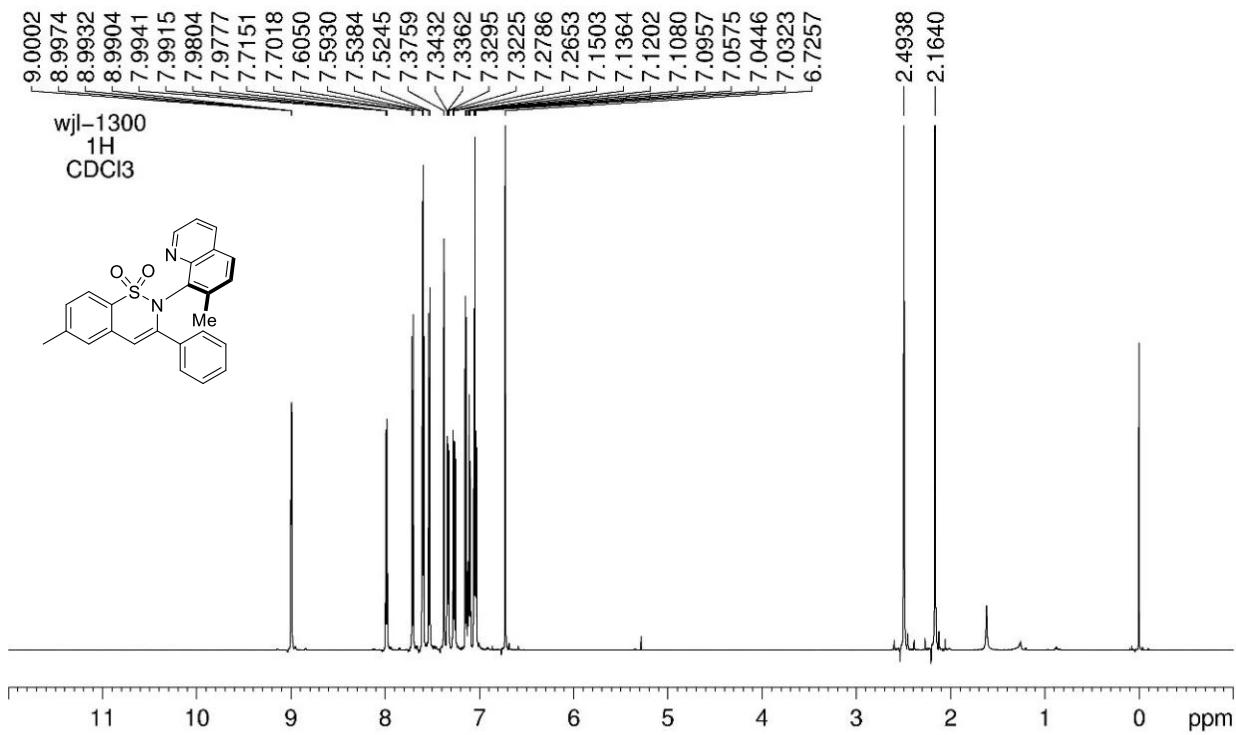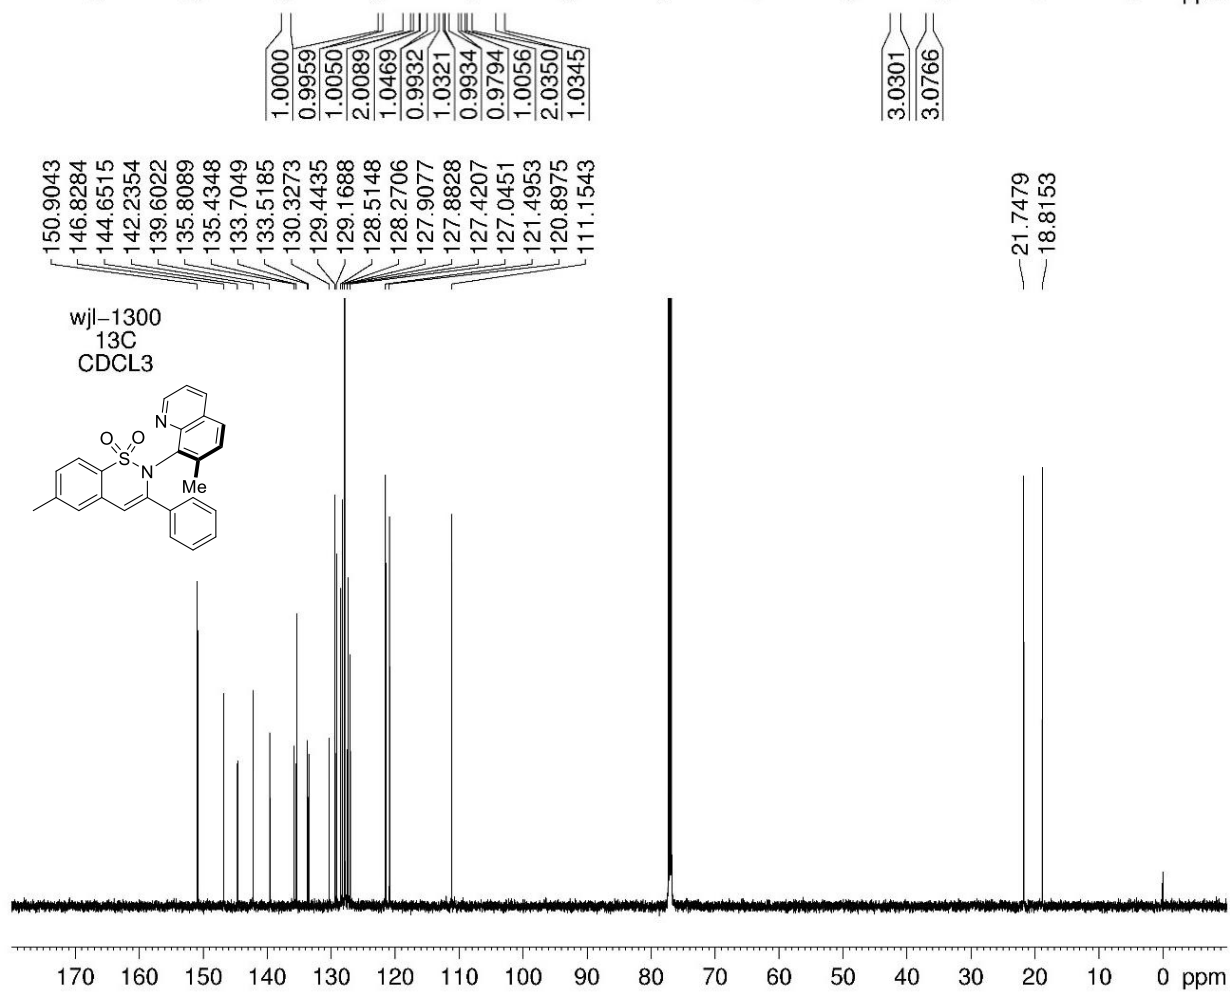

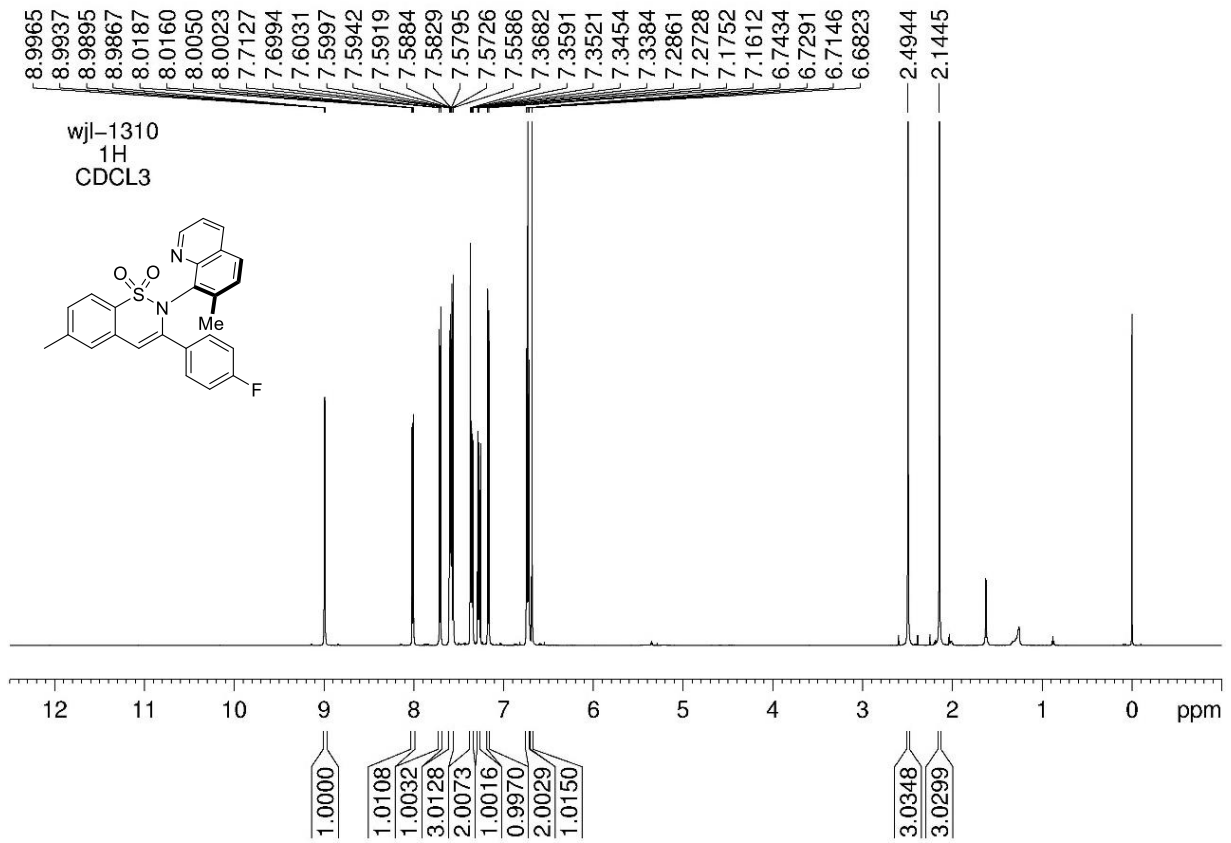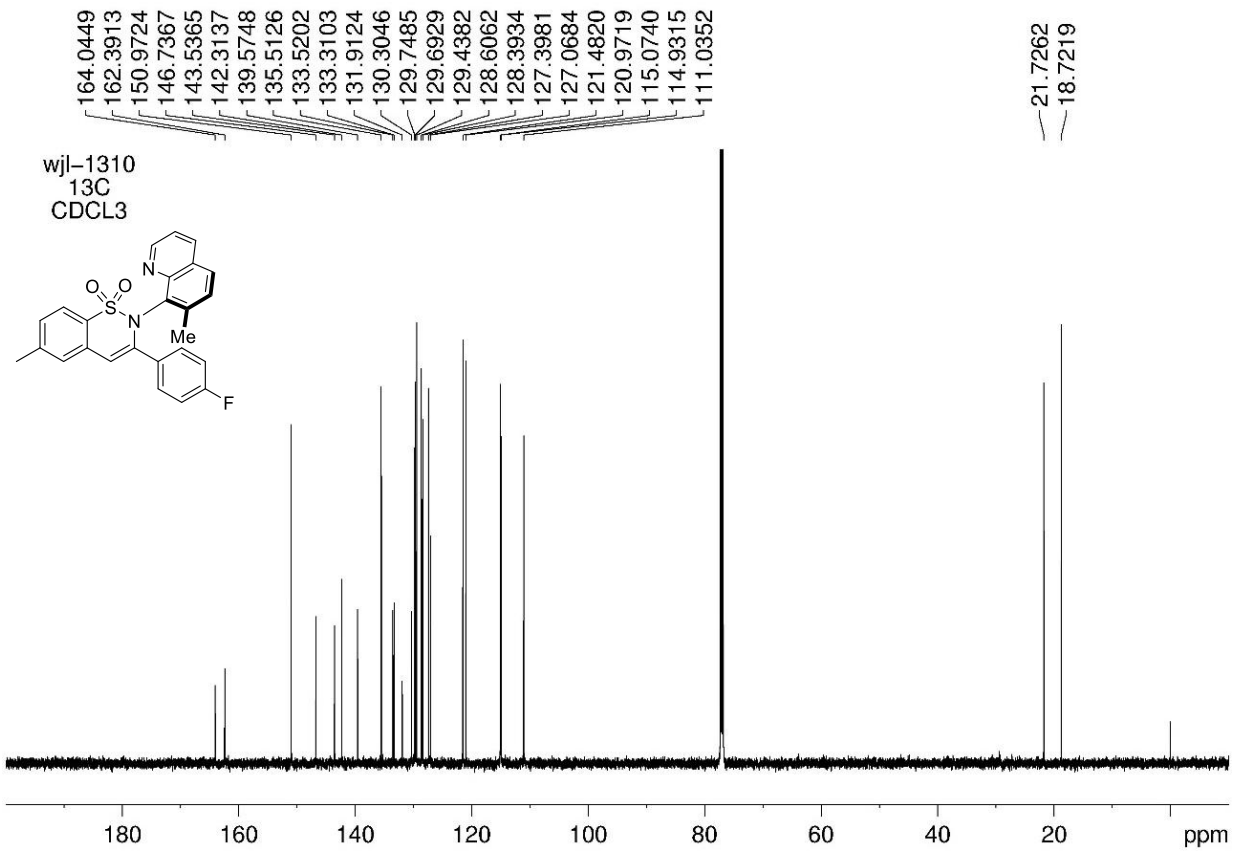

wjl-1310  
19F  
CDCl3

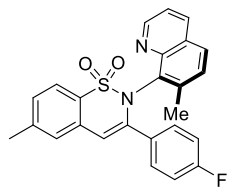

-111.5933

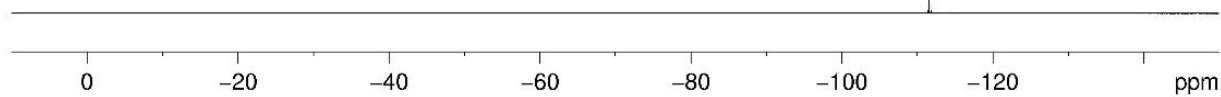

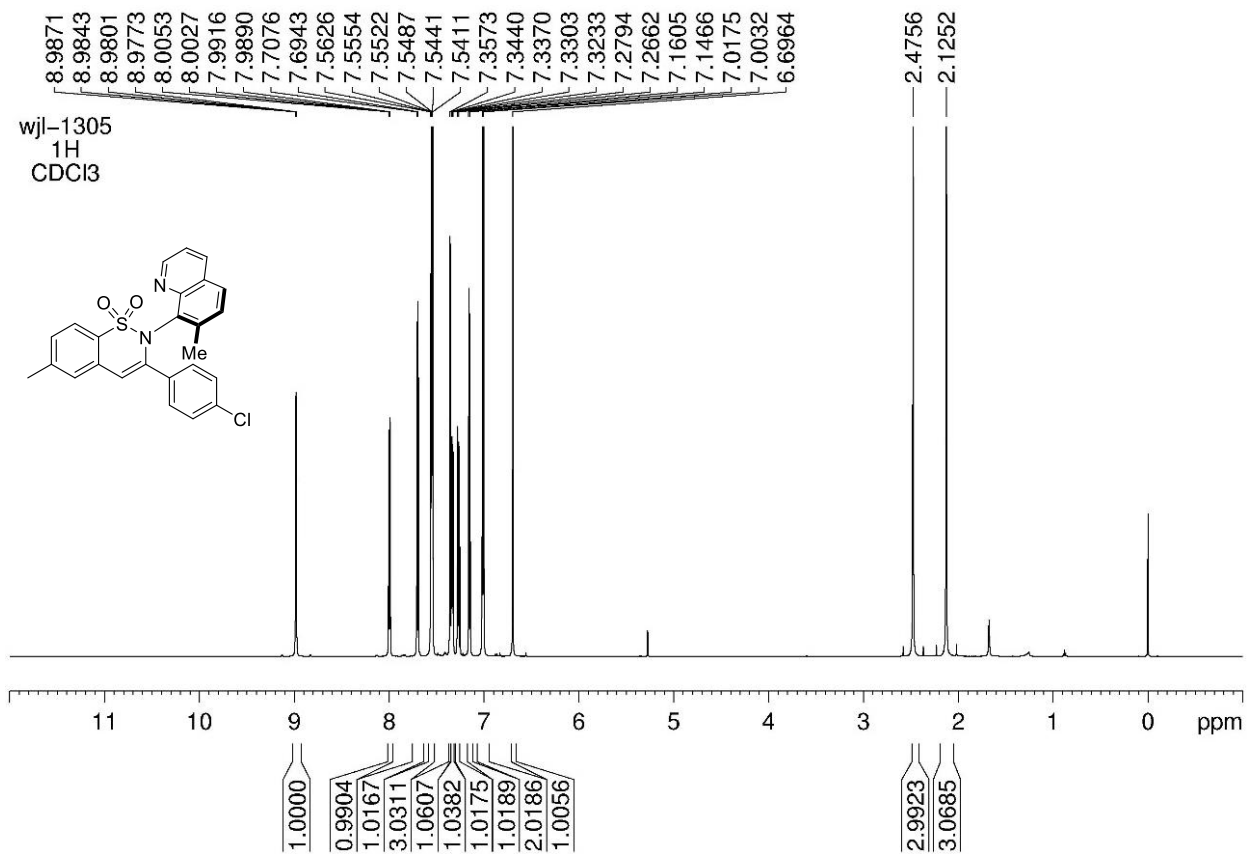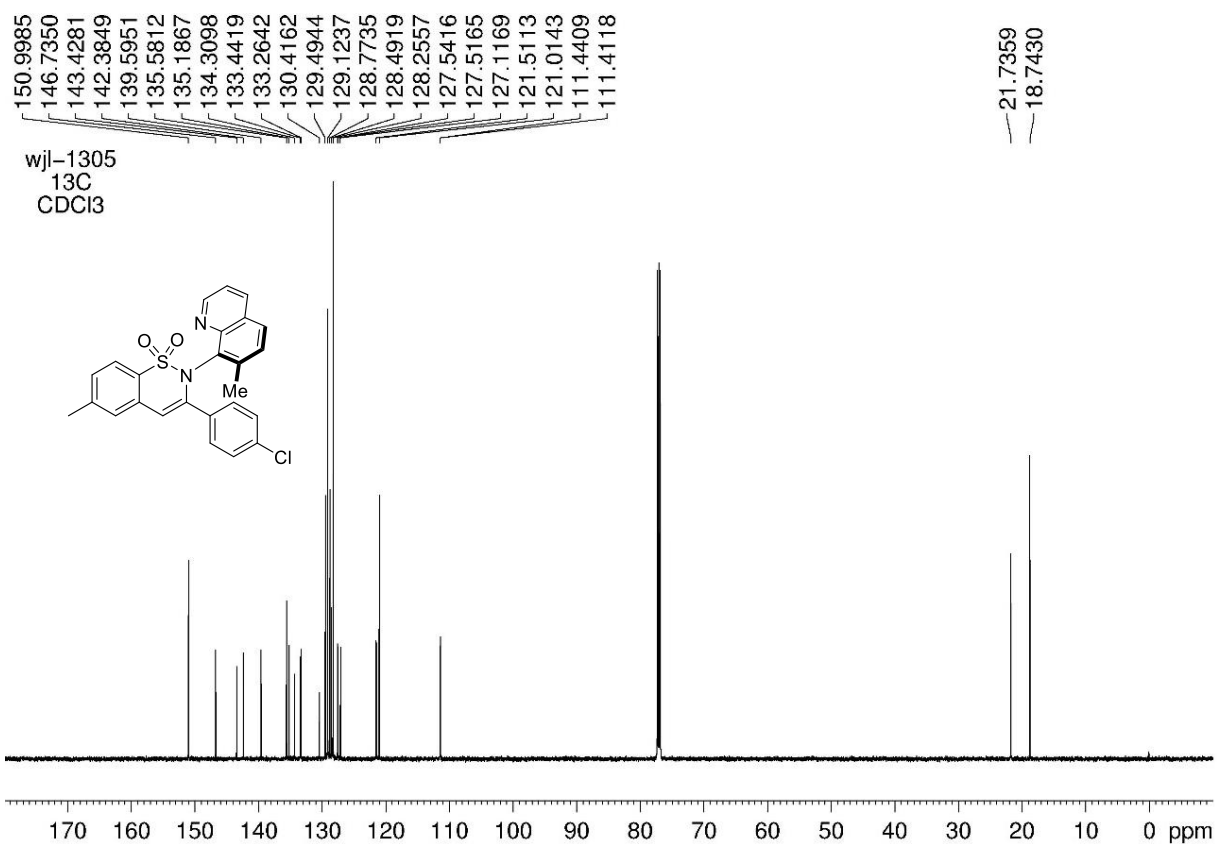

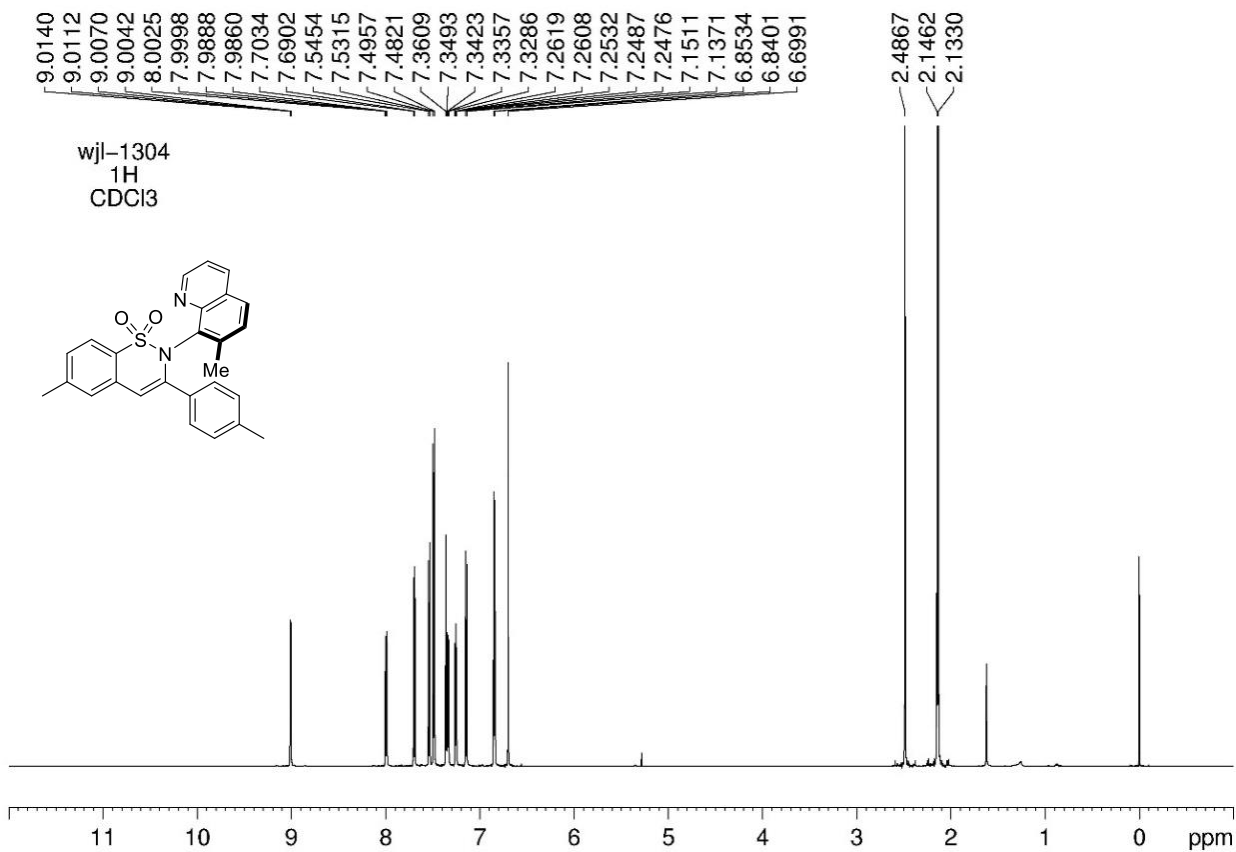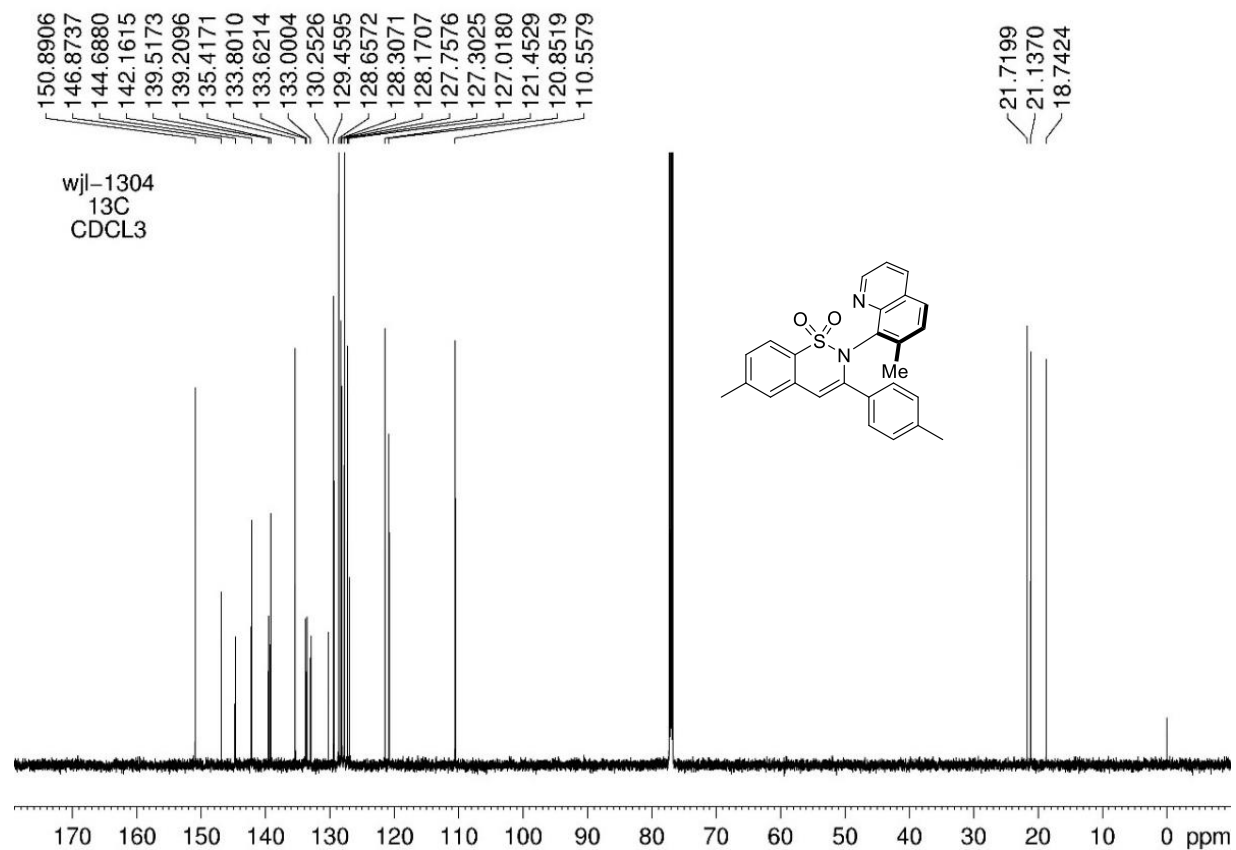



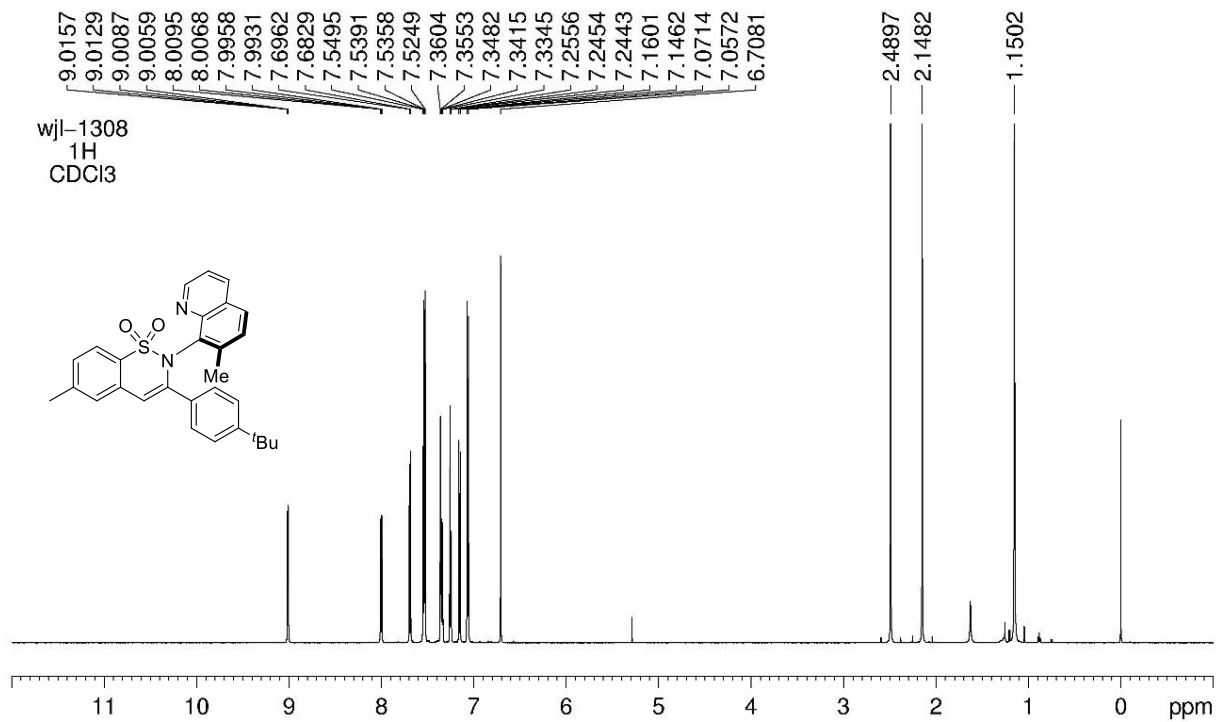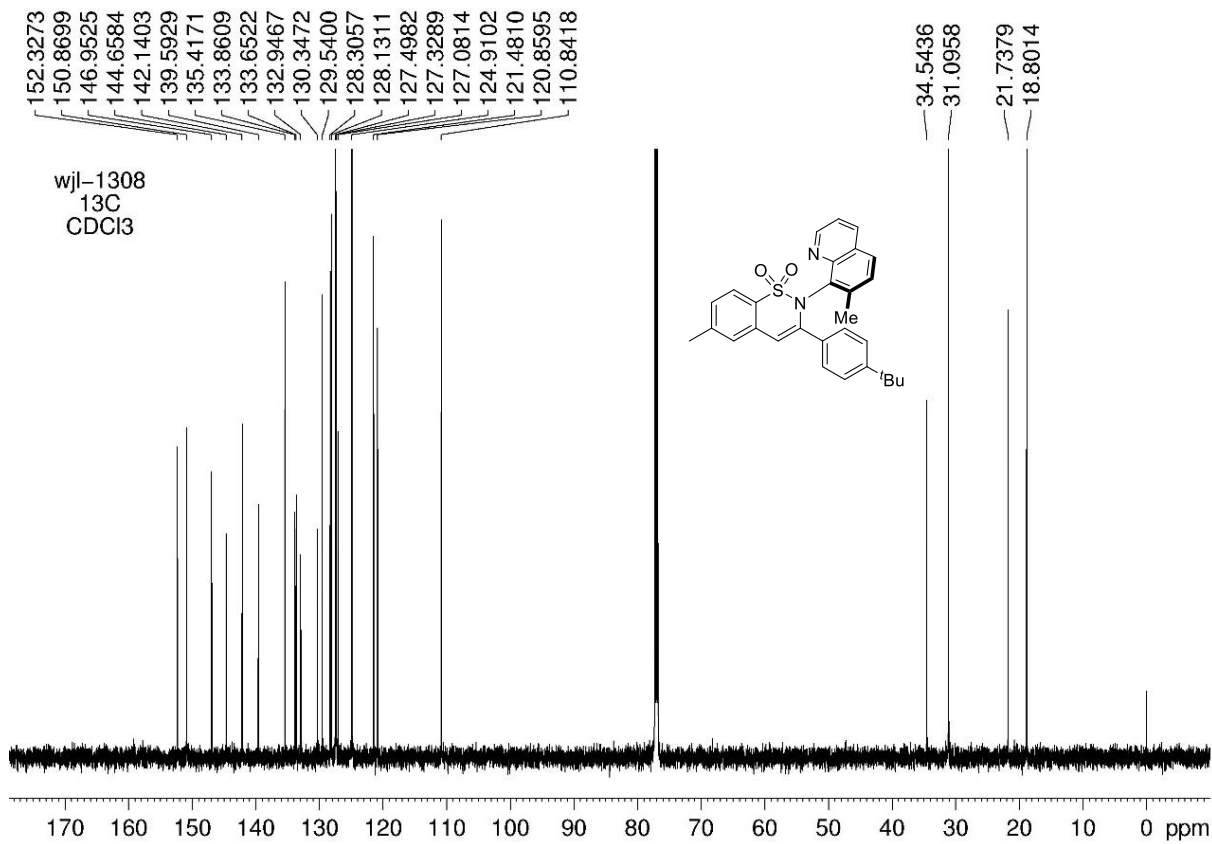

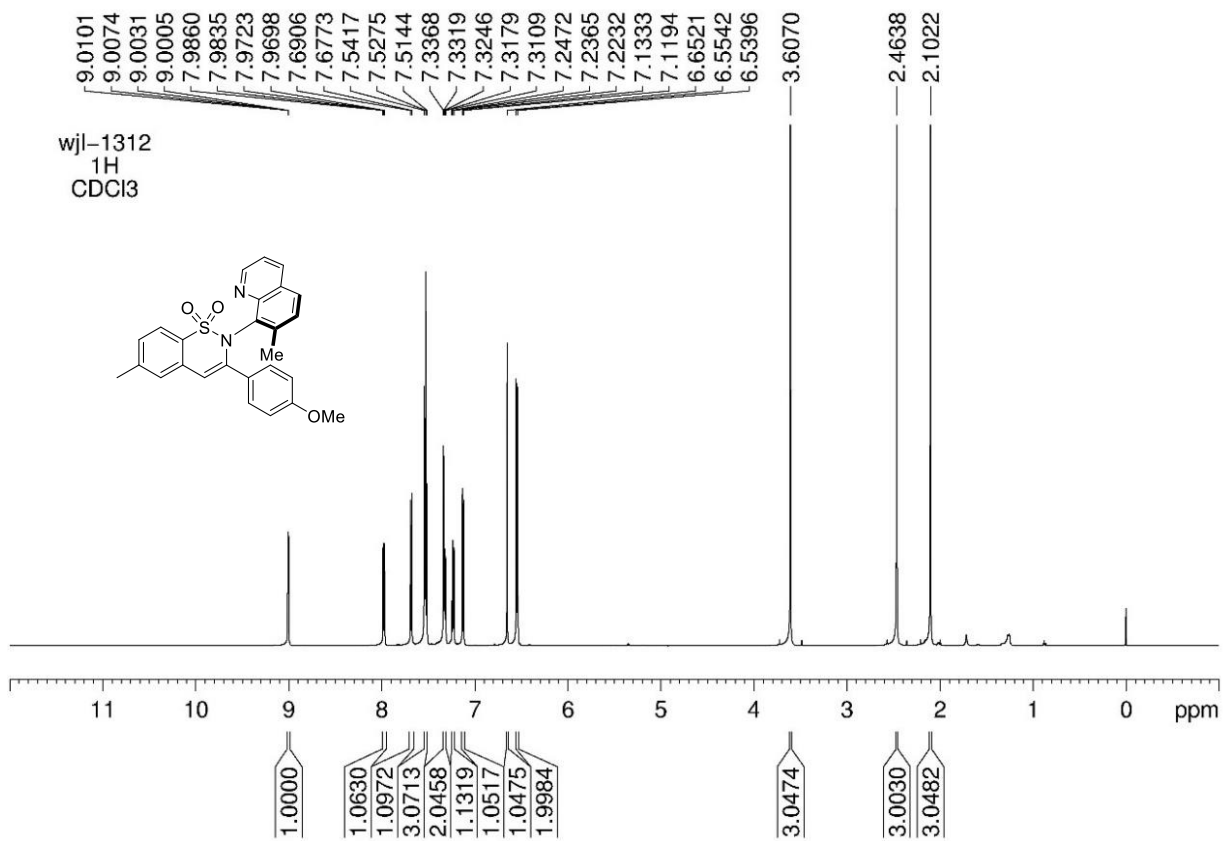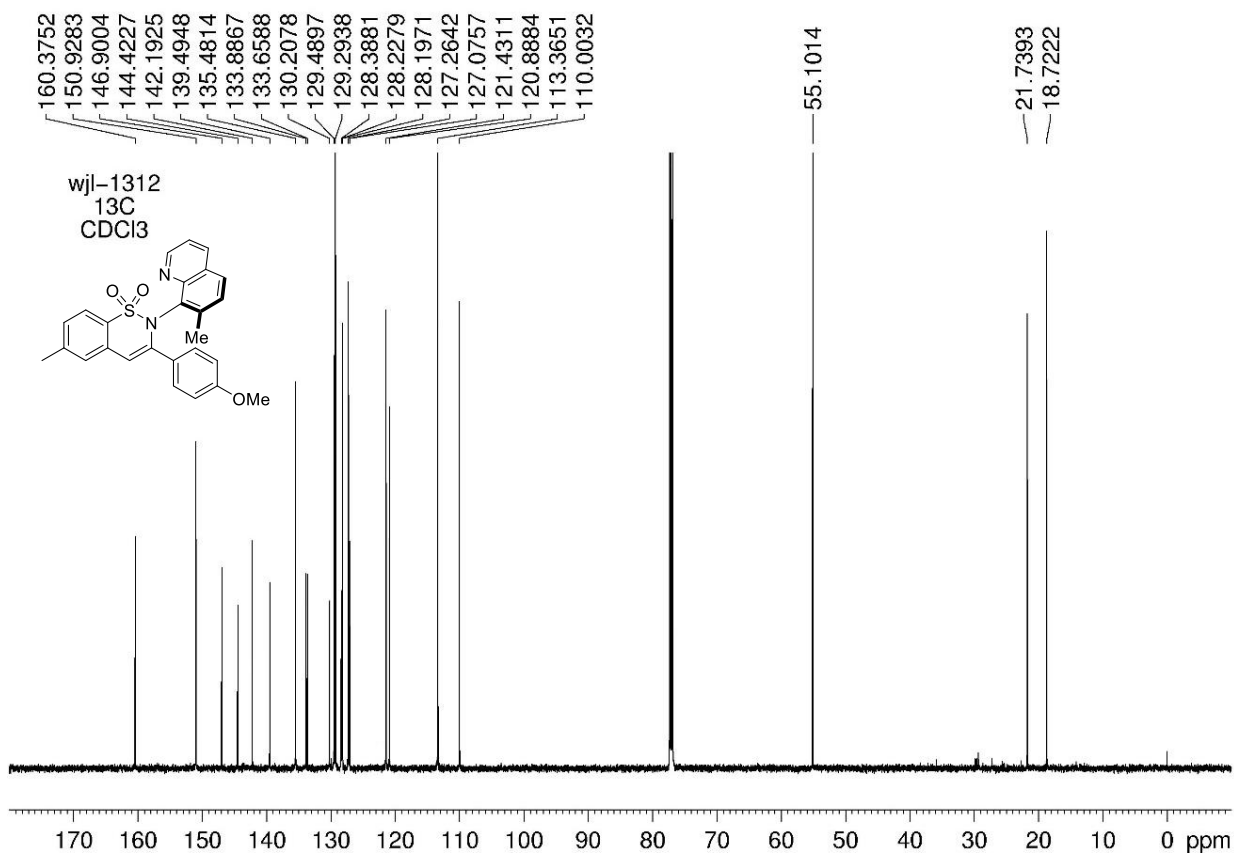

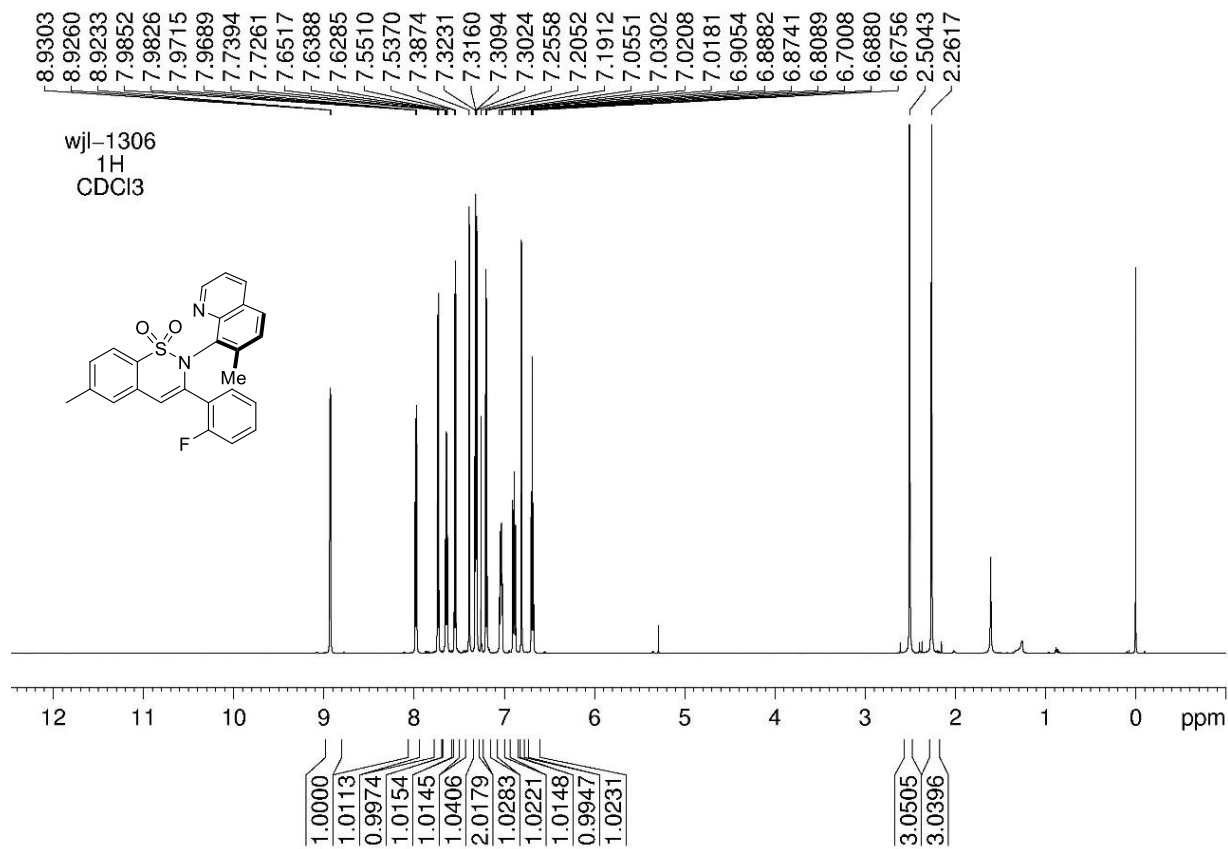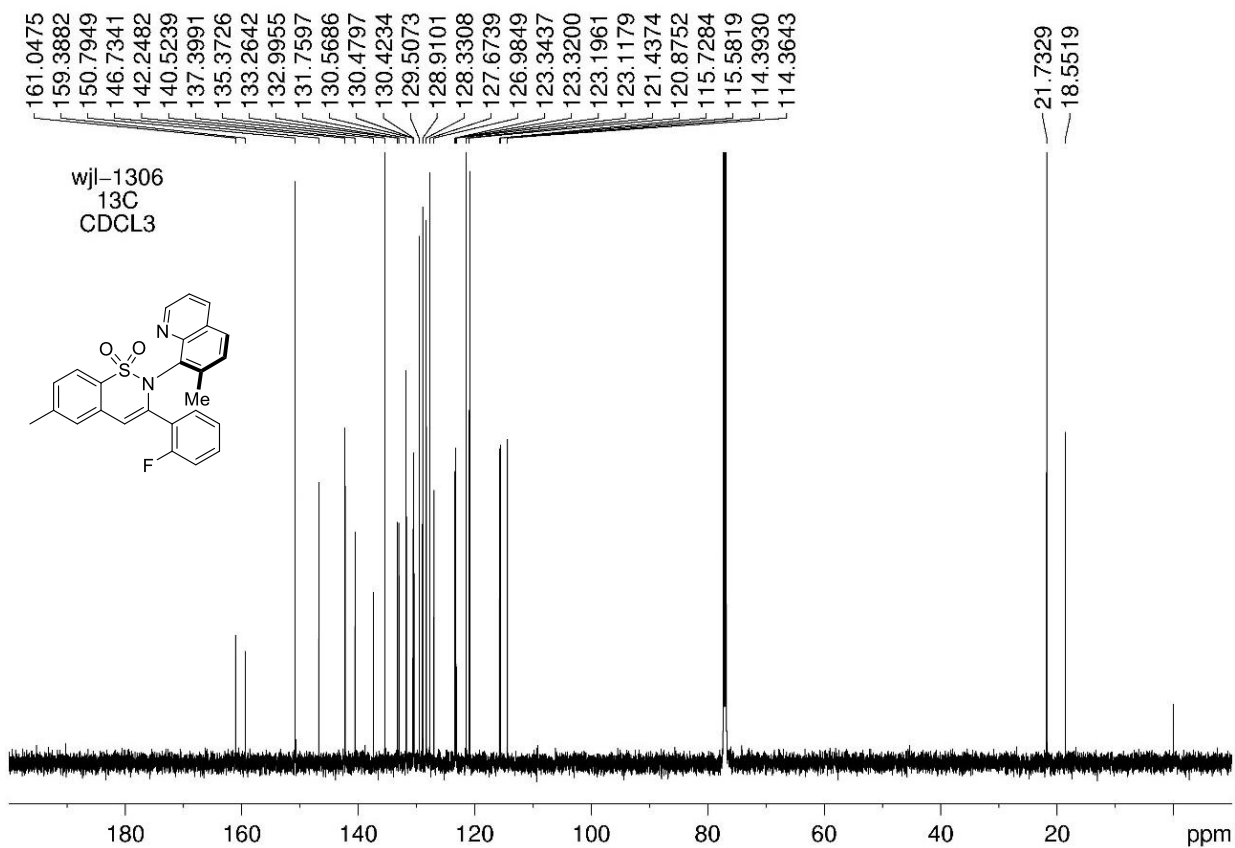

wj-1306  
19F  
CDCl3

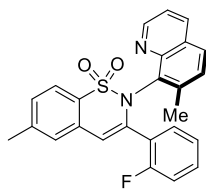

-116.4057

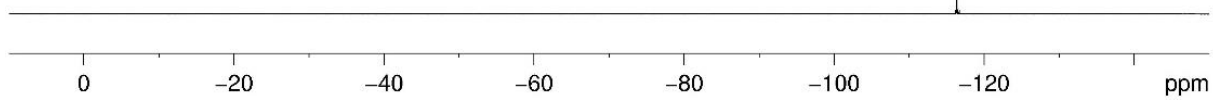

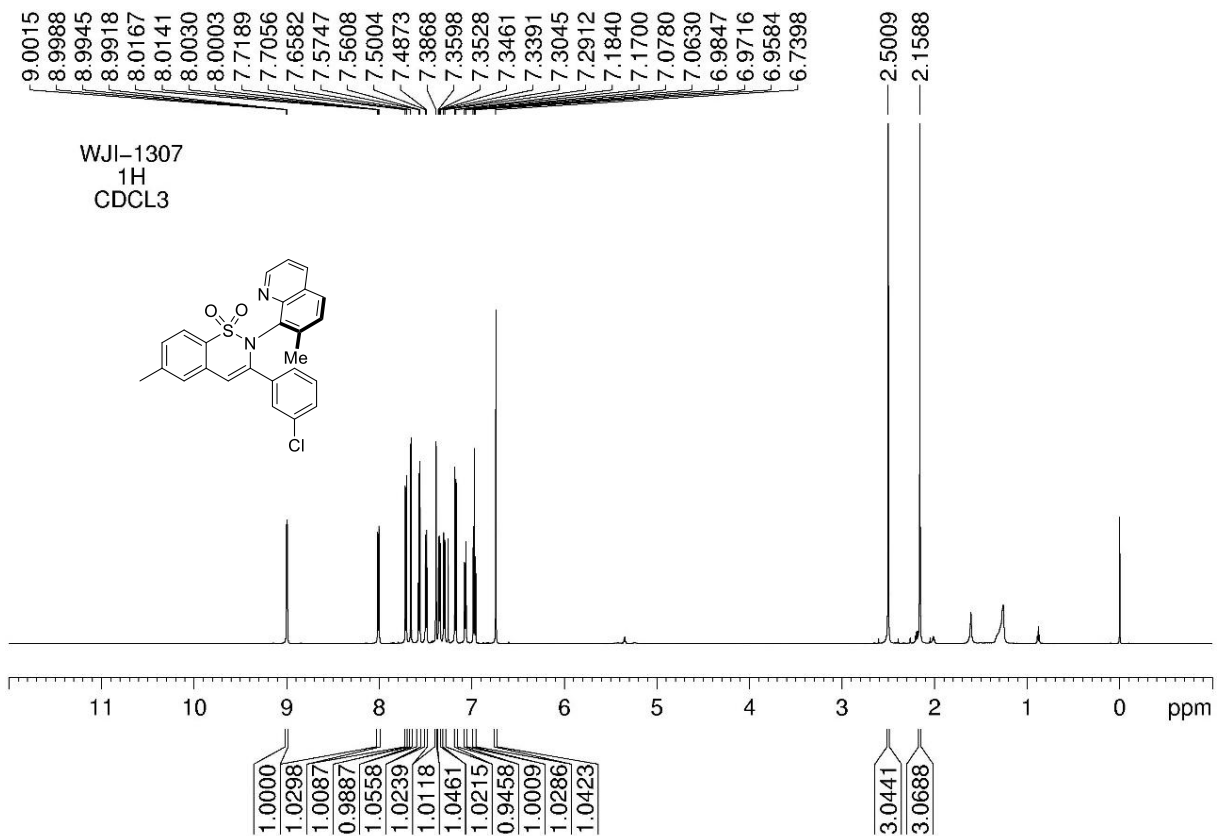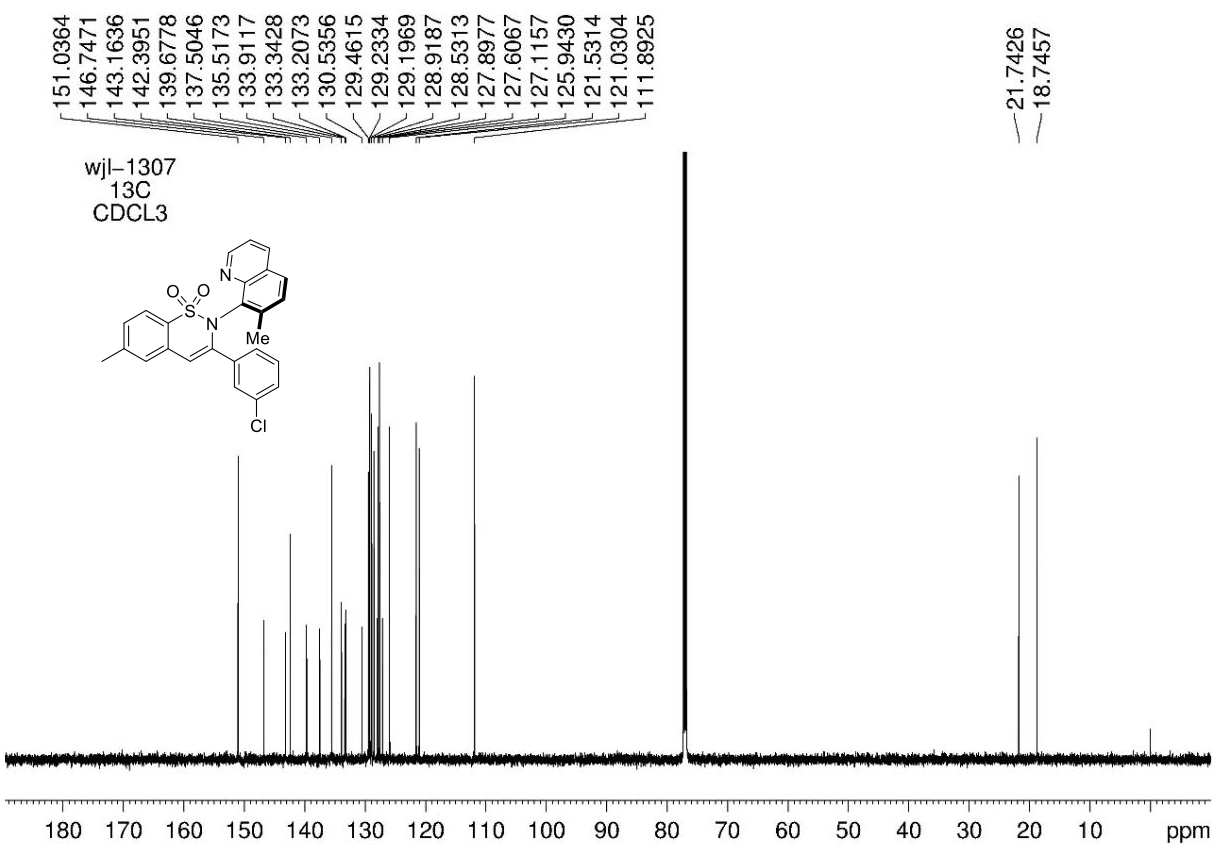

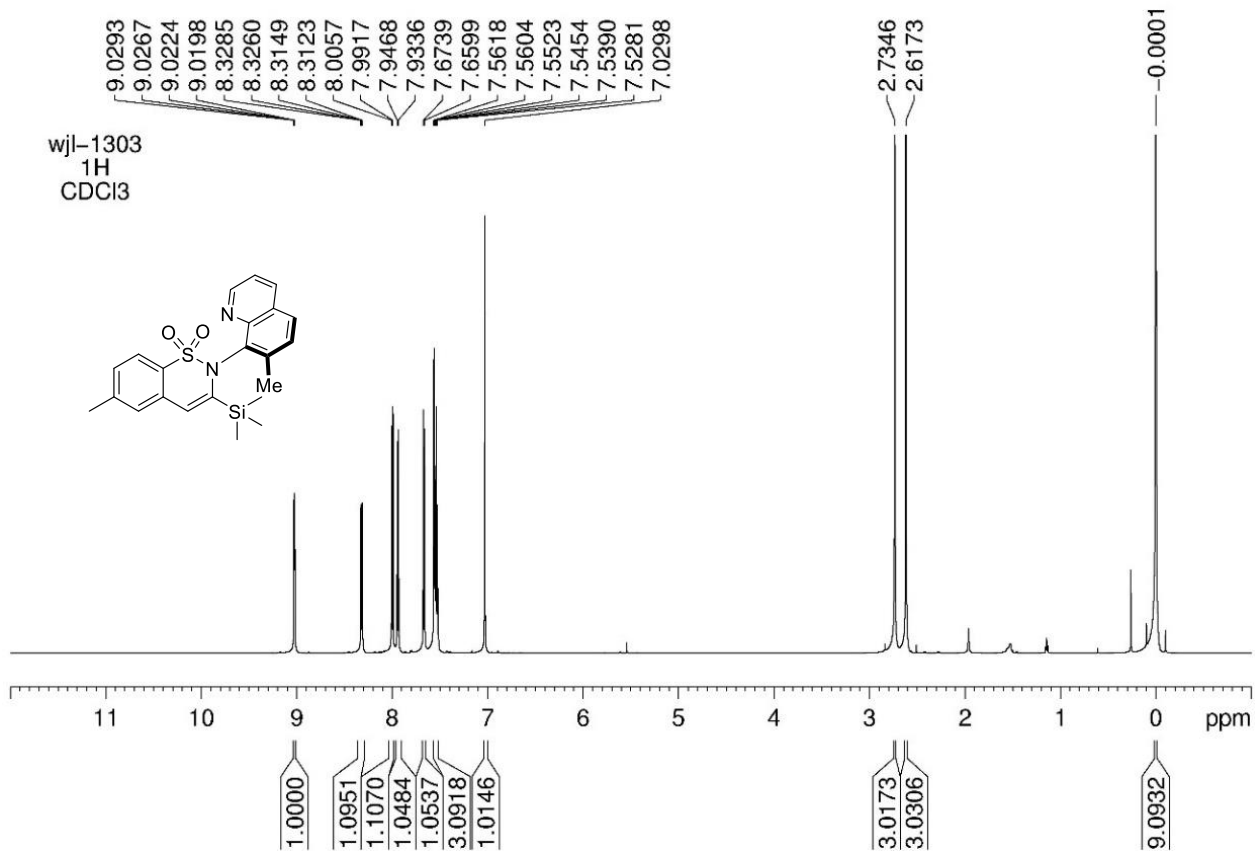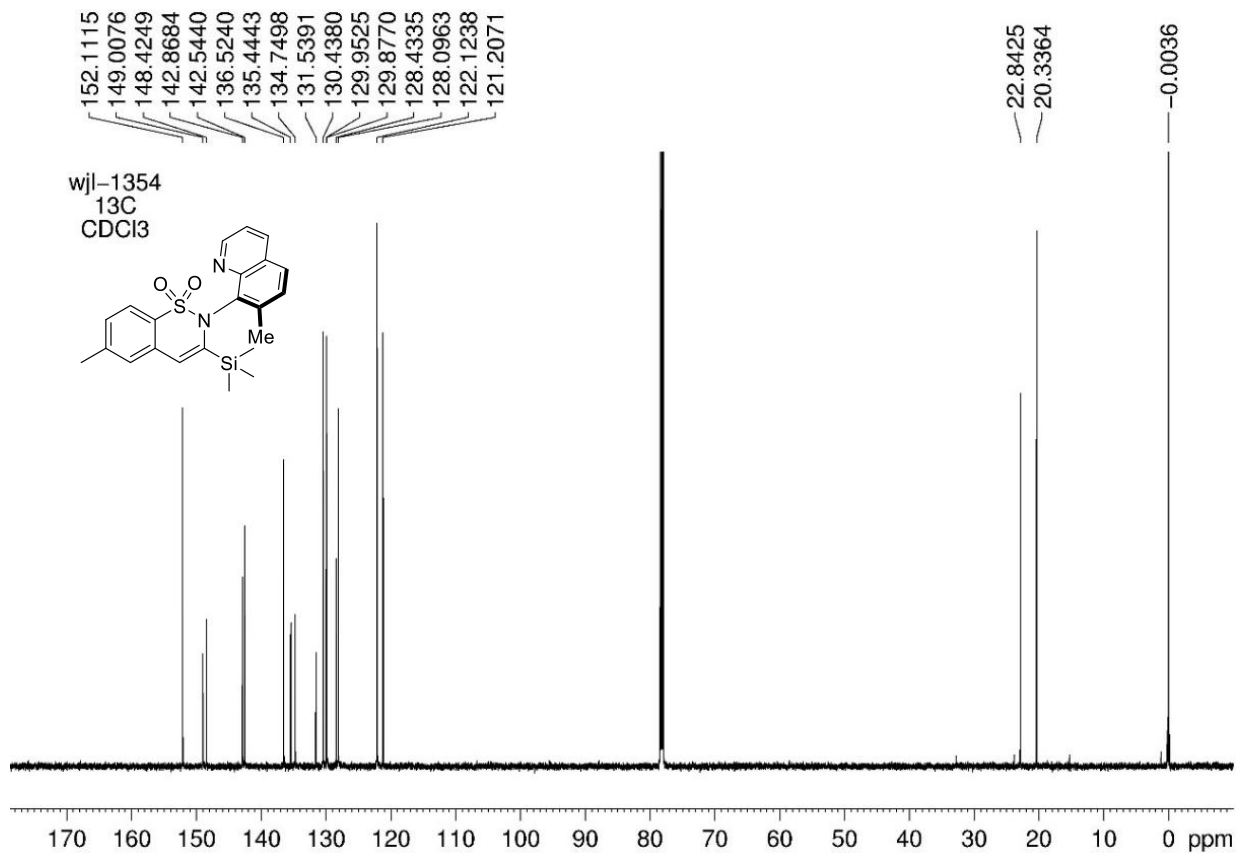

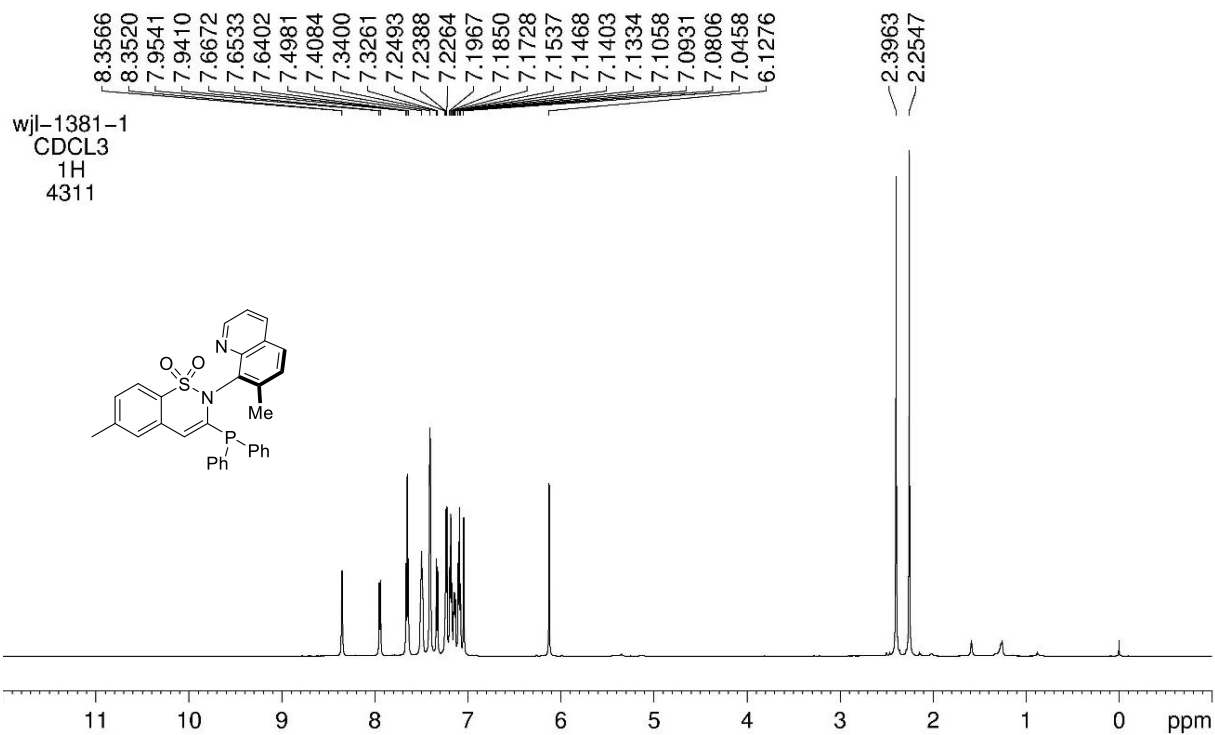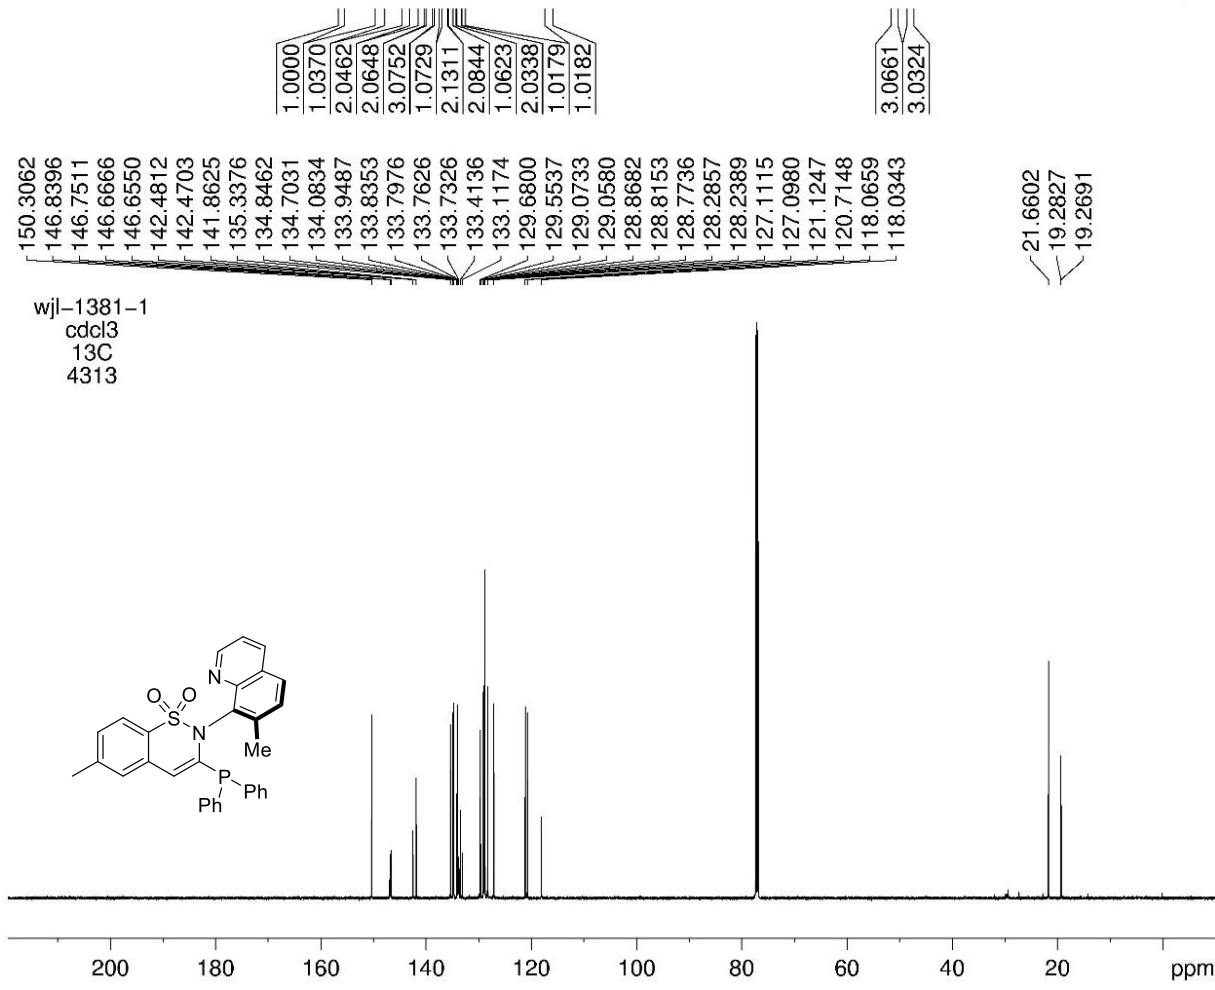

wjl-1381  
P31  
CDCl3

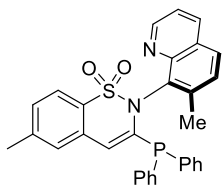

—7.9143

100 50 0 -50 -100 -150 -200 ppm



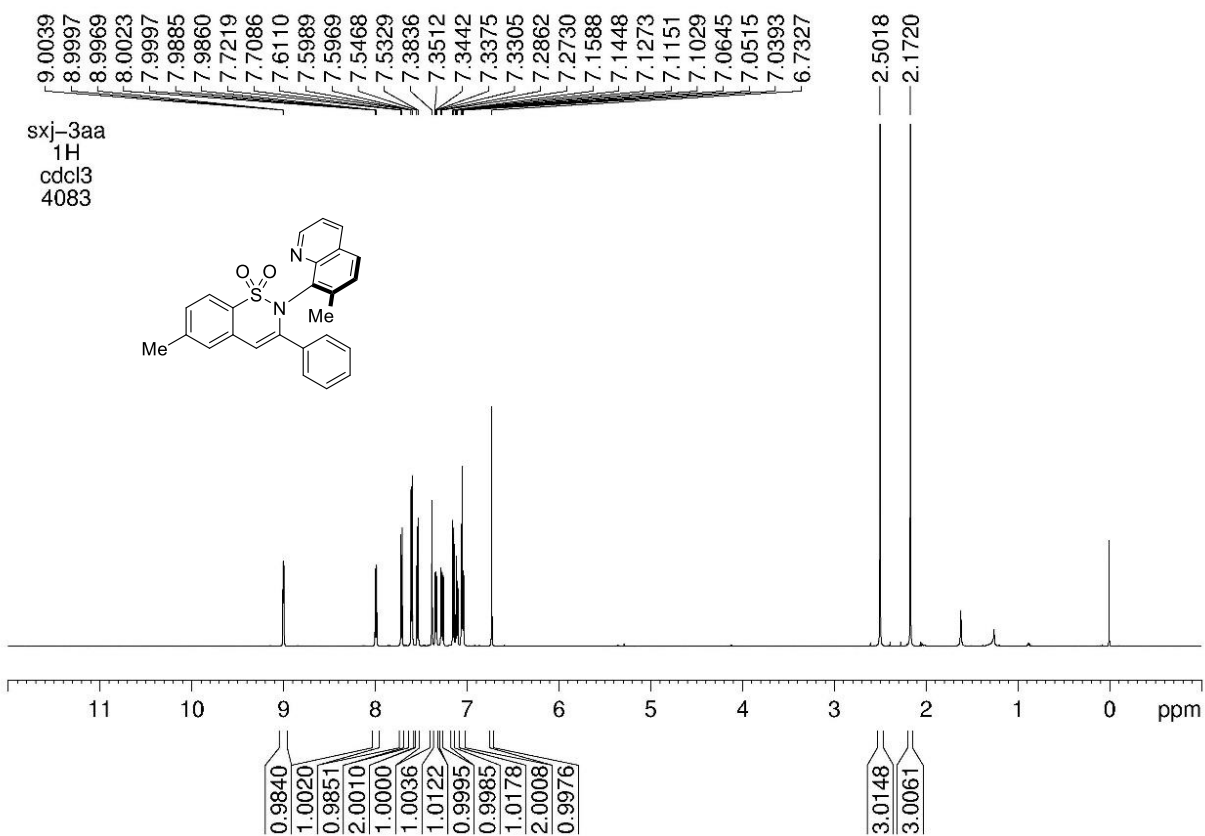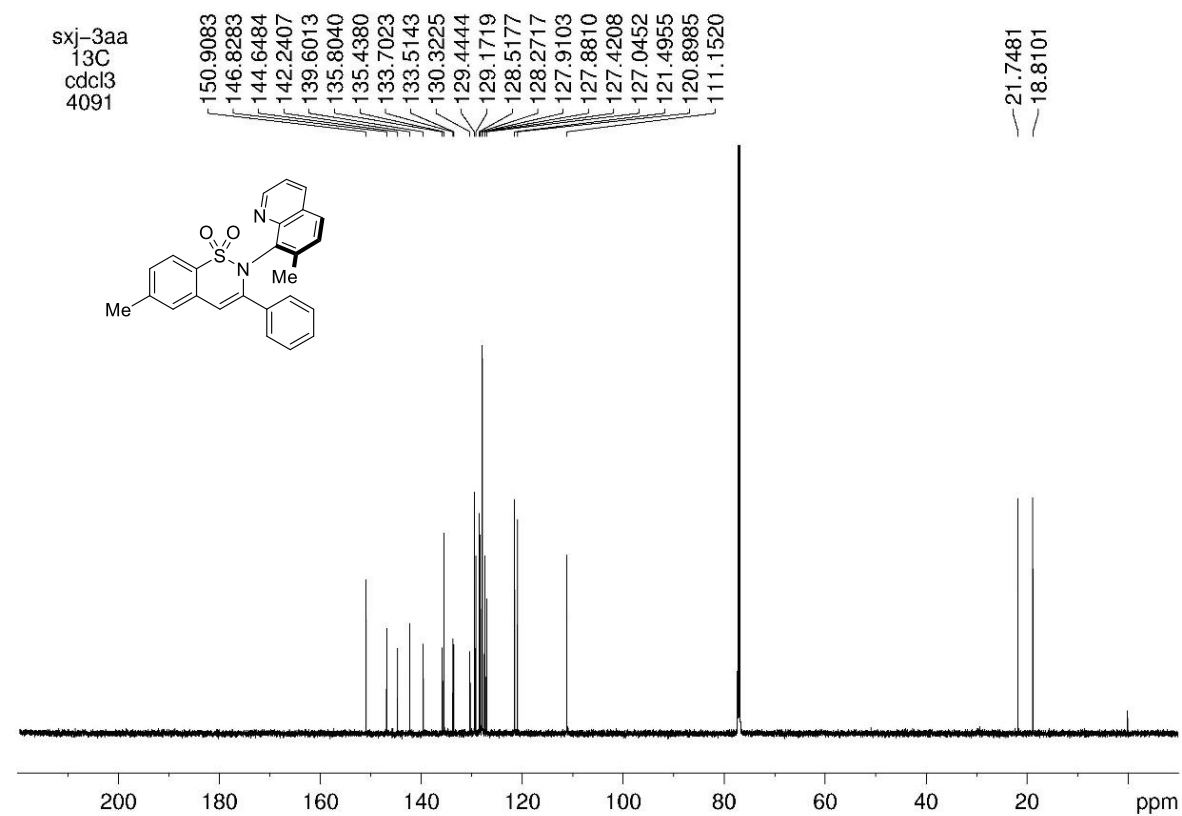

sjj-3289  
1H  
CDCl3  
4198

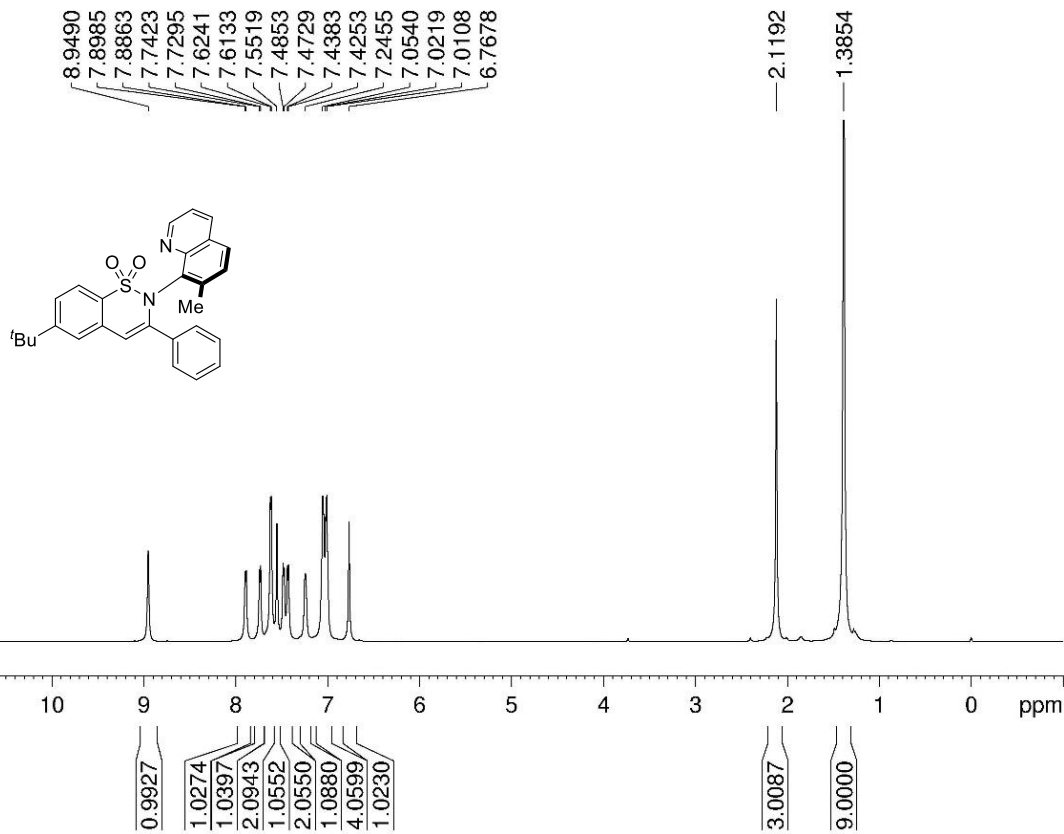

sjj-3289  
13C  
CDCl3  
4206

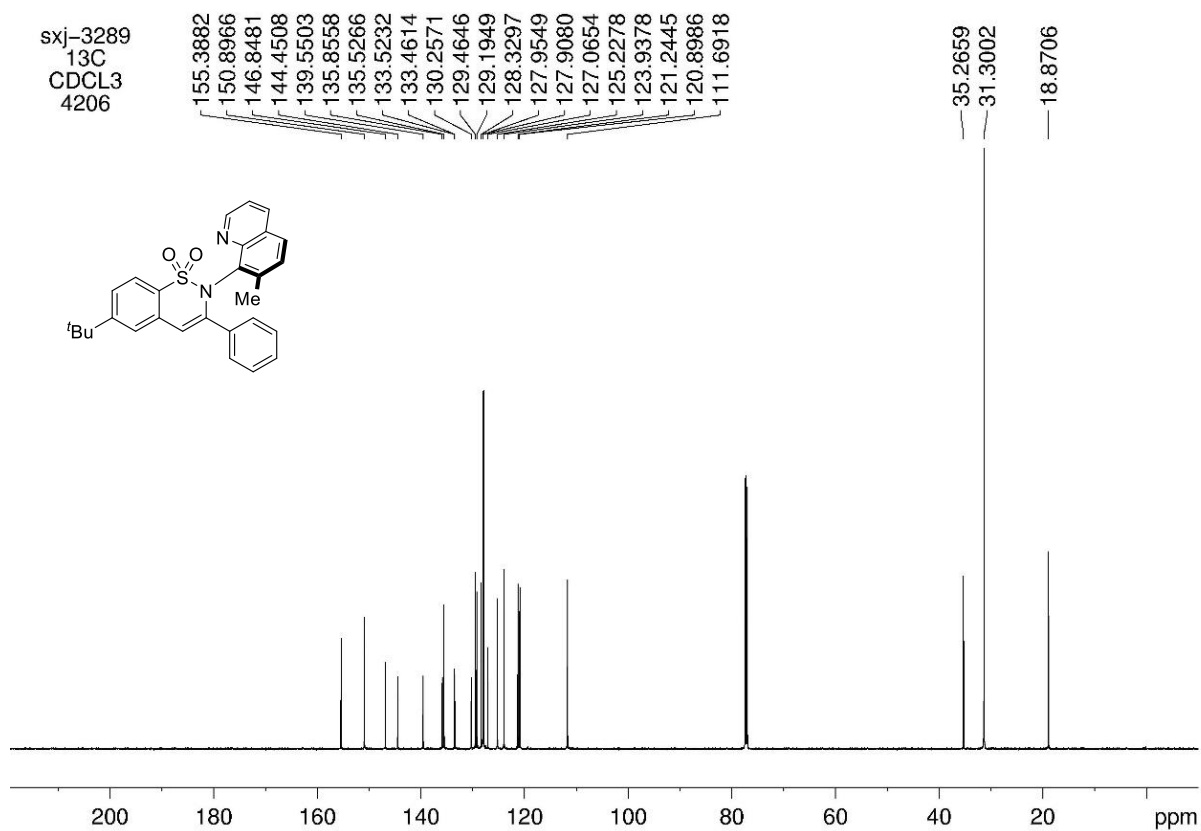

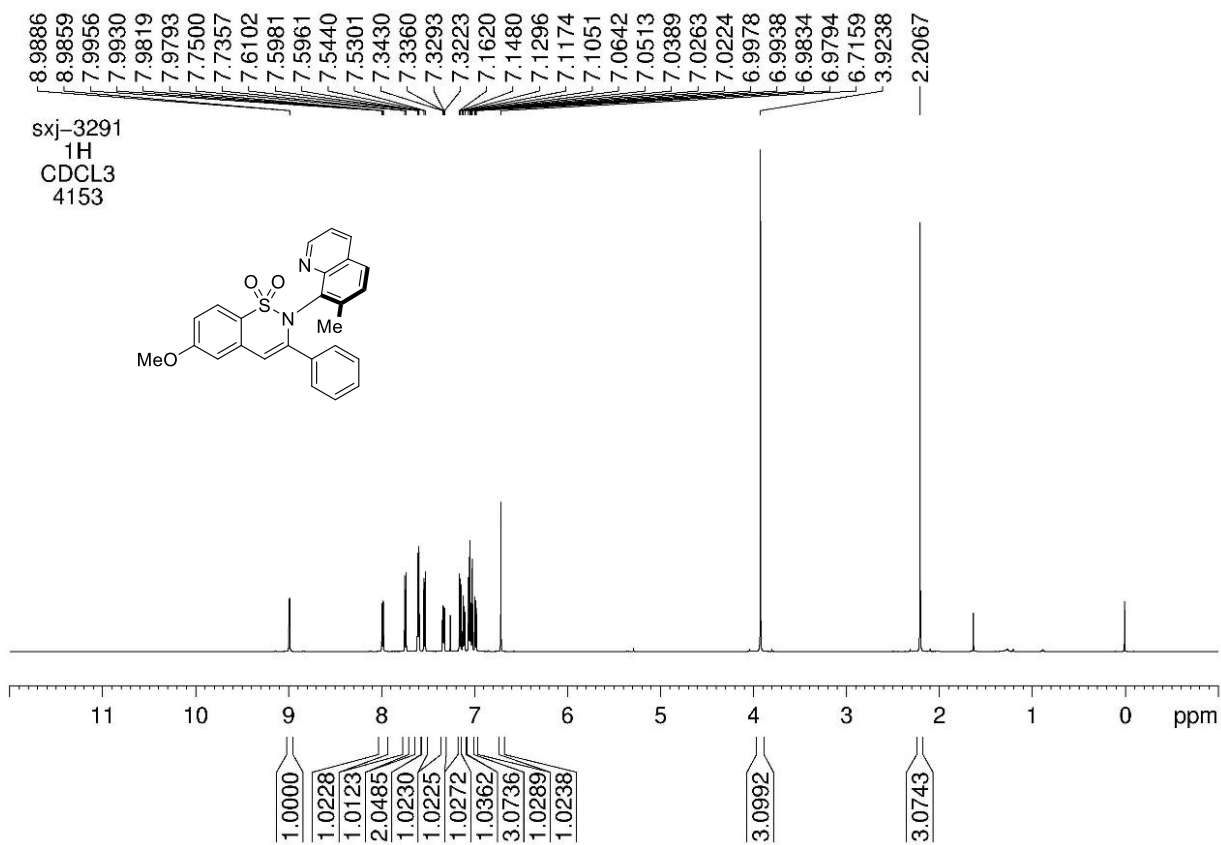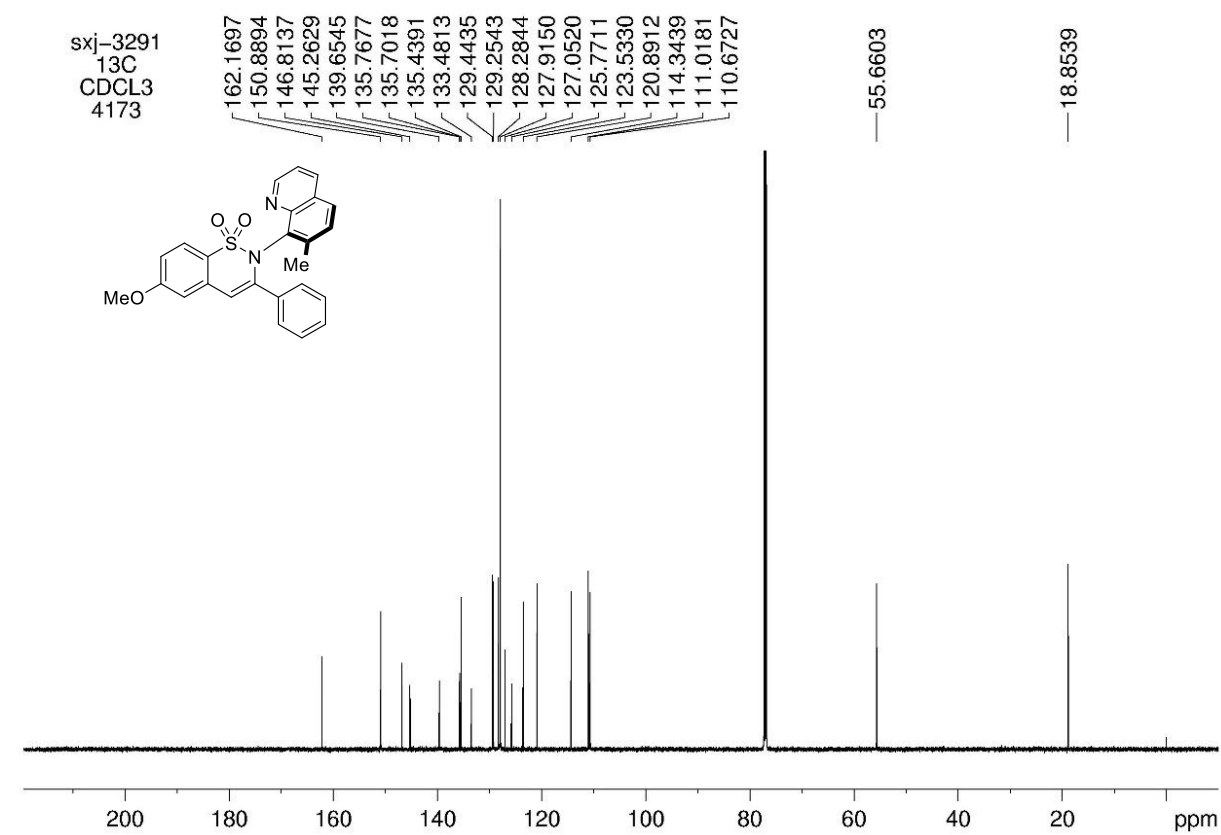

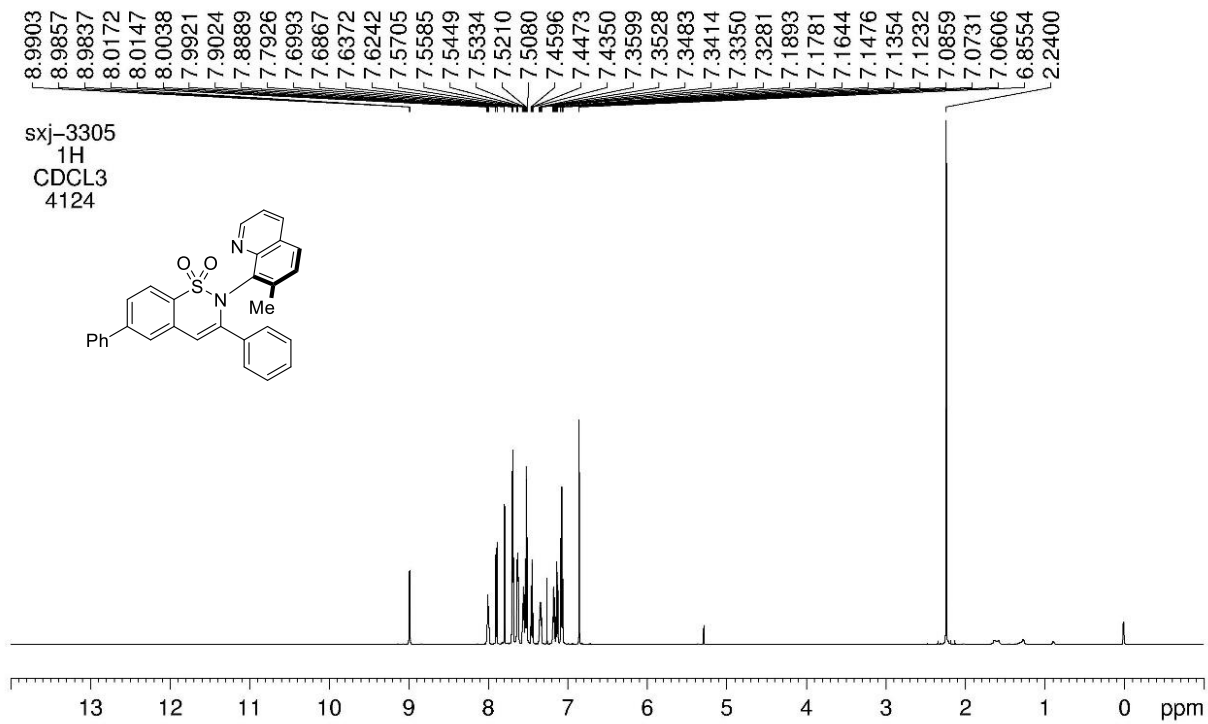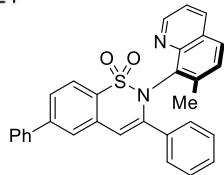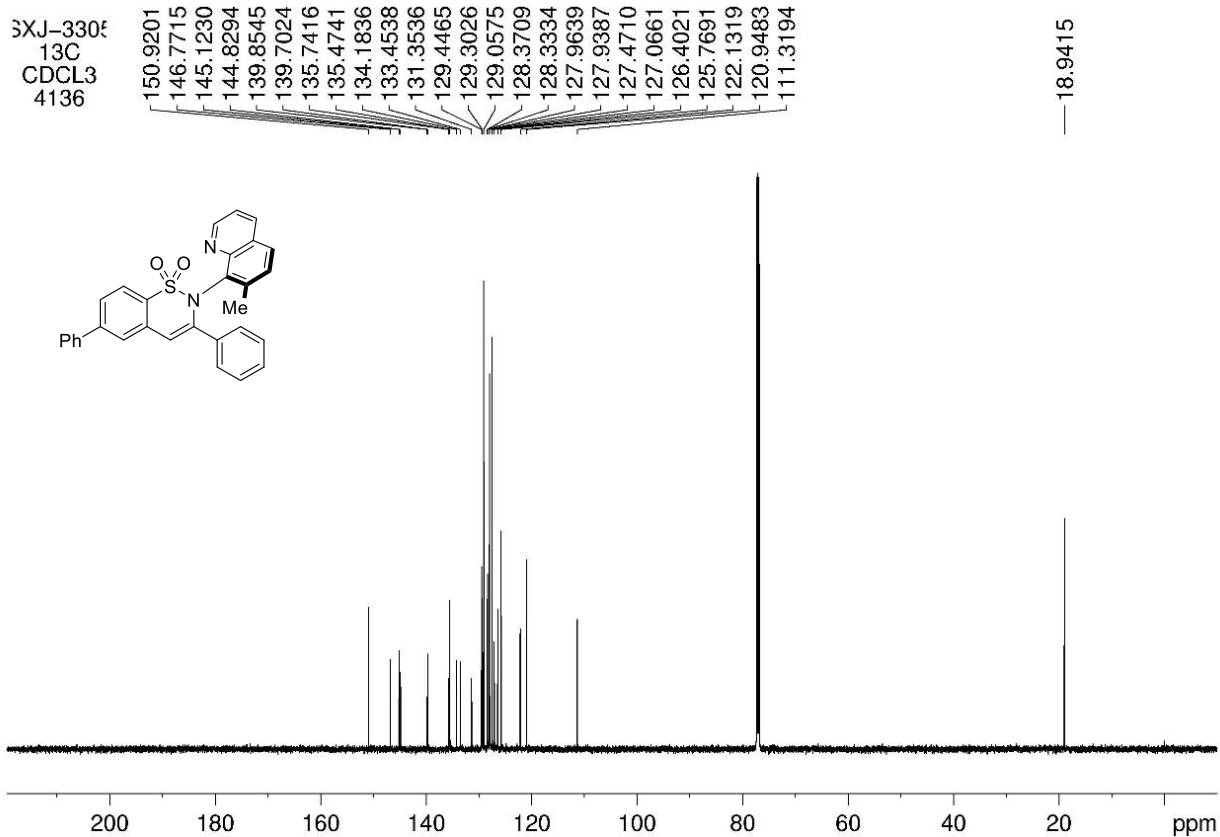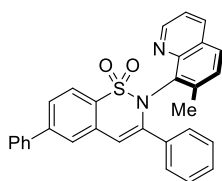

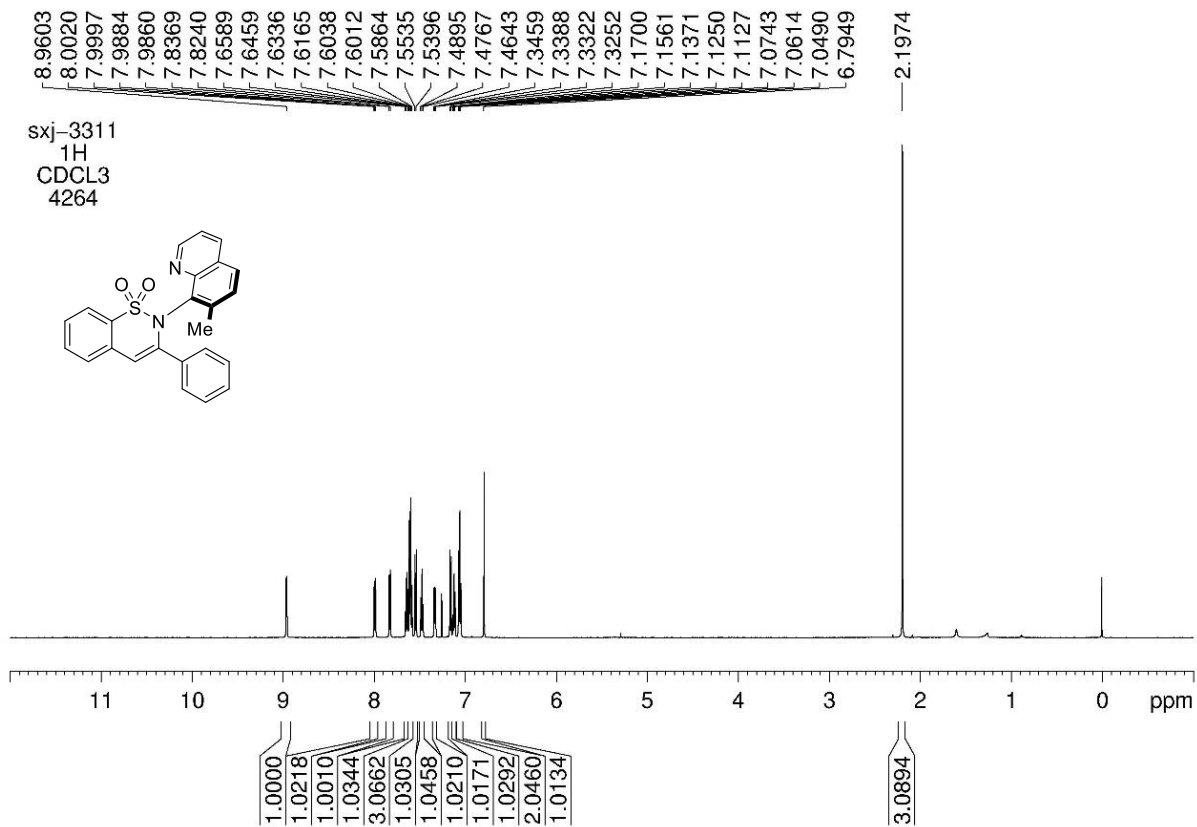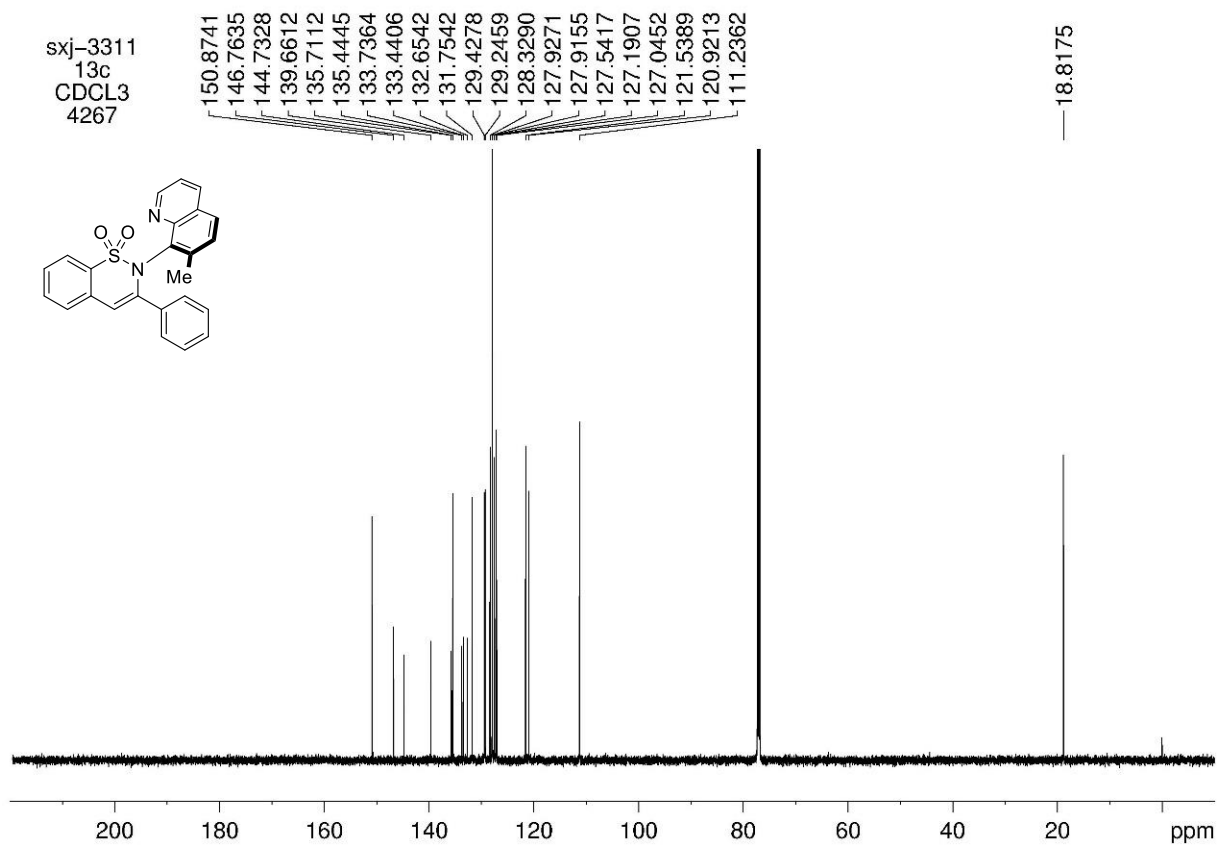

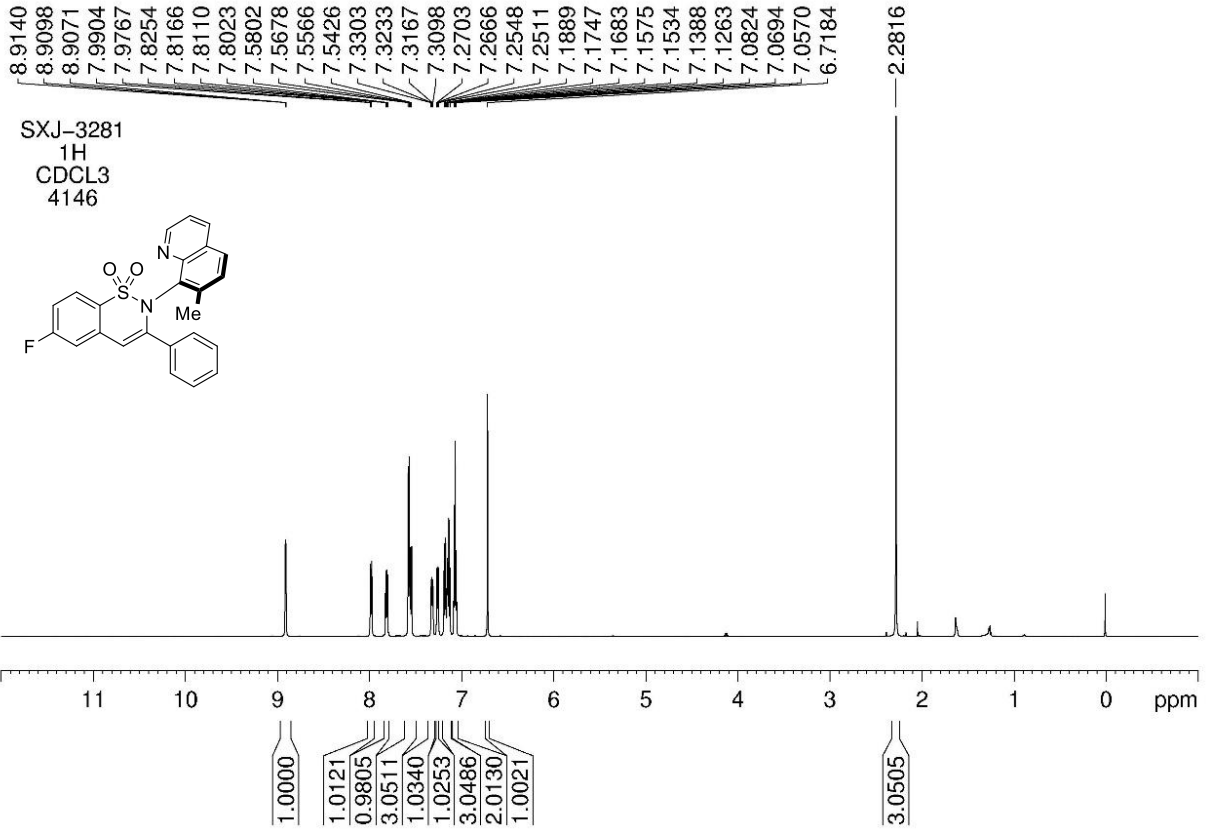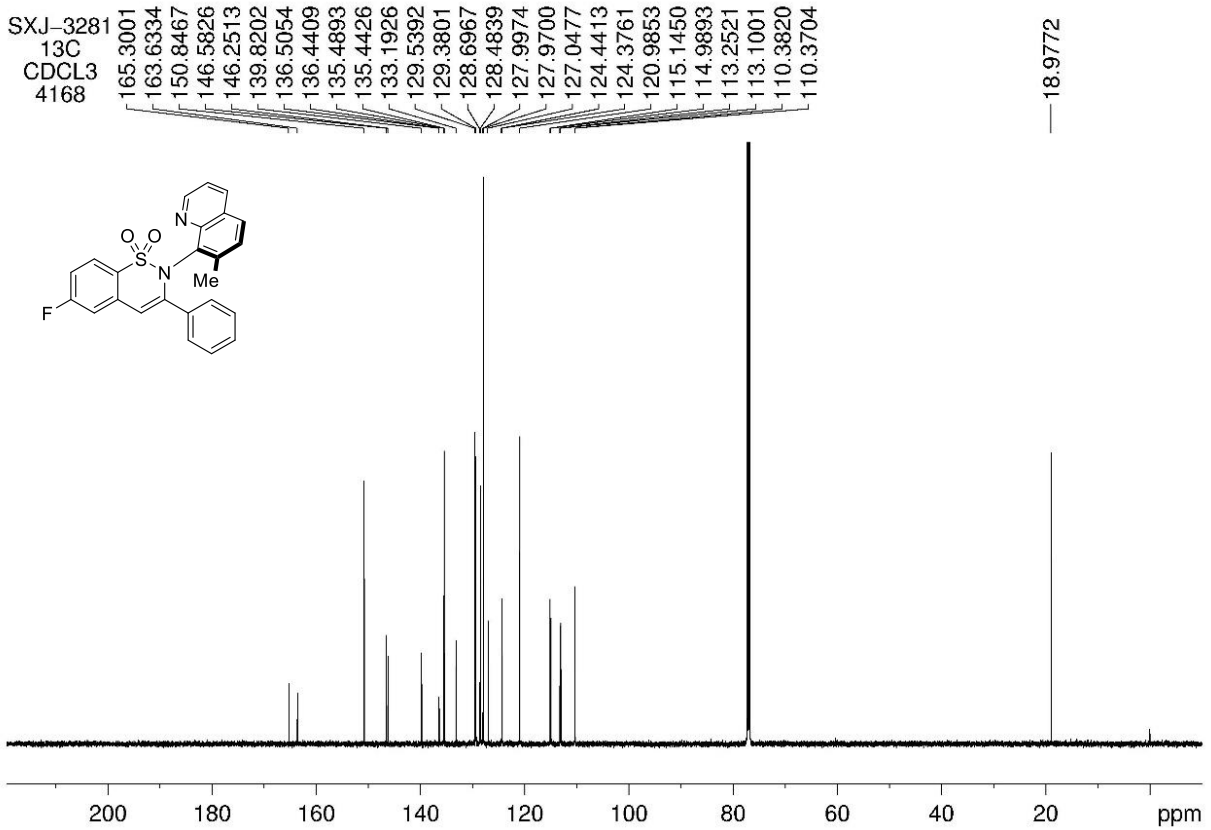

SXJ-3281  
19F  
CDCL3  
4147

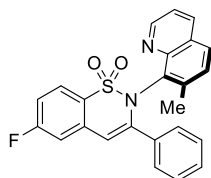

-106.9176

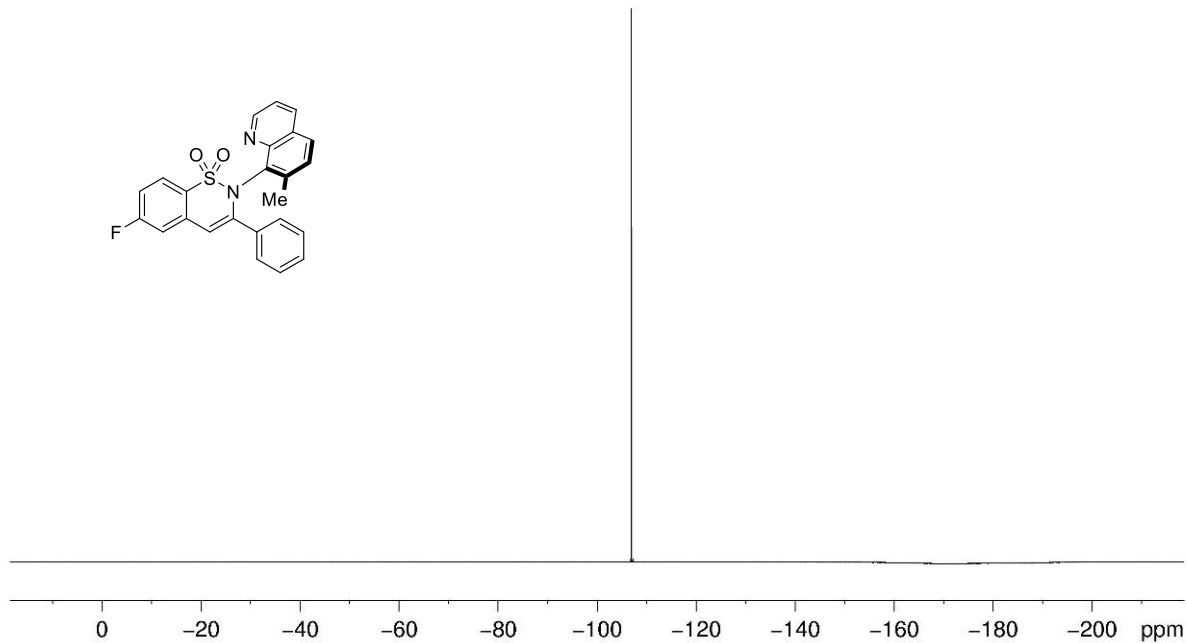

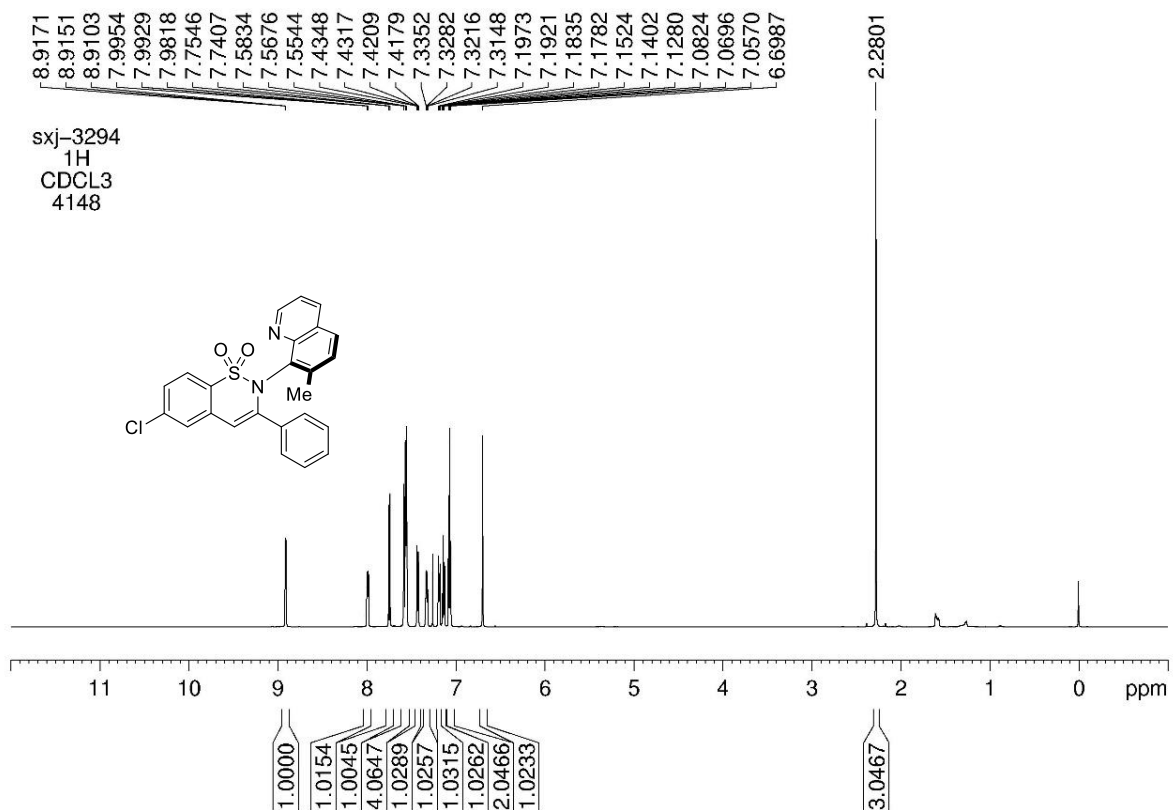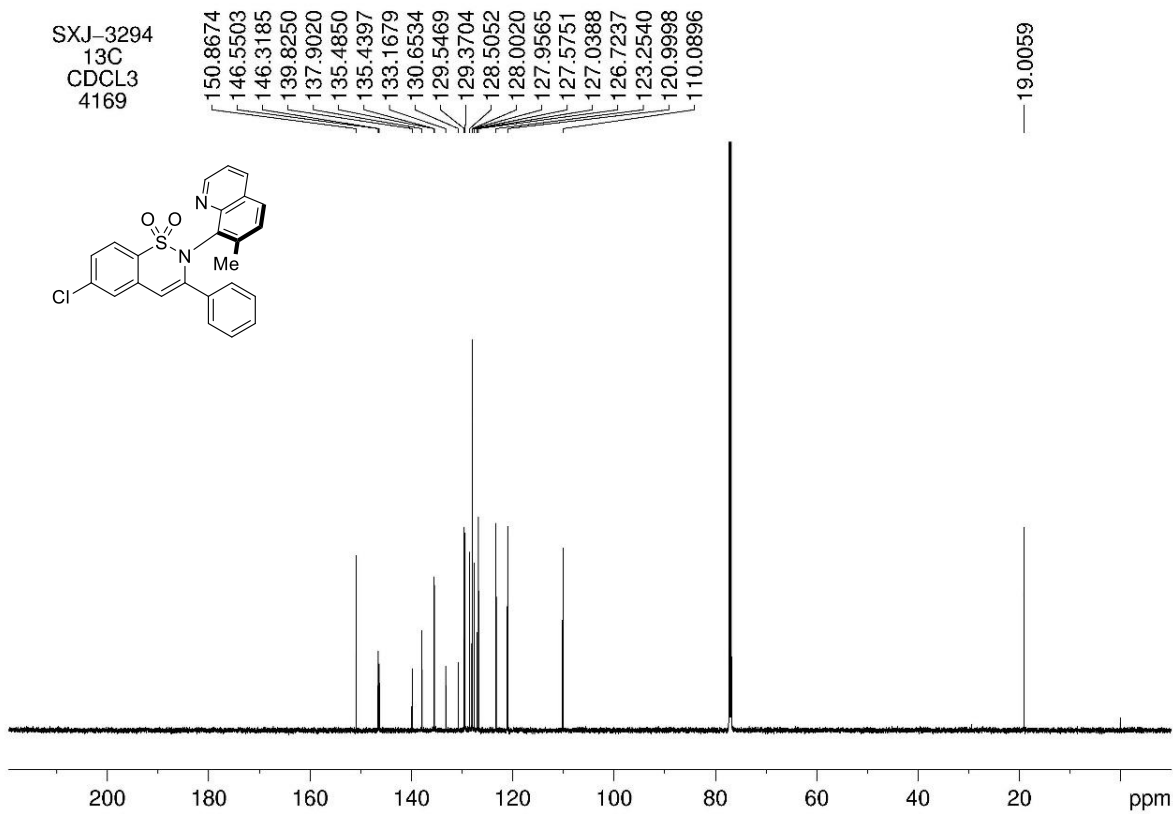



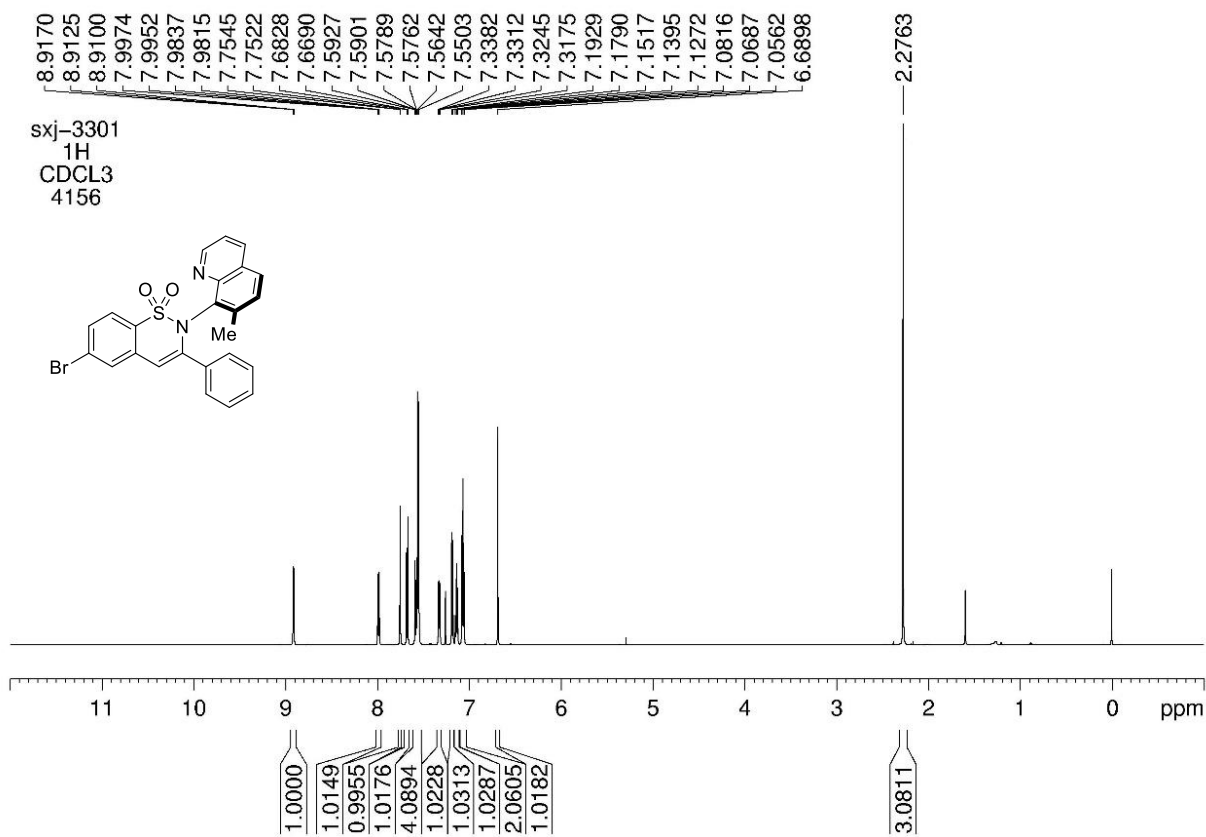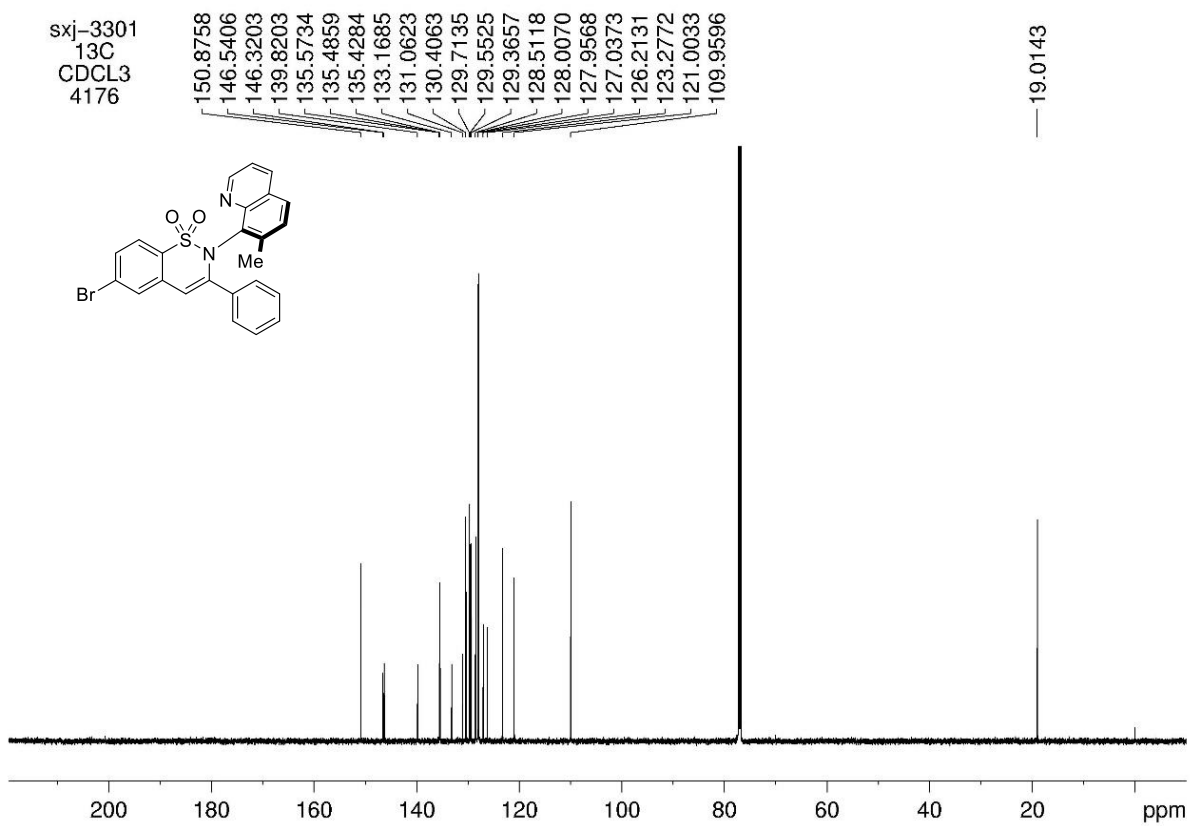

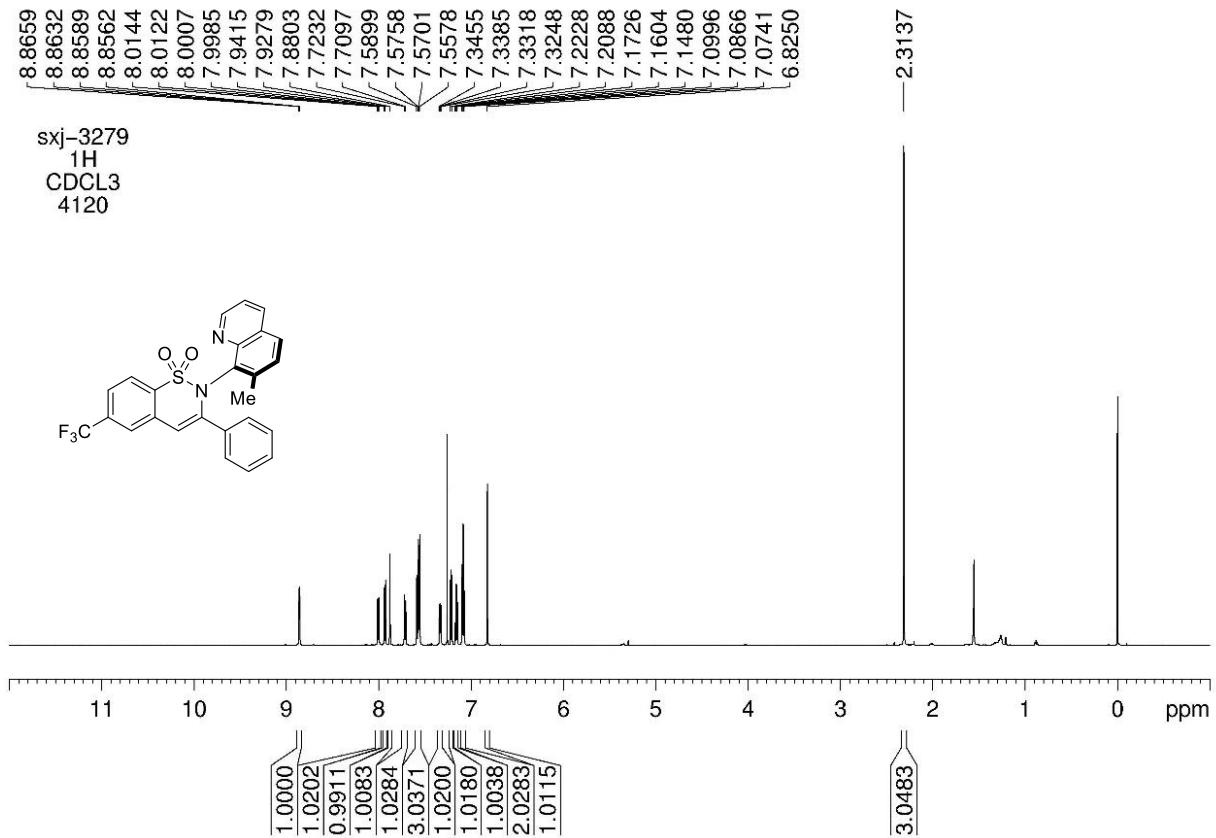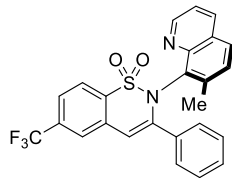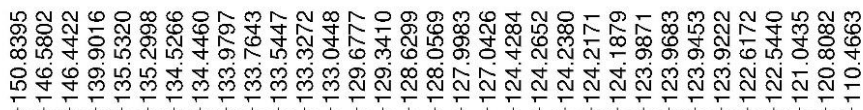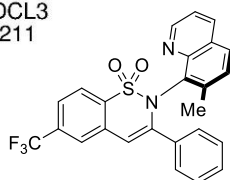

sxj-3279  
19F  
CDCL3  
4121

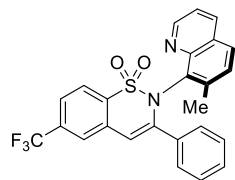

-62.8060

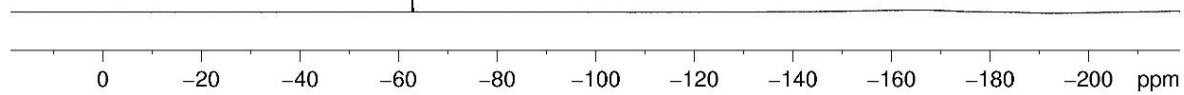

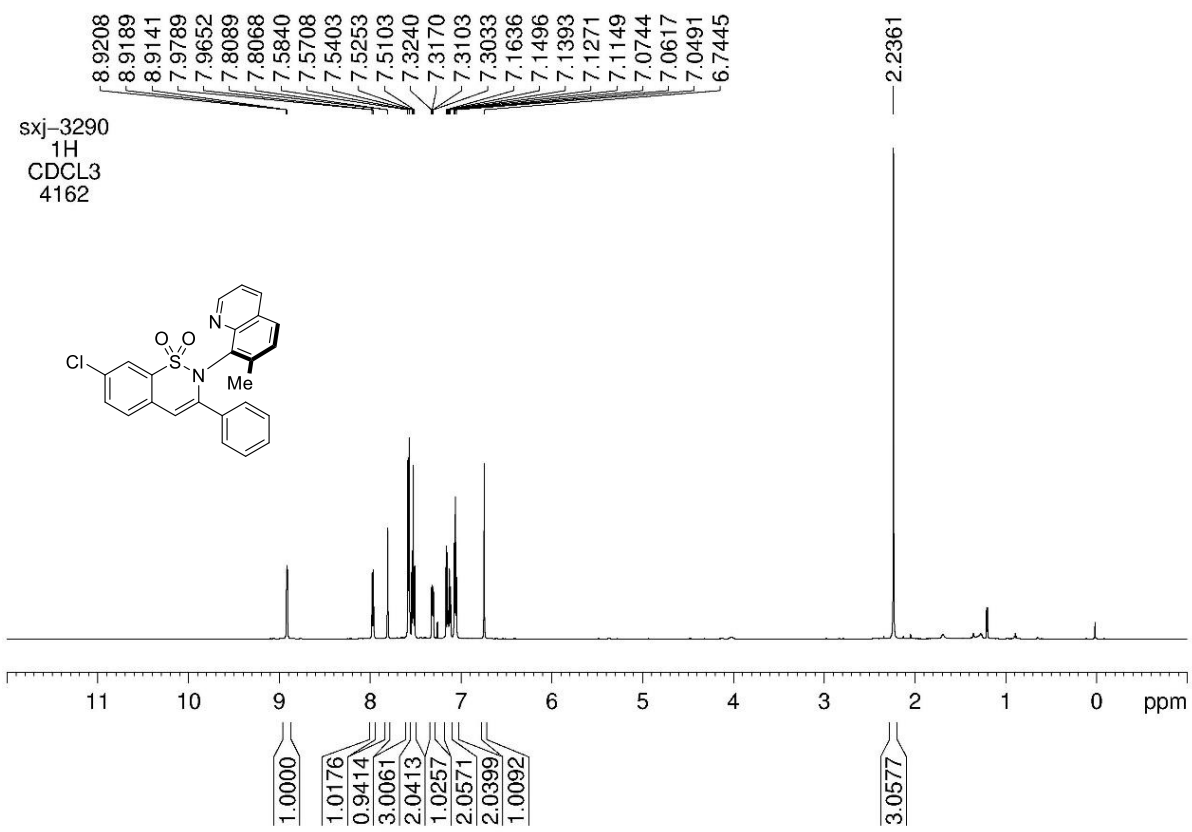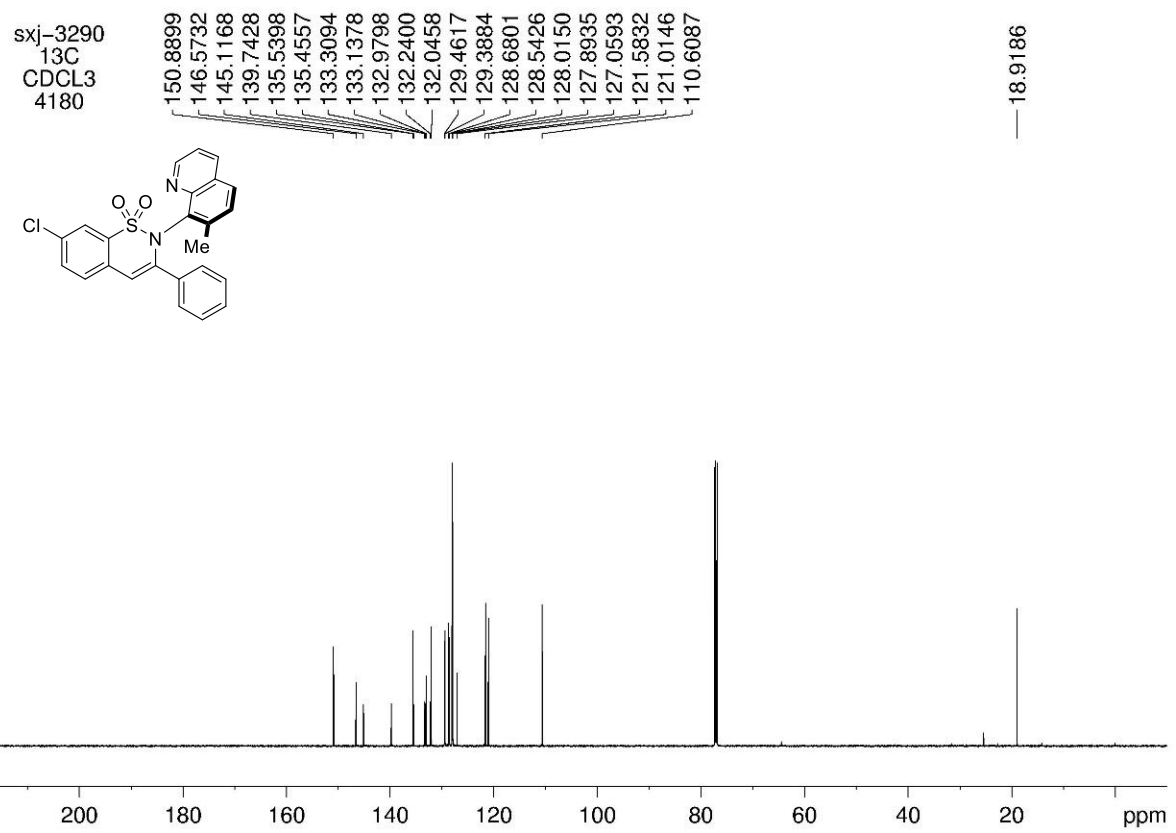

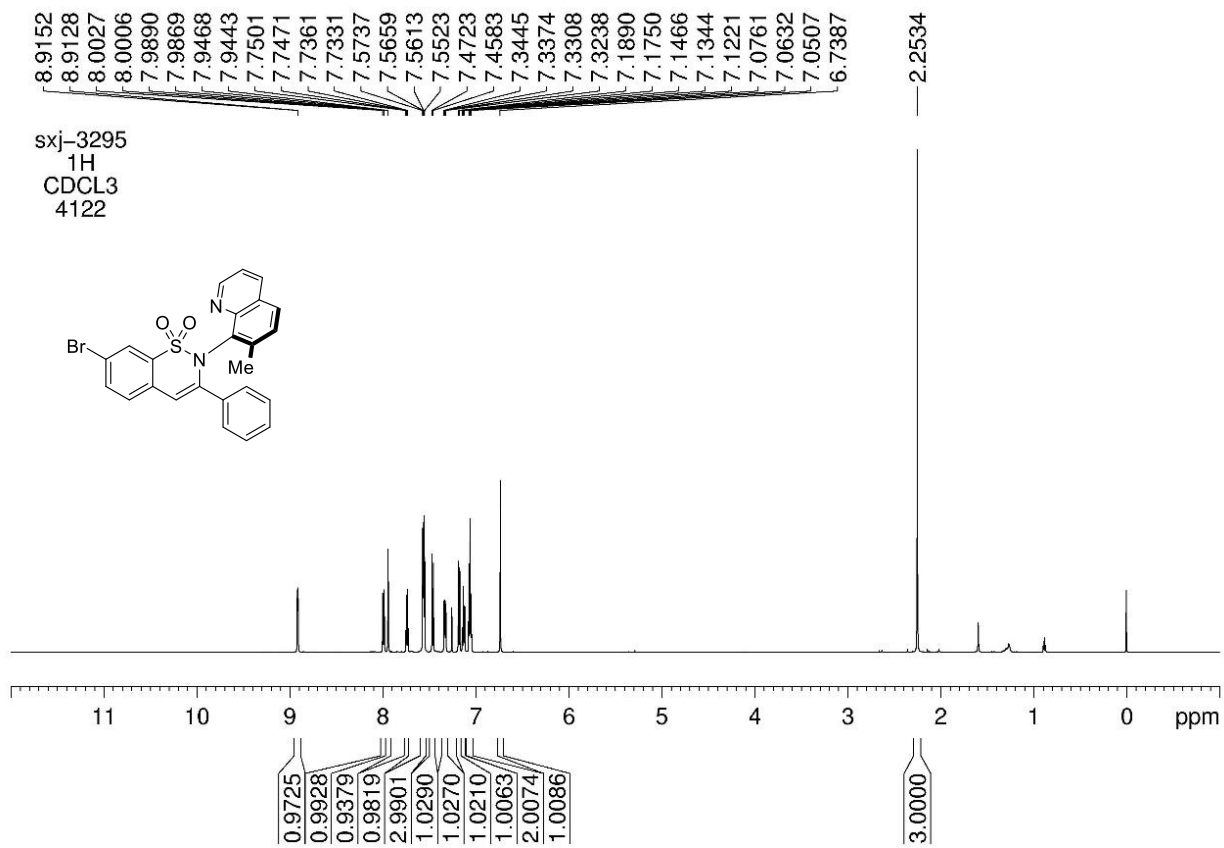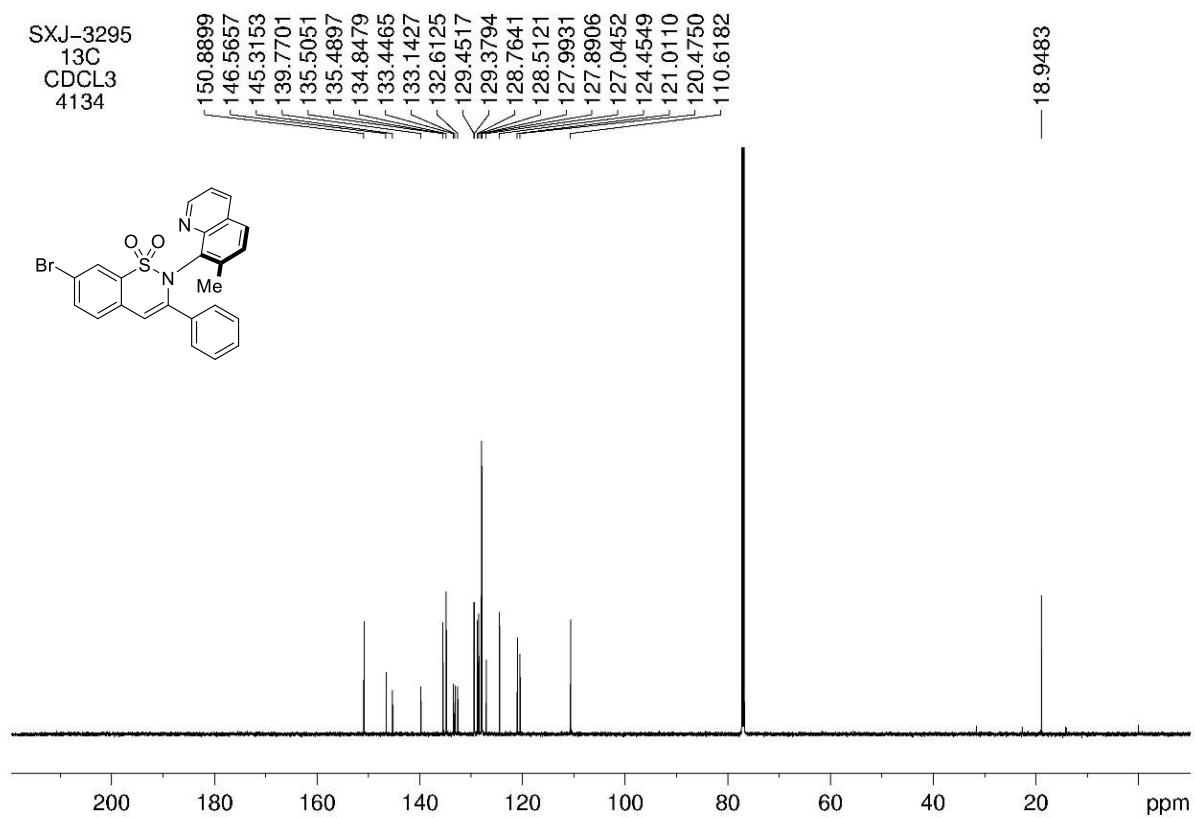

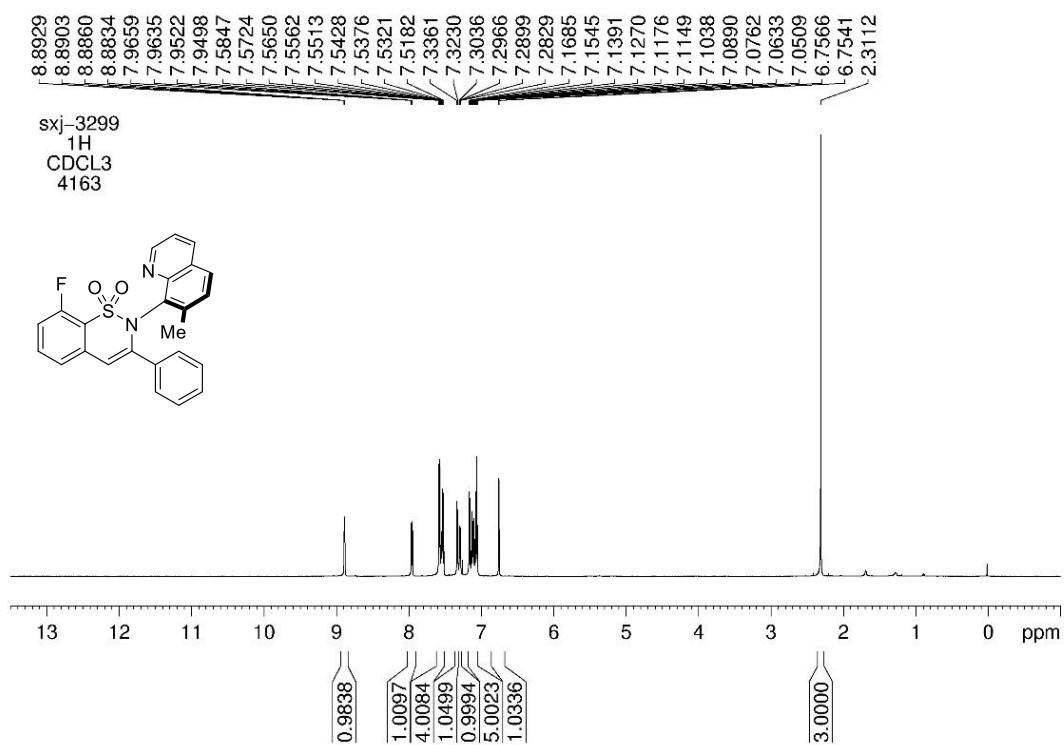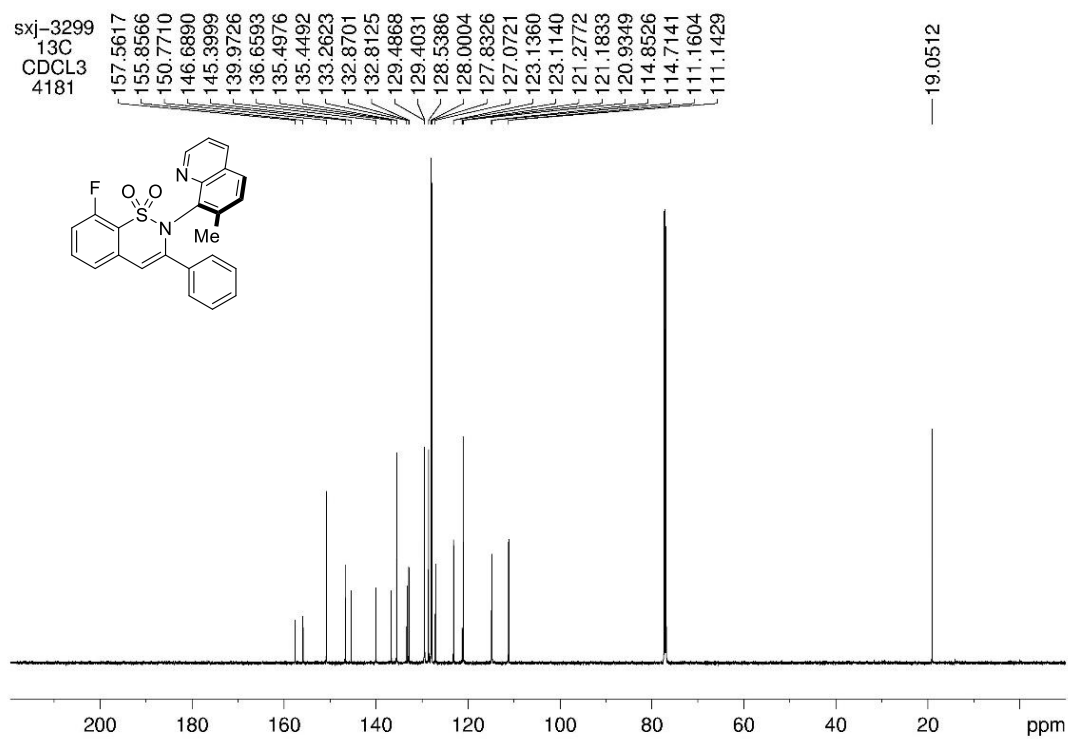

sjj-3299  
19F  
CDCL3  
4182

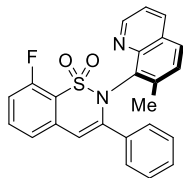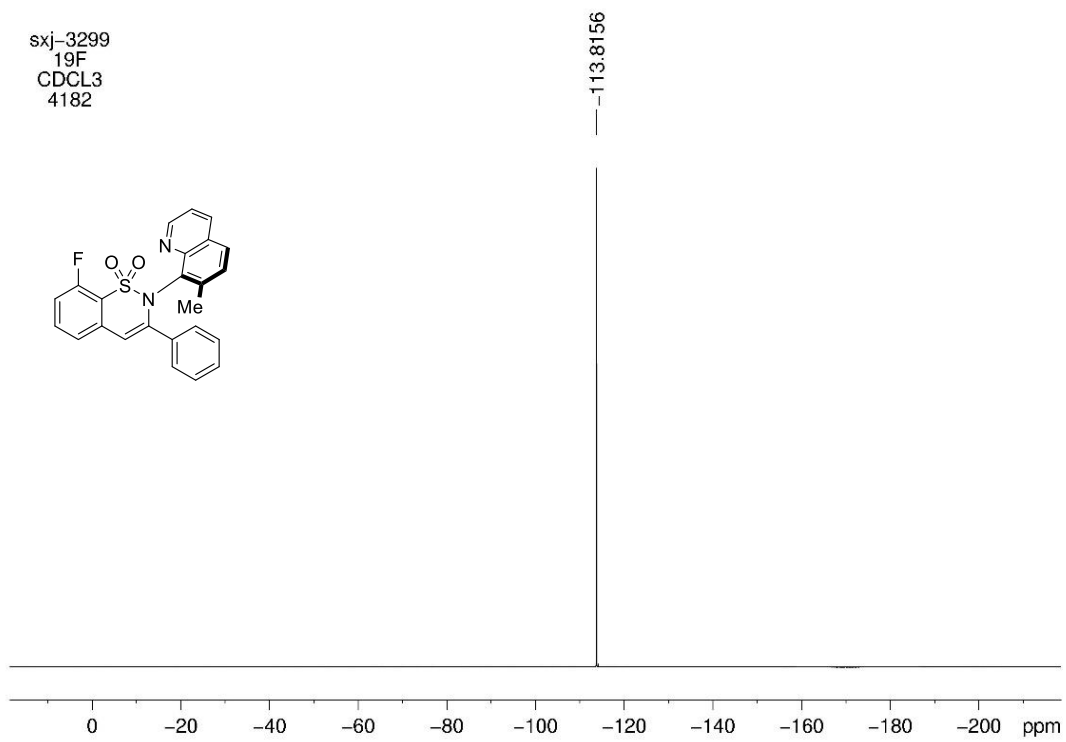

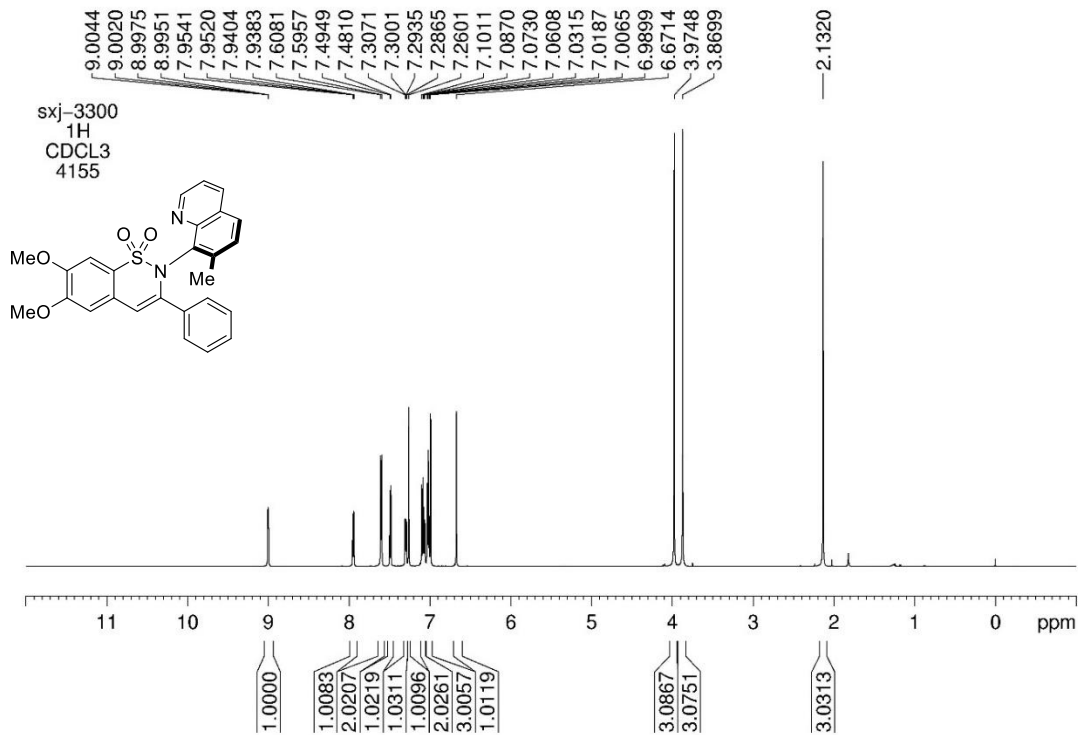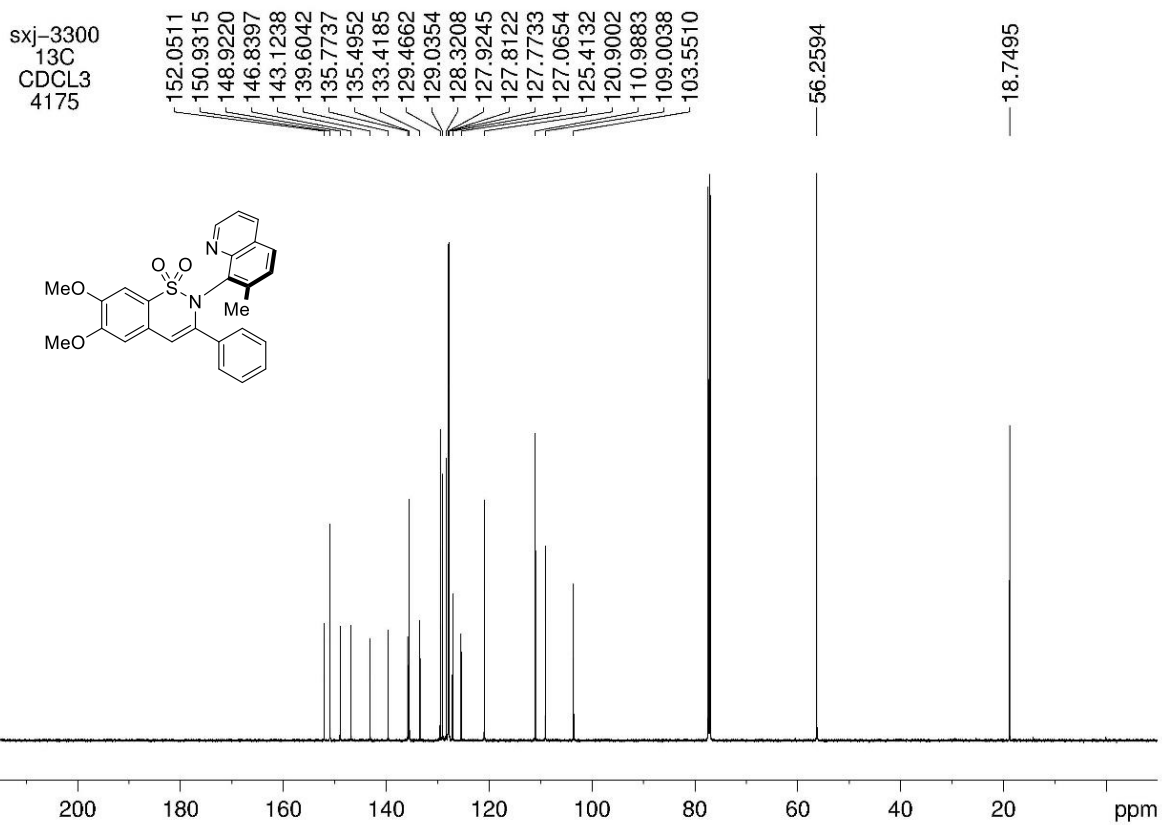



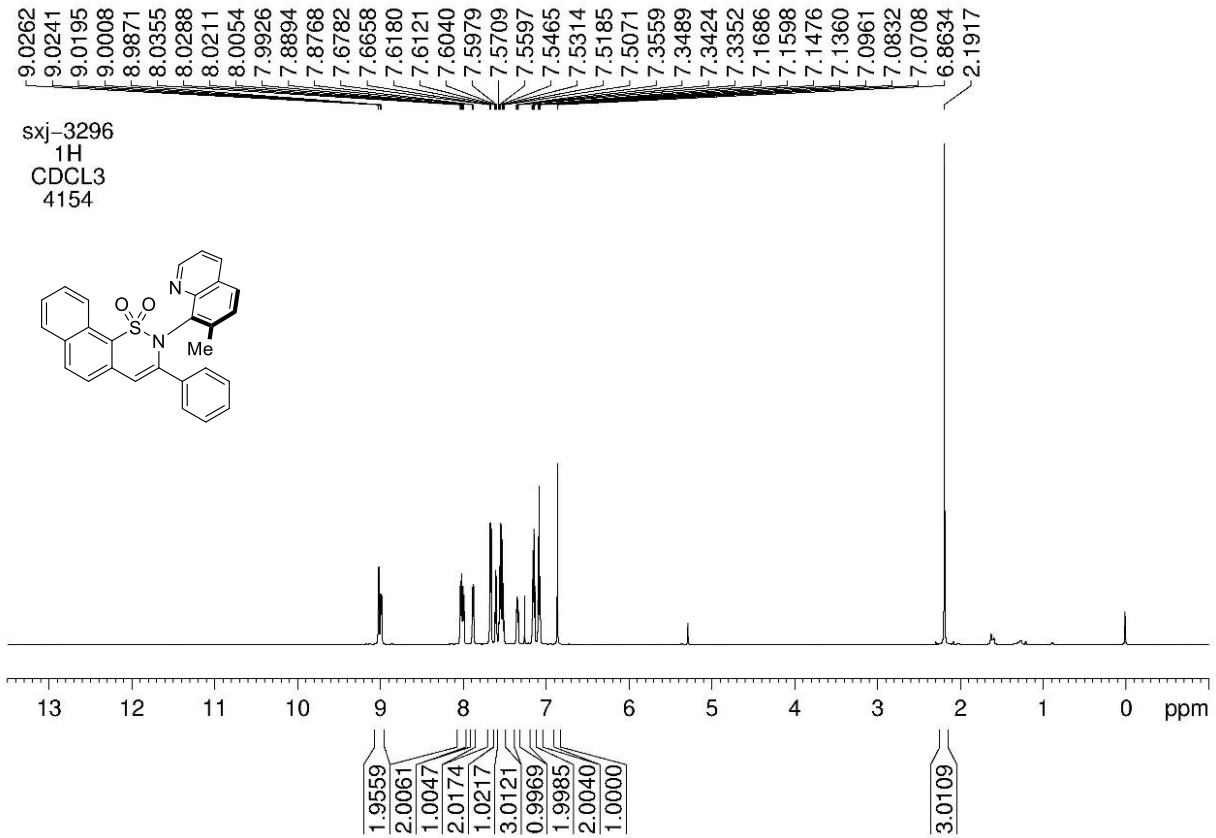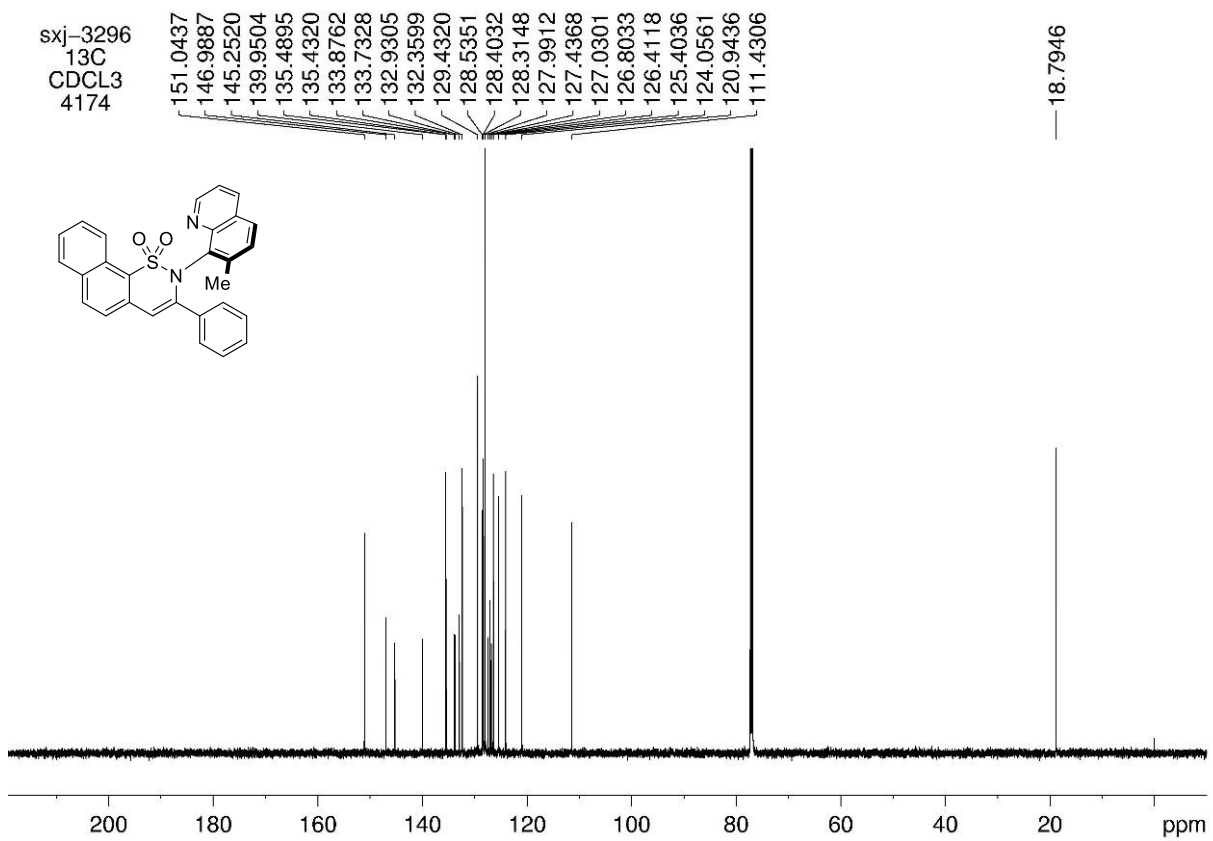

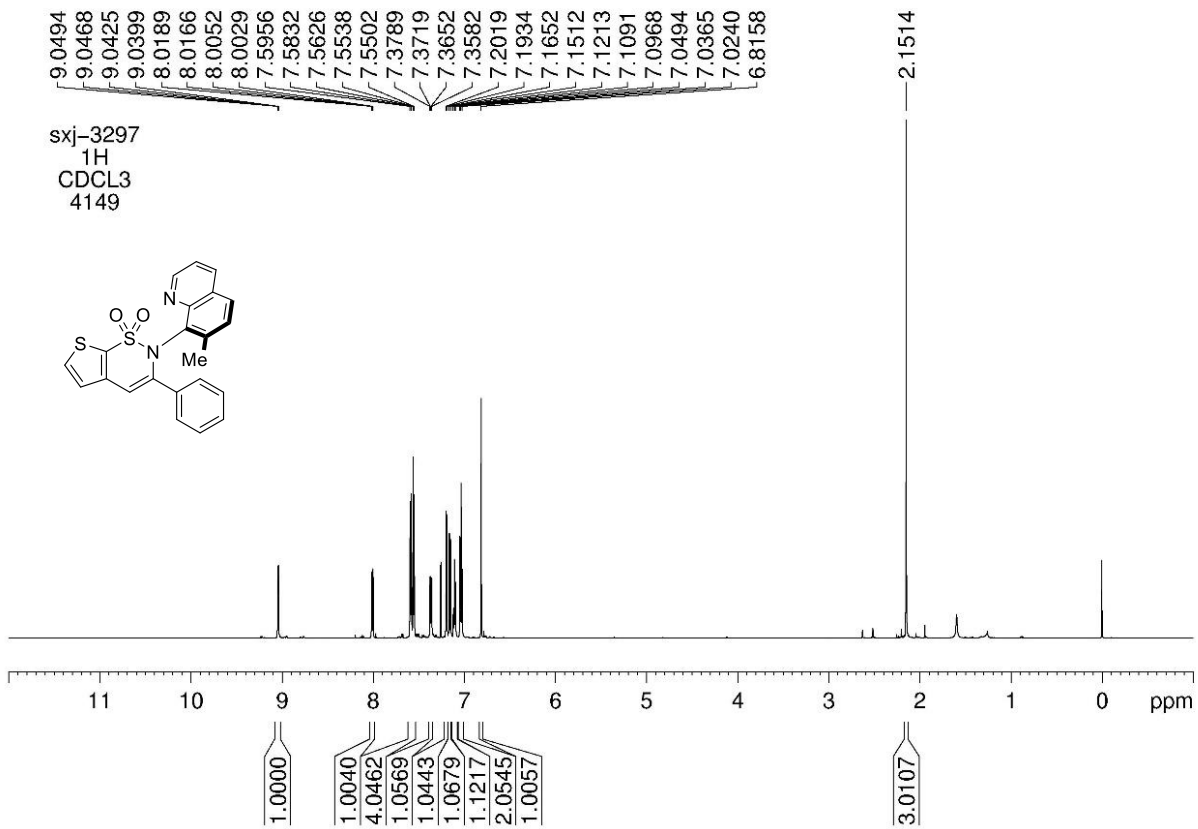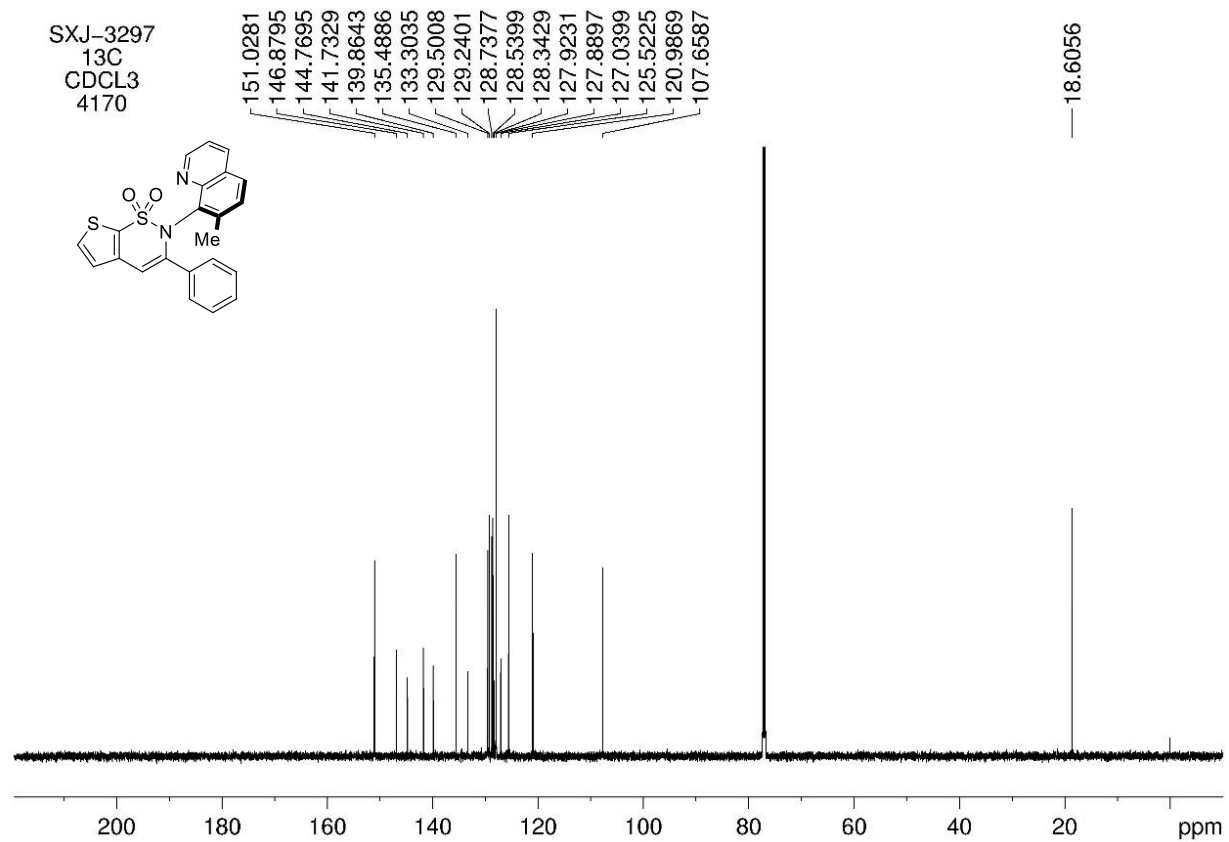

sxj-3262  
1H  
CDCL3  
4159

8.9876  
8.9830  
8.9807  
8.0416  
8.0279  
7.7435  
7.7299  
7.7202  
7.6073  
7.5934  
7.4121  
7.3863  
7.3793  
7.3727  
7.3656  
7.3578  
7.3439  
7.3299  
7.2044  
7.1904  
6.7931

2.5192  
2.1765

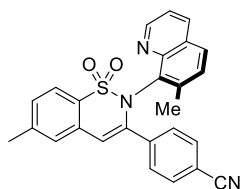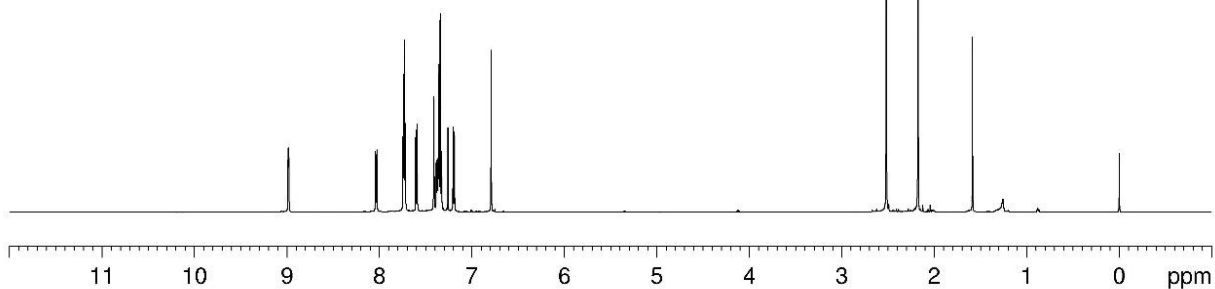

1.0000  
1.0584  
3.0616  
1.0825  
1.0836  
4.0456  
1.0333  
1.0258

3.0849  
3.1103

sxj-3262  
13C  
CDCL3  
4179

151.0942  
146.5576  
142.6934  
142.6059  
140.0793  
139.6673  
135.6608  
133.0031  
132.9590  
131.8441  
130.6404  
129.5151  
129.4002  
128.7212  
128.3158  
127.8018  
127.1551  
121.6423  
121.1687  
118.2789  
112.9781  
112.6943

21.7493  
18.7946

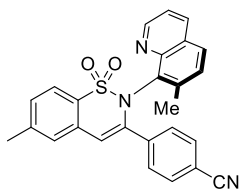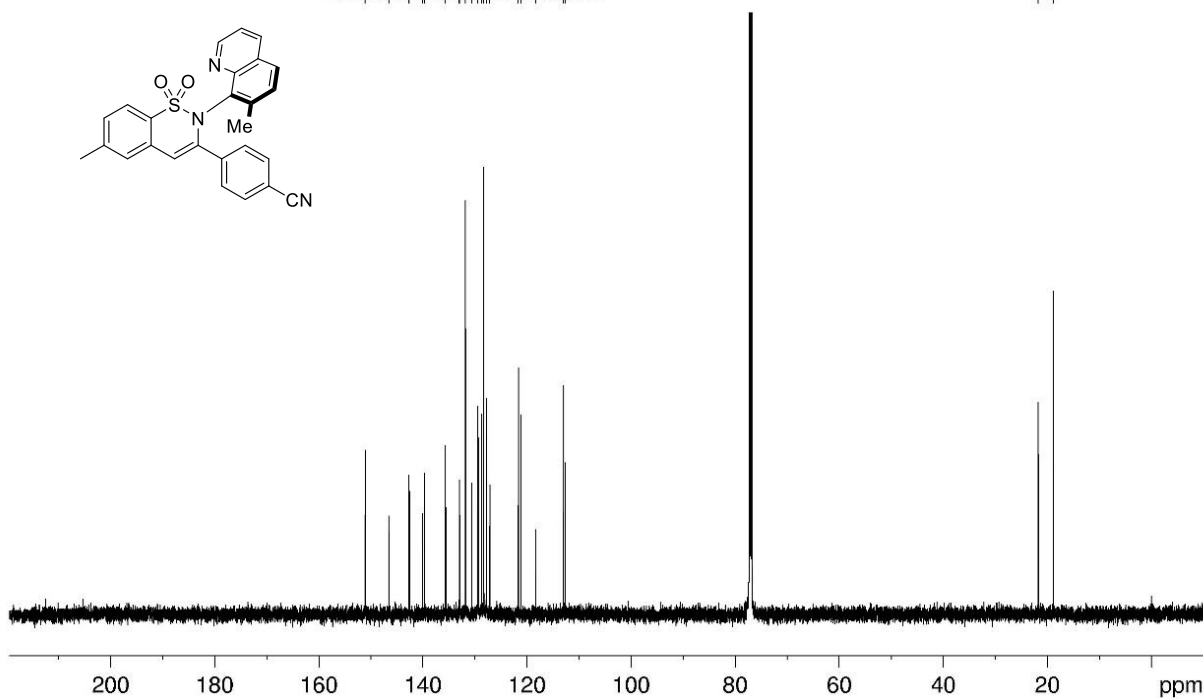

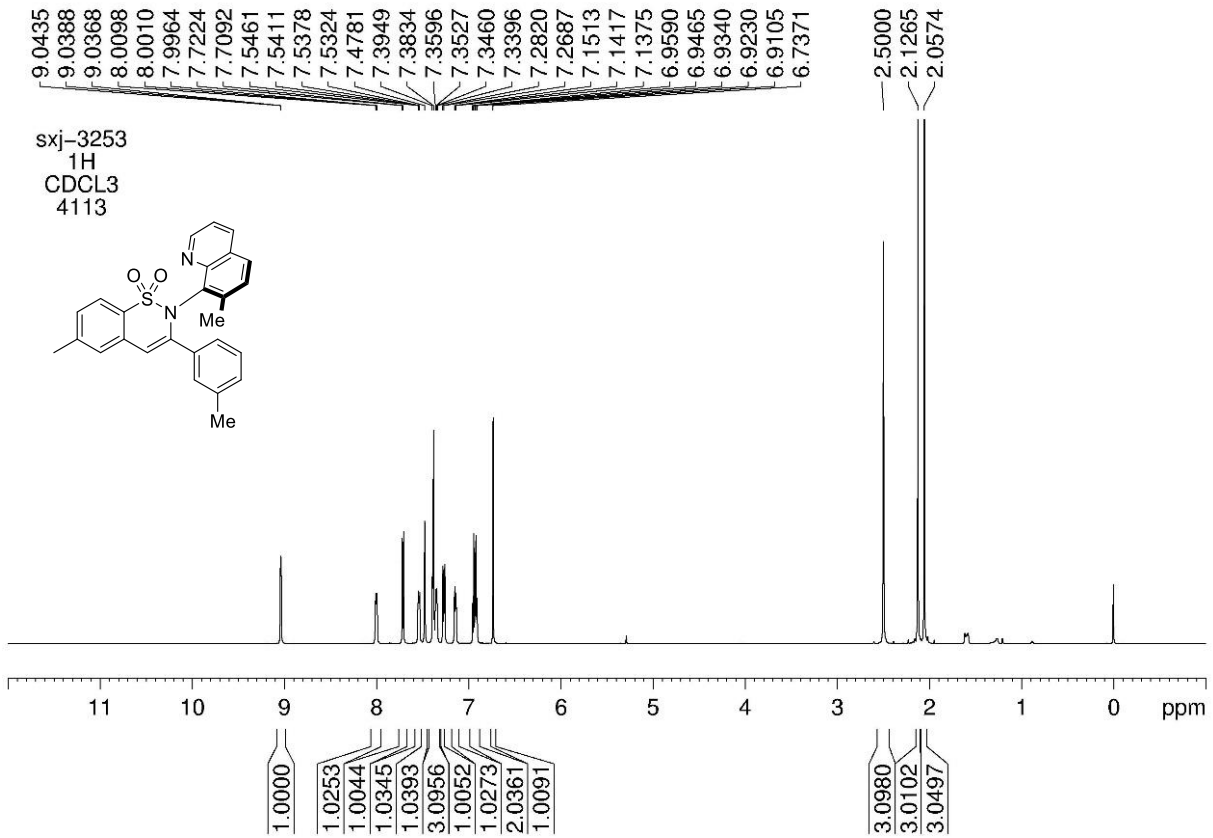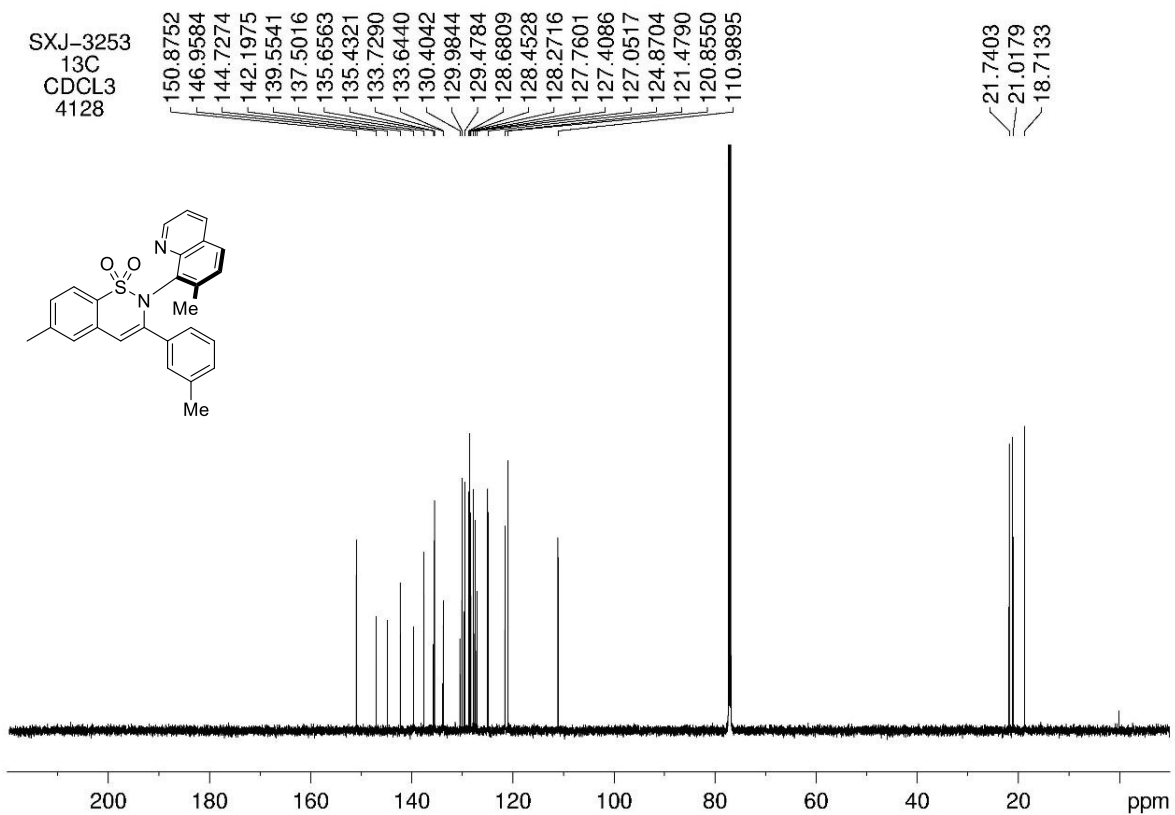

sj-3252  
1H  
CDCL3  
4112

8.5479  
8.5454  
8.5411  
8.5386  
7.9533  
7.9398  
7.7308  
7.7176  
7.5518  
7.5383  
7.3295  
7.3153  
7.3019  
7.2354  
7.2206  
7.2134  
7.2067  
7.1996  
7.0145  
7.0075  
6.8989  
6.7642  
6.4828

2.5153  
2.4761  
2.4482

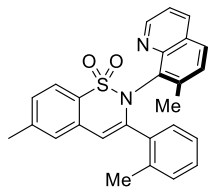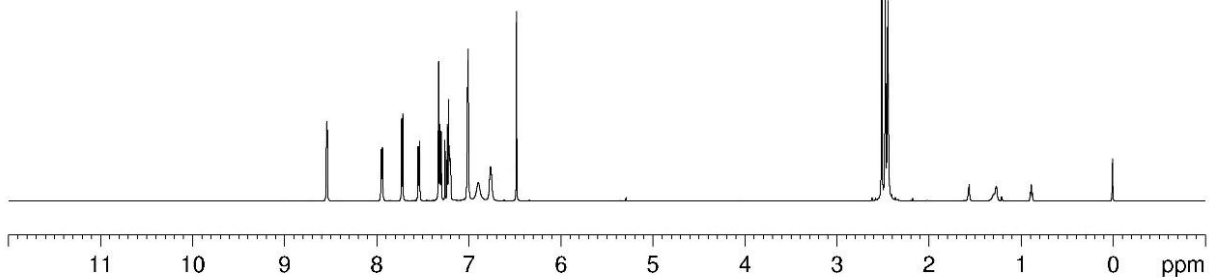

1.0000  
1.0088  
0.9937  
1.0171  
2.0539  
2.0559  
2.0278  
0.9763  
1.0330  
1.0214

3.0381  
3.0355  
3.0552

SXJ-3252  
13C  
CDCL3  
4127

150.3636  
146.7053  
143.0923  
141.9445  
141.4737  
137.8416  
135.3401  
135.0961  
133.6090  
132.9122  
130.0343  
129.5159  
129.1461  
128.5593  
128.4901  
128.2667  
127.2259  
126.9492  
124.4484  
121.2999  
120.7621  
113.0812

21.7553  
19.6116  
19.3013

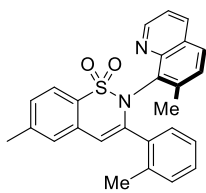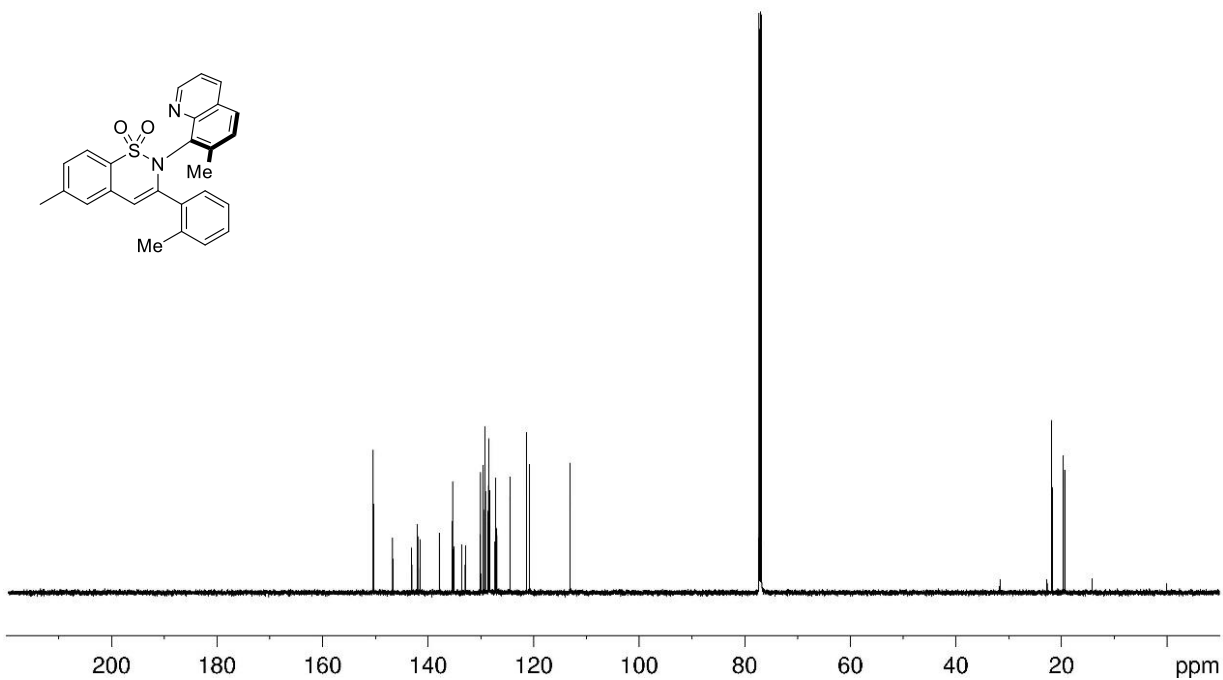

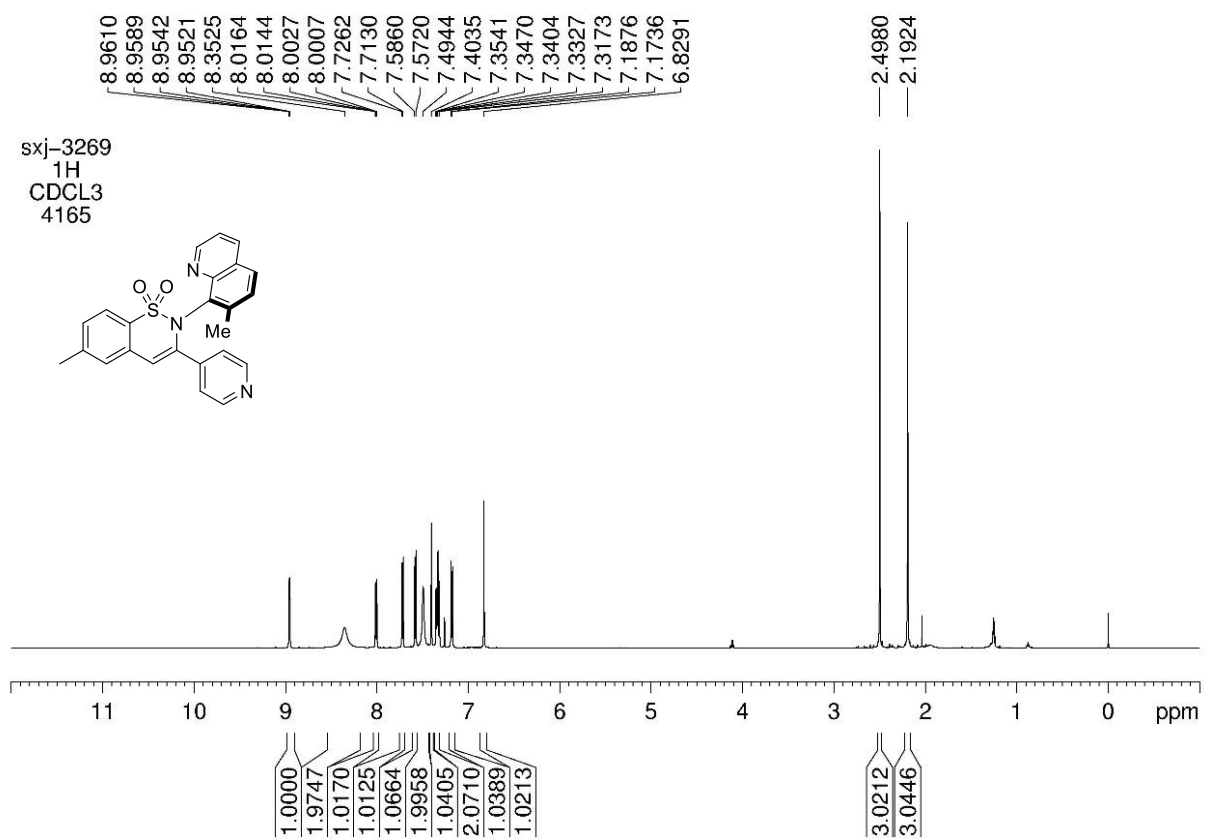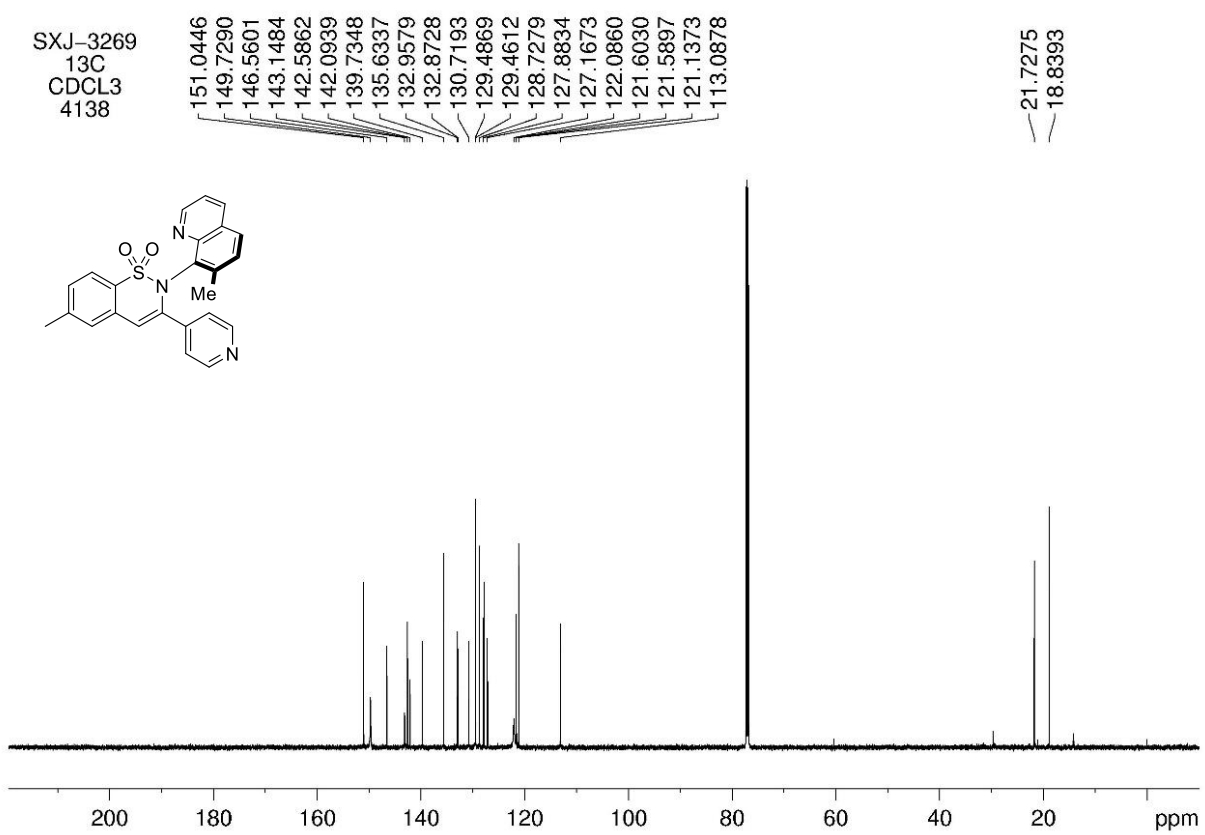

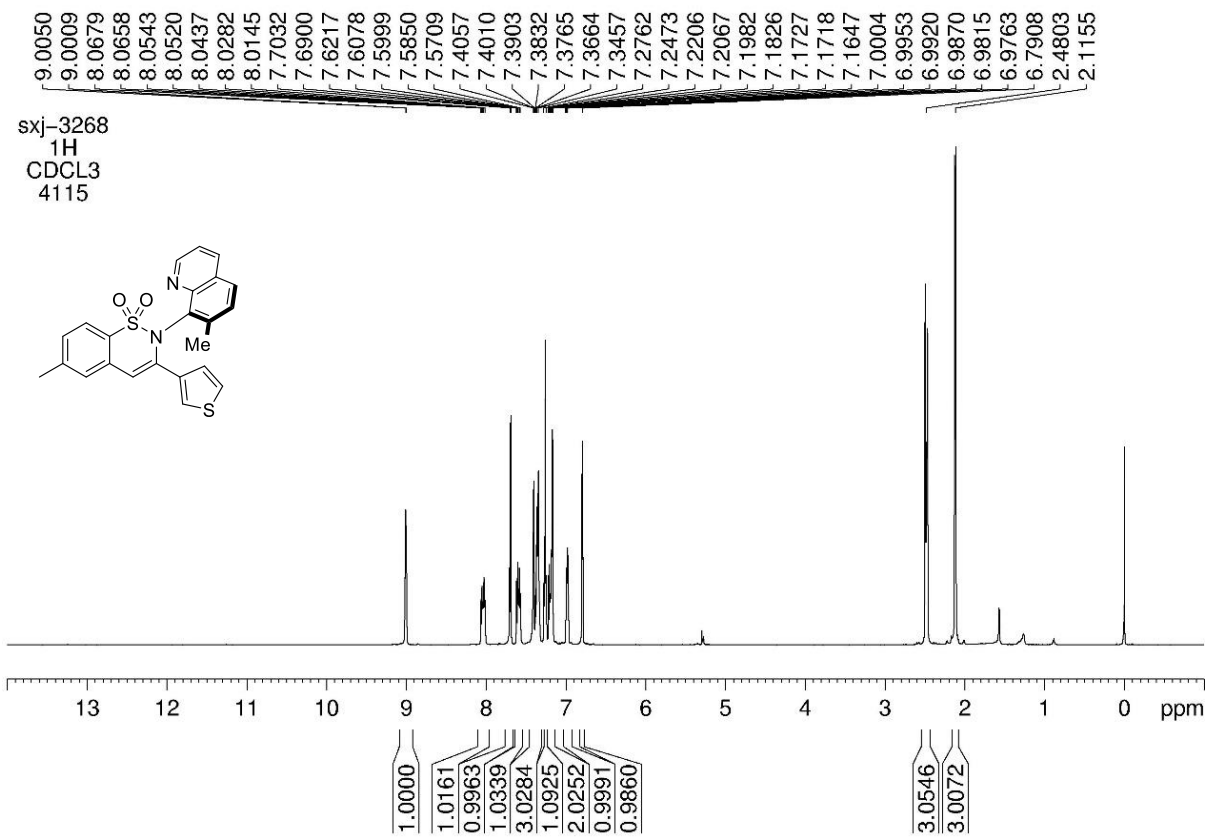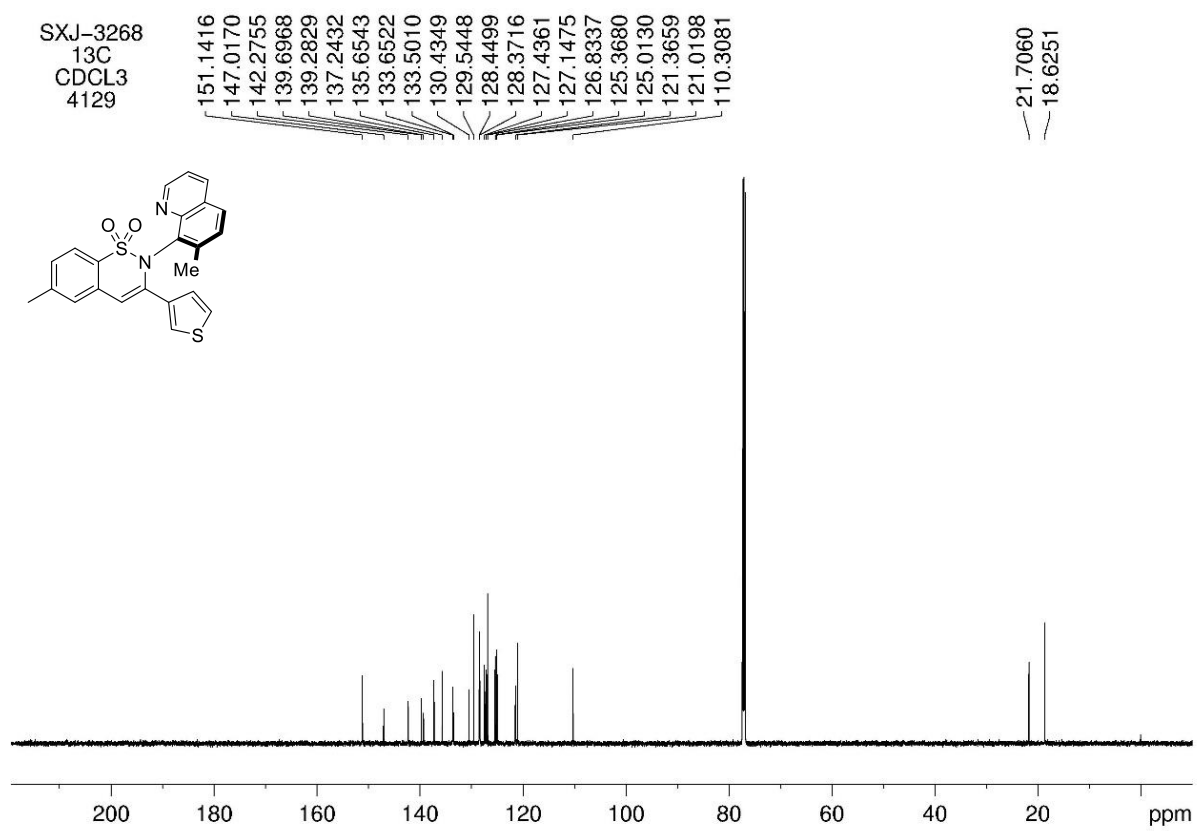

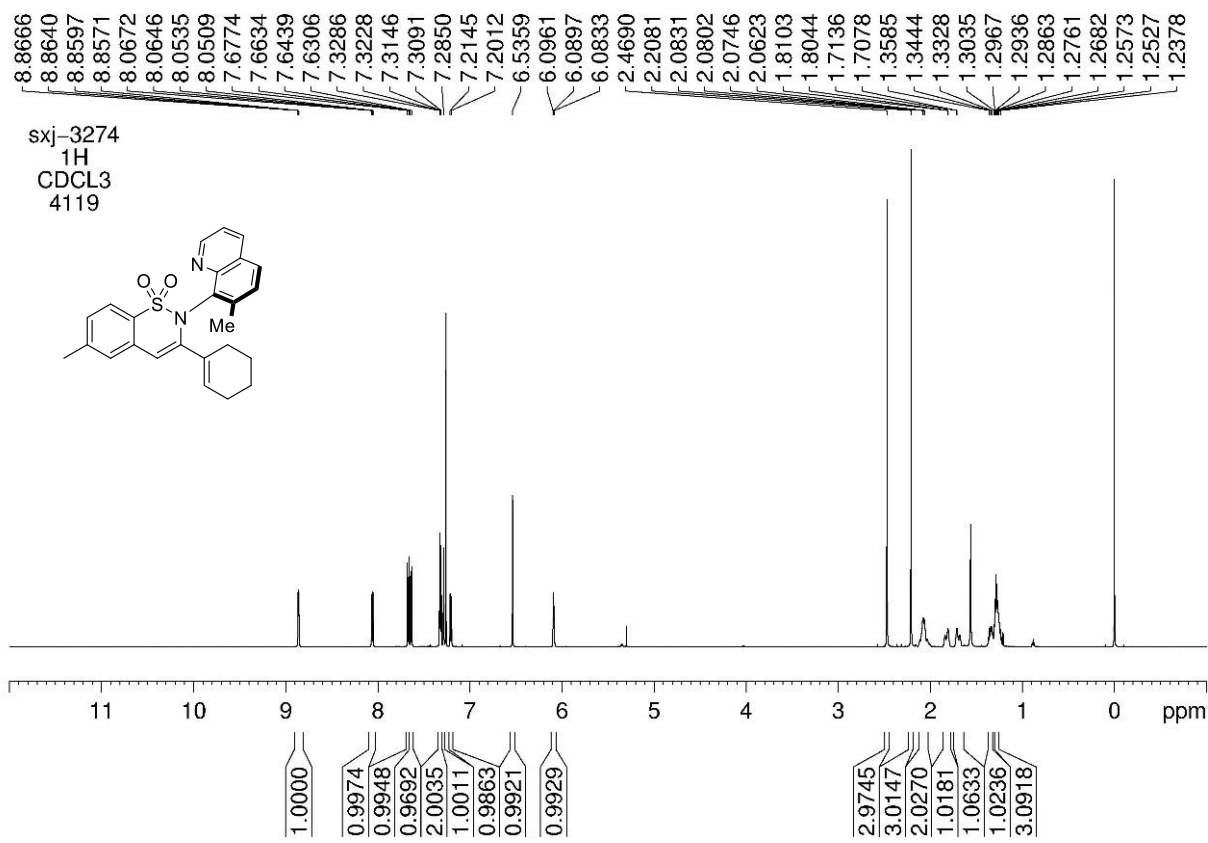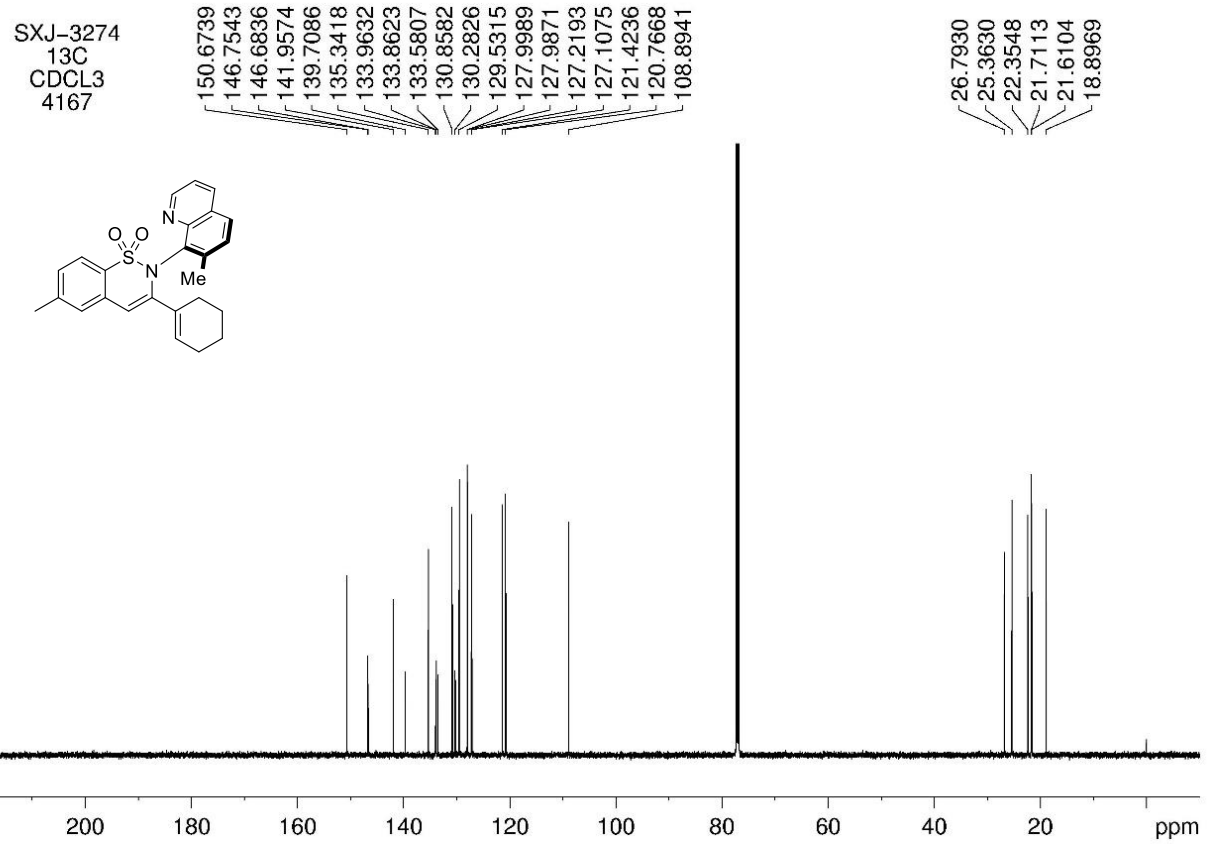



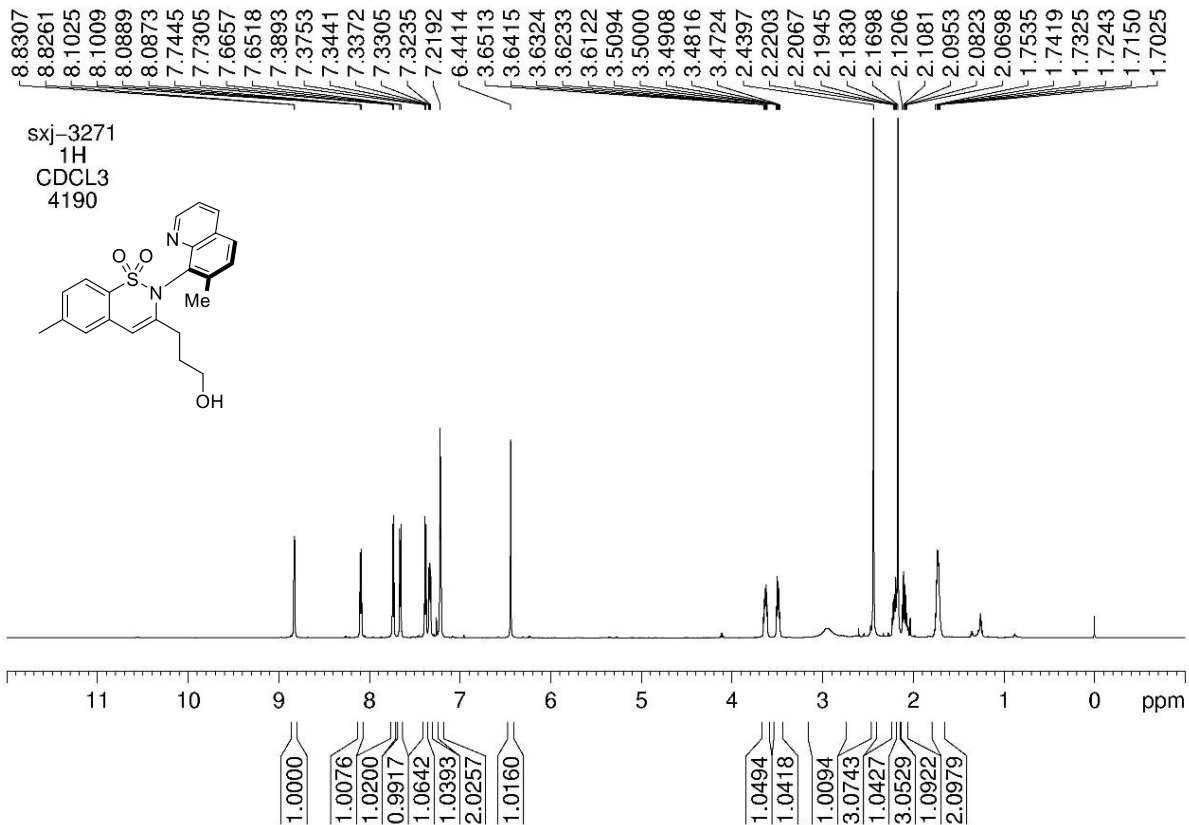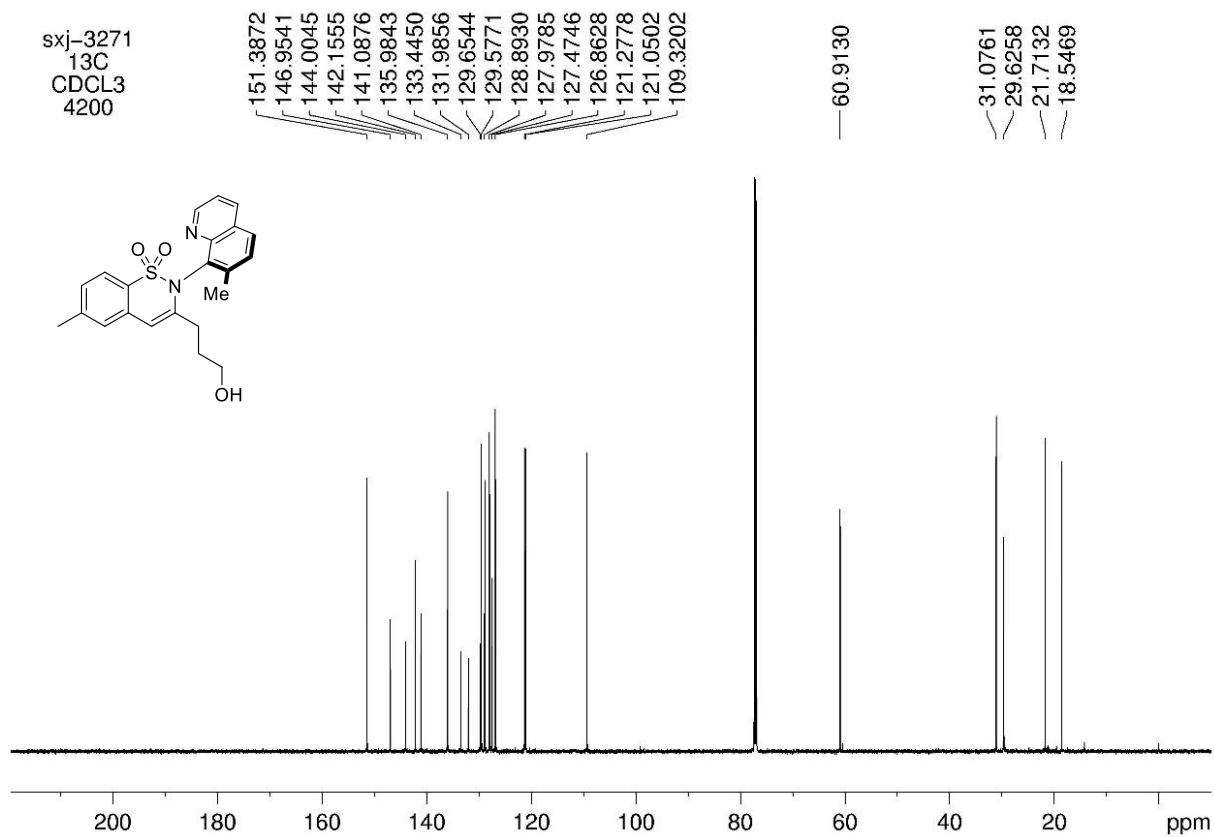

8.7507  
8.7456  
8.0933  
8.0798  
7.7700  
7.7560  
7.6928  
7.6790  
7.4624  
7.4485  
7.3069  
7.2999  
7.2933  
7.2864  
7.2102  
6.1915  
2.4462  
2.4100  
1.3541  
1.3493  
1.3409  
1.3323  
1.3278  
1.3185  
0.5197  
0.5129  
0.5041  
0.4975  
0.4885  
0.4682  
0.4599  
0.4523  
0.4439  
0.4367  
0.4279  
0.4016  
0.3870  
0.3798  
0.3722  
0.3660  
0.3568  
0.3521  
0.3375  
0.3302  
0.3216

sxj-3261  
1H  
CDCL3  
4158

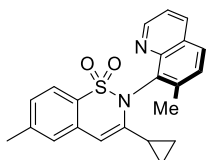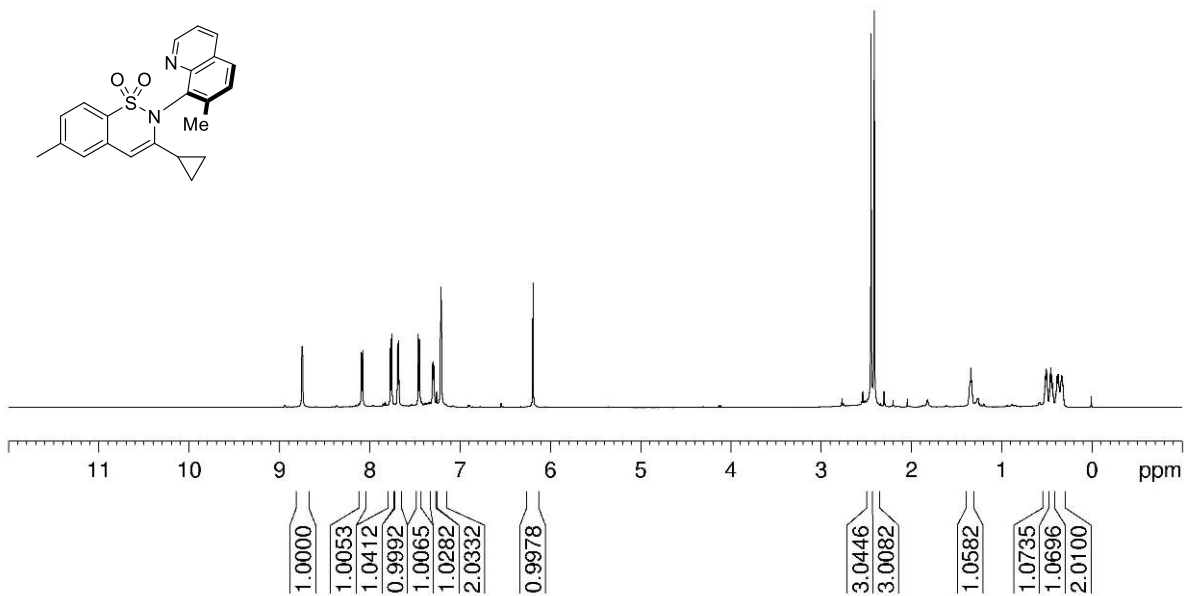

sxj-3261  
13C  
CDCL3  
4178

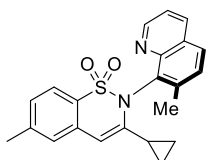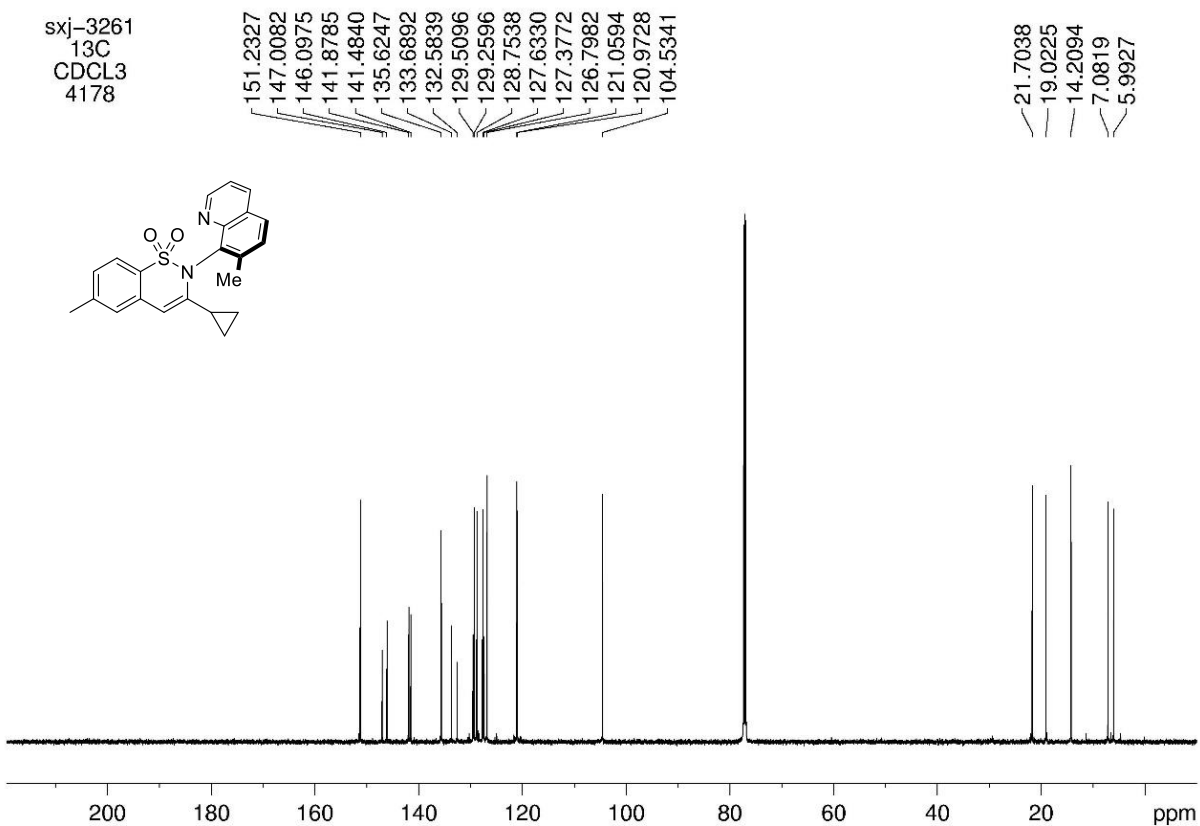

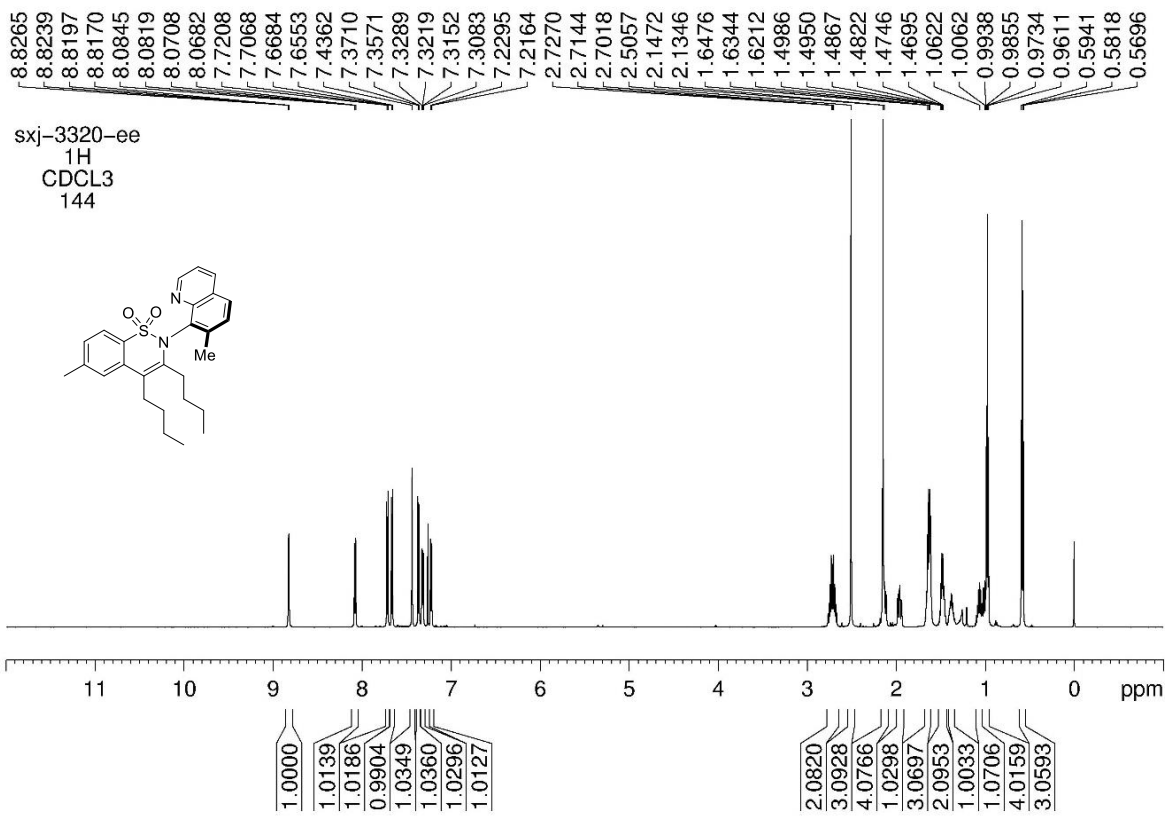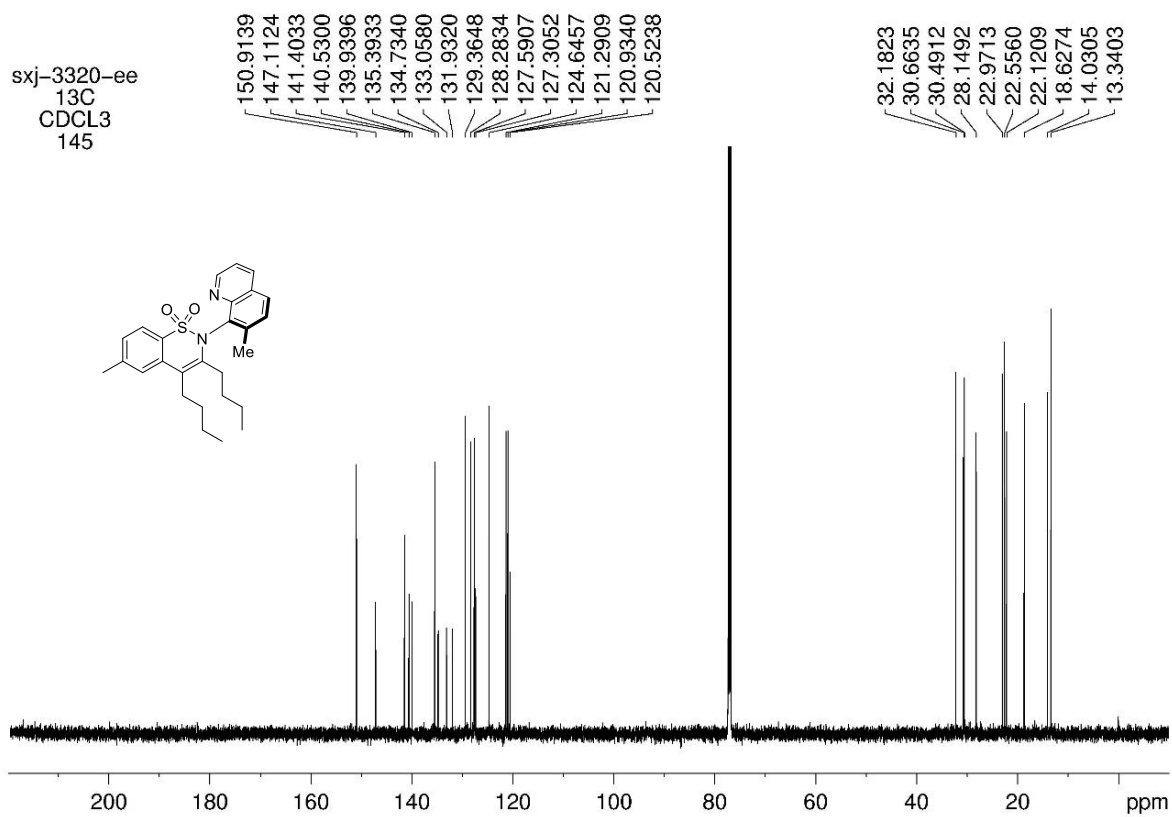

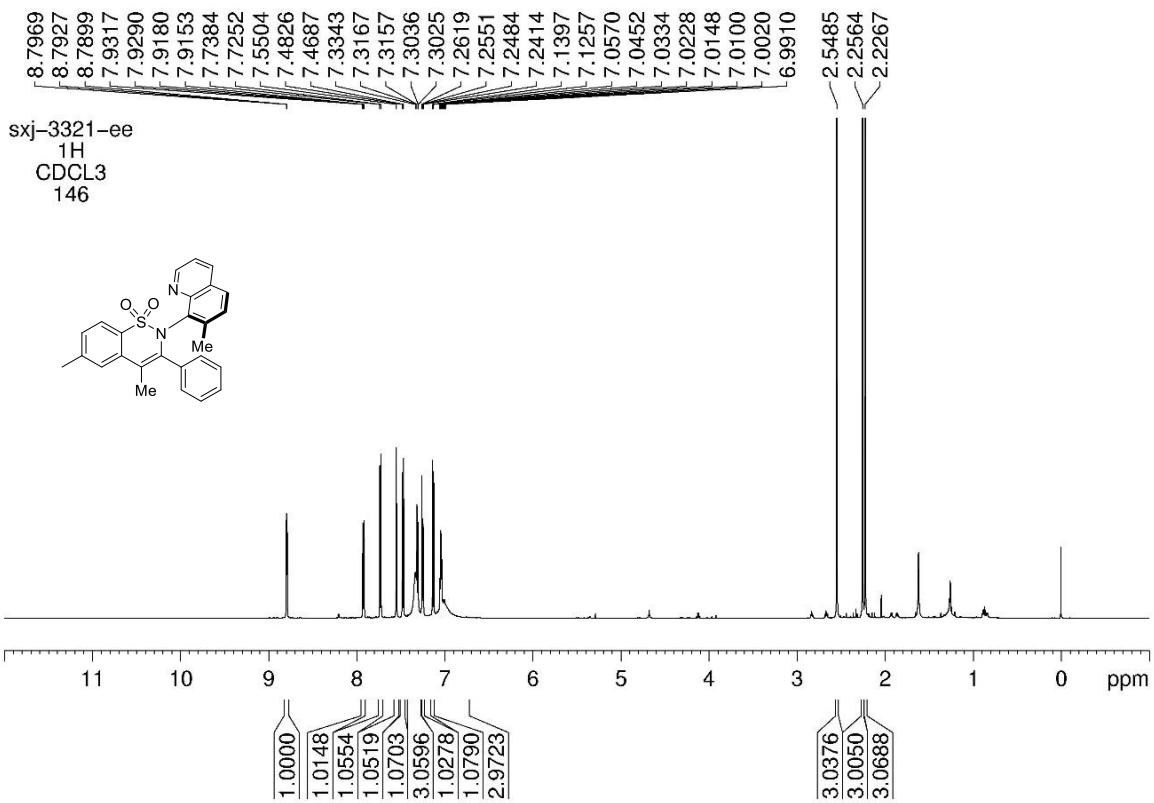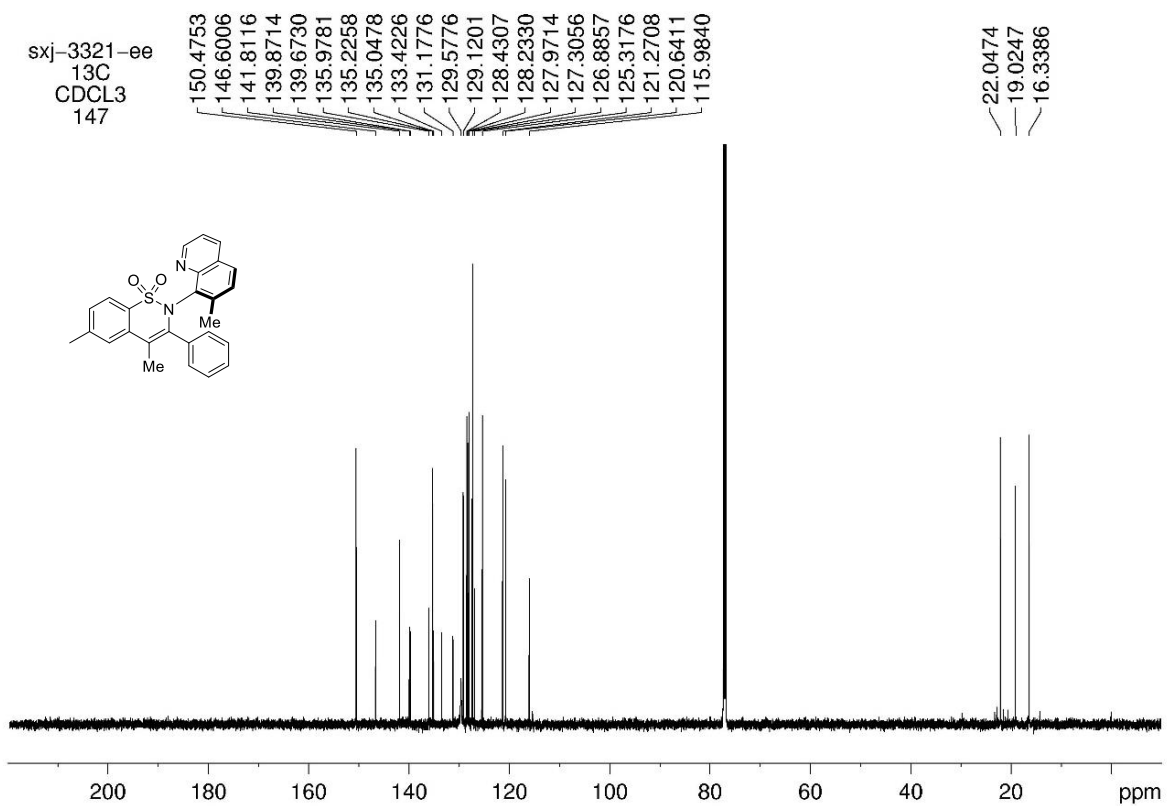

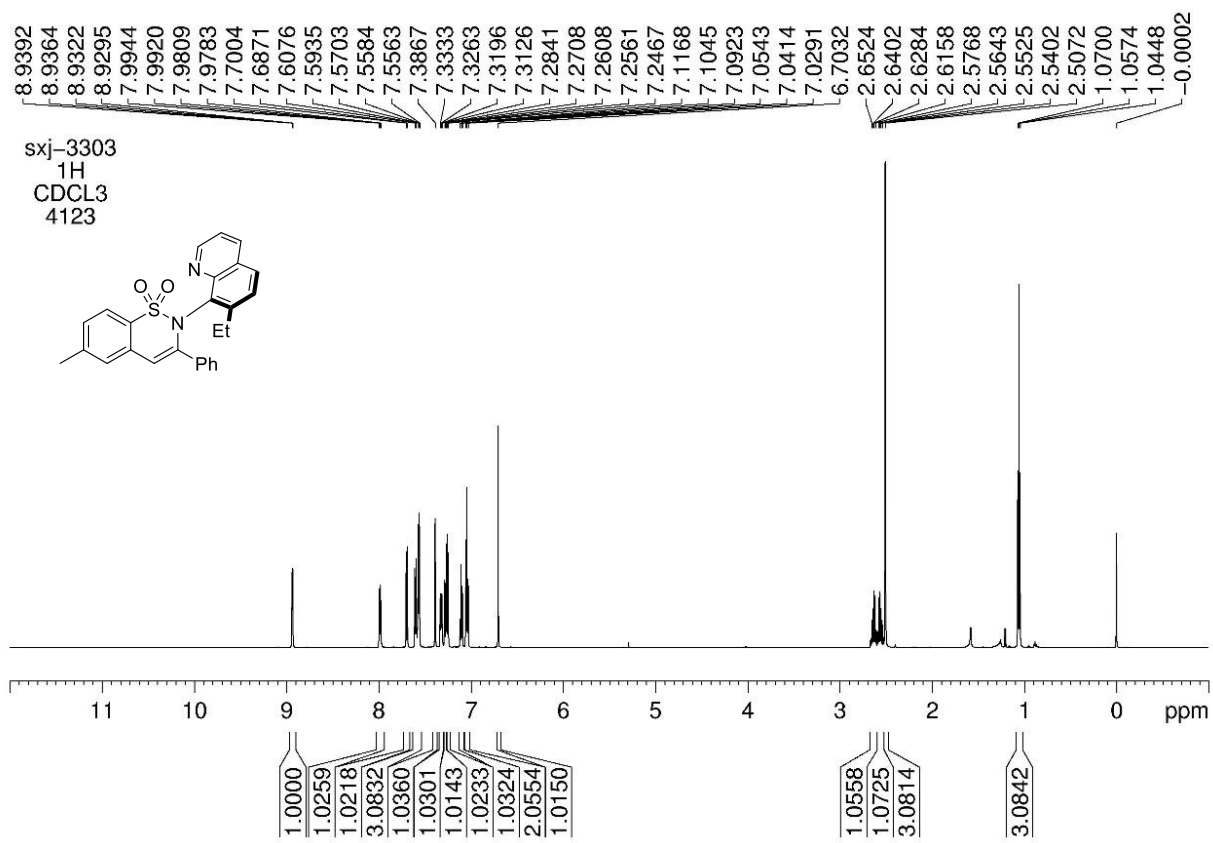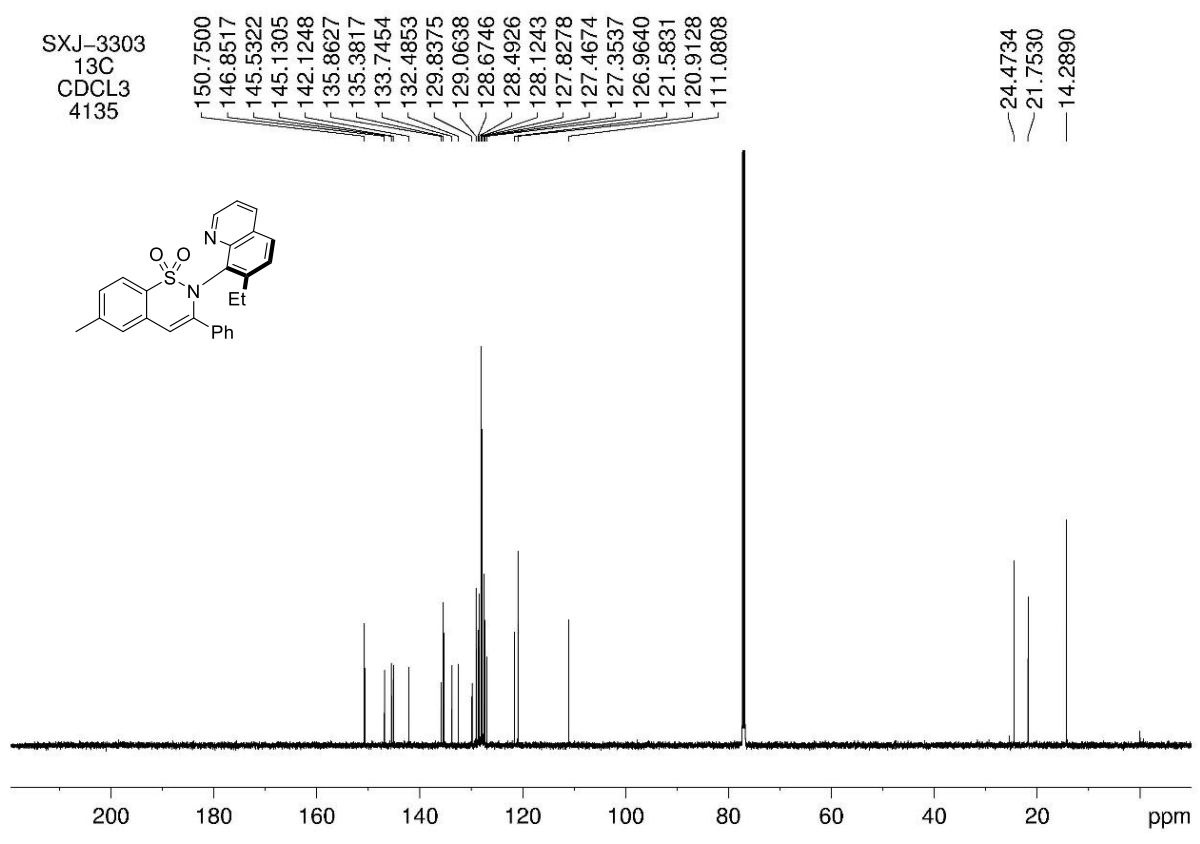

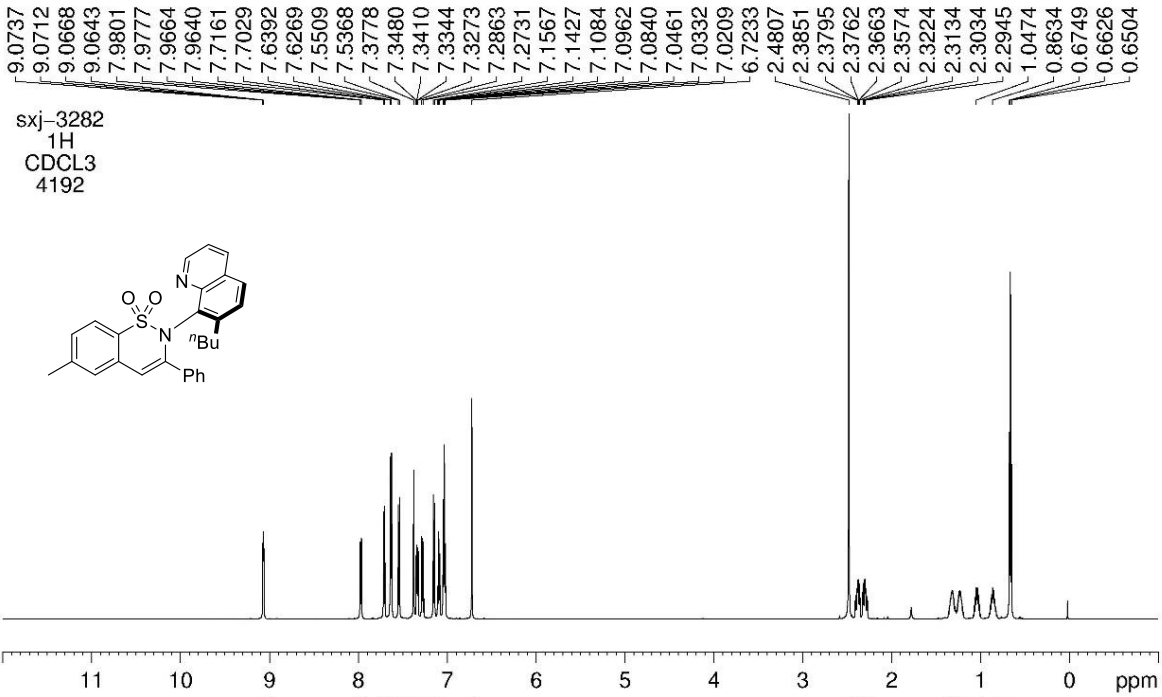

sxj-3282  
 13C  
 CDCL3  
 4201

150.9254  
 147.1842  
 145.0737  
 144.2784  
 142.2044  
 135.7549  
 135.4702  
 133.6111  
 132.6910  
 130.0983  
 129.1605  
 128.6365  
 128.5717  
 128.2201  
 128.0577  
 127.8748  
 127.3872  
 127.0161  
 121.5973  
 120.9556  
 111.1607

32.9107  
 31.3755  
 22.9713  
 21.6890  
 13.7045

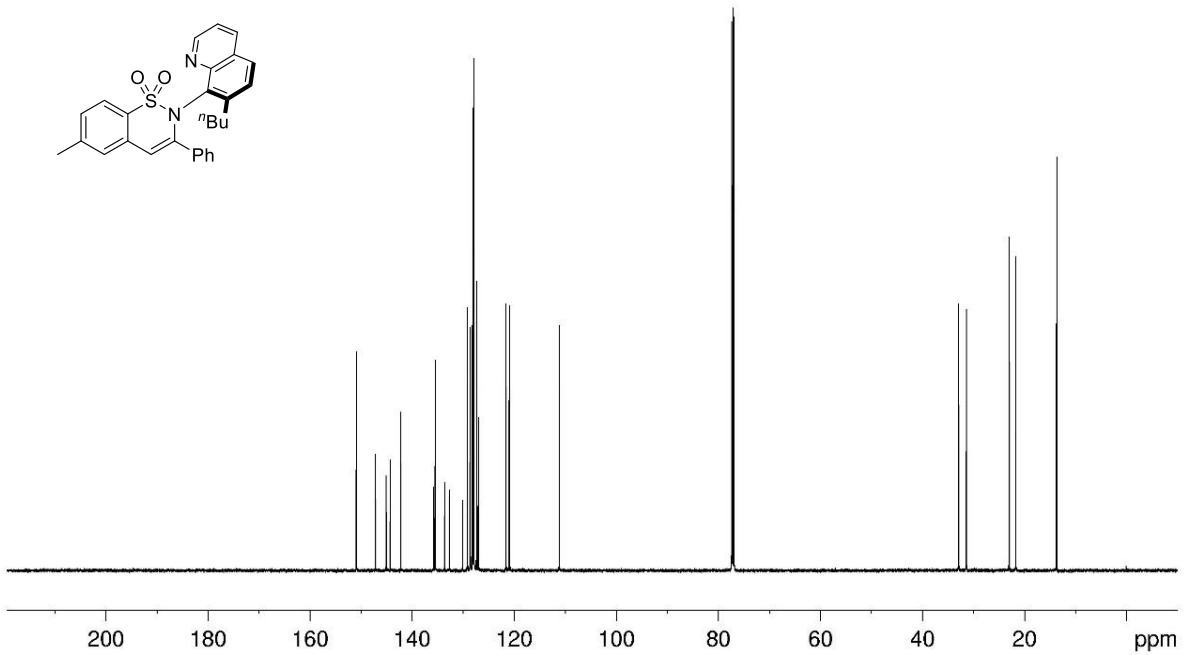

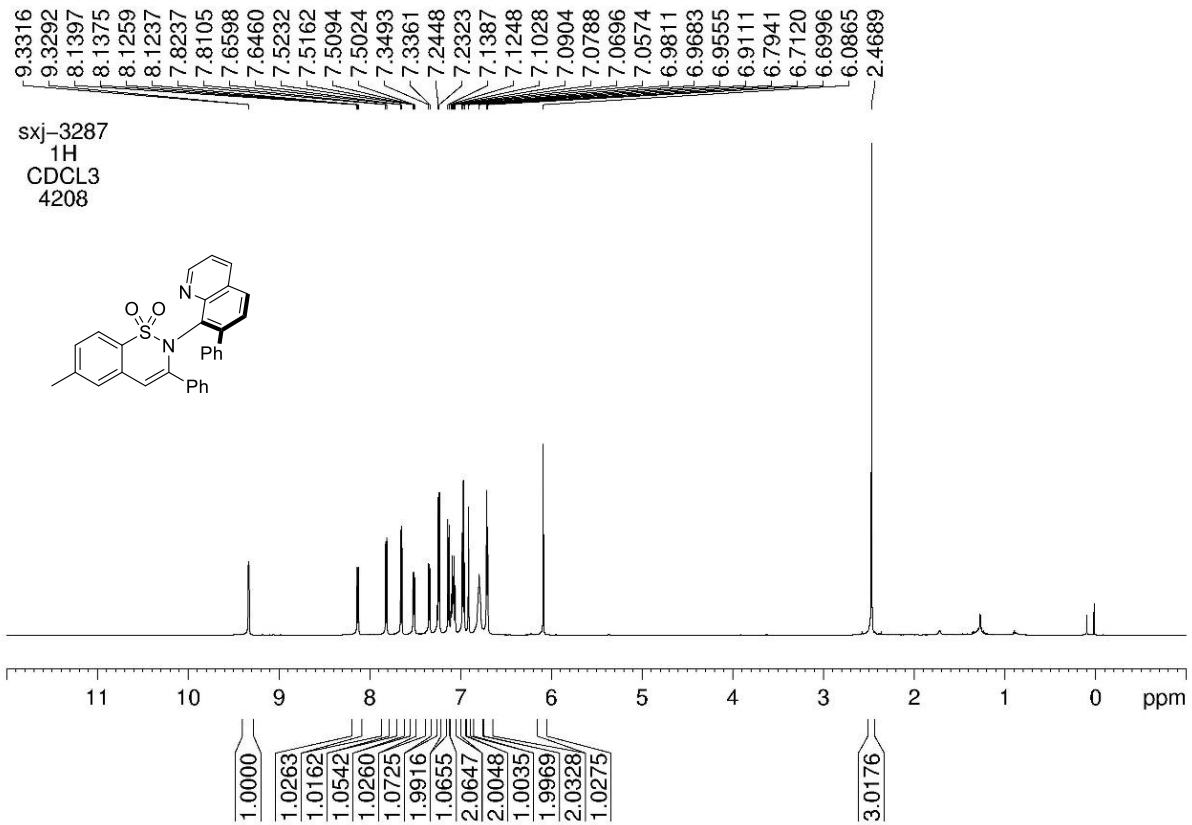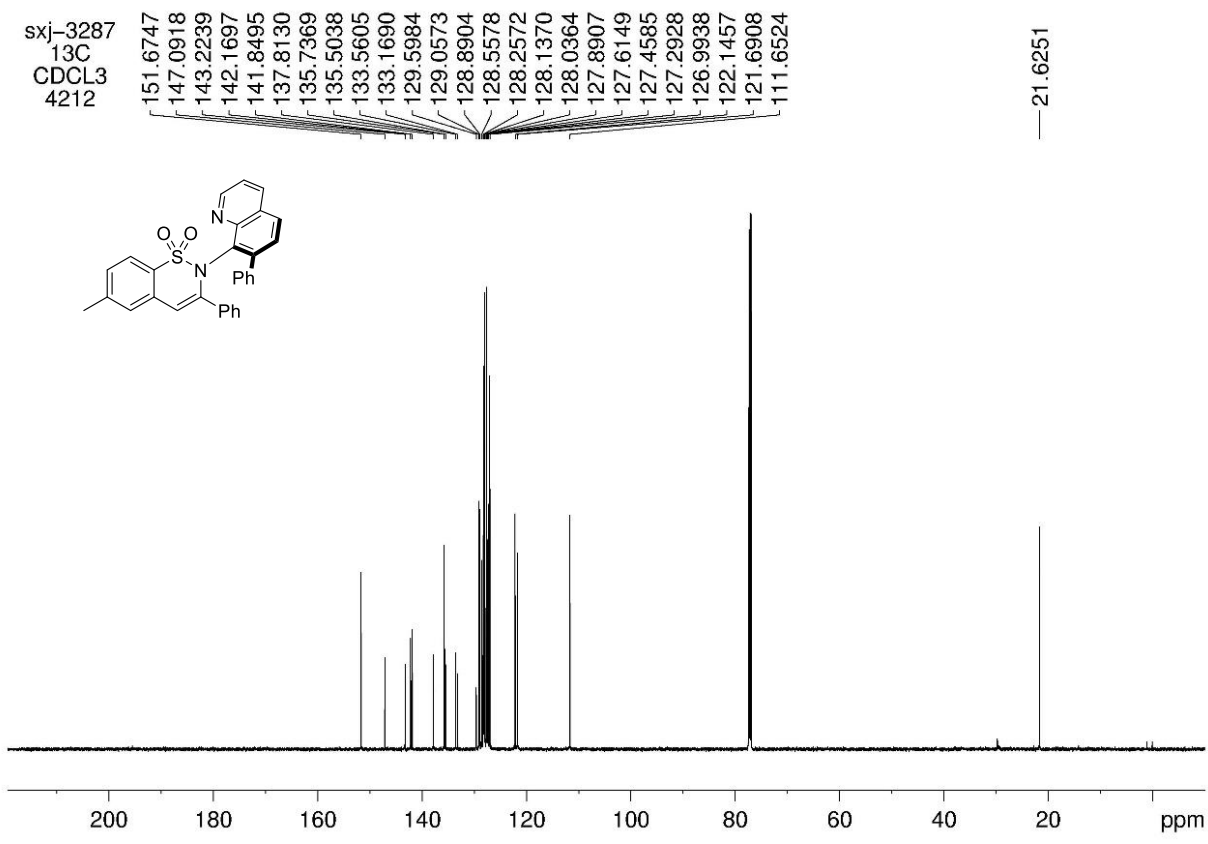

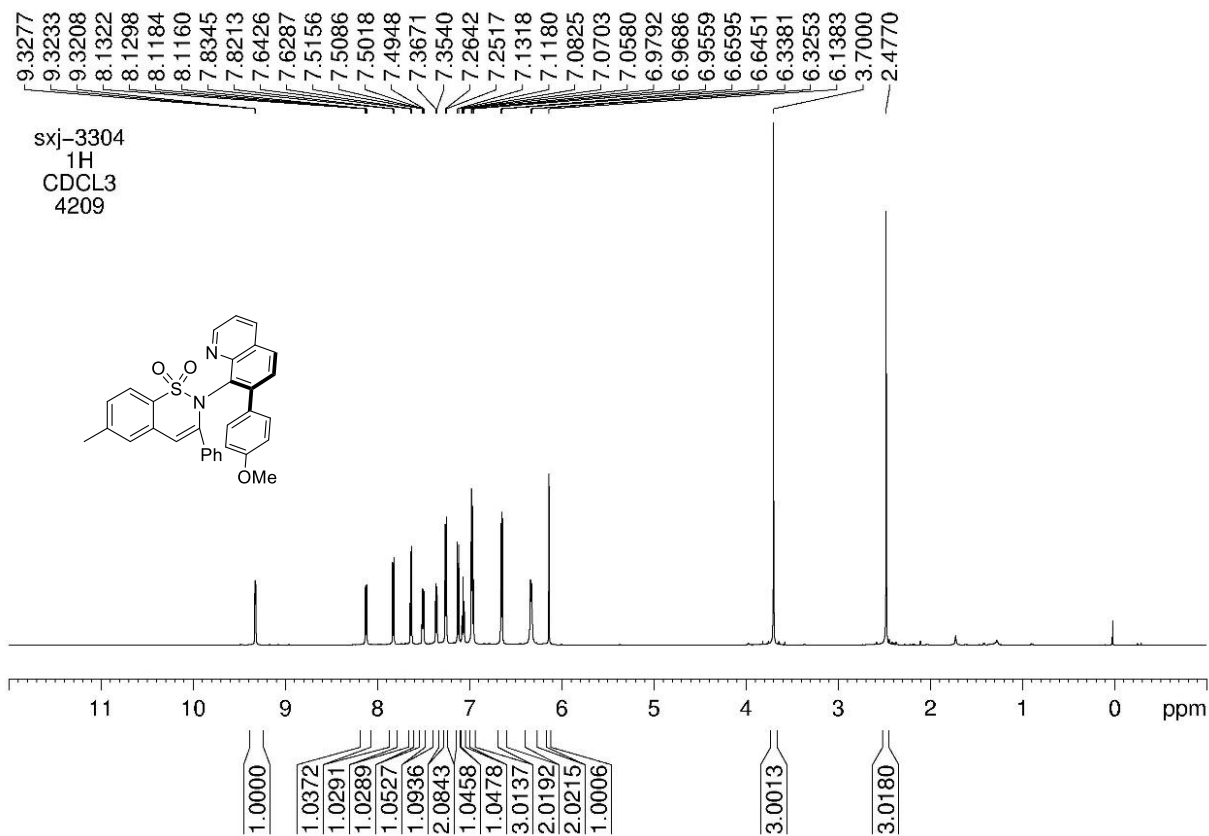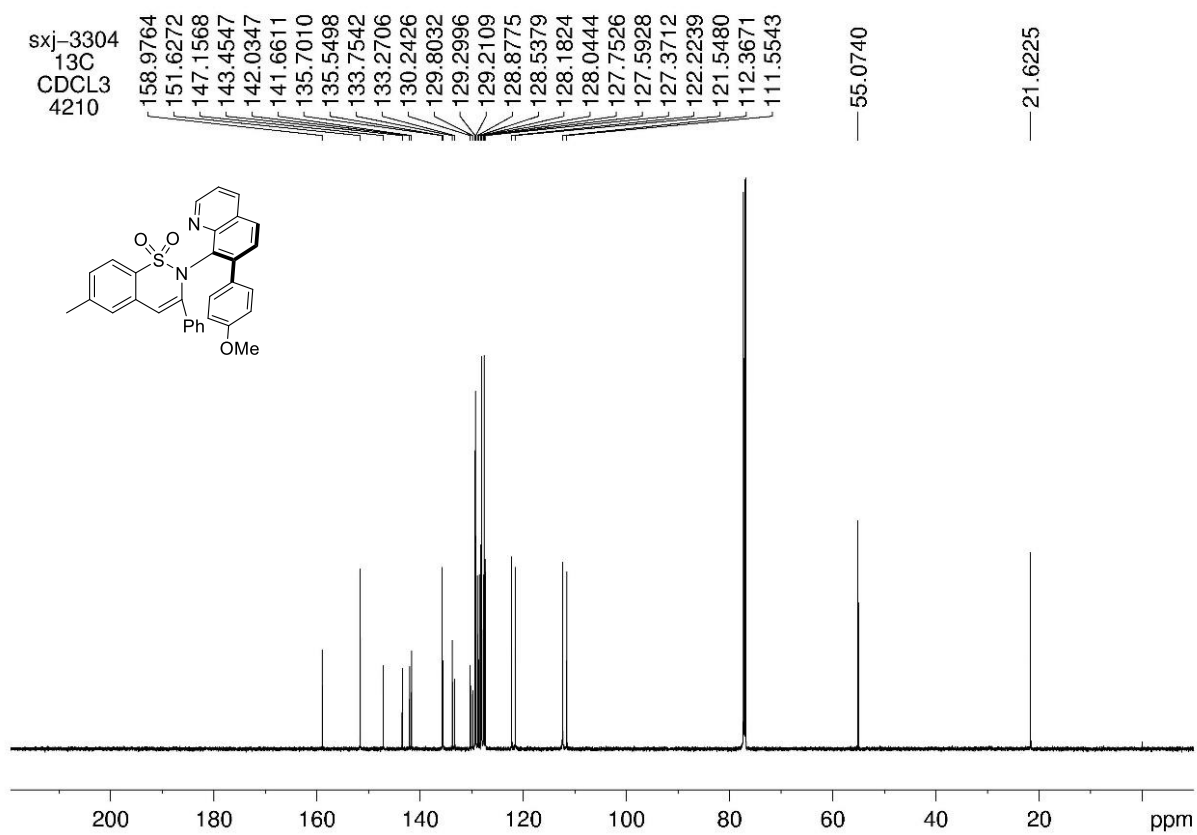



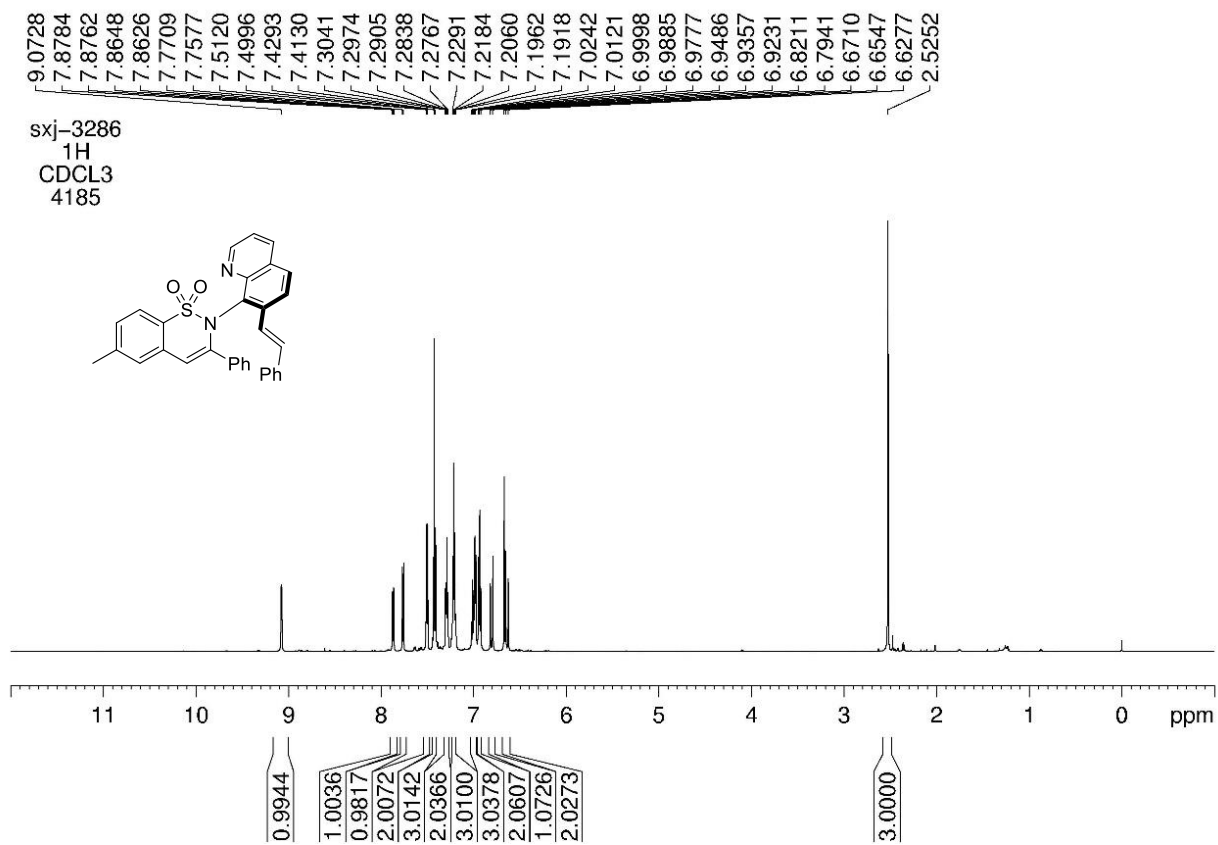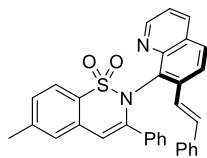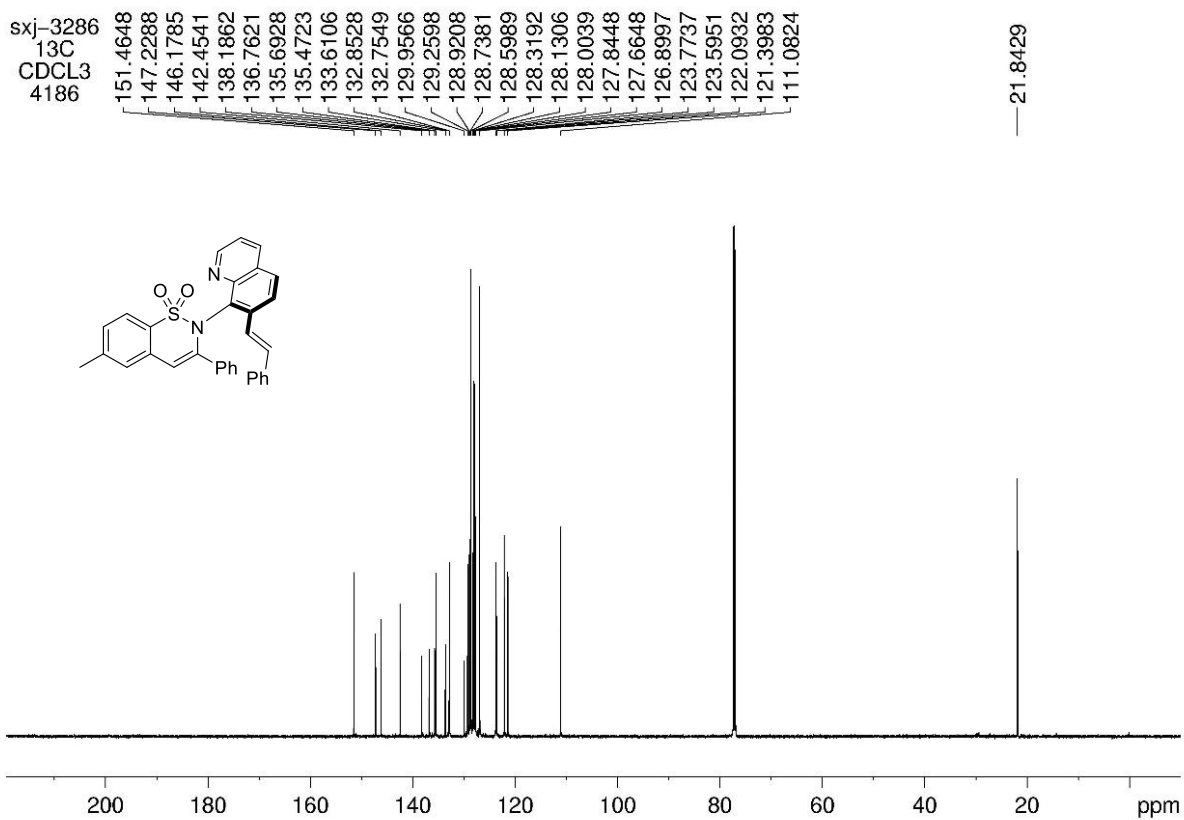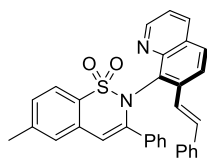

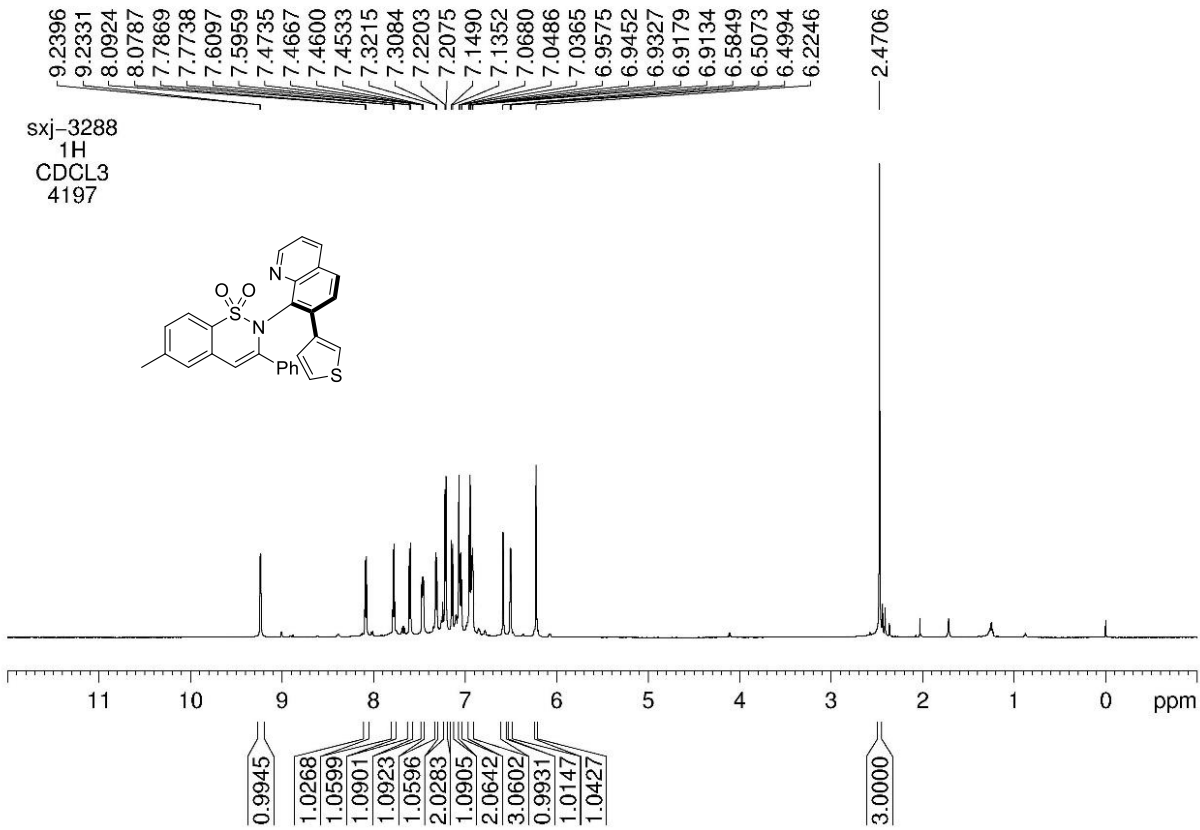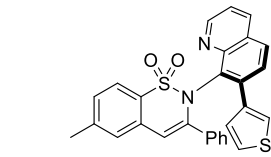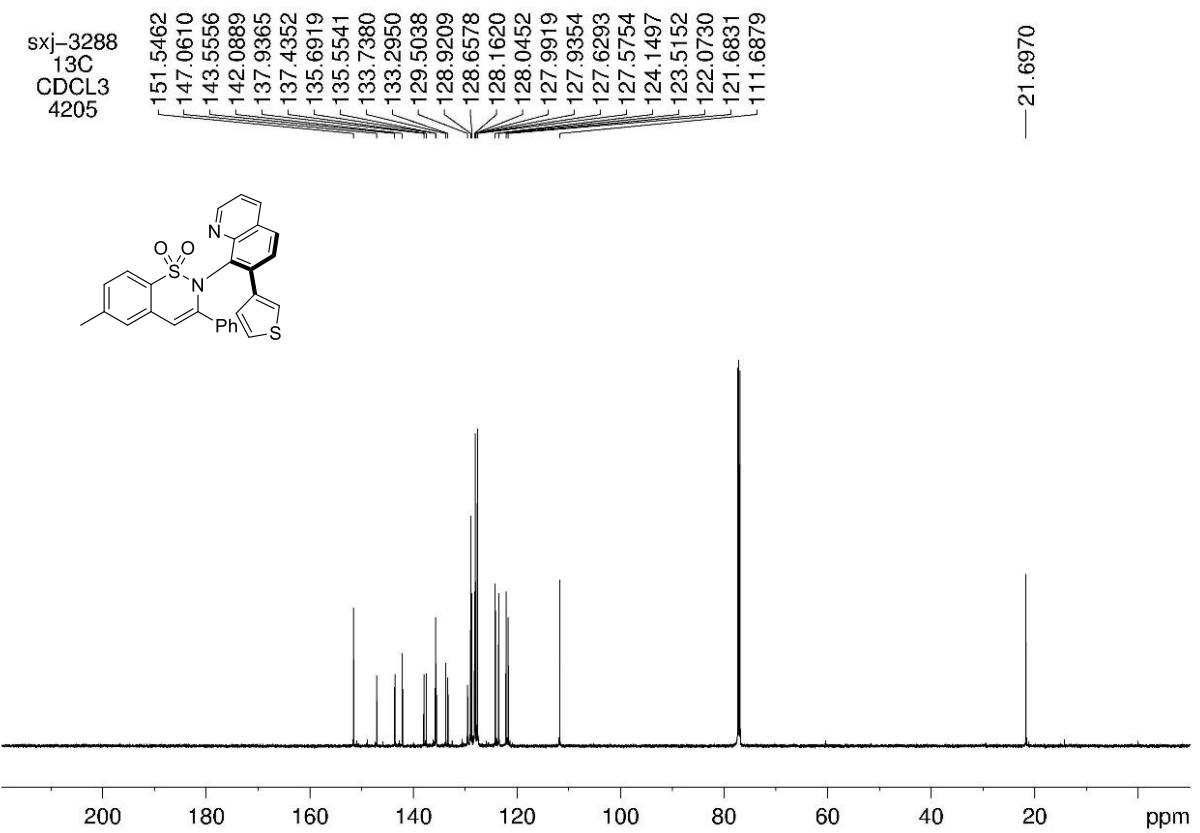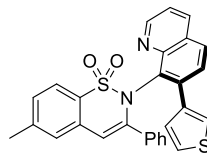

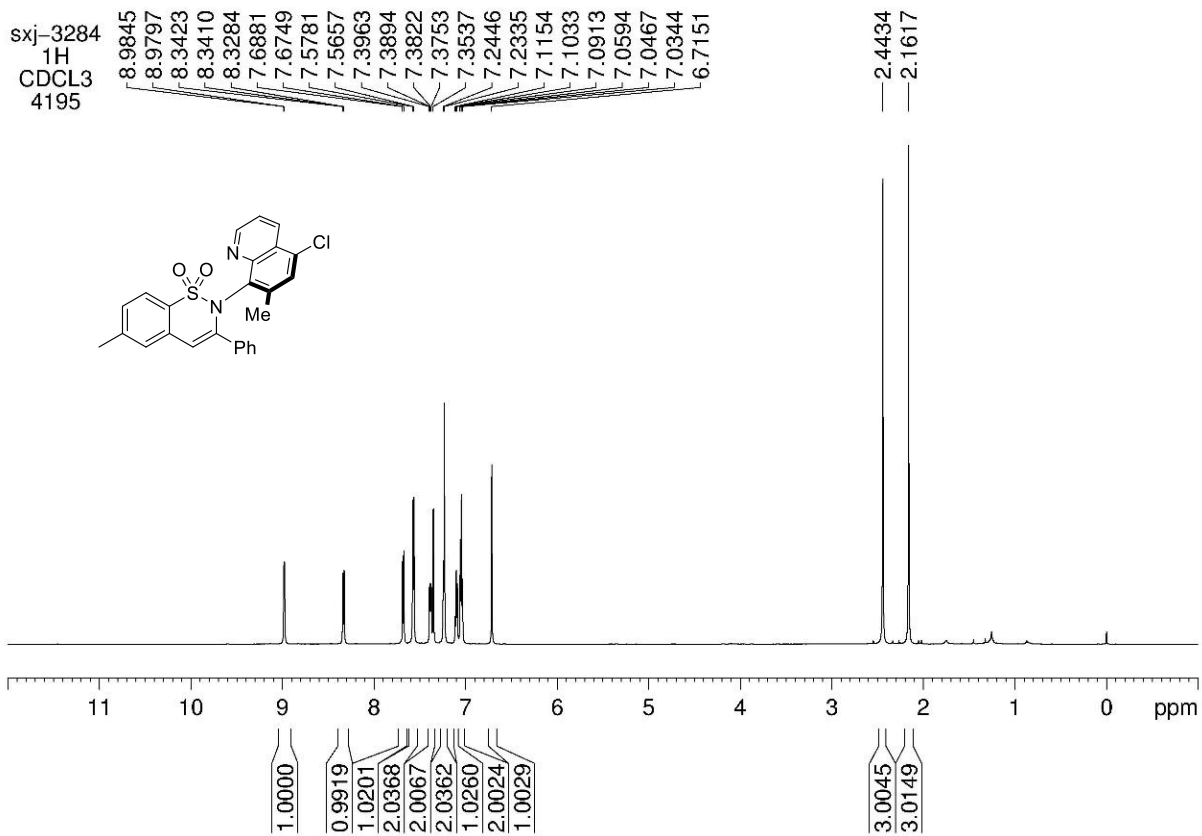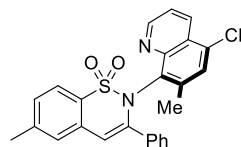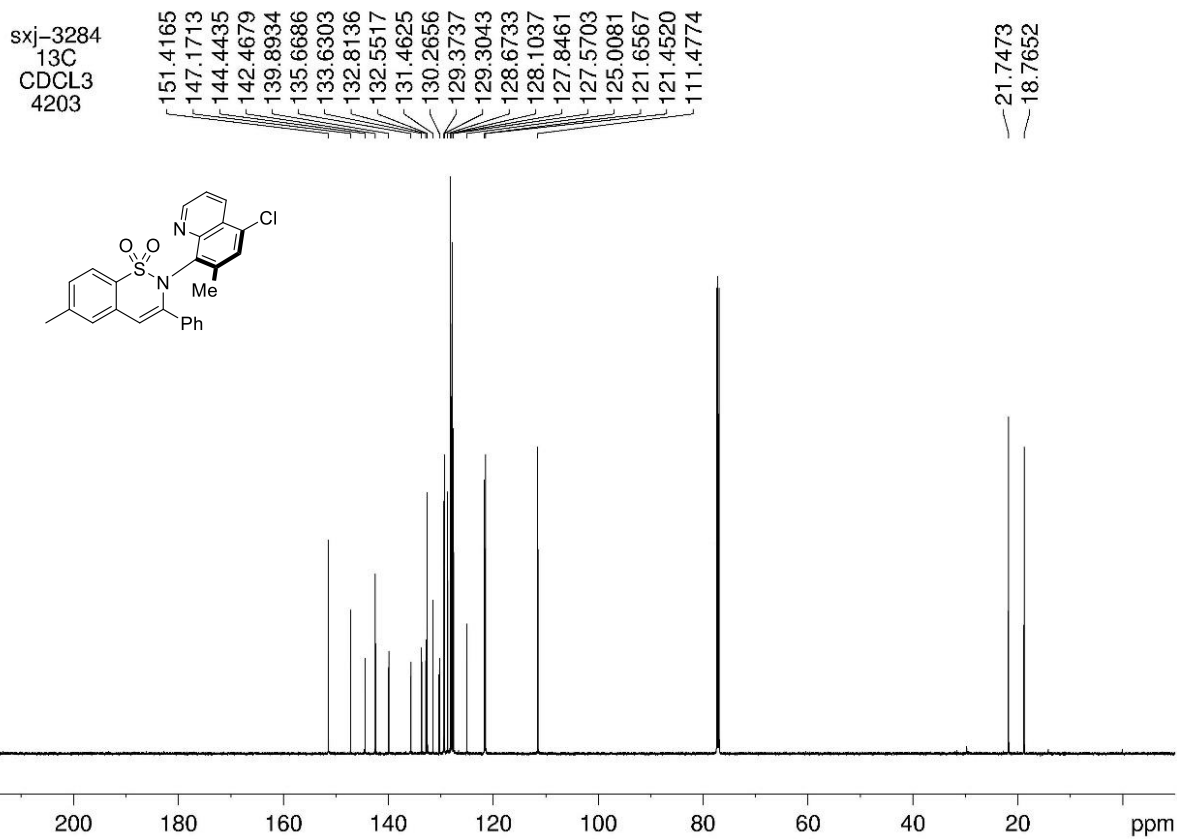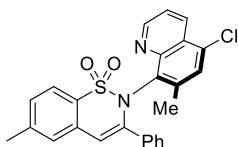

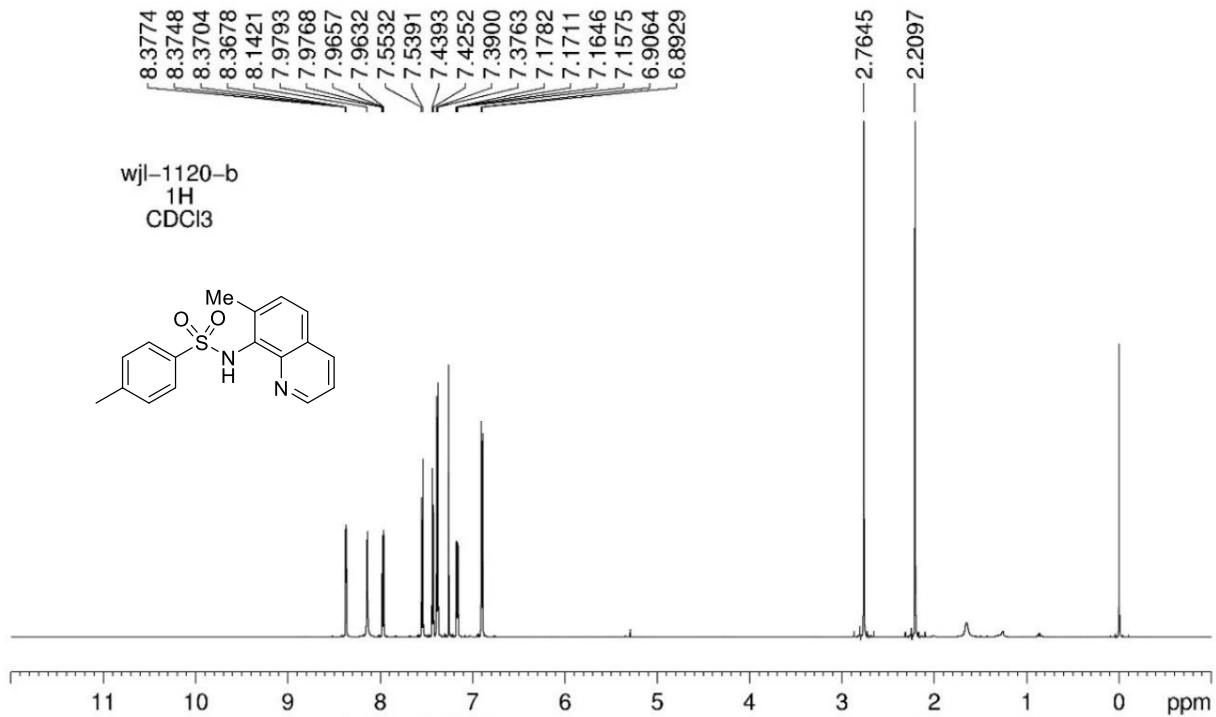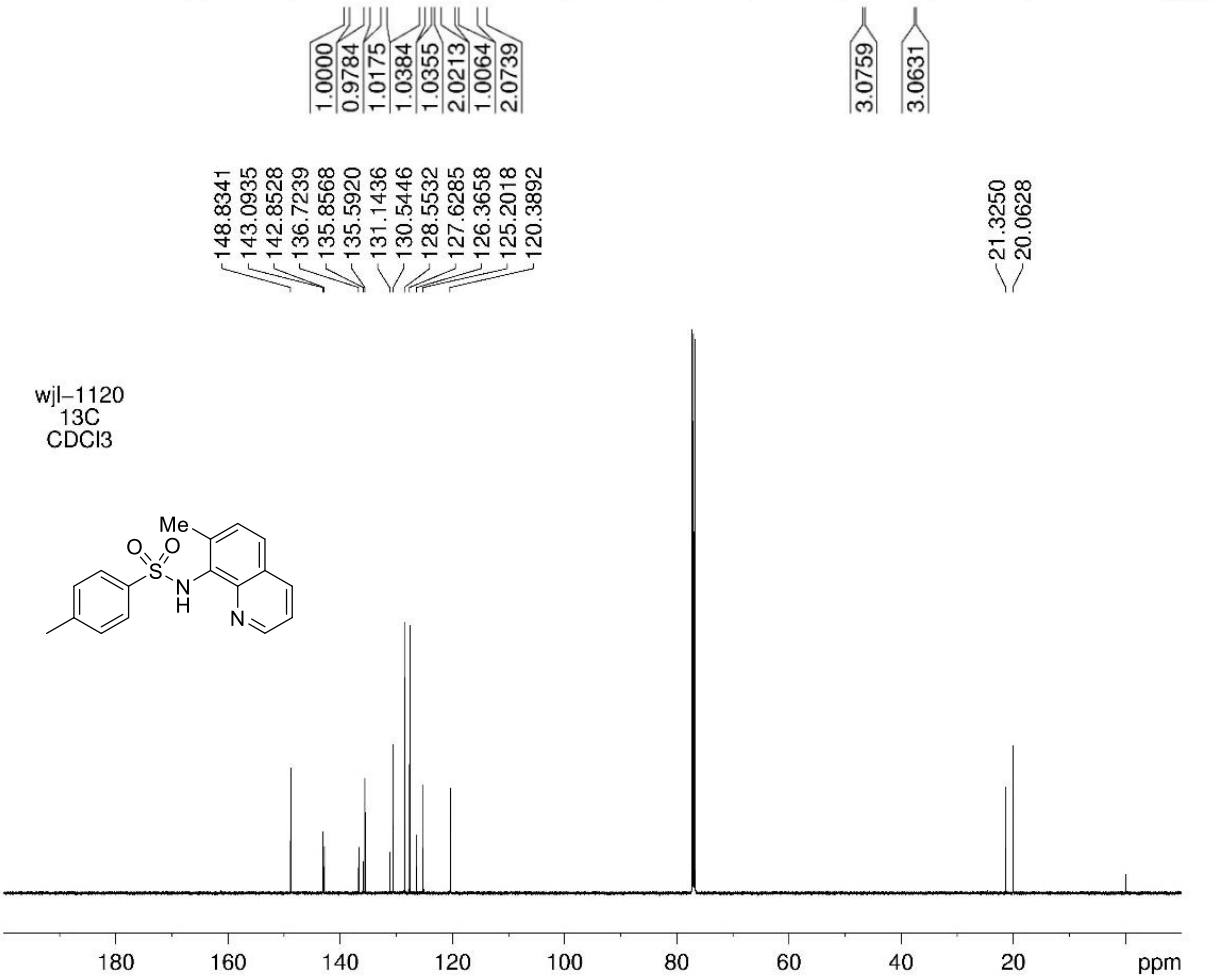

ZXF-H32  
13C  
CDCL3

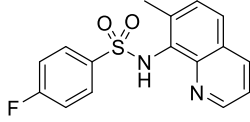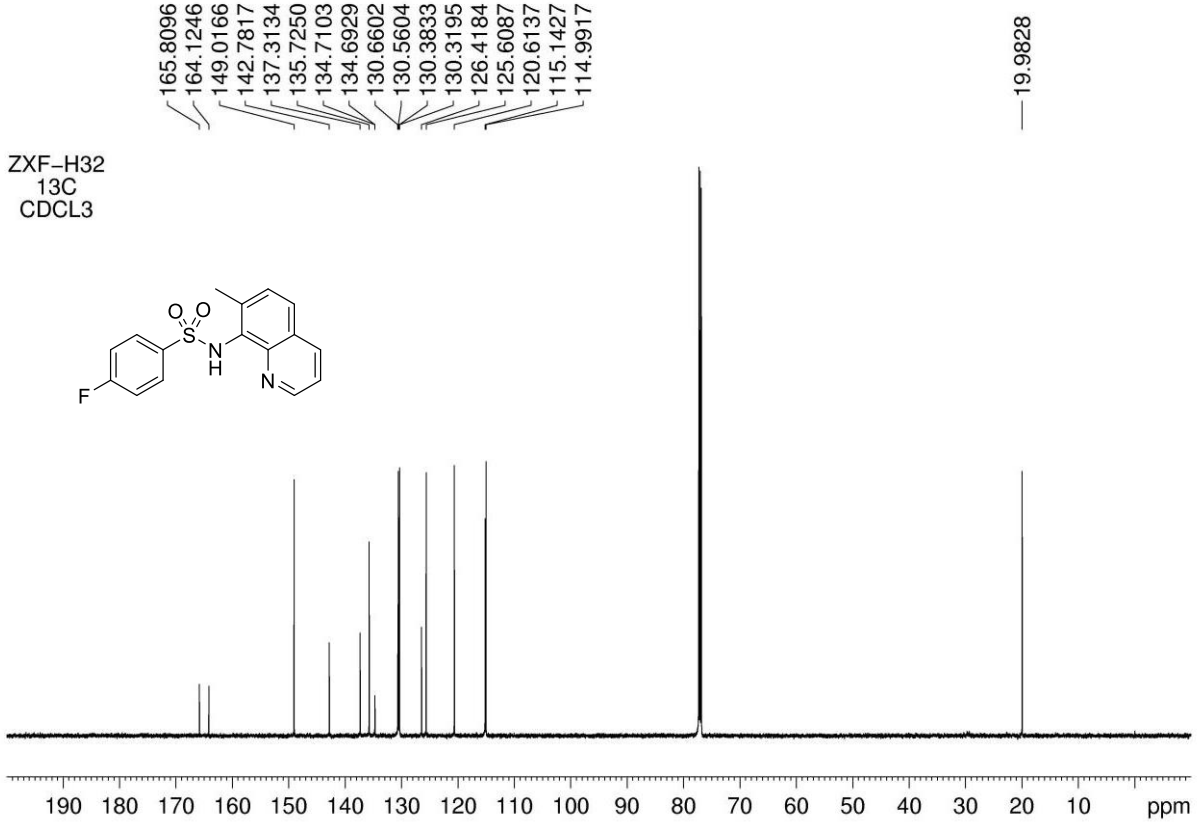

zxf-H32  
1H  
CDCL3

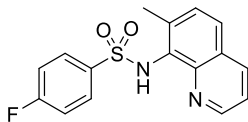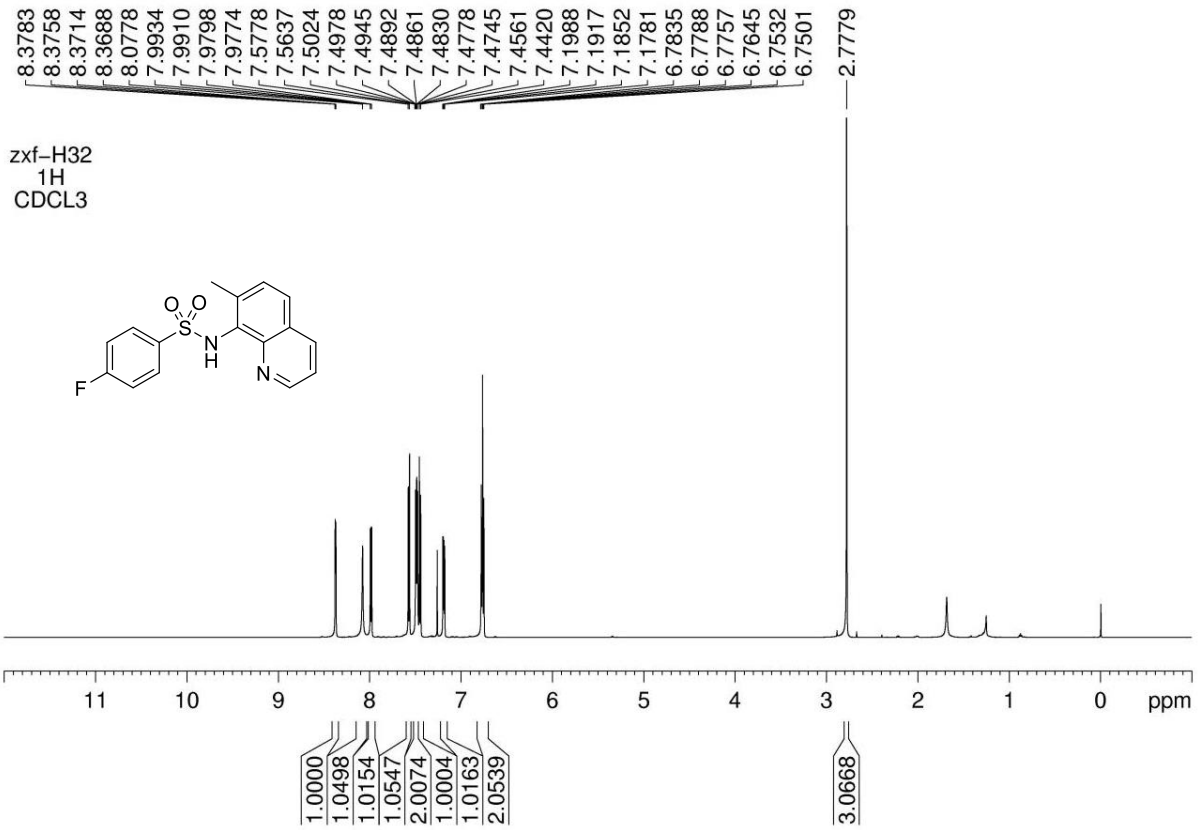

ZXF-H-32  
19F  
CDCL3

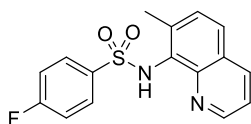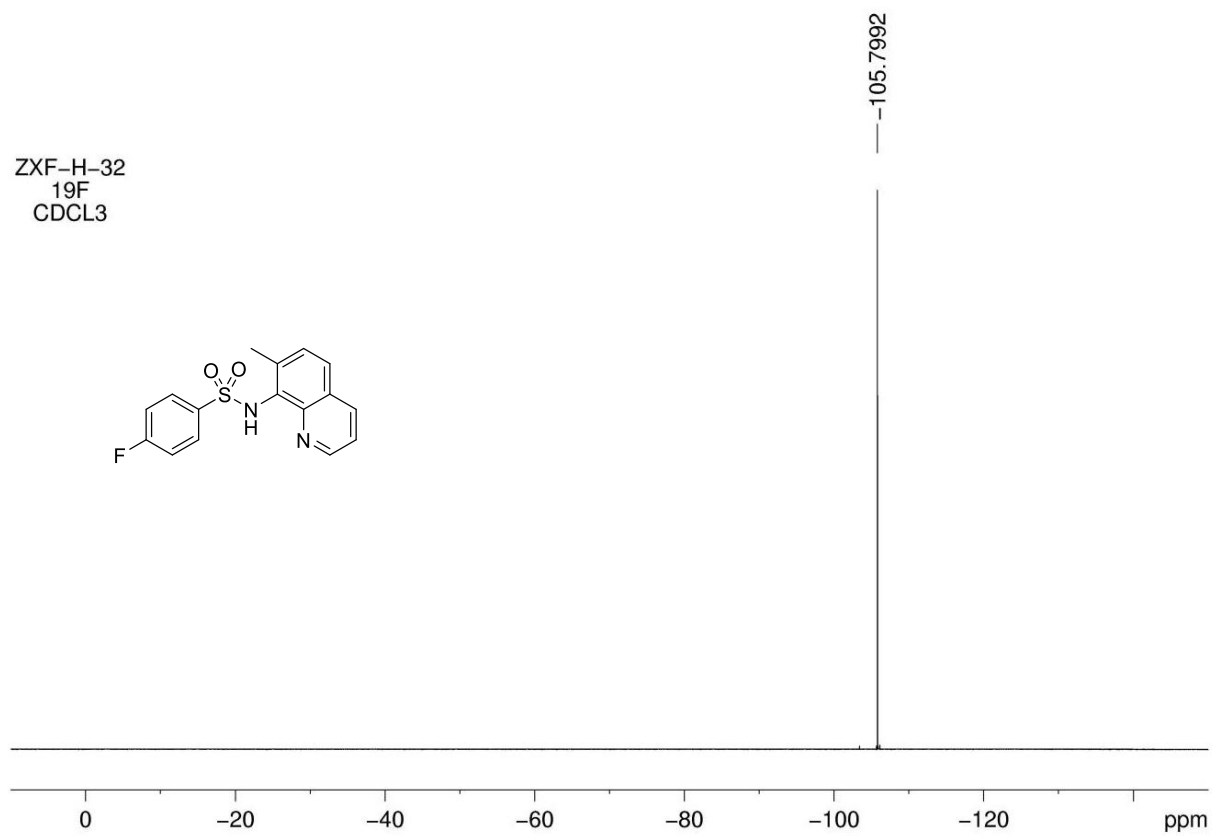

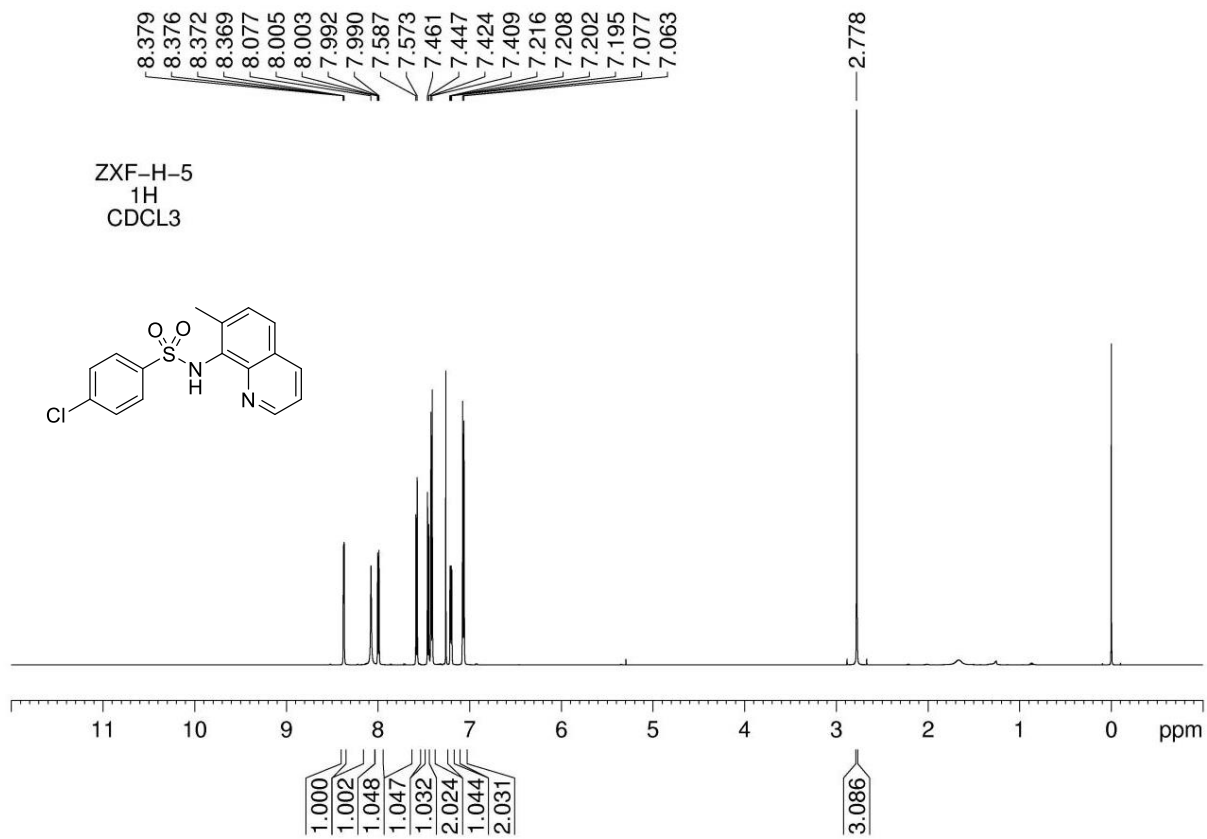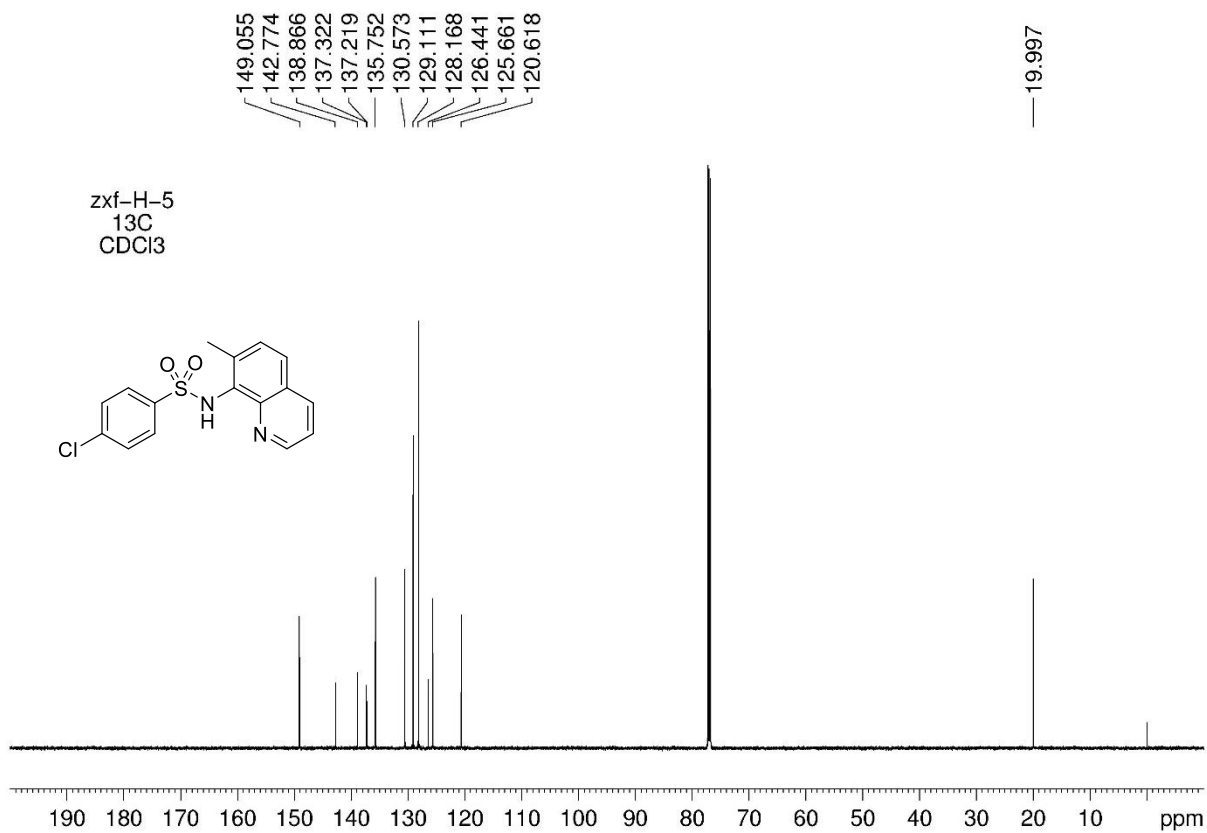

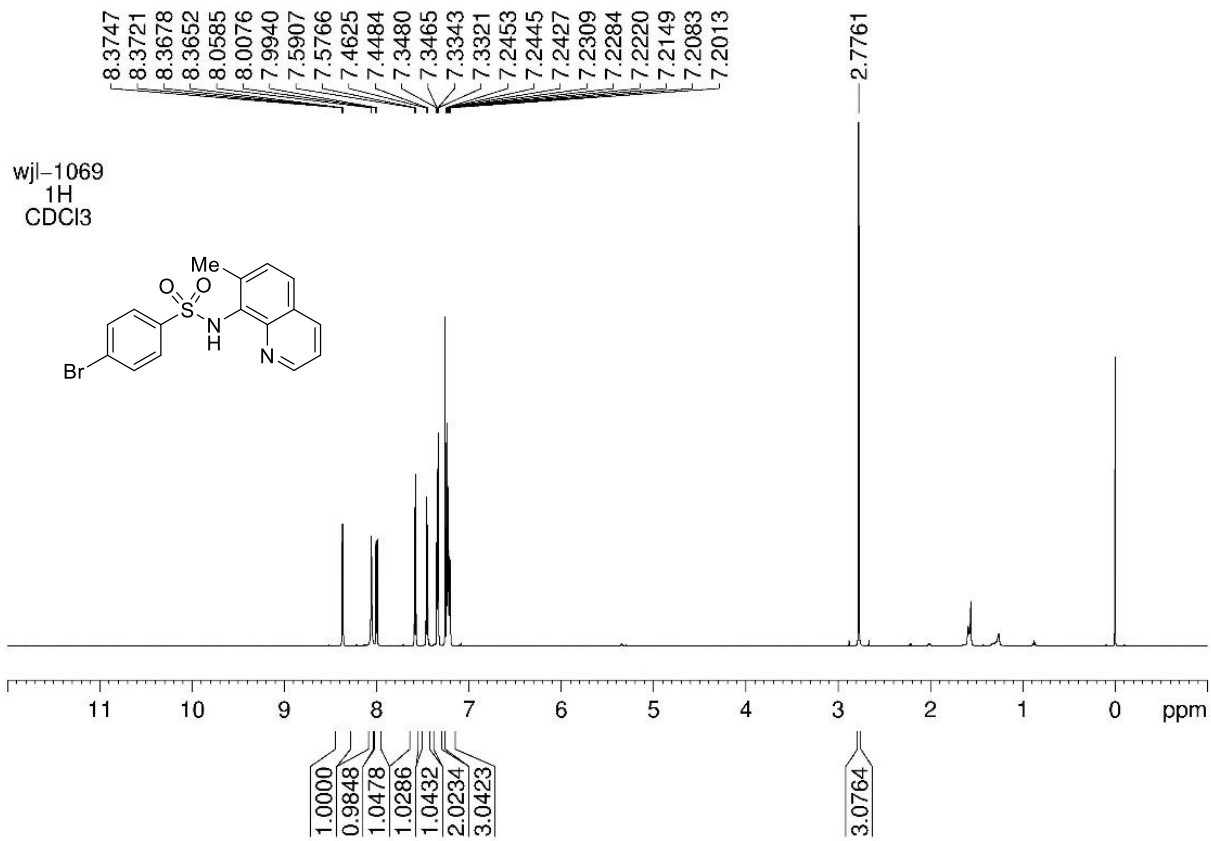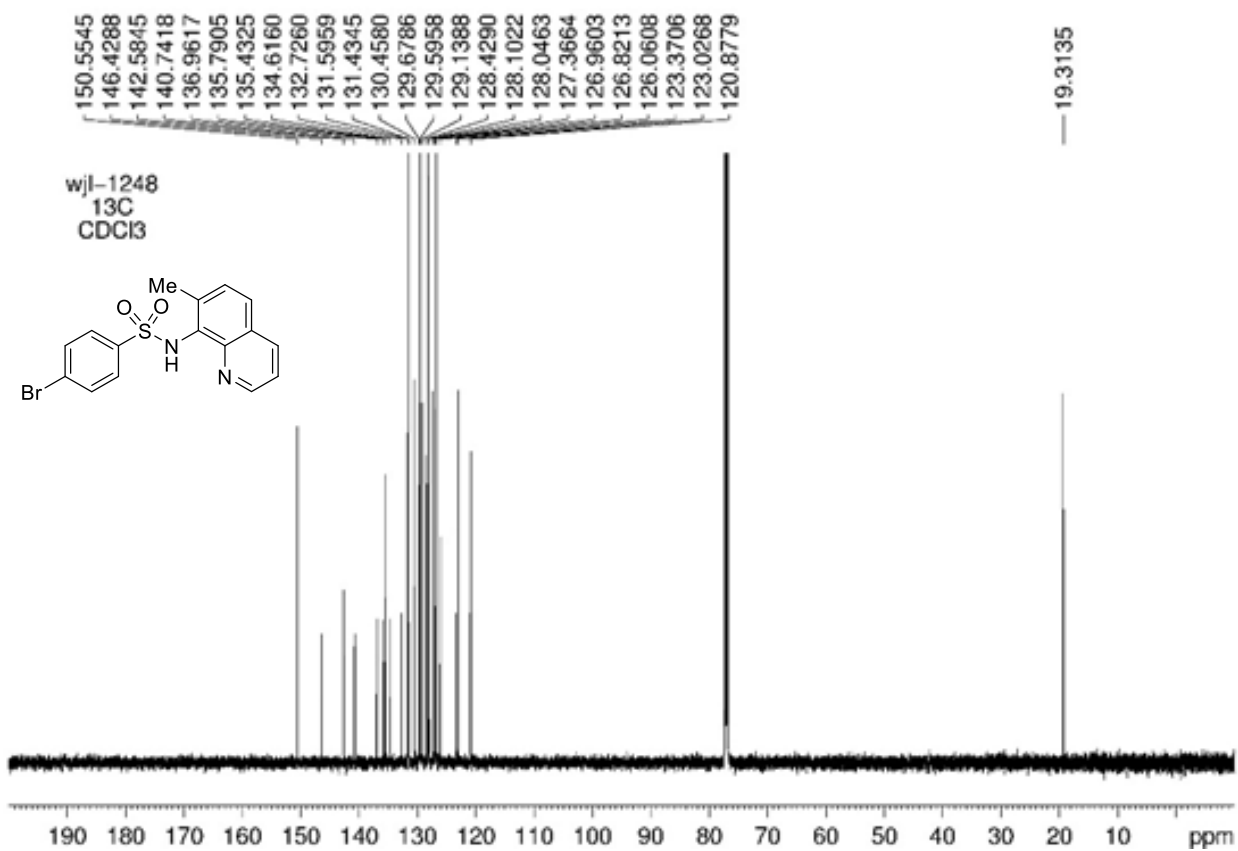



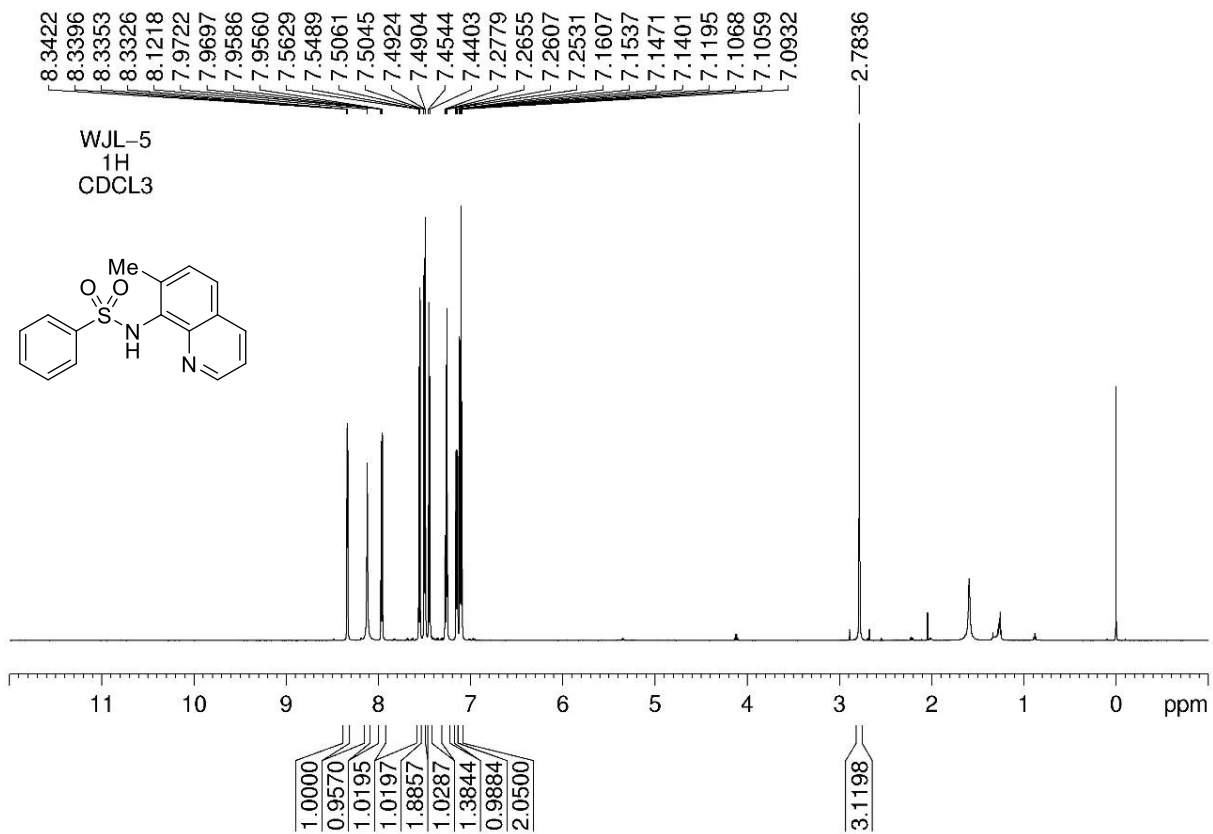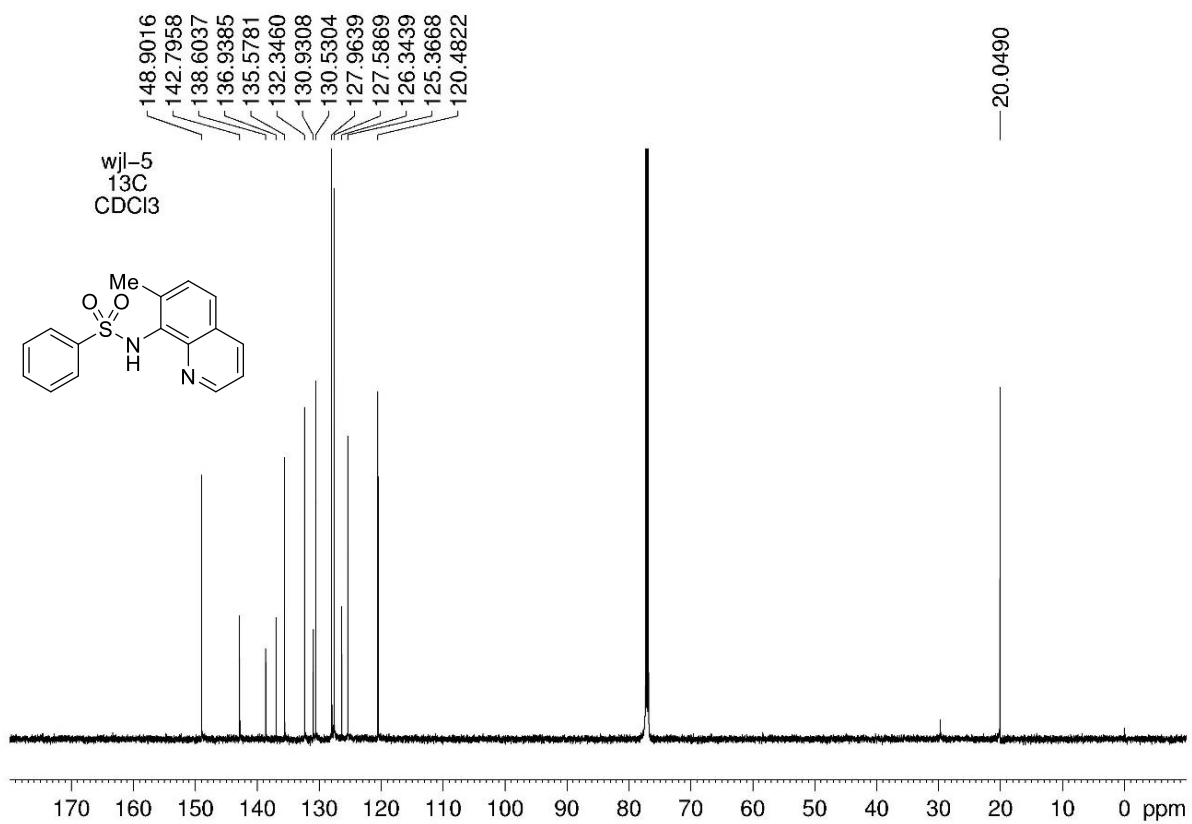

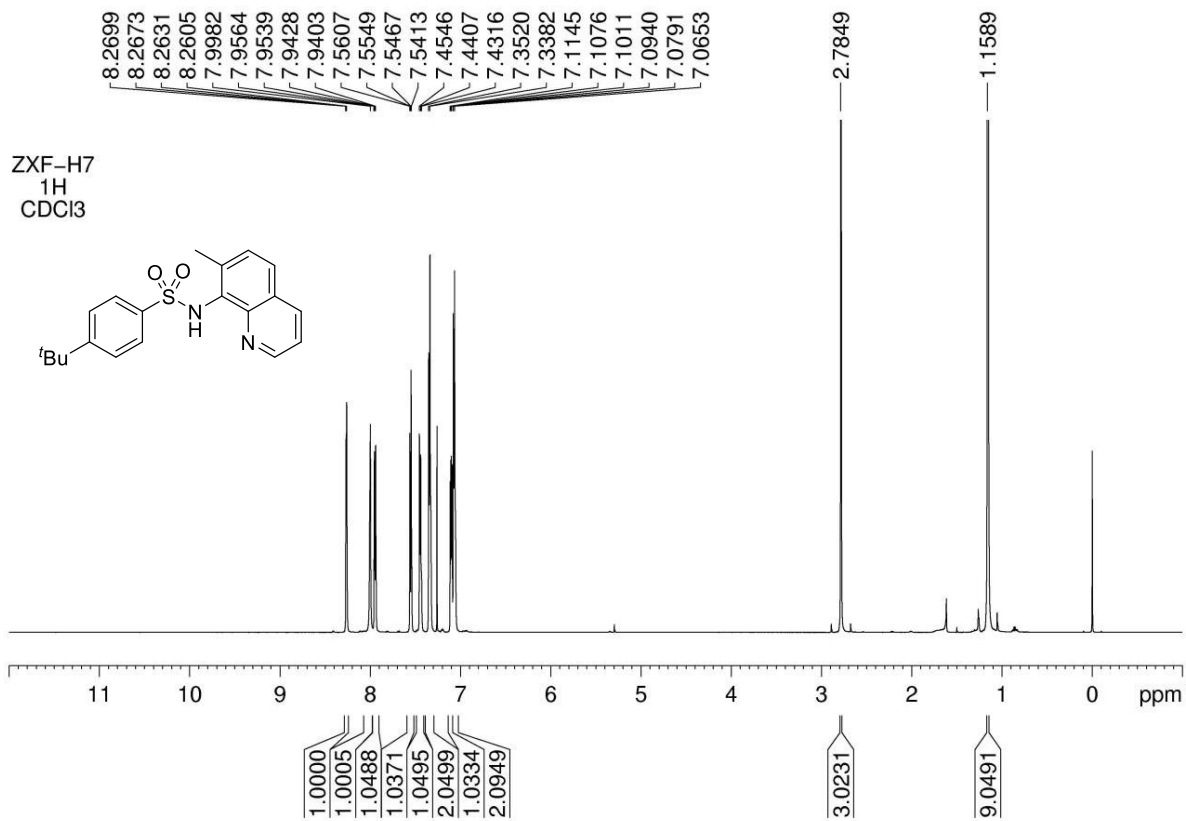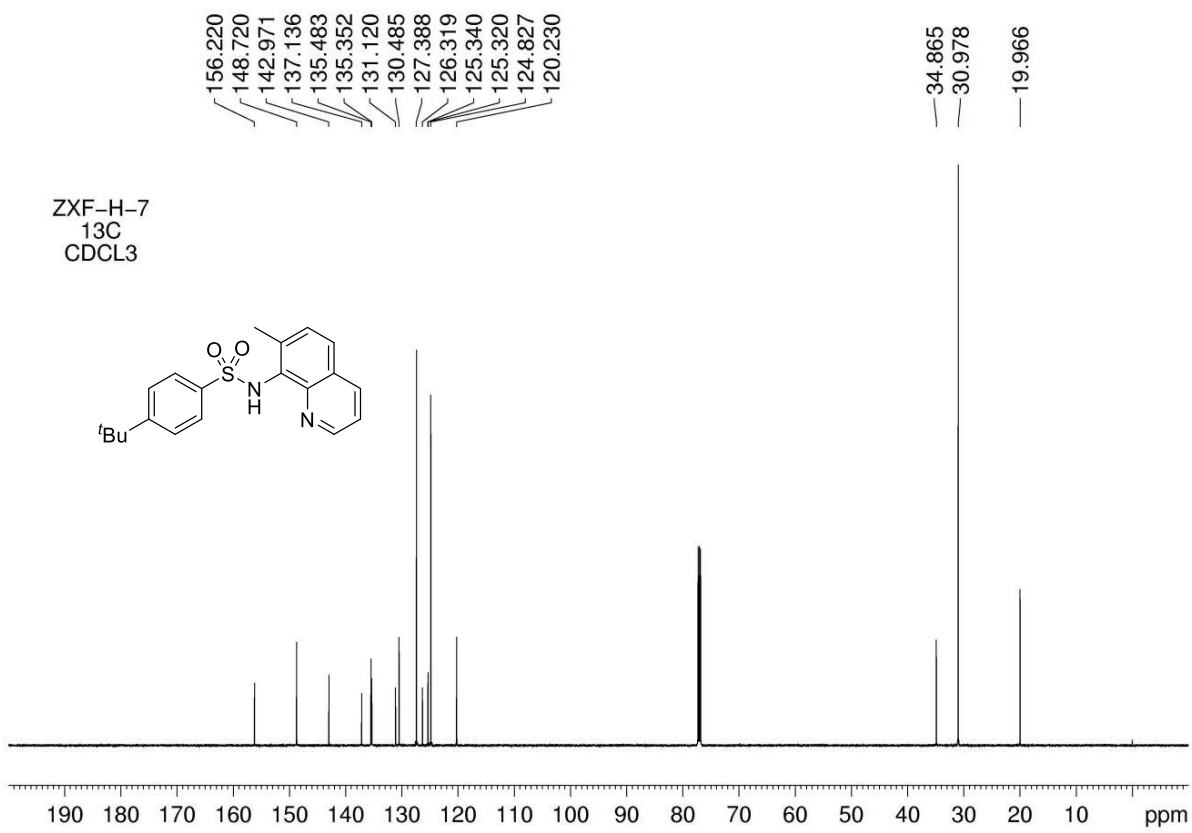

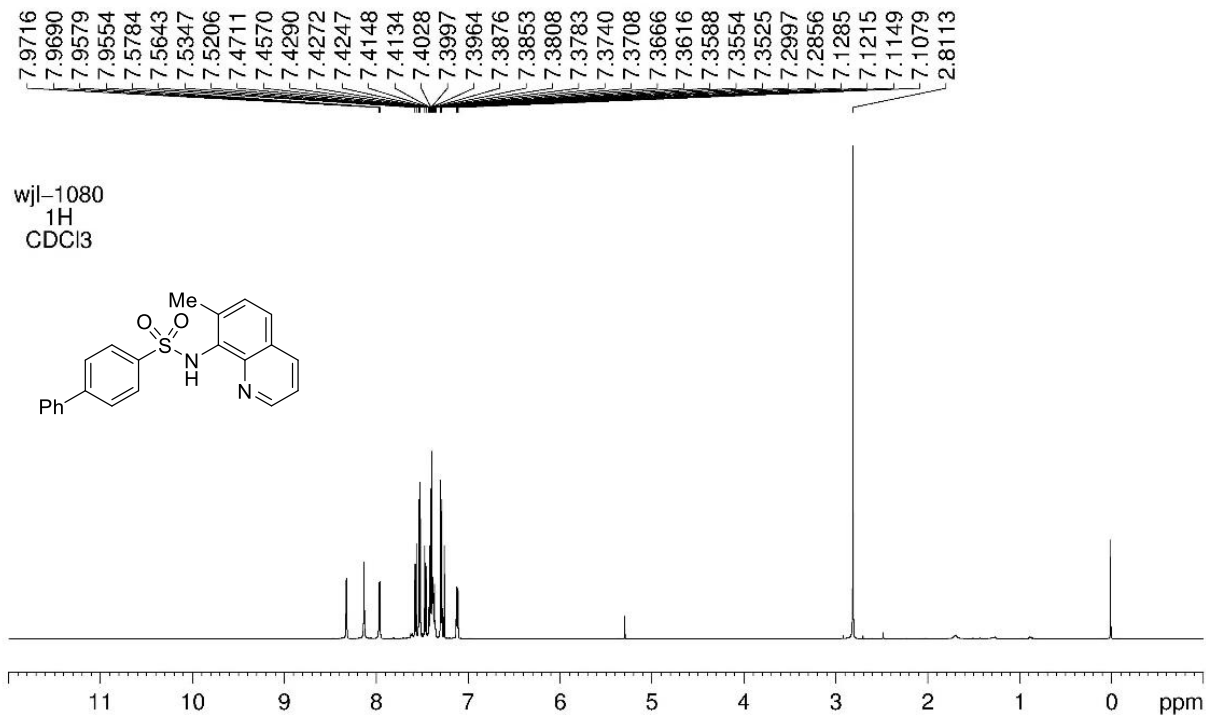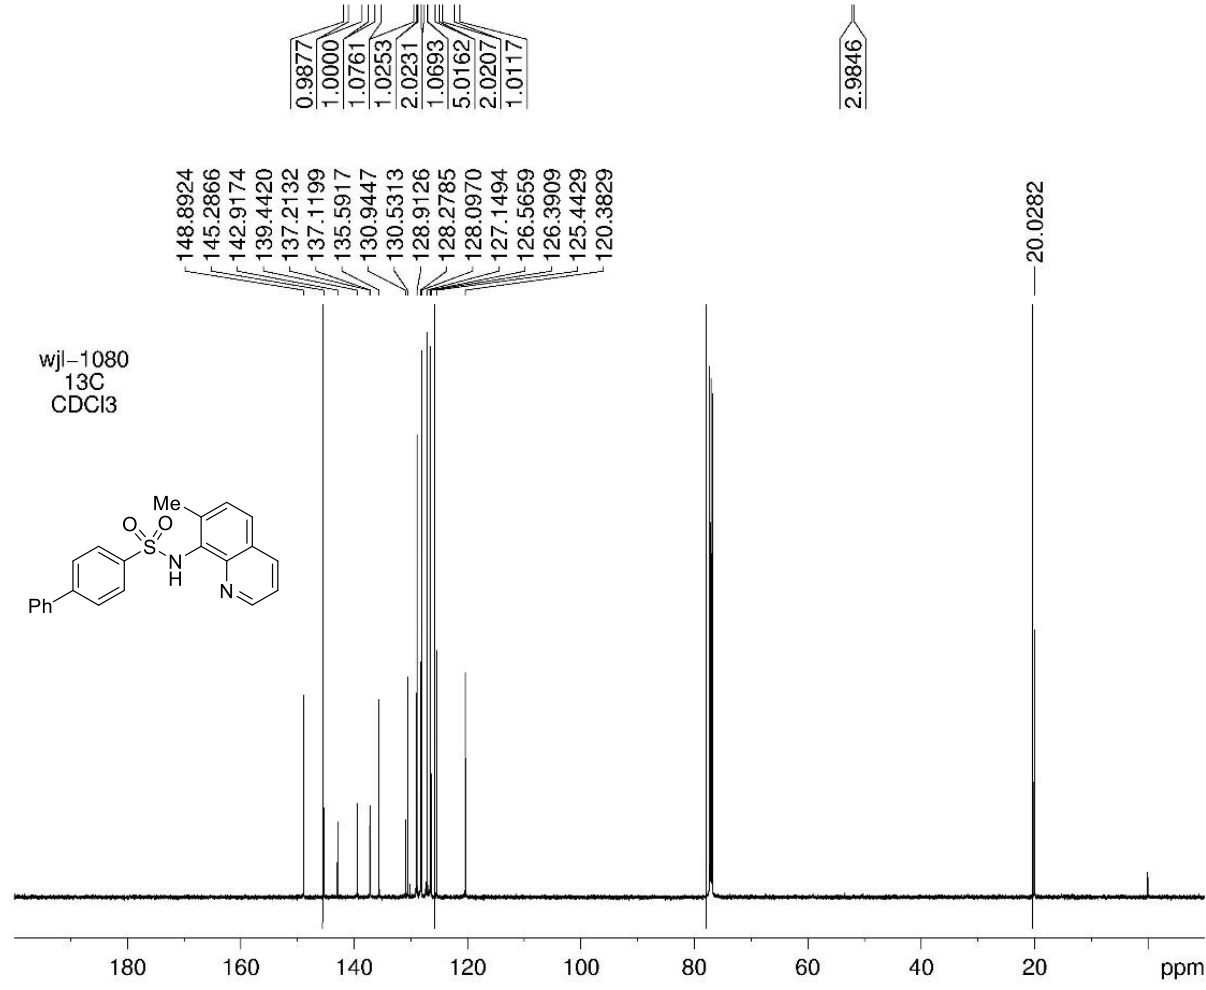

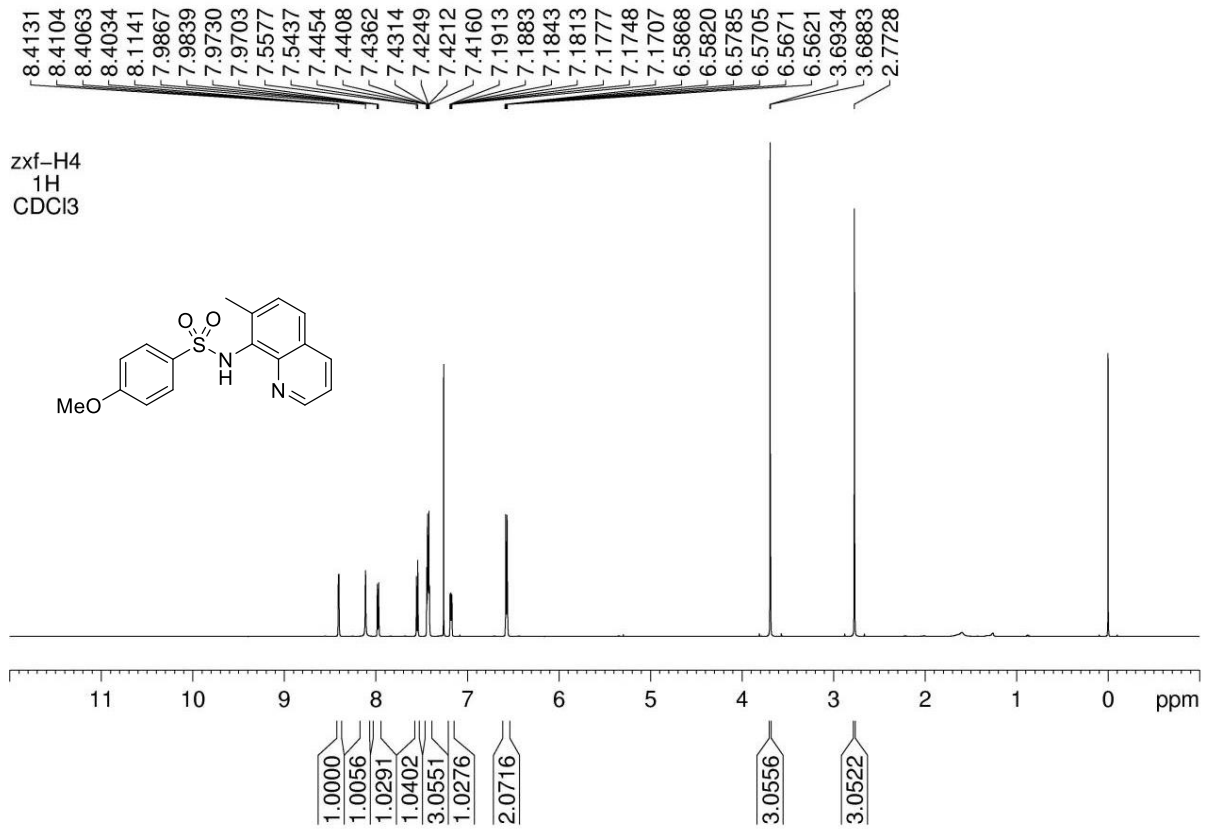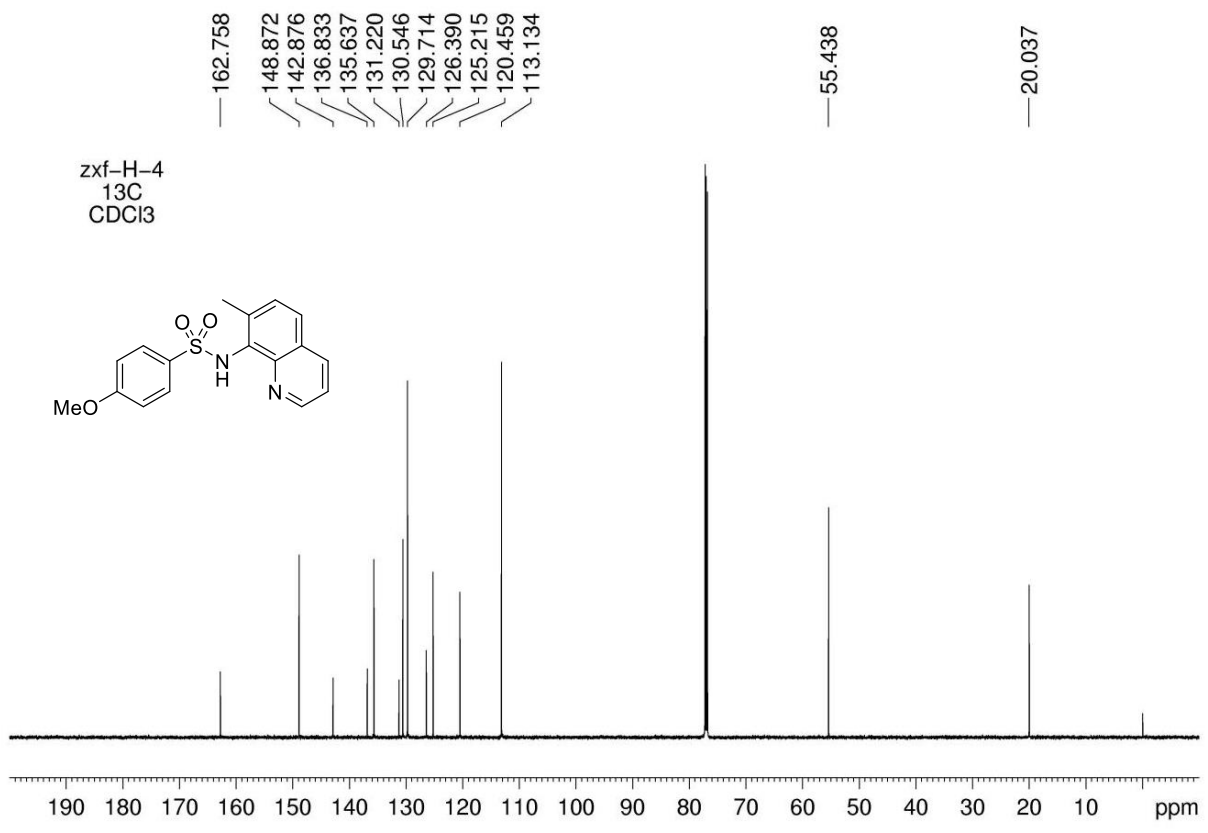

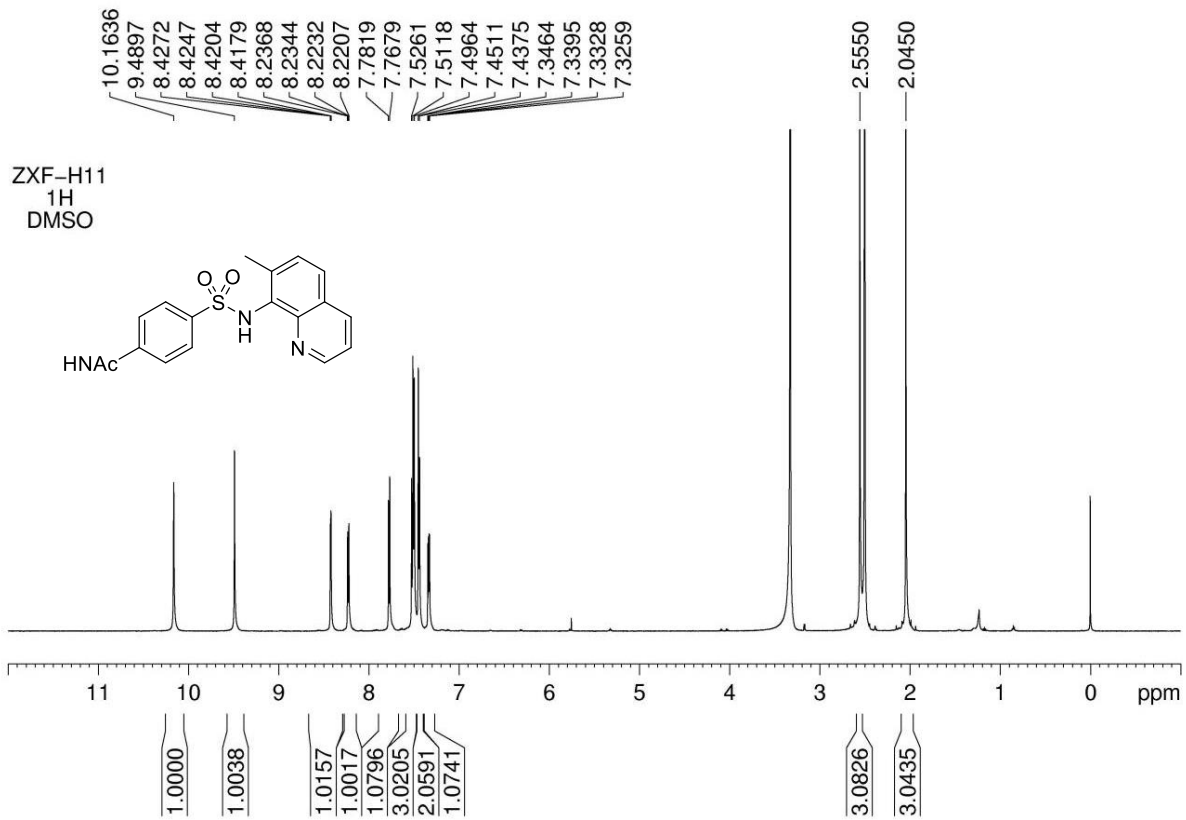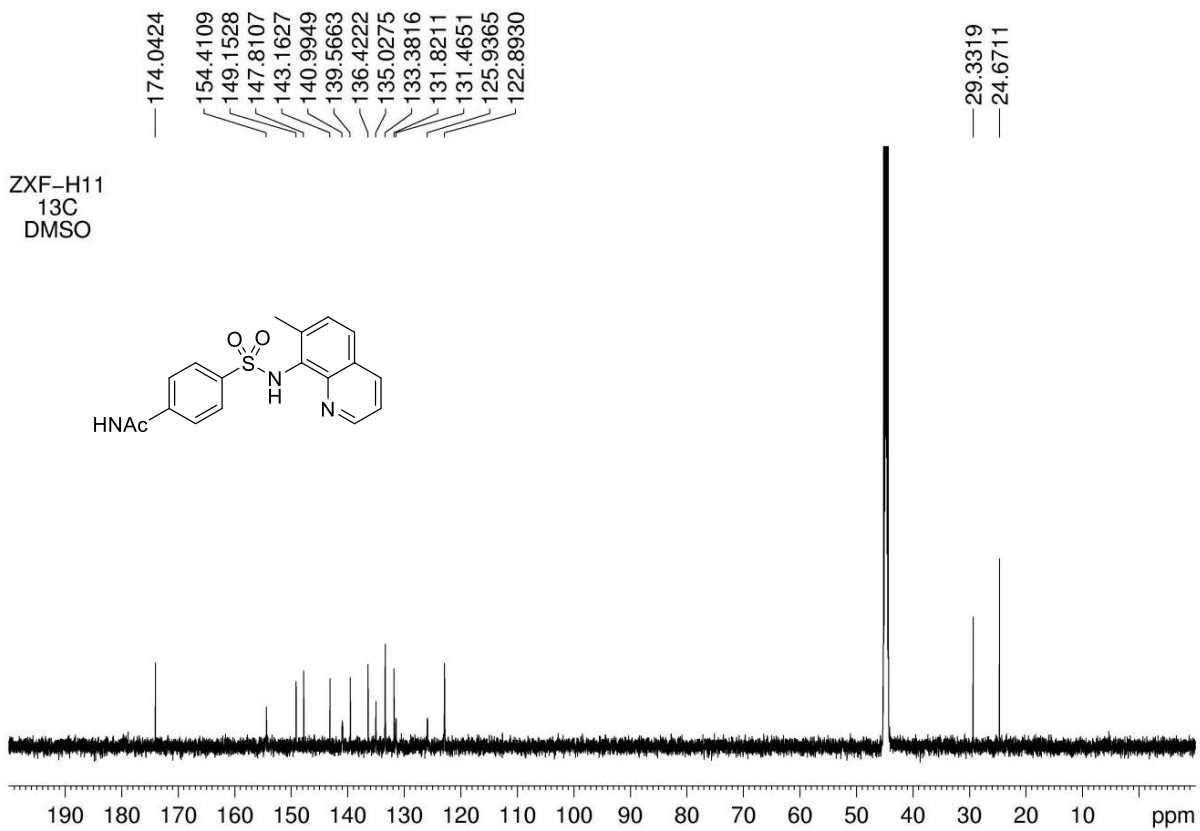

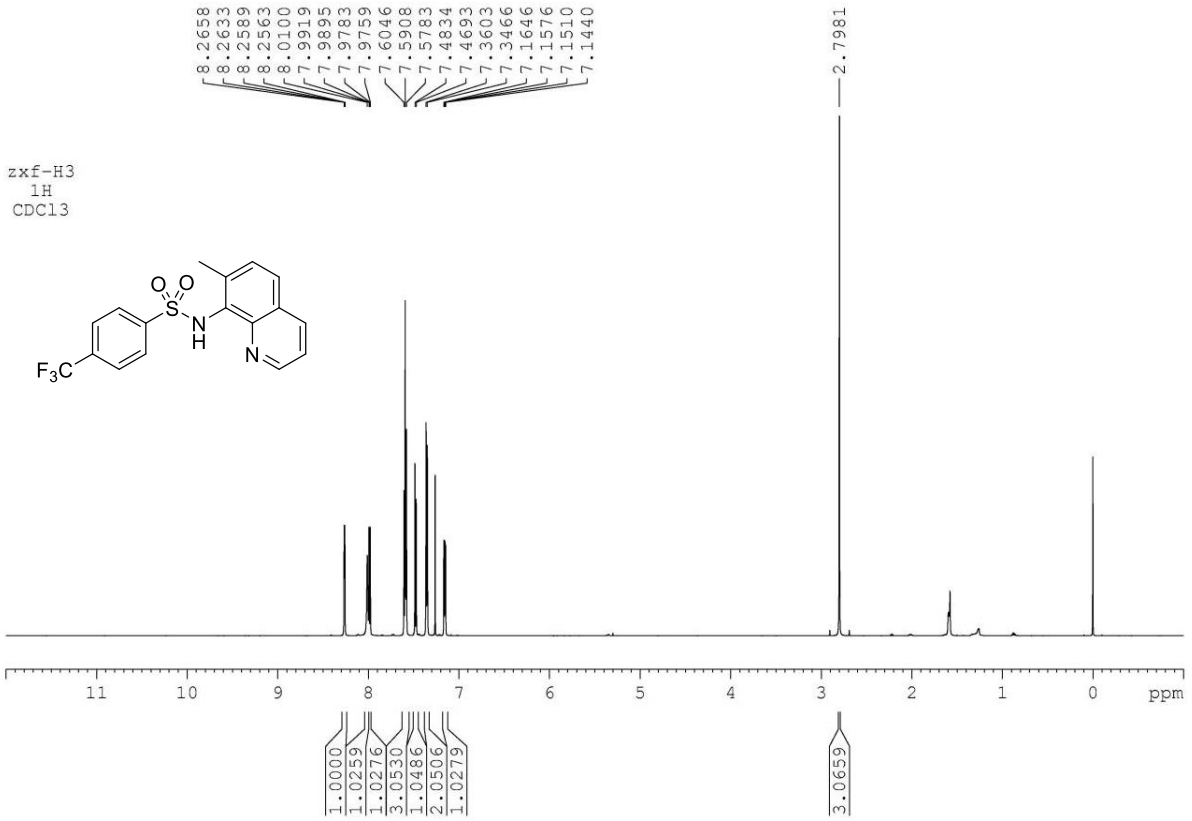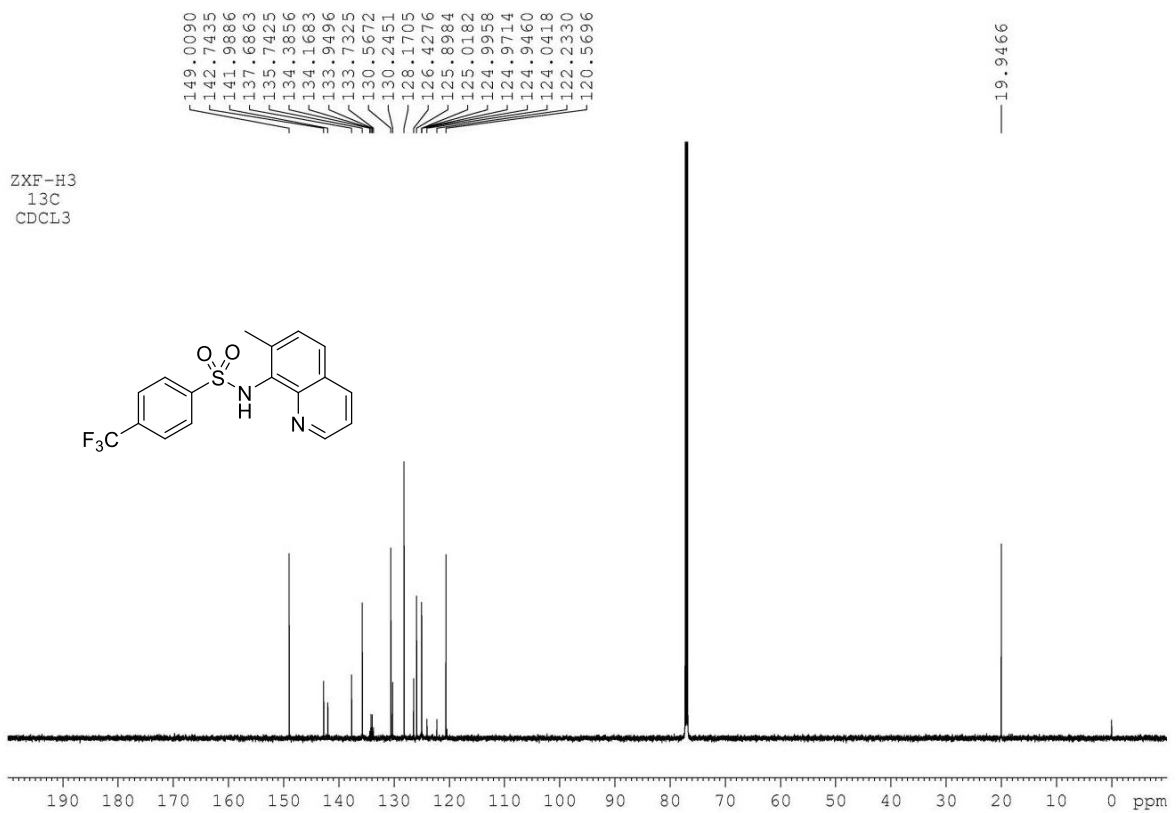

ZXF-H-3  
19F  
CDCl3

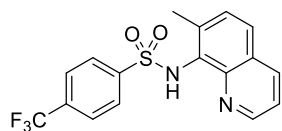

63.2473

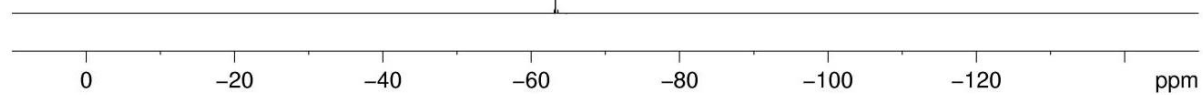

wjl-4  
1H  
CDCl3

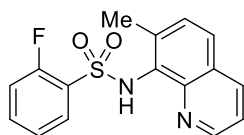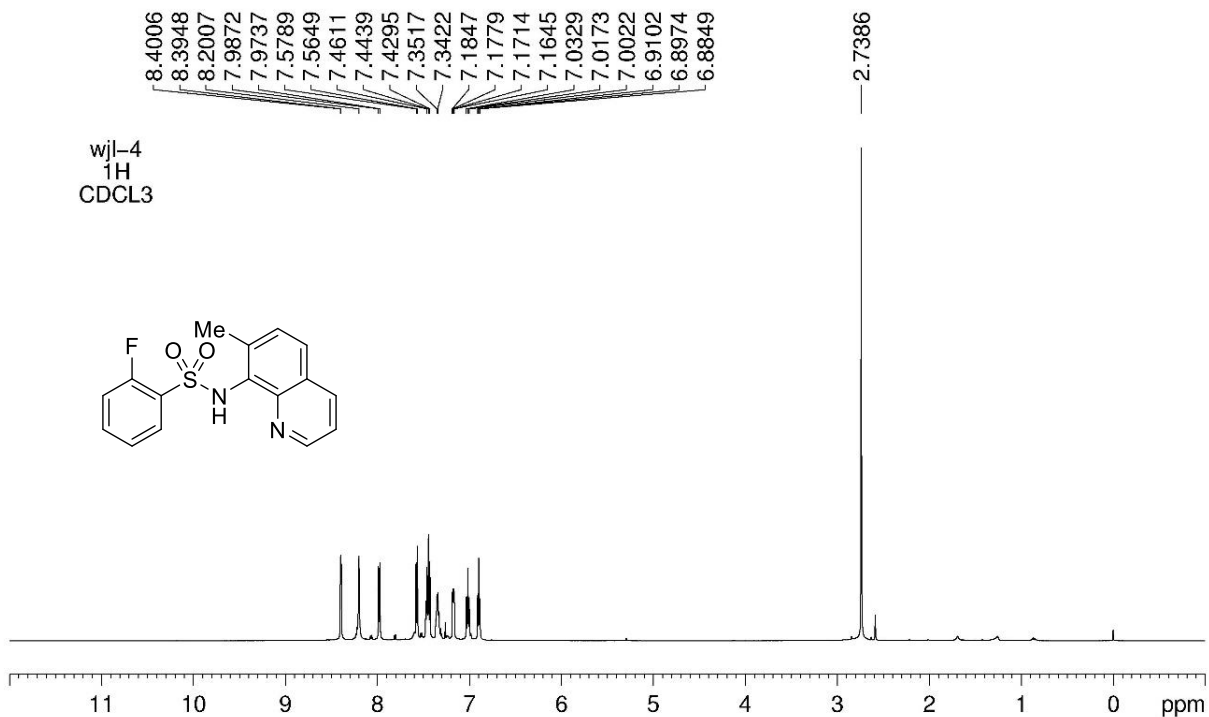

1.0000  
0.9705  
0.9736  
1.0319  
1.9954  
1.0428  
0.9827  
1.0567  
0.9945  
2.9913

wjl-4  
13C  
CDCl3

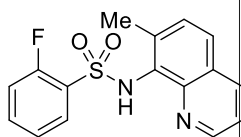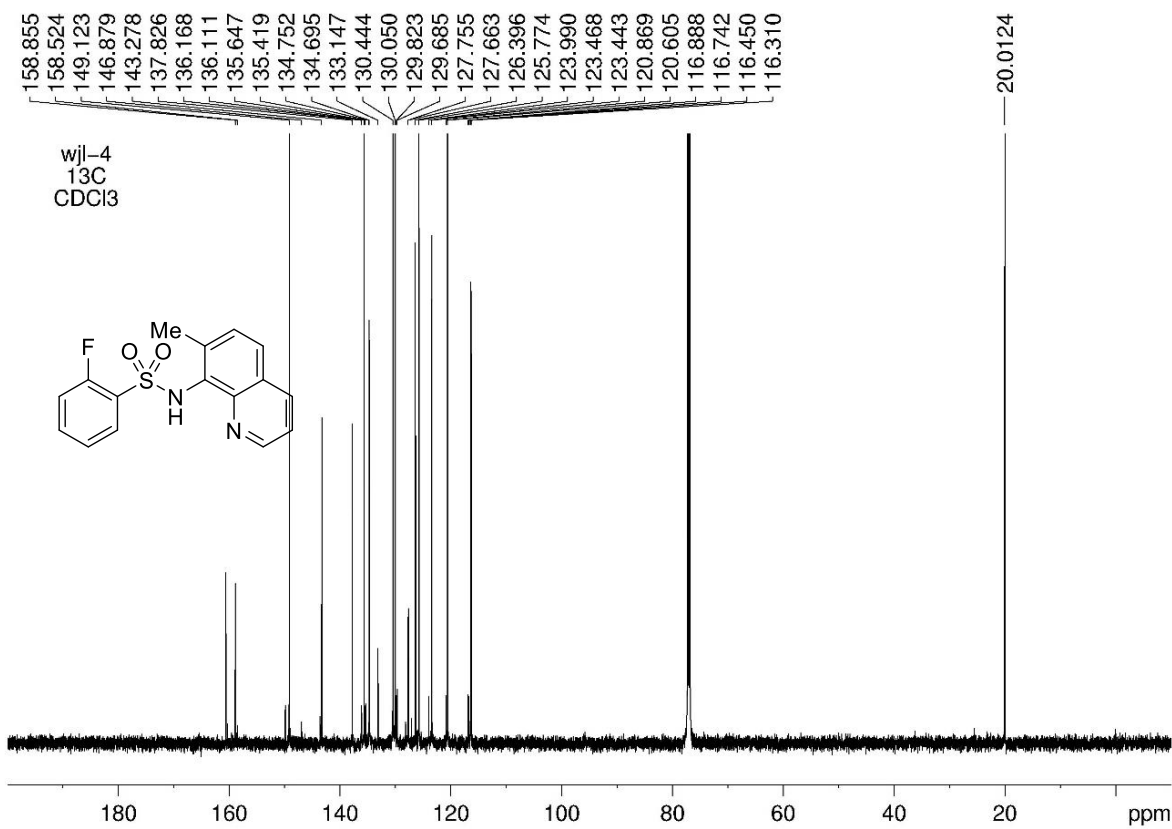



wjl-4  
19F  
CDCL3

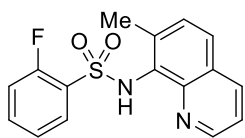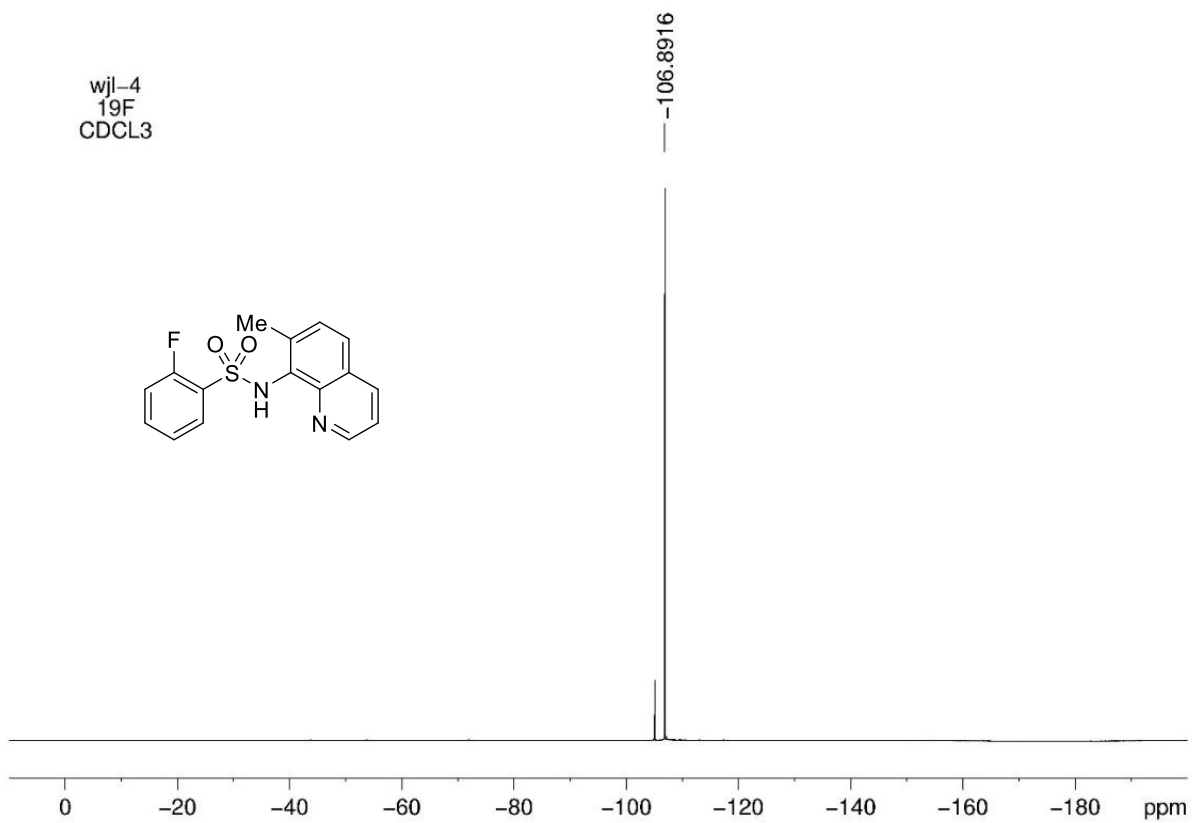

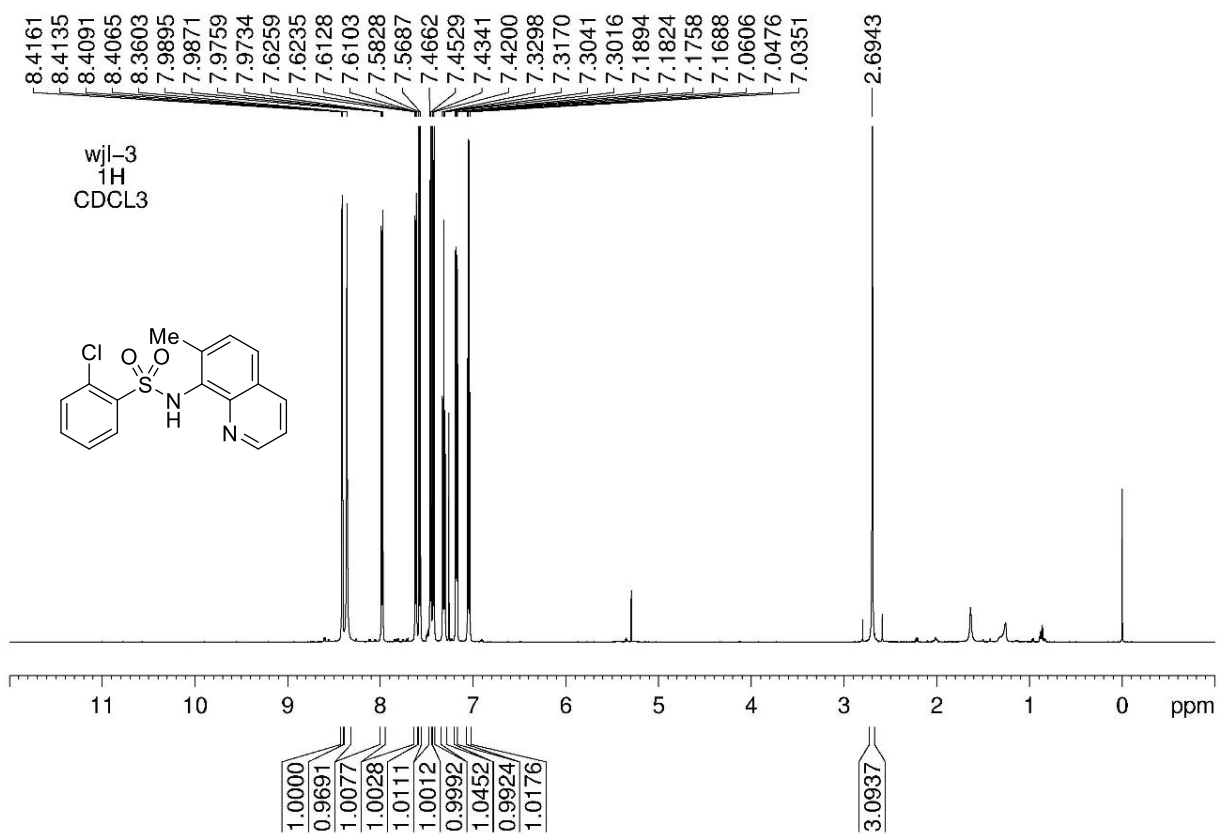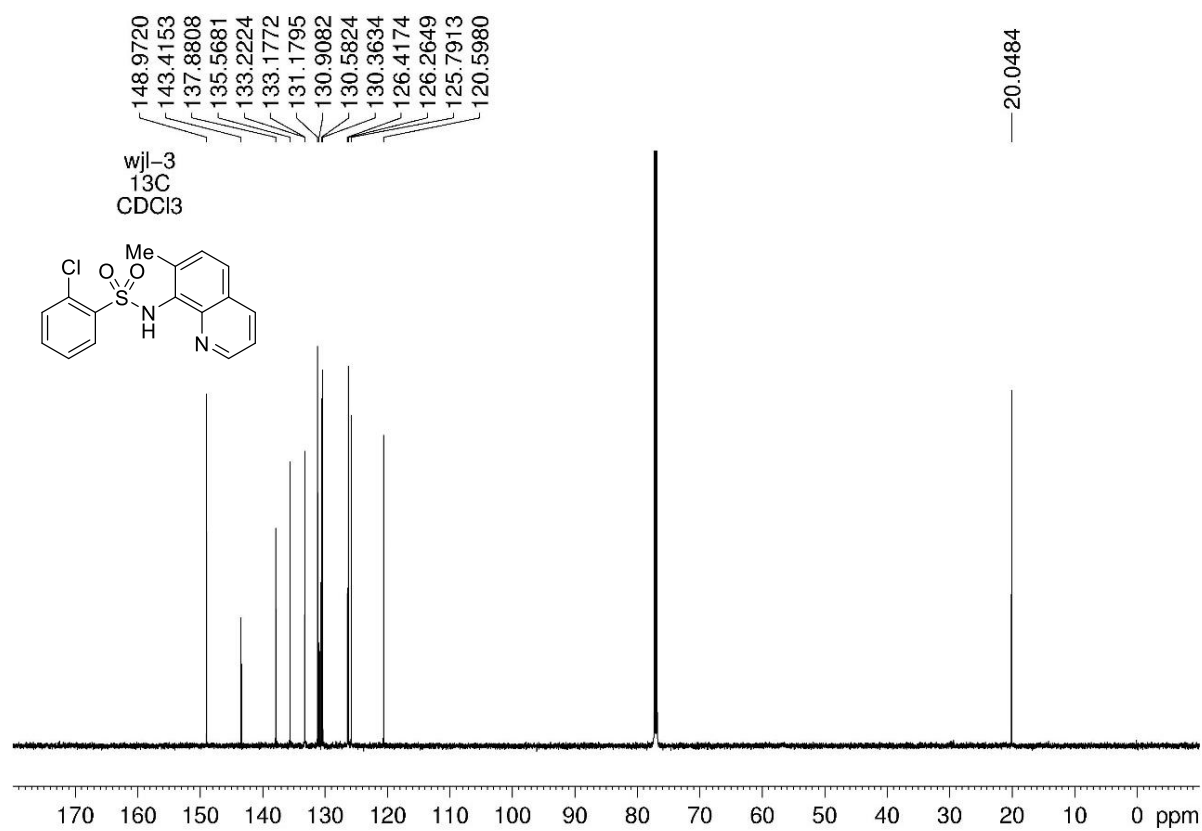

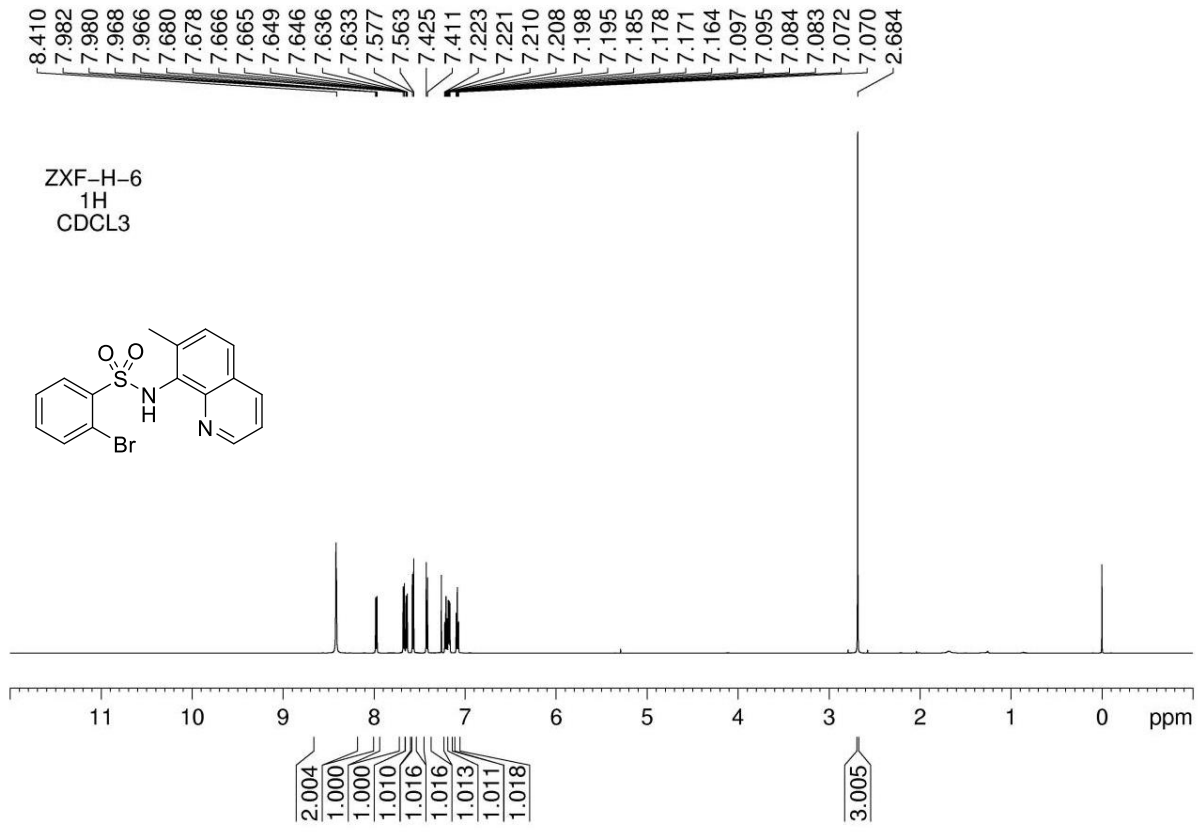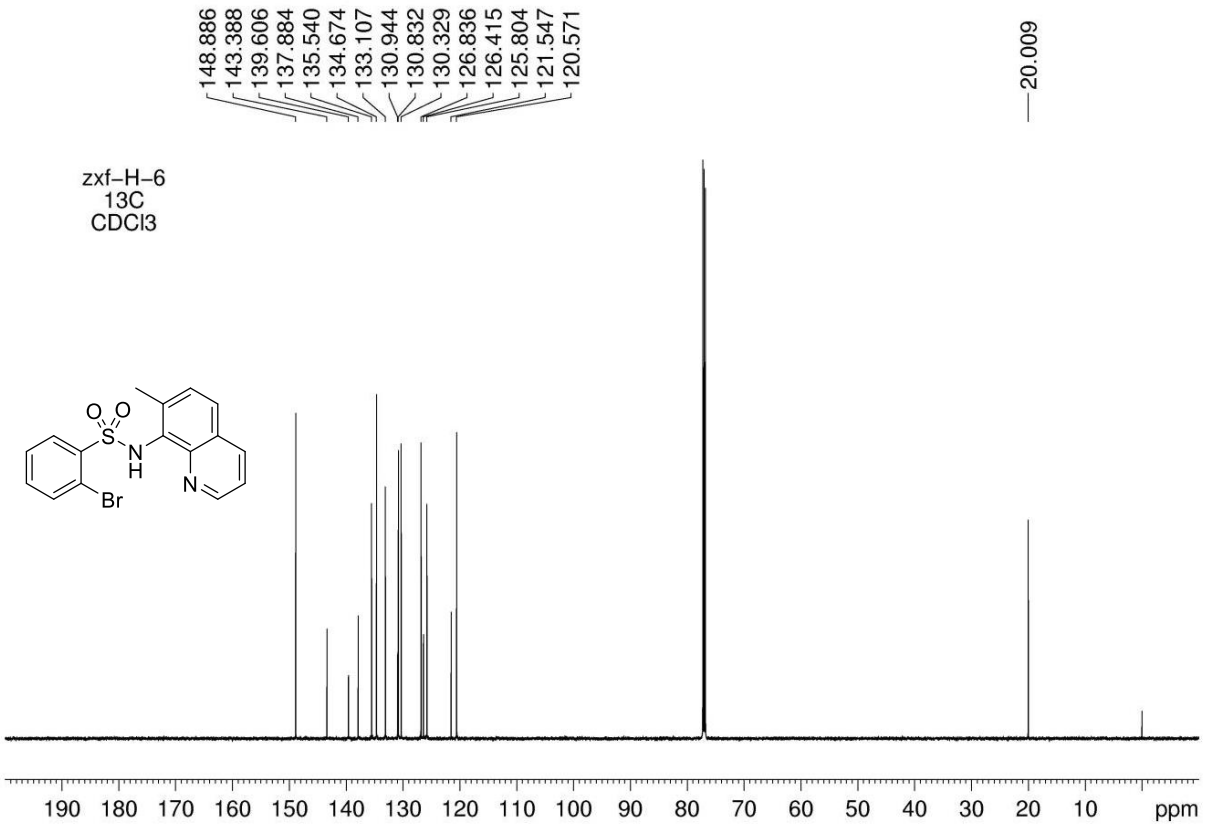

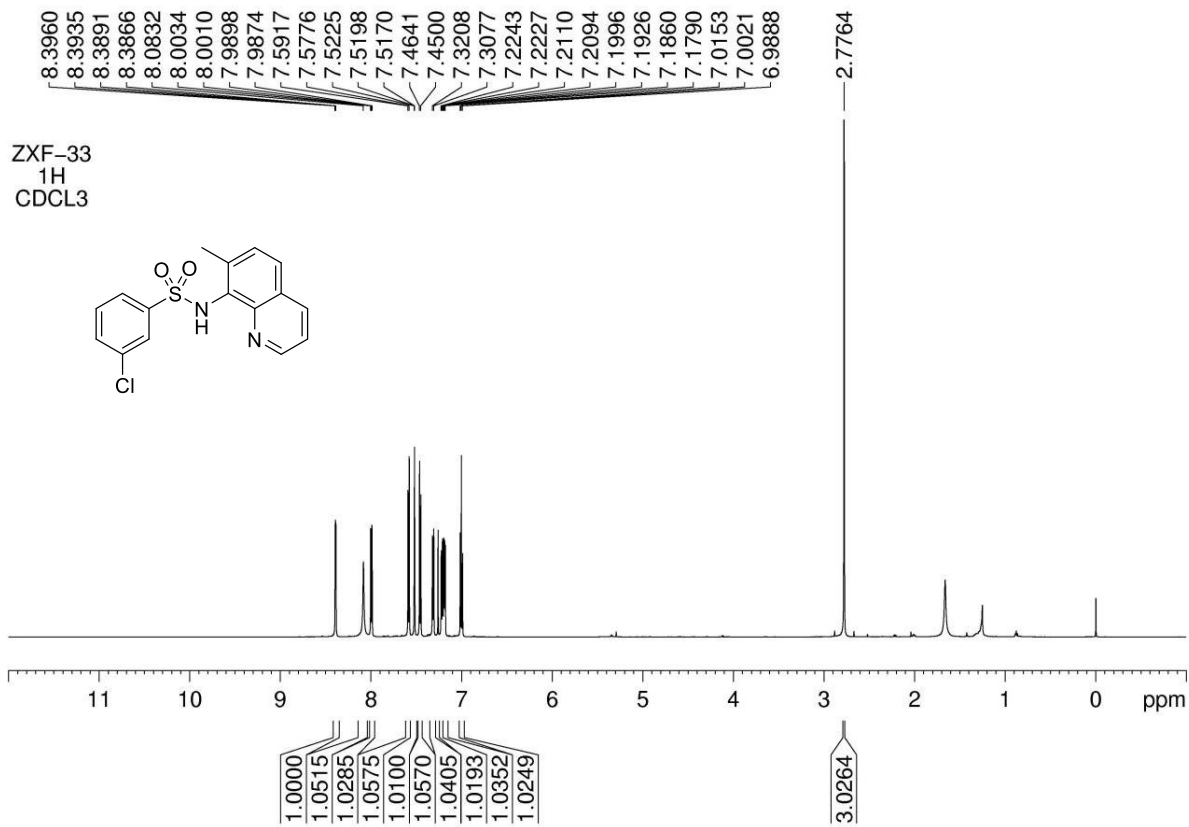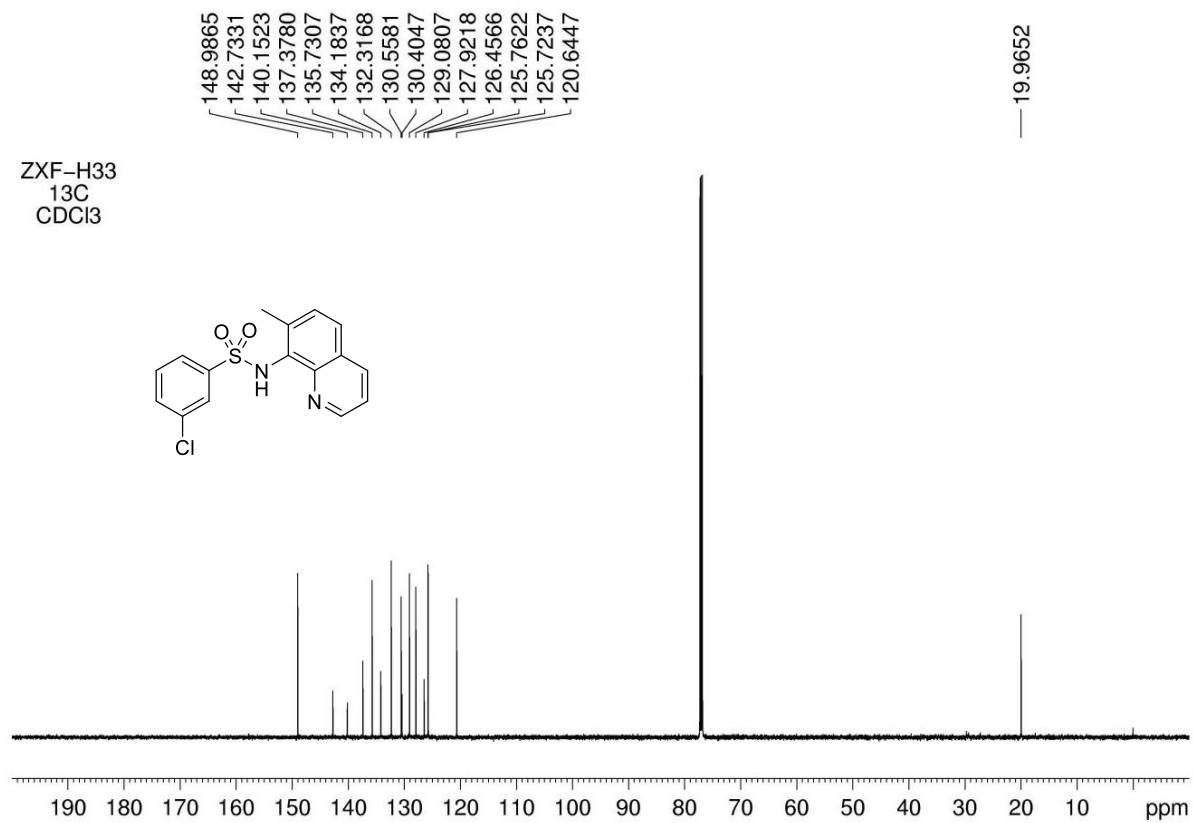

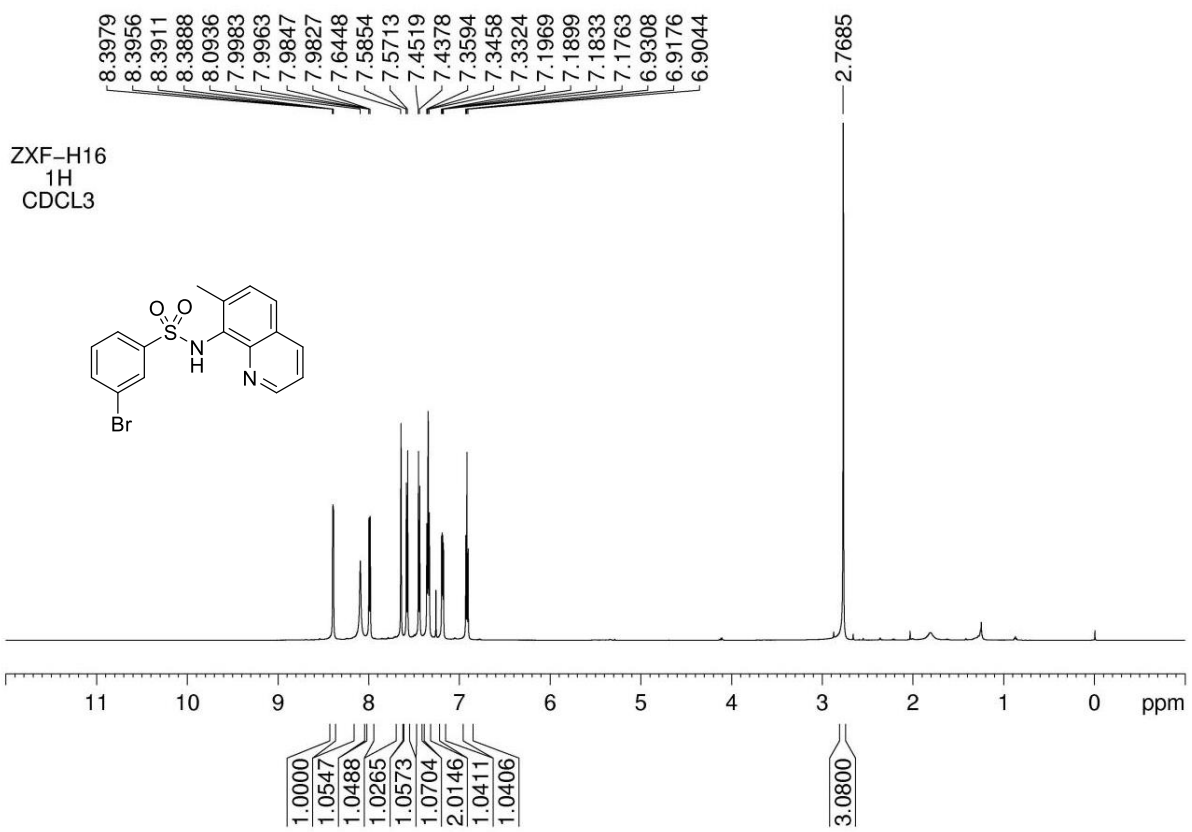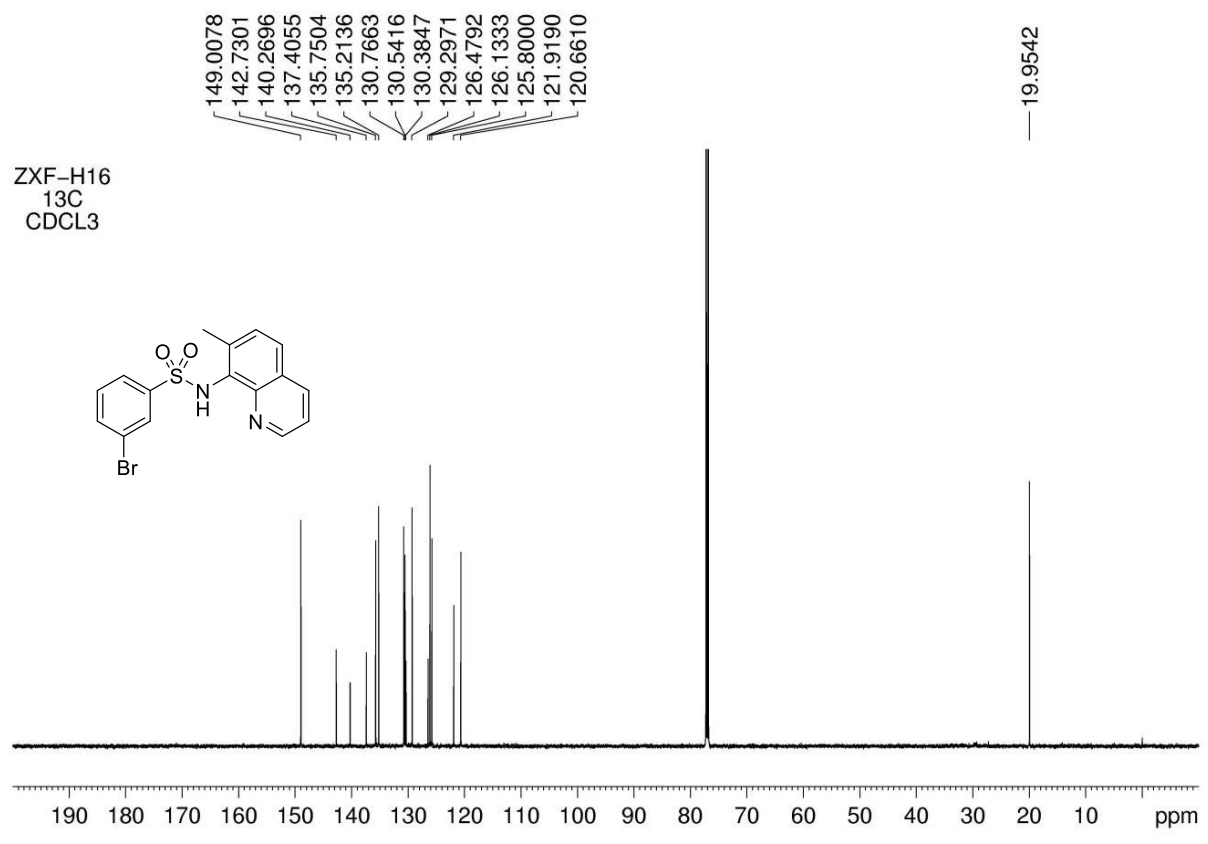

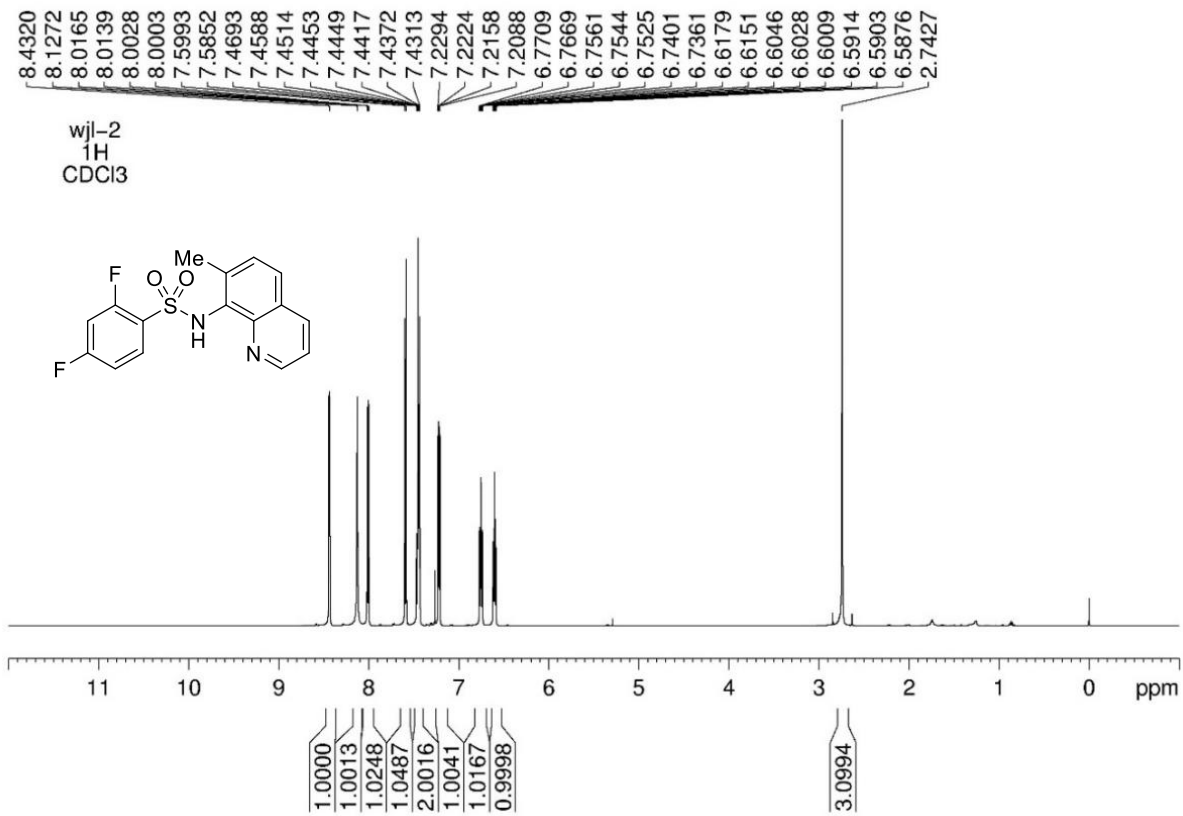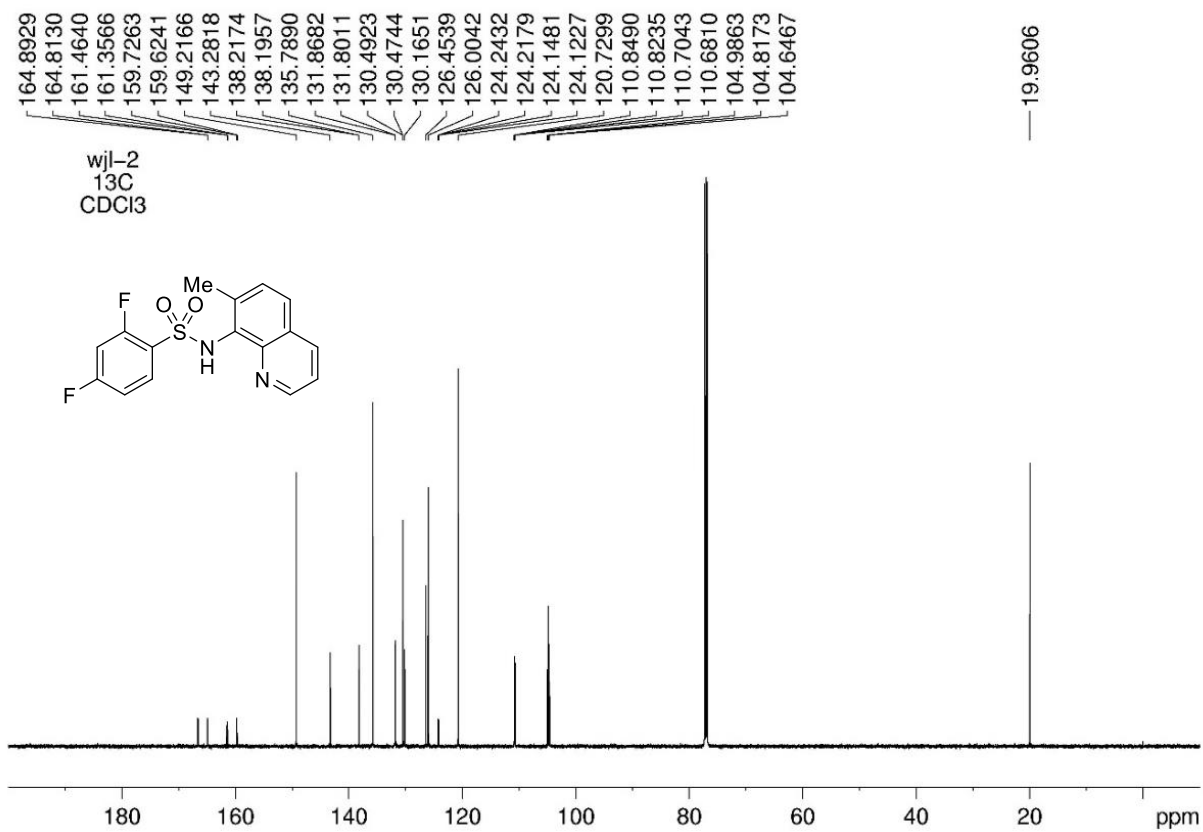

wjl-2  
19F  
CDCl3

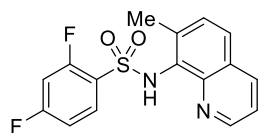

-101.2218  
-101.4347

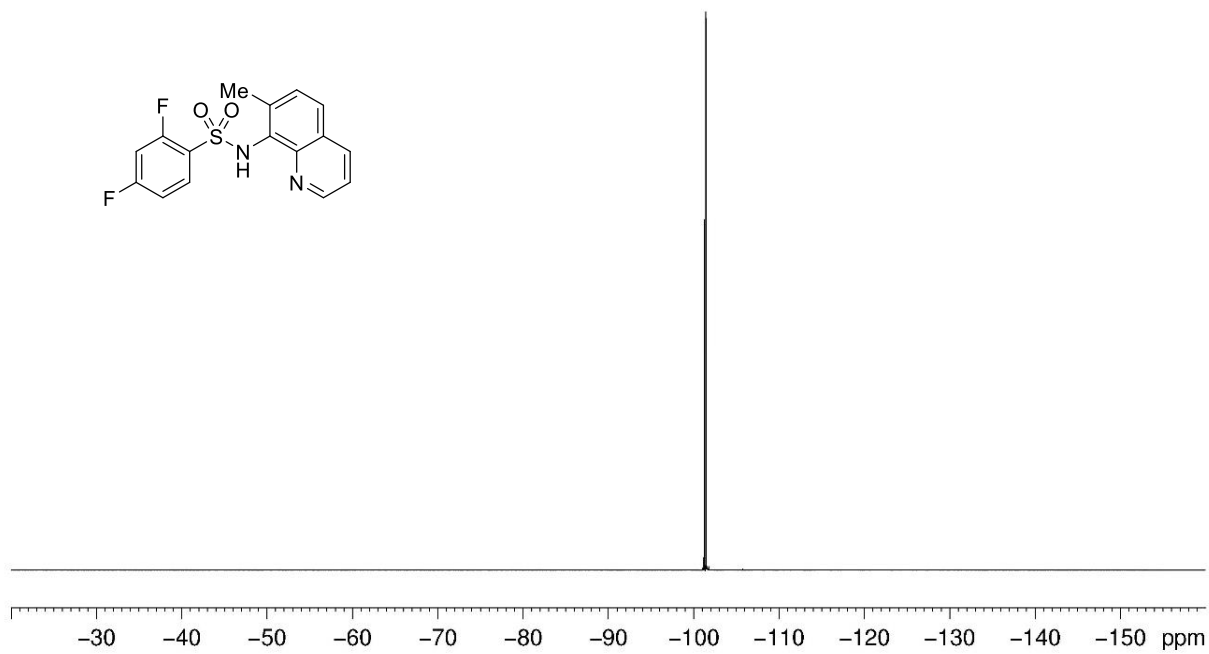

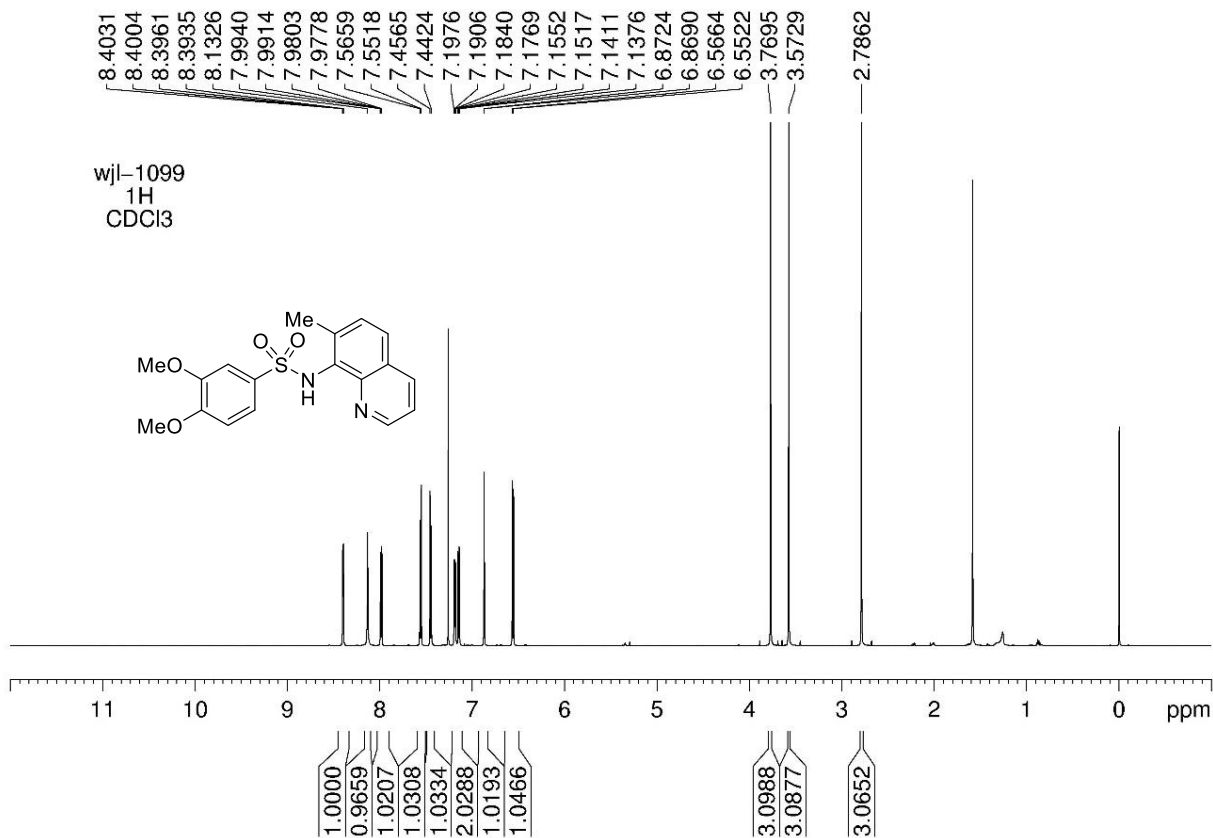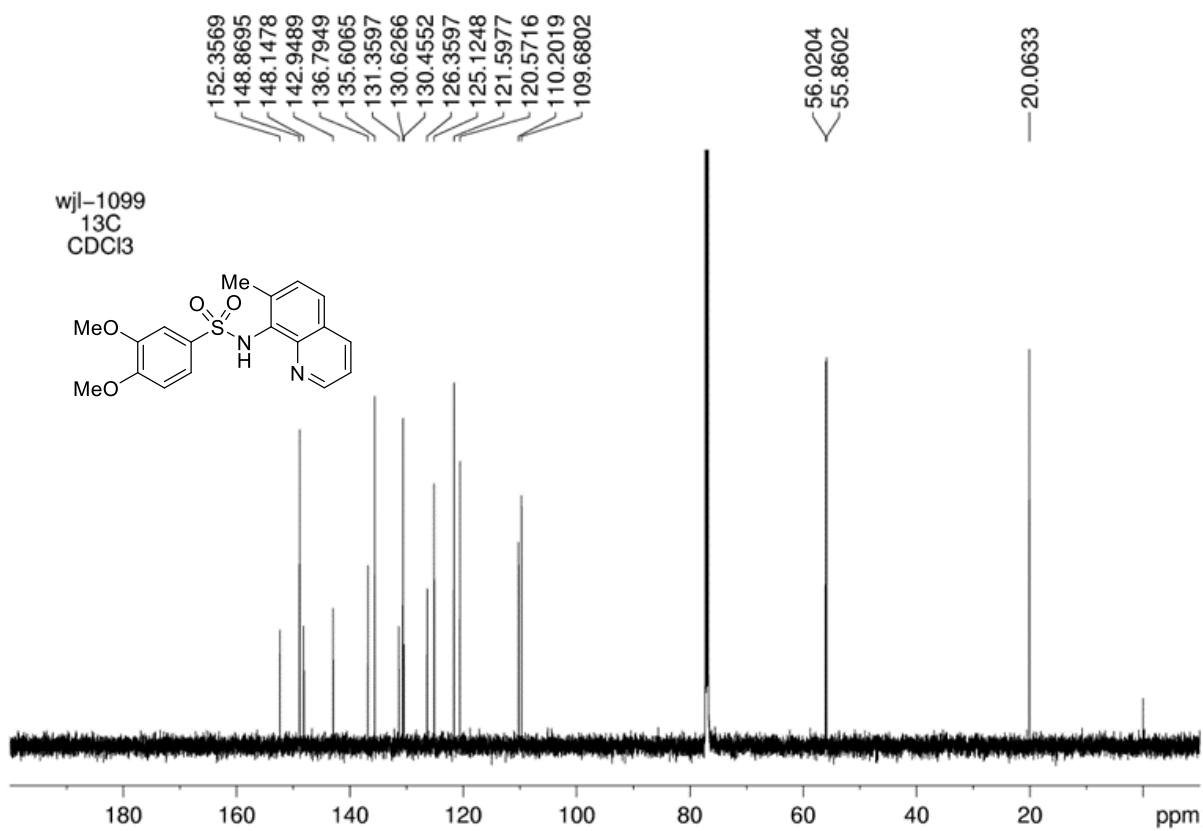



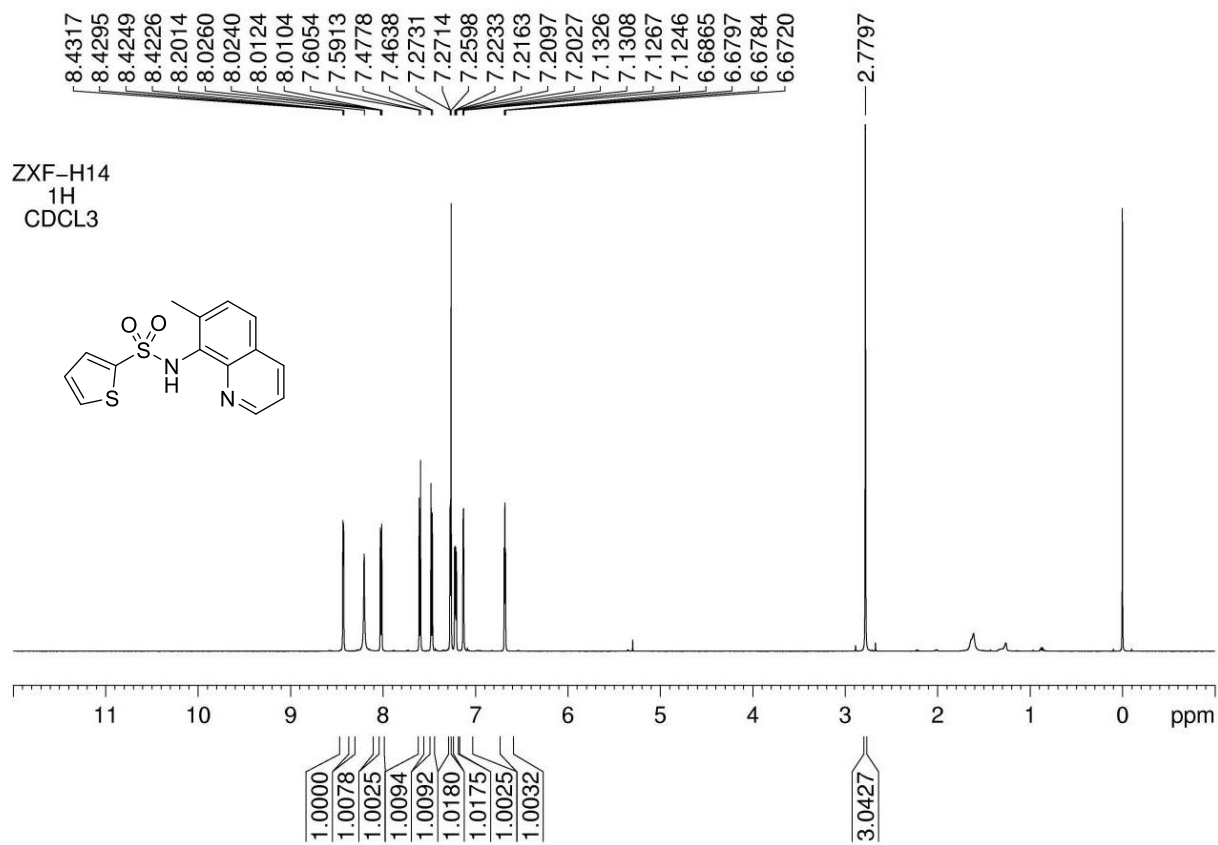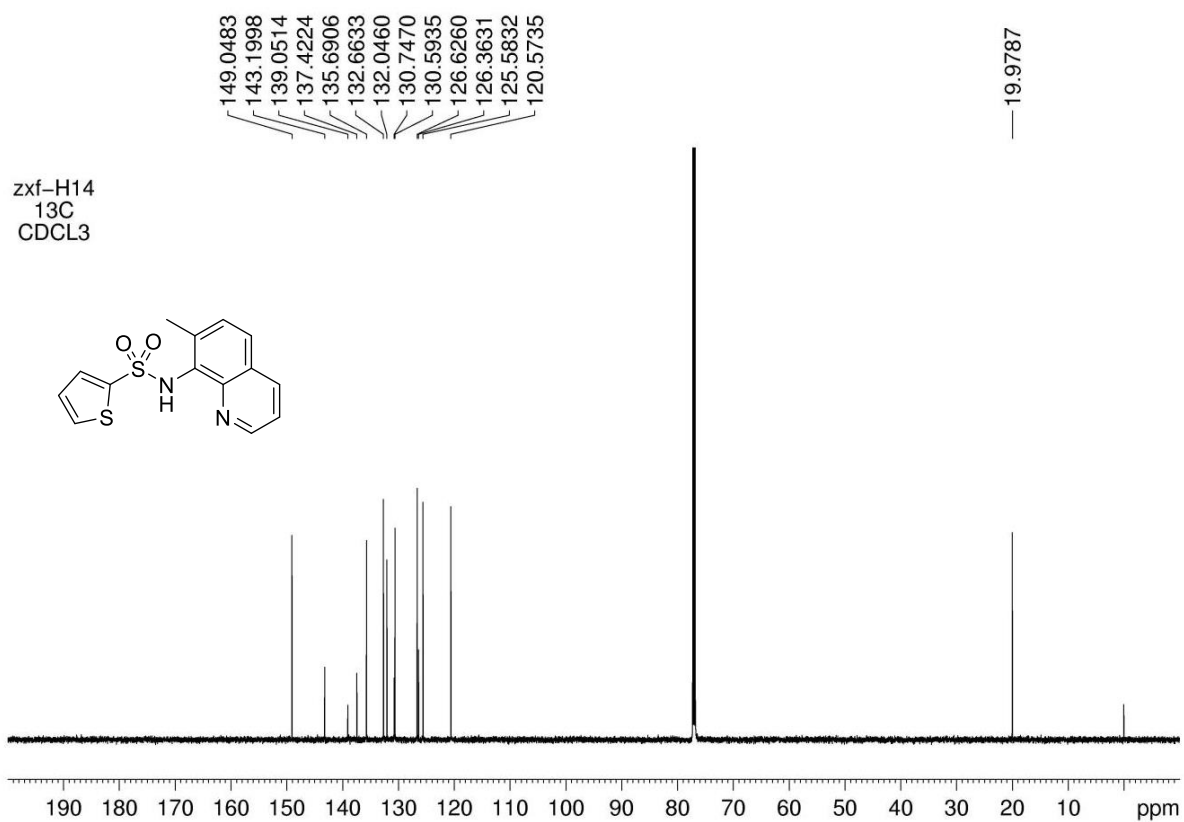

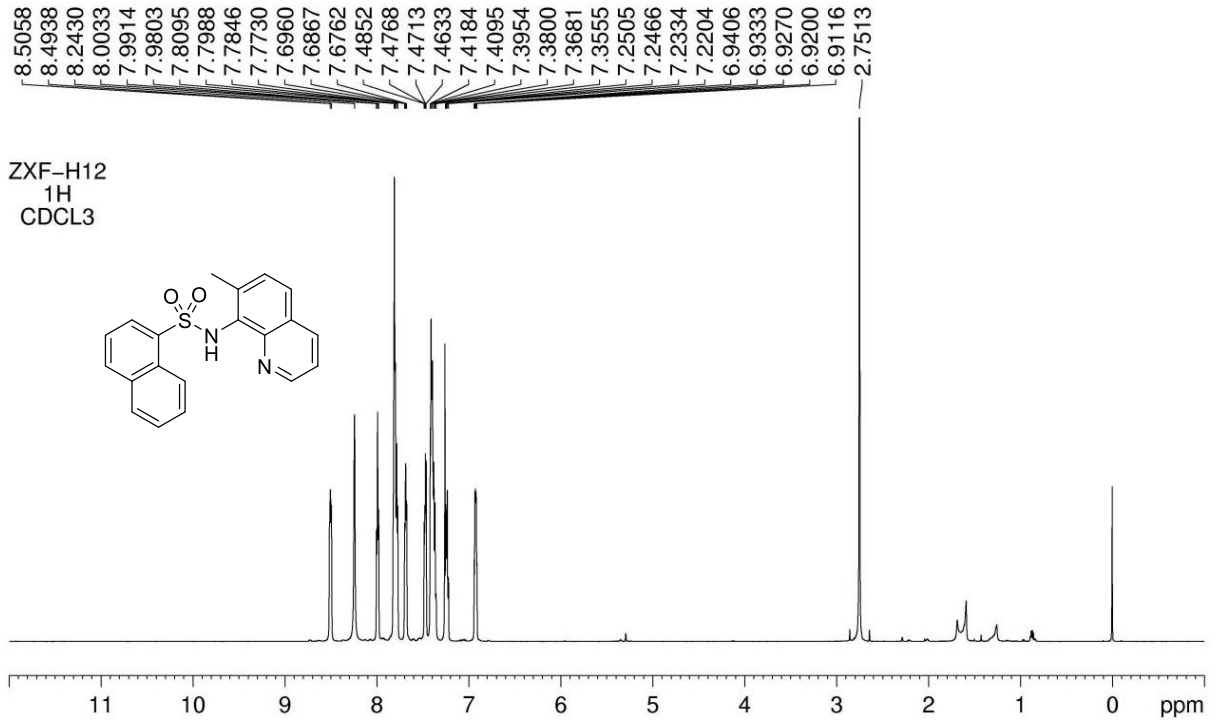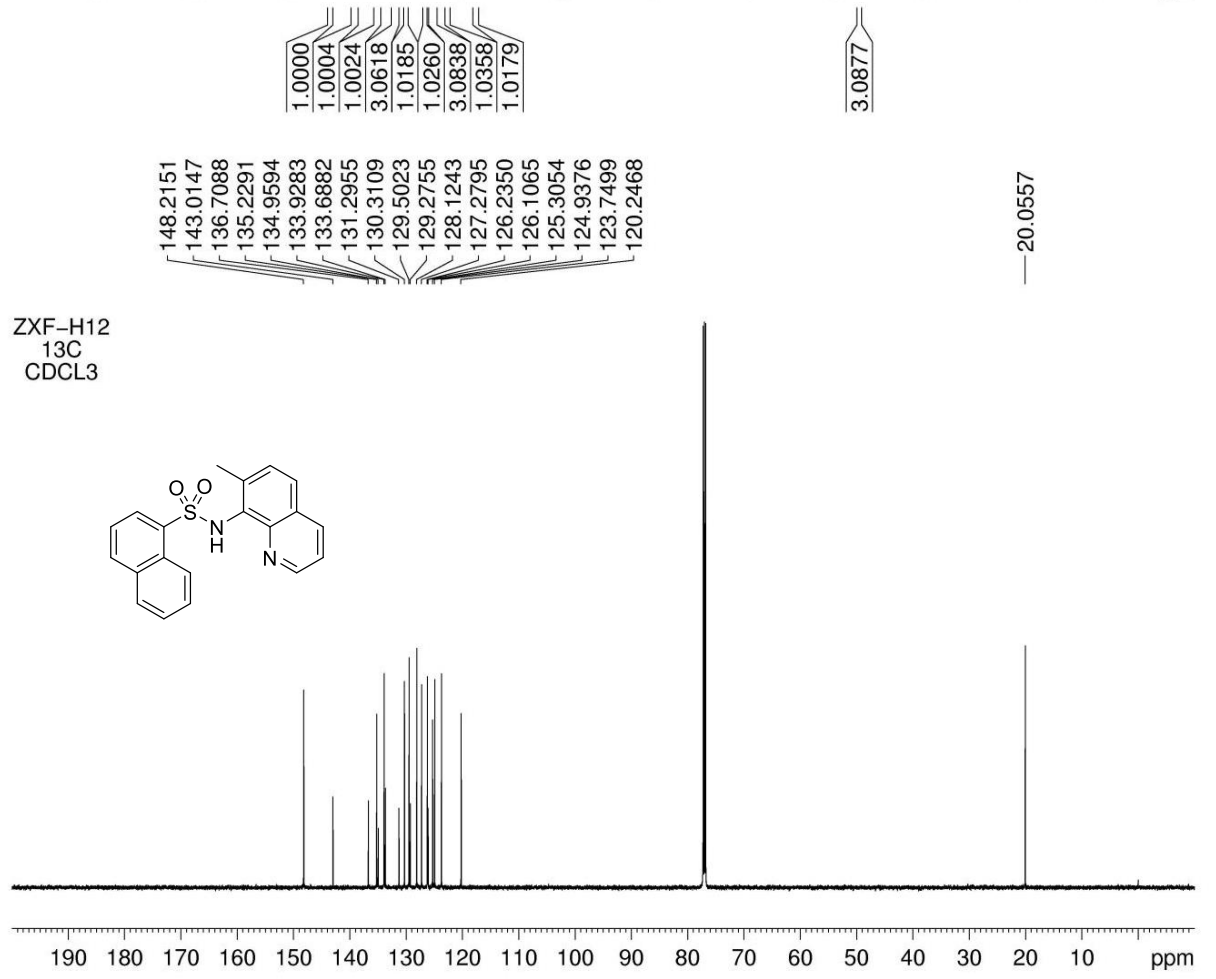

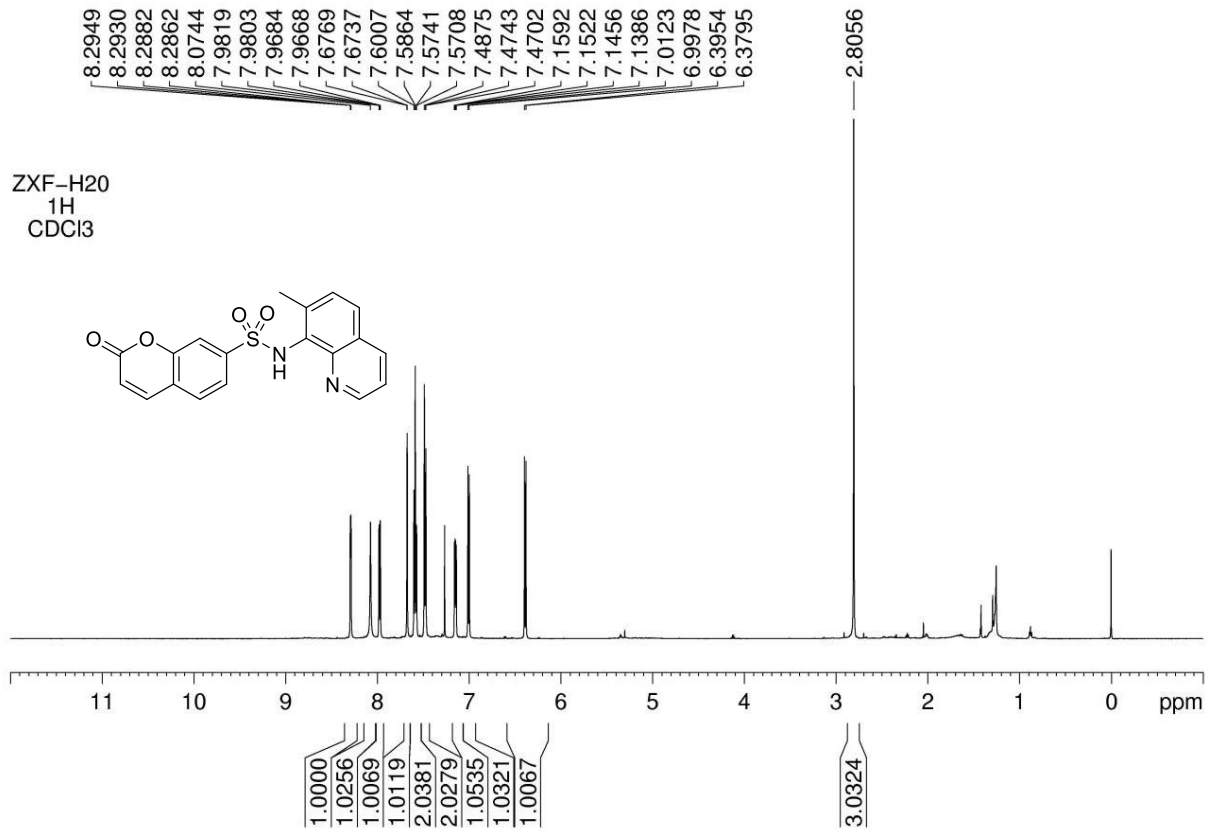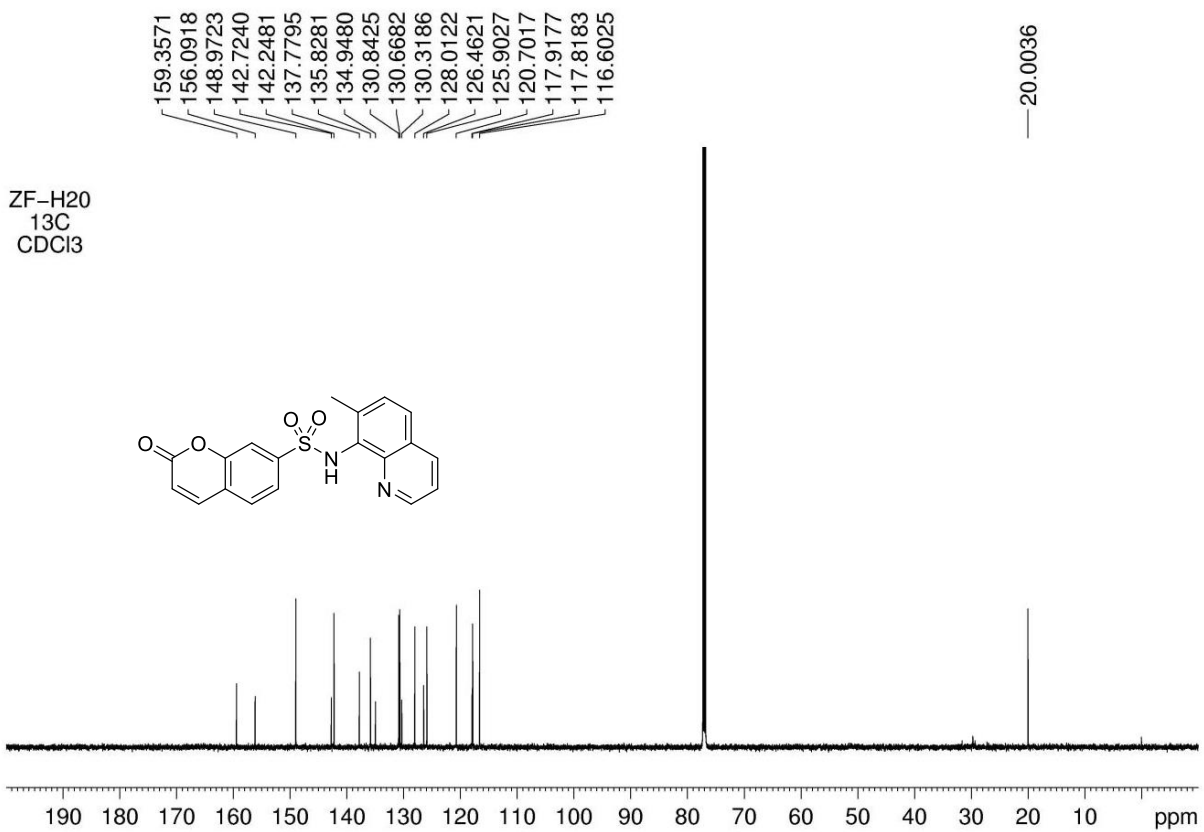

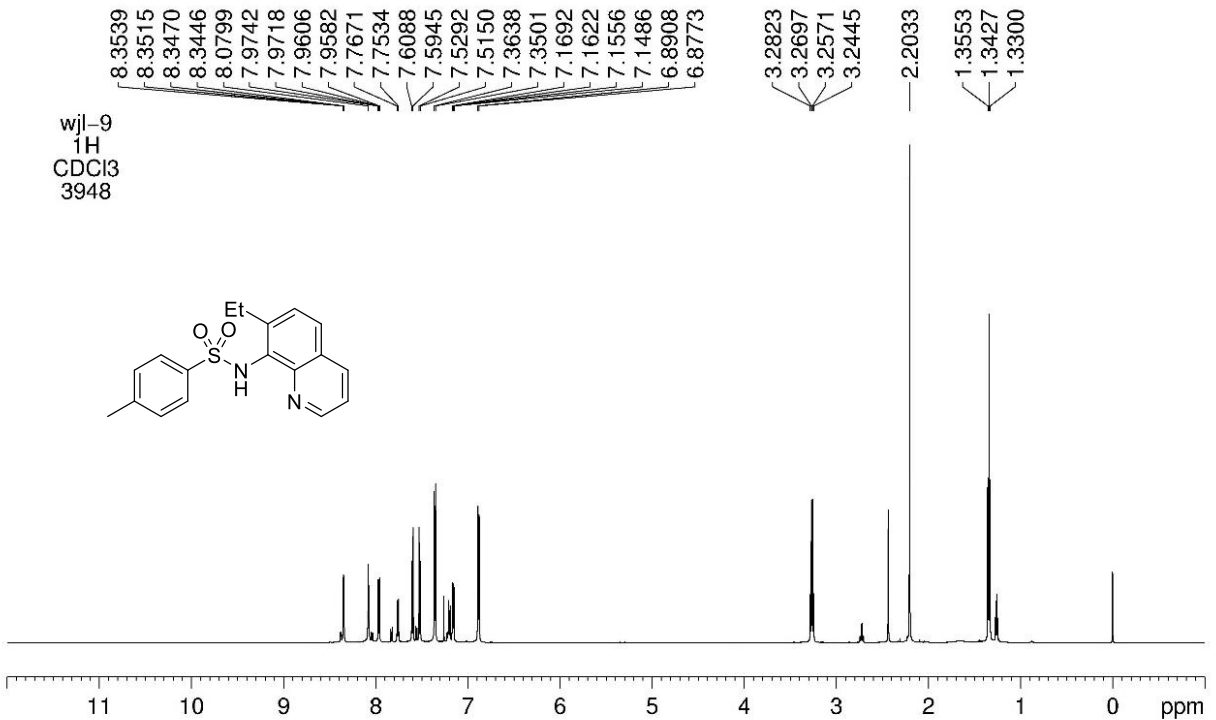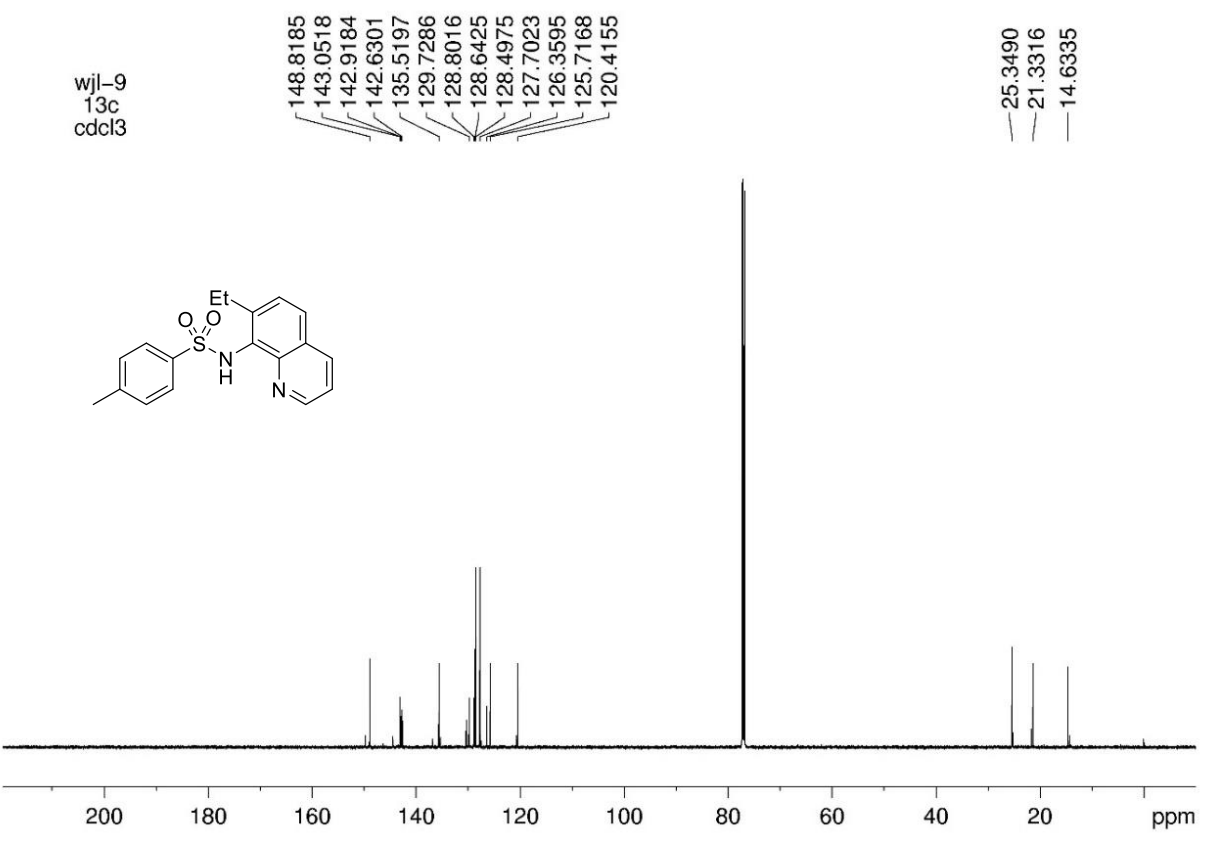

ZXF-H21  
1H  
CDCl3

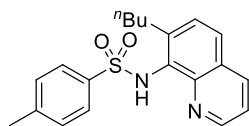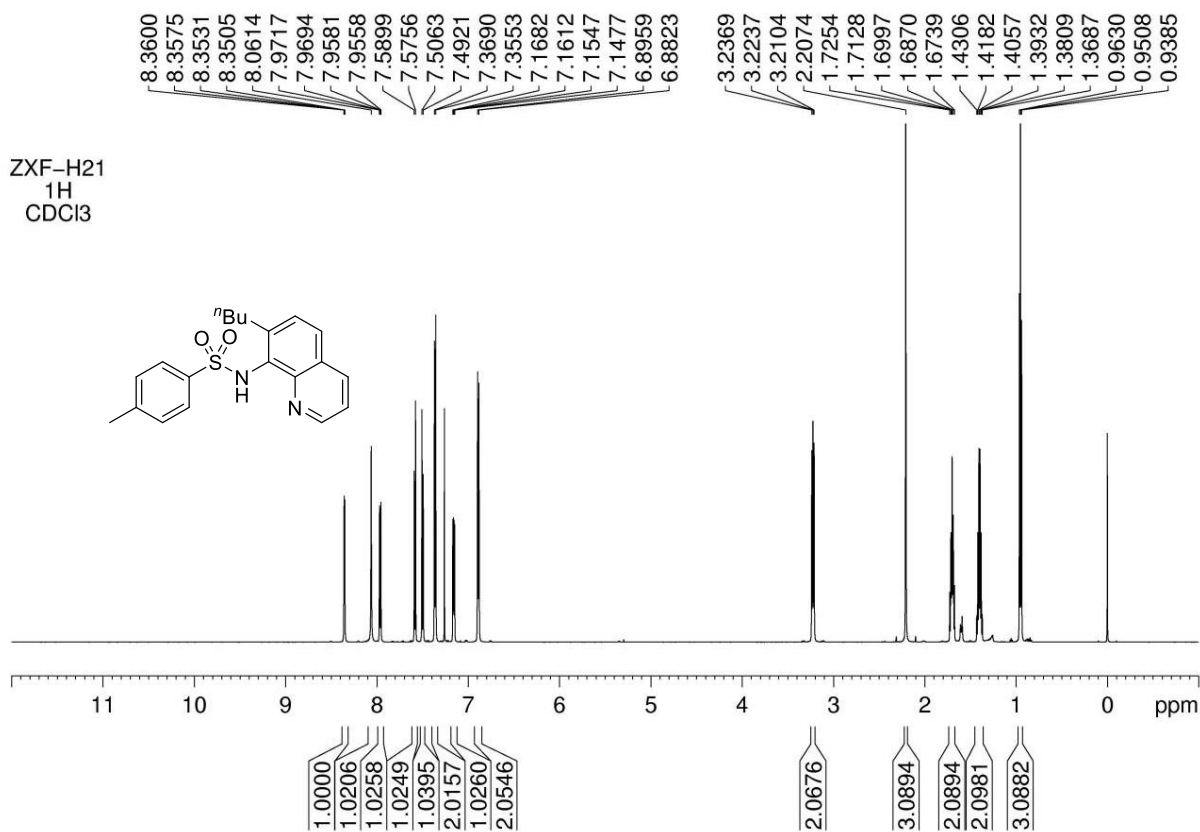

ZXF-H21  
13C  
CDCl3

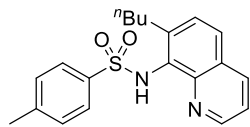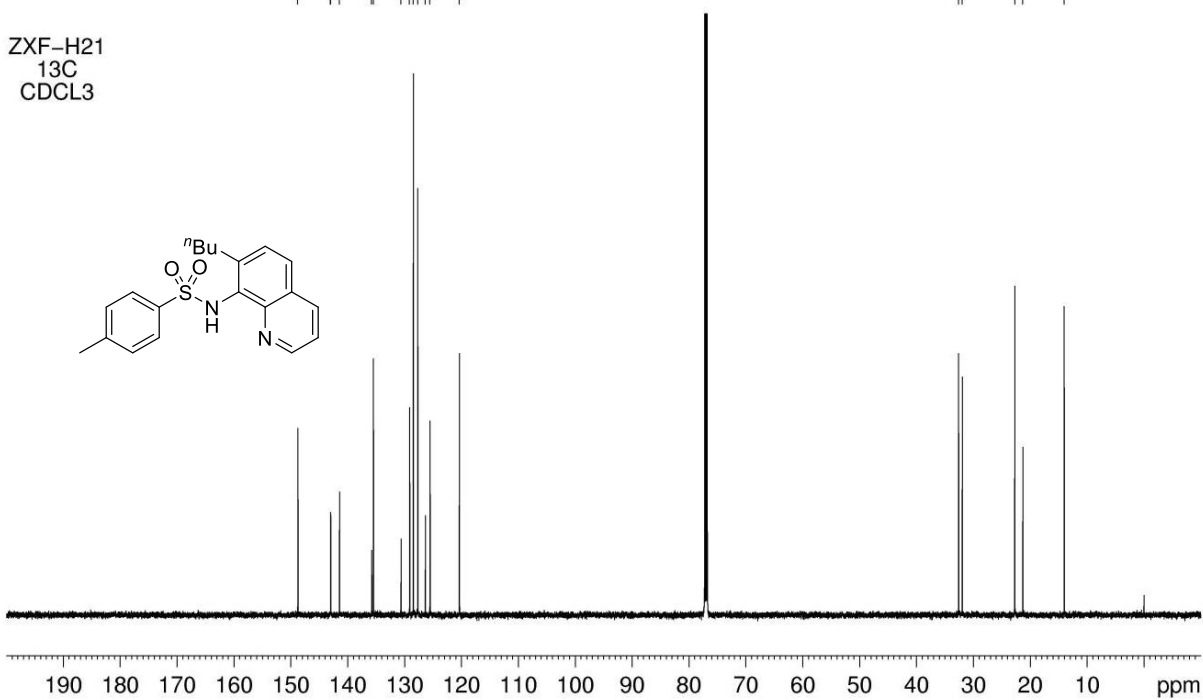

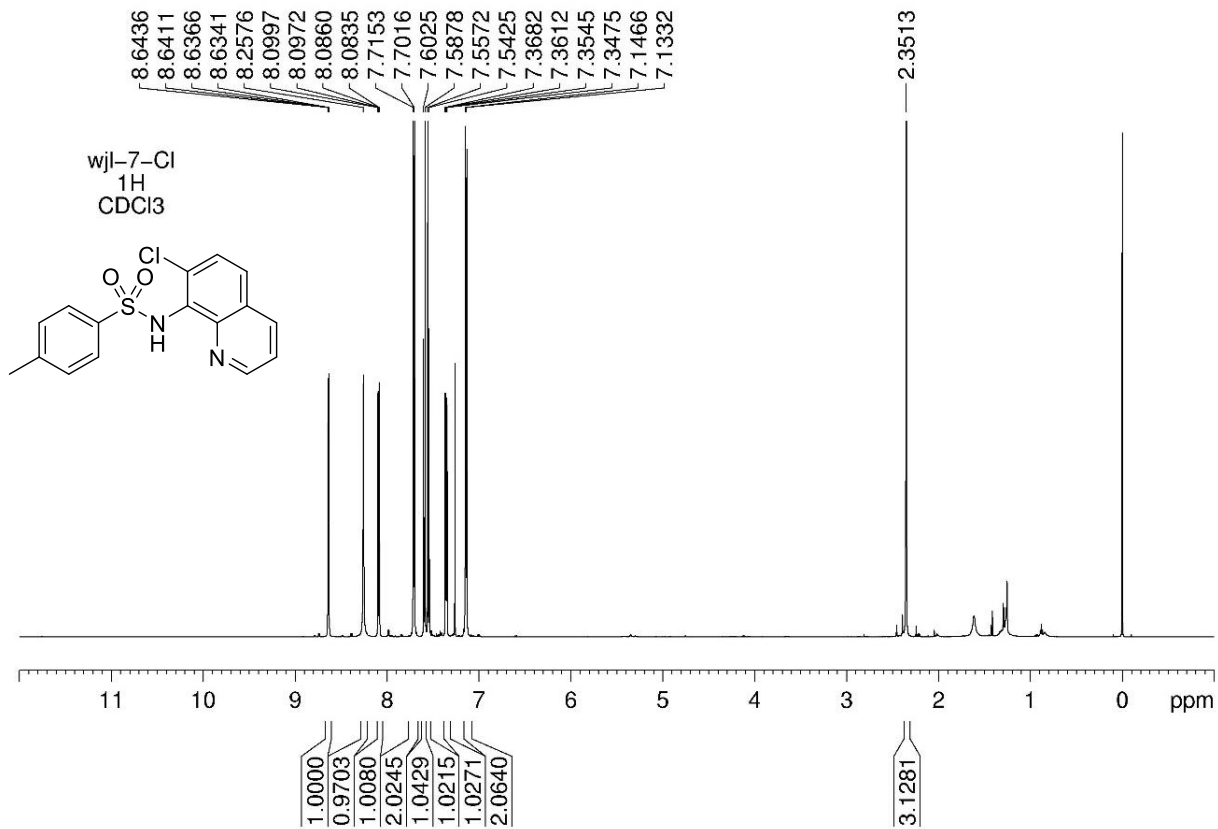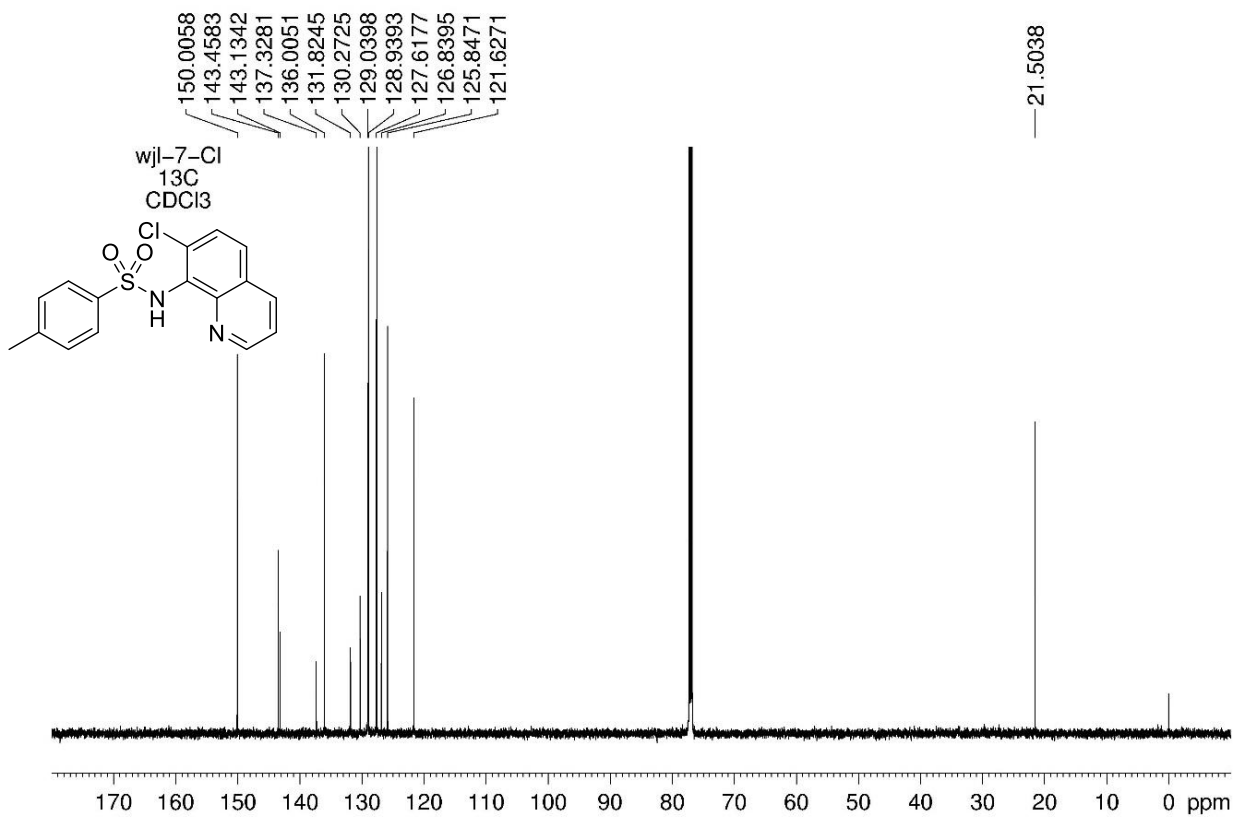

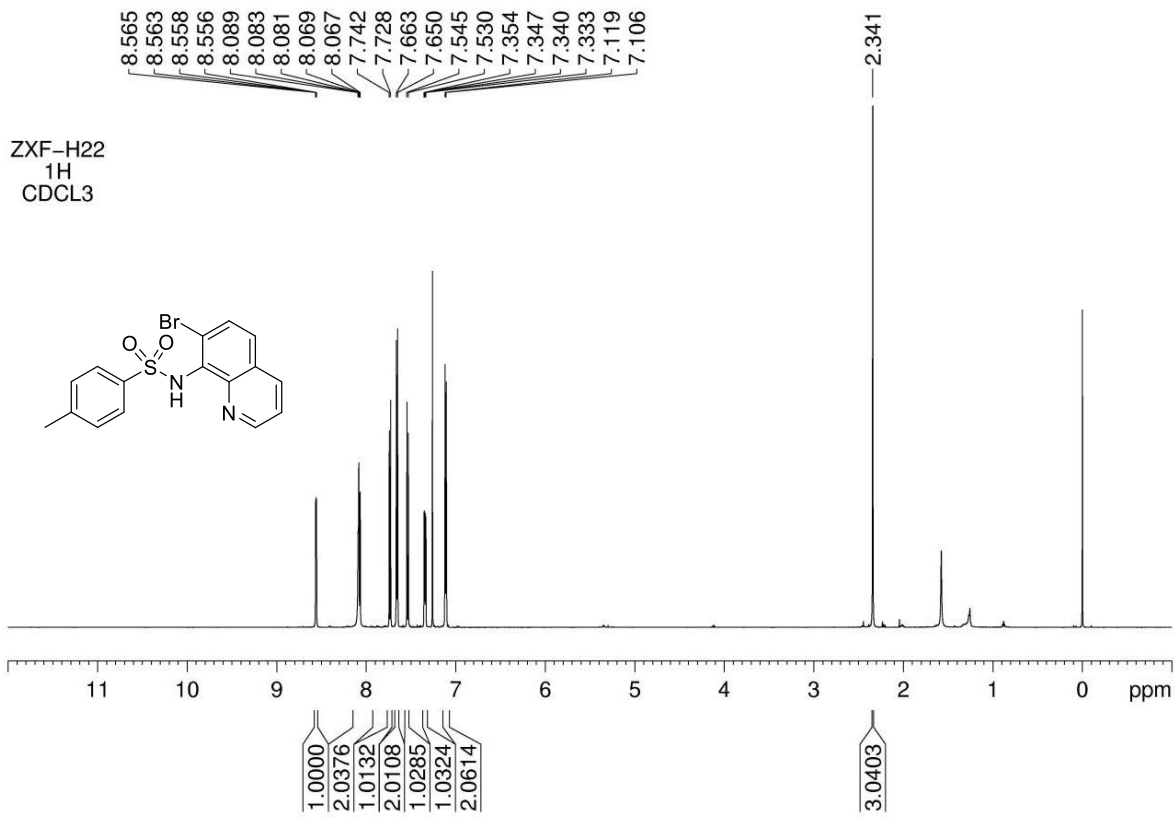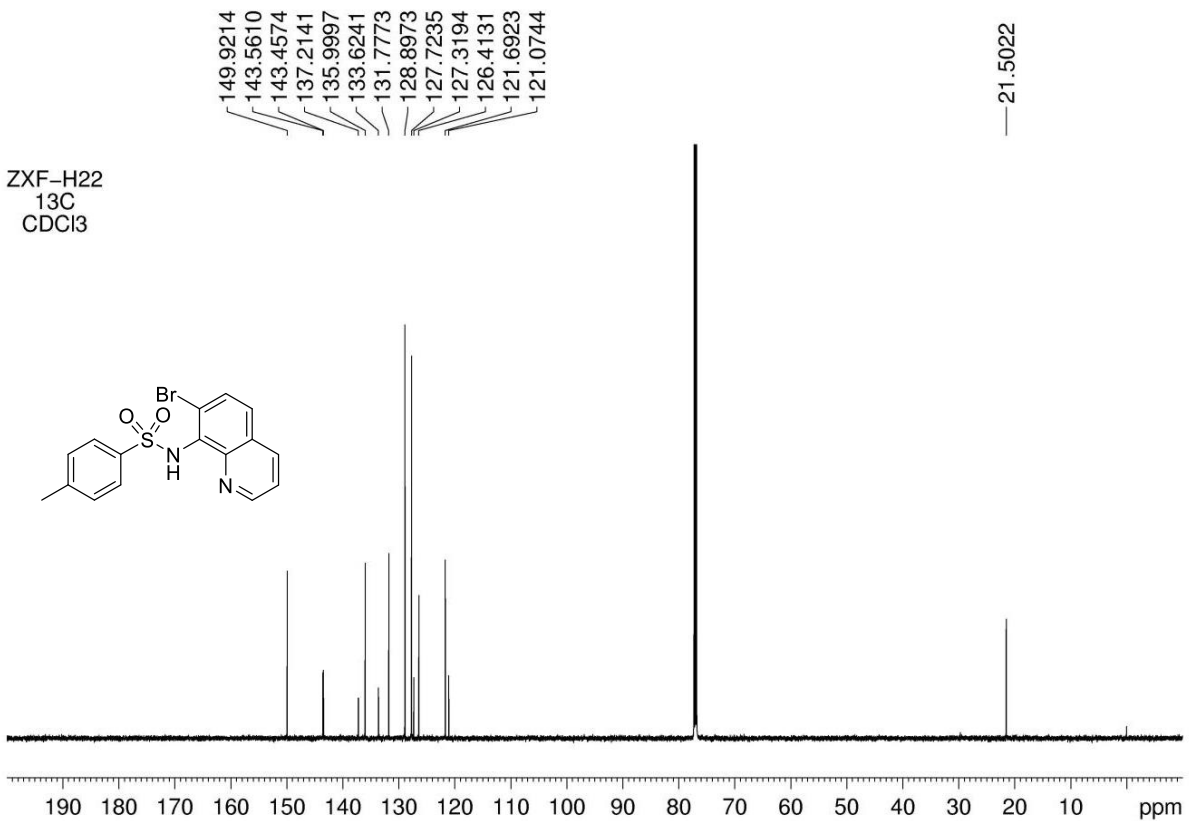

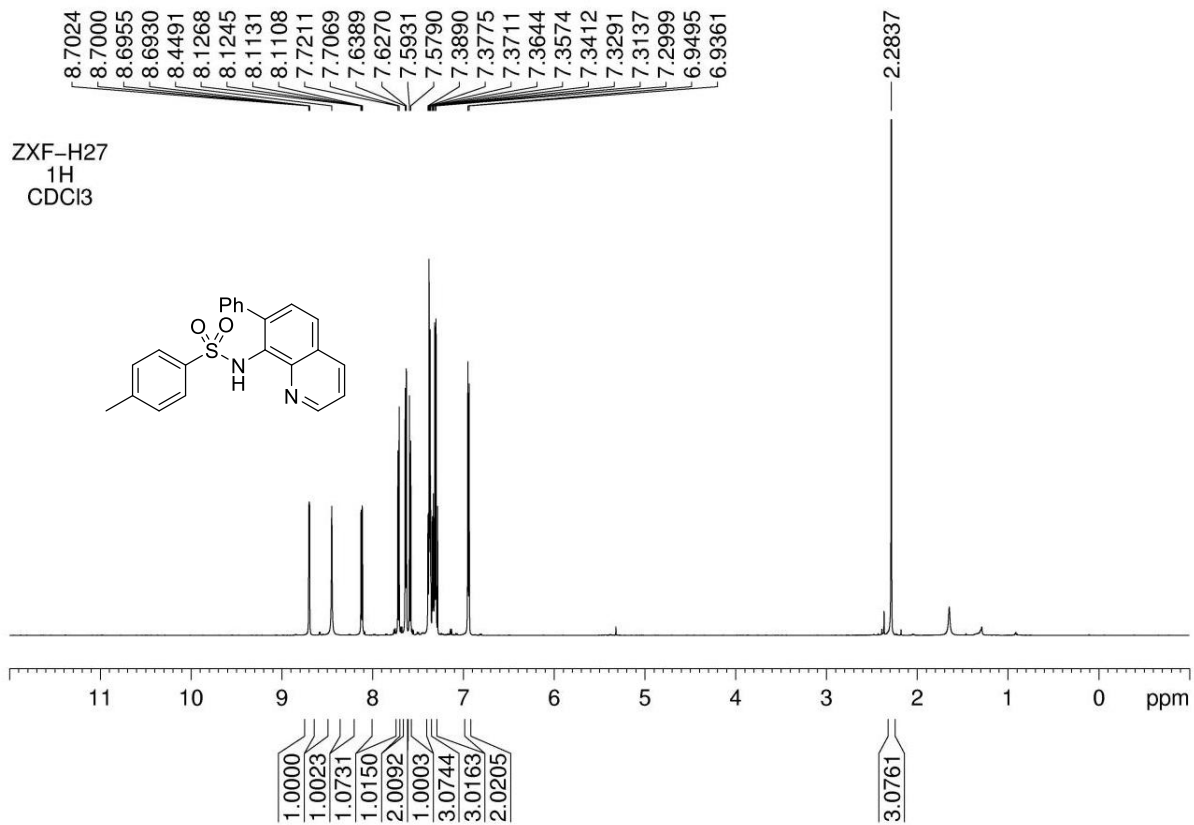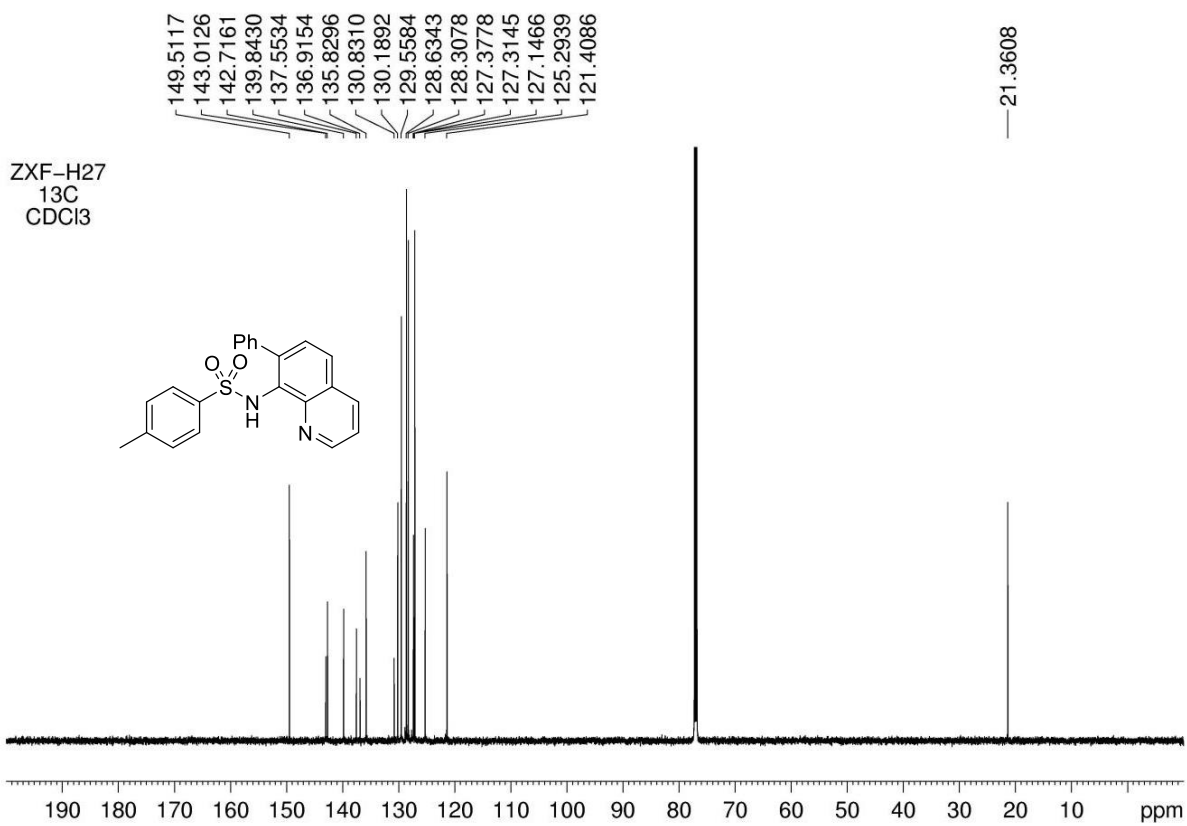



ZXF-H37  
1H  
CDCl3

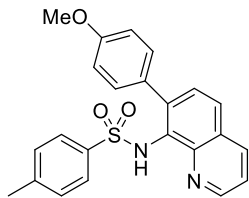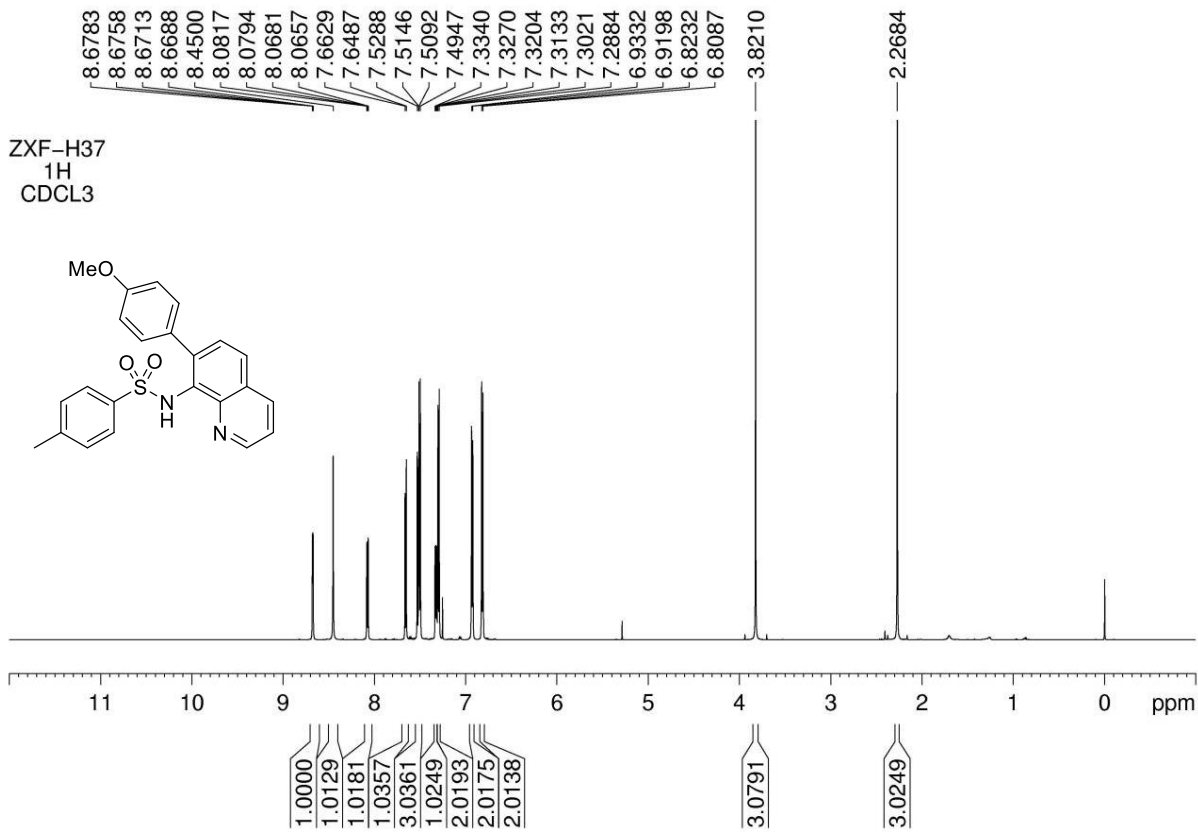

ZXF-H37  
13C  
CDCl3

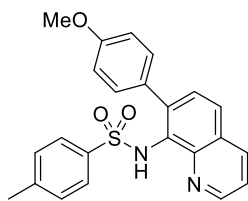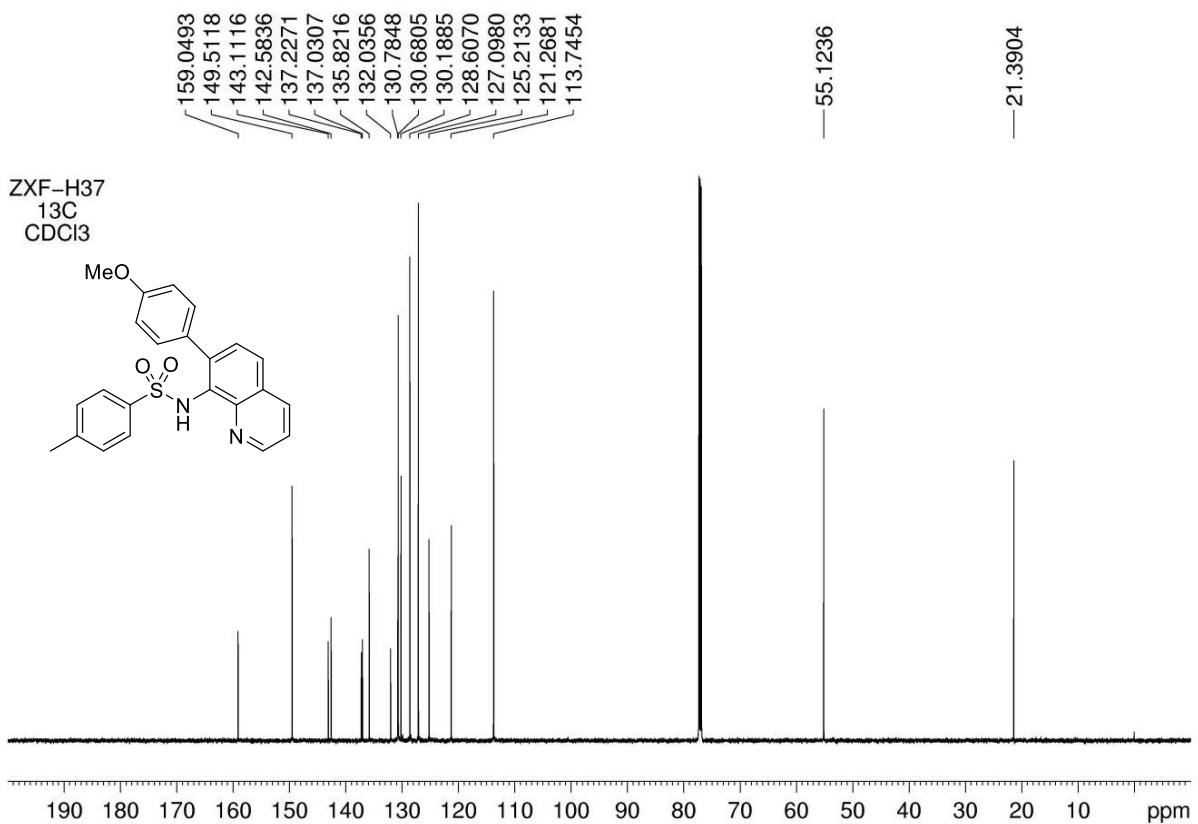

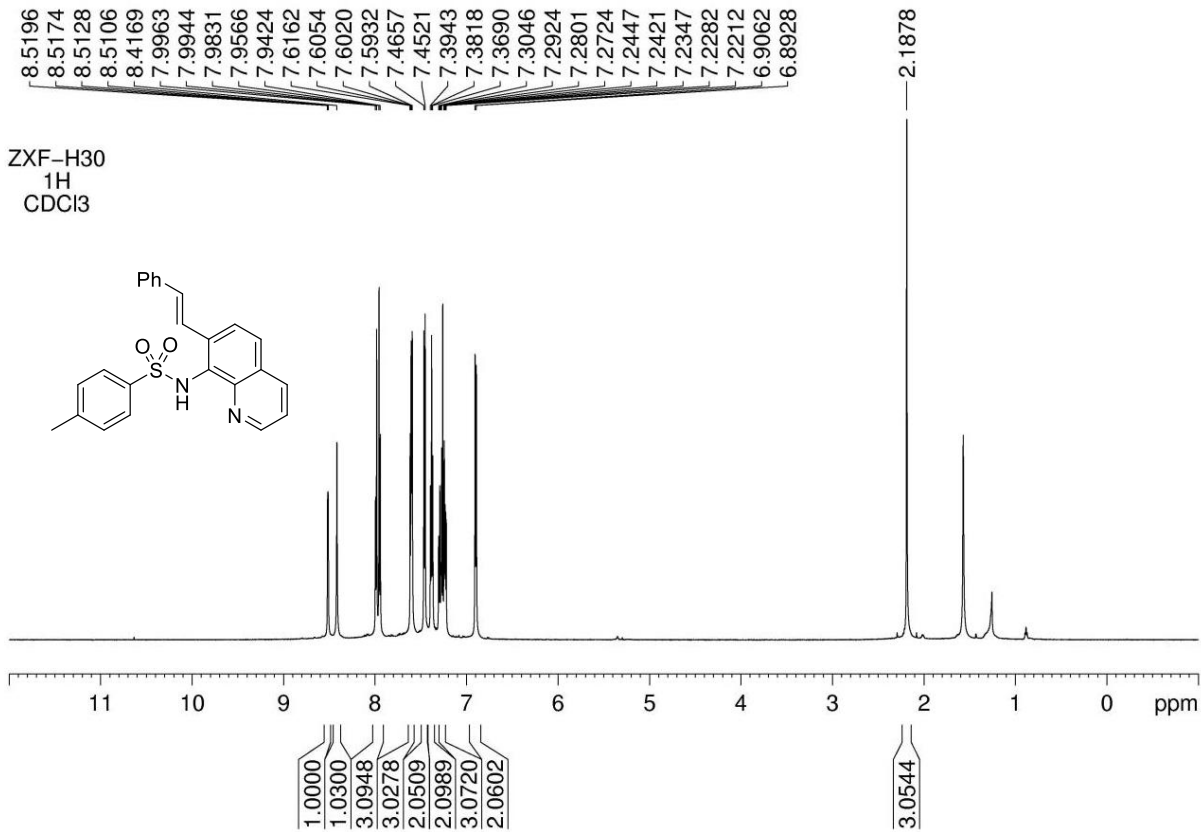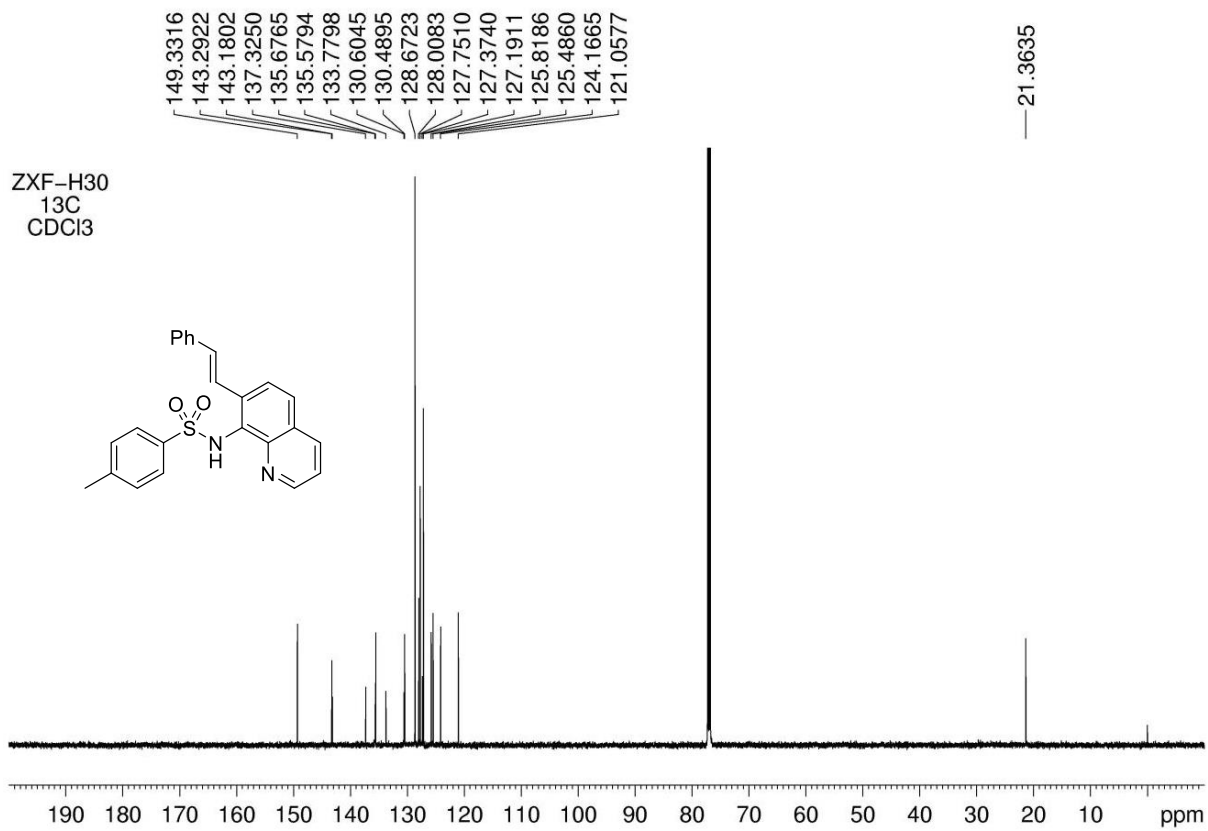

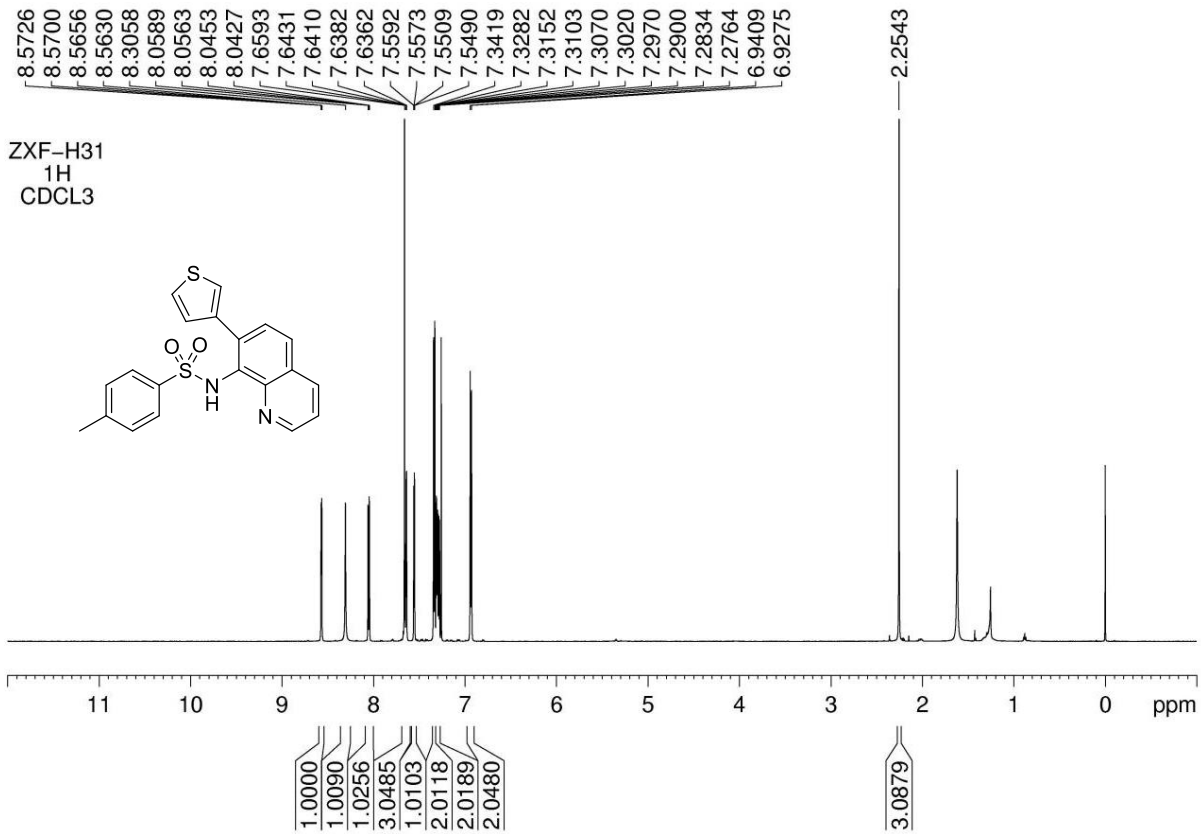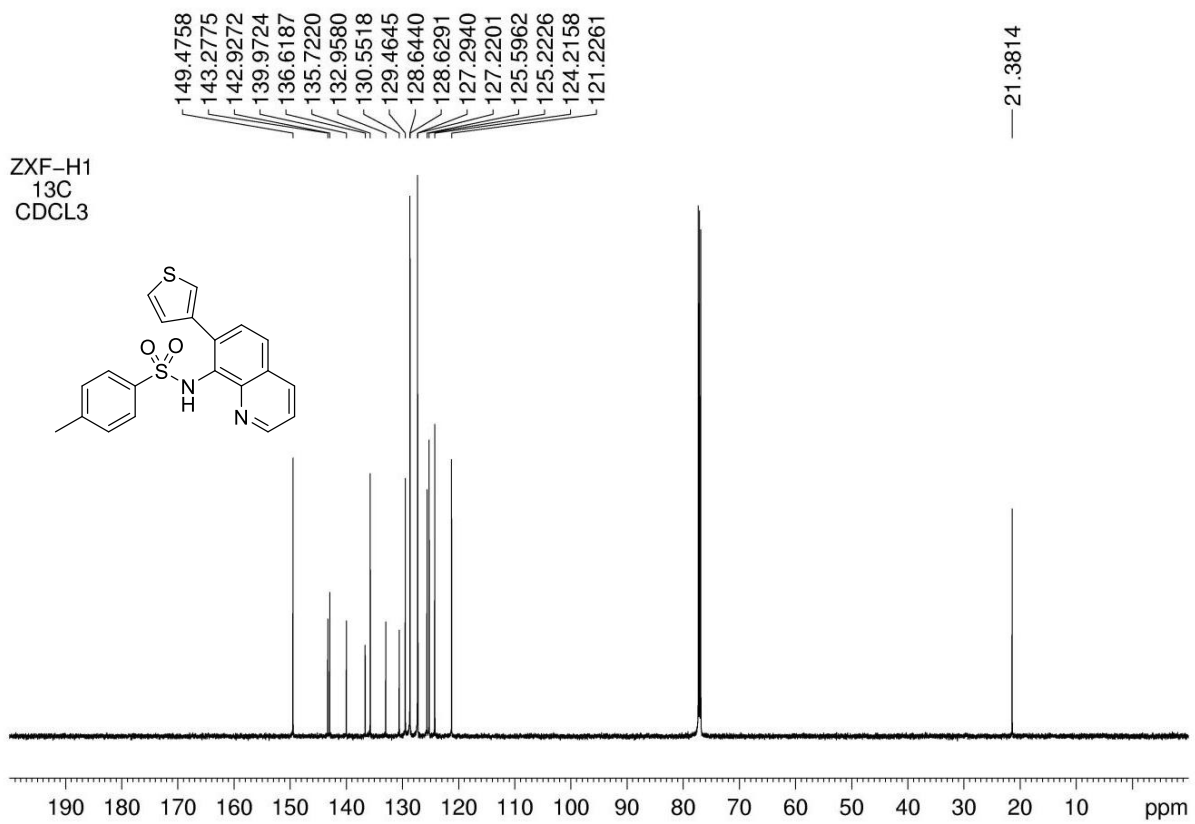

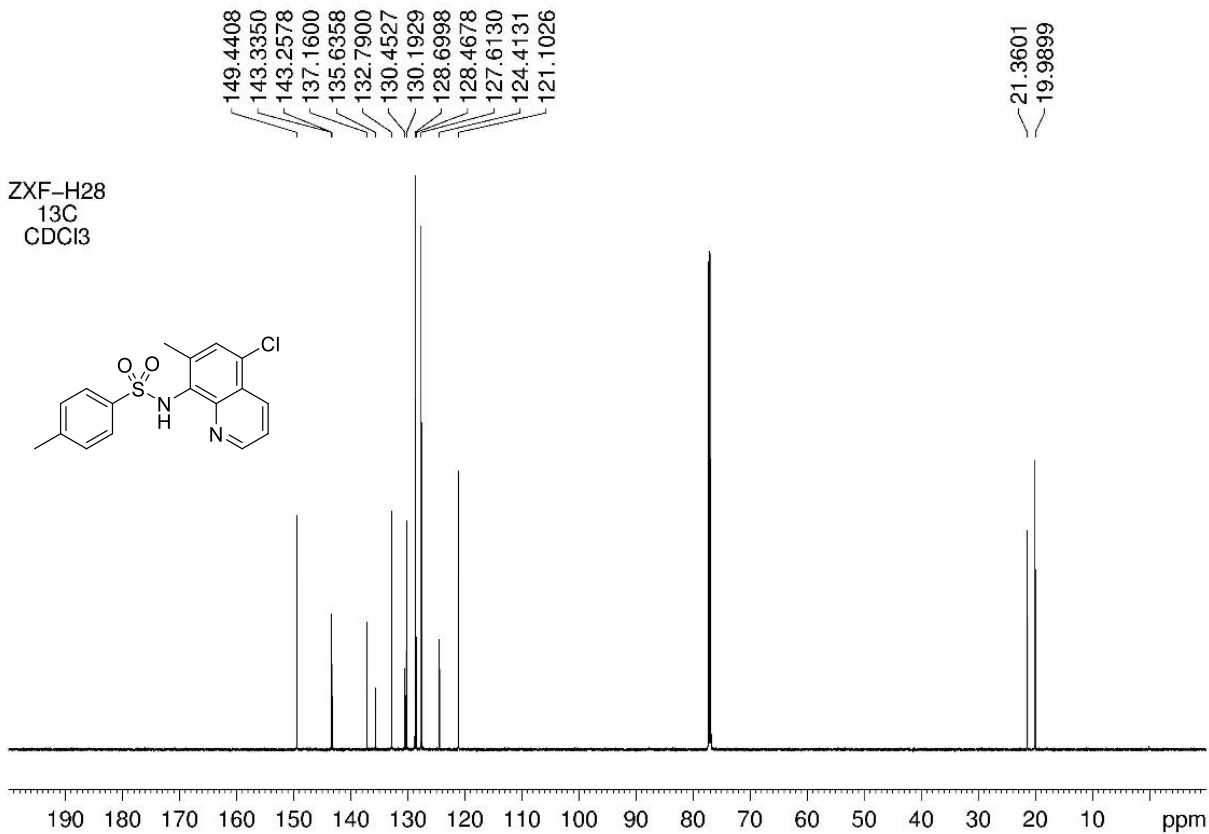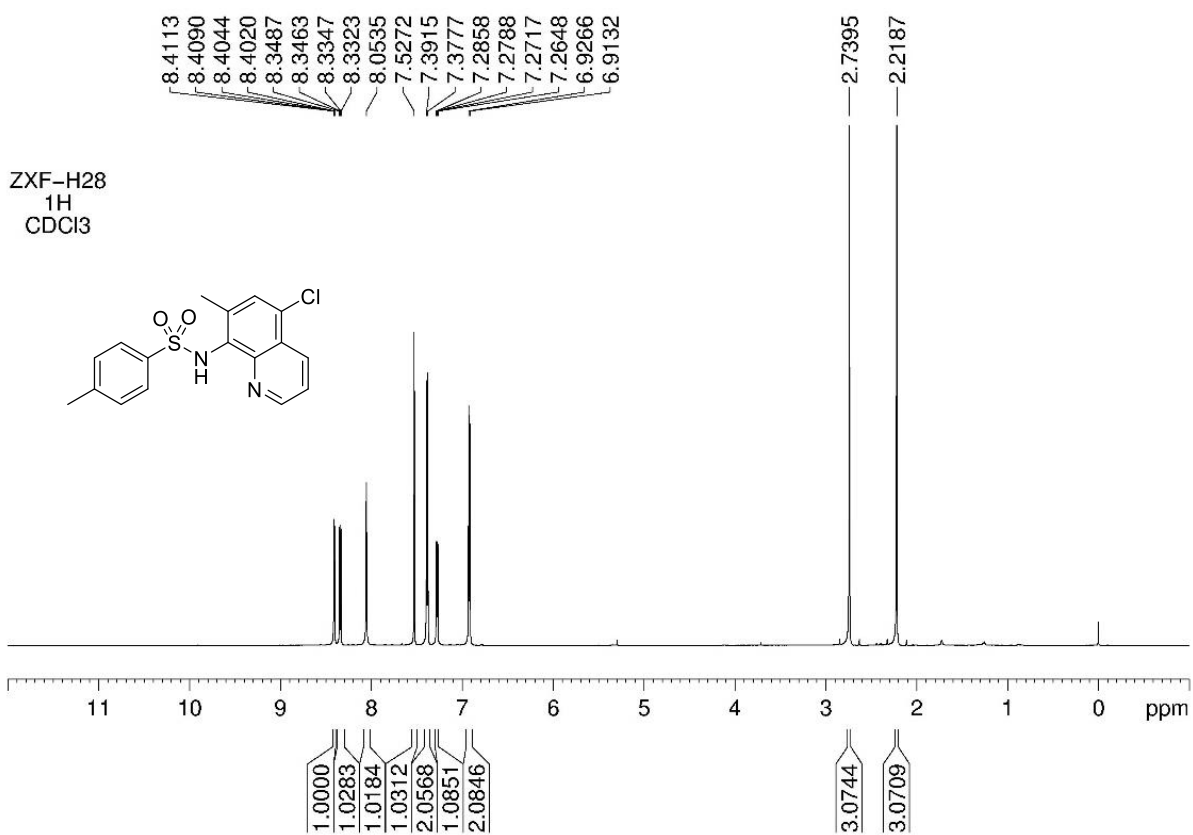

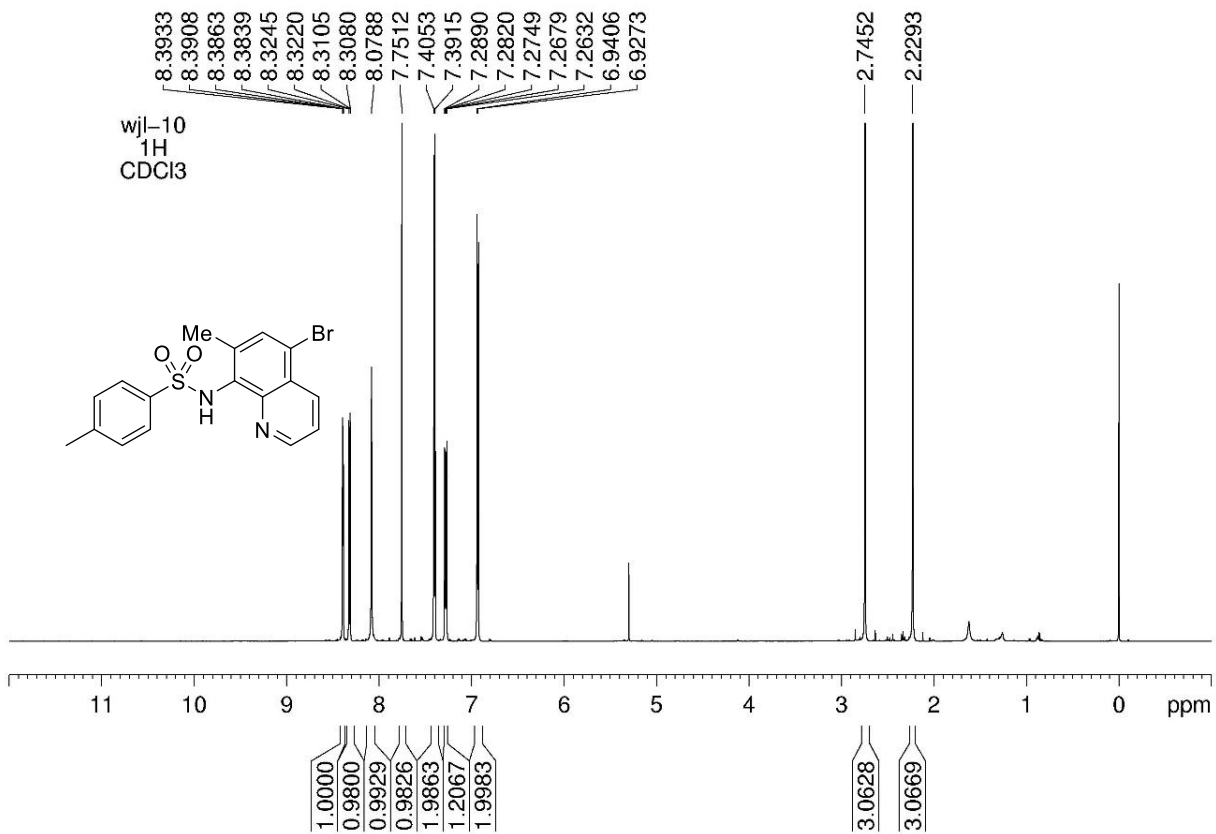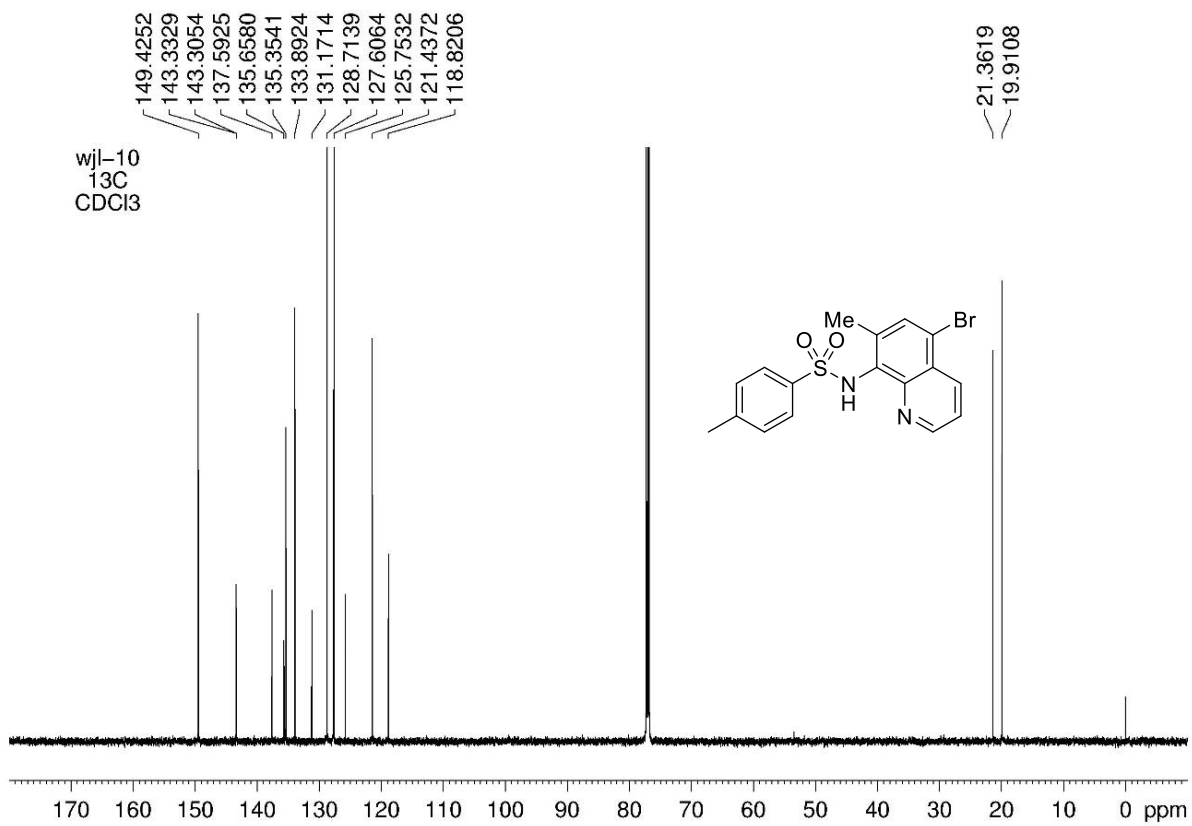

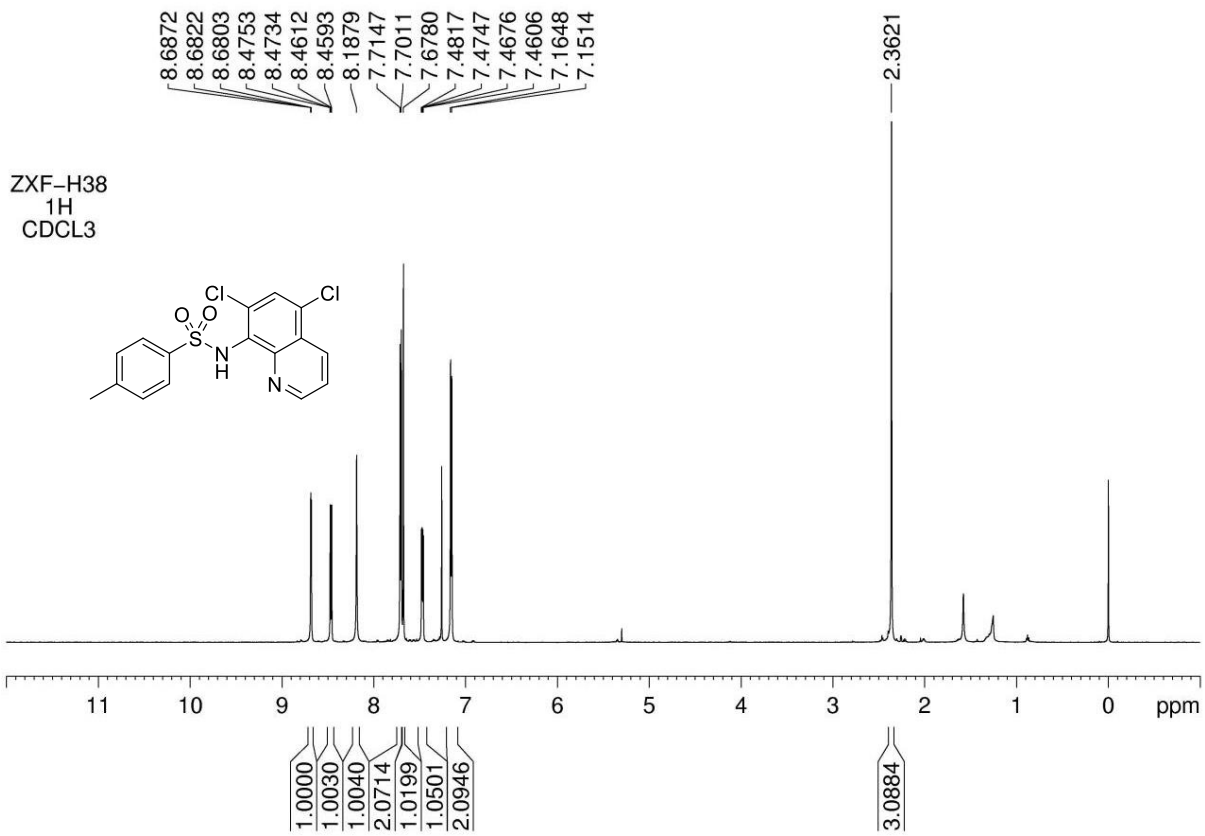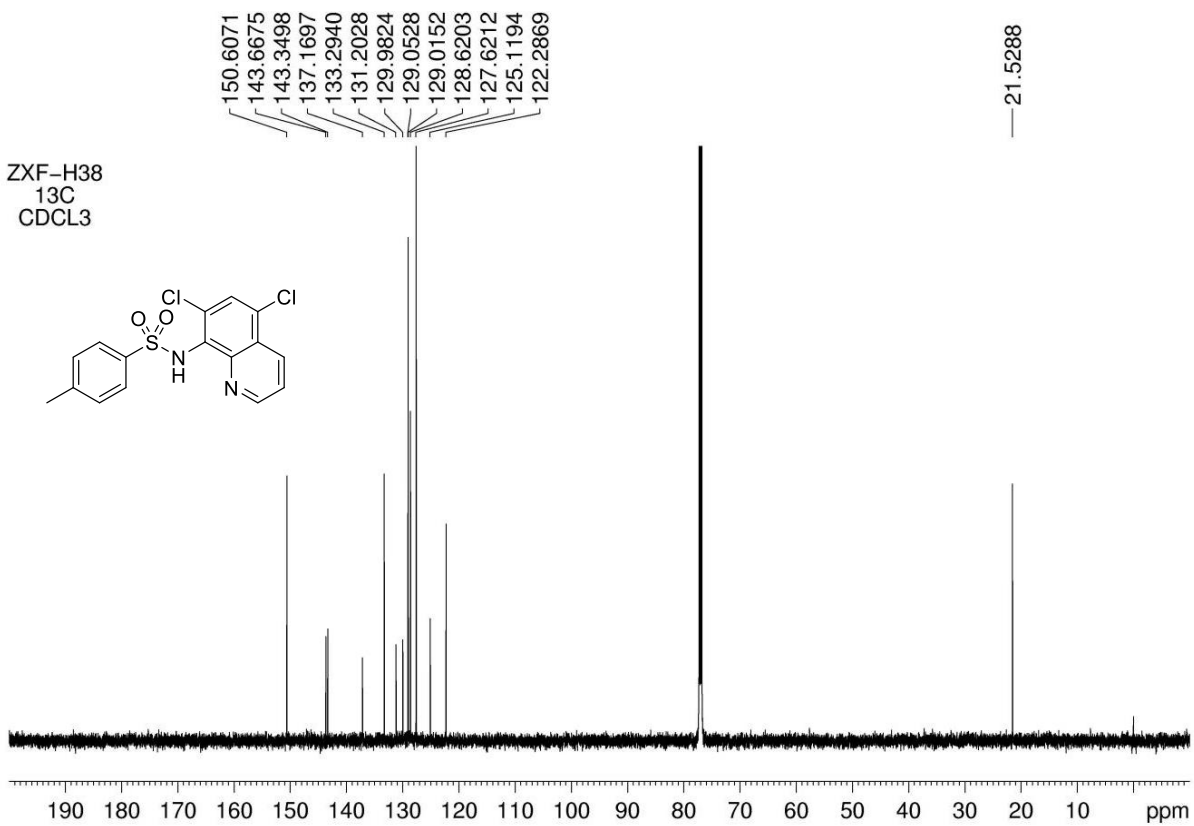

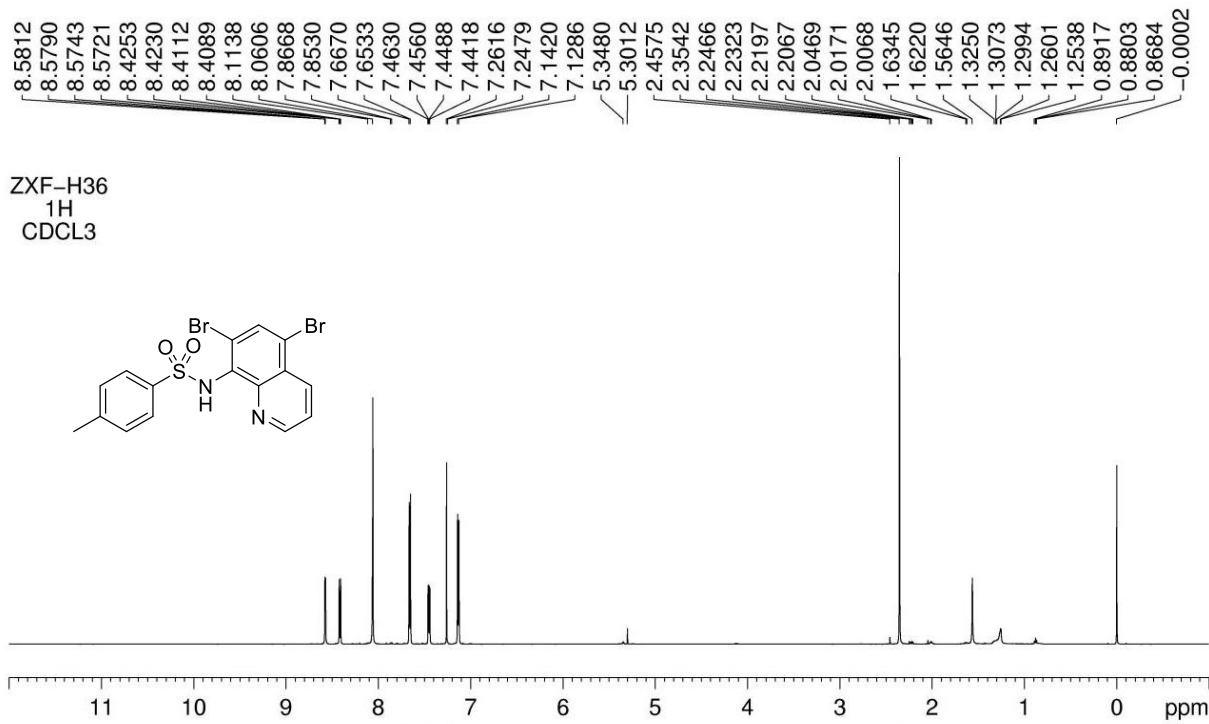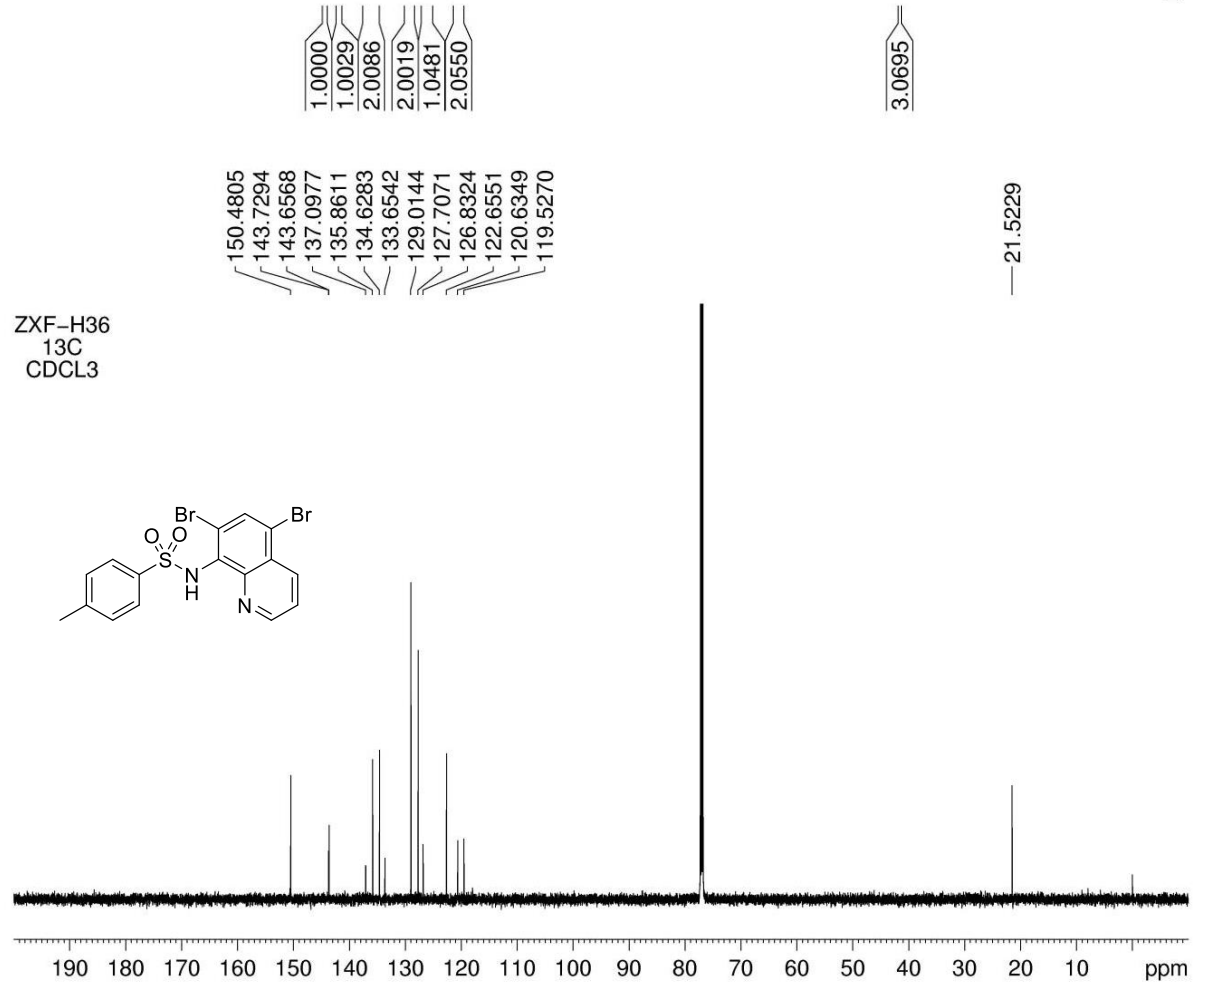

Supplement: d3sc01787g1.pdf [file d3sc01787g1.pdf]
